# Supplementary material
Source: PubMed Central journal article supplement (PMC5642381)
Supplement: 41525_2017_14_MOESM8_ESM.pdf [file 41525_2017_14_MOESM8_ESM.pdf]

| Sample     | Gene symbol | Variant | chr | start     | end       | ref      | alt    |
|------------|-------------|---------|-----|-----------|-----------|----------|--------|
| MEN0030-P0 | BRD7        | indel   | 16  | 50368678  | 50368679  | CT       | -      |
| MEN0030-P0 | CACNA1E     | indel   | 1   | 181680102 | 181680103 | AG       | -      |
| MEN0030-P0 | SRP14       | indel   | 15  | 40328597  | 40328599  | TGC      | -      |
| MEN0030-P0 | TMPRSS6     | indel   | 22  | 37466653  | 37466655  | CCA      | -      |
| MEN0030-P0 | SALL1       | indel   | 16  | 51175655  | 51175655  | -        | GCT    |
| MEN0030-P0 | SCAF4       | indel   | 21  | 33044256  | 33044256  | -        | GCTGCT |
| MEN0030-P0 | SNAPC4      | indel   | 9   | 139277995 | 139277997 | GCT      | -      |
| MEN0030-P0 | SRP14       | indel   | 15  | 40328597  | 40328599  | TGC      | -      |
| MEN0030-P0 | CACNA1E     | indel   | 1   | 181680102 | 181680103 | AG       | -      |
| MEN0030-P0 | BRD7        | indel   | 16  | 50368678  | 50368679  | CT       | -      |
| MEN0030-P0 | TMPRSS6     | indel   | 22  | 37466653  | 37466655  | CCA      | -      |
| MEN0030-P0 | SNAPC4      | indel   | 9   | 139277995 | 139277997 | GCT      | -      |
| MEN0030-P0 | SALL1       | indel   | 16  | 51175655  | 51175655  | -        | GCT    |
| MEN0030-P0 | SCAF4       | indel   | 21  | 33044256  | 33044256  | -        | GCTGCT |
| MEN0030-P1 | BRD7        | indel   | 16  | 50368678  | 50368679  | CT       | -      |
| MEN0030-P1 | CACNA1E     | indel   | 1   | 181680102 | 181680103 | AG       | -      |
| MEN0030-P1 | SRP14       | indel   | 15  | 40328597  | 40328599  | TGC      | -      |
| MEN0030-P1 | TMPRSS6     | indel   | 22  | 37466653  | 37466655  | CCA      | -      |
| MEN0030-P1 | SALL1       | indel   | 16  | 51175655  | 51175655  | -        | GCT    |
| MEN0030-P1 | SCAF4       | indel   | 21  | 33044256  | 33044256  | -        | GCTGCT |
| MEN0030-P1 | SRP14       | indel   | 15  | 40328597  | 40328599  | TGC      | -      |
| MEN0030-P1 | CACNA1E     | indel   | 1   | 181680102 | 181680103 | AG       | -      |
| MEN0030-P1 | BRD7        | indel   | 16  | 50368678  | 50368679  | CT       | -      |
| MEN0030-P1 | TMPRSS6     | indel   | 22  | 37466653  | 37466655  | CCA      | -      |
| MEN0030-P1 | SALL1       | indel   | 16  | 51175655  | 51175655  | -        | GCT    |
| MEN0030-P1 | SCAF4       | indel   | 21  | 33044256  | 33044256  | -        | GCTGCT |
| MEN0042-P0 | OTOP1       | indel   | 4   | 4228274   | 4228282   | CCACAGCA | -      |
| MEN0042-P0 | KMT2C       | indel   | 7   | 151874148 | 151874148 | T        | -      |
| MEN0042-P0 | PLAT        | indel   | 8   | 42038123  | 42038123  | A        | -      |
| MEN0042-P0 | CRIPAK      | indel   | 4   | 1388498   | 1388501   | CACA     | -      |
| MEN0042-P0 | MED24       | indel   | 17  | 38187423  | 38187423  | A        | -      |
| MEN0042-P0 | TPTE        | indel   | 21  | 10944697  | 10944697  | A        | -      |
| MEN0042-P0 | SLAMF1      | indel   | 1   | 160589601 | 160589601 | T        | -      |
| MEN0042-P0 | TGFBR2      | indel   | 3   | 30691872  | 30691872  | A        | -      |
| MEN0042-P0 | EP400       | indel   | 12  | 132547093 | 132547093 | -        | CAG    |
| MEN0042-P0 | BEGAIN      | indel   | 14  | 101005271 | 101005273 | CCT      | -      |
| MEN0042-P0 | CDKN2C      | indel   | 1   | 51439798  | 51439798  | C        | -      |
| MEN0042-P0 | KDM6A       | indel   | X   | 44922688  | 44922691  | CAGG     | -      |
| MEN0042-P0 | GOLGA8R     | indel   | 15  | 30700168  | 30700168  | -        | TTG    |
| MEN0042-P0 | TPCN1       | indel   | 12  | 113704096 | 113704098 | CTG      | -      |
| MEN0042-P0 | TNFRSF4     | indel   | 1   | 1148074   | 1148074   | G        | -      |
| MEN0042-P0 | CEBPZ       | indel   | 2   | 37454908  | 37454908  | T        | -      |
| MEN0042-P0 | SACS        | indel   | 13  | 23914687  | 23914687  | T        | -      |
| MEN0042-P0 | BRD7        | indel   | 16  | 50368678  | 50368679  | CT       | -      |
| MEN0042-P0 | AMT         | indel   | 3   | 49459653  | 49459653  | -        | C      |
| MEN0042-P0 | CHD2        | indel   | 15  | 93545433  | 93545433  | -        | A      |

|            |          |       |    |           |           |            |          |
|------------|----------|-------|----|-----------|-----------|------------|----------|
| MEN0042-PO | FSCB     | indel | 14 | 44974154  | 44974154  | -          | GGGGCCTC |
| MEN0042-PO | PLAC4    | indel | 21 | 42551272  | 42551272  | C          | -        |
| MEN0042-PO | POM121   | indel | 7  | 72413723  | 72413723  | -          | CTC      |
| MEN0042-PO | ABL1     | indel | 9  | 133759490 | 133759492 | AAG        | -        |
| MEN0042-PO | PDILT    | indel | 16 | 20370700  | 20370702  | CCA        | -        |
| MEN0042-PO | SLC25A5  | indel | X  | 118603706 | 118603706 | -          | G        |
| MEN0042-PO | INA      | indel | 10 | 105048271 | 105048273 | GAG        | -        |
| MEN0042-PO | KRTAP4-1 | indel | 17 | 39340796  | 39340852  | CGGCAGC/-  | -        |
| MEN0042-PO | KANK1    | indel | 9  | 732475    | 732477    | GAG        | -        |
| MEN0042-PO | TMEM63A  | indel | 1  | 226034840 | 226034842 | CTG        | -        |
| MEN0042-PO | GAGE2D   | indel | X  | 49208295  | 49208295  | -          | TAT      |
| MEN0042-PO | ADAMTS7  | indel | 15 | 79058183  | 79058183  | -          | TGGGTCC  |
| MEN0042-PO | CDC27    | indel | 17 | 45219612  | 45219612  | A          | -        |
| MEN0042-PO | TERF2IP  | indel | 16 | 75690204  | 75690206  | GAA        | -        |
| MEN0042-PO | ATXN1    | indel | 6  | 16327913  | 16327915  | TGA        | -        |
| MEN0042-PO | SLC51A   | indel | 3  | 195955100 | 195955102 | CTG        | -        |
| MEN0042-PO | CDC42EP1 | indel | 22 | 37964409  | 37964429  | CAGCGCCT-  | -        |
| MEN0042-PO | KRTAP4-5 | indel | 17 | 39305775  | 39305775  | -          | GGCAGCA  |
| MEN0042-PO | UBXN11   | indel | 1  | 26608878  | 26608883  | CCGGGA     | -        |
| MEN0042-PO | CCNT1    | indel | 12 | 49087434  | 49087436  | ATG        | -        |
| MEN0042-PO | KRTAP5-5 | indel | 11 | 1651199   | 1651199   | -          | GGCTGTGC |
| MEN0042-PO | FAM155A  | indel | 13 | 108518687 | 108518689 | CTG        | -        |
| MEN0042-PO | CCAR1    | indel | 10 | 70509285  | 70509286  | GA         | -        |
| MEN0042-PO | CD3EAP   | indel | 19 | 45911859  | 45911861  | GAA        | -        |
| MEN0042-PO | CTNND2   | indel | 5  | 11110989  | 11110991  | TTC        | -        |
| MEN0042-PO | CEBPZ    | indel | 2  | 37454908  | 37454908  | T          | -        |
| MEN0042-PO | ABL1     | indel | 9  | 133759490 | 133759492 | AAG        | -        |
| MEN0042-PO | SACS     | indel | 13 | 23914687  | 23914687  | T          | -        |
| MEN0042-PO | CRIPAK   | indel | 4  | 1388498   | 1388501   | CACA       | -        |
| MEN0042-PO | OTOP1    | indel | 4  | 4228274   | 4228282   | CCACAGCA/- | -        |
| MEN0042-PO | POM121   | indel | 7  | 72413723  | 72413723  | -          | CTC      |
| MEN0042-PO | KMT2C    | indel | 7  | 151874148 | 151874148 | T          | -        |
| MEN0042-PO | SLAMF1   | indel | 1  | 160589601 | 160589601 | T          | -        |
| MEN0042-PO | TGFBR2   | indel | 3  | 30691872  | 30691872  | A          | -        |
| MEN0042-PO | PLAT     | indel | 8  | 42038123  | 42038123  | A          | -        |
| MEN0042-PO | EP400    | indel | 12 | 132445252 | 132445252 | -          | C        |
| MEN0042-PO | GAGE2D   | indel | X  | 49208295  | 49208295  | -          | TAT      |
| MEN0042-PO | BRD7     | indel | 16 | 50368678  | 50368679  | CT         | -        |
| MEN0042-PO | AMT      | indel | 3  | 49459653  | 49459653  | -          | C        |
| MEN0042-PO | BEGAIN   | indel | 14 | 101005271 | 101005273 | CCT        | -        |
| MEN0042-PO | TPCN1    | indel | 12 | 113704096 | 113704098 | CTG        | -        |
| MEN0042-PO | MED24    | indel | 17 | 38187423  | 38187423  | A          | -        |
| MEN0042-PO | PLAC4    | indel | 21 | 42551272  | 42551272  | C          | -        |
| MEN0042-PO | CDC27    | indel | 17 | 45219612  | 45219612  | A          | -        |
| MEN0042-PO | TNFRSF4  | indel | 1  | 1148074   | 1148074   | G          | -        |
| MEN0042-PO | PDILT    | indel | 16 | 20370700  | 20370702  | CCA        | -        |
| MEN0042-PO | KDM6A    | indel | X  | 44922688  | 44922691  | CAGG       | -        |

|            |          |       |    |           |           |           |          |
|------------|----------|-------|----|-----------|-----------|-----------|----------|
| MEN0042-P0 | PHF2     | indel | 9  | 96439004  | 96439004  | -         | CCTGCCTC |
| MEN0042-P0 | CDC42EP1 | indel | 22 | 37964409  | 37964429  | CAGCGCCT- |          |
| MEN0042-P0 | SLC25A5  | indel | X  | 118603706 | 118603706 | -         | G        |
| MEN0042-P0 | TPTE     | indel | 21 | 10944697  | 10944697  | A         | -        |
| MEN0042-P0 | GOLGA8R  | indel | 15 | 30700168  | 30700168  | -         | TTG      |
| MEN0042-P0 | KANK1    | indel | 9  | 732475    | 732477    | GAG       | -        |
| MEN0042-P0 | CD3EAP   | indel | 19 | 45911859  | 45911861  | GAA       | -        |
| MEN0042-P0 | CDKN2C   | indel | 1  | 51439798  | 51439798  | C         | -        |
| MEN0042-P0 | TMEM63A  | indel | 1  | 226034840 | 226034842 | CTG       | -        |
| MEN0042-P0 | FSCB     | indel | 14 | 44974154  | 44974154  | -         | GGGGCCTC |
| MEN0042-P0 | CTNND2   | indel | 5  | 11110989  | 11110991  | TTC       | -        |
| MEN0042-P0 | SLC51A   | indel | 3  | 195955100 | 195955102 | CTG       | -        |
| MEN0042-P0 | KRTAP4-1 | indel | 17 | 39340796  | 39340852  | CGGCAGC/- |          |
| MEN0042-P0 | INA      | indel | 10 | 105048271 | 105048273 | GAG       | -        |
| MEN0042-P0 | ADAMTS7  | indel | 15 | 79058183  | 79058183  | -         | TGGGTCC  |
| MEN0042-P0 | KRTAP5-5 | indel | 11 | 1651199   | 1651199   | -         | GGCTGTGC |
| MEN0042-P0 | CADM1    | indel | 11 | 115080312 | 115080314 | TGG       | -        |
| MEN0042-P0 | CHD2     | indel | 15 | 93545433  | 93545433  | -         | A        |
| MEN0042-P0 | CCNT1    | indel | 12 | 49087434  | 49087436  | ATG       | -        |
| MEN0042-P0 | TERF2IP  | indel | 16 | 75690204  | 75690206  | GAA       | -        |
| MEN0042-P0 | KRTAP4-5 | indel | 17 | 39305775  | 39305775  | -         | GGCAGCA  |
| MEN0042-P0 | UBXN11   | indel | 1  | 26608878  | 26608883  | CCGGGA    | -        |
| MEN0042-P0 | TSC22D1  | indel | 13 | 45148706  | 45148708  | TGC       | -        |
| MEN0042-P0 | FAM155A  | indel | 13 | 108518687 | 108518689 | CTG       | -        |
| MEN0042-P0 | CCAR1    | indel | 10 | 70509285  | 70509286  | GA        | -        |
| MEN0042-P0 | ATXN1    | indel | 6  | 16327913  | 16327915  | TGA       | -        |
| MEN0042-P2 | APAF1    | indel | 12 | 99117445  | 99117445  | A         | -        |
| MEN0042-P2 | PLAT     | indel | 8  | 42038123  | 42038123  | A         | -        |
| MEN0042-P2 | SLC24A1  | indel | 15 | 65918177  | 65918179  | CTG       | -        |
| MEN0042-P2 | PABPC3   | indel | 13 | 25671273  | 25671273  | G         | -        |
| MEN0042-P2 | OR7C1    | indel | 19 | 14910638  | 14910638  | A         | -        |
| MEN0042-P2 | KCND3    | indel | 1  | 112524444 | 112524444 | -         | G        |
| MEN0042-P2 | CDKN2C   | indel | 1  | 51439798  | 51439798  | C         | -        |
| MEN0042-P2 | COL5A3   | indel | 19 | 10071225  | 10071225  | T         | -        |
| MEN0042-P2 | SLC5A11  | indel | 16 | 24921737  | 24921739  | CAG       | -        |
| MEN0042-P2 | MAGI1    | indel | 3  | 65372850  | 65372851  | TC        | -        |
| MEN0042-P2 | KCNN3    | indel | 1  | 154680586 | 154680588 | GCT       | -        |
| MEN0042-P2 | KDM6A    | indel | X  | 44922688  | 44922691  | CAGG      | -        |
| MEN0042-P2 | GOLGA8R  | indel | 15 | 30700168  | 30700168  | -         | TTG      |
| MEN0042-P2 | CHEK1    | indel | 11 | 125505377 | 125505377 | -         | A        |
| MEN0042-P2 | CCDC30   | indel | 1  | 43002200  | 43002201  | AG        | -        |
| MEN0042-P2 | BRD7     | indel | 16 | 50368678  | 50368679  | CT        | -        |
| MEN0042-P2 | SLC9B1   | indel | 4  | 103822483 | 103822484 | AC        | -        |
| MEN0042-P2 | TRPV1    | indel | 17 | 3491527   | 3491527   | -         | T        |
| MEN0042-P2 | PEX1     | indel | 7  | 92146721  | 92146721  | T         | -        |
| MEN0042-P2 | FSCB     | indel | 14 | 44974154  | 44974154  | -         | GGGGCCTC |
| MEN0042-P2 | HAX1     | indel | 1  | 154245864 | 154245866 | GAA       | -        |

|            |          |       |    |           |           |          |         |
|------------|----------|-------|----|-----------|-----------|----------|---------|
| MEN0042-P2 | ALS2CR11 | indel | 2  | 202352382 | 202352387 | AATCTG   | -       |
| MEN0042-P2 | TMEM255B | indel | 13 | 114503876 | 114503957 | CCTGCGGC | -       |
| MEN0042-P2 | GBP3     | indel | 1  | 89473441  | 89473441  | -        | T       |
| MEN0042-P2 | MNS1     | indel | 15 | 56736723  | 56736723  | T        | -       |
| MEN0042-P2 | SLC25A5  | indel | X  | 118603706 | 118603706 | -        | G       |
| MEN0042-P2 | WNK1     | indel | 12 | 970297    | 970297    | A        | -       |
| MEN0042-P2 | PRRC2C   | indel | 1  | 171511148 | 171511148 | -        | A       |
| MEN0042-P2 | ANGPT2   | indel | 8  | 6378797   | 6378797   | -        | T       |
| MEN0042-P2 | KRTAP4-1 | indel | 17 | 39340796  | 39340852  | CGGCAGCA | -       |
| MEN0042-P2 | MBD4     | indel | 3  | 129155548 | 129155548 | T        | -       |
| MEN0042-P2 | GAGE2D   | indel | X  | 49208295  | 49208295  | -        | TAT     |
| MEN0042-P2 | PITX1    | indel | 5  | 134369504 | 134369506 | GGC      | -       |
| MEN0042-P2 | SLTM     | indel | 15 | 59182564  | 59182565  | CT       | -       |
| MEN0042-P2 | CWC27    | indel | 5  | 64082402  | 64082402  | A        | -       |
| MEN0042-P2 | ZFR      | indel | 5  | 32404161  | 32404161  | T        | -       |
| MEN0042-P2 | FIP1L1   | indel | 4  | 54319248  | 54319249  | AG       | -       |
| MEN0042-P2 | CDC42EP1 | indel | 22 | 37964409  | 37964429  | CAGCGCCT | -       |
| MEN0042-P2 | KRTAP4-5 | indel | 17 | 39305775  | 39305775  | -        | GGCAGCA |
| MEN0042-P2 | UBXN11   | indel | 1  | 26608878  | 26608883  | CCGGGA   | -       |
| MEN0042-P2 | CCNT1    | indel | 12 | 49087434  | 49087436  | ATG      | -       |
| MEN0042-P2 | ZNF395   | indel | 8  | 28209226  | 28209228  | GCA      | -       |
| MEN0042-P2 | ERC2     | indel | 3  | 55733470  | 55733472  | TGG      | -       |
| MEN0042-P2 | CTNND2   | indel | 5  | 11110989  | 11110991  | TTC      | -       |
| MEN0042-P2 | ZNF395   | indel | 8  | 28209226  | 28209228  | GCA      | -       |
| MEN0042-P2 | PEX1     | indel | 7  | 92146721  | 92146721  | T        | -       |
| MEN0042-P2 | COL5A3   | indel | 19 | 10071225  | 10071225  | T        | -       |
| MEN0042-P2 | KCND3    | indel | 1  | 112524444 | 112524444 | -        | G       |
| MEN0042-P2 | TMEM255B | indel | 13 | 114503876 | 114503957 | CCTGCGGC | -       |
| MEN0042-P2 | APAF1    | indel | 12 | 99117445  | 99117445  | A        | -       |
| MEN0042-P2 | PABPC3   | indel | 13 | 25671273  | 25671273  | G        | -       |
| MEN0042-P2 | ALS2CR11 | indel | 2  | 202352382 | 202352387 | AATCTG   | -       |
| MEN0042-P2 | CWC27    | indel | 5  | 64082402  | 64082402  | A        | -       |
| MEN0042-P2 | PLAT     | indel | 8  | 42038123  | 42038123  | A        | -       |
| MEN0042-P2 | GAGE2D   | indel | X  | 49208295  | 49208295  | -        | TAT     |
| MEN0042-P2 | GBP3     | indel | 1  | 89473441  | 89473441  | -        | T       |
| MEN0042-P2 | BRD7     | indel | 16 | 50368678  | 50368679  | CT       | -       |
| MEN0042-P2 | MAGI1    | indel | 3  | 65372850  | 65372851  | TC       | -       |
| MEN0042-P2 | SLC9B1   | indel | 4  | 103822483 | 103822484 | AC       | -       |
| MEN0042-P2 | KDM6A    | indel | X  | 44922688  | 44922691  | CAGG     | -       |
| MEN0042-P2 | CDC42EP1 | indel | 22 | 37964409  | 37964429  | CAGCGCCT | -       |
| MEN0042-P2 | KCNN3    | indel | 1  | 154680586 | 154680588 | GCT      | -       |
| MEN0042-P2 | SLC5A11  | indel | 16 | 24921737  | 24921739  | CAG      | -       |
| MEN0042-P2 | OR7C1    | indel | 19 | 14910638  | 14910638  | A        | -       |
| MEN0042-P2 | WNK1     | indel | 12 | 970297    | 970297    | A        | -       |
| MEN0042-P2 | SLC25A5  | indel | X  | 118603706 | 118603706 | -        | G       |
| MEN0042-P2 | GOLGA8R  | indel | 15 | 30700168  | 30700168  | -        | TTG     |
| MEN0042-P2 | ZFR      | indel | 5  | 32404161  | 32404161  | T        | -       |

|             |          |       |    |           |           |           |          |
|-------------|----------|-------|----|-----------|-----------|-----------|----------|
| MEN0042-P2  | MNS1     | indel | 15 | 56736723  | 56736723  | T         | -        |
| MEN0042-P2  | SLC24A1  | indel | 15 | 65918177  | 65918179  | CTG       | -        |
| MEN0042-P2  | CHEK1    | indel | 11 | 125505377 | 125505377 | -         | A        |
| MEN0042-P2  | ERC2     | indel | 3  | 55733470  | 55733472  | TGG       | -        |
| MEN0042-P2  | CDKN2C   | indel | 1  | 51439798  | 51439798  | C         | -        |
| MEN0042-P2  | MBD4     | indel | 3  | 129155548 | 129155548 | T         | -        |
| MEN0042-P2  | TRPV1    | indel | 17 | 3491527   | 3491527   | -         | T        |
| MEN0042-P2  | SLTM     | indel | 15 | 59182564  | 59182565  | CT        | -        |
| MEN0042-P2  | FSCB     | indel | 14 | 44974154  | 44974154  | -         | GGGGCCTC |
| MEN0042-P2  | CTNND2   | indel | 5  | 11110989  | 11110991  | TTC       | -        |
| MEN0042-P2  | KRTAP4-1 | indel | 17 | 39340796  | 39340852  | CGGCAGC/- | -        |
| MEN0042-P2  | ANGPT2   | indel | 8  | 6378797   | 6378797   | -         | T        |
| MEN0042-P2  | HAX1     | indel | 1  | 154245864 | 154245866 | GAA       | -        |
| MEN0042-P2  | CCNT1    | indel | 12 | 49087434  | 49087436  | ATG       | -        |
| MEN0042-P2  | CCDC30   | indel | 1  | 43002200  | 43002201  | AG        | -        |
| MEN0042-P2  | PITX1    | indel | 5  | 134369504 | 134369506 | GGC       | -        |
| MEN0042-P2  | KRTAP4-5 | indel | 17 | 39305775  | 39305775  | -         | GGCAGCAI |
| MEN0042-P2  | UBXN11   | indel | 1  | 26608878  | 26608883  | CCGGGA    | -        |
| MEN0042-P2  | PRRC2C   | indel | 1  | 171511148 | 171511148 | -         | A        |
| MEN0042-P2  | FIP1L1   | indel | 4  | 54319248  | 54319249  | AG        | -        |
| MEN0042G-P1 | PLAT     | indel | 8  | 42038123  | 42038123  | A         | -        |
| MEN0042G-P1 | CDKN2C   | indel | 1  | 51439798  | 51439798  | C         | -        |
| MEN0042G-P1 | KDM6A    | indel | X  | 44922688  | 44922691  | CAGG      | -        |
| MEN0042G-P1 | PLAT     | indel | 8  | 42038123  | 42038123  | A         | -        |
| MEN0042G-P1 | KDM6A    | indel | X  | 44922688  | 44922691  | CAGG      | -        |
| MEN0042G-P1 | CDKN2C   | indel | 1  | 51439798  | 51439798  | C         | -        |
| MEN0045-P3  | NF2      | indel | 22 | 30067836  | 30067836  | C         | -        |
| MEN0045-P3  | ABL1     | indel | 9  | 133759490 | 133759492 | AAG       | -        |
| MEN0045-P3  | ABL1     | indel | 9  | 133759490 | 133759492 | AAG       | -        |
| MEN0045-P3  | NF2      | indel | 22 | 30067836  | 30067836  | C         | -        |
| MEN0048-P0  | TPTE     | indel | 21 | 10944697  | 10944697  | A         | -        |
| MEN0048-P0  | CRIPAK   | indel | 4  | 1388441   | 1388441   | -         | CG       |
| MEN0048-P0  | SLC9B1   | indel | 4  | 103822483 | 103822484 | AC        | -        |
| MEN0048-P0  | BRD7     | indel | 16 | 50368678  | 50368679  | CT        | -        |
| MEN0048-P0  | ADAMTSL4 | indel | 1  | 150530506 | 150530506 | G         | -        |
| MEN0048-P0  | INPP5E   | indel | 9  | 139333416 | 139333416 | C         | -        |
| MEN0048-P0  | TSKU     | indel | 11 | 76506673  | 76506675  | CTG       | -        |
| MEN0048-P0  | SLC35D2  | indel | 9  | 99126780  | 99126783  | TGAA      | -        |
| MEN0048-P0  | HLA-F    | indel | 6  | 29694802  | 29694802  | -         | T        |
| MEN0048-P0  | PTPN4    | indel | 2  | 120643407 | 120643408 | AA        | -        |
| MEN0048-P0  | PASD1    | indel | X  | 150817142 | 150817144 | GCT       | -        |
| MEN0048-P0  | POM121   | indel | 7  | 72413723  | 72413723  | -         | CTC      |
| MEN0048-P0  | SLC25A5  | indel | X  | 118603706 | 118603706 | -         | G        |
| MEN0048-P0  | NOVA1    | indel | 14 | 27066575  | 27066576  | GG        | -        |
| MEN0048-P0  | ALPP     | indel | 2  | 233243529 | 233243531 | TGC       | -        |
| MEN0048-P0  | CACNA1E  | indel | 1  | 181680102 | 181680103 | AG        | -        |
| MEN0048-P0  | LRRIQ3   | indel | 1  | 74575212  | 74575212  | -         | T        |

|            |          |       |    |           |           |           |     |
|------------|----------|-------|----|-----------|-----------|-----------|-----|
| MEN0048-PO | KRTAP4-1 | indel | 17 | 39340796  | 39340852  | CGGCAGC/- |     |
| MEN0048-PO | ECM2     | indel | 9  | 95277146  | 95277148  | TCC       | -   |
| MEN0048-PO | TPCN1    | indel | 12 | 113704096 | 113704098 | CTG       | -   |
| MEN0048-PO | XPC      | indel | 3  | 14219966  | 14219968  | CCT       | -   |
| MEN0048-PO | AP3S1    | indel | 5  | 115202418 | 115202421 | AAGA      | -   |
| MEN0048-PO | TMCC1    | indel | 3  | 129546680 | 129546682 | GCA       | -   |
| MEN0048-PO | NPIPA5   | indel | 16 | 15457565  | 15457566  | AC        | -   |
| MEN0048-PO | GOLGA8R  | indel | 15 | 30700168  | 30700168  | -         | TTG |
| MEN0048-PO | CLOCK    | indel | 4  | 56304530  | 56304532  | CTG       | -   |
| MEN0048-PO | PRG4     | indel | 1  | 186276143 | 186276145 | CTC       | -   |
| MEN0048-PO | LRP10    | indel | 14 | 23341527  | 23341529  | CCT       | -   |
| MEN0048-PO | MKI67    | indel | 10 | 129905112 | 129905113 | TG        | -   |
| MEN0048-PO | TMEM63A  | indel | 1  | 226034840 | 226034842 | CTG       | -   |
| MEN0048-PO | TNN      | indel | 1  | 175086297 | 175086301 | AGGGG     | -   |
| MEN0048-PO | EMC7     | indel | 15 | 34393991  | 34393993  | AGC       | -   |
| MEN0048-PO | SLC8A2   | indel | 19 | 47935681  | 47935683  | TCC       | -   |
| MEN0048-PO | TCHH     | indel | 1  | 152082957 | 152082959 | CTC       | -   |
| MEN0048-PO | CTNND2   | indel | 5  | 11110989  | 11110991  | TTC       | -   |
| MEN0048-PO | BHLHB9   | indel | X  | 102004419 | 102004421 | GAG       | -   |
| MEN0048-PO | KLHL41   | indel | 2  | 170367102 | 170367103 | AA        | -   |
| MEN0048-PO | ZFR      | indel | 5  | 32419951  | 32419953  | GGT       | -   |
| MEN0048-PO | PTPN14   | indel | 1  | 214557049 | 214557051 | CCT       | -   |
| MEN0048-PO | HAX1     | indel | 1  | 154245864 | 154245866 | GAA       | -   |
| MEN0048-PO | SLC51A   | indel | 3  | 195955100 | 195955102 | CTG       | -   |
| MEN0048-PO | RSPH6A   | indel | 19 | 46299147  | 46299149  | CCT       | -   |
| MEN0048-PO | CTCFL    | indel | 20 | 56099187  | 56099187  | T         | -   |
| MEN0048-PO | SCAF4    | indel | 21 | 33044257  | 33044259  | GCT       | -   |
| MEN0048-PO | MAMLD1   | indel | X  | 149639633 | 149639635 | GCA       | -   |
| MEN0048-PO | PASD1    | indel | X  | 150817142 | 150817144 | GCT       | -   |
| MEN0048-PO | TMCC1    | indel | 3  | 129370576 | 129370578 | CTG       | -   |
| MEN0048-PO | POM121   | indel | 7  | 72413723  | 72413723  | -         | CTC |
| MEN0048-PO | CACNA1E  | indel | 1  | 181680102 | 181680103 | AG        | -   |
| MEN0048-PO | ADAMTSL4 | indel | 1  | 150530506 | 150530506 | G         | -   |
| MEN0048-PO | LRP10    | indel | 14 | 23341527  | 23341529  | CCT       | -   |
| MEN0048-PO | TSKU     | indel | 11 | 76506673  | 76506675  | CTG       | -   |
| MEN0048-PO | SLC35D2  | indel | 9  | 99126780  | 99126783  | TGAA      | -   |
| MEN0048-PO | CRIPAK   | indel | 4  | 1389382   | 1389382   | C         | -   |
| MEN0048-PO | PTPN4    | indel | 2  | 120643407 | 120643408 | AA        | -   |
| MEN0048-PO | INPP5E   | indel | 9  | 139333416 | 139333416 | C         | -   |
| MEN0048-PO | NOVA1    | indel | 14 | 27066575  | 27066576  | GG        | -   |
| MEN0048-PO | LRRIQ3   | indel | 1  | 74575212  | 74575212  | -         | T   |
| MEN0048-PO | HLA-F    | indel | 6  | 29694802  | 29694802  | -         | T   |
| MEN0048-PO | AP3S1    | indel | 5  | 115202418 | 115202421 | AAGA      | -   |
| MEN0048-PO | SLC9B1   | indel | 4  | 103822483 | 103822484 | AC        | -   |
| MEN0048-PO | TPCN1    | indel | 12 | 113704096 | 113704098 | CTG       | -   |
| MEN0048-PO | SLC25A5  | indel | X  | 118603706 | 118603706 | -         | G   |
| MEN0048-PO | GOLGA8R  | indel | 15 | 30700168  | 30700168  | -         | TTG |

|            |          |       |    |           |           |           |     |
|------------|----------|-------|----|-----------|-----------|-----------|-----|
| MEN0048-P0 | EMC7     | indel | 15 | 34393991  | 34393993  | AGC       | -   |
| MEN0048-P0 | ALPP     | indel | 2  | 233243529 | 233243531 | TGC       | -   |
| MEN0048-P0 | BRD7     | indel | 16 | 50368678  | 50368679  | CT        | -   |
| MEN0048-P0 | KLHL41   | indel | 2  | 170367102 | 170367103 | AA        | -   |
| MEN0048-P0 | CTNND2   | indel | 5  | 11110989  | 11110991  | TTC       | -   |
| MEN0048-P0 | TMEM63A  | indel | 1  | 226034840 | 226034842 | CTG       | -   |
| MEN0048-P0 | KRTAP4-1 | indel | 17 | 39340796  | 39340852  | CGGCAGC/- | -   |
| MEN0048-P0 | SLC8A2   | indel | 19 | 47935681  | 47935683  | TCC       | -   |
| MEN0048-P0 | TPTE     | indel | 21 | 10944697  | 10944697  | A         | -   |
| MEN0048-P0 | TNN      | indel | 1  | 175086297 | 175086301 | AGGGG     | -   |
| MEN0048-P0 | PRG4     | indel | 1  | 186276143 | 186276145 | CTC       | -   |
| MEN0048-P0 | NPIPA5   | indel | 16 | 15457565  | 15457566  | AC        | -   |
| MEN0048-P0 | MKI67    | indel | 10 | 129905112 | 129905113 | TG        | -   |
| MEN0048-P0 | ZFR      | indel | 5  | 32419951  | 32419953  | GGT       | -   |
| MEN0048-P0 | CTCFL    | indel | 20 | 56099187  | 56099187  | T         | -   |
| MEN0048-P0 | TCHH     | indel | 1  | 152082957 | 152082959 | CTC       | -   |
| MEN0048-P0 | PTPN14   | indel | 1  | 214557049 | 214557051 | CCT       | -   |
| MEN0048-P0 | SLC51A   | indel | 3  | 195955100 | 195955102 | CTG       | -   |
| MEN0048-P0 | CLOCK    | indel | 4  | 56304530  | 56304532  | CTG       | -   |
| MEN0048-P0 | HAX1     | indel | 1  | 154245864 | 154245866 | GAA       | -   |
| MEN0048-P0 | XPC      | indel | 3  | 14219966  | 14219968  | CCT       | -   |
| MEN0048-P0 | BHLHB9   | indel | X  | 102004419 | 102004421 | GAG       | -   |
| MEN0048-P0 | ECM2     | indel | 9  | 95277146  | 95277148  | TCC       | -   |
| MEN0048-P0 | MAMLD1   | indel | X  | 149639633 | 149639635 | GCA       | -   |
| MEN0048-P0 | SCAF4    | indel | 21 | 33044257  | 33044259  | GCT       | -   |
| MEN0048-P0 | RSPH6A   | indel | 19 | 46299147  | 46299149  | CCT       | -   |
| MEN0048-P0 | HMGB3    | indel | X  | 150156358 | 150156360 | GAG       | -   |
| MEN0048-P2 | CACNA1B  | indel | 9  | 140968025 | 140968027 | TCC       | -   |
| MEN0048-P2 | CRIPAK   | indel | 4  | 1389382   | 1389382   | C         | -   |
| MEN0048-P2 | KIF7     | indel | 15 | 90174936  | 90174936  | G         | -   |
| MEN0048-P2 | SLC9B1   | indel | 4  | 103822483 | 103822484 | AC        | -   |
| MEN0048-P2 | BRD7     | indel | 16 | 50368678  | 50368679  | CT        | -   |
| MEN0048-P2 | FCER2    | indel | 19 | 7763700   | 7763700   | C         | -   |
| MEN0048-P2 | LOXL3    | indel | 2  | 74763923  | 74763923  | -         | C   |
| MEN0048-P2 | GAGE2D   | indel | X  | 49208295  | 49208295  | -         | TAT |
| MEN0048-P2 | WNK1     | indel | 12 | 970297    | 970297    | A         | -   |
| MEN0048-P2 | OPA1     | indel | 3  | 193332768 | 193332769 | CT        | -   |
| MEN0048-P2 | HLA-F    | indel | 6  | 29694802  | 29694802  | -         | T   |
| MEN0048-P2 | PASD1    | indel | X  | 150817142 | 150817144 | GCT       | -   |
| MEN0048-P2 | LONRF3   | indel | X  | 118151623 | 118151627 | CCTGG     | -   |
| MEN0048-P2 | SLC25A5  | indel | X  | 118603706 | 118603706 | -         | G   |
| MEN0048-P2 | LRRIQ3   | indel | 1  | 74575212  | 74575212  | -         | T   |
| MEN0048-P2 | KRTAP4-1 | indel | 17 | 39340796  | 39340852  | CGGCAGC/- | -   |
| MEN0048-P2 | AP3S1    | indel | 5  | 115202418 | 115202421 | AAGA      | -   |
| MEN0048-P2 | COG6     | indel | 13 | 40268847  | 40268857  | ATCACCAT  | -   |
| MEN0048-P2 | GOLGA8R  | indel | 15 | 30700168  | 30700168  | -         | TTG |
| MEN0048-P2 | VCP      | indel | 9  | 35059646  | 35059646  | -         | T   |

|            |          |       |    |           |           |           |        |
|------------|----------|-------|----|-----------|-----------|-----------|--------|
| MEN0048-P2 | MCC      | indel | 5  | 112824033 | 112824033 | -         | GCTGCC |
| MEN0048-P2 | RANGAP1  | indel | 22 | 41642641  | 41642641  | C         | -      |
| MEN0048-P2 | MKI67    | indel | 10 | 129905112 | 129905113 | TG        | -      |
| MEN0048-P2 | TNN      | indel | 1  | 175086297 | 175086301 | AGGGG     | -      |
| MEN0048-P2 | CTNND2   | indel | 5  | 11110989  | 11110991  | TTC       | -      |
| MEN0048-P2 | KLHL41   | indel | 2  | 170367102 | 170367103 | AA        | -      |
| MEN0048-P2 | PRG4     | indel | 1  | 186276284 | 186276286 | CTC       | -      |
| MEN0048-P2 | ADAM12   | indel | 10 | 127753380 | 127753381 | CC        | -      |
| MEN0048-P2 | SCAF4    | indel | 21 | 33044257  | 33044259  | GCT       | -      |
| MEN0048-P2 | PASD1    | indel | X  | 150817142 | 150817144 | GCT       | -      |
| MEN0048-P2 | LONRF3   | indel | X  | 118151623 | 118151627 | CCTGG     | -      |
| MEN0048-P2 | CACNA1B  | indel | 9  | 140968025 | 140968027 | TCC       | -      |
| MEN0048-P2 | COG6     | indel | 13 | 40268847  | 40268857  | ATCACCAT  | -      |
| MEN0048-P2 | CRIPAK   | indel | 4  | 1389382   | 1389382   | C         | -      |
| MEN0048-P2 | KIF7     | indel | 15 | 90174936  | 90174936  | G         | -      |
| MEN0048-P2 | OPA1     | indel | 3  | 193332768 | 193332769 | CT        | -      |
| MEN0048-P2 | GAGE2D   | indel | X  | 49208295  | 49208295  | -         | TAT    |
| MEN0048-P2 | GAGE2D   | indel | X  | 49208295  | 49208295  | -         | TAT    |
| MEN0048-P2 | LRRIQ3   | indel | 1  | 74575212  | 74575212  | -         | T      |
| MEN0048-P2 | MCC      | indel | 5  | 112824033 | 112824033 | -         | GCTGCC |
| MEN0048-P2 | HLA-F    | indel | 6  | 29694802  | 29694802  | -         | T      |
| MEN0048-P2 | AP3S1    | indel | 5  | 115202418 | 115202421 | AAGA      | -      |
| MEN0048-P2 | LOXL3    | indel | 2  | 74763923  | 74763923  | -         | C      |
| MEN0048-P2 | SLC9B1   | indel | 4  | 103822483 | 103822484 | AC        | -      |
| MEN0048-P2 | SLC25A5  | indel | X  | 118603706 | 118603706 | -         | G      |
| MEN0048-P2 | GOLGA8R  | indel | 15 | 30700168  | 30700168  | -         | TTG    |
| MEN0048-P2 | BRD7     | indel | 16 | 50368678  | 50368679  | CT        | -      |
| MEN0048-P2 | KLHL41   | indel | 2  | 170367102 | 170367103 | AA        | -      |
| MEN0048-P2 | FCER2    | indel | 19 | 7763700   | 7763700   | C         | -      |
| MEN0048-P2 | CTNND2   | indel | 5  | 11110989  | 11110991  | TTC       | -      |
| MEN0048-P2 | KRTAP4-1 | indel | 17 | 39340796  | 39340852  | CGGCAGC/- | -      |
| MEN0048-P2 | TNN      | indel | 1  | 175086297 | 175086301 | AGGGG     | -      |
| MEN0048-P2 | RANGAP1  | indel | 22 | 41642641  | 41642641  | C         | -      |
| MEN0048-P2 | VCP      | indel | 9  | 35059646  | 35059646  | -         | T      |
| MEN0048-P2 | WNK1     | indel | 12 | 970297    | 970297    | A         | -      |
| MEN0048-P2 | PRG4     | indel | 1  | 186276284 | 186276286 | CTC       | -      |
| MEN0048-P2 | MKI67    | indel | 10 | 129905112 | 129905113 | TG        | -      |
| MEN0048-P2 | ADAM12   | indel | 10 | 127753380 | 127753381 | CC        | -      |
| MEN0048-P2 | SCAF4    | indel | 21 | 33044257  | 33044259  | GCT       | -      |
| MEN0048-P3 | CACNA1B  | indel | 9  | 140968025 | 140968027 | TCC       | -      |
| MEN0048-P3 | PRDM2    | indel | 1  | 14108749  | 14108749  | A         | -      |
| MEN0048-P3 | CRIPAK   | indel | 4  | 1389456   | 1389457   | CA        | -      |
| MEN0048-P3 | HOXD1    | indel | 2  | 177053855 | 177053855 | -         | G      |
| MEN0048-P3 | OR7C1    | indel | 19 | 14910637  | 14910637  | -         | A      |
| MEN0048-P3 | SLC9B1   | indel | 4  | 103822483 | 103822484 | AC        | -      |
| MEN0048-P3 | BRD7     | indel | 16 | 50368678  | 50368679  | CT        | -      |
| MEN0048-P3 | ABL1     | indel | 9  | 133759490 | 133759492 | AAG       | -      |



|            |          |       |    |           |           |            |          |
|------------|----------|-------|----|-----------|-----------|------------|----------|
| MEN0048-P3 | GAGE2D   | indel | X  | 49208295  | 49208295  | -          | TAT      |
| MEN0048-P3 | SEC63    | indel | 6  | 108214755 | 108214755 | T          | -        |
| MEN0048-P3 | OPA1     | indel | 3  | 193332768 | 193332769 | CT         | -        |
| MEN0048-P3 | MYO7A    | indel | 11 | 76915137  | 76915137  | G          | -        |
| MEN0048-P3 | LONRF3   | indel | X  | 118151623 | 118151627 | CCTGG      | -        |
| MEN0048-P3 | BEX3     | indel | X  | 102632402 | 102632402 | -          | A        |
| MEN0048-P3 | SLC25A5  | indel | X  | 118603706 | 118603706 | -          | G        |
| MEN0048-P3 | MIS18BP1 | indel | 14 | 45693722  | 45693722  | T          | -        |
| MEN0048-P3 | KRTAP4-1 | indel | 17 | 39340796  | 39340852  | CGGCAGCA/- | -        |
| MEN0048-P3 | COG6     | indel | 13 | 40268847  | 40268857  | ATCACCAT   | -        |
| MEN0048-P3 | GOLGA8R  | indel | 15 | 30700168  | 30700168  | -          | TTG      |
| MEN0048-P3 | MCC      | indel | 5  | 112824033 | 112824033 | -          | GCTGCC   |
| MEN0048-P3 | KRTAP4-5 | indel | 17 | 39305775  | 39305775  | -          | GGCAGCA/ |
| MEN0048-P3 | KATNB1   | indel | 16 | 57790780  | 57790780  | C          | -        |
| MEN0048-P3 | TNN      | indel | 1  | 175086297 | 175086301 | AGGGG      | -        |
| MEN0048-P3 | PLAC4    | indel | 21 | 42551272  | 42551272  | C          | -        |
| MEN0048-P3 | CTNND2   | indel | 5  | 11110989  | 11110991  | TTC        | -        |
| MEN0048-P3 | KLHL41   | indel | 2  | 170367102 | 170367103 | AA         | -        |
| MEN0048-P3 | PRG4     | indel | 1  | 186276284 | 186276286 | CTC        | -        |
| MEN0048-P3 | ZFHX3    | indel | 16 | 72822564  | 72822566  | TGC        | -        |
| MEN0048-P3 | KRTAP5-5 | indel | 11 | 1651199   | 1651199   | -          | GGCTGTG/ |
| MEN0048-P3 | NAP1L2   | indel | X  | 72433664  | 72433666  | TCC        | -        |
| MEN0048-P3 | ABL1     | indel | 9  | 133759490 | 133759492 | AAG        | -        |
| MEN0048-P3 | HOXD1    | indel | 2  | 177053855 | 177053855 | -          | G        |
| MEN0048-P3 | MYO7A    | indel | 11 | 76915137  | 76915137  | G          | -        |
| MEN0048-P3 | LONRF3   | indel | X  | 118151623 | 118151627 | CCTGG      | -        |
| MEN0048-P3 | PRDM2    | indel | 1  | 14108749  | 14108749  | A          | -        |
| MEN0048-P3 | CACNA1B  | indel | 9  | 140968025 | 140968027 | TCC        | -        |
| MEN0048-P3 | COG6     | indel | 13 | 40268847  | 40268857  | ATCACCAT   | -        |
| MEN0048-P3 | CRIPAK   | indel | 4  | 1389456   | 1389457   | CA         | -        |
| MEN0048-P3 | KATNB1   | indel | 16 | 57790780  | 57790780  | C          | -        |
| MEN0048-P3 | OPA1     | indel | 3  | 193332768 | 193332769 | CT         | -        |
| MEN0048-P3 | GAGE2D   | indel | X  | 49208295  | 49208295  | -          | TAT      |
| MEN0048-P3 | GAGE2D   | indel | X  | 49208295  | 49208295  | -          | TAT      |
| MEN0048-P3 | MCC      | indel | 5  | 112824033 | 112824033 | -          | GCTGCC   |
| MEN0048-P3 | OR7C1    | indel | 19 | 14910637  | 14910637  | -          | A        |
| MEN0048-P3 | SLC9B1   | indel | 4  | 103822483 | 103822484 | AC         | -        |
| MEN0048-P3 | SEC63    | indel | 6  | 108214755 | 108214755 | T          | -        |
| MEN0048-P3 | PLAC4    | indel | 21 | 42551272  | 42551272  | C          | -        |
| MEN0048-P3 | SLC25A5  | indel | X  | 118603706 | 118603706 | -          | G        |
| MEN0048-P3 | GOLGA8R  | indel | 15 | 30700168  | 30700168  | -          | TTG      |
| MEN0048-P3 | BRD7     | indel | 16 | 50368678  | 50368679  | CT         | -        |
| MEN0048-P3 | BEX3     | indel | X  | 102632402 | 102632402 | -          | A        |
| MEN0048-P3 | KRTAP5-5 | indel | 11 | 1651199   | 1651199   | -          | GGCTGTG/ |
| MEN0048-P3 | KLHL41   | indel | 2  | 170367102 | 170367103 | AA         | -        |
| MEN0048-P3 | CTNND2   | indel | 5  | 11110989  | 11110991  | TTC        | -        |
| MEN0048-P3 | KRTAP4-1 | indel | 17 | 39340796  | 39340852  | CGGCAGCA/- | -        |

|             |           |       |    |           |           |           |         |
|-------------|-----------|-------|----|-----------|-----------|-----------|---------|
| MEN0048-P3  | TNN       | indel | 1  | 175086297 | 175086301 | AGGGG     | -       |
| MEN0048-P3  | PRG4      | indel | 1  | 186276284 | 186276286 | CTC       | -       |
| MEN0048-P3  | MIS18BP1  | indel | 14 | 45693722  | 45693722  | T         | -       |
| MEN0048-P3  | NAP1L2    | indel | X  | 72433664  | 72433666  | TCC       | -       |
| MEN0048-P3  | MAMLD1    | indel | X  | 149639325 | 149639327 | CAG       | -       |
| MEN0048-P3  | KRTAP4-5  | indel | 17 | 39305775  | 39305775  | -         | GGCAGCA |
| MEN0048-P3  | ZFH3      | indel | 16 | 72822564  | 72822566  | TGC       | -       |
| MEN0048G-P1 | MMP2      | indel | 16 | 55519638  | 55519638  | A         | -       |
| MEN0048G-P1 | ITGA5     | indel | 12 | 54803327  | 54803327  | -         | C       |
| MEN0048G-P1 | F8        | indel | X  | 154157726 | 154157726 | C         | -       |
| MEN0048G-P1 | OPA1      | indel | 3  | 193332768 | 193332769 | CT        | -       |
| MEN0048G-P1 | DLG3      | indel | X  | 69672596  | 69672599  | GGGA      | -       |
| MEN0048G-P1 | COG6      | indel | 13 | 40268847  | 40268857  | ATCACCAT  | -       |
| MEN0048G-P1 | FANCG     | indel | 9  | 35078290  | 35078290  | C         | -       |
| MEN0048G-P1 | LONRF3    | indel | X  | 118151623 | 118151627 | CCTGG     | -       |
| MEN0048G-P1 | UNC13D    | indel | 17 | 73826552  | 73826554  | GGT       | -       |
| MEN0048G-P1 | DYRK4     | indel | 12 | 4708930   | 4708930   | T         | -       |
| MEN0048G-P1 | TNN       | indel | 1  | 175086297 | 175086301 | AGGGG     | -       |
| MEN0048G-P1 | CCT4      | indel | 2  | 62100237  | 62100254  | GTTCCAAT  | -       |
| MEN0048G-P1 | UHRF1BP1L | indel | 12 | 100452139 | 100452142 | TAAA      | -       |
| MEN0048G-P1 | KLHL41    | indel | 2  | 170367102 | 170367103 | AA        | -       |
| MEN0048G-P1 | MMP2      | indel | 16 | 55519638  | 55519638  | A         | -       |
| MEN0048G-P1 | LONRF3    | indel | X  | 118151623 | 118151627 | CCTGG     | -       |
| MEN0048G-P1 | COG6      | indel | 13 | 40268847  | 40268857  | ATCACCAT  | -       |
| MEN0048G-P1 | OPA1      | indel | 3  | 193332768 | 193332769 | CT        | -       |
| MEN0048G-P1 | UNC13D    | indel | 17 | 73826552  | 73826554  | GGT       | -       |
| MEN0048G-P1 | DYRK4     | indel | 12 | 4708930   | 4708930   | T         | -       |
| MEN0048G-P1 | ITGA5     | indel | 12 | 54803327  | 54803327  | -         | C       |
| MEN0048G-P1 | DLG3      | indel | X  | 69672596  | 69672599  | GGGA      | -       |
| MEN0048G-P1 | F8        | indel | X  | 154157726 | 154157726 | C         | -       |
| MEN0048G-P1 | KLHL41    | indel | 2  | 170367102 | 170367103 | AA        | -       |
| MEN0048G-P1 | CCT4      | indel | 2  | 62100237  | 62100254  | GTTCCAAT  | -       |
| MEN0048G-P1 | CCT4      | indel | 2  | 62100237  | 62100254  | GTTCCAAT  | -       |
| MEN0048G-P1 | FANCG     | indel | 9  | 35078290  | 35078290  | C         | -       |
| MEN0048G-P1 | TNN       | indel | 1  | 175086297 | 175086301 | AGGGG     | -       |
| MEN0048G-P1 | UHRF1BP1L | indel | 12 | 100452139 | 100452142 | TAAA      | -       |
| MEN0088-P   | RICTOR    | indel | 5  | 38967446  | 38967458  | TGGCACG/- | -       |
| MEN0088-P   | CREBBP    | indel | 16 | 3779136   | 3779138   | TGC       | -       |
| MEN0088-P   | FLNA      | indel | X  | 153581266 | 153581266 | C         | -       |
| MEN0088-P   | FCER1A    | indel | 1  | 159277635 | 159277635 | G         | -       |
| MEN0088-P   | TLR2      | indel | 4  | 154625390 | 154625390 | C         | -       |
| MEN0088-P   | ITGB6     | indel | 2  | 160994169 | 160994182 | CACACCCC  | -       |
| MEN0088-P   | UNC13D    | indel | 17 | 73829062  | 73829062  | T         | -       |
| MEN0088-P   | FLNA      | indel | X  | 153581266 | 153581266 | C         | -       |
| MEN0088-P   | TLR2      | indel | 4  | 154625390 | 154625390 | C         | -       |
| MEN0088-P   | UNC13D    | indel | 17 | 73829062  | 73829062  | T         | -       |
| MEN0088-P   | RICTOR    | indel | 5  | 38967446  | 38967458  | TGGCACG/- | -       |

|            |          |       |    |           |           |           |         |
|------------|----------|-------|----|-----------|-----------|-----------|---------|
| MEN0088-P  | CREBBP   | indel | 16 | 3779136   | 3779138   | TGC       | -       |
| MEN0088-P  | FCER1A   | indel | 1  | 159277635 | 159277635 | G         | -       |
| MEN0088-P  | ITGB6    | indel | 2  | 160994169 | 160994182 | CACACCCC- |         |
| MEN0089-P  | KANK3    | indel | 19 | 8399855   | 8399855   | C         | -       |
| MEN0089-P  | RBM43    | indel | 2  | 152108087 | 152108087 | -         | T       |
| MEN0089-P  | COIL     | indel | 17 | 55028117  | 55028117  | -         | T       |
| MEN0089-P  | RBM43    | indel | 2  | 152108087 | 152108087 | -         | T       |
| MEN0089-P  | KANK3    | indel | 19 | 8399855   | 8399855   | C         | -       |
| MEN0089-P  | COIL     | indel | 17 | 55028117  | 55028117  | -         | T       |
| MEN0092-P  | ADAMTS2  | indel | 5  | 178608147 | 178608147 | T         | -       |
| MEN0092-P  | QSOX1    | indel | 1  | 180147959 | 180147959 | A         | -       |
| MEN0092-P  | LDLR     | indel | 19 | 11224276  | 11224276  | C         | -       |
| MEN0092-P  | PRRT1    | indel | 6  | 32118302  | 32118302  | G         | -       |
| MEN0092-P  | TMEM178A | indel | 2  | 39893463  | 39893463  | A         | -       |
| MEN0092-P  | KCNMA1   | indel | 10 | 78729786  | 78729786  | T         | -       |
| MEN0092-P  | SKIDA1   | indel | 10 | 21805466  | 21805466  | -         | CCTCCT  |
| MEN0092-P  | RARG     | indel | 12 | 53606917  | 53606923  | GGAACAT   | -       |
| MEN0092-P  | RARG     | indel | 12 | 53606917  | 53606923  | GGAACAT   | -       |
| MEN0092-P  | LDLR     | indel | 19 | 11224276  | 11224276  | C         | -       |
| MEN0092-P  | QSOX1    | indel | 1  | 180147959 | 180147959 | A         | -       |
| MEN0092-P  | TMEM178A | indel | 2  | 39893463  | 39893463  | A         | -       |
| MEN0092-P  | PRRT1    | indel | 6  | 32118302  | 32118302  | G         | -       |
| MEN0092-P  | ADAMTS2  | indel | 5  | 178608147 | 178608147 | T         | -       |
| MEN0092-P  | KCNMA1   | indel | 10 | 78729786  | 78729786  | T         | -       |
| MEN0092-P  | SKIDA1   | indel | 10 | 21805466  | 21805466  | -         | CCTCCT  |
| MEN0093-P0 | MARCKS   | indel | 6  | 114181210 | 114181210 | A         | -       |
| MEN0093-P0 | STAU2    | indel | 8  | 74507471  | 74507471  | T         | -       |
| MEN0093-P0 | RBM43    | indel | 2  | 152108087 | 152108087 | -         | T       |
| MEN0093-P0 | CRIPAK   | indel | 4  | 1389382   | 1389382   | C         | -       |
| MEN0093-P0 | BRD7     | indel | 16 | 50368678  | 50368679  | CT        | -       |
| MEN0093-P0 | OR7C1    | indel | 19 | 14910637  | 14910637  | -         | A       |
| MEN0093-P0 | CASP5    | indel | 11 | 104879687 | 104879687 | T         | -       |
| MEN0093-P0 | TPTE     | indel | 21 | 10944697  | 10944697  | A         | -       |
| MEN0093-P0 | CDC27    | indel | 17 | 45219612  | 45219612  | A         | -       |
| MEN0093-P0 | POM121   | indel | 7  | 72413723  | 72413723  | -         | CTC     |
| MEN0093-P0 | SLTM     | indel | 15 | 59182564  | 59182565  | CT        | -       |
| MEN0093-P0 | PABPC1   | indel | 8  | 101721933 | 101721933 | T         | -       |
| MEN0093-P0 | DMKN     | indel | 19 | 36002362  | 36002412  | CTGCTGCC- |         |
| MEN0093-P0 | KRTAP4-1 | indel | 17 | 39340796  | 39340852  | CGGCAGC/- |         |
| MEN0093-P0 | KRTAP4-5 | indel | 17 | 39305775  | 39305775  | -         | GGCAGCA |
| MEN0093-P0 | KRT1     | indel | 12 | 53069236  | 53069256  | TAGCTGCT- |         |
| MEN0093-P0 | FSCB     | indel | 14 | 44974154  | 44974154  | -         | GGGGCCT |
| MEN0093-P0 | KRTAP4-3 | indel | 17 | 39324229  | 39324229  | -         | GCAGCAG |
| MEN0093-P0 | KRTAP5-5 | indel | 11 | 1651199   | 1651199   | -         | GGCTGTG |
| MEN0093-P0 | STAU2    | indel | 8  | 74507471  | 74507471  | T         | -       |
| MEN0093-P0 | RBM43    | indel | 2  | 152108087 | 152108087 | -         | T       |
| MEN0093-P0 | CASP5    | indel | 11 | 104879687 | 104879687 | T         | -       |

|            |          |       |    |           |           |           |          |
|------------|----------|-------|----|-----------|-----------|-----------|----------|
| MEN0093-P0 | CRIPAK   | indel | 4  | 1389382   | 1389382   | C         | -        |
| MEN0093-P0 | POM121   | indel | 7  | 72413723  | 72413723  | -         | CTC      |
| MEN0093-P0 | BRD7     | indel | 16 | 50368678  | 50368679  | CT        | -        |
| MEN0093-P0 | PABPC1   | indel | 8  | 101721933 | 101721933 | T         | -        |
| MEN0093-P0 | OR7C1    | indel | 19 | 14910637  | 14910637  | -         | A        |
| MEN0093-P0 | TPTE     | indel | 21 | 10944697  | 10944697  | A         | -        |
| MEN0093-P0 | CADM1    | indel | 11 | 115080312 | 115080314 | TGG       | -        |
| MEN0093-P0 | MARCKS   | indel | 6  | 114181210 | 114181210 | A         | -        |
| MEN0093-P0 | CDC27    | indel | 17 | 45219612  | 45219612  | A         | -        |
| MEN0093-P0 | FSCB     | indel | 14 | 44974154  | 44974154  | -         | GGGGCCTC |
| MEN0093-P0 | KRTAP4-1 | indel | 17 | 39340796  | 39340852  | CGGCAGC/- | -        |
| MEN0093-P0 | KRT1     | indel | 12 | 53069236  | 53069256  | TAGCTGCT- | -        |
| MEN0093-P0 | KRTAP4-3 | indel | 17 | 39324229  | 39324229  | -         | GCAGCAGC |
| MEN0093-P0 | SLTM     | indel | 15 | 59182564  | 59182565  | CT        | -        |
| MEN0093-P0 | DMKN     | indel | 19 | 36002362  | 36002412  | CTGCTGCC- | -        |
| MEN0093-P0 | KRTAP4-5 | indel | 17 | 39305775  | 39305775  | -         | GGCAGCA  |
| MEN0093-P0 | KRTAP5-5 | indel | 11 | 1651199   | 1651199   | -         | GGCTGTGC |
| MEN0093-P1 | PRRC2A   | indel | 6  | 31601735  | 31601735  | G         | -        |
| MEN0093-P1 | BCL10    | indel | 1  | 85736511  | 85736511  | T         | -        |
| MEN0093-P1 | PRDM2    | indel | 1  | 14108749  | 14108749  | A         | -        |
| MEN0093-P1 | GAGE2D   | indel | X  | 49208295  | 49208295  | -         | TAT      |
| MEN0093-P1 | PLCH1    | indel | 3  | 155199981 | 155199987 | TTTGGTT   | -        |
| MEN0093-P1 | MST1L    | indel | 1  | 17086085  | 17086085  | -         | C        |
| MEN0093-P1 | KIAA0907 | indel | 1  | 155886422 | 155886423 | CT        | -        |
| MEN0093-P1 | ACVR2A   | indel | 2  | 148683685 | 148683685 | -         | A        |
| MEN0093-P1 | CASP5    | indel | 11 | 104879687 | 104879687 | T         | -        |
| MEN0093-P1 | BRD7     | indel | 16 | 50368678  | 50368679  | CT        | -        |
| MEN0093-P1 | GPRIN2   | indel | 10 | 46999608  | 46999608  | C         | -        |
| MEN0093-P1 | CDC27    | indel | 17 | 45219612  | 45219612  | A         | -        |
| MEN0093-P1 | KCNN3    | indel | 1  | 154680586 | 154680588 | GCT       | -        |
| MEN0093-P1 | TPTE     | indel | 21 | 10944697  | 10944697  | A         | -        |
| MEN0093-P1 | PABPC1   | indel | 8  | 101721933 | 101721933 | T         | -        |
| MEN0093-P1 | CHD2     | indel | 15 | 93545433  | 93545433  | -         | A        |
| MEN0093-P1 | CCNT1    | indel | 12 | 49087434  | 49087436  | ATG       | -        |
| MEN0093-P1 | GOLGA8R  | indel | 15 | 30700168  | 30700168  | -         | TTG      |
| MEN0093-P1 | POM121   | indel | 7  | 72413723  | 72413723  | -         | CTC      |
| MEN0093-P1 | LRRIQ3   | indel | 1  | 74575212  | 74575212  | -         | T        |
| MEN0093-P1 | ABLIM1   | indel | 10 | 116200799 | 116200799 | -         | A        |
| MEN0093-P1 | SLTM     | indel | 15 | 59182564  | 59182565  | CT        | -        |
| MEN0093-P1 | KRTAP4-1 | indel | 17 | 39340796  | 39340852  | CGGCAGC/- | -        |
| MEN0093-P1 | CD300C   | indel | 17 | 72541045  | 72541045  | -         | G        |
| MEN0093-P1 | KRT1     | indel | 12 | 53069236  | 53069256  | TAGCTGCT- | -        |
| MEN0093-P1 | DMKN     | indel | 19 | 36002362  | 36002412  | CTGCTGCC- | -        |
| MEN0093-P1 | KRTAP4-5 | indel | 17 | 39305775  | 39305775  | -         | GGCAGCA  |
| MEN0093-P1 | SLC51A   | indel | 3  | 195955100 | 195955102 | CTG       | -        |
| MEN0093-P1 | FSCB     | indel | 14 | 44974154  | 44974154  | -         | GGGGCCTC |
| MEN0093-P1 | KRTAP4-3 | indel | 17 | 39324229  | 39324229  | -         | GCAGCAGC |

|            |          |       |    |           |           |           |          |
|------------|----------|-------|----|-----------|-----------|-----------|----------|
| MEN0093-P1 | COIL     | indel | 17 | 55028117  | 55028117  | -         | T        |
| MEN0093-P1 | AATK     | indel | 17 | 79096114  | 79096115  | GC        | -        |
| MEN0093-P1 | LCE1F    | indel | 1  | 152749003 | 152749008 | TGGCTC    | -        |
| MEN0093-P1 | ZMYM5    | indel | 13 | 20426143  | 20426145  | CAT       | -        |
| MEN0093-P1 | PTPN14   | indel | 1  | 214557049 | 214557051 | CCT       | -        |
| MEN0093-P1 | PCDH10   | indel | 4  | 134073569 | 134073571 | CTG       | -        |
| MEN0093-P1 | RSPH6A   | indel | 19 | 46299147  | 46299149  | CCT       | -        |
| MEN0093-P1 | TERF2IP  | indel | 16 | 75690204  | 75690206  | GAA       | -        |
| MEN0093-P1 | CASP5    | indel | 11 | 104879687 | 104879687 | T         | -        |
| MEN0093-P1 | GPRIN2   | indel | 10 | 46999608  | 46999608  | C         | -        |
| MEN0093-P1 | POM121   | indel | 7  | 72413723  | 72413723  | -         | CTC      |
| MEN0093-P1 | PRRC2A   | indel | 6  | 31601735  | 31601735  | G         | -        |
| MEN0093-P1 | BRD7     | indel | 16 | 50368678  | 50368679  | CT        | -        |
| MEN0093-P1 | PABPC1   | indel | 8  | 101721933 | 101721933 | T         | -        |
| MEN0093-P1 | BCL10    | indel | 1  | 85736511  | 85736511  | T         | -        |
| MEN0093-P1 | PRDM2    | indel | 1  | 14108749  | 14108749  | A         | -        |
| MEN0093-P1 | KCNN3    | indel | 1  | 154680586 | 154680588 | GCT       | -        |
| MEN0093-P1 | TPTE     | indel | 21 | 10944697  | 10944697  | A         | -        |
| MEN0093-P1 | ABLIM1   | indel | 10 | 116200799 | 116200799 | -         | A        |
| MEN0093-P1 | AATK     | indel | 17 | 79096114  | 79096115  | GC        | -        |
| MEN0093-P1 | CD300C   | indel | 17 | 72541045  | 72541045  | -         | G        |
| MEN0093-P1 | GAGE2D   | indel | X  | 49208295  | 49208295  | -         | TAT      |
| MEN0093-P1 | KIAA0907 | indel | 1  | 155886422 | 155886423 | CT        | -        |
| MEN0093-P1 | CDC27    | indel | 17 | 45219612  | 45219612  | A         | -        |
| MEN0093-P1 | MST1L    | indel | 1  | 17086085  | 17086085  | -         | C        |
| MEN0093-P1 | PLCH1    | indel | 3  | 155199981 | 155199987 | TTTGGTT   | -        |
| MEN0093-P1 | LRRIQ3   | indel | 1  | 74575212  | 74575212  | -         | T        |
| MEN0093-P1 | ZMYM5    | indel | 13 | 20426143  | 20426145  | CAT       | -        |
| MEN0093-P1 | GOLGA8R  | indel | 15 | 30700168  | 30700168  | -         | TTG      |
| MEN0093-P1 | ACVR2A   | indel | 2  | 148683685 | 148683685 | -         | A        |
| MEN0093-P1 | PTPN14   | indel | 1  | 214557049 | 214557051 | CCT       | -        |
| MEN0093-P1 | FSCB     | indel | 14 | 44974154  | 44974154  | -         | GGGGCCTC |
| MEN0093-P1 | KRTAP4-1 | indel | 17 | 39340796  | 39340852  | CGGCAGC/- | -        |
| MEN0093-P1 | CCNT1    | indel | 12 | 49087434  | 49087436  | ATG       | -        |
| MEN0093-P1 | LCE1F    | indel | 1  | 152749003 | 152749008 | TGGCTC    | -        |
| MEN0093-P1 | COIL     | indel | 17 | 55028117  | 55028117  | -         | T        |
| MEN0093-P1 | PCDH10   | indel | 4  | 134073569 | 134073571 | CTG       | -        |
| MEN0093-P1 | SLC51A   | indel | 3  | 195955100 | 195955102 | CTG       | -        |
| MEN0093-P1 | KRT1     | indel | 12 | 53069236  | 53069256  | TAGCTGCT- | -        |
| MEN0093-P1 | KRTAP4-3 | indel | 17 | 39324229  | 39324229  | -         | GCAGCAGC |
| MEN0093-P1 | SLTM     | indel | 15 | 59182564  | 59182565  | CT        | -        |
| MEN0093-P1 | DMKN     | indel | 19 | 36002362  | 36002412  | CTGCTGCC- | -        |
| MEN0093-P1 | KRTAP4-5 | indel | 17 | 39305775  | 39305775  | -         | GGCAGCA  |
| MEN0093-P1 | TERF2IP  | indel | 16 | 75690204  | 75690206  | GAA       | -        |
| MEN0093-P1 | TSC22D1  | indel | 13 | 45148706  | 45148708  | TGC       | -        |
| MEN0093-P1 | CHD2     | indel | 15 | 93545433  | 93545433  | -         | A        |
| MEN0093-P1 | RSPH6A   | indel | 19 | 46299147  | 46299149  | CCT       | -        |

|            |               |       |    |           |           |            |         |
|------------|---------------|-------|----|-----------|-----------|------------|---------|
| MEN0093-P4 | TDRD6         | indel | 6  | 46660414  | 46660414  | -          | A       |
| MEN0093-P4 | PCNT          | indel | 21 | 47855966  | 47855966  | C          | -       |
| MEN0093-P4 | PEX1          | indel | 7  | 92146721  | 92146721  | T          | -       |
| MEN0093-P4 | SACS          | indel | 13 | 23914687  | 23914687  | T          | -       |
| MEN0093-P4 | CRIPAK        | indel | 4  | 1389382   | 1389382   | C          | -       |
| MEN0093-P4 | KIAA0907      | indel | 1  | 155886422 | 155886423 | CT         | -       |
| MEN0093-P4 | FLG2          | indel | 1  | 152324558 | 152324559 | TG         | -       |
| MEN0093-P4 | BRD7          | indel | 16 | 50368678  | 50368679  | CT         | -       |
| MEN0093-P4 | ZNF233        | indel | 19 | 44777422  | 44777422  | A          | -       |
| MEN0093-P4 | FAR2          | indel | 12 | 29450110  | 29450110  | A          | -       |
| MEN0093-P4 | MOK           | indel | 14 | 102718302 | 102718302 | -          | T       |
| MEN0093-P4 | RBM45         | indel | 2  | 178988920 | 178988920 | A          | -       |
| MEN0093-P4 | TPTE          | indel | 21 | 10944697  | 10944697  | A          | -       |
| MEN0093-P4 | RTN4          | indel | 2  | 55253745  | 55253745  | -          | T       |
| MEN0093-P4 | CCDC30        | indel | 1  | 43002200  | 43002201  | AG         | -       |
| MEN0093-P4 | POM121        | indel | 7  | 72413723  | 72413723  | -          | CTC     |
| MEN0093-P4 | SLTM          | indel | 15 | 59182564  | 59182565  | CT         | -       |
| MEN0093-P4 | PABPC1        | indel | 8  | 101721933 | 101721933 | T          | -       |
| MEN0093-P4 | KCNN3         | indel | 1  | 154680586 | 154680588 | GCT        | -       |
| MEN0093-P4 | CACNA1E       | indel | 1  | 181680102 | 181680103 | AG         | -       |
| MEN0093-P4 | FETUB         | indel | 3  | 186362544 | 186362544 | A          | -       |
| MEN0093-P4 | ABLIM1        | indel | 10 | 116200799 | 116200799 | -          | A       |
| MEN0093-P4 | MLH3          | indel | 14 | 75514604  | 75514604  | T          | -       |
| MEN0093-P4 | TMBIM4        | indel | 12 | 66531936  | 66531936  | -          | A       |
| MEN0093-P4 | ZC3H11A       | indel | 1  | 203786224 | 203786224 | -          | T       |
| MEN0093-P4 | AP3S1         | indel | 5  | 115202418 | 115202421 | AAGA       | -       |
| MEN0093-P4 | SEMG2         | indel | 20 | 43851983  | 43851985  | ACA        | -       |
| MEN0093-P4 | CHD2          | indel | 15 | 93545433  | 93545433  | -          | A       |
| MEN0093-P4 | NDUFC2-KCTD14 | indel | 11 | 77784147  | 77784147  | A          | -       |
| MEN0093-P4 | DMKN          | indel | 19 | 36002362  | 36002412  | CTGCTGCC-  | -       |
| MEN0093-P4 | KRTAP4-1      | indel | 17 | 39340796  | 39340852  | CGGCAGCA/- | -       |
| MEN0093-P4 | ZNF644        | indel | 1  | 91406039  | 91406039  | -          | T       |
| MEN0093-P4 | PHC3          | indel | 3  | 169896635 | 169896637 | TGG        | -       |
| MEN0093-P4 | KRTAP4-5      | indel | 17 | 39305775  | 39305775  | -          | GGCAGCA |
| MEN0093-P4 | KRT1          | indel | 12 | 53069236  | 53069256  | TAGCTGCT-  | -       |
| MEN0093-P4 | UBQLN3        | indel | 11 | 5529918   | 5529920   | TGG        | -       |
| MEN0093-P4 | TMEM63A       | indel | 1  | 226034840 | 226034842 | CTG        | -       |
| MEN0093-P4 | SCN7A         | indel | 2  | 167273429 | 167273430 | TC         | -       |
| MEN0093-P4 | LCE1F         | indel | 1  | 152749003 | 152749008 | TGGCTC     | -       |
| MEN0093-P4 | SLC51A        | indel | 3  | 195955100 | 195955102 | CTG        | -       |
| MEN0093-P4 | MTR           | indel | 1  | 237060393 | 237060393 | -          | TGTG    |
| MEN0093-P4 | SLC8A2        | indel | 19 | 47935681  | 47935683  | TCC        | -       |
| MEN0093-P4 | PLAC4         | indel | 21 | 42551272  | 42551272  | C          | -       |
| MEN0093-P4 | TCHH          | indel | 1  | 152082957 | 152082959 | CTC        | -       |
| MEN0093-P4 | CCNT1         | indel | 12 | 49087434  | 49087436  | ATG        | -       |
| MEN0093-P4 | DBR1          | indel | 3  | 137880741 | 137880743 | TCG        | -       |
| MEN0093-P4 | TOX           | indel | 8  | 59750796  | 59750798  | CTT        | -       |

|            |               |       |    |           |           |      |          |
|------------|---------------|-------|----|-----------|-----------|------|----------|
| MEN0093-P4 | POLE          | indel | 12 | 133220099 | 133220100 | CA   | -        |
| MEN0093-P4 | PCDHA9        | indel | 5  | 140230508 | 140230508 | -    | T        |
| MEN0093-P4 | HMMR          | indel | 5  | 162917425 | 162917425 | -    | A        |
| MEN0093-P4 | ICE2          | indel | 15 | 60745782  | 60745782  | A    | -        |
| MEN0093-P4 | NEFH          | indel | 22 | 29885567  | 29885567  | -    | AAGTCCCC |
| MEN0093-P4 | GRK4          | indel | 4  | 3015470   | 3015470   | A    | -        |
| MEN0093-P4 | GPALPP1       | indel | 13 | 45580365  | 45580367  | GAT  | -        |
| MEN0093-P4 | PAK1          | indel | 11 | 77069990  | 77069992  | CAT  | -        |
| MEN0093-P4 | RSPH6A        | indel | 19 | 46299147  | 46299149  | CCT  | -        |
| MEN0093-P4 | KRTAP5-5      | indel | 11 | 1651199   | 1651199   | -    | GGCTGTGC |
| MEN0093-P4 | SACS          | indel | 13 | 23914687  | 23914687  | T    | -        |
| MEN0093-P4 | SACS          | indel | 13 | 23914687  | 23914687  | T    | -        |
| MEN0093-P4 | SACS          | indel | 13 | 23914687  | 23914687  | T    | -        |
| MEN0093-P4 | MTR           | indel | 1  | 237060393 | 237060393 | -    | TGTG     |
| MEN0093-P4 | ZNF233        | indel | 19 | 44777422  | 44777422  | A    | -        |
| MEN0093-P4 | CRIPAK        | indel | 4  | 1388622   | 1388622   | -    | CA       |
| MEN0093-P4 | POM121        | indel | 7  | 72413723  | 72413723  | -    | CTC      |
| MEN0093-P4 | BRD7          | indel | 16 | 50368678  | 50368679  | CT   | -        |
| MEN0093-P4 | PABPC1        | indel | 8  | 101721933 | 101721933 | T    | -        |
| MEN0093-P4 | NDUFC2-KCTD14 | indel | 11 | 77784147  | 77784147  | A    | -        |
| MEN0093-P4 | PEX1          | indel | 7  | 92146721  | 92146721  | T    | -        |
| MEN0093-P4 | AP3S1         | indel | 5  | 115202418 | 115202421 | AAGA | -        |
| MEN0093-P4 | PHC3          | indel | 3  | 169896635 | 169896637 | TGG  | -        |
| MEN0093-P4 | CACNA1E       | indel | 1  | 181680102 | 181680103 | AG   | -        |
| MEN0093-P4 | KCNN3         | indel | 1  | 154680586 | 154680588 | GCT  | -        |
| MEN0093-P4 | TMBIM4        | indel | 12 | 66531936  | 66531936  | -    | A        |
| MEN0093-P4 | TPTE          | indel | 21 | 10944697  | 10944697  | A    | -        |
| MEN0093-P4 | CADM1         | indel | 11 | 115080312 | 115080314 | TGG  | -        |
| MEN0093-P4 | SLC8A2        | indel | 19 | 47935681  | 47935683  | TCC  | -        |
| MEN0093-P4 | ABLIM1        | indel | 10 | 116200799 | 116200799 | -    | A        |
| MEN0093-P4 | DBR1          | indel | 3  | 137880741 | 137880743 | TCG  | -        |
| MEN0093-P4 | FETUB         | indel | 3  | 186362544 | 186362544 | A    | -        |
| MEN0093-P4 | KIAA0907      | indel | 1  | 155886422 | 155886423 | CT   | -        |
| MEN0093-P4 | FLG2          | indel | 1  | 152324558 | 152324559 | TG   | -        |
| MEN0093-P4 | MLH3          | indel | 14 | 75514604  | 75514604  | T    | -        |
| MEN0093-P4 | ZC3H11A       | indel | 1  | 203786224 | 203786224 | -    | T        |
| MEN0093-P4 | MOK           | indel | 14 | 102718302 | 102718302 | -    | T        |
| MEN0093-P4 | RBM45         | indel | 2  | 178988920 | 178988920 | A    | -        |
| MEN0093-P4 | SCN7A         | indel | 2  | 167273429 | 167273430 | TC   | -        |
| MEN0093-P4 | POLE          | indel | 12 | 133220099 | 133220100 | CA   | -        |
| MEN0093-P4 | TMEM63A       | indel | 1  | 226034840 | 226034842 | CTG  | -        |
| MEN0093-P4 | PCDHA9        | indel | 5  | 140230508 | 140230508 | -    | T        |
| MEN0093-P4 | UBQLN3        | indel | 11 | 5529918   | 5529920   | TGG  | -        |
| MEN0093-P4 | ICE2          | indel | 15 | 60745782  | 60745782  | A    | -        |
| MEN0093-P4 | PCNT          | indel | 21 | 47855966  | 47855966  | C    | -        |
| MEN0093-P4 | TDRD6         | indel | 6  | 46660414  | 46660414  | -    | A        |
| MEN0093-P4 | HMMR          | indel | 5  | 162917425 | 162917425 | -    | A        |

|             |          |       |    |           |           |           |          |
|-------------|----------|-------|----|-----------|-----------|-----------|----------|
| MEN0093-P4  | PLAC4    | indel | 21 | 42551272  | 42551272  | C         | -        |
| MEN0093-P4  | KRTAP4-1 | indel | 17 | 39340796  | 39340852  | CGGCAGC/- |          |
| MEN0093-P4  | CCNT1    | indel | 12 | 49087434  | 49087436  | ATG       | -        |
| MEN0093-P4  | LCE1F    | indel | 1  | 152749003 | 152749008 | TGGCTC    | -        |
| MEN0093-P4  | SEMG2    | indel | 20 | 43851983  | 43851985  | ACA       | -        |
| MEN0093-P4  | CCDC30   | indel | 1  | 43002200  | 43002201  | AG        | -        |
| MEN0093-P4  | GRK4     | indel | 4  | 3015470   | 3015470   | A         | -        |
| MEN0093-P4  | FAR2     | indel | 12 | 29450110  | 29450110  | A         | -        |
| MEN0093-P4  | TCHH     | indel | 1  | 152082957 | 152082959 | CTC       | -        |
| MEN0093-P4  | PAK1     | indel | 11 | 77069990  | 77069992  | CAT       | -        |
| MEN0093-P4  | ZNF644   | indel | 1  | 91406039  | 91406039  | -         | T        |
| MEN0093-P4  | SLC51A   | indel | 3  | 195955100 | 195955102 | CTG       | -        |
| MEN0093-P4  | KRT1     | indel | 12 | 53069236  | 53069256  | TAGCTGCT- |          |
| MEN0093-P4  | SLTM     | indel | 15 | 59182564  | 59182565  | CT        | -        |
| MEN0093-P4  | DMKN     | indel | 19 | 36002362  | 36002412  | CTGCTGCC- |          |
| MEN0093-P4  | KRTAP4-5 | indel | 17 | 39305775  | 39305775  | -         | GGCAGCA  |
| MEN0093-P4  | GPALPP1  | indel | 13 | 45580365  | 45580367  | GAT       | -        |
| MEN0093-P4  | KRTAP5-5 | indel | 11 | 1651199   | 1651199   | -         | GGCTGTGK |
| MEN0093-P4  | CHD2     | indel | 15 | 93545433  | 93545433  | -         | A        |
| MEN0093-P4  | RSPH6A   | indel | 19 | 46299147  | 46299149  | CCT       | -        |
| MEN0093-P4  | NEFH     | indel | 22 | 29885567  | 29885567  | -         | AAGTCCCC |
| MEN0093-P4  | RTN4     | indel | 2  | 55253745  | 55253745  | -         | T        |
| MEN0093-P4  | TOX      | indel | 8  | 59750796  | 59750798  | CTT       | -        |
| MEN0093G-P2 | ABLIM1   | indel | 10 | 116200799 | 116200799 | -         | A        |
| MEN0093G-P2 | ABLIM1   | indel | 10 | 116200799 | 116200799 | -         | A        |
| MEN0095-P   | RRP1     | indel | 21 | 45223401  | 45223402  | GA        | -        |
| MEN0095-P   | SOX11    | indel | 2  | 5833526   | 5833528   | GAC       | -        |
| MEN0095-P   | RRP1     | indel | 21 | 45223401  | 45223402  | GA        | -        |
| MEN0095-P   | SOX11    | indel | 2  | 5833526   | 5833528   | GAC       | -        |
| MEN0096-P   | EPS15L1  | indel | 19 | 16514552  | 16514552  | T         | -        |
| MEN0096-P   | GTF2H3   | indel | 12 | 124144361 | 124144361 | A         | -        |
| MEN0096-P   | CNPY3    | indel | 6  | 42897358  | 42897360  | TGC       | -        |
| MEN0096-P   | EPS15L1  | indel | 19 | 16514552  | 16514552  | T         | -        |
| MEN0096-P   | CNPY3    | indel | 6  | 42897358  | 42897360  | TGC       | -        |
| MEN0096-P   | GTF2H3   | indel | 12 | 124144361 | 124144361 | A         | -        |
| MEN0097-P   | ZNF805   | indel | 19 | 57764455  | 57764455  | C         | -        |
| MEN0097-P   | SFRP1    | indel | 8  | 41166638  | 41166640  | GCT       | -        |
| MEN0097-P   | RAD51AP2 | indel | 2  | 17699325  | 17699325  | -         | G        |
| MEN0097-P   | CDR1     | indel | X  | 139866058 | 139866063 | TTTGGG    | -        |
| MEN0097-P   | USP19    | indel | 3  | 49154334  | 49154334  | G         | -        |
| MEN0097-P   | INO80E   | indel | 16 | 30007665  | 30007665  | A         | -        |
| MEN0097-P   | SETBP1   | indel | 18 | 42281462  | 42281484  | GGCGGAG-  |          |
| MEN0097-P   | SFRP1    | indel | 8  | 41166638  | 41166640  | GCT       | -        |
| MEN0097-P   | CDR1     | indel | X  | 139866058 | 139866063 | TTTGGG    | -        |
| MEN0097-P   | RAD51AP2 | indel | 2  | 17699325  | 17699325  | -         | G        |
| MEN0097-P   | USP19    | indel | 3  | 49154334  | 49154334  | G         | -        |
| MEN0097-P   | ZNF805   | indel | 19 | 57764455  | 57764455  | C         | -        |



|            |         |       |    |           |           |         |        |
|------------|---------|-------|----|-----------|-----------|---------|--------|
| MEN0097-P  | SETBP1  | indel | 18 | 42281462  | 42281484  | GGCGGAG | -      |
| MEN0097-P  | INO80E  | indel | 16 | 30007665  | 30007665  | A       | -      |
| MEN0097-P1 | SOX17   | indel | 8  | 55371874  | 55371875  | CC      | -      |
| MEN0097-P1 | KIF26A  | indel | 14 | 104643204 | 104643204 | C       | -      |
| MEN0097-P1 | KIF26A  | indel | 14 | 104643204 | 104643204 | C       | -      |
| MEN0097-P1 | SGK223  | indel | 8  | 8234868   | 8234868   | -       | GCCGCT |
| MEN0097-P1 | VWF     | indel | 12 | 6078487   | 6078489   | ACC     | -      |
| MEN0097-P1 | SETBP1  | indel | 18 | 42281462  | 42281484  | GGCGGAG | -      |
| MEN0097-P1 | SOX17   | indel | 8  | 55371874  | 55371875  | CC      | -      |
| MEN0097-P1 | VWF     | indel | 12 | 6078487   | 6078489   | ACC     | -      |
| MEN0097-P1 | KIF26A  | indel | 14 | 104643204 | 104643204 | C       | -      |
| MEN0097-P1 | SGK223  | indel | 8  | 8234868   | 8234868   | -       | GCCGCT |
| MEN0097-P1 | SETBP1  | indel | 18 | 42281462  | 42281484  | GGCGGAG | -      |
| MEN0097-P2 | CPXM2   | indel | 10 | 125528165 | 125528167 | CAG     | -      |
| MEN0097-P2 | ARID1A  | indel | 1  | 27106440  | 27106446  | GCACCAC | -      |
| MEN0097-P2 | VWF     | indel | 12 | 6078487   | 6078489   | ACC     | -      |
| MEN0097-P2 | PRB2    | indel | 12 | 11546506  | 11546508  | TTG     | -      |
| MEN0097-P2 | SETBP1  | indel | 18 | 42281462  | 42281484  | GGCGGAG | -      |
| MEN0097-P2 | GOLGA6A | indel | 15 | 74373009  | 74373009  | -       | T      |
| MEN0097-P2 | GZF1    | indel | 20 | 23345921  | 23345923  | GAG     | -      |
| MEN0097-P2 | ARID1A  | indel | 1  | 27106440  | 27106446  | GCACCAC | -      |
| MEN0097-P2 | VWF     | indel | 12 | 6078487   | 6078489   | ACC     | -      |
| MEN0097-P2 | CPXM2   | indel | 10 | 125528165 | 125528167 | CAG     | -      |
| MEN0097-P2 | PRB2    | indel | 12 | 11546506  | 11546508  | TTG     | -      |
| MEN0097-P2 | GOLGA6A | indel | 15 | 74373009  | 74373009  | -       | T      |
| MEN0097-P2 | SETBP1  | indel | 18 | 42281462  | 42281484  | GGCGGAG | -      |
| MEN0097-P2 | GZF1    | indel | 20 | 23345921  | 23345923  | GAG     | -      |
| MEN0097-P3 | CELSR1  | indel | 22 | 46793616  | 46793616  | G       | -      |
| MEN0097-P3 | TMCC1   | indel | 3  | 129370576 | 129370578 | CTG     | -      |
| MEN0097-P3 | ARID1A  | indel | 1  | 27106440  | 27106446  | GCACCAC | -      |
| MEN0097-P3 | VWF     | indel | 12 | 6078487   | 6078489   | ACC     | -      |
| MEN0097-P3 | GOLGA6A | indel | 15 | 74373009  | 74373009  | -       | T      |
| MEN0097-P3 | FOXJ2   | indel | 12 | 8200558   | 8200560   | CAG     | -      |
| MEN0097-P3 | SKIDA1  | indel | 10 | 21805466  | 21805466  | -       | CCTCCT |
| MEN0097-P3 | ARID1A  | indel | 1  | 27106440  | 27106446  | GCACCAC | -      |
| MEN0097-P3 | VWF     | indel | 12 | 6078487   | 6078489   | ACC     | -      |
| MEN0097-P3 | CELSR1  | indel | 22 | 46793616  | 46793616  | G       | -      |
| MEN0097-P3 | TMCC1   | indel | 3  | 129370576 | 129370578 | CTG     | -      |
| MEN0097-P3 | GOLGA6A | indel | 15 | 74373009  | 74373009  | -       | T      |
| MEN0097-P3 | FOXJ2   | indel | 12 | 8200558   | 8200560   | CAG     | -      |
| MEN0097-P3 | SKIDA1  | indel | 10 | 21805466  | 21805466  | -       | CCTCCT |
| MEN0098-P  | SEMA3A  | indel | 7  | 83640525  | 83640525  | C       | -      |
| MEN0098-P  | APEX1   | indel | 14 | 20924856  | 20924856  | -       | T      |
| MEN0098-P  | CDH15   | indel | 16 | 89246676  | 89246676  | G       | -      |
| MEN0098-P  | SEMA3A  | indel | 7  | 83640525  | 83640525  | C       | -      |
| MEN0098-P  | CDH15   | indel | 16 | 89246676  | 89246676  | G       | -      |
| MEN0098-P  | APEX1   | indel | 14 | 20924856  | 20924856  | -       | T      |

|            |         |       |    |           |           |           |        |
|------------|---------|-------|----|-----------|-----------|-----------|--------|
| MEN0099-P  | NF2     | indel | 22 | 30054189  | 30054189  | A         | -      |
| MEN0099-P  | SLX4IP  | indel | 20 | 10603486  | 10603486  | C         | -      |
| MEN0099-P  | INO80E  | indel | 16 | 30016653  | 30016653  | C         | -      |
| MEN0099-P  | SLX4IP  | indel | 20 | 10603486  | 10603486  | C         | -      |
| MEN0099-P  | INO80E  | indel | 16 | 30016653  | 30016653  | C         | -      |
| MEN0099-P  | NF2     | indel | 22 | 30054189  | 30054189  | A         | -      |
| MEN0100-P  | TTC37   | indel | 5  | 94860173  | 94860191  | AGAAAGT(- |        |
| MEN0100-P  | SNTB1   | indel | 8  | 121823722 | 121823728 | CCCAGCT   | -      |
| MEN0100-P  | UBQLN3  | indel | 11 | 5529918   | 5529920   | TGG       | -      |
| MEN0100-P  | ACPT    | indel | 19 | 51293714  | 51293716  | CTG       | -      |
| MEN0100-P  | USP24   | indel | 1  | 55624643  | 55624647  | GATCC     | -      |
| MEN0100-P  | TTC37   | indel | 5  | 94860173  | 94860191  | AGAAAGT(- |        |
| MEN0100-P  | ACPT    | indel | 19 | 51293714  | 51293716  | CTG       | -      |
| MEN0100-P  | USP24   | indel | 1  | 55624643  | 55624647  | GATCC     | -      |
| MEN0100-P  | SNTB1   | indel | 8  | 121823722 | 121823728 | CCCAGCT   | -      |
| MEN0100-P  | UBQLN3  | indel | 11 | 5529918   | 5529920   | TGG       | -      |
| MEN0101-P0 | FGFR4   | indel | 5  | 176522693 | 176522693 | C         | -      |
| MEN0101-P0 | PHRF1   | indel | 11 | 609661    | 609661    | G         | -      |
| MEN0101-P0 | PCBP3   | indel | 21 | 47333903  | 47333903  | G         | -      |
| MEN0101-P0 | PXDC1   | indel | 6  | 3751538   | 3751538   | G         | -      |
| MEN0101-P0 | PRB2    | indel | 12 | 11546506  | 11546508  | TTG       | -      |
| MEN0101-P0 | PHRF1   | indel | 11 | 609661    | 609661    | G         | -      |
| MEN0101-P0 | PCBP3   | indel | 21 | 47333903  | 47333903  | G         | -      |
| MEN0101-P0 | FGFR4   | indel | 5  | 176522693 | 176522693 | C         | -      |
| MEN0101-P0 | PXDC1   | indel | 6  | 3751538   | 3751538   | G         | -      |
| MEN0101-P0 | PRB2    | indel | 12 | 11546506  | 11546508  | TTG       | -      |
| MEN0101-P1 | SCUBE2  | indel | 11 | 9055186   | 9055186   | C         | -      |
| MEN0101-P1 | WDCP    | indel | 2  | 24260552  | 24260552  | A         | -      |
| MEN0101-P1 | ACACA   | indel | 17 | 35614787  | 35614787  | C         | -      |
| MEN0101-P1 | TSC2    | indel | 16 | 2136245   | 2136250   | ACGGAG    | -      |
| MEN0101-P1 | DGAT1   | indel | 8  | 145541209 | 145541215 | CCAGCTT   | -      |
| MEN0101-P1 | OTULIN  | indel | 5  | 14664996  | 14665016  | CGGCGCG(- |        |
| MEN0101-P1 | TRPM3   | indel | 9  | 73167858  | 73167858  | G         | -      |
| MEN0101-P1 | DGAT1   | indel | 8  | 145541209 | 145541215 | CCAGCTT   | -      |
| MEN0101-P1 | WDCP    | indel | 2  | 24260552  | 24260552  | A         | -      |
| MEN0101-P1 | SCUBE2  | indel | 11 | 9055186   | 9055186   | C         | -      |
| MEN0101-P1 | TSC2    | indel | 16 | 2136245   | 2136250   | ACGGAG    | -      |
| MEN0101-P1 | OTULIN  | indel | 5  | 14664996  | 14665016  | CGGCGCG(- |        |
| MEN0101-P1 | TRPM3   | indel | 9  | 73167858  | 73167858  | G         | -      |
| MEN0101-P1 | ACACA   | indel | 17 | 35614787  | 35614787  | C         | -      |
| MEN0102-P  | GAGE2D  | indel | X  | 49208295  | 49208295  | -         | TAT    |
| MEN0102-P  | BRD7    | indel | 16 | 50368678  | 50368679  | CT        | -      |
| MEN0102-P  | NF2     | indel | 22 | 30067844  | 30067844  | G         | -      |
| MEN0102-P  | C9orf43 | indel | 9  | 116187645 | 116187645 | -         | GCA    |
| MEN0102-P  | BHLHE22 | indel | 8  | 65494007  | 65494007  | -         | AGCGGC |
| MEN0102-P  | BRD7    | indel | 16 | 50368678  | 50368679  | CT        | -      |
| MEN0102-P  | GAGE2D  | indel | X  | 49208295  | 49208295  | -         | TAT    |

|           |         |       |    |           |           |      |        |
|-----------|---------|-------|----|-----------|-----------|------|--------|
| MEN0102-P | BHLHE22 | indel | 8  | 65494007  | 65494007  | -    | AGCGGC |
| MEN0102-P | NF2     | indel | 22 | 30067844  | 30067844  | G    | -      |
| MEN0102-P | C9orf43 | indel | 9  | 116187645 | 116187645 | -    | GCA    |
| MEN0103-P | ADCK5   | indel | 8  | 145617535 | 145617535 | G    | -      |
| MEN0103-P | ITGAL   | indel | 16 | 30510513  | 30510513  | -    | C      |
| MEN0103-P | DHX57   | indel | 2  | 39029982  | 39029982  | T    | -      |
| MEN0103-P | PRB2    | indel | 12 | 11546506  | 11546508  | TTG  | -      |
| MEN0103-P | HGFAC   | indel | 4  | 3443798   | 3443800   | CTG  | -      |
| MEN0103-P | FMN2    | indel | 1  | 240255569 | 240255571 | GGC  | -      |
| MEN0103-P | ADCK5   | indel | 8  | 145617535 | 145617535 | G    | -      |
| MEN0103-P | DHX57   | indel | 2  | 39029982  | 39029982  | T    | -      |
| MEN0103-P | ITGAL   | indel | 16 | 30510513  | 30510513  | -    | C      |
| MEN0103-P | HGFAC   | indel | 4  | 3443798   | 3443800   | CTG  | -      |
| MEN0103-P | FMN2    | indel | 1  | 240255569 | 240255571 | GGC  | -      |
| MEN0103-P | PRB2    | indel | 12 | 11546506  | 11546508  | TTG  | -      |
| MEN0104-P | BRAP    | indel | 12 | 112082016 | 112082016 | T    | -      |
| MEN0104-P | FAM155A | indel | 13 | 108518687 | 108518689 | CTG  | -      |
| MEN0104-P | FAM155A | indel | 13 | 108518687 | 108518689 | CTG  | -      |
| MEN0104-P | BRAP    | indel | 12 | 112082016 | 112082016 | T    | -      |
| MEN0106-P | SYNE1   | indel | 6  | 152644769 | 152644769 | T    | -      |
| MEN0106-P | GAGE2D  | indel | X  | 49208295  | 49208295  | -    | TAT    |
| MEN0106-P | GAGE2D  | indel | X  | 49208295  | 49208295  | -    | TAT    |
| MEN0106-P | SYNE1   | indel | 6  | 152644769 | 152644769 | T    | -      |
| MEN0107-P | TPTE    | indel | 21 | 10944697  | 10944697  | A    | -      |
| MEN0107-P | GAGE2D  | indel | X  | 49208295  | 49208295  | -    | TAT    |
| MEN0107-P | TPTE    | indel | 21 | 10944697  | 10944697  | A    | -      |
| MEN0107-P | GAGE2D  | indel | X  | 49208295  | 49208295  | -    | TAT    |
| MEN0108-P | MRGPRF  | indel | 11 | 68772804  | 68772804  | C    | -      |
| MEN0108-P | SREBF2  | indel | 22 | 42262949  | 42262951  | GCA  | -      |
| MEN0108-P | MRGPRF  | indel | 11 | 68772804  | 68772804  | C    | -      |
| MEN0108-P | SREBF2  | indel | 22 | 42262949  | 42262951  | GCA  | -      |
| MEN0109-P | KATNAL2 | indel | 18 | 44627332  | 44627333  | GC   | -      |
| MEN0109-P | UNC119  | indel | 17 | 26879420  | 26879420  | C    | -      |
| MEN0109-P | GOLGB1  | indel | 3  | 121417226 | 121417226 | T    | -      |
| MEN0109-P | KATNAL2 | indel | 18 | 44627332  | 44627333  | GC   | -      |
| MEN0109-P | UNC119  | indel | 17 | 26879420  | 26879420  | C    | -      |
| MEN0109-P | GOLGB1  | indel | 3  | 121417226 | 121417226 | T    | -      |
| MEN0110-P | IRF5    | indel | 7  | 128587491 | 128587491 | TRUE | -      |
| MEN0110-P | IRF5    | indel | 7  | 128587491 | 128587491 | T    | -      |
| MEN0110-P | KCNN3   | indel | 1  | 154842199 | 154842199 | -    | GCTGCT |
| MEN0111-P | EVX2    | indel | 2  | 176945241 | 176945241 | C    | -      |
| MEN0111-P | LMTK3   | indel | 19 | 49001891  | 49001891  | -    | C      |
| MEN0111-P | MUM1    | indel | 19 | 1360803   | 1360804   | GG   | -      |
| MEN0111-P | SPANXN3 | indel | X  | 142605149 | 142605149 | T    | -      |
| MEN0111-P | PASD1   | indel | X  | 150817142 | 150817144 | GCT  | -      |
| MEN0111-P | EFNA5   | indel | 5  | 106723407 | 106723409 | TTG  | -      |
| MEN0111-P | EVX2    | indel | 2  | 176945241 | 176945241 | C    | -      |

|           |             |       |    |           |           |           |     |
|-----------|-------------|-------|----|-----------|-----------|-----------|-----|
| MEN0111-P | PASD1       | indel | X  | 150817142 | 150817144 | GCT       | -   |
| MEN0111-P | LMTK3       | indel | 19 | 49001891  | 49001891  | -         | C   |
| MEN0111-P | EFNA5       | indel | 5  | 106723407 | 106723409 | TTG       | -   |
| MEN0111-P | MUM1        | indel | 19 | 1360803   | 1360804   | GG        | -   |
| MEN0111-P | SPANXN3     | indel | X  | 142605149 | 142605149 | T         | -   |
| MEN0112-P | ATAD2       | indel | 8  | 124368685 | 124368685 | A         | -   |
| MEN0112-P | EDEM1       | indel | 3  | 5248941   | 5248941   | T         | -   |
| MEN0112-P | SLC27A5     | indel | 19 | 59023208  | 59023208  | C         | -   |
| MEN0112-P | PPARGC1B    | indel | 5  | 149216400 | 149216402 | CAG       | -   |
| MEN0112-P | GLTSCR1     | indel | 19 | 48185262  | 48185262  | G         | -   |
| MEN0112-P | FPGT-TNNI3K | indel | 1  | 74957824  | 74957826  | CTT       | -   |
| MEN0112-P | CD99L2      | indel | X  | 149984524 | 149984526 | GTG       | -   |
| MEN0112-P | TOX         | indel | 8  | 59750796  | 59750798  | CTT       | -   |
| MEN0112-P | FPGT-TNNI3K | indel | 1  | 74957824  | 74957826  | CTT       | -   |
| MEN0112-P | ATAD2       | indel | 8  | 124368685 | 124368685 | A         | -   |
| MEN0112-P | GLTSCR1     | indel | 19 | 48185262  | 48185262  | G         | -   |
| MEN0112-P | SLC27A5     | indel | 19 | 59023208  | 59023208  | C         | -   |
| MEN0112-P | EDEM1       | indel | 3  | 5248941   | 5248941   | T         | -   |
| MEN0112-P | PPARGC1B    | indel | 5  | 149216400 | 149216402 | CAG       | -   |
| MEN0112-P | CD99L2      | indel | X  | 149984524 | 149984526 | GTG       | -   |
| MEN0112-P | TOX         | indel | 8  | 59750796  | 59750798  | CTT       | -   |
| MEN0113-P | NF2         | indel | 22 | 30067873  | 30067873  | G         | -   |
| MEN0113-P | SEC31A      | indel | 4  | 83785565  | 83785565  | T         | -   |
| MEN0113-P | ABTB2       | indel | 11 | 34219085  | 34219085  | C         | -   |
| MEN0113-P | CLEC16A     | indel | 16 | 11219957  | 11219966  | CCCCACAG- | -   |
| MEN0113-P | ZDHHC12     | indel | 9  | 131483486 | 131483487 | CC        | -   |
| MEN0113-P | MAST3       | indel | 19 | 18254768  | 18254768  | C         | -   |
| MEN0113-P | ZFR         | indel | 5  | 32419951  | 32419953  | GGT       | -   |
| MEN0113-P | ZDHHC12     | indel | 9  | 131483486 | 131483487 | CC        | -   |
| MEN0113-P | SEC31A      | indel | 4  | 83785565  | 83785565  | T         | -   |
| MEN0113-P | CLEC16A     | indel | 16 | 11219957  | 11219966  | CCCCACAG- | -   |
| MEN0113-P | MAST3       | indel | 19 | 18254768  | 18254768  | C         | -   |
| MEN0113-P | ABTB2       | indel | 11 | 34219085  | 34219085  | C         | -   |
| MEN0113-P | NF2         | indel | 22 | 30067873  | 30067873  | G         | -   |
| MEN0113-P | ZFR         | indel | 5  | 32419951  | 32419953  | GGT       | -   |
| MEN0114-P | FBXO2       | indel | 1  | 11710779  | 11710779  | -         | GCG |
| MEN0114-P | ZFP36L2     | indel | 2  | 43452888  | 43452888  | -         | T   |
| MEN0114-P | TAF1        | indel | X  | 70603000  | 70603000  | A         | -   |
| MEN0114-P | PIEZO1      | indel | 16 | 88800373  | 88800375  | TCC       | -   |
| MEN0114-P | FBXO2       | indel | 1  | 11710779  | 11710779  | -         | GCG |
| MEN0114-P | ZFP36L2     | indel | 2  | 43452888  | 43452888  | -         | T   |
| MEN0114-P | TAF1        | indel | X  | 70603000  | 70603000  | A         | -   |
| MEN0114-P | NR4A3       | indel | 9  | 102590616 | 102590618 | CAC       | -   |
| MEN0114-P | PIEZO1      | indel | 16 | 88800373  | 88800375  | TCC       | -   |
| MEN0116-P | TMCC1       | indel | 3  | 129370576 | 129370578 | CTG       | -   |
| MEN0116-P | BRD7        | indel | 16 | 50368678  | 50368679  | CT        | -   |
| MEN0116-P | GIGYF2      | indel | 2  | 233712228 | 233712230 | CAG       | -   |

|            |          |       |    |           |           |            |     |
|------------|----------|-------|----|-----------|-----------|------------|-----|
| MEN0116-P  | ATXN1    | indel | 6  | 16327913  | 16327915  | TGA        | -   |
| MEN0116-P  | SCAF4    | indel | 21 | 33044257  | 33044259  | GCT        | -   |
| MEN0116-P  | BRD7     | indel | 16 | 50368678  | 50368679  | CT         | -   |
| MEN0116-P  | TMCC1    | indel | 3  | 129370576 | 129370578 | CTG        | -   |
| MEN0116-P  | GIGYF2   | indel | 2  | 233712228 | 233712230 | CAG        | -   |
| MEN0116-P  | SCAF4    | indel | 21 | 33044257  | 33044259  | GCT        | -   |
| MEN0116-P  | ATXN1    | indel | 6  | 16327913  | 16327915  | TGA        | -   |
| MEN0117-P  | KRT76    | indel | 12 | 53162772  | 53162772  | -          | GCT |
| MEN0117-P  | BRD7     | indel | 16 | 50368678  | 50368679  | CT         | -   |
| MEN0117-P  | CHEK2    | indel | 22 | 29091227  | 29091227  | A          | -   |
| MEN0117-P  | ATXN1    | indel | 6  | 16327913  | 16327915  | TGA        | -   |
| MEN0117-P  | FAM155A  | indel | 13 | 108518687 | 108518689 | CTG        | -   |
| MEN0117-P  | SCAF4    | indel | 21 | 33044257  | 33044259  | GCT        | -   |
| MEN0117-P  | PRG4     | indel | 1  | 186275716 | 186275718 | ACT        | -   |
| MEN0117-P  | ZFHX3    | indel | 16 | 72822564  | 72822566  | TGC        | -   |
| MEN0117-P  | KRT76    | indel | 12 | 53162772  | 53162772  | -          | GCT |
| MEN0117-P  | BRD7     | indel | 16 | 50368678  | 50368679  | CT         | -   |
| MEN0117-P  | CHEK2    | indel | 22 | 29091227  | 29091227  | A          | -   |
| MEN0117-P  | SCAF4    | indel | 21 | 33044257  | 33044259  | GCT        | -   |
| MEN0117-P  | ZFHX3    | indel | 16 | 72822564  | 72822566  | TGC        | -   |
| MEN0117-P  | PRG4     | indel | 1  | 186275716 | 186275718 | ACT        | -   |
| MEN0117-P  | FAM155A  | indel | 13 | 108518687 | 108518689 | CTG        | -   |
| MEN0117-P  | TMEM229A | indel | 7  | 123672457 | 123672462 | GCTGCT     | -   |
| MEN0117-P  | ATXN1    | indel | 6  | 16327913  | 16327915  | TGA        | -   |
| MEN0118-P0 | CBLL1    | indel | 7  | 107395909 | 107395909 | A          | -   |
| MEN0118-P0 | SLC1A4   | indel | 2  | 65217006  | 65217006  | T          | -   |
| MEN0118-P0 | NAP1L5   | indel | 4  | 89618484  | 89618486  | TCC        | -   |
| MEN0118-P0 | CBLL1    | indel | 7  | 107395909 | 107395909 | A          | -   |
| MEN0118-P0 | SLC1A4   | indel | 2  | 65217006  | 65217006  | T          | -   |
| MEN0118-P0 | NAP1L5   | indel | 4  | 89618484  | 89618486  | TCC        | -   |
| MEN0118-P0 | TSC22D1  | indel | 13 | 45148706  | 45148708  | TGC        | -   |
| MEN0118-P1 | CEP192   | indel | 18 | 13092454  | 13092480  | GAGAATTC(- | -   |
| MEN0118-P1 | KCTD1    | indel | 18 | 24128262  | 24128264  | TCC        | -   |
| MEN0118-P1 | CEP192   | indel | 18 | 13092454  | 13092480  | GAGAATTC(- | -   |
| MEN0118-P1 | KCTD1    | indel | 18 | 24128262  | 24128264  | TCC        | -   |
| MEN0118-P1 | TSC22D1  | indel | 13 | 45148706  | 45148708  | TGC        | -   |
| MEN0119-P0 | RAPGEF4  | indel | 2  | 173898665 | 173898665 | G          | -   |
| MEN0119-P0 | PSMA1    | indel | 11 | 14529252  | 14529254  | CAT        | -   |
| MEN0119-P0 | RARRES3  | indel | 11 | 63313709  | 63313709  | A          | -   |
| MEN0119-P0 | KCNN3    | indel | 1  | 154680586 | 154680588 | GCT        | -   |
| MEN0119-P0 | GLCCI1   | indel | 7  | 8126097   | 8126099   | CAG        | -   |
| MEN0119-P0 | KCNN2    | indel | 5  | 113698631 | 113698631 | -          | GCC |
| MEN0119-P0 | PRB2     | indel | 12 | 11546506  | 11546508  | TTG        | -   |
| MEN0119-P0 | POU6F2   | indel | 7  | 39379288  | 39379290  | CAG        | -   |
| MEN0119-P0 | KCNN2    | indel | 5  | 113698631 | 113698631 | -          | GCC |
| MEN0119-P0 | RARRES3  | indel | 11 | 63313709  | 63313709  | A          | -   |
| MEN0119-P0 | RAPGEF4  | indel | 2  | 173898665 | 173898665 | G          | -   |

|            |          |       |    |           |           |           |        |
|------------|----------|-------|----|-----------|-----------|-----------|--------|
| MEN0119-P0 | KCNN3    | indel | 1  | 154680586 | 154680588 | GCT       | -      |
| MEN0119-P0 | PSMA1    | indel | 11 | 14529252  | 14529254  | CAT       | -      |
| MEN0119-P0 | GLCCI1   | indel | 7  | 8126097   | 8126099   | CAG       | -      |
| MEN0119-P0 | POU6F2   | indel | 7  | 39379288  | 39379290  | CAG       | -      |
| MEN0119-P0 | PRB2     | indel | 12 | 11546506  | 11546508  | TTG       | -      |
| MEN0119-P1 | ZMYND15  | indel | 17 | 4647712   | 4647712   | G         | -      |
| MEN0119-P1 | ZNF318   | indel | 6  | 43323502  | 43323502  | T         | -      |
| MEN0119-P1 | RAPGEF4  | indel | 2  | 173898665 | 173898665 | G         | -      |
| MEN0119-P1 | LRCH1    | indel | 13 | 47243183  | 47243186  | CCTG      | -      |
| MEN0119-P1 | GATA5    | indel | 20 | 61050249  | 61050249  | C         | -      |
| MEN0119-P1 | OTOF     | indel | 2  | 26705424  | 26705424  | G         | -      |
| MEN0119-P1 | PAXIP1   | indel | 7  | 154760670 | 154760672 | TGC       | -      |
| MEN0119-P1 | ZNF608   | indel | 5  | 124079813 | 124079815 | CTC       | -      |
| MEN0119-P1 | PRB2     | indel | 12 | 11546506  | 11546508  | TTG       | -      |
| MEN0119-P1 | ZNF318   | indel | 6  | 43323502  | 43323502  | T         | -      |
| MEN0119-P1 | RAPGEF4  | indel | 2  | 173898665 | 173898665 | G         | -      |
| MEN0119-P1 | ZMYND15  | indel | 17 | 4647712   | 4647712   | G         | -      |
| MEN0119-P1 | LRCH1    | indel | 13 | 47243183  | 47243186  | CCTG      | -      |
| MEN0119-P1 | GATA5    | indel | 20 | 61050249  | 61050249  | C         | -      |
| MEN0119-P1 | OTOF     | indel | 2  | 26705424  | 26705424  | G         | -      |
| MEN0119-P1 | ZNF608   | indel | 5  | 124079813 | 124079815 | CTC       | -      |
| MEN0119-P1 | PAXIP1   | indel | 7  | 154760670 | 154760672 | TGC       | -      |
| MEN0119-P1 | PRB2     | indel | 12 | 11546506  | 11546508  | TTG       | -      |
| MEN0119-P1 | TMEM229A | indel | 7  | 123672457 | 123672459 | GCT       | -      |
| MEN0120-P  | KLK8     | indel | 19 | 51504365  | 51504365  | C         | -      |
| MEN0120-P  | ATM      | indel | 11 | 108172464 | 108172464 | -         | AACAG  |
| MEN0120-P  | AGAP4    | indel | 10 | 46342668  | 46342688  | GCTCCTGC- |        |
| MEN0120-P  | GAGE2D   | indel | X  | 49208295  | 49208295  | -         | TAT    |
| MEN0120-P  | ZNF729   | indel | 19 | 22497476  | 22497476  | -         | A      |
| MEN0120-P  | SKIDA1   | indel | 10 | 21805466  | 21805466  | -         | CCTCCT |
| MEN0120-P  | AGAP4    | indel | 10 | 46342668  | 46342688  | GCTCCTGC- |        |
| MEN0120-P  | KLK8     | indel | 19 | 51504365  | 51504365  | C         | -      |
| MEN0120-P  | ZNF729   | indel | 19 | 22497476  | 22497476  | -         | A      |
| MEN0120-P  | ATM      | indel | 11 | 108172464 | 108172464 | -         | AACAG  |
| MEN0120-P  | GAGE2D   | indel | X  | 49208295  | 49208295  | -         | TAT    |
| MEN0120-P  | SKIDA1   | indel | 10 | 21805466  | 21805466  | -         | CCTCCT |
| MEN0120-P1 | MPRIP    | indel | 17 | 17061918  | 17061918  | C         | -      |
| MEN0120-P1 | ATM      | indel | 11 | 108172464 | 108172464 | -         | AACAG  |
| MEN0120-P1 | SAPCD2   | indel | 9  | 139959609 | 139959609 | G         | -      |
| MEN0120-P1 | FASN     | indel | 17 | 80039118  | 80039118  | C         | -      |
| MEN0120-P1 | STX12    | indel | 1  | 28099861  | 28099861  | T         | -      |
| MEN0120-P1 | WFIKKN1  | indel | 16 | 684051    | 684051    | G         | -      |
| MEN0120-P1 | ZNF729   | indel | 19 | 22497476  | 22497476  | -         | A      |
| MEN0120-P1 | MPRIP    | indel | 17 | 17061918  | 17061918  | C         | -      |
| MEN0120-P1 | STX12    | indel | 1  | 28099861  | 28099861  | T         | -      |
| MEN0120-P1 | SAPCD2   | indel | 9  | 139959609 | 139959609 | G         | -      |
| MEN0120-P1 | ZNF729   | indel | 19 | 22497476  | 22497476  | -         | A      |

|            |         |       |    |           |           |          |       |
|------------|---------|-------|----|-----------|-----------|----------|-------|
| MEN0120-P1 | ATM     | indel | 11 | 108172464 | 108172464 | -        | AACAG |
| MEN0120-P1 | FASN    | indel | 17 | 80039118  | 80039118  | C        | -     |
| MEN0120-P1 | CADM1   | indel | 11 | 115080312 | 115080314 | TGG      | -     |
| MEN0120-P1 | WFIKKN1 | indel | 16 | 684051    | 684051    | G        | -     |
| MEN0121-P1 | NAE1    | indel | 16 | 66844289  | 66844289  | -        | T     |
| MEN0121-P1 | ASB16   | indel | 17 | 42248186  | 42248186  | C        | -     |
| MEN0121-P1 | RAB3B   | indel | 1  | 52403072  | 52403072  | G        | -     |
| MEN0121-P1 | ZNF728  | indel | 19 | 23158289  | 23158289  | C        | -     |
| MEN0121-P1 | ASB16   | indel | 17 | 42248186  | 42248186  | C        | -     |
| MEN0121-P1 | NAE1    | indel | 16 | 66844289  | 66844289  | -        | T     |
| MEN0121-P1 | ZNF728  | indel | 19 | 23158289  | 23158289  | C        | -     |
| MEN0121-P1 | RAB3B   | indel | 1  | 52403072  | 52403072  | G        | -     |
| MEN0121-P2 | ADGRD1  | indel | 12 | 131439031 | 131439031 | -        | C     |
| MEN0121-P2 | NAE1    | indel | 16 | 66844289  | 66844289  | -        | T     |
| MEN0121-P2 | ZNF544  | indel | 19 | 58758777  | 58758777  | -        | A     |
| MEN0121-P2 | MYL6B   | indel | 12 | 56547773  | 56547775  | CAG      | -     |
| MEN0121-P2 | ADGRD1  | indel | 12 | 131439031 | 131439031 | -        | C     |
| MEN0121-P2 | MYL6B   | indel | 12 | 56547773  | 56547775  | CAG      | -     |
| MEN0121-P2 | NAE1    | indel | 16 | 66844289  | 66844289  | -        | T     |
| MEN0121-P2 | ZNF544  | indel | 19 | 58758777  | 58758777  | -        | A     |
| MEN0121-P3 | NAE1    | indel | 16 | 66844289  | 66844289  | -        | T     |
| MEN0121-P3 | SYCP1   | indel | 1  | 115438125 | 115438125 | G        | -     |
| MEN0121-P3 | ANK2    | indel | 4  | 114214679 | 114214681 | CAC      | -     |
| MEN0121-P3 | PCDHA11 | indel | 5  | 140249857 | 140249864 | CCCACGTT | -     |
| MEN0121-P3 | SCN3A   | indel | 2  | 166003398 | 166003398 | -        | T     |
| MEN0121-P3 | SYCP1   | indel | 1  | 115438125 | 115438125 | G        | -     |
| MEN0121-P3 | NAE1    | indel | 16 | 66844289  | 66844289  | -        | T     |
| MEN0121-P3 | PCDHA11 | indel | 5  | 140249857 | 140249864 | CCCACGTT | -     |
| MEN0121-P3 | ANK2    | indel | 4  | 114214679 | 114214681 | CAC      | -     |
| MEN0121-P3 | SCN3A   | indel | 2  | 166003398 | 166003398 | -        | T     |
| MEN0121-P4 | NAE1    | indel | 16 | 66844289  | 66844289  | -        | T     |
| MEN0121-P4 | SPEF2   | indel | 5  | 35800137  | 35800137  | T        | -     |
| MEN0121-P4 | ULK1    | indel | 12 | 132401547 | 132401547 | G        | -     |
| MEN0121-P4 | SLC25A3 | indel | 12 | 98993827  | 98993828  | AA       | -     |
| MEN0121-P4 | PERM1   | indel | 1  | 915137    | 915137    | C        | -     |
| MEN0121-P4 | RNF213  | indel | 17 | 78313185  | 78313194  | TGGCAGCC | -     |
| MEN0121-P4 | ANK2    | indel | 4  | 114214679 | 114214681 | CAC      | -     |
| MEN0121-P4 | WASF3   | indel | 13 | 27255386  | 27255386  | -        | C     |
| MEN0121-P4 | TRPC6   | indel | 11 | 101341944 | 101341944 | T        | -     |
| MEN0121-P4 | GPANK1  | indel | 6  | 31630207  | 31630207  | G        | -     |
| MEN0121-P4 | SLAIN1  | indel | 13 | 78335213  | 78335230  | GCCTCGAA | -     |
| MEN0121-P4 | PERM1   | indel | 1  | 915137    | 915137    | C        | -     |
| MEN0121-P4 | SPEF2   | indel | 5  | 35800137  | 35800137  | T        | -     |
| MEN0121-P4 | ULK1    | indel | 12 | 132401547 | 132401547 | G        | -     |
| MEN0121-P4 | NAE1    | indel | 16 | 66844289  | 66844289  | -        | T     |
| MEN0121-P4 | SLAIN1  | indel | 13 | 78335213  | 78335230  | GCCTCGAA | -     |
| MEN0121-P4 | TRPC6   | indel | 11 | 101341944 | 101341944 | T        | -     |

|                |         |       |    |           |           |           |    |
|----------------|---------|-------|----|-----------|-----------|-----------|----|
| MEN0121-P4     | SLC25A3 | indel | 12 | 98993827  | 98993828  | AA        | -  |
| MEN0121-P4     | GPANK1  | indel | 6  | 31630207  | 31630207  | G         | -  |
| MEN0121-P4     | RNF213  | indel | 17 | 78313185  | 78313194  | TGGCAGCC- | -  |
| MEN0121-P4     | ANK2    | indel | 4  | 114214679 | 114214681 | CAC       | -  |
| MEN0121-P4     | WASF3   | indel | 13 | 27255386  | 27255386  | -         | C  |
| MEN0122-RBM-P1 | PTPN23  | indel | 3  | 47452580  | 47452580  | C         | -  |
| MEN0122-RBM-P1 | NF2     | indel | 22 | 30032804  | 30032804  | G         | -  |
| MEN0122-RBM-P1 | DISP3   | indel | 1  | 11595128  | 11595128  | C         | -  |
| MEN0122-RBM-P1 | GUCY2F  | indel | X  | 108718643 | 108718643 | C         | -  |
| MEN0122-RBM-P1 | KCNH8   | indel | 3  | 19554728  | 19554728  | C         | -  |
| MEN0122-RBM-P1 | NF2     | indel | 22 | 30032804  | 30032804  | G         | -  |
| MEN0122-RBM-P1 | PTPN23  | indel | 3  | 47452580  | 47452580  | C         | -  |
| MEN0122-RBM-P1 | DISP3   | indel | 1  | 11595128  | 11595128  | C         | -  |
| MEN0122-RBM-P1 | GUCY2F  | indel | X  | 108718643 | 108718643 | C         | -  |
| MEN0122-RBM-P1 | KCNH8   | indel | 3  | 19554728  | 19554728  | C         | -  |
| MEN0122-RBM-P2 | FAM181B | indel | 11 | 82444173  | 82444173  | C         | -  |
| MEN0122-RBM-P2 | NF2     | indel | 22 | 30032804  | 30032804  | G         | -  |
| MEN0122-RBM-P2 | SBNO2   | indel | 19 | 1122154   | 1122154   | T         | -  |
| MEN0122-RBM-P2 | BAP1    | indel | 3  | 52437302  | 52437311  | CCCTTCCC- | -  |
| MEN0122-RBM-P2 | GUCY2F  | indel | X  | 108718643 | 108718643 | C         | -  |
| MEN0122-RBM-P2 | BOD1L1  | indel | 4  | 13605020  | 13605020  | -         | TG |
| MEN0122-RBM-P2 | EXTL1   | indel | 1  | 26349533  | 26349535  | CCT       | -  |
| MEN0122-RBM-P2 | BOD1L1  | indel | 4  | 13605020  | 13605020  | -         | TG |
| MEN0122-RBM-P2 | NF2     | indel | 22 | 30032804  | 30032804  | G         | -  |
| MEN0122-RBM-P2 | EXTL1   | indel | 1  | 26349533  | 26349535  | CCT       | -  |
| MEN0122-RBM-P2 | GUCY2F  | indel | X  | 108718643 | 108718643 | C         | -  |
| MEN0122-RBM-P2 | BAP1    | indel | 3  | 52437302  | 52437311  | CCCTTCCC- | -  |
| MEN0122-RBM-P2 | FAM181B | indel | 11 | 82444173  | 82444173  | C         | -  |
| MEN0122-RBM-P2 | SBNO2   | indel | 19 | 1122154   | 1122154   | T         | -  |
| MEN0122-RBM-P3 | JAKMIP3 | indel | 10 | 133955541 | 133955541 | C         | -  |
| MEN0122-RBM-P3 | NF2     | indel | 22 | 30032804  | 30032804  | G         | -  |
| MEN0122-RBM-P3 | BAP1    | indel | 3  | 52437302  | 52437311  | CCCTTCCC- | -  |
| MEN0122-RBM-P3 | GUCY2F  | indel | X  | 108718643 | 108718643 | C         | -  |
| MEN0122-RBM-P3 | BOD1L1  | indel | 4  | 13605020  | 13605020  | -         | TG |
| MEN0122-RBM-P3 | RCOR2   | indel | 11 | 63679589  | 63679589  | A         | -  |
| MEN0122-RBM-P3 | OLIG1   | indel | 21 | 34442677  | 34442679  | CCT       | -  |
| MEN0122-RBM-P3 | HBS1L   | indel | 6  | 135357714 | 135357714 | T         | -  |
| MEN0122-RBM-P3 | TAF15   | indel | 17 | 34171570  | 34171572  | AGT       | -  |
| MEN0122-RBM-P3 | BOD1L1  | indel | 4  | 13605020  | 13605020  | -         | TG |
| MEN0122-RBM-P3 | NF2     | indel | 22 | 30032804  | 30032804  | G         | -  |
| MEN0122-RBM-P3 | GUCY2F  | indel | X  | 108718643 | 108718643 | C         | -  |
| MEN0122-RBM-P3 | BAP1    | indel | 3  | 52437302  | 52437311  | CCCTTCCC- | -  |
| MEN0122-RBM-P3 | HBS1L   | indel | 6  | 135357714 | 135357714 | T         | -  |
| MEN0122-RBM-P3 | JAKMIP3 | indel | 10 | 133955541 | 133955541 | C         | -  |
| MEN0122-RBM-P3 | OLIG1   | indel | 21 | 34442677  | 34442679  | CCT       | -  |
| MEN0122-RBM-P3 | RCOR2   | indel | 11 | 63679589  | 63679589  | A         | -  |
| MEN0122-RBM-P3 | TAF15   | indel | 17 | 34171570  | 34171572  | AGT       | -  |



|                         |       |    |           |           |            |          |
|-------------------------|-------|----|-----------|-----------|------------|----------|
| MEN0122-RBM-P4 NF2      | indel | 22 | 30032804  | 30032804  | G          | -        |
| MEN0122-RBM-P4 GUCY2F   | indel | X  | 108718643 | 108718643 | C          | -        |
| MEN0122-RBM-P4 BOD1L1   | indel | 4  | 13605020  | 13605020  | -          | TG       |
| MEN0122-RBM-P4 BOD1L1   | indel | 4  | 13605020  | 13605020  | -          | TG       |
| MEN0122-RBM-P4 NF2      | indel | 22 | 30032804  | 30032804  | G          | -        |
| MEN0122-RBM-P4 GUCY2F   | indel | X  | 108718643 | 108718643 | C          | -        |
| MEN0122-RBM-P5 NFAM1    | indel | 22 | 42783070  | 42783070  | G          | -        |
| MEN0122-RBM-P5 PLD4     | indel | 14 | 105398216 | 105398216 | C          | -        |
| MEN0122-RBM-P5 NF2      | indel | 22 | 30032804  | 30032804  | G          | -        |
| MEN0122-RBM-P5 KRTAP9-9 | indel | 17 | 39411670  | 39411670  | -          | ACCTGCTG |
| MEN0122-RBM-P5 BAP1     | indel | 3  | 52437302  | 52437311  | CCCTTCCC,- |          |
| MEN0122-RBM-P5 HRCT1    | indel | 9  | 35906605  | 35906607  | CCG        | -        |
| MEN0122-RBM-P5 GUCY2F   | indel | X  | 108718643 | 108718643 | C          | -        |
| MEN0122-RBM-P5 BOD1L1   | indel | 4  | 13605020  | 13605020  | -          | TG       |
| MEN0122-RBM-P5 BOD1     | indel | 5  | 173043417 | 173043419 | CCG        | -        |
| MEN0122-RBM-P5 BOD1L1   | indel | 4  | 13605020  | 13605020  | -          | TG       |
| MEN0122-RBM-P5 NF2      | indel | 22 | 30032804  | 30032804  | G          | -        |
| MEN0122-RBM-P5 NFAM1    | indel | 22 | 42783070  | 42783070  | G          | -        |
| MEN0122-RBM-P5 GUCY2F   | indel | X  | 108718643 | 108718643 | C          | -        |
| MEN0122-RBM-P5 PLD4     | indel | 14 | 105398216 | 105398216 | C          | -        |
| MEN0122-RBM-P5 BAP1     | indel | 3  | 52437302  | 52437311  | CCCTTCCC,- |          |
| MEN0122-RBM-P5 HRCT1    | indel | 9  | 35906605  | 35906607  | CCG        | -        |
| MEN0122-RBM-P5 KRTAP9-9 | indel | 17 | 39411670  | 39411670  | -          | ACCTGCTG |
| MEN0122-RBM-P5 BOD1     | indel | 5  | 173043417 | 173043419 | CCG        | -        |
| MENex001 AMER1          | indel | X  | 63412973  | 63412973  | C          | -        |
| MENex001 JPH3           | indel | 16 | 87637894  | 87637914  | CTGCTGCT-  |          |
| MENex001 DICER1         | indel | 14 | 95562885  | 95562885  | T          | -        |
| MENex001 CD300A         | indel | 17 | 72469708  | 72469708  | -          | G        |
| MENex001 LOC729159      | indel | 16 | 60392816  | 60392816  | G          | -        |
| MENex001 JPH3           | indel | 16 | 87637894  | 87637914  | CTGCTGCT-  |          |
| MENex001 AMER1          | indel | X  | 63412973  | 63412973  | C          | -        |
| MENex001 CD300A         | indel | 17 | 72469708  | 72469708  | -          | G        |
| MENex001 DICER1         | indel | 14 | 95562885  | 95562885  | T          | -        |
| MENex001 LOC729159      | indel | 16 | 60392816  | 60392816  | G          | -        |
| MENex002 FBXO2          | indel | 1  | 11710779  | 11710779  | -          | GCG      |
| MENex002 FBXO2          | indel | 1  | 11710779  | 11710779  | -          | GCG      |
| MENex004 RABEP1         | indel | 17 | 5266247   | 5266248   | TG         | -        |
| MENex004 RABEP1         | indel | 17 | 5266247   | 5266248   | TG         | -        |
| MENex005 RGPD8          | indel | 2  | 113147266 | 113147268 | TTT        | -        |
| MENex005 CD300C         | indel | 17 | 72541049  | 72541049  | -          | C        |
| MENex005 MRC2           | indel | 17 | 60757561  | 60757561  | -          | ACGACG   |
| MENex005 TAS2R7         | indel | 12 | 10954224  | 10954225  | TA         | -        |
| MENex005 NEFH           | indel | 22 | 29885859  | 29885876  | GCTAAGTC-  |          |
| MENex005 RGPD4          | indel | 2  | 108487715 | 108487717 | AAA        | -        |
| MENex005 CD300C         | indel | 17 | 72541049  | 72541049  | -          | C        |
| MENex005 TAS2R7         | indel | 12 | 10954224  | 10954225  | TA         | -        |
| MENex005 RGPD8          | indel | 2  | 113147266 | 113147268 | TTT        | -        |

|            |            |       |            |           |           |           |        |
|------------|------------|-------|------------|-----------|-----------|-----------|--------|
| MENex005   | RGPD4      | indel | 2          | 108487715 | 108487717 | AAA       | -      |
| MENex005   | MRC2       | indel | 17         | 60757561  | 60757561  | -         | ACGACG |
| MENex005   | NEFH       | indel | 22         | 29885859  | 29885876  | GCTAAGTC- |        |
| MENex006   | MSH3       | indel | 5          | 79950742  | 79950750  | CCCCCAGC- |        |
| MENex006   | MSH3       | indel | 5          | 79950742  | 79950750  | CCCCCAGC- |        |
| MENex006   | CHERP      | indel | 19         | 16640581  | 16640583  | TGC       | -      |
| MENex006   | GOLGA6L2   | indel | 15         | 23685826  | 23685828  | TCT       | -      |
| MEN0030-P0 | MT-ND6     | snp   | MT         | 14178     | 14178     | T         | C      |
| MEN0030-P0 | FAT1       | snp   | 4          | 187630235 | 187630235 | C         | A      |
| MEN0030-P0 | MT-ND5     | snp   | MT         | 13105     | 13105     | A         | G      |
| MEN0030-P0 | AL592183.1 | snp   | 3L000219.1 | 78903     | 78903     | C         | T      |
| MEN0030-P0 | FRG1B      | snp   | 20         | 29624081  | 29624081  | A         | T      |
| MEN0030-P0 | KMT2C      | snp   | 7          | 151962222 | 151962222 | C         | A      |
| MEN0030-P0 | ZAN        | snp   | 7          | 100345257 | 100345257 | G         | A      |
| MEN0030-P0 | MT-CYB     | snp   | MT         | 14769     | 14769     | A         | G      |
| MEN0030-P0 | MT-ND5     | snp   | MT         | 13880     | 13880     | C         | A      |
| MEN0030-P0 | MT-ND5     | snp   | MT         | 13789     | 13789     | T         | C      |
| MEN0030-P0 | RAG1       | snp   | 11         | 36595156  | 36595156  | C         | T      |
| MEN0030-P0 | PRG4       | snp   | 1          | 186275510 | 186275510 | A         | C      |
| MEN0030-P0 | MT-ND5     | snp   | MT         | 14053     | 14053     | A         | G      |
| MEN0030-P0 | PRG4       | snp   | 1          | 186278008 | 186278008 | C         | T      |
| MEN0030-P0 | LRP1B      | snp   | 2          | 141081479 | 141081479 | C         | T      |
| MEN0030-P0 | POTEE      | snp   | 2          | 131976126 | 131976126 | G         | A      |
| MEN0030-P0 | PRG4       | snp   | 1          | 186277568 | 186277568 | C         | T      |
| MEN0030-P0 | CTNNA1     | snp   | 5          | 138147906 | 138147906 | G         | A      |
| MEN0030-P0 | POTEF      | snp   | 2          | 130877871 | 130877871 | C         | G      |
| MEN0030-P0 | KMT2C      | snp   | 7          | 151859495 | 151859495 | C         | G      |
| MEN0030-P0 | RAG1       | snp   | 11         | 36595156  | 36595156  | C         | T      |
| MEN0030-P0 | MT-ND5     | snp   | MT         | 13880     | 13880     | C         | A      |
| MEN0030-P0 | MT-CYB     | snp   | MT         | 14769     | 14769     | A         | G      |
| MEN0030-P0 | POTEE      | snp   | 2          | 131976126 | 131976126 | G         | A      |
| MEN0030-P0 | MT-ND5     | snp   | MT         | 13105     | 13105     | A         | G      |
| MEN0030-P0 | MT-ND5     | snp   | MT         | 13789     | 13789     | T         | C      |
| MEN0030-P0 | LRP1B      | snp   | 2          | 141081479 | 141081479 | C         | T      |
| MEN0030-P0 | FAT1       | snp   | 4          | 187630235 | 187630235 | C         | A      |
| MEN0030-P0 | MT-ND5     | snp   | MT         | 14053     | 14053     | A         | G      |
| MEN0030-P0 | FRG1B      | snp   | 20         | 29624081  | 29624081  | A         | T      |
| MEN0030-P0 | MT-ND6     | snp   | MT         | 14178     | 14178     | T         | C      |
| MEN0030-P0 | ZAN        | snp   | 7          | 100345257 | 100345257 | G         | A      |
| MEN0030-P0 | PRG4       | snp   | 1          | 186275510 | 186275510 | A         | C      |
| MEN0030-P0 | AL592183.1 | snp   | 3L000219.1 | 78903     | 78903     | C         | T      |
| MEN0030-P0 | CTNNA1     | snp   | 5          | 138147906 | 138147906 | G         | A      |
| MEN0030-P0 | KMT2C      | snp   | 7          | 151962222 | 151962222 | C         | A      |
| MEN0030-P0 | POTEF      | snp   | 2          | 130877871 | 130877871 | C         | G      |
| MEN0030-P0 | PRG4       | snp   | 1          | 186278008 | 186278008 | C         | T      |
| MEN0030-P0 | PRG4       | snp   | 1          | 186277568 | 186277568 | C         | T      |
| MEN0030-P0 | KMT2C      | snp   | 7          | 151859495 | 151859495 | C         | G      |

|            |            |     |            |           |           |   |   |
|------------|------------|-----|------------|-----------|-----------|---|---|
| MEN0030-P1 | MT-ND6     | snp | MT         | 14178     | 14178     | T | C |
| MEN0030-P1 | FAT1       | snp | 4          | 187630235 | 187630235 | C | A |
| MEN0030-P1 | POTEF      | snp | 2          | 130877910 | 130877910 | T | A |
| MEN0030-P1 | MT-CYB     | snp | MT         | 14861     | 14861     | G | A |
| MEN0030-P1 | MT-ND5     | snp | MT         | 13105     | 13105     | A | G |
| MEN0030-P1 | AL592183.1 | snp | 3L000219.1 | 78903     | 78903     | C | T |
| MEN0030-P1 | FRG1B      | snp | 20         | 29624081  | 29624081  | A | T |
| MEN0030-P1 | MT-ATP6    | snp | MT         | 8701      | 8701      | A | G |
| MEN0030-P1 | KMT2C      | snp | 7          | 151962222 | 151962222 | C | A |
| MEN0030-P1 | ZAN        | snp | 7          | 100345257 | 100345257 | G | A |
| MEN0030-P1 | MT-CYB     | snp | MT         | 14769     | 14769     | A | G |
| MEN0030-P1 | MT-ND5     | snp | MT         | 13880     | 13880     | C | A |
| MEN0030-P1 | MT-ND5     | snp | MT         | 13789     | 13789     | T | C |
| MEN0030-P1 | RAG1       | snp | 11         | 36595156  | 36595156  | C | T |
| MEN0030-P1 | AKT1       | snp | 14         | 105246551 | 105246551 | C | T |
| MEN0030-P1 | PRG4       | snp | 1          | 186275510 | 186275510 | A | C |
| MEN0030-P1 | MT-ND5     | snp | MT         | 14053     | 14053     | A | G |
| MEN0030-P1 | PRG4       | snp | 1          | 186278008 | 186278008 | C | T |
| MEN0030-P1 | LRP1B      | snp | 2          | 141081479 | 141081479 | C | T |
| MEN0030-P1 | MT-CO1     | snp | MT         | 7389      | 7389      | T | C |
| MEN0030-P1 | POTEE      | snp | 2          | 131976126 | 131976126 | G | A |
| MEN0030-P1 | PRG4       | snp | 1          | 186277568 | 186277568 | C | T |
| MEN0030-P1 | CTNNA1     | snp | 5          | 138147906 | 138147906 | G | A |
| MEN0030-P1 | POTEF      | snp | 2          | 130877871 | 130877871 | C | G |
| MEN0030-P1 | KMT2C      | snp | 7          | 151859495 | 151859495 | C | G |
| MEN0030-P1 | RAG1       | snp | 11         | 36595156  | 36595156  | C | T |
| MEN0030-P1 | MT-ATP6    | snp | MT         | 8701      | 8701      | A | G |
| MEN0030-P1 | AKT1       | snp | 14         | 105246551 | 105246551 | C | T |
| MEN0030-P1 | MT-ND5     | snp | MT         | 13880     | 13880     | C | A |
| MEN0030-P1 | MT-CYB     | snp | MT         | 14769     | 14769     | A | G |
| MEN0030-P1 | POTEE      | snp | 2          | 131976126 | 131976126 | G | A |
| MEN0030-P1 | POTEF      | snp | 2          | 130877938 | 130877938 | C | T |
| MEN0030-P1 | MT-ND5     | snp | MT         | 13105     | 13105     | A | G |
| MEN0030-P1 | MT-ND5     | snp | MT         | 13789     | 13789     | T | C |
| MEN0030-P1 | LRP1B      | snp | 2          | 141081479 | 141081479 | C | T |
| MEN0030-P1 | MT-CYB     | snp | MT         | 14861     | 14861     | G | A |
| MEN0030-P1 | FAT1       | snp | 4          | 187630235 | 187630235 | C | A |
| MEN0030-P1 | MT-ND5     | snp | MT         | 14053     | 14053     | A | G |
| MEN0030-P1 | FRG1B      | snp | 20         | 29624081  | 29624081  | A | T |
| MEN0030-P1 | MT-ND6     | snp | MT         | 14178     | 14178     | T | C |
| MEN0030-P1 | ZAN        | snp | 7          | 100345257 | 100345257 | G | A |
| MEN0030-P1 | PRG4       | snp | 1          | 186275510 | 186275510 | A | C |
| MEN0030-P1 | AL592183.1 | snp | 3L000219.1 | 78903     | 78903     | C | T |
| MEN0030-P1 | CTNNA1     | snp | 5          | 138147906 | 138147906 | G | A |
| MEN0030-P1 | KMT2C      | snp | 7          | 151962222 | 151962222 | C | A |
| MEN0030-P1 | POTEF      | snp | 2          | 130877871 | 130877871 | C | G |
| MEN0030-P1 | POTEF      | snp | 2          | 130877910 | 130877910 | T | A |

|            |            |     |            |           |           |   |   |
|------------|------------|-----|------------|-----------|-----------|---|---|
| MEN0030-P1 | MT-CO1     | snp | MT         | 7389      | 7389      | T | C |
| MEN0030-P1 | PRG4       | snp | 1          | 186278008 | 186278008 | C | T |
| MEN0030-P1 | PRG4       | snp | 1          | 186277568 | 186277568 | C | T |
| MEN0030-P1 | KMT2C      | snp | 7          | 151859495 | 151859495 | C | G |
| MEN0042-P0 | NBPF9      | snp | 1          | 144828707 | 144828707 | G | T |
| MEN0042-P0 | NBPF10     | snp | 1          | 145304613 | 145304613 | T | C |
| MEN0042-P0 | LPAR2      | snp | 19         | 19737520  | 19737520  | C | T |
| MEN0042-P0 | SRGAP1     | snp | 12         | 64383808  | 64383808  | C | T |
| MEN0042-P0 | FRG1B      | snp | 20         | 29623231  | 29623231  | C | T |
| MEN0042-P0 | NBPF10     | snp | 1          | 145296448 | 145296448 | T | A |
| MEN0042-P0 | AL592183.1 | snp | 3L000219.1 | 83290     | 83290     | C | T |
| MEN0042-P0 | ANKRD36    | snp | 2          | 97869931  | 97869931  | A | T |
| MEN0042-P0 | NBPF9      | snp | 1          | 144828683 | 144828683 | C | G |
| MEN0042-P0 | SLC27A5    | snp | 19         | 59011977  | 59011977  | G | A |
| MEN0042-P0 | AC109135.1 | snp | 3L000192.1 | 311344    | 311344    | C | T |
| MEN0042-P0 | FRG1B      | snp | 20         | 29625934  | 29625934  | C | T |
| MEN0042-P0 | ANKRD30B   | snp | 18         | 14779986  | 14779986  | G | A |
| MEN0042-P0 | PCSK5      | snp | 9          | 78790187  | 78790187  | G | C |
| MEN0042-P0 | IGKV1-17   | snp | 2          | 89416981  | 89416981  | C | T |
| MEN0042-P0 | UBR5       | snp | 8          | 103338877 | 103338877 | A | C |
| MEN0042-P0 | MAPK10     | snp | 4          | 87080596  | 87080596  | A | G |
| MEN0042-P0 | ZNF844     | snp | 19         | 12187394  | 12187394  | T | C |
| MEN0042-P0 | STAT6      | snp | 12         | 57493645  | 57493645  | A | C |
| MEN0042-P0 | DHRS3      | snp | 1          | 12640591  | 12640591  | C | T |
| MEN0042-P0 | SWT1       | snp | 1          | 185153955 | 185153955 | C | T |
| MEN0042-P0 | SLC9A5     | snp | 16         | 67289037  | 67289037  | C | G |
| MEN0042-P0 | POTEC      | snp | 18         | 14513675  | 14513675  | T | C |
| MEN0042-P0 | TMIGD1     | snp | 17         | 28651971  | 28651971  | C | T |
| MEN0042-P0 | RREB1      | snp | 6          | 7229893   | 7229893   | A | C |
| MEN0042-P0 | TCP10L2    | snp | 6          | 167591954 | 167591954 | G | A |
| MEN0042-P0 | FLG        | snp | 1          | 152281113 | 152281113 | G | C |
| MEN0042-P0 | SVIL       | snp | 10         | 29770552  | 29770552  | T | G |
| MEN0042-P0 | NBPF9      | snp | 1          | 144828599 | 144828599 | G | A |
| MEN0042-P0 | LYST       | snp | 1          | 235922642 | 235922642 | C | T |
| MEN0042-P0 | FOXP2      | snp | 7          | 114293993 | 114293993 | C | T |
| MEN0042-P0 | TMEM14E    | snp | 3          | 152058521 | 152058521 | C | T |
| MEN0042-P0 | POTEC      | snp | 18         | 14542978  | 14542978  | C | T |
| MEN0042-P0 | FLG        | snp | 1          | 152275960 | 152275960 | T | C |
| MEN0042-P0 | IGF2BP3    | snp | 7          | 23352422  | 23352422  | G | A |
| MEN0042-P0 | NBPF10     | snp | 1          | 145323690 | 145323690 | A | G |
| MEN0042-P0 | SCNN1G     | snp | 16         | 23226732  | 23226732  | G | A |
| MEN0042-P0 | FSCB       | snp | 14         | 44975827  | 44975827  | G | T |
| MEN0042-P0 | MDK        | snp | 11         | 46404331  | 46404331  | C | G |
| MEN0042-P0 | EPN3       | snp | 17         | 48615501  | 48615501  | G | A |
| MEN0042-P0 | SEMA4A     | snp | 1          | 156146507 | 156146507 | A | G |
| MEN0042-P0 | LUZP2      | snp | 11         | 24753676  | 24753676  | G | A |
| MEN0042-P0 | SYNE1      | snp | 6          | 152615187 | 152615187 | C | T |

|            |            |     |            |           |           |   |   |
|------------|------------|-----|------------|-----------|-----------|---|---|
| MEN0042-PO | ZNF71      | snp | 19         | 57133555  | 57133555  | C | G |
| MEN0042-PO | PRB2       | snp | 12         | 11546645  | 11546645  | G | C |
| MEN0042-PO | KRTAP4-11  | snp | 17         | 39274087  | 39274087  | G | C |
| MEN0042-PO | ATXN1      | snp | 6          | 16327897  | 16327897  | C | A |
| MEN0042-PO | PCLO       | snp | 7          | 82784471  | 82784471  | A | G |
| MEN0042-PO | SEMA4A     | snp | 1          | 156146507 | 156146507 | A | G |
| MEN0042-PO | POTEC      | snp | 18         | 14542978  | 14542978  | C | T |
| MEN0042-PO | FOXP2      | snp | 7          | 114293993 | 114293993 | C | T |
| MEN0042-PO | IGKV1-17   | snp | 2          | 89416981  | 89416981  | C | T |
| MEN0042-PO | NBPF9      | snp | 1          | 144828707 | 144828707 | G | T |
| MEN0042-PO | EPN3       | snp | 17         | 48615501  | 48615501  | G | A |
| MEN0042-PO | MDK        | snp | 11         | 46404331  | 46404331  | C | G |
| MEN0042-PO | STAT6      | snp | 12         | 57493645  | 57493645  | A | C |
| MEN0042-PO | SRGAP1     | snp | 12         | 64383808  | 64383808  | C | T |
| MEN0042-PO | LPAR2      | snp | 19         | 19737520  | 19737520  | C | T |
| MEN0042-PO | SWT1       | snp | 1          | 185153955 | 185153955 | C | T |
| MEN0042-PO | FRG1B      | snp | 20         | 29623231  | 29623231  | C | T |
| MEN0042-PO | UBR5       | snp | 8          | 103338877 | 103338877 | A | C |
| MEN0042-PO | MAPK10     | snp | 4          | 87080596  | 87080596  | A | G |
| MEN0042-PO | AC109135.1 | snp | GL000192.1 | 311344    | 311344    | C | T |
| MEN0042-PO | SCNN1G     | snp | 16         | 23226732  | 23226732  | G | A |
| MEN0042-PO | AL592183.1 | snp | GL000219.1 | 83290     | 83290     | C | T |
| MEN0042-PO | DHRS3      | snp | 1          | 12640591  | 12640591  | C | T |
| MEN0042-PO | TMEM14E    | snp | 3          | 152058521 | 152058521 | C | T |
| MEN0042-PO | LUZP2      | snp | 11         | 24753676  | 24753676  | G | A |
| MEN0042-PO | FRG1B      | snp | 20         | 29625934  | 29625934  | C | T |
| MEN0042-PO | NBPF9      | snp | 1          | 144828683 | 144828683 | C | G |
| MEN0042-PO | ZNF844     | snp | 19         | 12187394  | 12187394  | T | C |
| MEN0042-PO | POTEC      | snp | 18         | 14513675  | 14513675  | T | C |
| MEN0042-PO | POTEC      | snp | 18         | 14513675  | 14513675  | T | C |
| MEN0042-PO | IGF2BP3    | snp | 7          | 23352422  | 23352422  | G | A |
| MEN0042-PO | LYST       | snp | 1          | 235922642 | 235922642 | C | T |
| MEN0042-PO | SLC9A5     | snp | 16         | 67289037  | 67289037  | C | G |
| MEN0042-PO | SYNE1      | snp | 6          | 152615187 | 152615187 | C | T |
| MEN0042-PO | PCSK5      | snp | 9          | 78790187  | 78790187  | G | C |
| MEN0042-PO | FSCB       | snp | 14         | 44975827  | 44975827  | G | T |
| MEN0042-PO | RREB1      | snp | 6          | 7229893   | 7229893   | A | C |
| MEN0042-PO | NBPF10     | snp | 1          | 145304613 | 145304613 | T | C |
| MEN0042-PO | NBPF9      | snp | 1          | 144828599 | 144828599 | G | A |
| MEN0042-PO | ANKRD30B   | snp | 18         | 14779986  | 14779986  | G | A |
| MEN0042-PO | FLG        | snp | 1          | 152275960 | 152275960 | T | C |
| MEN0042-PO | FLG        | snp | 1          | 152281113 | 152281113 | G | C |
| MEN0042-PO | NBPF10     | snp | 1          | 145296448 | 145296448 | T | A |
| MEN0042-PO | KRTAP4-11  | snp | 17         | 39274087  | 39274087  | G | C |
| MEN0042-PO | TMIGD1     | snp | 17         | 28651971  | 28651971  | C | T |
| MEN0042-PO | SVIL       | snp | 10         | 29770552  | 29770552  | T | G |
| MEN0042-PO | ZNF71      | snp | 19         | 57133555  | 57133555  | C | G |

|            |            |     |            |           |           |   |   |
|------------|------------|-----|------------|-----------|-----------|---|---|
| MEN0042-P0 | ANKRD36    | snp | 2          | 97869931  | 97869931  | A | T |
| MEN0042-P0 | SLC27A5    | snp | 19         | 59011977  | 59011977  | G | A |
| MEN0042-P0 | NBPF10     | snp | 1          | 145323690 | 145323690 | A | G |
| MEN0042-P0 | PRB2       | snp | 12         | 11546645  | 11546645  | G | C |
| MEN0042-P0 | PCLO       | snp | 7          | 82784471  | 82784471  | A | G |
| MEN0042-P0 | TCP10L2    | snp | 6          | 167591954 | 167591954 | G | A |
| MEN0042-P0 | ATXN1      | snp | 6          | 16327897  | 16327897  | C | A |
| MEN0042-P2 | NBPF9      | snp | 1          | 144828707 | 144828707 | G | T |
| MEN0042-P2 | PLP2       | snp | X          | 49029787  | 49029787  | T | C |
| MEN0042-P2 | LPAR2      | snp | 19         | 19737520  | 19737520  | C | T |
| MEN0042-P2 | CTSW       | snp | 11         | 65649985  | 65649985  | G | A |
| MEN0042-P2 | CRB2       | snp | 9          | 126133531 | 126133531 | C | T |
| MEN0042-P2 | RANBP2     | snp | 2          | 109371685 | 109371685 | A | T |
| MEN0042-P2 | FRG1B      | snp | 20         | 29623231  | 29623231  | C | T |
| MEN0042-P2 | NBPF10     | snp | 1          | 145296448 | 145296448 | T | A |
| MEN0042-P2 | AL592183.1 | snp | 3L000219.1 | 83290     | 83290     | C | T |
| MEN0042-P2 | MRPL45     | snp | 17         | 36453192  | 36453192  | T | G |
| MEN0042-P2 | PRKDC      | snp | 8          | 48794481  | 48794481  | T | C |
| MEN0042-P2 | NBPF9      | snp | 1          | 144828683 | 144828683 | C | G |
| MEN0042-P2 | RANBP2     | snp | 2          | 109352660 | 109352660 | C | T |
| MEN0042-P2 | SLC27A5    | snp | 19         | 59011977  | 59011977  | G | A |
| MEN0042-P2 | PDE1B      | snp | 12         | 54966512  | 54966512  | G | A |
| MEN0042-P2 | SUMF2      | snp | 7          | 56146128  | 56146128  | C | T |
| MEN0042-P2 | PARG       | snp | 10         | 51093329  | 51093329  | C | T |
| MEN0042-P2 | BARD1      | snp | 2          | 215645445 | 215645445 | C | T |
| MEN0042-P2 | ANKRD30B   | snp | 18         | 14779986  | 14779986  | G | A |
| MEN0042-P2 | ADCY4      | snp | 14         | 24799146  | 24799146  | G | A |
| MEN0042-P2 | CILP       | snp | 15         | 65490150  | 65490150  | A | C |
| MEN0042-P2 | PCSK5      | snp | 9          | 78790187  | 78790187  | G | C |
| MEN0042-P2 | CBWD1      | snp | 9          | 121528    | 121528    | G | A |
| MEN0042-P2 | LINGO1     | snp | 15         | 77907606  | 77907606  | G | T |
| MEN0042-P2 | IGKV1-17   | snp | 2          | 89416981  | 89416981  | C | T |
| MEN0042-P2 | KLK15      | snp | 19         | 51331044  | 51331044  | T | G |
| MEN0042-P2 | UBR5       | snp | 8          | 103338877 | 103338877 | A | C |
| MEN0042-P2 | MAPK10     | snp | 4          | 87080596  | 87080596  | A | G |
| MEN0042-P2 | CYP4V2     | snp | 4          | 187126450 | 187126450 | G | A |
| MEN0042-P2 | GON4L      | snp | 1          | 155720514 | 155720514 | C | T |
| MEN0042-P2 | STAT6      | snp | 12         | 57493645  | 57493645  | A | C |
| MEN0042-P2 | CNOT1      | snp | 16         | 58577512  | 58577512  | C | T |
| MEN0042-P2 | DHRS3      | snp | 1          | 12640591  | 12640591  | C | T |
| MEN0042-P2 | SWT1       | snp | 1          | 185153955 | 185153955 | C | T |
| MEN0042-P2 | SLC9A5     | snp | 16         | 67289037  | 67289037  | C | G |
| MEN0042-P2 | TMIGD1     | snp | 17         | 28651971  | 28651971  | C | T |
| MEN0042-P2 | PCDH1      | snp | 5          | 141248193 | 141248193 | G | A |
| MEN0042-P2 | FRG1B      | snp | 20         | 29625947  | 29625947  | T | C |
| MEN0042-P2 | ADAMTS7    | snp | 15         | 79059041  | 79059041  | T | C |
| MEN0042-P2 | RBAK       | snp | 7          | 5103628   | 5103628   | A | T |

|            |           |     |    |           |           |   |   |
|------------|-----------|-----|----|-----------|-----------|---|---|
| MEN0042-P2 | DHX33     | snp | 17 | 5358584   | 5358584   | C | T |
| MEN0042-P2 | TAOK1     | snp | 17 | 27837991  | 27837991  | G | A |
| MEN0042-P2 | SLC1A7    | snp | 1  | 53554566  | 53554566  | G | A |
| MEN0042-P2 | SVIL      | snp | 10 | 29770552  | 29770552  | T | G |
| MEN0042-P2 | BOC       | snp | 3  | 112997000 | 112997000 | G | C |
| MEN0042-P2 | OR1B1     | snp | 9  | 125390908 | 125390908 | C | A |
| MEN0042-P2 | FOXP2     | snp | 7  | 114293993 | 114293993 | C | T |
| MEN0042-P2 | PI4KA     | snp | 22 | 21098962  | 21098962  | G | T |
| MEN0042-P2 | TMEM14E   | snp | 3  | 152058521 | 152058521 | C | T |
| MEN0042-P2 | IRF2      | snp | 4  | 185340717 | 185340717 | C | T |
| MEN0042-P2 | SCNN1G    | snp | 16 | 23226732  | 23226732  | G | A |
| MEN0042-P2 | FSCB      | snp | 14 | 44975827  | 44975827  | G | T |
| MEN0042-P2 | CUBN      | snp | 10 | 16870953  | 16870953  | A | C |
| MEN0042-P2 | KMT2D     | snp | 12 | 49446827  | 49446827  | G | A |
| MEN0042-P2 | MT-ND4    | snp | MT | 12038     | 12038     | A | G |
| MEN0042-P2 | KMT2C     | snp | 7  | 151970940 | 151970940 | A | G |
| MEN0042-P2 | SEMA4A    | snp | 1  | 156146507 | 156146507 | A | G |
| MEN0042-P2 | LUZP2     | snp | 11 | 24753676  | 24753676  | G | A |
| MEN0042-P2 | ZNF71     | snp | 19 | 57133555  | 57133555  | C | G |
| MEN0042-P2 | PRB2      | snp | 12 | 11546645  | 11546645  | G | C |
| MEN0042-P2 | KRTAP4-11 | snp | 17 | 39274087  | 39274087  | G | C |
| MEN0042-P2 | ZNF99     | snp | 19 | 22939101  | 22939101  | C | T |
| MEN0042-P2 | ZNF429    | snp | 19 | 21720452  | 21720452  | G | A |
| MEN0042-P2 | KRTAP5-10 | snp | 11 | 71276851  | 71276851  | A | G |
| MEN0042-P2 | TTN       | snp | 2  | 179424506 | 179424506 | T | G |
| MEN0042-P2 | PCLO      | snp | 7  | 82784471  | 82784471  | A | G |
| MEN0042-P2 | LINGO1    | snp | 15 | 77907606  | 77907606  | G | T |
| MEN0042-P2 | SEMA4A    | snp | 1  | 156146507 | 156146507 | A | G |
| MEN0042-P2 | PI4KA     | snp | 22 | 21098962  | 21098962  | G | T |
| MEN0042-P2 | FOXP2     | snp | 7  | 114293993 | 114293993 | C | T |
| MEN0042-P2 | IGKV1-17  | snp | 2  | 89416981  | 89416981  | C | T |
| MEN0042-P2 | NBPF9     | snp | 1  | 144828707 | 144828707 | G | T |
| MEN0042-P2 | ADCY4     | snp | 14 | 24799146  | 24799146  | G | A |
| MEN0042-P2 | KMT2C     | snp | 7  | 151970940 | 151970940 | A | G |
| MEN0042-P2 | STAT6     | snp | 12 | 57493645  | 57493645  | A | C |
| MEN0042-P2 | ZNF429    | snp | 19 | 21720452  | 21720452  | G | A |
| MEN0042-P2 | CNOT1     | snp | 16 | 58577512  | 58577512  | C | T |
| MEN0042-P2 | CILP      | snp | 15 | 65490150  | 65490150  | A | C |
| MEN0042-P2 | LPAR2     | snp | 19 | 19737520  | 19737520  | C | T |
| MEN0042-P2 | SWT1      | snp | 1  | 185153955 | 185153955 | C | T |
| MEN0042-P2 | FRG1B     | snp | 20 | 29623231  | 29623231  | C | T |
| MEN0042-P2 | UBR5      | snp | 8  | 103338877 | 103338877 | A | C |
| MEN0042-P2 | MT-ND4    | snp | MT | 12038     | 12038     | A | G |
| MEN0042-P2 | CRB2      | snp | 9  | 126133531 | 126133531 | C | T |
| MEN0042-P2 | DHX33     | snp | 17 | 5358584   | 5358584   | C | T |
| MEN0042-P2 | PRKDC     | snp | 8  | 48794481  | 48794481  | T | C |
| MEN0042-P2 | TTN       | snp | 2  | 179424506 | 179424506 | T | G |

|             |            |     |            |           |           |   |   |
|-------------|------------|-----|------------|-----------|-----------|---|---|
| MEN0042-P2  | CTSW       | snp | 11         | 65649985  | 65649985  | G | A |
| MEN0042-P2  | CBWD1      | snp | 9          | 121528    | 121528    | G | A |
| MEN0042-P2  | RANBP2     | snp | 2          | 109352660 | 109352660 | C | T |
| MEN0042-P2  | MAPK10     | snp | 4          | 87080596  | 87080596  | A | G |
| MEN0042-P2  | SCNN1G     | snp | 16         | 23226732  | 23226732  | G | A |
| MEN0042-P2  | AL592183.1 | snp | 3L000219.1 | 83290     | 83290     | C | T |
| MEN0042-P2  | OR1B1      | snp | 9          | 125390908 | 125390908 | C | A |
| MEN0042-P2  | CUBN       | snp | 10         | 16870953  | 16870953  | A | C |
| MEN0042-P2  | BARD1      | snp | 2          | 215645445 | 215645445 | C | T |
| MEN0042-P2  | DHRS3      | snp | 1          | 12640591  | 12640591  | C | T |
| MEN0042-P2  | BOC        | snp | 3          | 112997000 | 112997000 | G | C |
| MEN0042-P2  | MRPL45     | snp | 17         | 36453192  | 36453192  | T | G |
| MEN0042-P2  | TMEM14E    | snp | 3          | 152058521 | 152058521 | C | T |
| MEN0042-P2  | ADAMTS7    | snp | 15         | 79059041  | 79059041  | T | C |
| MEN0042-P2  | PLP2       | snp | X          | 49029787  | 49029787  | T | C |
| MEN0042-P2  | KMT2D      | snp | 12         | 49446827  | 49446827  | G | A |
| MEN0042-P2  | GON4L      | snp | 1          | 155720514 | 155720514 | C | T |
| MEN0042-P2  | SLC1A7     | snp | 1          | 53554566  | 53554566  | G | A |
| MEN0042-P2  | LUZP2      | snp | 11         | 24753676  | 24753676  | G | A |
| MEN0042-P2  | NBPF9      | snp | 1          | 144828683 | 144828683 | C | G |
| MEN0042-P2  | PARG       | snp | 10         | 51093329  | 51093329  | C | T |
| MEN0042-P2  | RANBP2     | snp | 2          | 109371685 | 109371685 | A | T |
| MEN0042-P2  | KLK15      | snp | 19         | 51331044  | 51331044  | T | G |
| MEN0042-P2  | PDE1B      | snp | 12         | 54966512  | 54966512  | G | A |
| MEN0042-P2  | SLC9A5     | snp | 16         | 67289037  | 67289037  | C | G |
| MEN0042-P2  | SUMF2      | snp | 7          | 56146128  | 56146128  | C | T |
| MEN0042-P2  | IRF2       | snp | 4          | 185340717 | 185340717 | C | T |
| MEN0042-P2  | PCSK5      | snp | 9          | 78790187  | 78790187  | G | C |
| MEN0042-P2  | FSCB       | snp | 14         | 44975827  | 44975827  | G | T |
| MEN0042-P2  | RBAK       | snp | 7          | 5103628   | 5103628   | A | T |
| MEN0042-P2  | ANKRD30B   | snp | 18         | 14779986  | 14779986  | G | A |
| MEN0042-P2  | NBPF10     | snp | 1          | 145296448 | 145296448 | T | A |
| MEN0042-P2  | TAOK1      | snp | 17         | 27837991  | 27837991  | G | A |
| MEN0042-P2  | ZNF99      | snp | 19         | 22939101  | 22939101  | C | T |
| MEN0042-P2  | KRTAP4-11  | snp | 17         | 39274087  | 39274087  | G | C |
| MEN0042-P2  | TMIGD1     | snp | 17         | 28651971  | 28651971  | C | T |
| MEN0042-P2  | PCDH1      | snp | 5          | 141248193 | 141248193 | G | A |
| MEN0042-P2  | SVIL       | snp | 10         | 29770552  | 29770552  | T | G |
| MEN0042-P2  | ZNF71      | snp | 19         | 57133555  | 57133555  | C | G |
| MEN0042-P2  | SLC27A5    | snp | 19         | 59011977  | 59011977  | G | A |
| MEN0042-P2  | FRG1B      | snp | 20         | 29625947  | 29625947  | T | C |
| MEN0042-P2  | CYP4V2     | snp | 4          | 187126450 | 187126450 | G | A |
| MEN0042-P2  | PRB2       | snp | 12         | 11546645  | 11546645  | G | C |
| MEN0042-P2  | PCLO       | snp | 7          | 82784471  | 82784471  | A | G |
| MEN0042-P2  | KRTAP5-10  | snp | 11         | 71276851  | 71276851  | A | G |
| MEN0042G-P1 | OR2T34     | snp | 1          | 248737419 | 248737419 | T | C |
| MEN0042G-P1 | LPAR2      | snp | 19         | 19737520  | 19737520  | C | T |



|             |            |     |            |           |           |   |   |
|-------------|------------|-----|------------|-----------|-----------|---|---|
| MEN0042G-P1 | PDXDC1     | snp | 16         | 15100351  | 15100351  | G | A |
| MEN0042G-P1 | ANKRD18A   | snp | 9          | 38588630  | 38588630  | G | C |
| MEN0042G-P1 | SLC27A5    | snp | 19         | 59011977  | 59011977  | G | A |
| MEN0042G-P1 | ZNF582     | snp | 19         | 56896215  | 56896215  | C | T |
| MEN0042G-P1 | IGKV1-17   | snp | 2          | 89416981  | 89416981  | C | T |
| MEN0042G-P1 | UBR5       | snp | 8          | 103338877 | 103338877 | A | C |
| MEN0042G-P1 | MAPK10     | snp | 4          | 87080596  | 87080596  | A | G |
| MEN0042G-P1 | STAT6      | snp | 12         | 57493645  | 57493645  | A | C |
| MEN0042G-P1 | DHRS3      | snp | 1          | 12640591  | 12640591  | C | T |
| MEN0042G-P1 | SWT1       | snp | 1          | 185153955 | 185153955 | C | T |
| MEN0042G-P1 | SLC9A5     | snp | 16         | 67289037  | 67289037  | C | G |
| MEN0042G-P1 | NBPF24     | snp | 1          | 147580791 | 147580791 | T | C |
| MEN0042G-P1 | TMIGD1     | snp | 17         | 28651971  | 28651971  | C | T |
| MEN0042G-P1 | SVIL       | snp | 10         | 29770552  | 29770552  | T | G |
| MEN0042G-P1 | FOXP2      | snp | 7          | 114293993 | 114293993 | C | T |
| MEN0042G-P1 | TMEM14E    | snp | 3          | 152058521 | 152058521 | C | T |
| MEN0042G-P1 | NPIPB6     | snp | 16         | 28354418  | 28354418  | C | T |
| MEN0042G-P1 | SCNN1G     | snp | 16         | 23226732  | 23226732  | G | A |
| MEN0042G-P1 | FSCB       | snp | 14         | 44975827  | 44975827  | G | T |
| MEN0042G-P1 | ZAN        | snp | 7          | 100350126 | 100350126 | G | A |
| MEN0042G-P1 | AL356585.1 | snp | 3L000212.1 | 64910     | 64910     | A | C |
| MEN0042G-P1 | LUZP2      | snp | 11         | 24753676  | 24753676  | G | A |
| MEN0042G-P1 | ZNF71      | snp | 19         | 57133555  | 57133555  | C | G |
| MEN0042G-P1 | PRG4       | snp | 1          | 186276040 | 186276040 | G | T |
| MEN0042G-P1 | FOXP2      | snp | 7          | 114293993 | 114293993 | C | T |
| MEN0042G-P1 | IGKV1-17   | snp | 2          | 89416981  | 89416981  | C | T |
| MEN0042G-P1 | ANKRD18A   | snp | 9          | 38588630  | 38588630  | G | C |
| MEN0042G-P1 | ANKRD18A   | snp | 9          | 38588630  | 38588630  | G | C |
| MEN0042G-P1 | NPIPB6     | snp | 16         | 28354418  | 28354418  | C | T |
| MEN0042G-P1 | PDXDC1     | snp | 16         | 15100351  | 15100351  | G | A |
| MEN0042G-P1 | STAT6      | snp | 12         | 57493645  | 57493645  | A | C |
| MEN0042G-P1 | OR2T34     | snp | 1          | 248737419 | 248737419 | T | C |
| MEN0042G-P1 | LPAR2      | snp | 19         | 19737520  | 19737520  | C | T |
| MEN0042G-P1 | SWT1       | snp | 1          | 185153955 | 185153955 | C | T |
| MEN0042G-P1 | UBR5       | snp | 8          | 103338877 | 103338877 | A | C |
| MEN0042G-P1 | MAPK10     | snp | 4          | 87080596  | 87080596  | A | G |
| MEN0042G-P1 | AL356585.1 | snp | 3L000212.1 | 64910     | 64910     | A | C |
| MEN0042G-P1 | SCNN1G     | snp | 16         | 23226732  | 23226732  | G | A |
| MEN0042G-P1 | DHRS3      | snp | 1          | 12640591  | 12640591  | C | T |
| MEN0042G-P1 | NBPF24     | snp | 1          | 147580791 | 147580791 | T | C |
| MEN0042G-P1 | ZNF582     | snp | 19         | 56896215  | 56896215  | C | T |
| MEN0042G-P1 | TMEM14E    | snp | 3          | 152058521 | 152058521 | C | T |
| MEN0042G-P1 | LUZP2      | snp | 11         | 24753676  | 24753676  | G | A |
| MEN0042G-P1 | SLC9A5     | snp | 16         | 67289037  | 67289037  | C | G |
| MEN0042G-P1 | FSCB       | snp | 14         | 44975827  | 44975827  | G | T |
| MEN0042G-P1 | TMIGD1     | snp | 17         | 28651971  | 28651971  | C | T |
| MEN0042G-P1 | SVIL       | snp | 10         | 29770552  | 29770552  | T | G |

|             |         |     |    |           |           |      |   |
|-------------|---------|-----|----|-----------|-----------|------|---|
| MEN0042G-P1 | ZNF71   | snp | 19 | 57133555  | 57133555  | C    | G |
| MEN0042G-P1 | SLC27A5 | snp | 19 | 59011977  | 59011977  | G    | A |
| MEN0042G-P1 | ZAN     | snp | 7  | 100350126 | 100350126 | G    | A |
| MEN0042G-P1 | PRG4    | snp | 1  | 186276040 | 186276040 | G    | T |
| MEN0045-P0  | RGPD3   | snp | 2  | 107049681 | 107049681 | TRUE | C |
| MEN0045-P0  | RGPD3   | snp | 2  | 107049681 | 107049681 | TRUE | C |
| MEN0045-P1  | MYH1    | snp | 17 | 10412854  | 10412854  | G    | A |
| MEN0045-P1  | RGPD3   | snp | 2  | 107049681 | 107049681 | T    | C |
| MEN0045-P1  | MYH1    | snp | 17 | 10412854  | 10412854  | G    | A |
| MEN0045-P1  | RGPD3   | snp | 2  | 107049681 | 107049681 | T    | C |
| MEN0045-P2  | RGPD3   | snp | 2  | 107049681 | 107049681 | T    | C |
| MEN0045-P2  | PTCH1   | snp | 9  | 98268727  | 98268727  | G    | A |
| MEN0045-P2  | PTCH1   | snp | 9  | 98268727  | 98268727  | G    | A |
| MEN0045-P2  | RGPD3   | snp | 2  | 107049681 | 107049681 | T    | C |
| MEN0045-P3  | LRP2    | snp | 2  | 170092519 | 170092519 | A    | C |
| MEN0045-P3  | KMT2C   | snp | 7  | 151875009 | 151875009 | A    | C |
| MEN0045-P3  | KMT2C   | snp | 7  | 151875009 | 151875009 | A    | C |
| MEN0045-P3  | LRP2    | snp | 2  | 170092519 | 170092519 | A    | C |
| MEN0045-P4  | FLNB    | snp | 3  | 58124189  | 58124189  | C    | G |
| MEN0045-P4  | FLNB    | snp | 3  | 58124189  | 58124189  | C    | G |
| MEN0048-P0  | MAL     | snp | 2  | 95719159  | 95719159  | G    | T |
| MEN0048-P0  | BMS1    | snp | 10 | 43318566  | 43318566  | G    | A |
| MEN0048-P0  | DAXX    | snp | 6  | 33289272  | 33289272  | G    | A |
| MEN0048-P0  | FAM47A  | snp | X  | 34149266  | 34149266  | G    | A |
| MEN0048-P0  | RAB33A  | snp | X  | 129318346 | 129318346 | G    | A |
| MEN0048-P0  | RHPN2   | snp | 19 | 33493188  | 33493188  | T    | A |
| MEN0048-P0  | TEX101  | snp | 19 | 43922422  | 43922422  | C    | T |
| MEN0048-P0  | NBPF9   | snp | 1  | 144828707 | 144828707 | G    | T |
| MEN0048-P0  | CHP2    | snp | 16 | 23767187  | 23767187  | A    | T |
| MEN0048-P0  | ATP6V1H | snp | 8  | 54708292  | 54708292  | C    | T |
| MEN0048-P0  | RHPN2   | snp | 19 | 33493201  | 33493201  | C    | T |
| MEN0048-P0  | ELTD1   | snp | 1  | 79357261  | 79357261  | T    | C |
| MEN0048-P0  | NBPF10  | snp | 1  | 145302745 | 145302745 | A    | T |
| MEN0048-P0  | NBPF10  | snp | 1  | 145296448 | 145296448 | T    | A |
| MEN0048-P0  | MUC16   | snp | 19 | 9056757   | 9056757   | G    | T |
| MEN0048-P0  | BTK     | snp | X  | 100609669 | 100609669 | C    | G |
| MEN0048-P0  | EVPL    | snp | 17 | 74003956  | 74003956  | G    | A |
| MEN0048-P0  | STON2   | snp | 14 | 81744954  | 81744954  | G    | T |
| MEN0048-P0  | NRSN1   | snp | 6  | 24146146  | 24146146  | A    | G |
| MEN0048-P0  | ZNF208  | snp | 19 | 22155114  | 22155114  | C    | T |
| MEN0048-P0  | MPP1    | snp | X  | 154020552 | 154020552 | C    | A |
| MEN0048-P0  | SOWAHD  | snp | X  | 118893556 | 118893556 | T    | G |
| MEN0048-P0  | TBC1D14 | snp | 4  | 6925486   | 6925486   | G    | A |
| MEN0048-P0  | CRAMP1L | snp | 16 | 1705221   | 1705221   | A    | G |
| MEN0048-P0  | EGR1    | snp | 5  | 137803490 | 137803490 | C    | T |
| MEN0048-P0  | GPR113  | snp | 2  | 26536256  | 26536256  | T    | A |
| MEN0048-P0  | PRPF6   | snp | 20 | 62630479  | 62630479  | G    | A |

|            |          |     |    |           |           |   |   |
|------------|----------|-----|----|-----------|-----------|---|---|
| MEN0048-PO | SLC26A11 | snp | 17 | 78210753  | 78210753  | G | A |
| MEN0048-PO | FZD8     | snp | 10 | 35930289  | 35930289  | G | C |
| MEN0048-PO | AGL      | snp | 1  | 100356880 | 100356880 | C | T |
| MEN0048-PO | MMADHC   | snp | 2  | 150438740 | 150438740 | A | C |
| MEN0048-PO | NLRP3    | snp | 1  | 247597517 | 247597517 | G | A |
| MEN0048-PO | ZNF91    | snp | 19 | 23544783  | 23544783  | C | T |
| MEN0048-PO | F5       | snp | 1  | 169510354 | 169510354 | A | G |
| MEN0048-PO | KCNQ3    | snp | 8  | 133196524 | 133196524 | G | C |
| MEN0048-PO | CD93     | snp | 20 | 23065005  | 23065005  | G | A |
| MEN0048-PO | PHYKPL   | snp | 5  | 177651695 | 177651695 | A | C |
| MEN0048-PO | NCR3     | snp | 6  | 31557386  | 31557386  | G | A |
| MEN0048-PO | PRDM15   | snp | 21 | 43222949  | 43222949  | C | T |
| MEN0048-PO | TNNI3K   | snp | 1  | 75009602  | 75009602  | A | T |
| MEN0048-PO | MUC17    | snp | 7  | 100682505 | 100682505 | T | C |
| MEN0048-PO | PPP1R32  | snp | 11 | 61254481  | 61254481  | G | A |
| MEN0048-PO | LRRTM3   | snp | 10 | 68687485  | 68687485  | C | T |
| MEN0048-PO | PAPPA2   | snp | 1  | 176681002 | 176681002 | A | C |
| MEN0048-PO | TP53     | snp | 17 | 7578371   | 7578371   | C | T |
| MEN0048-PO | NBPF9    | snp | 1  | 144828683 | 144828683 | C | G |
| MEN0048-PO | MUC17    | snp | 7  | 100682244 | 100682244 | T | C |
| MEN0048-PO | ZNF347   | snp | 19 | 53643812  | 53643812  | C | T |
| MEN0048-PO | DHX9     | snp | 1  | 182845645 | 182845645 | T | A |
| MEN0048-PO | MUC17    | snp | 7  | 100682680 | 100682680 | G | C |
| MEN0048-PO | KRT37    | snp | 17 | 39580519  | 39580519  | G | A |
| MEN0048-PO | KLC2     | snp | 11 | 66034372  | 66034372  | G | A |
| MEN0048-PO | UNC79    | snp | 14 | 94110009  | 94110009  | C | A |
| MEN0048-PO | KMT2C    | snp | 7  | 151874763 | 151874763 | T | C |
| MEN0048-PO | SHROOM4  | snp | X  | 50377185  | 50377185  | G | A |
| MEN0048-PO | HAO2     | snp | 1  | 119936413 | 119936413 | C | T |
| MEN0048-PO | BRWD1    | snp | 21 | 40559073  | 40559073  | A | C |
| MEN0048-PO | LTBP1    | snp | 2  | 33500964  | 33500964  | G | A |
| MEN0048-PO | ZNF708   | snp | 19 | 21477046  | 21477046  | C | T |
| MEN0048-PO | ZNF117   | snp | 7  | 64439383  | 64439383  | T | C |
| MEN0048-PO | ZBTB20   | snp | 3  | 114069919 | 114069919 | C | T |
| MEN0048-PO | ZNF808   | snp | 19 | 53058687  | 53058687  | A | C |
| MEN0048-PO | NBPF10   | snp | 1  | 145299906 | 145299906 | T | G |
| MEN0048-PO | FAM50A   | snp | X  | 153678412 | 153678412 | C | T |
| MEN0048-PO | SKIV2L   | snp | 6  | 31937383  | 31937383  | G | A |
| MEN0048-PO | NOS2     | snp | 17 | 26109120  | 26109120  | G | C |
| MEN0048-PO | STAB1    | snp | 3  | 52556589  | 52556589  | T | C |
| MEN0048-PO | WDR33    | snp | 2  | 128525825 | 128525825 | C | G |
| MEN0048-PO | MDGA2    | snp | 14 | 47342740  | 47342740  | C | T |
| MEN0048-PO | STARD10  | snp | 11 | 72466113  | 72466113  | C | T |
| MEN0048-PO | ANKRD36C | snp | 2  | 96593016  | 96593016  | C | A |
| MEN0048-PO | ZNF548   | snp | 19 | 57911082  | 57911082  | C | T |
| MEN0048-PO | FKBP4    | snp | 12 | 2910467   | 2910467   | G | A |
| MEN0048-PO | KIAA1009 | snp | 6  | 84896154  | 84896154  | C | T |

|            |           |     |    |           |           |   |   |
|------------|-----------|-----|----|-----------|-----------|---|---|
| MEN0048-PO | ZNF721    | snp | 4  | 437235    | 437235    | T | C |
| MEN0048-PO | ATP9A     | snp | 20 | 50286571  | 50286571  | C | T |
| MEN0048-PO | AGBL5     | snp | 2  | 27292478  | 27292478  | G | A |
| MEN0048-PO | RPTN      | snp | 1  | 152127897 | 152127897 | C | T |
| MEN0048-PO | TAP1      | snp | 6  | 32816469  | 32816469  | G | A |
| MEN0048-PO | DNAJC13   | snp | 3  | 132244556 | 132244556 | A | G |
| MEN0048-PO | TUBB6     | snp | 18 | 12325395  | 12325395  | G | A |
| MEN0048-PO | CNTNAP3B  | snp | 9  | 43915893  | 43915893  | G | C |
| MEN0048-PO | IL3       | snp | 5  | 131398080 | 131398080 | G | C |
| MEN0048-PO | ZNF267    | snp | 16 | 31927702  | 31927702  | G | C |
| MEN0048-PO | UNC79     | snp | 14 | 94109916  | 94109916  | G | T |
| MEN0048-PO | GLP2R     | snp | 17 | 9764491   | 9764491   | G | A |
| MEN0048-PO | ZNF43     | snp | 19 | 21990830  | 21990830  | A | C |
| MEN0048-PO | IL3RA     | snp | X  | 1471267   | 1471267   | C | T |
| MEN0048-PO | CACNA1B   | snp | 9  | 140991050 | 140991050 | G | A |
| MEN0048-PO | ZNF799    | snp | 19 | 12501446  | 12501446  | T | C |
| MEN0048-PO | ZNF658    | snp | 9  | 40773116  | 40773116  | T | C |
| MEN0048-PO | CPNE4     | snp | 3  | 131261507 | 131261507 | C | T |
| MEN0048-PO | C11orf49  | snp | 11 | 47176747  | 47176747  | C | T |
| MEN0048-PO | BRINP3    | snp | 1  | 190067216 | 190067216 | C | A |
| MEN0048-PO | C3        | snp | 19 | 6713269   | 6713269   | G | T |
| MEN0048-PO | ACSL6     | snp | 5  | 131308476 | 131308476 | G | A |
| MEN0048-PO | AGRN      | snp | 1  | 981113    | 981113    | C | A |
| MEN0048-PO | ZNF267    | snp | 16 | 31927690  | 31927690  | G | A |
| MEN0048-PO | MAGEA4    | snp | X  | 151092594 | 151092594 | G | A |
| MEN0048-PO | DSP       | snp | 6  | 7585620   | 7585620   | G | A |
| MEN0048-PO | ZNF776    | snp | 19 | 58265928  | 58265928  | G | A |
| MEN0048-PO | ZFHX3     | snp | 16 | 72845884  | 72845884  | G | A |
| MEN0048-PO | KRTAP4-11 | snp | 17 | 39274206  | 39274206  | C | T |
| MEN0048-PO | ZNF431    | snp | 19 | 21366698  | 21366698  | G | A |
| MEN0048-PO | ZNF85     | snp | 19 | 21132292  | 21132292  | G | C |
| MEN0048-PO | CREBZF    | snp | 11 | 85375769  | 85375769  | G | A |
| MEN0048-PO | ZNF616    | snp | 19 | 52618845  | 52618845  | T | A |
| MEN0048-PO | INO80     | snp | 15 | 41348900  | 41348900  | G | A |
| MEN0048-PO | KCNJ4     | snp | 22 | 38824062  | 38824062  | C | T |
| MEN0048-PO | WDR90     | snp | 16 | 708627    | 708627    | G | A |
| MEN0048-PO | RHOU      | snp | 1  | 228871647 | 228871647 | T | C |
| MEN0048-PO | ZNF85     | snp | 19 | 21132615  | 21132615  | A | G |
| MEN0048-PO | ZNF585B   | snp | 19 | 37676173  | 37676173  | C | T |
| MEN0048-PO | REL       | snp | 2  | 61149606  | 61149606  | G | A |
| MEN0048-PO | PCLO      | snp | 7  | 82784366  | 82784366  | A | G |
| MEN0048-PO | LOXL2     | snp | 8  | 23225710  | 23225710  | T | C |
| MEN0048-PO | ESX1      | snp | X  | 103499160 | 103499160 | C | T |
| MEN0048-PO | CAPN7     | snp | 3  | 15282019  | 15282019  | T | G |
| MEN0048-PO | MRPL45    | snp | 17 | 36453192  | 36453192  | T | G |
| MEN0048-PO | POLR2A    | snp | 17 | 7404938   | 7404938   | G | A |
| MEN0048-PO | TUBGCP5   | snp | 15 | 22846940  | 22846940  | G | A |

|            |           |       |     |           |           |           |   |   |
|------------|-----------|-------|-----|-----------|-----------|-----------|---|---|
| MEN0048-PO | KIAA0556  | snp   | 16  | 27761387  | 27761387  | G         | A |   |
| MEN0048-PO | ZNF780B   | snp   | 19  | 40541934  | 40541934  | G         | C |   |
| MEN0048-PO | ACTG1     | snp   | 17  | 79477737  | 79477737  | G         | C |   |
| MEN0048-PO | AHNAK     | snp   | 11  | 62295870  | 62295870  | T         | C |   |
| MEN0048-PO | ZNF724P   | snp   | 19  | 23405462  | 23405462  | C         | T |   |
| MEN0048-PO | THOC2     | snp   | X   | 122774430 | 122774430 | C         | A |   |
| MEN0048-PO | ZNF431    | snp   | 19  | 21366366  | 21366366  | G         | A |   |
| MEN0048-PO | ZNF138    | snp   | 7   | 64292444  | 64292444  | A         | G |   |
| MEN0048-PO | ZNF91     | snp   | 19  | 23544222  | 23544222  | A         | C |   |
| MEN0048-PO | KLHL6     | snp   | 3   | 183226244 | 183226244 | G         | T |   |
| MEN0048-PO | ALB       | snp   | 4   | 74270854  | 74270854  | G         | A |   |
| MEN0048-PO | DNAH1     | snp   | 3   | 52383403  | 52383403  | C         | G |   |
| MEN0048-PO | ZAN       | snp   | 7   | 100350052 | 100350052 | T         | C |   |
| MEN0048-PO | SIGLEC12  | snp   | 19  | 52000192  | 52000192  | A         | G |   |
| MEN0048-PO | ANKRD36C  | snp   | 2   | 96593025  | 96593025  | C         | T |   |
| MEN0048-PO | ZNF619    | snp   | 3   | 40529017  | 40529017  | A         | C |   |
| MEN0048-PO | EFHC1     | snp   | 6   | 52303267  | 52303267  | C         | T |   |
| MEN0048-PO | ZNF721    | snp   | 4   | 436421    | 436421    | A         | G |   |
| MEN0048-PO | ZNF681    | snp   | 19  | 23927195  | 23927195  | A         | C |   |
| MEN0048-PO | PCSK5     | snp   | 9   | 78790192  | 78790192  | C         | G |   |
| MEN0048-PO | ENAM      | snp   | 4   | 71509091  | 71509091  | C         | T |   |
| MEN0048-PO | LIG3      | snp   | 17  | 33310377  | 33310377  | G         | A |   |
| MEN0048-PO | ZAN       | snp   | 7   | 100350361 | 100350361 | T         | C |   |
| MEN0048-PO | SRF       | snp   | 6   | 43146157  | 43146157  | G         | A |   |
| MEN0048-PO | KRTAP4-11 | snp   | 17  | 39274150  | 39274150  | T         | A |   |
| MEN0048-PO | ANKLE1    | snp   | 19  | 17397493  | 17397493  | G         | T |   |
| MEN0048-PO | ZNF678    | snp   | 1   | 227843257 | 227843257 | A         | G |   |
| MEN0048-PO | ZNF117    | snp   | 7   | 64439050  | 64439050  | C         | G |   |
| MEN0048-PO | ZNF678    | snp   | 1   | 227842562 | 227842562 | G         | C |   |
| MEN0048-PO | SLC16A10  | snp   | 6   | 111543299 | 111543299 | C         | T |   |
| MEN0048-PO | POM121    | snp   | 7   | 72400489  | 72400489  | T         | C |   |
| MEN0048-PO | AHNAK     | snp   | 11  | 62293095  | 62293095  | C         | T |   |
| MEN0048-PO | WDR86     | snp   | 7   | 151093196 | 151093196 | C         | T |   |
| MEN0048-PO | HLA-C     | snp   | 6   | 31239513  | 31239513  | C         | T |   |
| MEN0048-PO | FAM86C1   | snp   | 11  | 71507261  | 71507261  | A         | G |   |
| MEN0048-PO |           | 6-Sep | snp | X         | 118767441 | 118767441 | T | C |
| MEN0048-PO | PLD5      | snp   | 1   | 242253187 | 242253187 | T         | A |   |
| MEN0048-PO | ZNF708    | snp   | 19  | 21476519  | 21476519  | T         | C |   |
| MEN0048-PO | ZNF107    | snp   | 7   | 64168392  | 64168392  | A         | T |   |
| MEN0048-PO | ZNF592    | snp   | 15  | 85326684  | 85326684  | C         | G |   |
| MEN0048-PO | ZNF107    | snp   | 7   | 64168681  | 64168681  | A         | G |   |
| MEN0048-PO | ZNF708    | snp   | 19  | 21476689  | 21476689  | T         | C |   |
| MEN0048-PO | ZNF91     | snp   | 19  | 23543296  | 23543296  | T         | C |   |
| MEN0048-PO | ZNF85     | snp   | 19  | 21132356  | 21132356  | A         | G |   |
| MEN0048-PO | ZNF100    | snp   | 19  | 21909734  | 21909734  | G         | C |   |
| MEN0048-PO | ZNF91     | snp   | 19  | 23543800  | 23543800  | T         | C |   |
| MEN0048-PO | ZNF208    | snp   | 19  | 22154249  | 22154249  | A         | G |   |

|            |          |     |    |           |           |   |   |
|------------|----------|-----|----|-----------|-----------|---|---|
| MEN0048-PO | FZD8     | snp | 10 | 35930289  | 35930289  | G | C |
| MEN0048-PO | MMADHC   | snp | 2  | 150438740 | 150438740 | A | C |
| MEN0048-PO | MMADHC   | snp | 2  | 150438740 | 150438740 | A | C |
| MEN0048-PO | MMADHC   | snp | 2  | 150438740 | 150438740 | A | C |
| MEN0048-PO | ZNF208   | snp | 19 | 22155114  | 22155114  | C | T |
| MEN0048-PO | MAL      | snp | 2  | 95719159  | 95719159  | G | T |
| MEN0048-PO | GPR113   | snp | 2  | 26536256  | 26536256  | T | A |
| MEN0048-PO | ZNF267   | snp | 16 | 31927690  | 31927690  | G | A |
| MEN0048-PO | CNTNAP3B | snp | 9  | 43915893  | 43915893  | G | C |
| MEN0048-PO | CD93     | snp | 20 | 23065005  | 23065005  | G | A |
| MEN0048-PO | SLC16A10 | snp | 6  | 111543299 | 111543299 | C | T |
| MEN0048-PO | CRAMP1L  | snp | 16 | 1705221   | 1705221   | A | G |
| MEN0048-PO | ZNF708   | snp | 19 | 21476689  | 21476689  | T | C |
| MEN0048-PO | BTK      | snp | X  | 100609669 | 100609669 | C | G |
| MEN0048-PO | CAPN7    | snp | 3  | 15282019  | 15282019  | T | G |
| MEN0048-PO | RHO      | snp | 1  | 228871647 | 228871647 | T | C |
| MEN0048-PO | UNC79    | snp | 14 | 94110009  | 94110009  | C | A |
| MEN0048-PO | WDR33    | snp | 2  | 128525825 | 128525825 | C | G |
| MEN0048-PO | BMS1     | snp | 10 | 43318566  | 43318566  | G | A |
| MEN0048-PO | MRPL45   | snp | 17 | 36453192  | 36453192  | T | G |
| MEN0048-PO | MRPL45   | snp | 17 | 36453192  | 36453192  | T | G |
| MEN0048-PO | MRPL45   | snp | 17 | 36453192  | 36453192  | T | G |
| MEN0048-PO | KCNQ3    | snp | 8  | 133196524 | 133196524 | G | C |
| MEN0048-PO | ZNF117   | snp | 7  | 64439383  | 64439383  | T | C |
| MEN0048-PO | CREBZF   | snp | 11 | 85375769  | 85375769  | G | A |
| MEN0048-PO | LOXL2    | snp | 8  | 23225710  | 23225710  | T | C |
| MEN0048-PO | FAM86C1  | snp | 11 | 71507261  | 71507261  | A | G |
| MEN0048-PO | NCR3     | snp | 6  | 31557386  | 31557386  | G | A |
| MEN0048-PO | BRWD1    | snp | 21 | 40559073  | 40559073  | A | C |
| MEN0048-PO | AGL      | snp | 1  | 100356880 | 100356880 | C | T |
| MEN0048-PO | IL3      | snp | 5  | 131398080 | 131398080 | G | C |
| MEN0048-PO | ZNF721   | snp | 4  | 437235    | 437235    | T | C |
| MEN0048-PO | EFHC1    | snp | 6  | 52303267  | 52303267  | C | T |
| MEN0048-PO | SRF      | snp | 6  | 43146157  | 43146157  | G | A |
| MEN0048-PO | NBPF9    | snp | 1  | 144828707 | 144828707 | G | T |
| MEN0048-PO | ZNF347   | snp | 19 | 53643812  | 53643812  | C | T |
| MEN0048-PO | CHP2     | snp | 16 | 23767187  | 23767187  | A | T |
| MEN0048-PO | SOWAHD   | snp | X  | 118893556 | 118893556 | T | G |
| MEN0048-PO | SIGLEC12 | snp | 19 | 52000192  | 52000192  | A | G |
| MEN0048-PO | ZNF658   | snp | 9  | 40773116  | 40773116  | T | C |
| MEN0048-PO | ZNF43    | snp | 19 | 21990830  | 21990830  | A | C |
| MEN0048-PO | SLC26A11 | snp | 17 | 78210753  | 78210753  | G | A |
| MEN0048-PO | TUBGCP5  | snp | 15 | 22846940  | 22846940  | G | A |
| MEN0048-PO | AGBL5    | snp | 2  | 27292478  | 27292478  | G | A |
| MEN0048-PO | ZNF85    | snp | 19 | 21132292  | 21132292  | G | C |
| MEN0048-PO | ZNF681   | snp | 19 | 23927195  | 23927195  | A | C |
| MEN0048-PO | ZNF107   | snp | 7  | 64168392  | 64168392  | A | T |

|            |         |     |    |           |           |   |   |
|------------|---------|-----|----|-----------|-----------|---|---|
| MEN0048-P0 | PRPF6   | snp | 20 | 62630479  | 62630479  | G | A |
| MEN0048-P0 | ACSL6   | snp | 5  | 131308476 | 131308476 | G | A |
| MEN0048-P0 | KCNJ4   | snp | 22 | 38824062  | 38824062  | C | T |
| MEN0048-P0 | ZNF91   | snp | 19 | 23544783  | 23544783  | C | T |
| MEN0048-P0 | SKIV2L  | snp | 6  | 31937383  | 31937383  | G | A |
| MEN0048-P0 | EGR1    | snp | 5  | 137803490 | 137803490 | C | T |
| MEN0048-P0 | MUC16   | snp | 19 | 9056757   | 9056757   | G | T |
| MEN0048-P0 | NOS2    | snp | 17 | 26109120  | 26109120  | G | C |
| MEN0048-P0 | TNNI3K  | snp | 1  | 75009602  | 75009602  | A | T |
| MEN0048-P0 | FKBP4   | snp | 12 | 2910467   | 2910467   | G | A |
| MEN0048-P0 | RHPN2   | snp | 19 | 33493201  | 33493201  | C | T |
| MEN0048-P0 | ZNF107  | snp | 7  | 64168681  | 64168681  | A | G |
| MEN0048-P0 | TEX101  | snp | 19 | 43922422  | 43922422  | C | T |
| MEN0048-P0 | BRINP3  | snp | 1  | 190067216 | 190067216 | C | A |
| MEN0048-P0 | INO80   | snp | 15 | 41348900  | 41348900  | G | A |
| MEN0048-P0 | RAB33A  | snp | X  | 129318346 | 129318346 | G | A |
| MEN0048-P0 | MUC17   | snp | 7  | 100682244 | 100682244 | T | C |
| MEN0048-P0 | ZNF708  | snp | 19 | 21477046  | 21477046  | C | T |
| MEN0048-P0 | ELTD1   | snp | 1  | 79357261  | 79357261  | T | C |
| MEN0048-P0 | CACNA1B | snp | 9  | 140991050 | 140991050 | G | A |
| MEN0048-P0 | PHYKPL  | snp | 5  | 177651695 | 177651695 | A | C |
| MEN0048-P0 | ZNF678  | snp | 1  | 227842562 | 227842562 | G | C |
| MEN0048-P0 | ZNF431  | snp | 19 | 21366698  | 21366698  | G | A |
| MEN0048-P0 | C3      | snp | 19 | 6713269   | 6713269   | G | T |
| MEN0048-P0 | ZNF799  | snp | 19 | 12501446  | 12501446  | T | C |
| MEN0048-P0 | STARD10 | snp | 11 | 72466113  | 72466113  | C | T |
| MEN0048-P0 | PLD5    | snp | 1  | 242253187 | 242253187 | T | A |
| MEN0048-P0 | LRRTM3  | snp | 10 | 68687485  | 68687485  | C | T |
| MEN0048-P0 | PCLO    | snp | 7  | 82784366  | 82784366  | A | G |
| MEN0048-P0 | WDR90   | snp | 16 | 708627    | 708627    | G | A |
| MEN0048-P0 | EVPL    | snp | 17 | 74003956  | 74003956  | G | A |
| MEN0048-P0 | NBPF10  | snp | 1  | 145302745 | 145302745 | A | T |
| MEN0048-P0 | IL3RA   | snp | X  | 1471267   | 1471267   | C | T |
| MEN0048-P0 | STAB1   | snp | 3  | 52556589  | 52556589  | T | C |
| MEN0048-P0 | ZNF91   | snp | 19 | 23544222  | 23544222  | A | C |
| MEN0048-P0 | ZNF592  | snp | 15 | 85326684  | 85326684  | C | G |
| MEN0048-P0 | POM121  | snp | 7  | 72400489  | 72400489  | T | C |
| MEN0048-P0 | HLA-C   | snp | 6  | 31239513  | 31239513  | C | T |
| MEN0048-P0 | CPNE4   | snp | 3  | 131261507 | 131261507 | C | T |
| MEN0048-P0 | ZNF708  | snp | 19 | 21476249  | 21476249  | T | C |
| MEN0048-P0 | ATP9A   | snp | 20 | 50286571  | 50286571  | C | T |
| MEN0048-P0 | HAO2    | snp | 1  | 119936413 | 119936413 | C | T |
| MEN0048-P0 | DNAJC13 | snp | 3  | 132244556 | 132244556 | A | G |
| MEN0048-P0 | ZNF431  | snp | 19 | 21366366  | 21366366  | G | A |
| MEN0048-P0 | DSP     | snp | 6  | 7585620   | 7585620   | G | A |
| MEN0048-P0 | THOC2   | snp | X  | 122774430 | 122774430 | C | A |
| MEN0048-P0 | ZNF681  | snp | 19 | 23926839  | 23926839  | A | G |

|            |          |     |    |           |           |   |   |
|------------|----------|-----|----|-----------|-----------|---|---|
| MEN0048-P0 | ZNF91    | snp | 19 | 23543800  | 23543800  | T | C |
| MEN0048-P0 | POLR2A   | snp | 17 | 7404938   | 7404938   | G | A |
| MEN0048-P0 | ZNF138   | snp | 7  | 64292444  | 64292444  | A | G |
| MEN0048-P0 | ZNF808   | snp | 19 | 53058687  | 53058687  | A | C |
| MEN0048-P0 | ZNF91    | snp | 19 | 23543296  | 23543296  | T | C |
| MEN0048-P0 | ACTG1    | snp | 17 | 79477737  | 79477737  | G | C |
| MEN0048-P0 | ZNF616   | snp | 19 | 52618845  | 52618845  | T | A |
| MEN0048-P0 | TUBB6    | snp | 18 | 12325395  | 12325395  | G | A |
| MEN0048-P0 | KRT37    | snp | 17 | 39580519  | 39580519  | G | A |
| MEN0048-P0 | NLRP3    | snp | 1  | 247597517 | 247597517 | G | A |
| MEN0048-P0 | NBPF10   | snp | 1  | 145299906 | 145299906 | T | G |
| MEN0048-P0 | MUC17    | snp | 7  | 100682680 | 100682680 | G | C |
| MEN0048-P0 | F5       | snp | 1  | 169510354 | 169510354 | A | G |
| MEN0048-P0 | KMT2C    | snp | 7  | 151874763 | 151874763 | T | C |
| MEN0048-P0 | ZNF117   | snp | 7  | 64439050  | 64439050  | C | G |
| MEN0048-P0 | KLC2     | snp | 11 | 66034372  | 66034372  | G | A |
| MEN0048-P0 | DAXX     | snp | 6  | 33289272  | 33289272  | G | A |
| MEN0048-P0 | ZFHX3    | snp | 16 | 72845884  | 72845884  | G | A |
| MEN0048-P0 | NRSN1    | snp | 6  | 24146146  | 24146146  | A | G |
| MEN0048-P0 | DNAH1    | snp | 3  | 52383403  | 52383403  | C | G |
| MEN0048-P0 | FAM47A   | snp | X  | 34149266  | 34149266  | G | A |
| MEN0048-P0 | DHX9     | snp | 1  | 182845645 | 182845645 | T | A |
| MEN0048-P0 | ZNF585B  | snp | 19 | 37676173  | 37676173  | C | T |
| MEN0048-P0 | ZNF85    | snp | 19 | 21132615  | 21132615  | A | G |
| MEN0048-P0 | MDGA2    | snp | 14 | 47342740  | 47342740  | C | T |
| MEN0048-P0 | ESX1     | snp | X  | 103499160 | 103499160 | C | T |
| MEN0048-P0 | ZNF678   | snp | 1  | 227843257 | 227843257 | A | G |
| MEN0048-P0 | NBPF9    | snp | 1  | 144828683 | 144828683 | C | G |
| MEN0048-P0 | SHROOM4  | snp | X  | 50377185  | 50377185  | G | A |
| MEN0048-P0 | ZNF724P  | snp | 19 | 23405462  | 23405462  | C | T |
| MEN0048-P0 | ATP6V1H  | snp | 8  | 54708292  | 54708292  | C | T |
| MEN0048-P0 | PPP1R32  | snp | 11 | 61254481  | 61254481  | G | A |
| MEN0048-P0 | ZBTB20   | snp | 3  | 114069919 | 114069919 | C | T |
| MEN0048-P0 | ANKRD36C | snp | 2  | 96593025  | 96593025  | C | T |
| MEN0048-P0 | TAP1     | snp | 6  | 32816469  | 32816469  | G | A |
| MEN0048-P0 | MAGEA4   | snp | X  | 151092594 | 151092594 | G | A |
| MEN0048-P0 | PRDM15   | snp | 21 | 43222949  | 43222949  | C | T |
| MEN0048-P0 | KLHL6    | snp | 3  | 183226244 | 183226244 | G | T |
| MEN0048-P0 | ZNF708   | snp | 19 | 21476519  | 21476519  | T | C |
| MEN0048-P0 | C11orf49 | snp | 11 | 47176747  | 47176747  | C | T |
| MEN0048-P0 | ZNF776   | snp | 19 | 58265928  | 58265928  | G | A |
| MEN0048-P0 | LTBP1    | snp | 2  | 33500964  | 33500964  | G | A |
| MEN0048-P0 | GLP2R    | snp | 17 | 9764491   | 9764491   | G | A |
| MEN0048-P0 | ZNF85    | snp | 19 | 21132356  | 21132356  | A | G |
| MEN0048-P0 | ZNF780B  | snp | 19 | 40541934  | 40541934  | G | C |
| MEN0048-P0 | ZNF100   | snp | 19 | 21909734  | 21909734  | G | C |
| MEN0048-P0 | ZNF721   | snp | 4  | 436421    | 436421    | A | G |



|            |           |           |    |           |           |   |   |
|------------|-----------|-----------|----|-----------|-----------|---|---|
| MEN0048-P0 | ZNF208    | snp       | 19 | 22154249  | 22154249  | A | G |
| MEN0048-P0 | ZNF676    | snp       | 19 | 22363008  | 22363008  | C | G |
| MEN0048-P0 | ZNF619    | snp       | 3  | 40529017  | 40529017  | A | C |
| MEN0048-P0 | ALB       | snp       | 4  | 74270854  | 74270854  | G | A |
| MEN0048-P0 | FAM50A    | snp       | X  | 153678412 | 153678412 | C | T |
| MEN0048-P0 | LIG3      | snp       | 17 | 33310377  | 33310377  | G | A |
| MEN0048-P0 | PAPPA2    | snp       | 1  | 176681002 | 176681002 | A | C |
| MEN0048-P0 | AGRN      | snp       | 1  | 981113    | 981113    | C | A |
| MEN0048-P0 | MUC17     | snp       | 7  | 100682505 | 100682505 | T | C |
| MEN0048-P0 | ZNF548    | snp       | 19 | 57911082  | 57911082  | C | T |
| MEN0048-P0 | KIAA0556  | snp       | 16 | 27761387  | 27761387  | G | A |
| MEN0048-P0 | AHNAK     | snp       | 11 | 62293095  | 62293095  | C | T |
| MEN0048-P0 | REL       | snp       | 2  | 61149606  | 61149606  | G | A |
| MEN0048-P0 | PCSK5     | snp       | 9  | 78790192  | 78790192  | C | G |
| MEN0048-P0 | TBC1D14   | snp       | 4  | 6925486   | 6925486   | G | A |
| MEN0048-P0 | AHNAK     | snp       | 11 | 62295870  | 62295870  | T | C |
| MEN0048-P0 | WDR86     | snp       | 7  | 151093196 | 151093196 | C | T |
| MEN0048-P0 | TP53      | snp       | 17 | 7578371   | 7578371   | C | T |
| MEN0048-P0 | STON2     | snp       | 14 | 81744954  | 81744954  | G | T |
| MEN0048-P0 | NBPF10    | snp       | 1  | 145296448 | 145296448 | T | A |
| MEN0048-P0 | MPP1      | snp       | X  | 154020552 | 154020552 | C | A |
| MEN0048-P0 | RPTN      | snp       | 1  | 152127897 | 152127897 | C | T |
| MEN0048-P0 | KIAA1009  | snp       | 6  | 84896154  | 84896154  | C | T |
| MEN0048-P0 | ZNF714    | snp       | 19 | 21300738  | 21300738  | T | C |
| MEN0048-P0 |           | 6-Sep snp | X  | 118767441 | 118767441 | T | C |
| MEN0048-P0 | KRTAP4-11 | snp       | 17 | 39274150  | 39274150  | T | A |
| MEN0048-P0 | UNC79     | snp       | 14 | 94109916  | 94109916  | G | T |
| MEN0048-P0 | ENAM      | snp       | 4  | 71509091  | 71509091  | C | T |
| MEN0048-P0 | ZAN       | snp       | 7  | 100350052 | 100350052 | T | C |
| MEN0048-P0 | KRTAP4-11 | snp       | 17 | 39274206  | 39274206  | C | T |
| MEN0048-P0 | ZAN       | snp       | 7  | 100350361 | 100350361 | T | C |
| MEN0048-P0 | ANKLE1    | snp       | 19 | 17397493  | 17397493  | G | T |
| MEN0048-P2 | MAL       | snp       | 2  | 95719159  | 95719159  | G | T |
| MEN0048-P2 | NBPF9     | snp       | 1  | 144828624 | 144828624 | A | T |
| MEN0048-P2 | NBPF9     | snp       | 1  | 144828707 | 144828707 | G | T |
| MEN0048-P2 | NBPF10    | snp       | 1  | 145296448 | 145296448 | T | A |
| MEN0048-P2 | RUNX2     | snp       | 6  | 45514792  | 45514792  | C | G |
| MEN0048-P2 | WNK2      | snp       | 9  | 96062396  | 96062396  | C | G |
| MEN0048-P2 | CENPE     | snp       | 4  | 104029980 | 104029980 | G | A |
| MEN0048-P2 | BTK       | snp       | X  | 100609669 | 100609669 | C | G |
| MEN0048-P2 | YIPF7     | snp       | 4  | 44631547  | 44631547  | T | C |
| MEN0048-P2 | STON2     | snp       | 14 | 81744954  | 81744954  | G | T |
| MEN0048-P2 | MPP1      | snp       | X  | 154020552 | 154020552 | C | A |
| MEN0048-P2 | OR8I2     | snp       | 11 | 55861616  | 55861616  | C | T |
| MEN0048-P2 | ELOVL5    | snp       | 6  | 53156637  | 53156637  | G | C |
| MEN0048-P2 | CRAMP1L   | snp       | 16 | 1705221   | 1705221   | A | G |
| MEN0048-P2 | FZD8      | snp       | 10 | 35930289  | 35930289  | G | C |

|            |           |     |    |           |           |   |   |
|------------|-----------|-----|----|-----------|-----------|---|---|
| MEN0048-P2 | AGL       | snp | 1  | 100356880 | 100356880 | C | T |
| MEN0048-P2 | IRS4      | snp | X  | 107976735 | 107976735 | A | C |
| MEN0048-P2 | ZNF7      | snp | 8  | 146067855 | 146067855 | C | T |
| MEN0048-P2 | PHYKPL    | snp | 5  | 177651695 | 177651695 | A | C |
| MEN0048-P2 | COL6A6    | snp | 3  | 130285695 | 130285695 | G | A |
| MEN0048-P2 | PAPPA2    | snp | 1  | 176681002 | 176681002 | A | C |
| MEN0048-P2 | TP53      | snp | 17 | 7578371   | 7578371   | C | T |
| MEN0048-P2 | NBPF9     | snp | 1  | 144828683 | 144828683 | C | G |
| MEN0048-P2 | SLC2A9    | snp | 4  | 9998448   | 9998448   | C | T |
| MEN0048-P2 | SLC17A2   | snp | 6  | 25924070  | 25924070  | C | T |
| MEN0048-P2 | ZNF254    | snp | 19 | 24310294  | 24310294  | T | G |
| MEN0048-P2 | KMT2C     | snp | 7  | 151874763 | 151874763 | T | C |
| MEN0048-P2 | SHROOM4   | snp | X  | 50377185  | 50377185  | G | A |
| MEN0048-P2 | HAO2      | snp | 1  | 119936413 | 119936413 | C | T |
| MEN0048-P2 | BRWD1     | snp | 21 | 40559073  | 40559073  | A | C |
| MEN0048-P2 | TACR3     | snp | 4  | 104579451 | 104579451 | G | A |
| MEN0048-P2 | BCAS3     | snp | 17 | 59093261  | 59093261  | G | A |
| MEN0048-P2 | SETD2     | snp | 3  | 47088054  | 47088054  | G | T |
| MEN0048-P2 | STAB1     | snp | 3  | 52556589  | 52556589  | T | C |
| MEN0048-P2 | PXDNL     | snp | 8  | 52321350  | 52321350  | G | A |
| MEN0048-P2 | CHRNA3    | snp | 15 | 78894452  | 78894452  | C | T |
| MEN0048-P2 | UBR5      | snp | 8  | 103372850 | 103372850 | C | A |
| MEN0048-P2 | DLG1      | snp | 3  | 196803489 | 196803489 | T | G |
| MEN0048-P2 | ZNF548    | snp | 19 | 57911082  | 57911082  | C | T |
| MEN0048-P2 | CMTM1     | snp | 16 | 66600543  | 66600543  | A | C |
| MEN0048-P2 | GLP2R     | snp | 17 | 9764491   | 9764491   | G | A |
| MEN0048-P2 | BRINP3    | snp | 1  | 190067216 | 190067216 | C | A |
| MEN0048-P2 | ZNF808    | snp | 19 | 53056864  | 53056864  | C | A |
| MEN0048-P2 | CCR7      | snp | 17 | 38711074  | 38711074  | G | A |
| MEN0048-P2 | ACSL6     | snp | 5  | 131308476 | 131308476 | G | A |
| MEN0048-P2 | CREBZF    | snp | 11 | 85375769  | 85375769  | G | A |
| MEN0048-P2 | THSD4     | snp | 15 | 72037537  | 72037537  | G | A |
| MEN0048-P2 | ABCA10    | snp | 17 | 67149465  | 67149465  | C | T |
| MEN0048-P2 | WDR90     | snp | 16 | 708627    | 708627    | G | A |
| MEN0048-P2 | LOXL2     | snp | 8  | 23225710  | 23225710  | T | C |
| MEN0048-P2 | THOC2     | snp | X  | 122774430 | 122774430 | C | A |
| MEN0048-P2 | RGPD3     | snp | 2  | 107049681 | 107049681 | T | C |
| MEN0048-P2 | ZNF431    | snp | 19 | 21366366  | 21366366  | G | A |
| MEN0048-P2 | ZNF91     | snp | 19 | 23544724  | 23544724  | T | C |
| MEN0048-P2 | UTP15     | snp | 5  | 72875765  | 72875765  | G | A |
| MEN0048-P2 | SIGLEC12  | snp | 19 | 52000192  | 52000192  | A | G |
| MEN0048-P2 | KRTAP4-11 | snp | 17 | 39274161  | 39274161  | T | C |
| MEN0048-P2 | NBPF20    | snp | 1  | 148252752 | 148252752 | C | T |
| MEN0048-P2 | MBD3      | snp | 19 | 1584563   | 1584563   | C | A |
| MEN0048-P2 | FAM86C1   | snp | 11 | 71507261  | 71507261  | A | G |
| MEN0048-P2 | TBK1      | snp | 12 | 64889350  | 64889350  | G | A |
| MEN0048-P2 | ANKRD36C  | snp | 2  | 96521815  | 96521815  | C | A |

|            |          |     |    |           |           |   |   |
|------------|----------|-----|----|-----------|-----------|---|---|
| MEN0048-P2 | PLD5     | snp | 1  | 242253187 | 242253187 | T | A |
| MEN0048-P2 | MYH13    | snp | 17 | 10214514  | 10214514  | G | C |
| MEN0048-P2 | KNG1     | snp | 3  | 186459531 | 186459531 | G | A |
| MEN0048-P2 | FZD8     | snp | 10 | 35930289  | 35930289  | G | C |
| MEN0048-P2 | SETD2    | snp | 3  | 47088054  | 47088054  | G | T |
| MEN0048-P2 | MAL      | snp | 2  | 95719159  | 95719159  | G | T |
| MEN0048-P2 | WNK2     | snp | 9  | 96062396  | 96062396  | C | G |
| MEN0048-P2 | CRAMP1L  | snp | 16 | 1705221   | 1705221   | A | G |
| MEN0048-P2 | BTK      | snp | X  | 100609669 | 100609669 | C | G |
| MEN0048-P2 | SLC2A9   | snp | 4  | 9998448   | 9998448   | C | T |
| MEN0048-P2 | SLC17A2  | snp | 6  | 25924070  | 25924070  | C | T |
| MEN0048-P2 | SLC17A2  | snp | 6  | 25924070  | 25924070  | C | T |
| MEN0048-P2 | CREBZF   | snp | 11 | 85375769  | 85375769  | G | A |
| MEN0048-P2 | LOXL2    | snp | 8  | 23225710  | 23225710  | T | C |
| MEN0048-P2 | OR812    | snp | 11 | 55861616  | 55861616  | C | T |
| MEN0048-P2 | FAM86C1  | snp | 11 | 71507261  | 71507261  | A | G |
| MEN0048-P2 | BRWD1    | snp | 21 | 40559073  | 40559073  | A | C |
| MEN0048-P2 | AGL      | snp | 1  | 100356880 | 100356880 | C | T |
| MEN0048-P2 | NBPF9    | snp | 1  | 144828707 | 144828707 | G | T |
| MEN0048-P2 | CCR7     | snp | 17 | 38711074  | 38711074  | G | A |
| MEN0048-P2 | SIGLEC12 | snp | 19 | 52000192  | 52000192  | A | G |
| MEN0048-P2 | CMTM1    | snp | 16 | 66600543  | 66600543  | A | C |
| MEN0048-P2 | COL6A6   | snp | 3  | 130285695 | 130285695 | G | A |
| MEN0048-P2 | RUNX2    | snp | 6  | 45514792  | 45514792  | C | G |
| MEN0048-P2 | TACR3    | snp | 4  | 104579451 | 104579451 | G | A |
| MEN0048-P2 | TBK1     | snp | 12 | 64889350  | 64889350  | G | A |
| MEN0048-P2 | ZNF254   | snp | 19 | 24310294  | 24310294  | T | G |
| MEN0048-P2 | ANKRD36C | snp | 2  | 96521815  | 96521815  | C | A |
| MEN0048-P2 | ACSL6    | snp | 5  | 131308476 | 131308476 | G | A |
| MEN0048-P2 | BCAS3    | snp | 17 | 59093261  | 59093261  | G | A |
| MEN0048-P2 | DLG1     | snp | 3  | 196803489 | 196803489 | T | G |
| MEN0048-P2 | BRINP3   | snp | 1  | 190067216 | 190067216 | C | A |
| MEN0048-P2 | PHYKPL   | snp | 5  | 177651695 | 177651695 | A | C |
| MEN0048-P2 | PLD5     | snp | 1  | 242253187 | 242253187 | T | A |
| MEN0048-P2 | ZNF7     | snp | 8  | 146067855 | 146067855 | C | T |
| MEN0048-P2 | WDR90    | snp | 16 | 708627    | 708627    | G | A |
| MEN0048-P2 | STAB1    | snp | 3  | 52556589  | 52556589  | T | C |
| MEN0048-P2 | YIPF7    | snp | 4  | 44631547  | 44631547  | T | C |
| MEN0048-P2 | HAO2     | snp | 1  | 119936413 | 119936413 | C | T |
| MEN0048-P2 | ZNF431   | snp | 19 | 21366366  | 21366366  | G | A |
| MEN0048-P2 | THOC2    | snp | X  | 122774430 | 122774430 | C | A |
| MEN0048-P2 | ZNF91    | snp | 19 | 23544724  | 23544724  | T | C |
| MEN0048-P2 | ELOVL5   | snp | 6  | 53156637  | 53156637  | G | C |
| MEN0048-P2 | KMT2C    | snp | 7  | 151874763 | 151874763 | T | C |
| MEN0048-P2 | NBPF9    | snp | 1  | 144828683 | 144828683 | C | G |
| MEN0048-P2 | SHROOM4  | snp | X  | 50377185  | 50377185  | G | A |
| MEN0048-P2 | IRS4     | snp | X  | 107976735 | 107976735 | A | C |

|            |           |     |    |           |           |   |   |
|------------|-----------|-----|----|-----------|-----------|---|---|
| MEN0048-P2 | PXDNL     | snp | 8  | 52321350  | 52321350  | G | A |
| MEN0048-P2 | CENPE     | snp | 4  | 104029980 | 104029980 | G | A |
| MEN0048-P2 | GLP2R     | snp | 17 | 9764491   | 9764491   | G | A |
| MEN0048-P2 | ABCA10    | snp | 17 | 67149465  | 67149465  | C | T |
| MEN0048-P2 | NBPF9     | snp | 1  | 144828624 | 144828624 | A | T |
| MEN0048-P2 | RGPD3     | snp | 2  | 107049681 | 107049681 | T | C |
| MEN0048-P2 | ZNF808    | snp | 19 | 53056864  | 53056864  | C | A |
| MEN0048-P2 | UTP15     | snp | 5  | 72875765  | 72875765  | G | A |
| MEN0048-P2 | PAPPA2    | snp | 1  | 176681002 | 176681002 | A | C |
| MEN0048-P2 | UBR5      | snp | 8  | 103372850 | 103372850 | C | A |
| MEN0048-P2 | ZNF548    | snp | 19 | 57911082  | 57911082  | C | T |
| MEN0048-P2 | CHRNA3    | snp | 15 | 78894452  | 78894452  | C | T |
| MEN0048-P2 | TP53      | snp | 17 | 7578371   | 7578371   | C | T |
| MEN0048-P2 | STON2     | snp | 14 | 81744954  | 81744954  | G | T |
| MEN0048-P2 | NBPF10    | snp | 1  | 145296448 | 145296448 | T | A |
| MEN0048-P2 | MPP1      | snp | X  | 154020552 | 154020552 | C | A |
| MEN0048-P2 | KRTAP4-11 | snp | 17 | 39274161  | 39274161  | T | C |
| MEN0048-P2 | MBD3      | snp | 19 | 1584563   | 1584563   | C | A |
| MEN0048-P2 | MYH13     | snp | 17 | 10214514  | 10214514  | G | C |
| MEN0048-P2 | THSD4     | snp | 15 | 72037537  | 72037537  | G | A |
| MEN0048-P2 | KNG1      | snp | 3  | 186459531 | 186459531 | G | A |
| MEN0048-P2 | NBPF20    | snp | 1  | 148252752 | 148252752 | C | T |
| MEN0048-P3 | MAL       | snp | 2  | 95719159  | 95719159  | G | T |
| MEN0048-P3 | NBPF9     | snp | 1  | 144828624 | 144828624 | A | T |
| MEN0048-P3 | NBPF9     | snp | 1  | 144828707 | 144828707 | G | T |
| MEN0048-P3 | CHP2      | snp | 16 | 23767187  | 23767187  | A | T |
| MEN0048-P3 | NBPF10    | snp | 1  | 145296448 | 145296448 | T | A |
| MEN0048-P3 | RUNX2     | snp | 6  | 45514792  | 45514792  | C | G |
| MEN0048-P3 | WNK2      | snp | 9  | 96062396  | 96062396  | C | G |
| MEN0048-P3 | CENPE     | snp | 4  | 104029980 | 104029980 | G | A |
| MEN0048-P3 | BTK       | snp | X  | 100609669 | 100609669 | C | G |
| MEN0048-P3 | STON2     | snp | 14 | 81744954  | 81744954  | G | T |
| MEN0048-P3 | MPP1      | snp | X  | 154020552 | 154020552 | C | A |
| MEN0048-P3 | SOWAHD    | snp | X  | 118893556 | 118893556 | T | G |
| MEN0048-P3 | ELOVL5    | snp | 6  | 53156637  | 53156637  | G | C |
| MEN0048-P3 | CRAMP1L   | snp | 16 | 1705221   | 1705221   | A | G |
| MEN0048-P3 | FZD8      | snp | 10 | 35930289  | 35930289  | G | C |
| MEN0048-P3 | AGL       | snp | 1  | 100356880 | 100356880 | C | T |
| MEN0048-P3 | IRS4      | snp | X  | 107976735 | 107976735 | A | C |
| MEN0048-P3 | PHYKPL    | snp | 5  | 177651695 | 177651695 | A | C |
| MEN0048-P3 | PAPPA2    | snp | 1  | 176681002 | 176681002 | A | C |
| MEN0048-P3 | TP53      | snp | 17 | 7578371   | 7578371   | C | T |
| MEN0048-P3 | NBPF9     | snp | 1  | 144828683 | 144828683 | C | G |
| MEN0048-P3 | AQP7      | snp | 9  | 33385614  | 33385614  | A | T |
| MEN0048-P3 | SLC17A2   | snp | 6  | 25924070  | 25924070  | C | T |
| MEN0048-P3 | KMT2C     | snp | 7  | 151874763 | 151874763 | T | C |
| MEN0048-P3 | SHROOM4   | snp | X  | 50377185  | 50377185  | G | A |

|            |          |     |    |           |           |   |   |
|------------|----------|-----|----|-----------|-----------|---|---|
| MEN0048-P3 | HAO2     | snp | 1  | 119936413 | 119936413 | C | T |
| MEN0048-P3 | BRWD1    | snp | 21 | 40559073  | 40559073  | A | C |
| MEN0048-P3 | TACR3    | snp | 4  | 104579451 | 104579451 | G | A |
| MEN0048-P3 | FAM86C1  | snp | 11 | 71507232  | 71507232  | C | G |
| MEN0048-P3 | SETD2    | snp | 3  | 47088054  | 47088054  | G | T |
| MEN0048-P3 | NBPF9    | snp | 1  | 144828704 | 144828704 | T | G |
| MEN0048-P3 | STAB1    | snp | 3  | 52556589  | 52556589  | T | C |
| MEN0048-P3 | PXDNL    | snp | 8  | 52321350  | 52321350  | G | A |
| MEN0048-P3 | CHRNA3   | snp | 15 | 78894452  | 78894452  | C | T |
| MEN0048-P3 | DLG1     | snp | 3  | 196803489 | 196803489 | T | G |
| MEN0048-P3 | ZNF548   | snp | 19 | 57911082  | 57911082  | C | T |
| MEN0048-P3 | CMTM1    | snp | 16 | 66600543  | 66600543  | A | C |
| MEN0048-P3 | GLP2R    | snp | 17 | 9764491   | 9764491   | G | A |
| MEN0048-P3 | BRINP3   | snp | 1  | 190067216 | 190067216 | C | A |
| MEN0048-P3 | CCR7     | snp | 17 | 38711074  | 38711074  | G | A |
| MEN0048-P3 | ACSL6    | snp | 5  | 131308476 | 131308476 | G | A |
| MEN0048-P3 | FAM133A  | snp | X  | 92964673  | 92964673  | G | T |
| MEN0048-P3 | CREBZF   | snp | 11 | 85375769  | 85375769  | G | A |
| MEN0048-P3 | WDR90    | snp | 16 | 708627    | 708627    | G | A |
| MEN0048-P3 | LOXL2    | snp | 8  | 23225710  | 23225710  | T | C |
| MEN0048-P3 | THOC2    | snp | X  | 122774430 | 122774430 | C | A |
| MEN0048-P3 | RGPD3    | snp | 2  | 107049681 | 107049681 | T | C |
| MEN0048-P3 | UTP15    | snp | 5  | 72875765  | 72875765  | G | A |
| MEN0048-P3 | SIGLEC12 | snp | 19 | 52000192  | 52000192  | A | G |
| MEN0048-P3 | PCSK5    | snp | 9  | 78790192  | 78790192  | C | G |
| MEN0048-P3 | DNAAF2   | snp | 14 | 50100271  | 50100271  | T | C |
| MEN0048-P3 | MCC      | snp | 5  | 112824054 | 112824054 | C | T |
| MEN0048-P3 | PRG4     | snp | 1  | 186276794 | 186276794 | T | C |
| MEN0048-P3 | FAM86C1  | snp | 11 | 71507261  | 71507261  | A | G |
| MEN0048-P3 | PLD5     | snp | 1  | 242253187 | 242253187 | T | A |
| MEN0048-P3 | MYH13    | snp | 17 | 10214514  | 10214514  | G | C |
| MEN0048-P3 | TCEAL3   | snp | X  | 102864204 | 102864204 | G | A |
| MEN0048-P3 | MDK      | snp | 11 | 46404331  | 46404331  | C | G |
| MEN0048-P3 | FZD8     | snp | 10 | 35930289  | 35930289  | G | C |
| MEN0048-P3 | MDK      | snp | 11 | 46404331  | 46404331  | C | G |
| MEN0048-P3 | SETD2    | snp | 3  | 47088054  | 47088054  | G | T |
| MEN0048-P3 | MCC      | snp | 5  | 112824054 | 112824054 | C | T |
| MEN0048-P3 | MAL      | snp | 2  | 95719159  | 95719159  | G | T |
| MEN0048-P3 | WNK2     | snp | 9  | 96062396  | 96062396  | C | G |
| MEN0048-P3 | CRAMP1L  | snp | 16 | 1705221   | 1705221   | A | G |
| MEN0048-P3 | BTK      | snp | X  | 100609669 | 100609669 | C | G |
| MEN0048-P3 | SLC17A2  | snp | 6  | 25924070  | 25924070  | C | T |
| MEN0048-P3 | SLC17A2  | snp | 6  | 25924070  | 25924070  | C | T |
| MEN0048-P3 | CREBZF   | snp | 11 | 85375769  | 85375769  | G | A |
| MEN0048-P3 | LOXL2    | snp | 8  | 23225710  | 23225710  | T | C |
| MEN0048-P3 | FAM86C1  | snp | 11 | 71507232  | 71507232  | C | G |
| MEN0048-P3 | BRWD1    | snp | 21 | 40559073  | 40559073  | A | C |

|             |          |     |    |           |           |   |   |
|-------------|----------|-----|----|-----------|-----------|---|---|
| MEN0048-P3  | AGL      | snp | 1  | 100356880 | 100356880 | C | T |
| MEN0048-P3  | NBPF9    | snp | 1  | 144828707 | 144828707 | G | T |
| MEN0048-P3  | CCR7     | snp | 17 | 38711074  | 38711074  | G | A |
| MEN0048-P3  | CHP2     | snp | 16 | 23767187  | 23767187  | A | T |
| MEN0048-P3  | SOWAHD   | snp | X  | 118893556 | 118893556 | T | G |
| MEN0048-P3  | SIGLEC12 | snp | 19 | 52000192  | 52000192  | A | G |
| MEN0048-P3  | CMTM1    | snp | 16 | 66600543  | 66600543  | A | C |
| MEN0048-P3  | RUNX2    | snp | 6  | 45514792  | 45514792  | C | G |
| MEN0048-P3  | TACR3    | snp | 4  | 104579451 | 104579451 | G | A |
| MEN0048-P3  | ACSL6    | snp | 5  | 131308476 | 131308476 | G | A |
| MEN0048-P3  | DLG1     | snp | 3  | 196803489 | 196803489 | T | G |
| MEN0048-P3  | BRINP3   | snp | 1  | 190067216 | 190067216 | C | A |
| MEN0048-P3  | PHYKPL   | snp | 5  | 177651695 | 177651695 | A | C |
| MEN0048-P3  | PLD5     | snp | 1  | 242253187 | 242253187 | T | A |
| MEN0048-P3  | WDR90    | snp | 16 | 708627    | 708627    | G | A |
| MEN0048-P3  | STAB1    | snp | 3  | 52556589  | 52556589  | T | C |
| MEN0048-P3  | HAO2     | snp | 1  | 119936413 | 119936413 | C | T |
| MEN0048-P3  | THOC2    | snp | X  | 122774430 | 122774430 | C | A |
| MEN0048-P3  | ELOVL5   | snp | 6  | 53156637  | 53156637  | G | C |
| MEN0048-P3  | DNAAF2   | snp | 14 | 50100271  | 50100271  | T | C |
| MEN0048-P3  | KMT2C    | snp | 7  | 151874763 | 151874763 | T | C |
| MEN0048-P3  | AQP7     | snp | 9  | 33385614  | 33385614  | A | T |
| MEN0048-P3  | NBPF9    | snp | 1  | 144828683 | 144828683 | C | G |
| MEN0048-P3  | SHROOM4  | snp | X  | 50377185  | 50377185  | G | A |
| MEN0048-P3  | IRS4     | snp | X  | 107976735 | 107976735 | A | C |
| MEN0048-P3  | PXDNL    | snp | 8  | 52321350  | 52321350  | G | A |
| MEN0048-P3  | CENPE    | snp | 4  | 104029980 | 104029980 | G | A |
| MEN0048-P3  | GLP2R    | snp | 17 | 9764491   | 9764491   | G | A |
| MEN0048-P3  | NBPF9    | snp | 1  | 144828624 | 144828624 | A | T |
| MEN0048-P3  | RGPD3    | snp | 2  | 107049681 | 107049681 | T | C |
| MEN0048-P3  | FAM133A  | snp | X  | 92964673  | 92964673  | G | T |
| MEN0048-P3  | UTP15    | snp | 5  | 72875765  | 72875765  | G | A |
| MEN0048-P3  | PAPPA2   | snp | 1  | 176681002 | 176681002 | A | C |
| MEN0048-P3  | ZNF548   | snp | 19 | 57911082  | 57911082  | C | T |
| MEN0048-P3  | CHRNA3   | snp | 15 | 78894452  | 78894452  | C | T |
| MEN0048-P3  | PCSK5    | snp | 9  | 78790192  | 78790192  | C | G |
| MEN0048-P3  | TP53     | snp | 17 | 7578371   | 7578371   | C | T |
| MEN0048-P3  | STON2    | snp | 14 | 81744954  | 81744954  | G | T |
| MEN0048-P3  | NBPF10   | snp | 1  | 145296448 | 145296448 | T | A |
| MEN0048-P3  | MPP1     | snp | X  | 154020552 | 154020552 | C | A |
| MEN0048-P3  | MYH13    | snp | 17 | 10214514  | 10214514  | G | C |
| MEN0048-P3  | PRG4     | snp | 1  | 186276794 | 186276794 | T | C |
| MEN0048-P3  | TCEAL3   | snp | X  | 102864204 | 102864204 | G | A |
| MEN0048G-P1 | MAL      | snp | 2  | 95719159  | 95719159  | G | T |
| MEN0048G-P1 | UTS2R    | snp | 17 | 80332919  | 80332919  | G | A |
| MEN0048G-P1 | CHP2     | snp | 16 | 23767187  | 23767187  | A | T |
| MEN0048G-P1 | RUNX2    | snp | 6  | 45514792  | 45514792  | C | G |

|             |              |     |    |           |           |   |   |
|-------------|--------------|-----|----|-----------|-----------|---|---|
| MEN0048G-P1 | BTK          | snp | X  | 100609669 | 100609669 | C | G |
| MEN0048G-P1 | YIPF7        | snp | 4  | 44631547  | 44631547  | T | C |
| MEN0048G-P1 | BEST3        | snp | 12 | 70049318  | 70049318  | C | A |
| MEN0048G-P1 | STON2        | snp | 14 | 81744954  | 81744954  | G | T |
| MEN0048G-P1 | EYS          | snp | 6  | 66005780  | 66005780  | G | A |
| MEN0048G-P1 | MPP1         | snp | X  | 154020552 | 154020552 | C | A |
| MEN0048G-P1 | SOWAHD       | snp | X  | 118893556 | 118893556 | T | G |
| MEN0048G-P1 | ELOVL5       | snp | 6  | 53156637  | 53156637  | G | C |
| MEN0048G-P1 | CRAMP1L      | snp | 16 | 1705221   | 1705221   | A | G |
| MEN0048G-P1 | RAB6C        | snp | 2  | 130738031 | 130738031 | A | G |
| MEN0048G-P1 | KDM5C        | snp | X  | 53228235  | 53228235  | C | A |
| MEN0048G-P1 | CAMSAP3      | snp | 19 | 7671226   | 7671226   | G | A |
| MEN0048G-P1 | FZD8         | snp | 10 | 35930289  | 35930289  | G | C |
| MEN0048G-P1 | AGL          | snp | 1  | 100356880 | 100356880 | C | T |
| MEN0048G-P1 | CACNA1B      | snp | 9  | 140919411 | 140919411 | C | A |
| MEN0048G-P1 | CCDC132      | snp | 7  | 92985368  | 92985368  | G | A |
| MEN0048G-P1 | PHYKPL       | snp | 5  | 177651695 | 177651695 | A | C |
| MEN0048G-P1 | PAPPA2       | snp | 1  | 176681002 | 176681002 | A | C |
| MEN0048G-P1 | TP53         | snp | 17 | 7578371   | 7578371   | C | T |
| MEN0048G-P1 | ARHGEF5      | snp | 7  | 144061047 | 144061047 | A | G |
| MEN0048G-P1 | LRTM2        | snp | 12 | 1940319   | 1940319   | C | T |
| MEN0048G-P1 | KMT2C        | snp | 7  | 151874763 | 151874763 | T | C |
| MEN0048G-P1 | SHROOM4      | snp | X  | 50377185  | 50377185  | G | A |
| MEN0048G-P1 | HAO2         | snp | 1  | 119936413 | 119936413 | C | T |
| MEN0048G-P1 | BRWD1        | snp | 21 | 40559073  | 40559073  | A | C |
| MEN0048G-P1 | HELZ2        | snp | 20 | 62195972  | 62195972  | C | A |
| MEN0048G-P1 | FANCD2       | snp | 3  | 10114557  | 10114557  | A | G |
| MEN0048G-P1 | ELN          | snp | 7  | 73450900  | 73450900  | C | A |
| MEN0048G-P1 | NBAS         | snp | 2  | 15326889  | 15326889  | T | C |
| MEN0048G-P1 | PIIP5K1      | snp | 15 | 43873489  | 43873489  | C | T |
| MEN0048G-P1 | STAB1        | snp | 3  | 52556589  | 52556589  | T | C |
| MEN0048G-P1 | PXDNL        | snp | 8  | 52321350  | 52321350  | G | A |
| MEN0048G-P1 | TMCO4        | snp | 1  | 20066409  | 20066409  | C | T |
| MEN0048G-P1 | STARD10      | snp | 11 | 72466113  | 72466113  | C | T |
| MEN0048G-P1 | RP11-830F9.6 | snp | 16 | 89017349  | 89017349  | G | C |
| MEN0048G-P1 | DLG1         | snp | 3  | 196803489 | 196803489 | T | G |
| MEN0048G-P1 | ZNF548       | snp | 19 | 57911082  | 57911082  | C | T |
| MEN0048G-P1 | PLXNC1       | snp | 12 | 94543046  | 94543046  | G | T |
| MEN0048G-P1 | ALDOA        | snp | 16 | 30080970  | 30080970  | C | T |
| MEN0048G-P1 | DDX11        | snp | 12 | 31242911  | 31242911  | C | T |
| MEN0048G-P1 | GLP2R        | snp | 17 | 9764491   | 9764491   | G | A |
| MEN0048G-P1 | SLC25A6      | snp | X  | 1506303   | 1506303   | G | T |
| MEN0048G-P1 | AL133481.1   | snp | 10 | 81266819  | 81266819  | G | A |
| MEN0048G-P1 | BRINP3       | snp | 1  | 190067216 | 190067216 | C | A |
| MEN0048G-P1 | SMARCA2      | snp | 9  | 2123887   | 2123887   | C | T |
| MEN0048G-P1 | SWT1         | snp | 1  | 185173912 | 185173912 | G | C |
| MEN0048G-P1 | ACSL6        | snp | 5  | 131308476 | 131308476 | G | A |

|             |              |     |    |           |           |   |   |
|-------------|--------------|-----|----|-----------|-----------|---|---|
| MEN0048G-P1 | CREBZF       | snp | 11 | 85375769  | 85375769  | G | A |
| MEN0048G-P1 | S100P        | snp | 4  | 6695670   | 6695670   | T | G |
| MEN0048G-P1 | WDR90        | snp | 16 | 708627    | 708627    | G | A |
| MEN0048G-P1 | LOXL2        | snp | 8  | 23225710  | 23225710  | T | C |
| MEN0048G-P1 | COBL         | snp | 7  | 51150806  | 51150806  | T | A |
| MEN0048G-P1 | THOC2        | snp | X  | 122774430 | 122774430 | C | A |
| MEN0048G-P1 | ANKRD30B     | snp | 18 | 14850328  | 14850328  | A | G |
| MEN0048G-P1 | NCKAP5       | snp | 2  | 133540236 | 133540236 | G | C |
| MEN0048G-P1 | CCDC150      | snp | 2  | 197586376 | 197586376 | A | T |
| MEN0048G-P1 | PLD5         | snp | 1  | 242253187 | 242253187 | T | A |
| MEN0048G-P1 | MYH13        | snp | 17 | 10214514  | 10214514  | G | C |
| MEN0048G-P1 | MYOF         | snp | 10 | 95169490  | 95169490  | C | A |
| MEN0048G-P1 | FZD8         | snp | 10 | 35930289  | 35930289  | G | C |
| MEN0048G-P1 | UTS2R        | snp | 17 | 80332919  | 80332919  | G | A |
| MEN0048G-P1 | MAL          | snp | 2  | 95719159  | 95719159  | G | T |
| MEN0048G-P1 | CRAMP1L      | snp | 16 | 1705221   | 1705221   | A | G |
| MEN0048G-P1 | BTK          | snp | X  | 100609669 | 100609669 | C | G |
| MEN0048G-P1 | COBL         | snp | 7  | 51150806  | 51150806  | T | A |
| MEN0048G-P1 | CREBZF       | snp | 11 | 85375769  | 85375769  | G | A |
| MEN0048G-P1 | ELN          | snp | 7  | 73450900  | 73450900  | C | A |
| MEN0048G-P1 | LOXL2        | snp | 8  | 23225710  | 23225710  | T | C |
| MEN0048G-P1 | NBAS         | snp | 2  | 15326889  | 15326889  | T | C |
| MEN0048G-P1 | BRWD1        | snp | 21 | 40559073  | 40559073  | A | C |
| MEN0048G-P1 | AGL          | snp | 1  | 100356880 | 100356880 | C | T |
| MEN0048G-P1 | ALDOA        | snp | 16 | 30080970  | 30080970  | C | T |
| MEN0048G-P1 | CHP2         | snp | 16 | 23767187  | 23767187  | A | T |
| MEN0048G-P1 | SOWAHD       | snp | X  | 118893556 | 118893556 | T | G |
| MEN0048G-P1 | TMCO4        | snp | 1  | 20066409  | 20066409  | C | T |
| MEN0048G-P1 | RUNX2        | snp | 6  | 45514792  | 45514792  | C | G |
| MEN0048G-P1 | HELZ2        | snp | 20 | 62195972  | 62195972  | C | A |
| MEN0048G-P1 | LRTM2        | snp | 12 | 1940319   | 1940319   | C | T |
| MEN0048G-P1 | ACSL6        | snp | 5  | 131308476 | 131308476 | G | A |
| MEN0048G-P1 | PLXNC1       | snp | 12 | 94543046  | 94543046  | G | T |
| MEN0048G-P1 | DLG1         | snp | 3  | 196803489 | 196803489 | T | G |
| MEN0048G-P1 | BRINP3       | snp | 1  | 190067216 | 190067216 | C | A |
| MEN0048G-P1 | PHYKPL       | snp | 5  | 177651695 | 177651695 | A | C |
| MEN0048G-P1 | STARD10      | snp | 11 | 72466113  | 72466113  | C | T |
| MEN0048G-P1 | PLD5         | snp | 1  | 242253187 | 242253187 | T | A |
| MEN0048G-P1 | SWT1         | snp | 1  | 185173912 | 185173912 | G | C |
| MEN0048G-P1 | CAMSAP3      | snp | 19 | 7671226   | 7671226   | G | A |
| MEN0048G-P1 | DDX11        | snp | 12 | 31242911  | 31242911  | C | T |
| MEN0048G-P1 | ARHGEF5      | snp | 7  | 144061047 | 144061047 | A | G |
| MEN0048G-P1 | RP11-830F9.6 | snp | 16 | 89017349  | 89017349  | G | C |
| MEN0048G-P1 | WDR90        | snp | 16 | 708627    | 708627    | G | A |
| MEN0048G-P1 | STAB1        | snp | 3  | 52556589  | 52556589  | T | C |
| MEN0048G-P1 | EYS          | snp | 6  | 66005780  | 66005780  | G | A |
| MEN0048G-P1 | AL133481.1   | snp | 10 | 81266819  | 81266819  | G | A |



|             |          |     |    |           |           |   |   |
|-------------|----------|-----|----|-----------|-----------|---|---|
| MEN0048G-P1 | YIPF7    | snp | 4  | 44631547  | 44631547  | T | C |
| MEN0048G-P1 | MYOF     | snp | 10 | 95169490  | 95169490  | C | A |
| MEN0048G-P1 | HAO2     | snp | 1  | 119936413 | 119936413 | C | T |
| MEN0048G-P1 | THOC2    | snp | X  | 122774430 | 122774430 | C | A |
| MEN0048G-P1 | BEST3    | snp | 12 | 70049318  | 70049318  | C | A |
| MEN0048G-P1 | ELOVL5   | snp | 6  | 53156637  | 53156637  | G | C |
| MEN0048G-P1 | SLC25A6  | snp | X  | 1506303   | 1506303   | G | T |
| MEN0048G-P1 | RAB6C    | snp | 2  | 130738031 | 130738031 | A | G |
| MEN0048G-P1 | KMT2C    | snp | 7  | 151874763 | 151874763 | T | C |
| MEN0048G-P1 | PPIP5K1  | snp | 15 | 43873489  | 43873489  | C | T |
| MEN0048G-P1 | FANCD2   | snp | 3  | 10114557  | 10114557  | A | G |
| MEN0048G-P1 | SHROOM4  | snp | X  | 50377185  | 50377185  | G | A |
| MEN0048G-P1 | CCDC132  | snp | 7  | 92985368  | 92985368  | G | A |
| MEN0048G-P1 | PXDNL    | snp | 8  | 52321350  | 52321350  | G | A |
| MEN0048G-P1 | CACNA1B  | snp | 9  | 140919411 | 140919411 | C | A |
| MEN0048G-P1 | GLP2R    | snp | 17 | 9764491   | 9764491   | G | A |
| MEN0048G-P1 | KDM5C    | snp | X  | 53228235  | 53228235  | C | A |
| MEN0048G-P1 | S100P    | snp | 4  | 6695670   | 6695670   | T | G |
| MEN0048G-P1 | PAPPA2   | snp | 1  | 176681002 | 176681002 | A | C |
| MEN0048G-P1 | ZNF548   | snp | 19 | 57911082  | 57911082  | C | T |
| MEN0048G-P1 | SMARCA2  | snp | 9  | 2123887   | 2123887   | C | T |
| MEN0048G-P1 | TP53     | snp | 17 | 7578371   | 7578371   | C | T |
| MEN0048G-P1 | STON2    | snp | 14 | 81744954  | 81744954  | G | T |
| MEN0048G-P1 | MPP1     | snp | X  | 154020552 | 154020552 | C | A |
| MEN0048G-P1 | ANKRD30B | snp | 18 | 14850328  | 14850328  | A | G |
| MEN0048G-P1 | NCKAP5   | snp | 2  | 133540236 | 133540236 | G | C |
| MEN0048G-P1 | MYH13    | snp | 17 | 10214514  | 10214514  | G | C |
| MEN0048G-P1 | CCDC150  | snp | 2  | 197586376 | 197586376 | A | T |
| MEN0088-P   | RGCC     | snp | 13 | 42032497  | 42032497  | C | A |
| MEN0088-P   | FAT1     | snp | 4  | 187628667 | 187628667 | C | T |
| MEN0088-P   | TSPAN8   | snp | 12 | 71531816  | 71531816  | G | C |
| MEN0088-P   | KIAA0586 | snp | 14 | 58896146  | 58896146  | G | A |
| MEN0088-P   | CNOT1    | snp | 16 | 58615279  | 58615279  | T | C |
| MEN0088-P   | BRMS1L   | snp | 14 | 36333076  | 36333076  | A | T |
| MEN0088-P   | PAPOLA   | snp | 14 | 97022210  | 97022210  | C | G |
| MEN0088-P   | ZFPM2    | snp | 8  | 106813476 | 106813476 | G | A |
| MEN0088-P   | PIK3C2G  | snp | 12 | 18719987  | 18719987  | C | A |
| MEN0088-P   | LRP5     | snp | 11 | 68133075  | 68133075  | C | A |
| MEN0088-P   | ITM2B    | snp | 13 | 48828029  | 48828029  | T | C |
| MEN0088-P   | ZMYM2    | snp | 13 | 20580650  | 20580650  | C | T |
| MEN0088-P   | KIF13B   | snp | 8  | 28956724  | 28956724  | G | T |
| MEN0088-P   | SCARB1   | snp | 12 | 125284768 | 125284768 | G | T |
| MEN0088-P   | TSPAN8   | snp | 12 | 71531804  | 71531804  | T | C |
| MEN0088-P   | DNAH8    | snp | 6  | 38866058  | 38866058  | G | C |
| MEN0088-P   | MYH3     | snp | 17 | 10542890  | 10542890  | G | A |
| MEN0088-P   | SDK2     | snp | 17 | 71334898  | 71334898  | G | T |
| MEN0088-P   | NCOA2    | snp | 8  | 71057051  | 71057051  | T | A |

|           |          |     |    |           |           |   |   |
|-----------|----------|-----|----|-----------|-----------|---|---|
| MEN0088-P | SPINK14  | snp | 5  | 147553857 | 147553857 | C | T |
| MEN0088-P | FAM126A  | snp | 7  | 23017031  | 23017031  | C | T |
| MEN0088-P | KIF13B   | snp | 8  | 28956724  | 28956724  | G | T |
| MEN0088-P | ITM2B    | snp | 13 | 48828029  | 48828029  | T | C |
| MEN0088-P | SCARB1   | snp | 12 | 125284768 | 125284768 | G | T |
| MEN0088-P | PAPOLA   | snp | 14 | 97022210  | 97022210  | C | G |
| MEN0088-P | FAT1     | snp | 4  | 187628667 | 187628667 | C | T |
| MEN0088-P | CNOT1    | snp | 16 | 58615279  | 58615279  | T | C |
| MEN0088-P | DNAH8    | snp | 6  | 38866058  | 38866058  | G | C |
| MEN0088-P | FAM126A  | snp | 7  | 23017031  | 23017031  | C | T |
| MEN0088-P | KIAA0586 | snp | 14 | 58896146  | 58896146  | G | A |
| MEN0088-P | RGCC     | snp | 13 | 42032497  | 42032497  | C | A |
| MEN0088-P | PIK3C2G  | snp | 12 | 18719987  | 18719987  | C | A |
| MEN0088-P | LRP5     | snp | 11 | 68133075  | 68133075  | C | A |
| MEN0088-P | TSPAN8   | snp | 12 | 71531816  | 71531816  | G | C |
| MEN0088-P | NCOA2    | snp | 8  | 71057051  | 71057051  | T | A |
| MEN0088-P | SPINK14  | snp | 5  | 147553857 | 147553857 | C | T |
| MEN0088-P | MYH3     | snp | 17 | 10542890  | 10542890  | G | A |
| MEN0088-P | ZMYM2    | snp | 13 | 20580650  | 20580650  | C | T |
| MEN0088-P | BRMS1L   | snp | 14 | 36333076  | 36333076  | A | T |
| MEN0088-P | ZFPM2    | snp | 8  | 106813476 | 106813476 | G | A |
| MEN0088-P | SDK2     | snp | 17 | 71334898  | 71334898  | G | T |
| MEN0089-P | GABRR1   | snp | 6  | 89891668  | 89891668  | G | T |
| MEN0089-P | CRLF2    | snp | X  | 1331472   | 1331472   | A | T |
| MEN0089-P | NDST3    | snp | 4  | 119064828 | 119064828 | G | A |
| MEN0089-P | TOP1MT   | snp | 8  | 144406252 | 144406252 | T | C |
| MEN0089-P | MOGAT3   | snp | 7  | 100839217 | 100839217 | G | A |
| MEN0089-P | TBC1D7   | snp | 6  | 13306650  | 13306650  | T | C |
| MEN0089-P | MAP3K4   | snp | 6  | 161519378 | 161519378 | C | T |
| MEN0089-P | MCRS1    | snp | 12 | 49953267  | 49953267  | C | T |
| MEN0089-P | MRM1     | snp | 17 | 34958469  | 34958469  | G | A |
| MEN0089-P | ANKRD36C | snp | 2  | 96593016  | 96593016  | C | A |
| MEN0089-P | ZBTB8A   | snp | 1  | 33058651  | 33058651  | A | T |
| MEN0089-P | ANKRD36C | snp | 2  | 96593025  | 96593025  | C | T |
| MEN0089-P | CACNA1E  | snp | 1  | 181702087 | 181702087 | A | T |
| MEN0089-P | AASDH    | snp | 4  | 57209798  | 57209798  | G | A |
| MEN0089-P | PLEKHH1  | snp | 14 | 68029583  | 68029583  | C | T |
| MEN0089-P | AKIRIN1  | snp | 1  | 39469053  | 39469053  | T | G |
| MEN0089-P | CNTN6    | snp | 3  | 1415294   | 1415294   | C | A |
| MEN0089-P | ANKRD36C | snp | 2  | 96593000  | 96593000  | A | G |
| MEN0089-P | TP53BP2  | snp | 1  | 223992037 | 223992037 | T | G |
| MEN0089-P | PRB1     | snp | 12 | 11506852  | 11506852  | G | T |
| MEN0089-P | ZNF737   | snp | 19 | 20728095  | 20728095  | A | C |
| MEN0089-P | PCDHGA11 | snp | 5  | 140802401 | 140802401 | G | A |
| MEN0089-P | MCRS1    | snp | 12 | 49953267  | 49953267  | C | T |
| MEN0089-P | MAP3K4   | snp | 6  | 161519378 | 161519378 | C | T |
| MEN0089-P | ZBTB8A   | snp | 1  | 33058651  | 33058651  | A | T |

|           |          |     |    |           |           |   |   |
|-----------|----------|-----|----|-----------|-----------|---|---|
| MEN0089-P | GABRR1   | snp | 6  | 89891668  | 89891668  | G | T |
| MEN0089-P | AASDH    | snp | 4  | 57209798  | 57209798  | G | A |
| MEN0089-P | MRM1     | snp | 17 | 34958469  | 34958469  | G | A |
| MEN0089-P | TBC1D7   | snp | 6  | 13306650  | 13306650  | T | C |
| MEN0089-P | NDST3    | snp | 4  | 119064828 | 119064828 | G | A |
| MEN0089-P | ANKRD36C | snp | 2  | 96593025  | 96593025  | C | T |
| MEN0089-P | PLEKHH1  | snp | 14 | 68029583  | 68029583  | C | T |
| MEN0089-P | MOGAT3   | snp | 7  | 100839217 | 100839217 | G | A |
| MEN0089-P | CRLF2    | snp | X  | 1331472   | 1331472   | A | T |
| MEN0089-P | AKIRIN1  | snp | 1  | 39469053  | 39469053  | T | G |
| MEN0089-P | ANKRD36C | snp | 2  | 96593016  | 96593016  | C | A |
| MEN0089-P | ZNF737   | snp | 19 | 20728095  | 20728095  | A | C |
| MEN0089-P | CNTN6    | snp | 3  | 1415294   | 1415294   | C | A |
| MEN0089-P | TOP1MT   | snp | 8  | 144406252 | 144406252 | T | C |
| MEN0089-P | PCDHGA11 | snp | 5  | 140802401 | 140802401 | G | A |
| MEN0089-P | TP53BP2  | snp | 1  | 223992037 | 223992037 | T | G |
| MEN0089-P | CACNA1E  | snp | 1  | 181702087 | 181702087 | A | T |
| MEN0089-P | ANKRD36C | snp | 2  | 96593000  | 96593000  | A | G |
| MEN0089-P | PRB1     | snp | 12 | 11506852  | 11506852  | G | T |
| MEN0092-P | TTLL9    | snp | 20 | 30510805  | 30510805  | G | A |
| MEN0092-P | PTPRF    | snp | 1  | 44069494  | 44069494  | C | T |
| MEN0092-P | PKMYT1   | snp | 16 | 3029649   | 3029649   | G | A |
| MEN0092-P | ERVFRD-1 | snp | 6  | 11104921  | 11104921  | C | T |
| MEN0092-P | SPEG     | snp | 2  | 220353850 | 220353850 | G | A |
| MEN0092-P | HERC4    | snp | 10 | 69684875  | 69684875  | C | T |
| MEN0092-P | SLC35G2  | snp | 3  | 136573405 | 136573405 | G | A |
| MEN0092-P | TMEM108  | snp | 3  | 133098626 | 133098626 | C | T |
| MEN0092-P | PSMB11   | snp | 14 | 23512003  | 23512003  | G | A |
| MEN0092-P | TMOD1    | snp | 9  | 100328233 | 100328233 | C | T |
| MEN0092-P | SCMH1    | snp | 1  | 41617308  | 41617308  | G | A |
| MEN0092-P | MAST1    | snp | 19 | 12981886  | 12981886  | G | A |
| MEN0092-P | USP35    | snp | 11 | 77907340  | 77907340  | G | A |
| MEN0092-P | EPPK1    | snp | 8  | 144946755 | 144946755 | C | T |
| MEN0092-P | PLXNA1   | snp | 3  | 126708188 | 126708188 | G | A |
| MEN0092-P | KAT2A    | snp | 17 | 40265767  | 40265767  | C | T |
| MEN0092-P | TRAP1    | snp | 16 | 3727532   | 3727532   | G | A |
| MEN0092-P | PTPN14   | snp | 1  | 214549666 | 214549666 | C | T |
| MEN0092-P | AOC2     | snp | 17 | 41001304  | 41001304  | G | A |
| MEN0092-P | NPBWR2   | snp | 20 | 62737901  | 62737901  | G | A |
| MEN0092-P | PAXBP1   | snp | 21 | 34123491  | 34123491  | G | A |
| MEN0092-P | TBC1D9B  | snp | 5  | 179305326 | 179305326 | T | C |
| MEN0092-P | POM121   | snp | 7  | 72398987  | 72398987  | G | A |
| MEN0092-P | SDPR     | snp | 2  | 192701100 | 192701100 | G | A |
| MEN0092-P | LNPEP    | snp | 5  | 96315595  | 96315595  | C | T |
| MEN0092-P | SEC16B   | snp | 1  | 177911150 | 177911150 | C | T |
| MEN0092-P | C1orf222 | snp | 1  | 1854450   | 1854450   | G | A |
| MEN0092-P | CENPI    | snp | X  | 100403130 | 100403130 | G | A |

|           |         |     |    |           |           |   |   |
|-----------|---------|-----|----|-----------|-----------|---|---|
| MEN0092-P | KCNJ11  | snp | 11 | 17408540  | 17408540  | G | A |
| MEN0092-P | ZNFX1   | snp | 20 | 47879939  | 47879939  | G | A |
| MEN0092-P | INTS3   | snp | 1  | 153742266 | 153742266 | G | A |
| MEN0092-P | PPP2R2B | snp | 5  | 145972609 | 145972609 | C | T |
| MEN0092-P | GLYR1   | snp | 16 | 4861768   | 4861768   | C | T |
| MEN0092-P | NOD2    | snp | 16 | 50746064  | 50746064  | G | A |
| MEN0092-P | NOS1AP  | snp | 1  | 162336911 | 162336911 | C | T |
| MEN0092-P | ERN1    | snp | 17 | 62121527  | 62121527  | G | A |
| MEN0092-P | DYRK2   | snp | 12 | 68051937  | 68051937  | C | T |
| MEN0092-P | NLRX1   | snp | 11 | 119045909 | 119045909 | G | A |
| MEN0092-P | RAPGEF6 | snp | 5  | 130840366 | 130840366 | G | A |
| MEN0092-P | MYH1    | snp | 17 | 10419567  | 10419567  | C | A |
| MEN0092-P | UNC5B   | snp | 10 | 73050713  | 73050713  | G | A |
| MEN0092-P | SMARCA4 | snp | 19 | 11132465  | 11132465  | C | T |
| MEN0092-P | NFIC    | snp | 19 | 3382127   | 3382127   | C | T |
| MEN0092-P | NEB     | snp | 2  | 152381087 | 152381087 | G | C |
| MEN0092-P | TRIM46  | snp | 1  | 155152396 | 155152396 | C | T |
| MEN0092-P | MARCO   | snp | 2  | 119750856 | 119750856 | C | T |
| MEN0092-P | RAPGEF4 | snp | 2  | 173901401 | 173901401 | T | C |
| MEN0092-P | SLIT2   | snp | 4  | 20533609  | 20533609  | G | A |
| MEN0092-P | ARNTL   | snp | 11 | 13375965  | 13375965  | G | A |
| MEN0092-P | TEP1    | snp | 14 | 20869673  | 20869673  | A | G |
| MEN0092-P | ZNF77   | snp | 19 | 2933957   | 2933957   | C | T |
| MEN0092-P | ZNF716  | snp | 7  | 57510026  | 57510026  | G | A |
| MEN0092-P | TNXB    | snp | 6  | 32037369  | 32037369  | C | T |
| MEN0092-P | LHFPL5  | snp | 6  | 35773661  | 35773661  | G | A |
| MEN0092-P | FRK     | snp | 6  | 116264287 | 116264287 | G | A |
| MEN0092-P | THOC6   | snp | 16 | 3077247   | 3077247   | C | T |
| MEN0092-P | TCTN2   | snp | 12 | 124175110 | 124175110 | G | A |
| MEN0092-P | RGAG1   | snp | X  | 109697237 | 109697237 | C | T |
| MEN0092-P | PSG4    | snp | 19 | 43708038  | 43708038  | G | A |
| MEN0092-P | TBKBP1  | snp | 17 | 45785806  | 45785806  | C | T |
| MEN0092-P | ZFHX4   | snp | 8  | 77616634  | 77616634  | G | A |
| MEN0092-P | VPS13A  | snp | 9  | 79981670  | 79981670  | G | A |
| MEN0092-P | RBBP6   | snp | 16 | 24578601  | 24578601  | C | T |
| MEN0092-P | COPB2   | snp | 3  | 139078167 | 139078167 | G | A |
| MEN0092-P | GRIA3   | snp | X  | 122538739 | 122538739 | G | A |
| MEN0092-P | FLG     | snp | 1  | 152277116 | 152277116 | C | T |
| MEN0092-P | NID1    | snp | 1  | 236176855 | 236176855 | C | T |
| MEN0092-P | HRH3    | snp | 20 | 60791370  | 60791370  | A | C |
| MEN0092-P | WDR11   | snp | 10 | 122668104 | 122668104 | G | A |
| MEN0092-P | POLQ    | snp | 3  | 121208882 | 121208882 | T | C |
| MEN0092-P | LYRM5   | snp | 12 | 25357101  | 25357101  | A | C |
| MEN0092-P | RYR3    | snp | 15 | 33926811  | 33926811  | C | T |
| MEN0092-P | SAMD4A  | snp | 14 | 55243178  | 55243178  | G | A |
| MEN0092-P | OR5B21  | snp | 11 | 58275329  | 58275329  | G | A |
| MEN0092-P | SON     | snp | 21 | 34931986  | 34931986  | G | A |

|           |          |     |    |           |           |   |   |
|-----------|----------|-----|----|-----------|-----------|---|---|
| MEN0092-P | PRC1     | snp | 15 | 91517428  | 91517428  | C | T |
| MEN0092-P | DLGAP1   | snp | 18 | 3879539   | 3879539   | C | T |
| MEN0092-P | EML1     | snp | 14 | 100377846 | 100377846 | C | T |
| MEN0092-P | IQSEC3   | snp | 12 | 247481    | 247481    | G | A |
| MEN0092-P | SLC32A1  | snp | 20 | 37356192  | 37356192  | G | A |
| MEN0092-P | HERC1    | snp | 15 | 63933709  | 63933709  | C | T |
| MEN0092-P | ESR2     | snp | 14 | 64701701  | 64701701  | C | T |
| MEN0092-P | HTR2B    | snp | 2  | 231974117 | 231974117 | G | T |
| MEN0092-P | LPAR6    | snp | 13 | 48986021  | 48986021  | T | G |
| MEN0092-P | CYTH4    | snp | 22 | 37709494  | 37709494  | G | A |
| MEN0092-P | TNXB     | snp | 6  | 32010287  | 32010287  | C | T |
| MEN0092-P | KIAA1683 | snp | 19 | 18376965  | 18376965  | G | T |
| MEN0092-P | RNF38    | snp | 9  | 36352824  | 36352824  | G | A |
| MEN0092-P | KLC2     | snp | 11 | 66030380  | 66030380  | G | A |
| MEN0092-P | ATP2A1   | snp | 16 | 28911947  | 28911947  | C | T |
| MEN0092-P | CEP63    | snp | 3  | 134268018 | 134268018 | G | T |
| MEN0092-P | NCAPH2   | snp | 22 | 50956007  | 50956007  | C | T |
| MEN0092-P | POM121C  | snp | 7  | 75050828  | 75050828  | C | T |
| MEN0092-P | RTN2     | snp | 19 | 45998201  | 45998201  | C | T |
| MEN0092-P | MRPS10   | snp | 6  | 42185554  | 42185554  | G | A |
| MEN0092-P | AIF1     | snp | 6  | 31583916  | 31583916  | G | A |
| MEN0092-P | POLR3E   | snp | 16 | 22335966  | 22335966  | C | T |
| MEN0092-P | RICTOR   | snp | 5  | 38950324  | 38950324  | G | A |
| MEN0092-P | TTN      | snp | 2  | 179464170 | 179464170 | G | A |
| MEN0092-P | HIVEP1   | snp | 6  | 12122908  | 12122908  | G | C |
| MEN0092-P | MRGPRX1  | snp | 11 | 18955875  | 18955875  | G | A |
| MEN0092-P | POLR2A   | snp | 17 | 7406782   | 7406782   | G | A |
| MEN0092-P | TMC1     | snp | 9  | 75406943  | 75406943  | G | A |
| MEN0092-P | GPR52    | snp | 1  | 174417941 | 174417941 | G | A |
| MEN0092-P | ZNF830   | snp | 17 | 33289525  | 33289525  | T | C |
| MEN0092-P | B9D1     | snp | 17 | 19263657  | 19263657  | G | A |
| MEN0092-P | PARD3B   | snp | 2  | 206037007 | 206037007 | G | A |
| MEN0092-P | FCGBP    | snp | 19 | 40364333  | 40364333  | C | T |
| MEN0092-P | PALLD    | snp | 4  | 169433059 | 169433059 | G | A |
| MEN0092-P | KLF7     | snp | 2  | 207988551 | 207988551 | C | T |
| MEN0092-P | SLC47A1  | snp | 17 | 19480670  | 19480670  | C | T |
| MEN0092-P | P2RX4    | snp | 12 | 121666668 | 121666668 | A | C |
| MEN0092-P | SLC6A16  | snp | 19 | 49812145  | 49812145  | C | T |
| MEN0092-P | KIAA1683 | snp | 19 | 18376959  | 18376959  | G | C |
| MEN0092-P | POLE     | snp | 12 | 133225558 | 133225558 | T | C |
| MEN0092-P | NOS1AP   | snp | 1  | 162313643 | 162313643 | G | A |
| MEN0092-P | MSTO1    | snp | 1  | 155717640 | 155717640 | C | T |
| MEN0092-P | GBAS     | snp | 7  | 56065092  | 56065092  | G | A |
| MEN0092-P | LIMK1    | snp | 7  | 73523341  | 73523341  | C | T |
| MEN0092-P | FBXL3    | snp | 13 | 77595741  | 77595741  | C | G |
| MEN0092-P | HEBP1    | snp | 12 | 13128363  | 13128363  | C | T |
| MEN0092-P | FGD2     | snp | 6  | 36982782  | 36982782  | C | T |

|           |          |     |    |           |           |   |   |
|-----------|----------|-----|----|-----------|-----------|---|---|
| MEN0092-P | PAM      | snp | 5  | 102364747 | 102364747 | C | T |
| MEN0092-P | NOS1AP   | snp | 1  | 162335254 | 162335254 | C | T |
| MEN0092-P | CEACAM5  | snp | 19 | 42213763  | 42213763  | C | T |
| MEN0092-P | MYOG     | snp | 1  | 203054890 | 203054890 | G | A |
| MEN0092-P | KALRN    | snp | 3  | 124193577 | 124193577 | T | C |
| MEN0092-P | PACS1    | snp | 11 | 66000525  | 66000525  | G | A |
| MEN0092-P | TRIM48   | snp | 11 | 55035844  | 55035844  | T | C |
| MEN0092-P | MRPL54   | snp | 19 | 3767338   | 3767338   | C | T |
| MEN0092-P | ZNF213   | snp | 16 | 3189049   | 3189049   | G | A |
| MEN0092-P | CA14     | snp | 1  | 150233929 | 150233929 | A | G |
| MEN0092-P | FOPNL    | snp | 16 | 15967450  | 15967450  | G | A |
| MEN0092-P | ME3      | snp | 11 | 86209022  | 86209022  | C | A |
| MEN0092-P | TCHH     | snp | 1  | 152080468 | 152080468 | C | T |
| MEN0092-P | MTSS1L   | snp | 16 | 70712220  | 70712220  | G | A |
| MEN0092-P | EGR2     | snp | 10 | 64573434  | 64573434  | T | C |
| MEN0092-P | IL2RG    | snp | X  | 70330402  | 70330402  | G | A |
| MEN0092-P | MAPK7    | snp | 17 | 19285573  | 19285573  | G | A |
| MEN0092-P | ATP2B2   | snp | 3  | 10417322  | 10417322  | A | G |
| MEN0092-P | AP2M1    | snp | 3  | 183899704 | 183899704 | C | T |
| MEN0092-P | LHFPL5   | snp | 6  | 35773526  | 35773526  | G | A |
| MEN0092-P | HS3ST4   | snp | 16 | 26147180  | 26147180  | T | A |
| MEN0092-P | MACF1    | snp | 1  | 39900201  | 39900201  | A | G |
| MEN0092-P | PCDHA8   | snp | 5  | 140222585 | 140222585 | A | G |
| MEN0092-P | RNF213   | snp | 17 | 78350306  | 78350306  | C | A |
| MEN0092-P | LRR37B   | snp | 17 | 30349744  | 30349744  | G | A |
| MEN0092-P | SLC16A7  | snp | 12 | 60168915  | 60168915  | A | G |
| MEN0092-P | SIRPD    | snp | 20 | 1532445   | 1532445   | G | A |
| MEN0092-P | SULT1C2  | snp | 2  | 108910769 | 108910769 | G | A |
| MEN0092-P | CSNK1G2  | snp | 19 | 1979048   | 1979048   | C | T |
| MEN0092-P | ARHGAP5  | snp | 14 | 32561286  | 32561286  | A | G |
| MEN0092-P | DHRS4L2  | snp | 14 | 24464325  | 24464325  | G | A |
| MEN0092-P | HPD      | snp | 12 | 122281735 | 122281735 | G | A |
| MEN0092-P | PRADC1   | snp | 2  | 73456041  | 73456041  | G | A |
| MEN0092-P | HS3ST2   | snp | 16 | 22926383  | 22926383  | G | A |
| MEN0092-P | LRR1Q1   | snp | 12 | 85492270  | 85492270  | G | A |
| MEN0092-P | OR4N5    | snp | 14 | 20612564  | 20612564  | C | T |
| MEN0092-P | UHMK1    | snp | 1  | 162492234 | 162492234 | C | T |
| MEN0092-P | ADAMTS6  | snp | 5  | 64587158  | 64587158  | C | A |
| MEN0092-P | PHF20L1  | snp | 8  | 133790127 | 133790127 | G | C |
| MEN0092-P | CTCFL    | snp | 20 | 56089711  | 56089711  | C | T |
| MEN0092-P | RPUSD3   | snp | 3  | 9883915   | 9883915   | G | A |
| MEN0092-P | VARS2    | snp | 6  | 30889969  | 30889969  | G | A |
| MEN0092-P | BCL9     | snp | 1  | 147095868 | 147095868 | T | C |
| MEN0092-P | ARHGEF28 | snp | 5  | 73069856  | 73069856  | G | A |
| MEN0092-P | AGFG2    | snp | 7  | 100159983 | 100159983 | G | A |
| MEN0092-P | DEAF1    | snp | 11 | 654033    | 654033    | C | T |
| MEN0092-P | UHRF1BP1 | snp | 6  | 34826040  | 34826040  | G | A |

|           |          |     |    |           |           |   |   |
|-----------|----------|-----|----|-----------|-----------|---|---|
| MEN0092-P | MELK     | snp | 9  | 36651813  | 36651813  | G | A |
| MEN0092-P | EPHB3    | snp | 3  | 184294803 | 184294803 | G | A |
| MEN0092-P | MTFR1L   | snp | 1  | 26158495  | 26158495  | A | T |
| MEN0092-P | RMND5B   | snp | 5  | 177569902 | 177569902 | C | T |
| MEN0092-P | ZNF124   | snp | 1  | 247320487 | 247320487 | C | T |
| MEN0092-P | FBXW7    | snp | 4  | 153244137 | 153244137 | G | A |
| MEN0092-P | FAM110A  | snp | 20 | 826309    | 826309    | C | T |
| MEN0092-P | CYP4F22  | snp | 19 | 15659011  | 15659011  | C | T |
| MEN0092-P | ANAPC2   | snp | 9  | 140082048 | 140082048 | G | A |
| MEN0092-P | SMG8     | snp | 17 | 57290754  | 57290754  | G | A |
| MEN0092-P | BMP8B    | snp | 1  | 40229458  | 40229458  | C | T |
| MEN0092-P | TUBGCP5  | snp | 15 | 22855271  | 22855271  | A | G |
| MEN0092-P | ZC3H12B  | snp | X  | 64722658  | 64722658  | C | T |
| MEN0092-P | ZNF814   | snp | 19 | 58370321  | 58370321  | C | T |
| MEN0092-P | ZNF711   | snp | X  | 84510549  | 84510549  | G | A |
| MEN0092-P | SVEP1    | snp | 9  | 113173903 | 113173903 | C | T |
| MEN0092-P | ANKRD11  | snp | 16 | 89349513  | 89349513  | G | A |
| MEN0092-P | ZNF197   | snp | 3  | 44672663  | 44672663  | C | T |
| MEN0092-P | SLC17A5  | snp | 6  | 74354233  | 74354233  | G | A |
| MEN0092-P | NCAPG2   | snp | 7  | 158485620 | 158485620 | A | G |
| MEN0092-P | ABCA13   | snp | 7  | 48619942  | 48619942  | G | A |
| MEN0092-P | SCN9A    | snp | 2  | 167138287 | 167138287 | C | T |
| MEN0092-P | SELENBP1 | snp | 1  | 151341629 | 151341629 | C | T |
| MEN0092-P | TAS1R1   | snp | 1  | 6638842   | 6638842   | C | T |
| MEN0092-P | PSEN2    | snp | 1  | 227071448 | 227071448 | C | T |
| MEN0092-P | POLE     | snp | 12 | 133242014 | 133242014 | G | A |
| MEN0092-P | PLXNB1   | snp | 3  | 48455169  | 48455169  | G | A |
| MEN0092-P | FAM92B   | snp | 16 | 85143959  | 85143959  | C | T |
| MEN0092-P | ASTN2    | snp | 9  | 120053712 | 120053712 | C | T |
| MEN0092-P | PPFIA2   | snp | 12 | 81661851  | 81661851  | C | T |
| MEN0092-P | TRAF7    | snp | 16 | 2215894   | 2215894   | G | A |
| MEN0092-P | GPR124   | snp | 8  | 37690604  | 37690604  | G | A |
| MEN0092-P | CHRFAM7A | snp | 15 | 30665189  | 30665189  | T | C |
| MEN0092-P | CNTROB   | snp | 17 | 7843487   | 7843487   | G | A |
| MEN0092-P | MEGF8    | snp | 19 | 42866331  | 42866331  | G | A |
| MEN0092-P | LMNA     | snp | 1  | 156106150 | 156106150 | C | T |
| MEN0092-P | GLB1L3   | snp | 11 | 134182264 | 134182264 | G | A |
| MEN0092-P | MAML3    | snp | 4  | 140640790 | 140640790 | G | A |
| MEN0092-P | AMBN     | snp | 4  | 71472298  | 71472298  | G | A |
| MEN0092-P | EIF4G1   | snp | 3  | 184045188 | 184045188 | C | T |
| MEN0092-P | APBA1    | snp | 9  | 72131392  | 72131392  | C | A |
| MEN0092-P | APOBEC1  | snp | 12 | 7802175   | 7802175   | C | A |
| MEN0092-P | CGN      | snp | 1  | 151497279 | 151497279 | C | T |
| MEN0092-P | PAQR8    | snp | 6  | 52268016  | 52268016  | C | T |
| MEN0092-P | ZBTB3    | snp | 11 | 62520685  | 62520685  | C | T |
| MEN0092-P | ARHGEF15 | snp | 17 | 8215674   | 8215674   | G | A |
| MEN0092-P | SPNS1    | snp | 16 | 28993745  | 28993745  | G | A |

|           |            |     |            |           |           |   |   |
|-----------|------------|-----|------------|-----------|-----------|---|---|
| MEN0092-P | STAB1      | snp | 3          | 52548772  | 52548772  | C | T |
| MEN0092-P | ACTN2      | snp | 1          | 236902792 | 236902792 | A | G |
| MEN0092-P | MUC16      | snp | 19         | 9088981   | 9088981   | G | A |
| MEN0092-P | MON1B      | snp | 16         | 77228709  | 77228709  | C | T |
| MEN0092-P | IGLV1-47   | snp | 22         | 22712149  | 22712149  | G | A |
| MEN0092-P | ANKRD27    | snp | 19         | 33096776  | 33096776  | C | T |
| MEN0092-P | RSPH6A     | snp | 19         | 46299168  | 46299168  | C | T |
| MEN0092-P | SUSD1      | snp | 9          | 114904657 | 114904657 | T | C |
| MEN0092-P | RDX        | snp | 11         | 110102620 | 110102620 | G | A |
| MEN0092-P | SKIV2L     | snp | 6          | 31928014  | 31928014  | C | T |
| MEN0092-P | OR51E1     | snp | 11         | 4674445   | 4674445   | G | A |
| MEN0092-P | RRP36      | snp | 6          | 42995168  | 42995168  | G | A |
| MEN0092-P | RTP2       | snp | 3          | 187416659 | 187416659 | G | A |
| MEN0092-P | SATB1      | snp | 3          | 18462365  | 18462365  | C | T |
| MEN0092-P | UBE3B      | snp | 12         | 109962297 | 109962297 | G | A |
| MEN0092-P | RYR3       | snp | 15         | 33905485  | 33905485  | C | T |
| MEN0092-P | ATP13A3    | snp | 3          | 194152573 | 194152573 | A | G |
| MEN0092-P | PCDHGA3    | snp | 5          | 140725053 | 140725053 | G | A |
| MEN0092-P | CDH22      | snp | 20         | 44869727  | 44869727  | C | T |
| MEN0092-P | SMYD1      | snp | 2          | 88390585  | 88390585  | G | A |
| MEN0092-P | ANKS1A     | snp | 6          | 34937855  | 34937855  | C | A |
| MEN0092-P | KPNA2      | snp | 17         | 66040120  | 66040120  | G | A |
| MEN0092-P | ATG16L1    | snp | 2          | 234191397 | 234191397 | C | T |
| MEN0092-P | PRKCD      | snp | 3          | 53223986  | 53223986  | G | A |
| MEN0092-P | MRPL12     | snp | 17         | 79671425  | 79671425  | C | G |
| MEN0092-P | AGAP3      | snp | 7          | 150817156 | 150817156 | G | A |
| MEN0092-P | POTEC      | snp | 18         | 14513764  | 14513764  | C | T |
| MEN0092-P | SIPA1L2    | snp | 1          | 232551324 | 232551324 | C | T |
| MEN0092-P | AC011841.1 | snp | GL000205.1 | 117670    | 117670    | G | A |
| MEN0092-P | PROSER1    | snp | 13         | 39587833  | 39587833  | T | C |
| MEN0092-P | SLC35B3    | snp | 6          | 8420990   | 8420990   | C | T |
| MEN0092-P | CEP164     | snp | 11         | 117265848 | 117265848 | G | A |
| MEN0092-P | CDKN2C     | snp | 1          | 51436090  | 51436090  | A | G |
| MEN0092-P | ATOH8      | snp | 2          | 85991214  | 85991214  | A | G |
| MEN0092-P | ABCA7      | snp | 19         | 1051944   | 1051944   | G | A |
| MEN0092-P | ARID4B     | snp | 1          | 235345598 | 235345598 | T | C |
| MEN0092-P | ERVW-1     | snp | 7          | 92099356  | 92099356  | T | C |
| MEN0092-P | KRT83      | snp | 12         | 52714897  | 52714897  | C | T |
| MEN0092-P | STXBP1     | snp | 9          | 130438979 | 130438979 | G | C |
| MEN0092-P | OR2T8      | snp | 1          | 248084431 | 248084431 | T | C |
| MEN0092-P | TBCEL      | snp | 11         | 120918273 | 120918273 | G | A |
| MEN0092-P | CHRM4      | snp | 11         | 46407272  | 46407272  | G | A |
| MEN0092-P | CKAP5      | snp | 11         | 46780906  | 46780906  | T | C |
| MEN0092-P | FAT4       | snp | 4          | 126370710 | 126370710 | G | A |
| MEN0092-P | MDC1       | snp | 6          | 30680233  | 30680233  | C | T |
| MEN0092-P | CD163L1    | snp | 12         | 7526002   | 7526002   | G | A |
| MEN0092-P | PAF1       | snp | 19         | 39880295  | 39880295  | G | A |



|           |         |     |    |           |           |   |   |
|-----------|---------|-----|----|-----------|-----------|---|---|
| MEN0092-P | C9orf91 | snp | 9  | 117400932 | 117400932 | G | A |
| MEN0092-P | ITM2A   | snp | X  | 78618576  | 78618576  | G | A |
| MEN0092-P | CYP7B1  | snp | 8  | 65537091  | 65537091  | G | T |
| MEN0092-P | L1CAM   | snp | X  | 153135330 | 153135330 | G | A |
| MEN0092-P | TCHH    | snp | 1  | 152084615 | 152084615 | G | A |
| MEN0092-P | KCNH6   | snp | 17 | 61613276  | 61613276  | G | A |
| MEN0092-P | ETFB    | snp | 19 | 51857433  | 51857433  | C | T |
| MEN0092-P | SLC17A2 | snp | 6  | 25913553  | 25913553  | G | A |
| MEN0092-P | EXOC6   | snp | 10 | 94816757  | 94816757  | G | A |
| MEN0092-P | FLG     | snp | 1  | 152283466 | 152283466 | C | T |
| MEN0092-P | ADAMTS2 | snp | 5  | 178555047 | 178555047 | C | T |
| MEN0092-P | QSOX1   | snp | 1  | 180163518 | 180163518 | C | T |
| MEN0092-P | FGD1    | snp | X  | 54481902  | 54481902  | C | T |
| MEN0092-P | MYO5A   | snp | 15 | 52620191  | 52620191  | C | T |
| MEN0092-P | DSP     | snp | 6  | 7584886   | 7584886   | G | A |
| MEN0092-P | COLQ    | snp | 3  | 15529744  | 15529744  | G | A |
| MEN0092-P | RNF8    | snp | 6  | 37336499  | 37336499  | A | T |
| MEN0092-P | PTCH1   | snp | 9  | 98222052  | 98222052  | C | T |
| MEN0092-P | BRD4    | snp | 19 | 15349771  | 15349771  | G | A |
| MEN0092-P | EIF1AX  | snp | X  | 20148638  | 20148638  | T | C |
| MEN0092-P | ESR2    | snp | 14 | 64701701  | 64701701  | C | T |
| MEN0092-P | HS3ST2  | snp | 16 | 22926383  | 22926383  | G | A |
| MEN0092-P | FBXL3   | snp | 13 | 77595741  | 77595741  | C | G |
| MEN0092-P | FBXW7   | snp | 4  | 153244137 | 153244137 | G | A |
| MEN0092-P | PRKCD   | snp | 3  | 53223986  | 53223986  | G | A |
| MEN0092-P | LPAR6   | snp | 13 | 48986021  | 48986021  | T | G |
| MEN0092-P | NCAPG2  | snp | 7  | 158485620 | 158485620 | A | G |
| MEN0092-P | CENPI   | snp | X  | 100403130 | 100403130 | G | A |
| MEN0092-P | PSG4    | snp | 19 | 43708038  | 43708038  | G | A |
| MEN0092-P | TEP1    | snp | 14 | 20869673  | 20869673  | A | G |
| MEN0092-P | SEC16B  | snp | 1  | 177911150 | 177911150 | C | T |
| MEN0092-P | TRAF7   | snp | 16 | 2215894   | 2215894   | G | A |
| MEN0092-P | TBC1D9B | snp | 5  | 179305326 | 179305326 | T | C |
| MEN0092-P | B9D1    | snp | 17 | 19263657  | 19263657  | G | A |
| MEN0092-P | ANAPC2  | snp | 9  | 140082048 | 140082048 | G | A |
| MEN0092-P | KLF7    | snp | 2  | 207988551 | 207988551 | C | T |
| MEN0092-P | ASTN2   | snp | 9  | 120053712 | 120053712 | C | T |
| MEN0092-P | FAM92B  | snp | 16 | 85143959  | 85143959  | C | T |
| MEN0092-P | CYP7B1  | snp | 8  | 65537091  | 65537091  | G | T |
| MEN0092-P | POLR2A  | snp | 17 | 7406782   | 7406782   | G | A |
| MEN0092-P | OR2T8   | snp | 1  | 248084431 | 248084431 | T | C |
| MEN0092-P | TAS1R1  | snp | 1  | 6638842   | 6638842   | C | T |
| MEN0092-P | NOD2    | snp | 16 | 50746064  | 50746064  | G | A |
| MEN0092-P | POLE    | snp | 12 | 133225558 | 133225558 | T | C |
| MEN0092-P | ACTN2   | snp | 1  | 236902792 | 236902792 | A | G |
| MEN0092-P | SLC17A5 | snp | 6  | 74354233  | 74354233  | G | A |
| MEN0092-P | SLC17A5 | snp | 6  | 74354233  | 74354233  | G | A |

|           |          |     |    |           |           |   |   |
|-----------|----------|-----|----|-----------|-----------|---|---|
| MEN0092-P | LYRM5    | snp | 12 | 25357101  | 25357101  | A | C |
| MEN0092-P | MELK     | snp | 9  | 36651813  | 36651813  | G | A |
| MEN0092-P | TRIM48   | snp | 11 | 55035844  | 55035844  | T | C |
| MEN0092-P | MRPL12   | snp | 17 | 79671425  | 79671425  | C | G |
| MEN0092-P | HEBP1    | snp | 12 | 13128363  | 13128363  | C | T |
| MEN0092-P | AOC2     | snp | 17 | 41001304  | 41001304  | G | A |
| MEN0092-P | ZNF77    | snp | 19 | 2933957   | 2933957   | C | T |
| MEN0092-P | PTPRF    | snp | 1  | 44069494  | 44069494  | C | T |
| MEN0092-P | FAM110A  | snp | 20 | 826309    | 826309    | C | T |
| MEN0092-P | CYTH4    | snp | 22 | 37709494  | 37709494  | G | A |
| MEN0092-P | KLC2     | snp | 11 | 66030380  | 66030380  | G | A |
| MEN0092-P | HRH3     | snp | 20 | 60791370  | 60791370  | A | C |
| MEN0092-P | POLE     | snp | 12 | 133242014 | 133242014 | G | A |
| MEN0092-P | CDH22    | snp | 20 | 44869727  | 44869727  | C | T |
| MEN0092-P | PACS1    | snp | 11 | 66000525  | 66000525  | G | A |
| MEN0092-P | ATP2B2   | snp | 3  | 10417322  | 10417322  | A | G |
| MEN0092-P | MARCO    | snp | 2  | 119750856 | 119750856 | C | T |
| MEN0092-P | VPS13A   | snp | 9  | 79981670  | 79981670  | G | A |
| MEN0092-P | MON1B    | snp | 16 | 77228709  | 77228709  | C | T |
| MEN0092-P | THOC6    | snp | 16 | 3077247   | 3077247   | C | T |
| MEN0092-P | QSOX1    | snp | 1  | 180163518 | 180163518 | C | T |
| MEN0092-P | GPR52    | snp | 1  | 174417941 | 174417941 | G | A |
| MEN0092-P | PPFIA2   | snp | 12 | 81661851  | 81661851  | C | T |
| MEN0092-P | MTFR1L   | snp | 1  | 26158495  | 26158495  | A | T |
| MEN0092-P | SAMD4A   | snp | 14 | 55243178  | 55243178  | G | A |
| MEN0092-P | RNF213   | snp | 17 | 78350306  | 78350306  | C | A |
| MEN0092-P | PLXNA1   | snp | 3  | 126708188 | 126708188 | G | A |
| MEN0092-P | TNXB     | snp | 6  | 32037369  | 32037369  | C | T |
| MEN0092-P | SMARCA4  | snp | 19 | 11132465  | 11132465  | C | T |
| MEN0092-P | KCNJ11   | snp | 11 | 17408540  | 17408540  | G | A |
| MEN0092-P | PLXNB1   | snp | 3  | 48455169  | 48455169  | G | A |
| MEN0092-P | CTCFL    | snp | 20 | 56089711  | 56089711  | C | T |
| MEN0092-P | TMEM108  | snp | 3  | 133098626 | 133098626 | C | T |
| MEN0092-P | SELENBP1 | snp | 1  | 151341629 | 151341629 | C | T |
| MEN0092-P | AIF1     | snp | 6  | 31583916  | 31583916  | G | A |
| MEN0092-P | SPEG     | snp | 2  | 220353850 | 220353850 | G | A |
| MEN0092-P | CDKN2C   | snp | 1  | 51436090  | 51436090  | A | G |
| MEN0092-P | MRPL54   | snp | 19 | 3767338   | 3767338   | C | T |
| MEN0092-P | LHFPL5   | snp | 6  | 35773526  | 35773526  | G | A |
| MEN0092-P | NLRX1    | snp | 11 | 119045909 | 119045909 | G | A |
| MEN0092-P | PALLD    | snp | 4  | 169433059 | 169433059 | G | A |
| MEN0092-P | FRK      | snp | 6  | 116264287 | 116264287 | G | A |
| MEN0092-P | RAPGEF4  | snp | 2  | 173901401 | 173901401 | T | C |
| MEN0092-P | PKMYT1   | snp | 16 | 3029649   | 3029649   | G | A |
| MEN0092-P | ABCA7    | snp | 19 | 1051944   | 1051944   | G | A |
| MEN0092-P | RNF38    | snp | 9  | 36352824  | 36352824  | G | A |
| MEN0092-P | USP35    | snp | 11 | 77907340  | 77907340  | G | A |

|           |          |     |    |           |           |   |   |
|-----------|----------|-----|----|-----------|-----------|---|---|
| MEN0092-P | ZNF830   | snp | 17 | 33289525  | 33289525  | T | C |
| MEN0092-P | UHMK1    | snp | 1  | 162492234 | 162492234 | C | T |
| MEN0092-P | NOS1AP   | snp | 1  | 162313643 | 162313643 | G | A |
| MEN0092-P | HERC4    | snp | 10 | 69684875  | 69684875  | C | T |
| MEN0092-P | NOS1AP   | snp | 1  | 162335254 | 162335254 | C | T |
| MEN0092-P | ATOH8    | snp | 2  | 85991214  | 85991214  | A | G |
| MEN0092-P | HTR2B    | snp | 2  | 231974117 | 231974117 | G | T |
| MEN0092-P | APOBEC1  | snp | 12 | 7802175   | 7802175   | C | A |
| MEN0092-P | SKIV2L   | snp | 6  | 31928014  | 31928014  | C | T |
| MEN0092-P | SDPR     | snp | 2  | 192701100 | 192701100 | G | A |
| MEN0092-P | DSP      | snp | 6  | 7584886   | 7584886   | G | A |
| MEN0092-P | NCAPH2   | snp | 22 | 50956007  | 50956007  | C | T |
| MEN0092-P | LHFPL5   | snp | 6  | 35773661  | 35773661  | G | A |
| MEN0092-P | MYOG     | snp | 1  | 203054890 | 203054890 | G | A |
| MEN0092-P | TRAP1    | snp | 16 | 3727532   | 3727532   | G | A |
| MEN0092-P | CSNK1G2  | snp | 19 | 1979048   | 1979048   | C | T |
| MEN0092-P | PARD3B   | snp | 2  | 206037007 | 206037007 | G | A |
| MEN0092-P | RPUSD3   | snp | 3  | 9883915   | 9883915   | G | A |
| MEN0092-P | EGR2     | snp | 10 | 64573434  | 64573434  | T | C |
| MEN0092-P | TBKBP1   | snp | 17 | 45785806  | 45785806  | C | T |
| MEN0092-P | MAST1    | snp | 19 | 12981886  | 12981886  | G | A |
| MEN0092-P | UHRF1BP1 | snp | 6  | 34826040  | 34826040  | G | A |
| MEN0092-P | NPBWR2   | snp | 20 | 62737901  | 62737901  | G | A |
| MEN0092-P | ZBTB3    | snp | 11 | 62520685  | 62520685  | C | T |
| MEN0092-P | ZBTB3    | snp | 11 | 62520685  | 62520685  | C | T |
| MEN0092-P | HPD      | snp | 12 | 122281735 | 122281735 | G | A |
| MEN0092-P | MUC16    | snp | 19 | 9088981   | 9088981   | G | A |
| MEN0092-P | IQSEC3   | snp | 12 | 247481    | 247481    | G | A |
| MEN0092-P | EPPK1    | snp | 8  | 144946755 | 144946755 | C | T |
| MEN0092-P | MYH1     | snp | 17 | 10419567  | 10419567  | C | A |
| MEN0092-P | UNC5B    | snp | 10 | 73050713  | 73050713  | G | A |
| MEN0092-P | PHF20L1  | snp | 8  | 133790127 | 133790127 | G | C |
| MEN0092-P | MYO5A    | snp | 15 | 52620191  | 52620191  | C | T |
| MEN0092-P | SULT1C2  | snp | 2  | 108910769 | 108910769 | G | A |
| MEN0092-P | ABCA13   | snp | 7  | 48619942  | 48619942  | G | A |
| MEN0092-P | PPP2R2B  | snp | 5  | 145972609 | 145972609 | C | T |
| MEN0092-P | RNF8     | snp | 6  | 37336499  | 37336499  | A | T |
| MEN0092-P | ANKRD27  | snp | 19 | 33096776  | 33096776  | C | T |
| MEN0092-P | MRGPRX1  | snp | 11 | 18955875  | 18955875  | G | A |
| MEN0092-P | SPNS1    | snp | 16 | 28993745  | 28993745  | G | A |
| MEN0092-P | P2RX4    | snp | 12 | 121666668 | 121666668 | A | C |
| MEN0092-P | MAPK7    | snp | 17 | 19285573  | 19285573  | G | A |
| MEN0092-P | ATG16L1  | snp | 2  | 234191397 | 234191397 | C | T |
| MEN0092-P | SLC35G2  | snp | 3  | 136573405 | 136573405 | G | A |
| MEN0092-P | INTS3    | snp | 1  | 153742266 | 153742266 | G | A |
| MEN0092-P | SCMH1    | snp | 1  | 41617308  | 41617308  | G | A |
| MEN0092-P | SCMH1    | snp | 1  | 41617308  | 41617308  | G | A |

|           |         |     |    |           |           |   |   |
|-----------|---------|-----|----|-----------|-----------|---|---|
| MEN0092-P | SCMH1   | snp | 1  | 41617308  | 41617308  | G | A |
| MEN0092-P | SCMH1   | snp | 1  | 41617308  | 41617308  | G | A |
| MEN0092-P | SCMH1   | snp | 1  | 41617308  | 41617308  | G | A |
| MEN0092-P | PAQR8   | snp | 6  | 52268016  | 52268016  | C | T |
| MEN0092-P | PTPN14  | snp | 1  | 214549666 | 214549666 | C | T |
| MEN0092-P | ANKS1A  | snp | 6  | 34937855  | 34937855  | C | A |
| MEN0092-P | AP2M1   | snp | 3  | 183899704 | 183899704 | C | T |
| MEN0092-P | TMOD1   | snp | 9  | 100328233 | 100328233 | C | T |
| MEN0092-P | EXOC6   | snp | 10 | 94816757  | 94816757  | G | A |
| MEN0092-P | SCN9A   | snp | 2  | 167138287 | 167138287 | C | T |
| MEN0092-P | OR5B21  | snp | 11 | 58275329  | 58275329  | G | A |
| MEN0092-P | FGD1    | snp | X  | 54481902  | 54481902  | C | T |
| MEN0092-P | PAXBP1  | snp | 21 | 34123491  | 34123491  | G | A |
| MEN0092-P | OR4N5   | snp | 14 | 20612564  | 20612564  | C | T |
| MEN0092-P | TCHH    | snp | 1  | 152080468 | 152080468 | C | T |
| MEN0092-P | HERC1   | snp | 15 | 63933709  | 63933709  | C | T |
| MEN0092-P | RICTOR  | snp | 5  | 38950324  | 38950324  | G | A |
| MEN0092-P | KPNA2   | snp | 17 | 66040120  | 66040120  | G | A |
| MEN0092-P | OR51E1  | snp | 11 | 4674445   | 4674445   | G | A |
| MEN0092-P | GLYR1   | snp | 16 | 4861768   | 4861768   | C | T |
| MEN0092-P | AGAP3   | snp | 7  | 150817156 | 150817156 | G | A |
| MEN0092-P | VAR52   | snp | 6  | 30889969  | 30889969  | G | A |
| MEN0092-P | SLC6A16 | snp | 19 | 49812145  | 49812145  | C | T |
| MEN0092-P | KALRN   | snp | 3  | 124193577 | 124193577 | T | C |
| MEN0092-P | SLC16A7 | snp | 12 | 60168915  | 60168915  | A | G |
| MEN0092-P | FAT4    | snp | 4  | 126370710 | 126370710 | G | A |
| MEN0092-P | TUBGCP5 | snp | 15 | 22855271  | 22855271  | A | G |
| MEN0092-P | LNPEP   | snp | 5  | 96315595  | 96315595  | C | T |
| MEN0092-P | TMC1    | snp | 9  | 75406943  | 75406943  | G | A |
| MEN0092-P | SLIT2   | snp | 4  | 20533609  | 20533609  | G | A |
| MEN0092-P | PRADC1  | snp | 2  | 73456041  | 73456041  | G | A |
| MEN0092-P | ETFB    | snp | 19 | 51857433  | 51857433  | C | T |
| MEN0092-P | FGD2    | snp | 6  | 36982782  | 36982782  | C | T |
| MEN0092-P | AGFG2   | snp | 7  | 100159983 | 100159983 | G | A |
| MEN0092-P | SLC35B3 | snp | 6  | 8420990   | 8420990   | C | T |
| MEN0092-P | COPB2   | snp | 3  | 139078167 | 139078167 | G | A |
| MEN0092-P | RRP36   | snp | 6  | 42995168  | 42995168  | G | A |
| MEN0092-P | KAT2A   | snp | 17 | 40265767  | 40265767  | C | T |
| MEN0092-P | HS3ST4  | snp | 16 | 26147180  | 26147180  | T | A |
| MEN0092-P | PCDHA8  | snp | 5  | 140222585 | 140222585 | A | G |
| MEN0092-P | POLR3E  | snp | 16 | 22335966  | 22335966  | C | T |
| MEN0092-P | LIMK1   | snp | 7  | 73523341  | 73523341  | C | T |
| MEN0092-P | IL2RG   | snp | X  | 70330402  | 70330402  | G | A |
| MEN0092-P | FOPNL   | snp | 16 | 15967450  | 15967450  | G | A |
| MEN0092-P | ZNF1    | snp | 20 | 47879939  | 47879939  | G | A |
| MEN0092-P | GRIA3   | snp | X  | 122538739 | 122538739 | G | A |
| MEN0092-P | NOS1AP  | snp | 1  | 162336911 | 162336911 | C | T |

|           |            |     |            |           |           |   |   |
|-----------|------------|-----|------------|-----------|-----------|---|---|
| MEN0092-P | MACF1      | snp | 1          | 39900201  | 39900201  | A | G |
| MEN0092-P | WDR11      | snp | 10         | 122668104 | 122668104 | G | A |
| MEN0092-P | ZNF124     | snp | 1          | 247320487 | 247320487 | C | T |
| MEN0092-P | AC011841.1 | snp | 3L000205.1 | 117670    | 117670    | G | A |
| MEN0092-P | PAM        | snp | 5          | 102364747 | 102364747 | C | T |
| MEN0092-P | PTCH1      | snp | 9          | 98222052  | 98222052  | C | T |
| MEN0092-P | ZNF197     | snp | 3          | 44672663  | 44672663  | C | T |
| MEN0092-P | CHRFAM7A   | snp | 15         | 30665189  | 30665189  | T | C |
| MEN0092-P | CEA        | snp | 19         | 42213763  | 42213763  | C | T |
| MEN0092-P | ZC3H12B    | snp | X          | 64722658  | 64722658  | C | T |
| MEN0092-P | STXBP1     | snp | 9          | 130438979 | 130438979 | G | C |
| MEN0092-P | POM121     | snp | 7          | 72398987  | 72398987  | G | A |
| MEN0092-P | MAML3      | snp | 4          | 140640790 | 140640790 | G | A |
| MEN0092-P | CEP63      | snp | 3          | 134268018 | 134268018 | G | T |
| MEN0092-P | EPHB3      | snp | 3          | 184294803 | 184294803 | G | A |
| MEN0092-P | STAB1      | snp | 3          | 52548772  | 52548772  | C | T |
| MEN0092-P | RDX        | snp | 11         | 110102620 | 110102620 | G | A |
| MEN0092-P | RTP2       | snp | 3          | 187416659 | 187416659 | G | A |
| MEN0092-P | ERVW-1     | snp | 7          | 92099356  | 92099356  | T | C |
| MEN0092-P | CGN        | snp | 1          | 151497279 | 151497279 | C | T |
| MEN0092-P | DLGAP1     | snp | 18         | 3879539   | 3879539   | C | T |
| MEN0092-P | PSMB11     | snp | 14         | 23512003  | 23512003  | G | A |
| MEN0092-P | CNTROB     | snp | 17         | 7843487   | 7843487   | G | A |
| MEN0092-P | LMNA       | snp | 1          | 156106150 | 156106150 | C | T |
| MEN0092-P | ATP13A3    | snp | 3          | 194152573 | 194152573 | A | G |
| MEN0092-P | CKAP5      | snp | 11         | 46780906  | 46780906  | T | C |
| MEN0092-P | MRPS10     | snp | 6          | 42185554  | 42185554  | G | A |
| MEN0092-P | KCNH6      | snp | 17         | 61613276  | 61613276  | G | A |
| MEN0092-P | SMG8       | snp | 17         | 57290754  | 57290754  | G | A |
| MEN0092-P | ARHGFEF28  | snp | 5          | 73069856  | 73069856  | G | A |
| MEN0092-P | TCTN2      | snp | 12         | 124175110 | 124175110 | G | A |
| MEN0092-P | LRRIQ1     | snp | 12         | 85492270  | 85492270  | G | A |
| MEN0092-P | TRIM46     | snp | 1          | 155152396 | 155152396 | C | T |
| MEN0092-P | CD163L1    | snp | 12         | 7526002   | 7526002   | G | A |
| MEN0092-P | TBCEL      | snp | 11         | 120918273 | 120918273 | G | A |
| MEN0092-P | GPR124     | snp | 8          | 37690604  | 37690604  | G | A |
| MEN0092-P | EML1       | snp | 14         | 100377846 | 100377846 | C | T |
| MEN0092-P | IGLV1-47   | snp | 22         | 22712149  | 22712149  | G | A |
| MEN0092-P | ADAMTS6    | snp | 5          | 64587158  | 64587158  | C | A |
| MEN0092-P | ANKRD11    | snp | 16         | 89349513  | 89349513  | G | A |
| MEN0092-P | ZNF716     | snp | 7          | 57510026  | 57510026  | G | A |
| MEN0092-P | NID1       | snp | 1          | 236176855 | 236176855 | C | T |
| MEN0092-P | CEP164     | snp | 11         | 117265848 | 117265848 | G | A |
| MEN0092-P | HIVEP1     | snp | 6          | 12122908  | 12122908  | G | C |
| MEN0092-P | TTLL9      | snp | 20         | 30510805  | 30510805  | G | A |
| MEN0092-P | TNXB       | snp | 6          | 32010287  | 32010287  | C | T |
| MEN0092-P | ADAMTS2    | snp | 5          | 178555047 | 178555047 | C | T |

|           |          |     |    |           |           |   |   |
|-----------|----------|-----|----|-----------|-----------|---|---|
| MEN0092-P | BMP8B    | snp | 1  | 40229458  | 40229458  | C | T |
| MEN0092-P | CYP4F22  | snp | 19 | 15659011  | 15659011  | C | T |
| MEN0092-P | PROSER1  | snp | 13 | 39587833  | 39587833  | T | C |
| MEN0092-P | MEGF8    | snp | 19 | 42866331  | 42866331  | G | A |
| MEN0092-P | SLC32A1  | snp | 20 | 37356192  | 37356192  | G | A |
| MEN0092-P | SIRPD    | snp | 20 | 1532445   | 1532445   | G | A |
| MEN0092-P | MTSS1L   | snp | 16 | 70712220  | 70712220  | G | A |
| MEN0092-P | NEB      | snp | 2  | 152381087 | 152381087 | G | C |
| MEN0092-P | RYR3     | snp | 15 | 33905485  | 33905485  | C | T |
| MEN0092-P | POM121C  | snp | 7  | 75050828  | 75050828  | C | T |
| MEN0092-P | SMYD1    | snp | 2  | 88390585  | 88390585  | G | A |
| MEN0092-P | RGAG1    | snp | X  | 109697237 | 109697237 | C | T |
| MEN0092-P | PRC1     | snp | 15 | 91517428  | 91517428  | C | T |
| MEN0092-P | ZNF587   | snp | 19 | 58370321  | 58370321  | C | T |
| MEN0092-P | DYRK2    | snp | 12 | 68051937  | 68051937  | C | T |
| MEN0092-P | GLB1L3   | snp | 11 | 134182264 | 134182264 | G | A |
| MEN0092-P | SUSD1    | snp | 9  | 114904657 | 114904657 | T | C |
| MEN0092-P | AMBN     | snp | 4  | 71472298  | 71472298  | G | A |
| MEN0092-P | PAF1     | snp | 19 | 39880295  | 39880295  | G | A |
| MEN0092-P | L1CAM    | snp | X  | 153135330 | 153135330 | G | A |
| MEN0092-P | RMND5B   | snp | 5  | 177569902 | 177569902 | C | T |
| MEN0092-P | C1orf222 | snp | 1  | 1854450   | 1854450   | G | A |
| MEN0092-P | PCDHGA3  | snp | 5  | 140725053 | 140725053 | G | A |
| MEN0092-P | ARHGEF15 | snp | 17 | 8215674   | 8215674   | G | A |
| MEN0092-P | BRD4     | snp | 19 | 15349771  | 15349771  | G | A |
| MEN0092-P | ARNTL    | snp | 11 | 13375965  | 13375965  | G | A |
| MEN0092-P | MSTO1    | snp | 1  | 155717640 | 155717640 | C | T |
| MEN0092-P | LRRC37B  | snp | 17 | 30349744  | 30349744  | G | A |
| MEN0092-P | KIAA1683 | snp | 19 | 18376959  | 18376959  | G | C |
| MEN0092-P | ATP2A1   | snp | 16 | 28911947  | 28911947  | C | T |
| MEN0092-P | POLQ     | snp | 3  | 121208882 | 121208882 | T | C |
| MEN0092-P | ERN1     | snp | 17 | 62121527  | 62121527  | G | A |
| MEN0092-P | RYR3     | snp | 15 | 33926811  | 33926811  | C | T |
| MEN0092-P | RSPH6A   | snp | 19 | 46299168  | 46299168  | C | T |
| MEN0092-P | GBAS     | snp | 7  | 56065092  | 56065092  | G | A |
| MEN0092-P | EIF4G1   | snp | 3  | 184045188 | 184045188 | C | T |
| MEN0092-P | ZNF711   | snp | X  | 84510549  | 84510549  | G | A |
| MEN0092-P | DEAF1    | snp | 11 | 654033    | 654033    | C | T |
| MEN0092-P | SLC47A1  | snp | 17 | 19480670  | 19480670  | C | T |
| MEN0092-P | TTN      | snp | 2  | 179464170 | 179464170 | G | A |
| MEN0092-P | ARHGAP5  | snp | 14 | 32561286  | 32561286  | A | G |
| MEN0092-P | ZNF213   | snp | 16 | 3189049   | 3189049   | G | A |
| MEN0092-P | DHRS4L2  | snp | 14 | 24464325  | 24464325  | G | A |
| MEN0092-P | UBE3B    | snp | 12 | 109962297 | 109962297 | G | A |
| MEN0092-P | NFIC     | snp | 19 | 3382127   | 3382127   | C | T |
| MEN0092-P | ERVFRD-1 | snp | 6  | 11104921  | 11104921  | C | T |
| MEN0092-P | KRT83    | snp | 12 | 52714897  | 52714897  | C | T |

|            |              |     |    |           |           |   |   |
|------------|--------------|-----|----|-----------|-----------|---|---|
| MEN0092-P  | COLQ         | snp | 3  | 15529744  | 15529744  | G | A |
| MEN0092-P  | BCL9         | snp | 1  | 147095868 | 147095868 | T | C |
| MEN0092-P  | ARID4B       | snp | 1  | 235345598 | 235345598 | T | C |
| MEN0092-P  | CTC-432M15.3 | snp | 5  | 130840366 | 130840366 | G | A |
| MEN0092-P  | FCGBP        | snp | 19 | 40364333  | 40364333  | C | T |
| MEN0092-P  | CA14         | snp | 1  | 150233929 | 150233929 | A | G |
| MEN0092-P  | SIPA1L2      | snp | 1  | 232551324 | 232551324 | C | T |
| MEN0092-P  | PSEN2        | snp | 1  | 227071448 | 227071448 | C | T |
| MEN0092-P  | ZFHX4        | snp | 8  | 77616634  | 77616634  | G | A |
| MEN0092-P  | ITM2A        | snp | X  | 78618576  | 78618576  | G | A |
| MEN0092-P  | RBBP6        | snp | 16 | 24578601  | 24578601  | C | T |
| MEN0092-P  | CHRM4        | snp | 11 | 46407272  | 46407272  | G | A |
| MEN0092-P  | SATB1        | snp | 3  | 18462365  | 18462365  | C | T |
| MEN0092-P  | SLC17A2      | snp | 6  | 25913553  | 25913553  | G | A |
| MEN0092-P  | SON          | snp | 21 | 34931986  | 34931986  | G | A |
| MEN0092-P  | FLG          | snp | 1  | 152283466 | 152283466 | C | T |
| MEN0092-P  | SVEP1        | snp | 9  | 113173903 | 113173903 | C | T |
| MEN0092-P  | MDC1         | snp | 6  | 30680233  | 30680233  | C | T |
| MEN0092-P  | C9orf91      | snp | 9  | 117400932 | 117400932 | G | A |
| MEN0092-P  | ME3          | snp | 11 | 86209022  | 86209022  | C | A |
| MEN0092-P  | RTN2         | snp | 19 | 45998201  | 45998201  | C | T |
| MEN0092-P  | FLG          | snp | 1  | 152277116 | 152277116 | C | T |
| MEN0092-P  | EIF1AX       | snp | X  | 20148638  | 20148638  | T | C |
| MEN0092-P  | APBA1        | snp | 9  | 72131392  | 72131392  | C | A |
| MEN0092-P  | POTEC        | snp | 18 | 14513764  | 14513764  | C | T |
| MEN0092-P  | TCHH         | snp | 1  | 152084615 | 152084615 | G | A |
| MEN0093-PO | CHRDL2       | snp | 11 | 74421931  | 74421931  | G | A |
| MEN0093-PO | NBPF9        | snp | 1  | 144828707 | 144828707 | G | T |
| MEN0093-PO | NBPF10       | snp | 1  | 145296448 | 145296448 | T | A |
| MEN0093-PO | KLHL26       | snp | 19 | 18779922  | 18779922  | A | C |
| MEN0093-PO | KCNK9        | snp | 8  | 140630518 | 140630518 | G | A |
| MEN0093-PO | NBPF9        | snp | 1  | 144828554 | 144828554 | C | G |
| MEN0093-PO | TRBV6-7      | snp | 7  | 142143907 | 142143907 | T | C |
| MEN0093-PO | PARG         | snp | 10 | 51093329  | 51093329  | C | T |
| MEN0093-PO | INSR         | snp | 19 | 7142913   | 7142913   | C | T |
| MEN0093-PO | NBPF9        | snp | 1  | 144828624 | 144828624 | A | T |
| MEN0093-PO | KRT6B        | snp | 12 | 52845601  | 52845601  | C | T |
| MEN0093-PO | MUC6         | snp | 11 | 1017546   | 1017546   | T | C |
| MEN0093-PO | TRBV6-7      | snp | 7  | 142143839 | 142143839 | G | A |
| MEN0093-PO | ANKRD36C     | snp | 2  | 96521862  | 96521862  | T | A |
| MEN0093-PO | MAN2A1       | snp | 5  | 109178148 | 109178148 | C | G |
| MEN0093-PO | FRG1B        | snp | 20 | 29625875  | 29625875  | T | C |
| MEN0093-PO | ANAPC2       | snp | 9  | 140082133 | 140082133 | G | C |
| MEN0093-PO | ACTR3C       | snp | 7  | 149983565 | 149983565 | T | C |
| MEN0093-PO | RGPD3        | snp | 2  | 107049681 | 107049681 | T | C |
| MEN0093-PO | TRAPPC8      | snp | 18 | 29432467  | 29432467  | G | A |
| MEN0093-PO | TRIM48       | snp | 11 | 55032684  | 55032684  | T | C |

|            |             |     |            |           |           |   |   |
|------------|-------------|-----|------------|-----------|-----------|---|---|
| MEN0093-P0 | FRG1B       | snp | 20         | 29625892  | 29625892  | T | C |
| MEN0093-P0 | MBD6        | snp | 12         | 57922477  | 57922477  | G | C |
| MEN0093-P0 | FAT4        | snp | 4          | 126371885 | 126371885 | T | G |
| MEN0093-P0 | THBS1       | snp | 15         | 39883745  | 39883745  | A | G |
| MEN0093-P0 | ANKRD36     | snp | 2          | 97869931  | 97869931  | A | T |
| MEN0093-P0 | RFPL3       | snp | 22         | 32756703  | 32756703  | C | T |
| MEN0093-P0 | KRTAP4-7    | snp | 17         | 39240627  | 39240627  | T | C |
| MEN0093-P0 | PRMT10      | snp | 4          | 148560188 | 148560188 | G | A |
| MEN0093-P0 | FRG1B       | snp | 20         | 29623218  | 29623218  | A | G |
| MEN0093-P0 | ADAMTS6     | snp | 5          | 64569214  | 64569214  | G | A |
| MEN0093-P0 | IGHV4OR15-8 | snp | 15         | 22473167  | 22473167  | T | C |
| MEN0093-P0 | DFNA5       | snp | 7          | 24745946  | 24745946  | T | C |
| MEN0093-P0 | AL592183.1  | snp | 3L000219.1 | 83307     | 83307     | G | T |
| MEN0093-P0 | TMEM91      | snp | 19         | 41889651  | 41889651  | A | G |
| MEN0093-P0 | PRMT8       | snp | 12         | 3649787   | 3649787   | T | C |
| MEN0093-P0 | RAG1        | snp | 11         | 36595333  | 36595333  | G | A |
| MEN0093-P0 | NBPF10      | snp | 1          | 145368524 | 145368524 | A | T |
| MEN0093-P0 | ZAN         | snp | 7          | 100350474 | 100350474 | T | C |
| MEN0093-P0 | KRTAP5-4    | snp | 11         | 1642989   | 1642989   | C | A |
| MEN0093-P0 | ZAN         | snp | 7          | 100350126 | 100350126 | G | A |
| MEN0093-P0 | ARHGEF12    | snp | 11         | 120352011 | 120352011 | G | A |
| MEN0093-P0 | TFAP4       | snp | 16         | 4310225   | 4310225   | T | G |
| MEN0093-P0 | PCLO        | snp | 7          | 82784471  | 82784471  | A | G |
| MEN0093-P0 | MDK         | snp | 11         | 46404331  | 46404331  | C | G |
| MEN0093-P0 | NBPF9       | snp | 1          | 144828707 | 144828707 | G | T |
| MEN0093-P0 | INSR        | snp | 19         | 7142913   | 7142913   | C | T |
| MEN0093-P0 | PRMT10      | snp | 4          | 148560188 | 148560188 | G | A |
| MEN0093-P0 | TRBV6-7     | snp | 7          | 142143907 | 142143907 | T | C |
| MEN0093-P0 | KLHL26      | snp | 19         | 18779922  | 18779922  | A | C |
| MEN0093-P0 | CHRDL2      | snp | 11         | 74421931  | 74421931  | G | A |
| MEN0093-P0 | ACTR3C      | snp | 7          | 149983565 | 149983565 | T | C |
| MEN0093-P0 | ANAPC2      | snp | 9          | 140082133 | 140082133 | G | C |
| MEN0093-P0 | PARG        | snp | 10         | 51093329  | 51093329  | C | T |
| MEN0093-P0 | ADAMTS6     | snp | 5          | 64569214  | 64569214  | G | A |
| MEN0093-P0 | TMEM91      | snp | 19         | 41889651  | 41889651  | A | G |
| MEN0093-P0 | NBPF10      | snp | 1          | 145368524 | 145368524 | A | T |
| MEN0093-P0 | FAT4        | snp | 4          | 126371885 | 126371885 | T | G |
| MEN0093-P0 | MAN2A1      | snp | 5          | 109178148 | 109178148 | C | G |
| MEN0093-P0 | FRG1B       | snp | 20         | 29625875  | 29625875  | T | C |
| MEN0093-P0 | NBPF9       | snp | 1          | 144828554 | 144828554 | C | G |
| MEN0093-P0 | IGHV4OR15-8 | snp | 15         | 22473167  | 22473167  | T | C |
| MEN0093-P0 | RFPL3       | snp | 22         | 32756703  | 32756703  | C | T |
| MEN0093-P0 | MUC6        | snp | 11         | 1017546   | 1017546   | T | C |
| MEN0093-P0 | NBPF9       | snp | 1          | 144828624 | 144828624 | A | T |
| MEN0093-P0 | DFNA5       | snp | 7          | 24745946  | 24745946  | T | C |
| MEN0093-P0 | TRIM48      | snp | 11         | 55032684  | 55032684  | T | C |
| MEN0093-P0 | ARHGEF12    | snp | 11         | 120352011 | 120352011 | G | A |



|            |            |     |            |           |           |   |   |
|------------|------------|-----|------------|-----------|-----------|---|---|
| MEN0093-P0 | NBPF10     | snp | 1          | 145296448 | 145296448 | T | A |
| MEN0093-P0 | AL592183.1 | snp | 3L000219.1 | 83307     | 83307     | G | T |
| MEN0093-P0 | RAG1       | snp | 11         | 36595333  | 36595333  | G | A |
| MEN0093-P0 | RGPD3      | snp | 2          | 107049681 | 107049681 | T | C |
| MEN0093-P0 | FRG1B      | snp | 20         | 29623218  | 29623218  | A | G |
| MEN0093-P0 | ANKRD36C   | snp | 2          | 96521862  | 96521862  | T | A |
| MEN0093-P0 | MDK        | snp | 11         | 46404331  | 46404331  | C | G |
| MEN0093-P0 | PRMT8      | snp | 12         | 3649787   | 3649787   | T | C |
| MEN0093-P0 | TRBV6-7    | snp | 7          | 142143839 | 142143839 | G | A |
| MEN0093-P0 | FRG1B      | snp | 20         | 29625892  | 29625892  | T | C |
| MEN0093-P0 | TFAP4      | snp | 16         | 4310225   | 4310225   | T | G |
| MEN0093-P0 | TRAPPC8    | snp | 18         | 29432467  | 29432467  | G | A |
| MEN0093-P0 | KRT6B      | snp | 12         | 52845601  | 52845601  | C | T |
| MEN0093-P0 | ANKRD36    | snp | 2          | 97869931  | 97869931  | A | T |
| MEN0093-P0 | KCNK9      | snp | 8          | 140630518 | 140630518 | G | A |
| MEN0093-P0 | ZAN        | snp | 7          | 100350126 | 100350126 | G | A |
| MEN0093-P0 | THBS1      | snp | 15         | 39883745  | 39883745  | A | G |
| MEN0093-P0 | MBD6       | snp | 12         | 57922477  | 57922477  | G | C |
| MEN0093-P0 | KRTAP5-4   | snp | 11         | 1642989   | 1642989   | C | A |
| MEN0093-P0 | KRTAP4-7   | snp | 17         | 39240627  | 39240627  | T | C |
| MEN0093-P0 | ZAN        | snp | 7          | 100350474 | 100350474 | T | C |
| MEN0093-P0 | PCLO       | snp | 7          | 82784471  | 82784471  | A | G |
| MEN0093-P1 | CHRDL2     | snp | 11         | 74421931  | 74421931  | G | A |
| MEN0093-P1 | FRG1B      | snp | 20         | 29625941  | 29625941  | A | T |
| MEN0093-P1 | NBPF9      | snp | 1          | 144828707 | 144828707 | G | T |
| MEN0093-P1 | FANCD2     | snp | 3          | 10136015  | 10136015  | C | T |
| MEN0093-P1 | OR10A4     | snp | 11         | 6898510   | 6898510   | C | A |
| MEN0093-P1 | NBPF10     | snp | 1          | 145296448 | 145296448 | T | A |
| MEN0093-P1 | BEST3      | snp | 12         | 70049492  | 70049492  | G | A |
| MEN0093-P1 | KLHL26     | snp | 19         | 18779922  | 18779922  | A | C |
| MEN0093-P1 | TRBV6-7    | snp | 7          | 142143907 | 142143907 | T | C |
| MEN0093-P1 | AHNAK2     | snp | 14         | 105414838 | 105414838 | T | C |
| MEN0093-P1 | KCNA5      | snp | 12         | 5154148   | 5154148   | C | T |
| MEN0093-P1 | NBPF9      | snp | 1          | 144828624 | 144828624 | A | T |
| MEN0093-P1 | ANKRD36C   | snp | 2          | 96521777  | 96521777  | T | C |
| MEN0093-P1 | MUC6       | snp | 11         | 1017546   | 1017546   | T | C |
| MEN0093-P1 | XPOT       | snp | 12         | 64815015  | 64815015  | G | A |
| MEN0093-P1 | HRH1       | snp | 3          | 11301963  | 11301963  | G | A |
| MEN0093-P1 | ANKRD36C   | snp | 2          | 96521862  | 96521862  | T | A |
| MEN0093-P1 | ANKRD36C   | snp | 2          | 96521834  | 96521834  | T | C |
| MEN0093-P1 | FRG1B      | snp | 20         | 29625875  | 29625875  | T | C |
| MEN0093-P1 | ISY1       | snp | 3          | 128878018 | 128878018 | G | A |
| MEN0093-P1 | POM121     | snp | 7          | 72398976  | 72398976  | A | G |
| MEN0093-P1 | ANAPC2     | snp | 9          | 140082133 | 140082133 | G | C |
| MEN0093-P1 | SPAG8      | snp | 9          | 35811816  | 35811816  | G | A |
| MEN0093-P1 | FRG1B      | snp | 20         | 29625885  | 29625885  | A | T |
| MEN0093-P1 | RGPD3      | snp | 2          | 107049681 | 107049681 | T | C |

|            |             |     |    |           |           |   |   |
|------------|-------------|-----|----|-----------|-----------|---|---|
| MEN0093-P1 | FAT4        | snp | 4  | 126371885 | 126371885 | T | G |
| MEN0093-P1 | STXBP5      | snp | 6  | 147704087 | 147704087 | G | C |
| MEN0093-P1 | FARP1       | snp | 13 | 98896867  | 98896867  | T | G |
| MEN0093-P1 | POTEC       | snp | 18 | 14543063  | 14543063  | A | C |
| MEN0093-P1 | ANKRD36     | snp | 2  | 97869931  | 97869931  | A | T |
| MEN0093-P1 | RFPL3       | snp | 22 | 32756703  | 32756703  | C | T |
| MEN0093-P1 | KRTAP4-7    | snp | 17 | 39240627  | 39240627  | T | C |
| MEN0093-P1 | NPIPB6      | snp | 16 | 28354353  | 28354353  | T | G |
| MEN0093-P1 | FRG1B       | snp | 20 | 29623218  | 29623218  | A | G |
| MEN0093-P1 | PIK3CB      | snp | 3  | 138478172 | 138478172 | A | G |
| MEN0093-P1 | IGHV4OR15-8 | snp | 15 | 22473167  | 22473167  | T | C |
| MEN0093-P1 | MUC5B       | snp | 11 | 1264394   | 1264394   | T | C |
| MEN0093-P1 | PRMT8       | snp | 12 | 3649787   | 3649787   | T | C |
| MEN0093-P1 | RAG1        | snp | 11 | 36595333  | 36595333  | G | A |
| MEN0093-P1 | ANKRD36C    | snp | 2  | 96593025  | 96593025  | C | T |
| MEN0093-P1 | KRTAP5-4    | snp | 11 | 1642989   | 1642989   | C | A |
| MEN0093-P1 | ZAN         | snp | 7  | 100349865 | 100349865 | T | C |
| MEN0093-P1 | MUC21       | snp | 6  | 30954806  | 30954806  | T | C |
| MEN0093-P1 | MUC21       | snp | 6  | 30955025  | 30955025  | G | A |
| MEN0093-P1 | NBPF9       | snp | 1  | 144825519 | 144825519 | T | G |
| MEN0093-P1 | ARHGEF12    | snp | 11 | 120352011 | 120352011 | G | A |
| MEN0093-P1 | OR10A4      | snp | 11 | 6898510   | 6898510   | C | A |
| MEN0093-P1 | NBPF9       | snp | 1  | 144828707 | 144828707 | G | T |
| MEN0093-P1 | SPAG8       | snp | 9  | 35811816  | 35811816  | G | A |
| MEN0093-P1 | BEST3       | snp | 12 | 70049492  | 70049492  | G | A |
| MEN0093-P1 | TRBV6-7     | snp | 7  | 142143907 | 142143907 | T | C |
| MEN0093-P1 | KLHL26      | snp | 19 | 18779922  | 18779922  | A | C |
| MEN0093-P1 | CHRD2       | snp | 11 | 74421931  | 74421931  | G | A |
| MEN0093-P1 | HRH1        | snp | 3  | 11301963  | 11301963  | G | A |
| MEN0093-P1 | ANAPC2      | snp | 9  | 140082133 | 140082133 | G | C |
| MEN0093-P1 | MUC5B       | snp | 11 | 1264394   | 1264394   | T | C |
| MEN0093-P1 | POM121      | snp | 7  | 72398976  | 72398976  | A | G |
| MEN0093-P1 | XPOT        | snp | 12 | 64815015  | 64815015  | G | A |
| MEN0093-P1 | ISY1        | snp | 3  | 128878018 | 128878018 | G | A |
| MEN0093-P1 | AHNAK2      | snp | 14 | 105414838 | 105414838 | T | C |
| MEN0093-P1 | FRG1B       | snp | 20 | 29625875  | 29625875  | T | C |
| MEN0093-P1 | FARP1       | snp | 13 | 98896867  | 98896867  | T | G |
| MEN0093-P1 | PIK3CB      | snp | 3  | 138478172 | 138478172 | A | G |
| MEN0093-P1 | FANCD2      | snp | 3  | 10136015  | 10136015  | C | T |
| MEN0093-P1 | FAT4        | snp | 4  | 126371885 | 126371885 | T | G |
| MEN0093-P1 | STXBP5      | snp | 6  | 147704087 | 147704087 | G | C |
| MEN0093-P1 | IGHV4OR15-8 | snp | 15 | 22473167  | 22473167  | T | C |
| MEN0093-P1 | RFPL3       | snp | 22 | 32756703  | 32756703  | C | T |
| MEN0093-P1 | MUC6        | snp | 11 | 1017546   | 1017546   | T | C |
| MEN0093-P1 | NBPF9       | snp | 1  | 144828624 | 144828624 | A | T |
| MEN0093-P1 | MUC21       | snp | 6  | 30954806  | 30954806  | T | C |
| MEN0093-P1 | FRG1B       | snp | 20 | 29625941  | 29625941  | A | T |

|            |          |     |    |           |           |   |   |
|------------|----------|-----|----|-----------|-----------|---|---|
| MEN0093-P1 | ARHGEF12 | snp | 11 | 120352011 | 120352011 | G | A |
| MEN0093-P1 | NBPF10   | snp | 1  | 145296448 | 145296448 | T | A |
| MEN0093-P1 | ANKRD36C | snp | 2  | 96593025  | 96593025  | C | T |
| MEN0093-P1 | RAG1     | snp | 11 | 36595333  | 36595333  | G | A |
| MEN0093-P1 | NBPF9    | snp | 1  | 144825519 | 144825519 | T | G |
| MEN0093-P1 | RGPD3    | snp | 2  | 107049681 | 107049681 | T | C |
| MEN0093-P1 | FRG1B    | snp | 20 | 29623218  | 29623218  | A | G |
| MEN0093-P1 | ANKRD36C | snp | 2  | 96521834  | 96521834  | T | C |
| MEN0093-P1 | MUC21    | snp | 6  | 30955025  | 30955025  | G | A |
| MEN0093-P1 | ANKRD36C | snp | 2  | 96521777  | 96521777  | T | C |
| MEN0093-P1 | ANKRD36C | snp | 2  | 96521862  | 96521862  | T | A |
| MEN0093-P1 | PRMT8    | snp | 12 | 3649787   | 3649787   | T | C |
| MEN0093-P1 | POTEC    | snp | 18 | 14543063  | 14543063  | A | C |
| MEN0093-P1 | KCNA5    | snp | 12 | 5154148   | 5154148   | C | T |
| MEN0093-P1 | ANKRD36  | snp | 2  | 97869931  | 97869931  | A | T |
| MEN0093-P1 | ZAN      | snp | 7  | 100349865 | 100349865 | T | C |
| MEN0093-P1 | NPIPB6   | snp | 16 | 28354353  | 28354353  | T | G |
| MEN0093-P1 | KRTAP5-4 | snp | 11 | 1642989   | 1642989   | C | A |
| MEN0093-P1 | KRTAP4-7 | snp | 17 | 39240627  | 39240627  | T | C |
| MEN0093-P4 | ZNF214   | snp | 11 | 7022096   | 7022096   | T | A |
| MEN0093-P4 | CHRDL2   | snp | 11 | 74421931  | 74421931  | G | A |
| MEN0093-P4 | HYDIN    | snp | 16 | 71163638  | 71163638  | G | T |
| MEN0093-P4 | ALAS1    | snp | 3  | 52245436  | 52245436  | C | T |
| MEN0093-P4 | FRG1B    | snp | 20 | 29625941  | 29625941  | A | T |
| MEN0093-P4 | NBPF9    | snp | 1  | 144828707 | 144828707 | G | T |
| MEN0093-P4 | RBM39    | snp | 20 | 34309742  | 34309742  | G | A |
| MEN0093-P4 | HK3      | snp | 5  | 176314566 | 176314566 | G | C |
| MEN0093-P4 | NEU1     | snp | 6  | 31827548  | 31827548  | T | C |
| MEN0093-P4 | NBPF10   | snp | 1  | 145296448 | 145296448 | T | A |
| MEN0093-P4 | SLC6A16  | snp | 19 | 49793546  | 49793546  | C | T |
| MEN0093-P4 | GPR125   | snp | 4  | 22389626  | 22389626  | G | C |
| MEN0093-P4 | KLHL26   | snp | 19 | 18779922  | 18779922  | A | C |
| MEN0093-P4 | BRMS1    | snp | 11 | 66105270  | 66105270  | T | G |
| MEN0093-P4 | DBF4     | snp | 7  | 87516713  | 87516713  | G | T |
| MEN0093-P4 | PPAP2A   | snp | 5  | 54721815  | 54721815  | G | A |
| MEN0093-P4 | PGM2     | snp | 4  | 37839156  | 37839156  | C | T |
| MEN0093-P4 | KCNA5    | snp | 12 | 5154148   | 5154148   | C | T |
| MEN0093-P4 | NBPF9    | snp | 1  | 144828624 | 144828624 | A | T |
| MEN0093-P4 | MUC6     | snp | 11 | 1017546   | 1017546   | T | C |
| MEN0093-P4 | MANEA    | snp | 6  | 96054057  | 96054057  | G | A |
| MEN0093-P4 | FRG1B    | snp | 20 | 29625875  | 29625875  | T | C |
| MEN0093-P4 | RAB3GAP2 | snp | 1  | 220330670 | 220330670 | T | A |
| MEN0093-P4 | ANAPC2   | snp | 9  | 140082133 | 140082133 | G | C |
| MEN0093-P4 | PCDHB7   | snp | 5  | 140553891 | 140553891 | C | G |
| MEN0093-P4 | STS      | snp | X  | 7268006   | 7268006   | G | A |
| MEN0093-P4 | DEFB113  | snp | 6  | 49936566  | 49936566  | T | C |
| MEN0093-P4 | IPO4     | snp | 14 | 24653085  | 24653085  | C | T |

|            |             |     |            |           |           |   |   |
|------------|-------------|-----|------------|-----------|-----------|---|---|
| MEN0093-P4 | RGPD3       | snp | 2          | 107049681 | 107049681 | T | C |
| MEN0093-P4 | FRG1B       | snp | 20         | 29625892  | 29625892  | T | C |
| MEN0093-P4 | TTN         | snp | 2          | 179582052 | 179582052 | C | T |
| MEN0093-P4 | NRF1        | snp | 7          | 129350395 | 129350395 | C | A |
| MEN0093-P4 | FAT4        | snp | 4          | 126371885 | 126371885 | T | G |
| MEN0093-P4 | S100Z       | snp | 5          | 76171202  | 76171202  | G | T |
| MEN0093-P4 | ZC3H13      | snp | 13         | 46544548  | 46544548  | G | A |
| MEN0093-P4 | ANKRD36     | snp | 2          | 97869931  | 97869931  | A | T |
| MEN0093-P4 | RFPL3       | snp | 22         | 32756703  | 32756703  | C | T |
| MEN0093-P4 | KIAA2013    | snp | 1          | 11985396  | 11985396  | A | G |
| MEN0093-P4 | KRTAP4-7    | snp | 17         | 39240627  | 39240627  | T | C |
| MEN0093-P4 | RELA        | snp | 11         | 65423158  | 65423158  | C | T |
| MEN0093-P4 | ECM1        | snp | 1          | 150483520 | 150483520 | G | A |
| MEN0093-P4 | ZNF90       | snp | 19         | 20229970  | 20229970  | C | A |
| MEN0093-P4 | KRT37       | snp | 17         | 39578646  | 39578646  | C | T |
| MEN0093-P4 | FRG1B       | snp | 20         | 29623218  | 29623218  | A | G |
| MEN0093-P4 | GIF         | snp | 11         | 59603378  | 59603378  | C | T |
| MEN0093-P4 | IGHV4OR15-8 | snp | 15         | 22473167  | 22473167  | T | C |
| MEN0093-P4 | IL10RB      | snp | 21         | 34652075  | 34652075  | G | C |
| MEN0093-P4 | SLX4        | snp | 16         | 3633345   | 3633345   | G | C |
| MEN0093-P4 | AL592183.1  | snp | 3L000219.1 | 83307     | 83307     | G | T |
| MEN0093-P4 | PRMT8       | snp | 12         | 3649787   | 3649787   | T | C |
| MEN0093-P4 | RAG1        | snp | 11         | 36595333  | 36595333  | G | A |
| MEN0093-P4 | EGFL6       | snp | X          | 13626473  | 13626473  | C | T |
| MEN0093-P4 | NOBOX       | snp | 7          | 144098459 | 144098459 | C | T |
| MEN0093-P4 | KRTAP5-4    | snp | 11         | 1642989   | 1642989   | C | A |
| MEN0093-P4 | ESAM        | snp | 11         | 124628279 | 124628279 | A | G |
| MEN0093-P4 | SPACA7      | snp | 13         | 113088857 | 113088857 | T | G |
| MEN0093-P4 | FAM183B     | snp | 7          | 38725208  | 38725208  | C | T |
| MEN0093-P4 | SMNDC1      | snp | 10         | 112058542 | 112058542 | T | G |
| MEN0093-P4 | ARHGEF12    | snp | 11         | 120352011 | 120352011 | G | A |
| MEN0093-P4 | HOXD8       | snp | 2          | 176995618 | 176995618 | A | C |
| MEN0093-P4 | HNRNPC      | snp | 14         | 21679596  | 21679596  | T | C |
| MEN0093-P4 | RGPD8       | snp | 2          | 113127775 | 113127775 | G | C |
| MEN0093-P4 | PGM2        | snp | 4          | 37839156  | 37839156  | C | T |
| MEN0093-P4 | SLC6A16     | snp | 19         | 49793546  | 49793546  | C | T |
| MEN0093-P4 | NBPF9       | snp | 1          | 144828707 | 144828707 | G | T |
| MEN0093-P4 | GIF         | snp | 11         | 59603378  | 59603378  | C | T |
| MEN0093-P4 | MANEA       | snp | 6          | 96054057  | 96054057  | G | A |
| MEN0093-P4 | BRMS1       | snp | 11         | 66105270  | 66105270  | T | G |
| MEN0093-P4 | ZNF90       | snp | 19         | 20229970  | 20229970  | C | A |
| MEN0093-P4 | HK3         | snp | 5          | 176314566 | 176314566 | G | C |
| MEN0093-P4 | IPO4        | snp | 14         | 24653085  | 24653085  | C | T |
| MEN0093-P4 | KLHL26      | snp | 19         | 18779922  | 18779922  | A | C |
| MEN0093-P4 | NEU1        | snp | 6          | 31827548  | 31827548  | T | C |
| MEN0093-P4 | CHRD12      | snp | 11         | 74421931  | 74421931  | G | A |
| MEN0093-P4 | RAB3GAP2    | snp | 1          | 220330670 | 220330670 | T | A |

|            |             |     |            |           |           |   |   |
|------------|-------------|-----|------------|-----------|-----------|---|---|
| MEN0093-P4 | DBF4        | snp | 7          | 87516713  | 87516713  | G | T |
| MEN0093-P4 | RBM39       | snp | 20         | 34309742  | 34309742  | G | A |
| MEN0093-P4 | ALAS1       | snp | 3          | 52245436  | 52245436  | C | T |
| MEN0093-P4 | ANAPC2      | snp | 9          | 140082133 | 140082133 | G | C |
| MEN0093-P4 | PCDHB7      | snp | 5          | 140553891 | 140553891 | C | G |
| MEN0093-P4 | S100Z       | snp | 5          | 76171202  | 76171202  | G | T |
| MEN0093-P4 | HYDIN       | snp | 16         | 71163638  | 71163638  | G | T |
| MEN0093-P4 | PPAP2A      | snp | 5          | 54721815  | 54721815  | G | A |
| MEN0093-P4 | SLX4        | snp | 16         | 3633345   | 3633345   | G | C |
| MEN0093-P4 | FAT4        | snp | 4          | 126371885 | 126371885 | T | G |
| MEN0093-P4 | NRF1        | snp | 7          | 129350395 | 129350395 | C | A |
| MEN0093-P4 | KIAA2013    | snp | 1          | 11985396  | 11985396  | A | G |
| MEN0093-P4 | RGPD8       | snp | 2          | 113127775 | 113127775 | G | C |
| MEN0093-P4 | FRG1B       | snp | 20         | 29625875  | 29625875  | T | C |
| MEN0093-P4 | KRT37       | snp | 17         | 39578646  | 39578646  | C | T |
| MEN0093-P4 | IL10RB      | snp | 21         | 34652075  | 34652075  | G | C |
| MEN0093-P4 | IGHV4OR15-8 | snp | 15         | 22473167  | 22473167  | T | C |
| MEN0093-P4 | RFPL3       | snp | 22         | 32756703  | 32756703  | C | T |
| MEN0093-P4 | TTN         | snp | 2          | 179582052 | 179582052 | C | T |
| MEN0093-P4 | MUC6        | snp | 11         | 1017546   | 1017546   | T | C |
| MEN0093-P4 | NBPF9       | snp | 1          | 144828624 | 144828624 | A | T |
| MEN0093-P4 | FAM183B     | snp | 7          | 38725208  | 38725208  | C | T |
| MEN0093-P4 | DEFB113     | snp | 6          | 49936566  | 49936566  | T | C |
| MEN0093-P4 | FRG1B       | snp | 20         | 29625941  | 29625941  | A | T |
| MEN0093-P4 | ARHGEF12    | snp | 11         | 120352011 | 120352011 | G | A |
| MEN0093-P4 | NBPF10      | snp | 1          | 145296448 | 145296448 | T | A |
| MEN0093-P4 | AL592183.1  | snp | 5L000219.1 | 83307     | 83307     | G | T |
| MEN0093-P4 | STS         | snp | X          | 7268006   | 7268006   | G | A |
| MEN0093-P4 | RAG1        | snp | 11         | 36595333  | 36595333  | G | A |
| MEN0093-P4 | NOBOX       | snp | 7          | 144098459 | 144098459 | C | T |
| MEN0093-P4 | RGPD3       | snp | 2          | 107049681 | 107049681 | T | C |
| MEN0093-P4 | FRG1B       | snp | 20         | 29623218  | 29623218  | A | G |
| MEN0093-P4 | GPR125      | snp | 4          | 22389626  | 22389626  | G | C |
| MEN0093-P4 | RELA        | snp | 11         | 65423158  | 65423158  | C | T |
| MEN0093-P4 | ZNF214      | snp | 11         | 7022096   | 7022096   | T | A |
| MEN0093-P4 | ESAM        | snp | 11         | 124628279 | 124628279 | A | G |
| MEN0093-P4 | EGFL6       | snp | X          | 13626473  | 13626473  | C | T |
| MEN0093-P4 | PRMT8       | snp | 12         | 3649787   | 3649787   | T | C |
| MEN0093-P4 | ECM1        | snp | 1          | 150483520 | 150483520 | G | A |
| MEN0093-P4 | SMNDC1      | snp | 10         | 112058542 | 112058542 | T | G |
| MEN0093-P4 | FRG1B       | snp | 20         | 29625892  | 29625892  | T | C |
| MEN0093-P4 | HOXD8       | snp | 2          | 176995618 | 176995618 | A | C |
| MEN0093-P4 | KCNA5       | snp | 12         | 5154148   | 5154148   | C | T |
| MEN0093-P4 | ANKRD36     | snp | 2          | 97869931  | 97869931  | A | T |
| MEN0093-P4 | SPACA7      | snp | 13         | 113088857 | 113088857 | T | G |
| MEN0093-P4 | KRTAP5-4    | snp | 11         | 1642989   | 1642989   | C | A |
| MEN0093-P4 | HNRNPC      | snp | 14         | 21679596  | 21679596  | T | C |

|             |            |     |    |           |           |   |   |
|-------------|------------|-----|----|-----------|-----------|---|---|
| MEN0093-P4  | KRTAP4-7   | snp | 17 | 39240627  | 39240627  | T | C |
| MEN0093-P4  | ZC3H13     | snp | 13 | 46544548  | 46544548  | G | A |
| MEN0093G-P2 | CHRDL2     | snp | 11 | 74421931  | 74421931  | G | A |
| MEN0093G-P2 | NLRP9      | snp | 19 | 56244023  | 56244023  | G | T |
| MEN0093G-P2 | TCHH       | snp | 1  | 152082484 | 152082484 | G | T |
| MEN0093G-P2 | KLHL26     | snp | 19 | 18779922  | 18779922  | A | C |
| MEN0093G-P2 | BAZ2A      | snp | 12 | 56994060  | 56994060  | G | A |
| MEN0093G-P2 | ZNF417     | snp | 19 | 58420058  | 58420058  | C | A |
| MEN0093G-P2 | KCNA5      | snp | 12 | 5154148   | 5154148   | C | T |
| MEN0093G-P2 | KAT6A      | snp | 8  | 41832313  | 41832313  | T | C |
| MEN0093G-P2 | MUC6       | snp | 11 | 1017546   | 1017546   | T | C |
| MEN0093G-P2 | POLR2J3    | snp | 7  | 102207089 | 102207089 | T | C |
| MEN0093G-P2 | ANAPC2     | snp | 9  | 140082133 | 140082133 | G | C |
| MEN0093G-P2 | MUC17      | snp | 7  | 100676784 | 100676784 | A | G |
| MEN0093G-P2 | AC024580.1 | snp | 19 | 56662733  | 56662733  | G | A |
| MEN0093G-P2 | OR4M1      | snp | 14 | 20249164  | 20249164  | A | T |
| MEN0093G-P2 | SPAG8      | snp | 9  | 35811816  | 35811816  | G | A |
| MEN0093G-P2 | EZH1       | snp | 17 | 40876331  | 40876331  | T | G |
| MEN0093G-P2 | TNRC6A     | snp | 16 | 24815575  | 24815575  | G | C |
| MEN0093G-P2 | MUC4       | snp | 3  | 195508940 | 195508940 | C | G |
| MEN0093G-P2 | FAT4       | snp | 4  | 126371885 | 126371885 | T | G |
| MEN0093G-P2 | AC024580.1 | snp | 19 | 56662712  | 56662712  | G | A |
| MEN0093G-P2 | ZAN        | snp | 7  | 100349947 | 100349947 | C | T |
| MEN0093G-P2 | UBALD1     | snp | 16 | 4659758   | 4659758   | T | G |
| MEN0093G-P2 | FAM186A    | snp | 12 | 50746270  | 50746270  | C | G |
| MEN0093G-P2 | LRR37B     | snp | 17 | 30372764  | 30372764  | T | A |
| MEN0093G-P2 | ZAN        | snp | 7  | 100350036 | 100350036 | C | A |
| MEN0093G-P2 | TRIOBP     | snp | 22 | 38120503  | 38120503  | G | A |
| MEN0093G-P2 | FAM186A    | snp | 12 | 50746092  | 50746092  | A | G |
| MEN0093G-P2 | IVL        | snp | 1  | 152883164 | 152883164 | T | G |
| MEN0093G-P2 | FAM186A    | snp | 12 | 50746699  | 50746699  | T | G |
| MEN0093G-P2 | MUC17      | snp | 7  | 100680117 | 100680117 | T | C |
| MEN0093G-P2 | RAG1       | snp | 11 | 36595333  | 36595333  | G | A |
| MEN0093G-P2 | DNAJC9     | snp | 10 | 75006934  | 75006934  | T | C |
| MEN0093G-P2 | FRG1B      | snp | 20 | 29631566  | 29631566  | A | C |
| MEN0093G-P2 | ITSN1      | snp | 21 | 35258689  | 35258689  | C | G |
| MEN0093G-P2 | MUC4       | snp | 3  | 195514297 | 195514297 | A | G |
| MEN0093G-P2 | MUC4       | snp | 3  | 195508630 | 195508630 | T | G |
| MEN0093G-P2 | MUC17      | snp | 7  | 100679214 | 100679214 | T | C |
| MEN0093G-P2 | ARHGEF12   | snp | 11 | 120352011 | 120352011 | G | A |
| MEN0093G-P2 | MUC2       | snp | 11 | 1093232   | 1093232   | T | G |
| MEN0093G-P2 | ZAN        | snp | 7  | 100350520 | 100350520 | C | T |
| MEN0093G-P2 | RP1L1      | snp | 8  | 10466031  | 10466031  | A | C |
| MEN0093G-P2 | ZAN        | snp | 7  | 100350010 | 100350010 | C | T |
| MEN0093G-P2 | SPAG8      | snp | 9  | 35811816  | 35811816  | G | A |
| MEN0093G-P2 | NLRP9      | snp | 19 | 56244023  | 56244023  | G | T |
| MEN0093G-P2 | KLHL26     | snp | 19 | 18779922  | 18779922  | A | C |

|             |            |     |    |           |           |   |   |
|-------------|------------|-----|----|-----------|-----------|---|---|
| MEN0093G-P2 | CHRD12     | snp | 11 | 74421931  | 74421931  | G | A |
| MEN0093G-P2 | MUC17      | snp | 7  | 100676784 | 100676784 | A | G |
| MEN0093G-P2 | OR4M1      | snp | 14 | 20249164  | 20249164  | A | T |
| MEN0093G-P2 | ANAPC2     | snp | 9  | 140082133 | 140082133 | G | C |
| MEN0093G-P2 | AC024580.1 | snp | 19 | 56662712  | 56662712  | G | A |
| MEN0093G-P2 | EZH1       | snp | 17 | 40876331  | 40876331  | T | G |
| MEN0093G-P2 | ZNF417     | snp | 19 | 58420058  | 58420058  | C | A |
| MEN0093G-P2 | FAT4       | snp | 4  | 126371885 | 126371885 | T | G |
| MEN0093G-P2 | MUC4       | snp | 3  | 195508940 | 195508940 | C | G |
| MEN0093G-P2 | FAM186A    | snp | 12 | 50746092  | 50746092  | A | G |
| MEN0093G-P2 | MUC17      | snp | 7  | 100680117 | 100680117 | T | C |
| MEN0093G-P2 | MUC17      | snp | 7  | 100679214 | 100679214 | T | C |
| MEN0093G-P2 | BAZ2A      | snp | 12 | 56994060  | 56994060  | G | A |
| MEN0093G-P2 | MUC6       | snp | 11 | 1017546   | 1017546   | T | C |
| MEN0093G-P2 | FAM186A    | snp | 12 | 50746699  | 50746699  | T | G |
| MEN0093G-P2 | ARHGEF12   | snp | 11 | 120352011 | 120352011 | G | A |
| MEN0093G-P2 | FAM186A    | snp | 12 | 50746270  | 50746270  | C | G |
| MEN0093G-P2 | RAG1       | snp | 11 | 36595333  | 36595333  | G | A |
| MEN0093G-P2 | RP1L1      | snp | 8  | 10466031  | 10466031  | A | C |
| MEN0093G-P2 | POLR2J3    | snp | 7  | 102207089 | 102207089 | T | C |
| MEN0093G-P2 | LRRC37B    | snp | 17 | 30372764  | 30372764  | T | A |
| MEN0093G-P2 | ZAN        | snp | 7  | 100350520 | 100350520 | C | T |
| MEN0093G-P2 | DNAJC9     | snp | 10 | 75006934  | 75006934  | T | C |
| MEN0093G-P2 | MUC4       | snp | 3  | 195508630 | 195508630 | T | G |
| MEN0093G-P2 | ZAN        | snp | 7  | 100350010 | 100350010 | C | T |
| MEN0093G-P2 | KCNA5      | snp | 12 | 5154148   | 5154148   | C | T |
| MEN0093G-P2 | ITSN1      | snp | 21 | 35258689  | 35258689  | C | G |
| MEN0093G-P2 | KAT6A      | snp | 8  | 41832313  | 41832313  | T | C |
| MEN0093G-P2 | MUC4       | snp | 3  | 195514297 | 195514297 | A | G |
| MEN0093G-P2 | TNRC6A     | snp | 16 | 24815575  | 24815575  | G | C |
| MEN0093G-P2 | MUC2       | snp | 11 | 1093232   | 1093232   | T | G |
| MEN0093G-P2 | FRG1B      | snp | 20 | 29631566  | 29631566  | A | C |
| MEN0093G-P2 | ZAN        | snp | 7  | 100349947 | 100349947 | C | T |
| MEN0093G-P2 | UBALD1     | snp | 16 | 4659758   | 4659758   | T | G |
| MEN0093G-P2 | ZAN        | snp | 7  | 100350036 | 100350036 | C | A |
| MEN0093G-P2 | IVL        | snp | 1  | 152883164 | 152883164 | T | G |
| MEN0093G-P2 | TCHH       | snp | 1  | 152082484 | 152082484 | G | T |
| MEN0093G-P2 | TRIOBP     | snp | 22 | 38120503  | 38120503  | G | A |
| MEN0093G-P2 | AC024580.1 | snp | 19 | 56662733  | 56662733  | G | A |
| MEN0095-P   | SLC25A31   | snp | 4  | 128685483 | 128685483 | C | T |
| MEN0095-P   | MMRN1      | snp | 4  | 90857872  | 90857872  | T | G |
| MEN0095-P   | MICU3      | snp | 8  | 16971612  | 16971612  | T | A |
| MEN0095-P   | OR5D18     | snp | 11 | 55587868  | 55587868  | A | T |
| MEN0095-P   | GRB14      | snp | 2  | 165476198 | 165476198 | T | C |
| MEN0095-P   | ADAMTS4    | snp | 1  | 161166610 | 161166610 | C | T |
| MEN0095-P   | MYO15A     | snp | 17 | 18047232  | 18047232  | G | A |
| MEN0095-P   | FAM47B     | snp | X  | 34962036  | 34962036  | G | A |

|           |                |     |    |           |           |   |   |
|-----------|----------------|-----|----|-----------|-----------|---|---|
| MEN0095-P | PCDHGB3        | snp | 5  | 140750929 | 140750929 | A | T |
| MEN0095-P | KIR3DX1        | snp | 19 | 55048103  | 55048103  | C | A |
| MEN0095-P | DDAH1          | snp | 1  | 85816100  | 85816100  | T | G |
| MEN0095-P | MICU3          | snp | 8  | 16971612  | 16971612  | T | A |
| MEN0095-P | OR5D18         | snp | 11 | 55587868  | 55587868  | A | T |
| MEN0095-P | DDAH1          | snp | 1  | 85816100  | 85816100  | T | G |
| MEN0095-P | KIR3DX1        | snp | 19 | 55048103  | 55048103  | C | A |
| MEN0095-P | ADAMTS4        | snp | 1  | 161166610 | 161166610 | C | T |
| MEN0095-P | SLC25A31       | snp | 4  | 128685483 | 128685483 | C | T |
| MEN0095-P | MYO15A         | snp | 17 | 18047232  | 18047232  | G | A |
| MEN0095-P | MMRN1          | snp | 4  | 90857872  | 90857872  | T | G |
| MEN0095-P | PCDHGB3        | snp | 5  | 140750929 | 140750929 | A | T |
| MEN0095-P | GRB14          | snp | 2  | 165476198 | 165476198 | T | C |
| MEN0095-P | FAM47B         | snp | X  | 34962036  | 34962036  | G | A |
| MEN0096-P | XPO7           | snp | 8  | 21851929  | 21851929  | C | T |
| MEN0096-P | PRKCQ          | snp | 10 | 6470255   | 6470255   | C | G |
| MEN0096-P | REV3L          | snp | 6  | 111737490 | 111737490 | C | T |
| MEN0096-P | USP2           | snp | 11 | 119230007 | 119230007 | T | A |
| MEN0096-P | SNX13          | snp | 7  | 17861172  | 17861172  | T | C |
| MEN0096-P | P4HA3          | snp | 11 | 74013532  | 74013532  | T | C |
| MEN0096-P | FLG2           | snp | 1  | 152323673 | 152323673 | A | G |
| MEN0096-P | TRERF1         | snp | 6  | 42236685  | 42236685  | C | T |
| MEN0096-P | TANC2          | snp | 17 | 61278216  | 61278216  | A | T |
| MEN0096-P | KIAA0907       | snp | 1  | 155887393 | 155887393 | T | G |
| MEN0096-P | MAGEC3         | snp | X  | 140984779 | 140984779 | C | A |
| MEN0096-P | MTA1           | snp | 14 | 105926724 | 105926724 | A | G |
| MEN0096-P | OR5F1          | snp | 11 | 55761510  | 55761510  | T | C |
| MEN0096-P | LDLRAD3        | snp | 11 | 36057774  | 36057774  | C | A |
| MEN0096-P | P4HA3          | snp | 11 | 74013532  | 74013532  | T | C |
| MEN0096-P | REV3L          | snp | 6  | 111737490 | 111737490 | C | T |
| MEN0096-P | PRKCQ          | snp | 10 | 6470255   | 6470255   | C | G |
| MEN0096-P | XPO7           | snp | 8  | 21851929  | 21851929  | C | T |
| MEN0096-P | TANC2          | snp | 17 | 61278216  | 61278216  | A | T |
| MEN0096-P | MTA1           | snp | 14 | 105926724 | 105926724 | A | G |
| MEN0096-P | OR5F1          | snp | 11 | 55761510  | 55761510  | T | C |
| MEN0096-P | USP2           | snp | 11 | 119230007 | 119230007 | T | A |
| MEN0096-P | KIAA0907       | snp | 1  | 155887393 | 155887393 | T | G |
| MEN0096-P | SNX13          | snp | 7  | 17861172  | 17861172  | T | C |
| MEN0096-P | TRERF1         | snp | 6  | 42236685  | 42236685  | C | T |
| MEN0096-P | FLG2           | snp | 1  | 152323673 | 152323673 | A | G |
| MEN0096-P | MAGEC3         | snp | X  | 140984779 | 140984779 | C | A |
| MEN0096-P | LDLRAD3        | snp | 11 | 36057774  | 36057774  | C | A |
| MEN0097-P | KIAA1407       | snp | 3  | 113724559 | 113724559 | C | A |
| MEN0097-P | RP11-1407O15.2 | snp | 17 | 36357265  | 36357265  | C | T |
| MEN0097-P | ZBTB25         | snp | 14 | 64954148  | 64954148  | G | T |
| MEN0097-P | MED16          | snp | 19 | 876997    | 876997    | G | A |
| MEN0097-P | CPNE5          | snp | 6  | 36730719  | 36730719  | C | A |



|            |                |     |    |           |           |   |   |
|------------|----------------|-----|----|-----------|-----------|---|---|
| MEN0097-P  | DSCAM          | snp | 21 | 42080449  | 42080449  | T | G |
| MEN0097-P  | KIF4A          | snp | X  | 69510629  | 69510629  | C | T |
| MEN0097-P  | RC3H1          | snp | 1  | 173933296 | 173933296 | G | A |
| MEN0097-P  | KAT6B          | snp | 10 | 76780927  | 76780927  | G | C |
| MEN0097-P  | NFE2L3         | snp | 7  | 26225102  | 26225102  | G | A |
| MEN0097-P  | SLC17A2        | snp | 6  | 25923988  | 25923988  | T | C |
| MEN0097-P  | DCDC2          | snp | 6  | 24178791  | 24178791  | C | T |
| MEN0097-P  | SDK2           | snp | 17 | 71344826  | 71344826  | G | C |
| MEN0097-P  | SPRED1         | snp | 15 | 38643662  | 38643662  | C | G |
| MEN0097-P  | ROCK1          | snp | 18 | 18567057  | 18567057  | G | C |
| MEN0097-P  | RIMS1          | snp | 6  | 72968723  | 72968723  | C | T |
| MEN0097-P  | CSTF3          | snp | 11 | 33118462  | 33118462  | T | C |
| MEN0097-P  | AR             | snp | X  | 66765161  | 66765161  | A | T |
| MEN0097-P  | ATRAID         | snp | 2  | 27439404  | 27439404  | G | C |
| MEN0097-P  | SPRED1         | snp | 15 | 38643248  | 38643248  | C | G |
| MEN0097-P  | CHRN4          | snp | 15 | 78917370  | 78917370  | A | G |
| MEN0097-P  | ZC3H13         | snp | 13 | 46543999  | 46543999  | G | T |
| MEN0097-P  | GAGE2A         | snp | X  | 49355893  | 49355893  | C | G |
| MEN0097-P  | MED16          | snp | 19 | 876997    | 876997    | G | A |
| MEN0097-P  | KIF4A          | snp | X  | 69510629  | 69510629  | C | T |
| MEN0097-P  | KIAA1407       | snp | 3  | 113724559 | 113724559 | C | A |
| MEN0097-P  | KAT6B          | snp | 10 | 76780927  | 76780927  | G | C |
| MEN0097-P  | RC3H1          | snp | 1  | 173933296 | 173933296 | G | A |
| MEN0097-P  | CHRN4          | snp | 15 | 78917370  | 78917370  | A | G |
| MEN0097-P  | ZBTB25         | snp | 14 | 64954148  | 64954148  | G | T |
| MEN0097-P  | AR             | snp | X  | 66765161  | 66765161  | A | T |
| MEN0097-P  | SPRED1         | snp | 15 | 38643662  | 38643662  | C | G |
| MEN0097-P  | CPNE5          | snp | 6  | 36730719  | 36730719  | C | A |
| MEN0097-P  | DSCAM          | snp | 21 | 42080449  | 42080449  | T | G |
| MEN0097-P  | SDK2           | snp | 17 | 71344826  | 71344826  | G | C |
| MEN0097-P  | SPRED1         | snp | 15 | 38643248  | 38643248  | C | G |
| MEN0097-P  | RP11-1407O15.2 | snp | 17 | 36357265  | 36357265  | C | T |
| MEN0097-P  | CSTF3          | snp | 11 | 33118462  | 33118462  | T | C |
| MEN0097-P  | ROCK1          | snp | 18 | 18567057  | 18567057  | G | C |
| MEN0097-P  | SLC17A2        | snp | 6  | 25923988  | 25923988  | T | C |
| MEN0097-P  | DCDC2          | snp | 6  | 24178791  | 24178791  | C | T |
| MEN0097-P  | NFE2L3         | snp | 7  | 26225102  | 26225102  | G | A |
| MEN0097-P  | RIMS1          | snp | 6  | 72968723  | 72968723  | C | T |
| MEN0097-P  | GAGE2A         | snp | X  | 49355893  | 49355893  | C | G |
| MEN0097-P  | ATRAID         | snp | 2  | 27439404  | 27439404  | G | C |
| MEN0097-P  | ZC3H13         | snp | 13 | 46543999  | 46543999  | G | T |
| MEN0097-P1 | DNAH2          | snp | 17 | 7660519   | 7660519   | G | A |
| MEN0097-P1 | MUC17          | snp | 7  | 100684076 | 100684076 | A | G |
| MEN0097-P1 | RPTN           | snp | 1  | 152127891 | 152127891 | T | G |
| MEN0097-P1 | ZNF254         | snp | 19 | 24310294  | 24310294  | T | G |
| MEN0097-P1 | RP11-1407O15.2 | snp | 17 | 36357265  | 36357265  | C | T |
| MEN0097-P1 | ZNF844         | snp | 19 | 12187394  | 12187394  | T | C |

|            |         |     |    |           |           |   |   |
|------------|---------|-----|----|-----------|-----------|---|---|
| MEN0097-P1 | HEATR5B | snp | 2  | 37215951  | 37215951  | G | A |
| MEN0097-P1 | ZNF721  | snp | 4  | 436628    | 436628    | A | T |
| MEN0097-P1 | GPR182  | snp | 12 | 57389222  | 57389222  | G | A |
| MEN0097-P1 | LGR4    | snp | 11 | 27393221  | 27393221  | G | C |
| MEN0097-P1 | MUC7    | snp | 4  | 71346978  | 71346978  | T | C |
| MEN0097-P1 | ZNF681  | snp | 19 | 23926943  | 23926943  | C | A |
| MEN0097-P1 | NP1PB5  | snp | 16 | 22545865  | 22545865  | G | C |
| MEN0097-P1 | TGOLN2  | snp | 2  | 85554530  | 85554530  | T | G |
| MEN0097-P1 | ING4    | snp | 12 | 6761832   | 6761832   | G | A |
| MEN0097-P1 | ZNF727  | snp | 7  | 63538806  | 63538806  | C | G |
| MEN0097-P1 | ZAN     | snp | 7  | 100350052 | 100350052 | T | C |
| MEN0097-P1 | ZNF649  | snp | 19 | 52394736  | 52394736  | T | C |
| MEN0097-P1 | MDC1    | snp | 6  | 30672941  | 30672941  | T | C |
| MEN0097-P1 | ZNF675  | snp | 19 | 23836390  | 23836390  | T | C |
| MEN0097-P1 | NBPF10  | snp | 1  | 145323695 | 145323695 | C | T |
| MEN0097-P1 | ZAN     | snp | 7  | 100349878 | 100349878 | C | T |
| MEN0097-P1 | SDK2    | snp | 17 | 71344826  | 71344826  | G | C |
| MEN0097-P1 | ZNF208  | snp | 19 | 22154342  | 22154342  | A | C |
| MEN0097-P1 | ROCK1   | snp | 18 | 18567057  | 18567057  | G | C |
| MEN0097-P1 | P2RX7   | snp | 12 | 121603964 | 121603964 | G | A |
| MEN0097-P1 | ATP6V1D | snp | 14 | 67814150  | 67814150  | C | T |
| MEN0097-P1 | ZNF708  | snp | 19 | 21477037  | 21477037  | A | C |
| MEN0097-P1 | ZNF649  | snp | 19 | 52394769  | 52394769  | A | C |
| MEN0097-P1 | ATRAID  | snp | 2  | 27439404  | 27439404  | G | C |
| MEN0097-P1 | ZNF736  | snp | 7  | 63809113  | 63809113  | A | G |
| MEN0097-P1 | CHRN4   | snp | 15 | 78917370  | 78917370  | A | G |
| MEN0097-P1 | ZNF479  | snp | 7  | 57187725  | 57187725  | G | T |
| MEN0097-P1 | ZNF736  | snp | 7  | 63809112  | 63809112  | A | G |
| MEN0097-P1 | TGOLN2  | snp | 2  | 85554535  | 85554535  | C | T |
| MEN0097-P1 | ZNF208  | snp | 19 | 22156983  | 22156983  | T | A |
| MEN0097-P1 | ZNF678  | snp | 1  | 227842669 | 227842669 | A | G |
| MEN0097-P1 | FAN1    | snp | 15 | 31197473  | 31197473  | G | A |
| MEN0097-P1 | ZNF43   | snp | 19 | 21990711  | 21990711  | T | C |
| MEN0097-P1 | ZNF708  | snp | 19 | 21476249  | 21476249  | T | C |
| MEN0097-P1 | ZNF844  | snp | 19 | 12187394  | 12187394  | T | C |
| MEN0097-P1 | ZNF681  | snp | 19 | 23926943  | 23926943  | C | A |
| MEN0097-P1 | HEATR5B | snp | 2  | 37215951  | 37215951  | G | A |
| MEN0097-P1 | MUC17   | snp | 7  | 100684076 | 100684076 | A | G |
| MEN0097-P1 | ZNF721  | snp | 4  | 436628    | 436628    | A | T |
| MEN0097-P1 | ZNF254  | snp | 19 | 24310294  | 24310294  | T | G |
| MEN0097-P1 | DNAH2   | snp | 17 | 7660519   | 7660519   | G | A |
| MEN0097-P1 | ING4    | snp | 12 | 6761832   | 6761832   | G | A |
| MEN0097-P1 | GPR182  | snp | 12 | 57389222  | 57389222  | G | A |
| MEN0097-P1 | ZNF649  | snp | 19 | 52394736  | 52394736  | T | C |
| MEN0097-P1 | CHRN4   | snp | 15 | 78917370  | 78917370  | A | G |
| MEN0097-P1 | P2RX7   | snp | 12 | 121603964 | 121603964 | G | A |
| MEN0097-P1 | ZNF708  | snp | 19 | 21477037  | 21477037  | A | C |

|            |                |     |            |           |           |   |   |
|------------|----------------|-----|------------|-----------|-----------|---|---|
| MEN0097-P1 | ZNF727         | snp | 7          | 63538806  | 63538806  | C | G |
| MEN0097-P1 | NPIPB5         | snp | 16         | 22545865  | 22545865  | G | C |
| MEN0097-P1 | ATP6V1D        | snp | 14         | 67814150  | 67814150  | C | T |
| MEN0097-P1 | ZNF736         | snp | 7          | 63809112  | 63809112  | A | G |
| MEN0097-P1 | ZNF708         | snp | 19         | 21476249  | 21476249  | T | C |
| MEN0097-P1 | SDK2           | snp | 17         | 71344826  | 71344826  | G | C |
| MEN0097-P1 | ZNF678         | snp | 1          | 227842669 | 227842669 | A | G |
| MEN0097-P1 | ZNF43          | snp | 19         | 21990711  | 21990711  | T | C |
| MEN0097-P1 | RP11-1407O15.2 | snp | 17         | 36357265  | 36357265  | C | T |
| MEN0097-P1 | ROCK1          | snp | 18         | 18567057  | 18567057  | G | C |
| MEN0097-P1 | NBPF10         | snp | 1          | 145323695 | 145323695 | C | T |
| MEN0097-P1 | MDC1           | snp | 6          | 30672941  | 30672941  | T | C |
| MEN0097-P1 | LGR4           | snp | 11         | 27393221  | 27393221  | G | C |
| MEN0097-P1 | ZNF208         | snp | 19         | 22154342  | 22154342  | A | C |
| MEN0097-P1 | ZNF208         | snp | 19         | 22156983  | 22156983  | T | A |
| MEN0097-P1 | ZAN            | snp | 7          | 100349878 | 100349878 | C | T |
| MEN0097-P1 | FAN1           | snp | 15         | 31197473  | 31197473  | G | A |
| MEN0097-P1 | MUC7           | snp | 4          | 71346978  | 71346978  | T | C |
| MEN0097-P1 | TGOLN2         | snp | 2          | 85554530  | 85554530  | T | G |
| MEN0097-P1 | ZNF479         | snp | 7          | 57187725  | 57187725  | G | T |
| MEN0097-P1 | ATRAID         | snp | 2          | 27439404  | 27439404  | G | C |
| MEN0097-P1 | ZNF675         | snp | 19         | 23836390  | 23836390  | T | C |
| MEN0097-P1 | ZNF649         | snp | 19         | 52394769  | 52394769  | A | C |
| MEN0097-P1 | RPTN           | snp | 1          | 152127891 | 152127891 | T | G |
| MEN0097-P1 | ZAN            | snp | 7          | 100350052 | 100350052 | T | C |
| MEN0097-P2 | DISP1          | snp | 1          | 223176649 | 223176649 | C | T |
| MEN0097-P2 | DHX38          | snp | 16         | 72132559  | 72132559  | C | T |
| MEN0097-P2 | SLC26A11       | snp | 17         | 78215607  | 78215607  | G | T |
| MEN0097-P2 | PPP4R1         | snp | 18         | 9588723   | 9588723   | C | A |
| MEN0097-P2 | ZNF443         | snp | 19         | 12542283  | 12542283  | A | G |
| MEN0097-P2 | FAM73A         | snp | 1          | 78279422  | 78279422  | T | C |
| MEN0097-P2 | ZNF512B        | snp | 20         | 62597771  | 62597771  | G | A |
| MEN0097-P2 | AC011841.1     | snp | 3L000205.1 | 117670    | 117670    | G | A |
| MEN0097-P2 | CNTROB         | snp | 17         | 7838372   | 7838372   | G | A |
| MEN0097-P2 | ITGAE          | snp | 17         | 3665222   | 3665222   | T | G |
| MEN0097-P2 | PLA2G6         | snp | 22         | 38539198  | 38539198  | A | C |
| MEN0097-P2 | BHLHE40        | snp | 3          | 5022077   | 5022077   | A | G |
| MEN0097-P2 | NPIPB5         | snp | 16         | 22545865  | 22545865  | G | C |
| MEN0097-P2 | SYNE2          | snp | 14         | 64490997  | 64490997  | G | T |
| MEN0097-P2 | ITPA           | snp | 20         | 3199240   | 3199240   | C | G |
| MEN0097-P2 | TBR1           | snp | 2          | 162274270 | 162274270 | C | T |
| MEN0097-P2 | ARPP21         | snp | 3          | 35833943  | 35833943  | G | T |
| MEN0097-P2 | ACAN           | snp | 15         | 89398371  | 89398371  | C | A |
| MEN0097-P2 | SLC41A3        | snp | 3          | 125786889 | 125786889 | G | C |
| MEN0097-P2 | TRPM1          | snp | 15         | 31359366  | 31359366  | G | A |
| MEN0097-P2 | CSF2           | snp | 5          | 131411485 | 131411485 | G | C |
| MEN0097-P2 | MED13L         | snp | 12         | 116424160 | 116424160 | C | T |

|            |            |     |            |           |           |   |   |
|------------|------------|-----|------------|-----------|-----------|---|---|
| MEN0097-P2 | COL4A3     | snp | 2          | 228153956 | 228153956 | G | A |
| MEN0097-P2 | DHRS7      | snp | 14         | 60616232  | 60616232  | G | A |
| MEN0097-P2 | PTPRS      | snp | 19         | 5218496   | 5218496   | G | A |
| MEN0097-P2 | FCRL4      | snp | 1          | 157545388 | 157545388 | C | T |
| MEN0097-P2 | SDK2       | snp | 17         | 71344826  | 71344826  | G | C |
| MEN0097-P2 | ROCK1      | snp | 18         | 18567057  | 18567057  | G | C |
| MEN0097-P2 | PPP6R3     | snp | 11         | 68337333  | 68337333  | G | C |
| MEN0097-P2 | ANO3       | snp | 11         | 26681967  | 26681967  | G | T |
| MEN0097-P2 | MUC6       | snp | 11         | 1017526   | 1017526   | G | C |
| MEN0097-P2 | TCHH       | snp | 1          | 152082220 | 152082220 | G | C |
| MEN0097-P2 | NR1H4      | snp | 12         | 100926317 | 100926317 | G | A |
| MEN0097-P2 | ATRAID     | snp | 2          | 27439404  | 27439404  | G | C |
| MEN0097-P2 | TMEM31     | snp | X          | 102967248 | 102967248 | C | A |
| MEN0097-P2 | CHRN4      | snp | 15         | 78917370  | 78917370  | A | G |
| MEN0097-P2 | MUC21      | snp | 6          | 30954947  | 30954947  | A | C |
| MEN0097-P2 | SYNE2      | snp | 14         | 64490997  | 64490997  | G | T |
| MEN0097-P2 | SLC26A11   | snp | 17         | 78215607  | 78215607  | G | T |
| MEN0097-P2 | DHRS7      | snp | 14         | 60616232  | 60616232  | G | A |
| MEN0097-P2 | PPP4R1     | snp | 18         | 9588723   | 9588723   | C | A |
| MEN0097-P2 | COL4A3     | snp | 2          | 228153956 | 228153956 | G | A |
| MEN0097-P2 | BHLHE40    | snp | 3          | 5022077   | 5022077   | A | G |
| MEN0097-P2 | DISP1      | snp | 1          | 223176649 | 223176649 | C | T |
| MEN0097-P2 | FAM73A     | snp | 1          | 78279422  | 78279422  | T | C |
| MEN0097-P2 | ITGAE      | snp | 17         | 3665222   | 3665222   | T | G |
| MEN0097-P2 | ITPA       | snp | 20         | 3199240   | 3199240   | C | G |
| MEN0097-P2 | ARPP21     | snp | 3          | 35833943  | 35833943  | G | T |
| MEN0097-P2 | CNTROB     | snp | 17         | 7838372   | 7838372   | G | A |
| MEN0097-P2 | ZNF512B    | snp | 20         | 62597771  | 62597771  | G | A |
| MEN0097-P2 | CHRN4      | snp | 15         | 78917370  | 78917370  | A | G |
| MEN0097-P2 | TBR1       | snp | 2          | 162274270 | 162274270 | C | T |
| MEN0097-P2 | AC011841.1 | snp | 3L000205.1 | 117670    | 117670    | G | A |
| MEN0097-P2 | SLC41A3    | snp | 3          | 125786889 | 125786889 | G | C |
| MEN0097-P2 | NPIP5      | snp | 16         | 22545865  | 22545865  | G | C |
| MEN0097-P2 | SDK2       | snp | 17         | 71344826  | 71344826  | G | C |
| MEN0097-P2 | MED13L     | snp | 12         | 116424160 | 116424160 | C | T |
| MEN0097-P2 | ACAN       | snp | 15         | 89398371  | 89398371  | C | A |
| MEN0097-P2 | ZNF443     | snp | 19         | 12542283  | 12542283  | A | G |
| MEN0097-P2 | PTPRS      | snp | 19         | 5218496   | 5218496   | G | A |
| MEN0097-P2 | NR1H4      | snp | 12         | 100926317 | 100926317 | G | A |
| MEN0097-P2 | PLA2G6     | snp | 22         | 38539198  | 38539198  | A | C |
| MEN0097-P2 | FCRL4      | snp | 1          | 157545388 | 157545388 | C | T |
| MEN0097-P2 | CSF2       | snp | 5          | 131411485 | 131411485 | G | C |
| MEN0097-P2 | TRPM1      | snp | 15         | 31359366  | 31359366  | G | A |
| MEN0097-P2 | ROCK1      | snp | 18         | 18567057  | 18567057  | G | C |
| MEN0097-P2 | MUC21      | snp | 6          | 30954947  | 30954947  | A | C |
| MEN0097-P2 | MUC6       | snp | 11         | 1017526   | 1017526   | G | C |
| MEN0097-P2 | PPP6R3     | snp | 11         | 68337333  | 68337333  | G | C |

|            |         |     |    |           |           |   |   |
|------------|---------|-----|----|-----------|-----------|---|---|
| MEN0097-P2 | ANO3    | snp | 11 | 26681967  | 26681967  | G | T |
| MEN0097-P2 | DHX38   | snp | 16 | 72132559  | 72132559  | C | T |
| MEN0097-P2 | TMEM31  | snp | X  | 102967248 | 102967248 | C | A |
| MEN0097-P2 | ATRAID  | snp | 2  | 27439404  | 27439404  | G | C |
| MEN0097-P2 | TCHH    | snp | 1  | 152082220 | 152082220 | G | C |
| MEN0097-P3 | KLK8    | snp | 19 | 51504401  | 51504401  | G | A |
| MEN0097-P3 | GABRA2  | snp | 4  | 46252555  | 46252555  | G | A |
| MEN0097-P3 | DHX38   | snp | 16 | 72132559  | 72132559  | C | T |
| MEN0097-P3 | PPP4R1  | snp | 18 | 9588723   | 9588723   | C | A |
| MEN0097-P3 | PDE4DIP | snp | 1  | 145075648 | 145075648 | G | A |
| MEN0097-P3 | UNC13D  | snp | 17 | 73832481  | 73832481  | G | A |
| MEN0097-P3 | TLK2    | snp | 17 | 60673986  | 60673986  | C | T |
| MEN0097-P3 | ITGAE   | snp | 17 | 3665222   | 3665222   | T | G |
| MEN0097-P3 | BHLHE40 | snp | 3  | 5022077   | 5022077   | A | G |
| MEN0097-P3 | SYNE2   | snp | 14 | 64490997  | 64490997  | G | T |
| MEN0097-P3 | ITPA    | snp | 20 | 3199240   | 3199240   | C | G |
| MEN0097-P3 | PLCB3   | snp | 11 | 64029447  | 64029447  | G | A |
| MEN0097-P3 | ARPP21  | snp | 3  | 35833943  | 35833943  | G | T |
| MEN0097-P3 | ACAN    | snp | 15 | 89398371  | 89398371  | C | A |
| MEN0097-P3 | SLC41A3 | snp | 3  | 125786889 | 125786889 | G | C |
| MEN0097-P3 | TRPM1   | snp | 15 | 31359366  | 31359366  | G | A |
| MEN0097-P3 | CSF2    | snp | 5  | 131411485 | 131411485 | G | C |
| MEN0097-P3 | MED13L  | snp | 12 | 116424160 | 116424160 | C | T |
| MEN0097-P3 | COL4A3  | snp | 2  | 228153956 | 228153956 | G | A |
| MEN0097-P3 | FAM47C  | snp | X  | 37028425  | 37028425  | A | G |
| MEN0097-P3 | NACA    | snp | 12 | 57111554  | 57111554  | C | T |
| MEN0097-P3 | PRG4    | snp | 1  | 186276169 | 186276169 | C | A |
| MEN0097-P3 | COL15A1 | snp | 9  | 101816914 | 101816914 | G | T |
| MEN0097-P3 | FCRL4   | snp | 1  | 157545388 | 157545388 | C | T |
| MEN0097-P3 | SDK2    | snp | 17 | 71344826  | 71344826  | G | C |
| MEN0097-P3 | ZAN     | snp | 7  | 100350466 | 100350466 | C | T |
| MEN0097-P3 | ADD2    | snp | 2  | 70922923  | 70922923  | C | T |
| MEN0097-P3 | ROCK1   | snp | 18 | 18567057  | 18567057  | G | C |
| MEN0097-P3 | PPP6R3  | snp | 11 | 68337333  | 68337333  | G | C |
| MEN0097-P3 | TCHH    | snp | 1  | 152082484 | 152082484 | G | T |
| MEN0097-P3 | SLC27A6 | snp | 5  | 128362942 | 128362942 | G | A |
| MEN0097-P3 | NR1H4   | snp | 12 | 100926317 | 100926317 | G | A |
| MEN0097-P3 | ATRAID  | snp | 2  | 27439404  | 27439404  | G | C |
| MEN0097-P3 | TMEM31  | snp | X  | 102967248 | 102967248 | C | A |
| MEN0097-P3 | CHRN4   | snp | 15 | 78917370  | 78917370  | A | G |
| MEN0097-P3 | ZNF623  | snp | 8  | 144733541 | 144733541 | C | A |
| MEN0097-P3 | SYNE2   | snp | 14 | 64490997  | 64490997  | G | T |
| MEN0097-P3 | GABRA2  | snp | 4  | 46252555  | 46252555  | G | A |
| MEN0097-P3 | PPP4R1  | snp | 18 | 9588723   | 9588723   | C | A |
| MEN0097-P3 | COL4A3  | snp | 2  | 228153956 | 228153956 | G | A |
| MEN0097-P3 | BHLHE40 | snp | 3  | 5022077   | 5022077   | A | G |
| MEN0097-P3 | KLK8    | snp | 19 | 51504401  | 51504401  | G | A |

|            |           |     |    |           |           |   |   |
|------------|-----------|-----|----|-----------|-----------|---|---|
| MEN0097-P3 | ITGAE     | snp | 17 | 3665222   | 3665222   | T | G |
| MEN0097-P3 | ITPA      | snp | 20 | 3199240   | 3199240   | C | G |
| MEN0097-P3 | ADD2      | snp | 2  | 70922923  | 70922923  | C | T |
| MEN0097-P3 | SLC27A6   | snp | 5  | 128362942 | 128362942 | G | A |
| MEN0097-P3 | ARPP21    | snp | 3  | 35833943  | 35833943  | G | T |
| MEN0097-P3 | UNC13D    | snp | 17 | 73832481  | 73832481  | G | A |
| MEN0097-P3 | PDE4DIP   | snp | 1  | 145075648 | 145075648 | G | A |
| MEN0097-P3 | CHRN4     | snp | 15 | 78917370  | 78917370  | A | G |
| MEN0097-P3 | SLC41A3   | snp | 3  | 125786889 | 125786889 | G | C |
| MEN0097-P3 | TLK2      | snp | 17 | 60673986  | 60673986  | C | T |
| MEN0097-P3 | SDK2      | snp | 17 | 71344826  | 71344826  | G | C |
| MEN0097-P3 | PLCB3     | snp | 11 | 64029447  | 64029447  | G | A |
| MEN0097-P3 | MED13L    | snp | 12 | 116424160 | 116424160 | C | T |
| MEN0097-P3 | COL15A1   | snp | 9  | 101816914 | 101816914 | G | T |
| MEN0097-P3 | ACAN      | snp | 15 | 89398371  | 89398371  | C | A |
| MEN0097-P3 | ZNF623    | snp | 8  | 144733541 | 144733541 | C | A |
| MEN0097-P3 | FAM47C    | snp | X  | 37028425  | 37028425  | A | G |
| MEN0097-P3 | NR1H4     | snp | 12 | 100926317 | 100926317 | G | A |
| MEN0097-P3 | FCRL4     | snp | 1  | 157545388 | 157545388 | C | T |
| MEN0097-P3 | CSF2      | snp | 5  | 131411485 | 131411485 | G | C |
| MEN0097-P3 | TRPM1     | snp | 15 | 31359366  | 31359366  | G | A |
| MEN0097-P3 | ROCK1     | snp | 18 | 18567057  | 18567057  | G | C |
| MEN0097-P3 | PPP6R3    | snp | 11 | 68337333  | 68337333  | G | C |
| MEN0097-P3 | DHX38     | snp | 16 | 72132559  | 72132559  | C | T |
| MEN0097-P3 | ZAN       | snp | 7  | 100350466 | 100350466 | C | T |
| MEN0097-P3 | PRG4      | snp | 1  | 186276169 | 186276169 | C | A |
| MEN0097-P3 | TMEM31    | snp | X  | 102967248 | 102967248 | C | A |
| MEN0097-P3 | ATRAID    | snp | 2  | 27439404  | 27439404  | G | C |
| MEN0097-P3 | TCHH      | snp | 1  | 152082484 | 152082484 | G | T |
| MEN0097-P3 | NACA      | snp | 12 | 57111554  | 57111554  | C | T |
| MEN0098-P  | SRPK2     | snp | 7  | 104782599 | 104782599 | A | C |
| MEN0098-P  | ANO8      | snp | 19 | 17441024  | 17441024  | C | T |
| MEN0098-P  | RANBP2    | snp | 2  | 109371685 | 109371685 | A | T |
| MEN0098-P  | ANAPC4    | snp | 4  | 25384970  | 25384970  | C | T |
| MEN0098-P  | RNF31     | snp | 14 | 24629560  | 24629560  | C | T |
| MEN0098-P  | TMEM207   | snp | 3  | 190167524 | 190167524 | C | A |
| MEN0098-P  | EYA1      | snp | 8  | 72127722  | 72127722  | T | G |
| MEN0098-P  | C14orf105 | snp | 14 | 57960259  | 57960259  | C | A |
| MEN0098-P  | CCDC80    | snp | 3  | 112357180 | 112357180 | G | C |
| MEN0098-P  | LEPREL2   | snp | 12 | 6939141   | 6939141   | A | T |
| MEN0098-P  | PLCH1     | snp | 3  | 155200438 | 155200438 | T | A |
| MEN0098-P  | KLHL41    | snp | 2  | 170377448 | 170377448 | T | G |
| MEN0098-P  | SERAC1    | snp | 6  | 158535990 | 158535990 | T | G |
| MEN0098-P  | EVA1A     | snp | 2  | 75745256  | 75745256  | G | C |
| MEN0098-P  | SLC35F4   | snp | 14 | 58036652  | 58036652  | G | A |
| MEN0098-P  | NRBF2     | snp | 10 | 64905988  | 64905988  | G | C |
| MEN0098-P  | MED12     | snp | X  | 70357484  | 70357484  | A | G |

|           |           |     |    |           |           |   |   |
|-----------|-----------|-----|----|-----------|-----------|---|---|
| MEN0098-P | RFX3      | snp | 9  | 3293165   | 3293165   | G | A |
| MEN0098-P | DICER1    | snp | 14 | 95579502  | 95579502  | C | G |
| MEN0098-P | DZIP1     | snp | 13 | 96293573  | 96293573  | G | C |
| MEN0098-P | KIAA0141  | snp | 5  | 141314074 | 141314074 | G | A |
| MEN0098-P | NAALADL2  | snp | 3  | 175184770 | 175184770 | G | C |
| MEN0098-P | MYCBP2    | snp | 13 | 77661726  | 77661726  | G | A |
| MEN0098-P | PCDHGA2   | snp | 5  | 140719008 | 140719008 | C | T |
| MEN0098-P | ZNF454    | snp | 5  | 178391777 | 178391777 | C | G |
| MEN0098-P | TATDN2    | snp | 3  | 10312328  | 10312328  | G | C |
| MEN0098-P | CHEK2     | snp | 22 | 29121242  | 29121242  | G | A |
| MEN0098-P | PANK2     | snp | 20 | 3897664   | 3897664   | T | G |
| MEN0098-P | PTPN1     | snp | 20 | 49196458  | 49196458  | C | G |
| MEN0098-P | ZNF443    | snp | 19 | 12542006  | 12542006  | T | C |
| MEN0098-P | ARHGDI1   | snp | 17 | 79826815  | 79826815  | G | A |
| MEN0098-P | GTF2H2    | snp | 5  | 70338020  | 70338020  | A | G |
| MEN0098-P | PRIM1     | snp | 12 | 57135531  | 57135531  | T | C |
| MEN0098-P | RPH3AL    | snp | 17 | 69510     | 69510     | C | A |
| MEN0098-P | RARA      | snp | 17 | 38508601  | 38508601  | C | G |
| MEN0098-P | EXO1      | snp | 1  | 242015703 | 242015703 | T | C |
| MEN0098-P | HSPH1     | snp | 13 | 31725120  | 31725120  | A | C |
| MEN0098-P | FAM135B   | snp | 8  | 139278031 | 139278031 | A | T |
| MEN0098-P | USP9X     | snp | X  | 41029361  | 41029361  | G | A |
| MEN0098-P | COPB2     | snp | 3  | 139085426 | 139085426 | T | G |
| MEN0098-P | CAPN5     | snp | 11 | 76823801  | 76823801  | G | A |
| MEN0098-P | BACH1     | snp | 21 | 30714858  | 30714858  | G | C |
| MEN0098-P | MAN2A2    | snp | 15 | 91459428  | 91459428  | A | T |
| MEN0098-P | VPS13A    | snp | 9  | 79934489  | 79934489  | T | A |
| MEN0098-P | KIT       | snp | 4  | 55573422  | 55573422  | T | C |
| MEN0098-P | ZNF607    | snp | 19 | 38190605  | 38190605  | G | C |
| MEN0098-P | ADAMTS9   | snp | 3  | 64601713  | 64601713  | G | T |
| MEN0098-P | KRTAP21-1 | snp | 21 | 32127683  | 32127683  | T | C |
| MEN0098-P | EYA1      | snp | 8  | 72127722  | 72127722  | T | G |
| MEN0098-P | PLCH1     | snp | 3  | 155200438 | 155200438 | T | A |
| MEN0098-P | PLCH1     | snp | 3  | 155200438 | 155200438 | T | A |
| MEN0098-P | PLCH1     | snp | 3  | 155200438 | 155200438 | T | A |
| MEN0098-P | ANO8      | snp | 19 | 17441024  | 17441024  | C | T |
| MEN0098-P | MAN2A2    | snp | 15 | 91459428  | 91459428  | A | T |
| MEN0098-P | PANK2     | snp | 20 | 3897664   | 3897664   | T | G |
| MEN0098-P | USP9X     | snp | X  | 41029361  | 41029361  | G | A |
| MEN0098-P | KIAA0141  | snp | 5  | 141314074 | 141314074 | G | A |
| MEN0098-P | SERAC1    | snp | 6  | 158535990 | 158535990 | T | G |
| MEN0098-P | MYCBP2    | snp | 13 | 77661726  | 77661726  | G | A |
| MEN0098-P | BBS5      | snp | 2  | 170377448 | 170377448 | T | G |
| MEN0098-P | FAM135B   | snp | 8  | 139278031 | 139278031 | A | T |
| MEN0098-P | FAM135B   | snp | 8  | 139278031 | 139278031 | A | T |
| MEN0098-P | FAM135B   | snp | 8  | 139278031 | 139278031 | A | T |
| MEN0098-P | LEPREL2   | snp | 12 | 6939141   | 6939141   | A | T |

|           |              |     |    |           |           |   |   |
|-----------|--------------|-----|----|-----------|-----------|---|---|
| MEN0098-P | C14orf105    | snp | 14 | 57960259  | 57960259  | C | A |
| MEN0098-P | PRIM1        | snp | 12 | 57135531  | 57135531  | T | C |
| MEN0098-P | ZNF607       | snp | 19 | 38190605  | 38190605  | G | C |
| MEN0098-P | BACH1        | snp | 21 | 30714858  | 30714858  | G | C |
| MEN0098-P | DZIP1        | snp | 13 | 96293573  | 96293573  | G | C |
| MEN0098-P | RFX3         | snp | 9  | 3293165   | 3293165   | G | A |
| MEN0098-P | CHEK2        | snp | 22 | 29121242  | 29121242  | G | A |
| MEN0098-P | VPS13A       | snp | 9  | 79934489  | 79934489  | T | A |
| MEN0098-P | TMEM207      | snp | 3  | 190167524 | 190167524 | C | A |
| MEN0098-P | ANAPC4       | snp | 4  | 25384970  | 25384970  | C | T |
| MEN0098-P | GTF2H2       | snp | 5  | 70338020  | 70338020  | A | G |
| MEN0098-P | NAALADL2     | snp | 3  | 175184770 | 175184770 | G | C |
| MEN0098-P | SRPK2        | snp | 7  | 104782599 | 104782599 | A | C |
| MEN0098-P | RANBP2       | snp | 2  | 109371685 | 109371685 | A | T |
| MEN0098-P | SLC35F4      | snp | 14 | 58036652  | 58036652  | G | A |
| MEN0098-P | CAPN5        | snp | 11 | 76823801  | 76823801  | G | A |
| MEN0098-P | RPH3AL       | snp | 17 | 69510     | 69510     | C | A |
| MEN0098-P | RNF31        | snp | 14 | 24629560  | 24629560  | C | T |
| MEN0098-P | ZNF443       | snp | 19 | 12542006  | 12542006  | T | C |
| MEN0098-P | RARA         | snp | 17 | 38508601  | 38508601  | C | G |
| MEN0098-P | ARHGDI A     | snp | 17 | 79826815  | 79826815  | G | A |
| MEN0098-P | ZNF454       | snp | 5  | 178391777 | 178391777 | C | G |
| MEN0098-P | EVA1A        | snp | 2  | 75745256  | 75745256  | G | C |
| MEN0098-P | MED12        | snp | X  | 70357484  | 70357484  | A | G |
| MEN0098-P | COPB2        | snp | 3  | 139085426 | 139085426 | T | G |
| MEN0098-P | CCDC80       | snp | 3  | 112357180 | 112357180 | G | C |
| MEN0098-P | PTPN1        | snp | 20 | 49196458  | 49196458  | C | G |
| MEN0098-P | RP11-438J1.1 | snp | 3  | 10312328  | 10312328  | G | C |
| MEN0098-P | PCDHGA2      | snp | 5  | 140719008 | 140719008 | C | T |
| MEN0098-P | NRBF2        | snp | 10 | 64905988  | 64905988  | G | C |
| MEN0098-P | DICER1       | snp | 14 | 95579502  | 95579502  | C | G |
| MEN0098-P | ADAMTS9      | snp | 3  | 64601713  | 64601713  | G | T |
| MEN0098-P | KIT          | snp | 4  | 55573422  | 55573422  | T | C |
| MEN0098-P | HSPH1        | snp | 13 | 31725120  | 31725120  | A | C |
| MEN0098-P | EXO1         | snp | 1  | 242015703 | 242015703 | T | C |
| MEN0098-P | KRTAP21-1    | snp | 21 | 32127683  | 32127683  | T | C |
| MEN0099-P | CEP68        | snp | 2  | 65299689  | 65299689  | G | A |
| MEN0099-P | CRISP3       | snp | 6  | 49700981  | 49700981  | C | T |
| MEN0099-P | TBRG4        | snp | 7  | 45143798  | 45143798  | G | A |
| MEN0099-P | EP400NL      | snp | 12 | 132589753 | 132589753 | G | T |
| MEN0099-P | FBXO42       | snp | 1  | 16578872  | 16578872  | T | A |
| MEN0099-P | FLNB         | snp | 3  | 58124201  | 58124201  | T | C |
| MEN0099-P | FRG1B        | snp | 20 | 29628243  | 29628243  | T | C |
| MEN0099-P | BDP1         | snp | 5  | 70791213  | 70791213  | G | T |
| MEN0099-P | TRIM51       | snp | 11 | 55658957  | 55658957  | C | T |
| MEN0099-P | NWD1         | snp | 19 | 16874756  | 16874756  | G | A |
| MEN0099-P | HNRNPK       | snp | 9  | 86589456  | 86589456  | C | G |



|           |         |     |    |           |           |   |   |
|-----------|---------|-----|----|-----------|-----------|---|---|
| MEN0099-P | HSPA1L  | snp | 6  | 31778516  | 31778516  | T | G |
| MEN0099-P | PTCHD4  | snp | 6  | 47846682  | 47846682  | G | C |
| MEN0099-P | USP47   | snp | 11 | 11962008  | 11962008  | A | G |
| MEN0099-P | FCER1A  | snp | 1  | 159277630 | 159277630 | C | A |
| MEN0099-P | SIRPB1  | snp | 20 | 1585397   | 1585397   | T | C |
| MEN0099-P | DPYSL5  | snp | 2  | 27164854  | 27164854  | G | A |
| MEN0099-P | PRR5L   | snp | 11 | 36467889  | 36467889  | T | C |
| MEN0099-P | KLK13   | snp | 19 | 51563084  | 51563084  | T | C |
| MEN0099-P | CPNE7   | snp | 16 | 89645279  | 89645279  | G | T |
| MEN0099-P | ATP2A3  | snp | 17 | 3844317   | 3844317   | T | A |
| MEN0099-P | VASN    | snp | 16 | 4431578   | 4431578   | G | T |
| MEN0099-P | TSPYL2  | snp | X  | 53112391  | 53112391  | C | G |
| MEN0099-P | PSD3    | snp | 8  | 18430064  | 18430064  | G | C |
| MEN0099-P | GCC2    | snp | 2  | 109087980 | 109087980 | A | T |
| MEN0099-P | NYX     | snp | X  | 41333781  | 41333781  | G | A |
| MEN0099-P | COL7A1  | snp | 3  | 48625813  | 48625813  | C | T |
| MEN0099-P | ACAT1   | snp | 11 | 108005005 | 108005005 | A | G |
| MEN0099-P | CBLB    | snp | 3  | 105400400 | 105400400 | G | C |
| MEN0099-P | VASN    | snp | 16 | 4431578   | 4431578   | G | T |
| MEN0099-P | TBRG4   | snp | 7  | 45143798  | 45143798  | G | A |
| MEN0099-P | DPYSL5  | snp | 2  | 27164854  | 27164854  | G | A |
| MEN0099-P | TSPYL2  | snp | X  | 53112391  | 53112391  | C | G |
| MEN0099-P | CEP68   | snp | 2  | 65299689  | 65299689  | G | A |
| MEN0099-P | PSD3    | snp | 8  | 18430064  | 18430064  | G | C |
| MEN0099-P | ATP2A3  | snp | 17 | 3844317   | 3844317   | T | A |
| MEN0099-P | PRR5L   | snp | 11 | 36467889  | 36467889  | T | C |
| MEN0099-P | PTCHD4  | snp | 6  | 47846682  | 47846682  | G | C |
| MEN0099-P | FCER1A  | snp | 1  | 159277630 | 159277630 | C | A |
| MEN0099-P | TRIM51  | snp | 11 | 55658957  | 55658957  | C | T |
| MEN0099-P | USP47   | snp | 11 | 11962008  | 11962008  | A | G |
| MEN0099-P | EP400NL | snp | 12 | 132589753 | 132589753 | G | T |
| MEN0099-P | FLNB    | snp | 3  | 58124201  | 58124201  | T | C |
| MEN0099-P | GCC2    | snp | 2  | 109087980 | 109087980 | A | T |
| MEN0099-P | CPNE7   | snp | 16 | 89645279  | 89645279  | G | T |
| MEN0099-P | HSPA1L  | snp | 6  | 31778516  | 31778516  | T | G |
| MEN0099-P | FBXO42  | snp | 1  | 16578872  | 16578872  | T | A |
| MEN0099-P | HNRNPK  | snp | 9  | 86589456  | 86589456  | C | G |
| MEN0099-P | FRG1B   | snp | 20 | 29628243  | 29628243  | T | C |
| MEN0099-P | CRISP3  | snp | 6  | 49700981  | 49700981  | C | T |
| MEN0099-P | COL7A1  | snp | 3  | 48625813  | 48625813  | C | T |
| MEN0099-P | NWD1    | snp | 19 | 16874756  | 16874756  | G | A |
| MEN0099-P | SIRPB1  | snp | 20 | 1585397   | 1585397   | T | C |
| MEN0099-P | BDP1    | snp | 5  | 70791213  | 70791213  | G | T |
| MEN0099-P | KLK13   | snp | 19 | 51563084  | 51563084  | T | C |
| MEN0099-P | ACAT1   | snp | 11 | 108005005 | 108005005 | A | G |
| MEN0099-P | NYX     | snp | X  | 41333781  | 41333781  | G | A |
| MEN0099-P | CBLB    | snp | 3  | 105400400 | 105400400 | G | C |

|            |         |     |    |           |           |   |   |
|------------|---------|-----|----|-----------|-----------|---|---|
| MEN0100-P  | BARX2   | snp | 11 | 129306661 | 129306661 | G | A |
| MEN0100-P  | MGLL    | snp | 3  | 127441353 | 127441353 | C | T |
| MEN0100-P  | ATP2A2  | snp | 12 | 110783126 | 110783126 | T | G |
| MEN0100-P  | POTEC   | snp | 18 | 14513675  | 14513675  | T | C |
| MEN0100-P  | MCM2    | snp | 3  | 127327280 | 127327280 | C | T |
| MEN0100-P  | UBN2    | snp | 7  | 138969055 | 138969055 | C | T |
| MEN0100-P  | PHLDB2  | snp | 3  | 111603964 | 111603964 | C | T |
| MEN0100-P  | SON     | snp | 21 | 34924415  | 34924415  | C | A |
| MEN0100-P  | WDR90   | snp | 16 | 715992    | 715992    | C | G |
| MEN0100-P  | CAMTA1  | snp | 1  | 7723547   | 7723547   | G | A |
| MEN0100-P  | MGLL    | snp | 3  | 127441353 | 127441353 | C | T |
| MEN0100-P  | ATP2A2  | snp | 12 | 110783126 | 110783126 | T | G |
| MEN0100-P  | BARX2   | snp | 11 | 129306661 | 129306661 | G | A |
| MEN0100-P  | PHLDB2  | snp | 3  | 111603964 | 111603964 | C | T |
| MEN0100-P  | UBN2    | snp | 7  | 138969055 | 138969055 | C | T |
| MEN0100-P  | MCM2    | snp | 3  | 127327280 | 127327280 | C | T |
| MEN0100-P  | SON     | snp | 21 | 34924415  | 34924415  | C | A |
| MEN0100-P  | WDR90   | snp | 16 | 715992    | 715992    | C | G |
| MEN0100-P  | POTEC   | snp | 18 | 14513675  | 14513675  | T | C |
| MEN0100-P  | CAMTA1  | snp | 1  | 7723547   | 7723547   | G | A |
| MEN0101-PO | NINL    | snp | 20 | 25460868  | 25460868  | T | A |
| MEN0101-PO | VOPP1   | snp | 7  | 55560037  | 55560037  | G | A |
| MEN0101-PO | ZNF419  | snp | 19 | 58005146  | 58005146  | C | G |
| MEN0101-PO | SCN9A   | snp | 2  | 167133716 | 167133716 | C | T |
| MEN0101-PO | KIFC3   | snp | 16 | 57805243  | 57805243  | C | T |
| MEN0101-PO | MST1R   | snp | 3  | 49941029  | 49941029  | G | A |
| MEN0101-PO | SCARB1  | snp | 12 | 125298833 | 125298833 | C | T |
| MEN0101-PO | SLAMF6  | snp | 1  | 160466156 | 160466156 | G | A |
| MEN0101-PO | TRAPPC8 | snp | 18 | 29437582  | 29437582  | G | A |
| MEN0101-PO | SLC9A3  | snp | 5  | 482812    | 482812    | G | A |
| MEN0101-PO | TTC14   | snp | 3  | 180327775 | 180327775 | A | G |
| MEN0101-PO | LGI3    | snp | 8  | 22011505  | 22011505  | C | T |
| MEN0101-PO | NECAB2  | snp | 16 | 84012099  | 84012099  | G | A |
| MEN0101-PO | ZNF678  | snp | 1  | 227842427 | 227842427 | G | A |
| MEN0101-PO | ZNF91   | snp | 19 | 23544867  | 23544867  | T | C |
| MEN0101-PO | GEMIN4  | snp | 17 | 650244    | 650244    | G | A |
| MEN0101-PO | CD209   | snp | 19 | 7810766   | 7810766   | C | T |
| MEN0101-PO | PGM2L1  | snp | 11 | 74057793  | 74057793  | C | T |
| MEN0101-PO | RHOT1   | snp | 17 | 30535250  | 30535250  | C | T |
| MEN0101-PO | TBC1D3F | snp | 17 | 36288207  | 36288207  | C | T |
| MEN0101-PO | KCNB1   | snp | 20 | 47990392  | 47990392  | C | T |
| MEN0101-PO | TFG     | snp | 3  | 100447576 | 100447576 | C | T |
| MEN0101-PO | SNX13   | snp | 7  | 17838675  | 17838675  | G | T |
| MEN0101-PO | NBPF14  | snp | 1  | 148012533 | 148012533 | T | G |
| MEN0101-PO | ZNF708  | snp | 19 | 21476898  | 21476898  | T | G |
| MEN0101-PO | ZNF844  | snp | 19 | 12187275  | 12187275  | G | C |
| MEN0101-PO | ZNF208  | snp | 19 | 22155896  | 22155896  | A | C |

|            |           |     |    |           |           |   |   |
|------------|-----------|-----|----|-----------|-----------|---|---|
| MEN0101-P0 | ZNF737    | snp | 19 | 20728254  | 20728254  | C | G |
| MEN0101-P0 | ZNF708    | snp | 19 | 21476519  | 21476519  | T | C |
| MEN0101-P0 | CAPRIN2   | snp | 12 | 30881677  | 30881677  | A | T |
| MEN0101-P0 | TLE1      | snp | 9  | 84249141  | 84249141  | G | T |
| MEN0101-P0 | NAF1      | snp | 4  | 164066964 | 164066964 | A | C |
| MEN0101-P0 | MOV10     | snp | 1  | 113232135 | 113232135 | G | A |
| MEN0101-P0 | ZNF433    | snp | 19 | 12125945  | 12125945  | C | A |
| MEN0101-P0 | CDH9      | snp | 5  | 26889966  | 26889966  | A | C |
| MEN0101-P0 | ZNF99     | snp | 19 | 22940775  | 22940775  | C | T |
| MEN0101-P0 | ZNF676    | snp | 19 | 22363039  | 22363039  | T | C |
| MEN0101-P0 | ZNF749    | snp | 19 | 57955885  | 57955885  | C | G |
| MEN0101-P0 | CEP85L    | snp | 6  | 118801571 | 118801571 | C | A |
| MEN0101-P0 | CAPRIN2   | snp | 12 | 30881678  | 30881678  | C | G |
| MEN0101-P0 | ZNF708    | snp | 19 | 21476249  | 21476249  | T | C |
| MEN0101-P0 | ATP6AP2   | snp | X  | 40450514  | 40450514  | G | A |
| MEN0101-P0 | SPRY1     | snp | 4  | 124323120 | 124323120 | G | A |
| MEN0101-P0 | CGREF1    | snp | 2  | 27324405  | 27324405  | T | C |
| MEN0101-P0 | KRTAP1-3  | snp | 17 | 39190779  | 39190779  | T | C |
| MEN0101-P0 | KCNH8     | snp | 3  | 19190281  | 19190281  | G | A |
| MEN0101-P0 | ZNF730    | snp | 19 | 23328831  | 23328831  | A | G |
| MEN0101-P0 | TGOLN2    | snp | 2  | 85554367  | 85554367  | T | C |
| MEN0101-P0 | KRTAP4-11 | snp | 17 | 39274416  | 39274416  | C | T |
| MEN0101-P0 | GTF2F1    | snp | 19 | 6381016   | 6381016   | G | A |
| MEN0101-P0 | C2orf16   | snp | 2  | 27804477  | 27804477  | G | A |
| MEN0101-P0 | VOPP1     | snp | 7  | 55560037  | 55560037  | G | A |
| MEN0101-P0 | ZNF737    | snp | 19 | 20728254  | 20728254  | C | G |
| MEN0101-P0 | SNX13     | snp | 7  | 17838675  | 17838675  | G | T |
| MEN0101-P0 | MOV10     | snp | 1  | 113232135 | 113232135 | G | A |
| MEN0101-P0 | SLC9A3    | snp | 5  | 482812    | 482812    | G | A |
| MEN0101-P0 | ZNF749    | snp | 19 | 57955885  | 57955885  | C | G |
| MEN0101-P0 | TFG       | snp | 3  | 100447576 | 100447576 | C | T |
| MEN0101-P0 | KRTAP1-3  | snp | 17 | 39190779  | 39190779  | T | C |
| MEN0101-P0 | SPRY1     | snp | 4  | 124323120 | 124323120 | G | A |
| MEN0101-P0 | NINL      | snp | 20 | 25460868  | 25460868  | T | A |
| MEN0101-P0 | ATP6AP2   | snp | X  | 40450514  | 40450514  | G | A |
| MEN0101-P0 | ZNF676    | snp | 19 | 22363039  | 22363039  | T | C |
| MEN0101-P0 | ZNF208    | snp | 19 | 22155896  | 22155896  | A | C |
| MEN0101-P0 | ZNF844    | snp | 19 | 12187275  | 12187275  | G | C |
| MEN0101-P0 | KCNH8     | snp | 3  | 19190281  | 19190281  | G | A |
| MEN0101-P0 | CD209     | snp | 19 | 7810766   | 7810766   | C | T |
| MEN0101-P0 | ZNF91     | snp | 19 | 23544867  | 23544867  | T | C |
| MEN0101-P0 | TBC1D3F   | snp | 17 | 36288207  | 36288207  | C | T |
| MEN0101-P0 | ZNF99     | snp | 19 | 22940775  | 22940775  | C | T |
| MEN0101-P0 | SCARB1    | snp | 12 | 125298833 | 125298833 | C | T |
| MEN0101-P0 | CAPRIN2   | snp | 12 | 30881677  | 30881677  | A | T |
| MEN0101-P0 | MST1R     | snp | 3  | 49941029  | 49941029  | G | A |
| MEN0101-P0 | SLAMF6    | snp | 1  | 160466156 | 160466156 | G | A |

|            |           |     |    |           |           |   |   |
|------------|-----------|-----|----|-----------|-----------|---|---|
| MEN0101-P0 | ZNF433    | snp | 19 | 12125945  | 12125945  | C | A |
| MEN0101-P0 | ZNF419    | snp | 19 | 58005146  | 58005146  | C | G |
| MEN0101-P0 | SCN9A     | snp | 2  | 167133716 | 167133716 | C | T |
| MEN0101-P0 | NAF1      | snp | 4  | 164066964 | 164066964 | A | C |
| MEN0101-P0 | ZNF708    | snp | 19 | 21476519  | 21476519  | T | C |
| MEN0101-P0 | TTC14     | snp | 3  | 180327775 | 180327775 | A | G |
| MEN0101-P0 | NECAB2    | snp | 16 | 84012099  | 84012099  | G | A |
| MEN0101-P0 | RHOT1     | snp | 17 | 30535250  | 30535250  | C | T |
| MEN0101-P0 | ZNF708    | snp | 19 | 21476249  | 21476249  | T | C |
| MEN0101-P0 | ZNF678    | snp | 1  | 227842427 | 227842427 | G | A |
| MEN0101-P0 | CDH9      | snp | 5  | 26889966  | 26889966  | A | C |
| MEN0101-P0 | NBPF14    | snp | 1  | 148012533 | 148012533 | T | G |
| MEN0101-P0 | TRAPPC8   | snp | 18 | 29437582  | 29437582  | G | A |
| MEN0101-P0 | ZNF730    | snp | 19 | 23328831  | 23328831  | A | G |
| MEN0101-P0 | TGOLN2    | snp | 2  | 85554367  | 85554367  | T | C |
| MEN0101-P0 | TLE1      | snp | 9  | 84249141  | 84249141  | G | T |
| MEN0101-P0 | KCNB1     | snp | 20 | 47990392  | 47990392  | C | T |
| MEN0101-P0 | ZNF708    | snp | 19 | 21476898  | 21476898  | T | G |
| MEN0101-P0 | LGI3      | snp | 8  | 22011505  | 22011505  | C | T |
| MEN0101-P0 | GEMIN4    | snp | 17 | 650244    | 650244    | G | A |
| MEN0101-P0 | GTF2F1    | snp | 19 | 6381016   | 6381016   | G | A |
| MEN0101-P0 | CGREF1    | snp | 2  | 27324405  | 27324405  | T | C |
| MEN0101-P0 | KIFC3     | snp | 16 | 57805243  | 57805243  | C | T |
| MEN0101-P0 | PGM2L1    | snp | 11 | 74057793  | 74057793  | C | T |
| MEN0101-P0 | CEP85L    | snp | 6  | 118801571 | 118801571 | C | A |
| MEN0101-P0 | C2orf16   | snp | 2  | 27804477  | 27804477  | G | A |
| MEN0101-P0 | KRTAP4-11 | snp | 17 | 39274416  | 39274416  | C | T |
| MEN0101-P1 | ALG10     | snp | 12 | 34179619  | 34179619  | A | T |
| MEN0101-P1 | SVEP1     | snp | 9  | 113170636 | 113170636 | C | A |
| MEN0101-P1 | VOPP1     | snp | 7  | 55560037  | 55560037  | G | A |
| MEN0101-P1 | OR52E6    | snp | 11 | 5863012   | 5863012   | A | G |
| MEN0101-P1 | TTC37     | snp | 5  | 94856484  | 94856484  | G | C |
| MEN0101-P1 | ZNF831    | snp | 20 | 57767937  | 57767937  | G | C |
| MEN0101-P1 | DONSON    | snp | 21 | 34955892  | 34955892  | G | C |
| MEN0101-P1 | GRIA1     | snp | 5  | 153085383 | 153085383 | G | T |
| MEN0101-P1 | NLRP10    | snp | 11 | 7981447   | 7981447   | T | G |
| MEN0101-P1 | RNF135    | snp | 17 | 29326126  | 29326126  | G | C |
| MEN0101-P1 | ARID4B    | snp | 1  | 235384900 | 235384900 | A | T |
| MEN0101-P1 | USH1C     | snp | 11 | 17523521  | 17523521  | G | A |
| MEN0101-P1 | LGI3      | snp | 8  | 22011505  | 22011505  | C | T |
| MEN0101-P1 | ADAM22    | snp | 7  | 87810838  | 87810838  | T | A |
| MEN0101-P1 | ZNF687    | snp | 1  | 151259363 | 151259363 | T | A |
| MEN0101-P1 | ABCA8     | snp | 17 | 66898860  | 66898860  | T | C |
| MEN0101-P1 | TFG       | snp | 3  | 100447576 | 100447576 | C | T |
| MEN0101-P1 | ZNF442    | snp | 19 | 12461974  | 12461974  | G | A |
| MEN0101-P1 | HELZ2     | snp | 20 | 62195703  | 62195703  | T | C |
| MEN0101-P1 | GNG2      | snp | 14 | 52433364  | 52433364  | A | G |

|            |           |     |    |           |           |   |   |
|------------|-----------|-----|----|-----------|-----------|---|---|
| MEN0101-P1 | ENTPD8    | snp | 9  | 140330478 | 140330478 | C | T |
| MEN0101-P1 | LRBA      | snp | 4  | 151207126 | 151207126 | G | A |
| MEN0101-P1 | UBE2S     | snp | 19 | 55918233  | 55918233  | A | G |
| MEN0101-P1 | ZNF442    | snp | 19 | 12461977  | 12461977  | T | A |
| MEN0101-P1 | SCN10A    | snp | 3  | 38743475  | 38743475  | C | G |
| MEN0101-P1 | MMP28     | snp | 17 | 34097303  | 34097303  | G | C |
| MEN0101-P1 | MAGED1    | snp | X  | 51639619  | 51639619  | G | T |
| MEN0101-P1 | EGLN2     | snp | 19 | 41306722  | 41306722  | G | A |
| MEN0101-P1 | PIK3C2B   | snp | 1  | 204435934 | 204435934 | G | A |
| MEN0101-P1 | STXBP5L   | snp | 3  | 121134750 | 121134750 | A | G |
| MEN0101-P1 | SDCBP     | snp | 8  | 59490691  | 59490691  | G | A |
| MEN0101-P1 | SYVN1     | snp | 11 | 64896082  | 64896082  | G | C |
| MEN0101-P1 | ZNF814    | snp | 19 | 58385546  | 58385546  | G | T |
| MEN0101-P1 | KRTAP4-11 | snp | 17 | 39274416  | 39274416  | C | T |
| MEN0101-P1 | NEK6      | snp | 9  | 127074797 | 127074797 | A | G |
| MEN0101-P1 | SCN9A     | snp | 2  | 167168161 | 167168161 | T | G |
| MEN0101-P1 | PDIA4     | snp | 7  | 148718171 | 148718171 | C | T |
| MEN0101-P1 | KRTAP4-11 | snp | 17 | 39274214  | 39274214  | G | C |
| MEN0101-P1 | HELZ2     | snp | 20 | 62195703  | 62195703  | T | C |
| MEN0101-P1 | VOPP1     | snp | 7  | 55560037  | 55560037  | G | A |
| MEN0101-P1 | USH1C     | snp | 11 | 17523521  | 17523521  | G | A |
| MEN0101-P1 | DONSON    | snp | 21 | 34955892  | 34955892  | G | C |
| MEN0101-P1 | TFG       | snp | 3  | 100447576 | 100447576 | C | T |
| MEN0101-P1 | GRIA1     | snp | 5  | 153085383 | 153085383 | G | T |
| MEN0101-P1 | TTC37     | snp | 5  | 94856484  | 94856484  | G | C |
| MEN0101-P1 | ARID4B    | snp | 1  | 235384900 | 235384900 | A | T |
| MEN0101-P1 | OR52E6    | snp | 11 | 5863012   | 5863012   | A | G |
| MEN0101-P1 | ZNF831    | snp | 20 | 57767937  | 57767937  | G | C |
| MEN0101-P1 | NLRP10    | snp | 11 | 7981447   | 7981447   | T | G |
| MEN0101-P1 | SCN10A    | snp | 3  | 38743475  | 38743475  | C | G |
| MEN0101-P1 | ADAM22    | snp | 7  | 87810838  | 87810838  | T | A |
| MEN0101-P1 | SYVN1     | snp | 11 | 64896082  | 64896082  | G | C |
| MEN0101-P1 | SVEP1     | snp | 9  | 113170636 | 113170636 | C | A |
| MEN0101-P1 | ALG10     | snp | 12 | 34179619  | 34179619  | A | T |
| MEN0101-P1 | ZNF442    | snp | 19 | 12461974  | 12461974  | G | A |
| MEN0101-P1 | PIK3C2B   | snp | 1  | 204435934 | 204435934 | G | A |
| MEN0101-P1 | ZNF814    | snp | 19 | 58385546  | 58385546  | G | T |
| MEN0101-P1 | ENTPD8    | snp | 9  | 140330478 | 140330478 | C | T |
| MEN0101-P1 | MAGED1    | snp | X  | 51639619  | 51639619  | G | T |
| MEN0101-P1 | MMP28     | snp | 17 | 34097303  | 34097303  | G | C |
| MEN0101-P1 | ABCA8     | snp | 17 | 66898860  | 66898860  | T | C |
| MEN0101-P1 | LGI3      | snp | 8  | 22011505  | 22011505  | C | T |
| MEN0101-P1 | STXBP5L   | snp | 3  | 121134750 | 121134750 | A | G |
| MEN0101-P1 | SCN9A     | snp | 2  | 167168161 | 167168161 | T | G |
| MEN0101-P1 | LRBA      | snp | 4  | 151207126 | 151207126 | G | A |
| MEN0101-P1 | NEK6      | snp | 9  | 127074797 | 127074797 | A | G |
| MEN0101-P1 | RNF135    | snp | 17 | 29326126  | 29326126  | G | C |

|            |            |     |            |           |           |   |   |
|------------|------------|-----|------------|-----------|-----------|---|---|
| MEN0101-P1 | SDCBP      | snp | 8          | 59490691  | 59490691  | G | A |
| MEN0101-P1 | GNG2       | snp | 14         | 52433364  | 52433364  | A | G |
| MEN0101-P1 | EGLN2      | snp | 19         | 41306722  | 41306722  | G | A |
| MEN0101-P1 | ZNF687     | snp | 1          | 151259363 | 151259363 | T | A |
| MEN0101-P1 | KRTAP4-11  | snp | 17         | 39274214  | 39274214  | G | C |
| MEN0101-P1 | UBE2S      | snp | 19         | 55918233  | 55918233  | A | G |
| MEN0101-P1 | KRTAP4-11  | snp | 17         | 39274416  | 39274416  | C | T |
| MEN0101-P1 | PDIA4      | snp | 7          | 148718171 | 148718171 | C | T |
| MEN0102-P  | ZAN        | snp | 7          | 100365542 | 100365542 | C | A |
| MEN0102-P  | TBC1D31    | snp | 8          | 124132401 | 124132401 | T | A |
| MEN0102-P  | CHEK2      | snp | 22         | 29091840  | 29091840  | T | C |
| MEN0102-P  | CDK20      | snp | 9          | 90584208  | 90584208  | C | T |
| MEN0102-P  | NOTCH2     | snp | 1          | 120469147 | 120469147 | T | C |
| MEN0102-P  | NOTCH2NL   | snp | 1          | 145281473 | 145281473 | T | G |
| MEN0102-P  | BRCA2      | snp | 13         | 32911929  | 32911929  | A | G |
| MEN0102-P  | MT-ATP6    | snp | MT         | 8902      | 8902      | G | A |
| MEN0102-P  | TBC1D31    | snp | 8          | 124132401 | 124132401 | T | A |
| MEN0102-P  | ZAN        | snp | 7          | 100365542 | 100365542 | C | A |
| MEN0102-P  | CHEK2      | snp | 22         | 29091840  | 29091840  | T | C |
| MEN0102-P  | MT-ATP6    | snp | MT         | 8902      | 8902      | G | A |
| MEN0102-P  | NOTCH2     | snp | 1          | 120469147 | 120469147 | T | C |
| MEN0102-P  | CDK20      | snp | 9          | 90584208  | 90584208  | C | T |
| MEN0102-P  | BRCA2      | snp | 13         | 32911929  | 32911929  | A | G |
| MEN0102-P  | NOTCH2NL   | snp | 1          | 145281473 | 145281473 | T | G |
| MEN0103-P  | SGMS1      | snp | 10         | 52103409  | 52103409  | C | T |
| MEN0103-P  | ING3       | snp | 7          | 120604810 | 120604810 | G | C |
| MEN0103-P  | CCDC18     | snp | 1          | 93676420  | 93676420  | C | T |
| MEN0103-P  | ZNF93      | snp | 19         | 20044827  | 20044827  | A | G |
| MEN0103-P  | SETD5      | snp | 3          | 9486866   | 9486866   | G | A |
| MEN0103-P  | TBX5       | snp | 12         | 114832692 | 114832692 | G | T |
| MEN0103-P  | LPCAT1     | snp | 5          | 1501646   | 1501646   | G | A |
| MEN0103-P  | ACCSL      | snp | 11         | 44069708  | 44069708  | C | T |
| MEN0103-P  | AC011841.1 | snp | 3L000205.1 | 117444    | 117444    | G | T |
| MEN0103-P  | PHYHIPL    | snp | 10         | 60936719  | 60936719  | G | C |
| MEN0103-P  | MYH6       | snp | 14         | 23853800  | 23853800  | C | T |
| MEN0103-P  | UACA       | snp | 15         | 70959718  | 70959718  | G | C |
| MEN0103-P  | PNP        | snp | 14         | 20944723  | 20944723  | T | C |
| MEN0103-P  | ECI2       | snp | 6          | 4116219   | 4116219   | T | G |
| MEN0103-P  | PMFBP1     | snp | 16         | 72154019  | 72154019  | T | C |
| MEN0103-P  | TAOK1      | snp | 17         | 27805302  | 27805302  | C | A |
| MEN0103-P  | TAOK1      | snp | 17         | 27805301  | 27805301  | G | T |
| MEN0103-P  | FCHSD2     | snp | 11         | 72549864  | 72549864  | A | G |
| MEN0103-P  | PHAX       | snp | 5          | 125939818 | 125939818 | G | A |
| MEN0103-P  | FAM47C     | snp | X          | 37028425  | 37028425  | A | G |
| MEN0103-P  | CASP10     | snp | 2          | 202050508 | 202050508 | C | G |
| MEN0103-P  | ZNF93      | snp | 19         | 20044827  | 20044827  | A | G |
| MEN0103-P  | PNP        | snp | 14         | 20944723  | 20944723  | T | C |

|           |            |     |            |           |           |   |   |
|-----------|------------|-----|------------|-----------|-----------|---|---|
| MEN0103-P | ACCSL      | snp | 11         | 44069708  | 44069708  | C | T |
| MEN0103-P | LPCAT1     | snp | 5          | 1501646   | 1501646   | G | A |
| MEN0103-P | AC011841.1 | snp | SL000205.1 | 117444    | 117444    | G | T |
| MEN0103-P | CCDC18     | snp | 1          | 93676420  | 93676420  | C | T |
| MEN0103-P | TAOK1      | snp | 17         | 27805301  | 27805301  | G | T |
| MEN0103-P | SGMS1      | snp | 10         | 52103409  | 52103409  | C | T |
| MEN0103-P | ING3       | snp | 7          | 120604810 | 120604810 | G | C |
| MEN0103-P | ECI2       | snp | 6          | 4116219   | 4116219   | T | G |
| MEN0103-P | TBX5       | snp | 12         | 114832692 | 114832692 | G | T |
| MEN0103-P | PHYHIPL    | snp | 10         | 60936719  | 60936719  | G | C |
| MEN0103-P | SETD5      | snp | 3          | 9486866   | 9486866   | G | A |
| MEN0103-P | PMFBP1     | snp | 16         | 72154019  | 72154019  | T | C |
| MEN0103-P | UACA       | snp | 15         | 70959718  | 70959718  | G | C |
| MEN0103-P | PHAX       | snp | 5          | 125939818 | 125939818 | G | A |
| MEN0103-P | MYH6       | snp | 14         | 23853800  | 23853800  | C | T |
| MEN0103-P | FAM47C     | snp | X          | 37028425  | 37028425  | A | G |
| MEN0103-P | FCHSD2     | snp | 11         | 72549864  | 72549864  | A | G |
| MEN0103-P | CASP10     | snp | 2          | 202050508 | 202050508 | C | G |
| MEN0104-P | PLCZ1      | snp | 12         | 18836196  | 18836196  | C | A |
| MEN0104-P | BMP3       | snp | 4          | 81974620  | 81974620  | T | C |
| MEN0104-P | RTTN       | snp | 18         | 67833342  | 67833342  | G | C |
| MEN0104-P | GPR126     | snp | 6          | 142741040 | 142741040 | T | A |
| MEN0104-P | KDR        | snp | 4          | 55972049  | 55972049  | G | A |
| MEN0104-P | GIGYF2     | snp | 2          | 233675964 | 233675964 | G | T |
| MEN0104-P | TAGLN2     | snp | 1          | 159890322 | 159890322 | G | A |
| MEN0104-P | SYNPO      | snp | 5          | 150028001 | 150028001 | C | T |
| MEN0104-P | PDE4DIP    | snp | 1          | 144859983 | 144859983 | G | A |
| MEN0104-P | ACER3      | snp | 11         | 76687335  | 76687335  | A | G |
| MEN0104-P | NRXN3      | snp | 14         | 79433664  | 79433664  | G | T |
| MEN0104-P | GDPD1      | snp | 17         | 57326146  | 57326146  | G | A |
| MEN0104-P | IMPG1      | snp | 6          | 76734934  | 76734934  | C | A |
| MEN0104-P | MED12L     | snp | 3          | 151082880 | 151082880 | G | A |
| MEN0104-P | ORC1       | snp | 1          | 52849153  | 52849153  | G | A |
| MEN0104-P | CLUH       | snp | 17         | 2603739   | 2603739   | C | A |
| MEN0104-P | GRIA4      | snp | 11         | 105795185 | 105795185 | T | A |
| MEN0104-P | KCNH4      | snp | 17         | 40328236  | 40328236  | T | C |
| MEN0104-P | TYRO3      | snp | 15         | 41853375  | 41853375  | C | T |
| MEN0104-P | TTN        | snp | 2          | 179614561 | 179614561 | A | T |
| MEN0104-P | PRDM2      | snp | 1          | 14075965  | 14075965  | C | A |
| MEN0104-P | ACE        | snp | 17         | 61561894  | 61561894  | A | G |
| MEN0104-P | NLRP11     | snp | 19         | 56307519  | 56307519  | G | A |
| MEN0104-P | CIT        | snp | 12         | 120150416 | 120150416 | A | T |
| MEN0104-P | PLEKHN1    | snp | 1          | 906348    | 906348    | C | G |
| MEN0104-P | PRAMEF2    | snp | 1          | 12919972  | 12919972  | G | T |
| MEN0104-P | CHEK2      | snp | 22         | 29091840  | 29091840  | T | C |
| MEN0104-P | PRSS48     | snp | 4          | 152203538 | 152203538 | G | A |
| MEN0104-P | GRAP       | snp | 17         | 18927643  | 18927643  | T | C |

|           |          |     |    |           |           |   |   |
|-----------|----------|-----|----|-----------|-----------|---|---|
| MEN0104-P | EIF4E1B  | snp | 5  | 176070195 | 176070195 | T | C |
| MEN0104-P | RTTN     | snp | 18 | 67833342  | 67833342  | G | C |
| MEN0104-P | KCNH4    | snp | 17 | 40328236  | 40328236  | T | C |
| MEN0104-P | TAGLN2   | snp | 1  | 159890322 | 159890322 | G | A |
| MEN0104-P | NLRP11   | snp | 19 | 56307519  | 56307519  | G | A |
| MEN0104-P | ORC1     | snp | 1  | 52849153  | 52849153  | G | A |
| MEN0104-P | GRIA4    | snp | 11 | 105795185 | 105795185 | T | A |
| MEN0104-P | NRXN3    | snp | 14 | 79433664  | 79433664  | G | T |
| MEN0104-P | CIT      | snp | 12 | 120150416 | 120150416 | A | T |
| MEN0104-P | MED12L   | snp | 3  | 151082880 | 151082880 | G | A |
| MEN0104-P | ACER3    | snp | 11 | 76687335  | 76687335  | A | G |
| MEN0104-P | KDR      | snp | 4  | 55972049  | 55972049  | G | A |
| MEN0104-P | TYRO3    | snp | 15 | 41853375  | 41853375  | C | T |
| MEN0104-P | GRAP     | snp | 17 | 18927643  | 18927643  | T | C |
| MEN0104-P | IMPG1    | snp | 6  | 76734934  | 76734934  | C | A |
| MEN0104-P | GIGYF2   | snp | 2  | 233675964 | 233675964 | G | T |
| MEN0104-P | GDPD1    | snp | 17 | 57326146  | 57326146  | G | A |
| MEN0104-P | PRAMEF2  | snp | 1  | 12919972  | 12919972  | G | T |
| MEN0104-P | GPR126   | snp | 6  | 142741040 | 142741040 | T | A |
| MEN0104-P | CHEK2    | snp | 22 | 29091840  | 29091840  | T | C |
| MEN0104-P | BMP3     | snp | 4  | 81974620  | 81974620  | T | C |
| MEN0104-P | PLCZ1    | snp | 12 | 18836196  | 18836196  | C | A |
| MEN0104-P | PDE4DIP  | snp | 1  | 144859983 | 144859983 | G | A |
| MEN0104-P | ACE      | snp | 17 | 61561894  | 61561894  | A | G |
| MEN0104-P | TTN      | snp | 2  | 179614561 | 179614561 | A | T |
| MEN0104-P | PRSS48   | snp | 4  | 152203538 | 152203538 | G | A |
| MEN0104-P | CLUH     | snp | 17 | 2603739   | 2603739   | C | A |
| MEN0104-P | SYNPO    | snp | 5  | 150028001 | 150028001 | C | T |
| MEN0104-P | PLEKHN1  | snp | 1  | 906348    | 906348    | C | G |
| MEN0104-P | PRDM2    | snp | 1  | 14075965  | 14075965  | C | A |
| MEN0104-P | EIF4E1B  | snp | 5  | 176070195 | 176070195 | T | C |
| MEN0105-P | CACNA1F  | snp | X  | 49068717  | 49068717  | C | T |
| MEN0105-P | OR8D2    | snp | 11 | 124190032 | 124190032 | G | C |
| MEN0105-P | PAF1     | snp | 19 | 39879048  | 39879048  | C | A |
| MEN0105-P | RAD51AP2 | snp | 2  | 17697824  | 17697824  | T | G |
| MEN0105-P | PTPN13   | snp | 4  | 87643406  | 87643406  | A | T |
| MEN0105-P | METTL13  | snp | 1  | 171761249 | 171761249 | G | A |
| MEN0105-P | UBE3C    | snp | 7  | 156974807 | 156974807 | A | T |
| MEN0105-P | POLE     | snp | 12 | 133254220 | 133254220 | G | A |
| MEN0105-P | PCSK7    | snp | 11 | 117094902 | 117094902 | G | A |
| MEN0105-P | ZC4H2    | snp | X  | 64140091  | 64140091  | G | C |
| MEN0105-P | TMCC2    | snp | 1  | 205238703 | 205238703 | C | T |
| MEN0105-P | CUX2     | snp | 12 | 111758019 | 111758019 | G | A |
| MEN0105-P | MYBPH    | snp | 1  | 203141093 | 203141093 | T | C |
| MEN0105-P | NUP214   | snp | 9  | 134021562 | 134021562 | G | A |
| MEN0105-P | POLR2B   | snp | 4  | 57887119  | 57887119  | C | G |
| MEN0105-P | IL1RAPL1 | snp | X  | 29301057  | 29301057  | G | A |



|           |           |     |    |           |           |   |   |
|-----------|-----------|-----|----|-----------|-----------|---|---|
| MEN0105-P | SECISBP2  | snp | 9  | 91940861  | 91940861  | G | C |
| MEN0105-P | CMBL      | snp | 5  | 10290861  | 10290861  | G | T |
| MEN0105-P | RAD51AP2  | snp | 2  | 17697824  | 17697824  | T | G |
| MEN0105-P | TMCC2     | snp | 1  | 205238703 | 205238703 | C | T |
| MEN0105-P | CACNA1F   | snp | X  | 49068717  | 49068717  | C | T |
| MEN0105-P | MYBPH     | snp | 1  | 203141093 | 203141093 | T | C |
| MEN0105-P | CUX2      | snp | 12 | 111758019 | 111758019 | G | A |
| MEN0105-P | PCSK7     | snp | 11 | 117094902 | 117094902 | G | A |
| MEN0105-P | POLE      | snp | 12 | 133254220 | 133254220 | G | A |
| MEN0105-P | NUP214    | snp | 9  | 134021562 | 134021562 | G | A |
| MEN0105-P | PAF1      | snp | 19 | 39879048  | 39879048  | C | A |
| MEN0105-P | OR8D2     | snp | 11 | 124190032 | 124190032 | G | C |
| MEN0105-P | POLR2B    | snp | 4  | 57887119  | 57887119  | C | G |
| MEN0105-P | UBE3C     | snp | 7  | 156974807 | 156974807 | A | T |
| MEN0105-P | PTPN13    | snp | 4  | 87643406  | 87643406  | A | T |
| MEN0105-P | METTL13   | snp | 1  | 171761249 | 171761249 | G | A |
| MEN0105-P | ZC4H2     | snp | X  | 64140091  | 64140091  | G | C |
| MEN0105-P | SECISBP2  | snp | 9  | 91940861  | 91940861  | G | C |
| MEN0105-P | IL1RAPL1  | snp | X  | 29301057  | 29301057  | G | A |
| MEN0105-P | CMBL      | snp | 5  | 10290861  | 10290861  | G | T |
| MEN0106-P | KCNV1     | snp | 8  | 110980814 | 110980814 | C | A |
| MEN0106-P | PRG4      | snp | 1  | 186276481 | 186276481 | T | C |
| MEN0106-P | IGKV1D-16 | snp | 2  | 90139477  | 90139477  | G | A |
| MEN0106-P | HSP90AB1  | snp | 6  | 44220861  | 44220861  | G | A |
| MEN0106-P | MUC17     | snp | 7  | 100684086 | 100684086 | T | C |
| MEN0106-P | C6        | snp | 5  | 41155074  | 41155074  | G | A |
| MEN0106-P | CLCA2     | snp | 1  | 86913234  | 86913234  | T | G |
| MEN0106-P | PRAMEF2   | snp | 1  | 12919840  | 12919840  | T | C |
| MEN0106-P | EPB41L2   | snp | 6  | 131188709 | 131188709 | T | C |
| MEN0106-P | PRAMEF11  | snp | 1  | 12887453  | 12887453  | C | T |
| MEN0106-P | GGTLC2    | snp | 22 | 22989241  | 22989241  | G | A |
| MEN0106-P | FAM83B    | snp | 6  | 54805523  | 54805523  | C | T |
| MEN0106-P | IGF2BP3   | snp | 7  | 23352422  | 23352422  | G | A |
| MEN0106-P | CDC5L     | snp | 6  | 44414384  | 44414384  | A | G |
| MEN0106-P | PRMT8     | snp | 12 | 3649787   | 3649787   | T | C |
| MEN0106-P | ADAD2     | snp | 16 | 84224883  | 84224883  | A | G |
| MEN0106-P | KRTAP5-2  | snp | 11 | 1619378   | 1619378   | G | A |
| MEN0106-P | PRAMEF2   | snp | 1  | 12919840  | 12919840  | T | C |
| MEN0106-P | EPB41L2   | snp | 6  | 131188709 | 131188709 | T | C |
| MEN0106-P | PRAMEF11  | snp | 1  | 12887453  | 12887453  | C | T |
| MEN0106-P | IGF2BP3   | snp | 7  | 23352422  | 23352422  | G | A |
| MEN0106-P | IGKV1D-16 | snp | 2  | 90139477  | 90139477  | G | A |
| MEN0106-P | CDC5L     | snp | 6  | 44414384  | 44414384  | A | G |
| MEN0106-P | GGTLC2    | snp | 22 | 22989241  | 22989241  | G | A |
| MEN0106-P | ADAD2     | snp | 16 | 84224883  | 84224883  | A | G |
| MEN0106-P | HSP90AB1  | snp | 6  | 44220861  | 44220861  | G | A |
| MEN0106-P | KCNV1     | snp | 8  | 110980814 | 110980814 | C | A |

|           |            |     |            |           |           |   |   |
|-----------|------------|-----|------------|-----------|-----------|---|---|
| MEN0106-P | MUC17      | snp | 7          | 100684086 | 100684086 | T | C |
| MEN0106-P | FAM83B     | snp | 6          | 54805523  | 54805523  | C | T |
| MEN0106-P | CLCA2      | snp | 1          | 86913234  | 86913234  | T | G |
| MEN0106-P | C6         | snp | 5          | 41155074  | 41155074  | G | A |
| MEN0106-P | PRMT8      | snp | 12         | 3649787   | 3649787   | T | C |
| MEN0106-P | PRG4       | snp | 1          | 186276481 | 186276481 | T | C |
| MEN0106-P | KRTAP5-2   | snp | 11         | 1619378   | 1619378   | G | A |
| MEN0107-P | AQP7       | snp | 9          | 33385614  | 33385614  | A | T |
| MEN0107-P | DENND4B    | snp | 1          | 153908604 | 153908604 | G | A |
| MEN0107-P | SLCO1C1    | snp | 12         | 20868190  | 20868190  | C | T |
| MEN0107-P | NBPF10     | snp | 1          | 145311916 | 145311916 | A | G |
| MEN0107-P | NACA       | snp | 12         | 57112087  | 57112087  | A | G |
| MEN0107-P | POM121     | snp | 7          | 72398976  | 72398976  | A | G |
| MEN0107-P | DFNA5      | snp | 7          | 24745946  | 24745946  | T | C |
| MEN0107-P | AC109135.1 | snp | 3L000192.1 | 311344    | 311344    | C | T |
| MEN0107-P | PCSK5      | snp | 9          | 78790192  | 78790192  | C | G |
| MEN0107-P | PRAMEF11   | snp | 1          | 12887453  | 12887453  | C | T |
| MEN0107-P | BHLHB9     | snp | X          | 102004492 | 102004492 | C | G |
| MEN0107-P | AL592183.1 | snp | 3L000219.1 | 83216     | 83216     | G | C |
| MEN0107-P | IWS1       | snp | 2          | 128262691 | 128262691 | G | A |
| MEN0107-P | POM121     | snp | 7          | 72398976  | 72398976  | A | G |
| MEN0107-P | DFNA5      | snp | 7          | 24745946  | 24745946  | T | C |
| MEN0107-P | NACA       | snp | 12         | 57112087  | 57112087  | A | G |
| MEN0107-P | DENND4B    | snp | 1          | 153908604 | 153908604 | G | A |
| MEN0107-P | SLCO1C1    | snp | 12         | 20868190  | 20868190  | C | T |
| MEN0107-P | PRAMEF11   | snp | 1          | 12887453  | 12887453  | C | T |
| MEN0107-P | NBPF10     | snp | 1          | 145311916 | 145311916 | A | G |
| MEN0107-P | AC109135.1 | snp | 3L000192.1 | 311344    | 311344    | C | T |
| MEN0107-P | PCSK5      | snp | 9          | 78790192  | 78790192  | C | G |
| MEN0107-P | AQP7       | snp | 9          | 33385614  | 33385614  | A | T |
| MEN0107-P | BHLHB9     | snp | X          | 102004492 | 102004492 | C | G |
| MEN0107-P | IWS1       | snp | 2          | 128262691 | 128262691 | G | A |
| MEN0107-P | AL592183.1 | snp | 3L000219.1 | 83216     | 83216     | G | C |
| MEN0108-P | TMPRSS6    | snp | 22         | 37494473  | 37494473  | C | T |
| MEN0108-P | MMP19      | snp | 12         | 56230872  | 56230872  | C | T |
| MEN0108-P | KMT2C      | snp | 7          | 151970855 | 151970855 | G | C |
| MEN0108-P | OR1L3      | snp | 9          | 125437821 | 125437821 | G | A |
| MEN0108-P | CEACAM8    | snp | 19         | 43097837  | 43097837  | C | T |
| MEN0108-P | PRB4       | snp | 12         | 11461583  | 11461583  | C | G |
| MEN0108-P | EPO        | snp | 7          | 100320626 | 100320626 | C | T |
| MEN0108-P | TTC12      | snp | 11         | 113194101 | 113194101 | A | C |
| MEN0108-P | LUM        | snp | 12         | 91498084  | 91498084  | T | G |
| MEN0108-P | SIRPA      | snp | 20         | 1902301   | 1902301   | G | A |
| MEN0108-P | PRB4       | snp | 12         | 11461589  | 11461589  | A | G |
| MEN0108-P | SSX3       | snp | X          | 48206952  | 48206952  | T | C |
| MEN0108-P | LUM        | snp | 12         | 91498084  | 91498084  | T | G |
| MEN0108-P | OR1L3      | snp | 9          | 125437821 | 125437821 | G | A |

|           |             |     |    |           |           |   |   |
|-----------|-------------|-----|----|-----------|-----------|---|---|
| MEN0108-P | TMPRSS6     | snp | 22 | 37494473  | 37494473  | C | T |
| MEN0108-P | EPO         | snp | 7  | 100320626 | 100320626 | C | T |
| MEN0108-P | KMT2C       | snp | 7  | 151970855 | 151970855 | G | C |
| MEN0108-P | TTC12       | snp | 11 | 113194101 | 113194101 | A | C |
| MEN0108-P | MMP19       | snp | 12 | 56230872  | 56230872  | C | T |
| MEN0108-P | SIRPA       | snp | 20 | 1902301   | 1902301   | G | A |
| MEN0108-P | SSX3        | snp | X  | 48206952  | 48206952  | T | C |
| MEN0108-P | CEACAM8     | snp | 19 | 43097837  | 43097837  | C | T |
| MEN0108-P | PRB4        | snp | 12 | 11461583  | 11461583  | C | G |
| MEN0109-P | KLF4        | snp | 9  | 110249348 | 110249348 | T | G |
| MEN0109-P | TOR1A       | snp | 9  | 132584984 | 132584984 | C | T |
| MEN0109-P | SIN3A       | snp | 15 | 75684817  | 75684817  | C | T |
| MEN0109-P | PRSS33      | snp | 16 | 2834665   | 2834665   | G | T |
| MEN0109-P | HMGCR       | snp | 5  | 74655888  | 74655888  | G | A |
| MEN0109-P | ATP1A4      | snp | 1  | 160137092 | 160137092 | G | A |
| MEN0109-P | IKZF4       | snp | 12 | 56428651  | 56428651  | G | C |
| MEN0109-P | MSH6        | snp | 2  | 48027231  | 48027231  | G | C |
| MEN0109-P | GPR26       | snp | 10 | 125426309 | 125426309 | A | G |
| MEN0109-P | TRAF7       | snp | 16 | 2226146   | 2226146   | A | G |
| MEN0109-P | UBL7        | snp | 15 | 74741604  | 74741604  | G | C |
| MEN0109-P | PRB3        | snp | 12 | 11420584  | 11420584  | C | T |
| MEN0109-P | HLA-B       | snp | 6  | 31324165  | 31324165  | A | G |
| MEN0109-P | EID2        | snp | 19 | 40030163  | 40030163  | C | A |
| MEN0109-P | SLCO1C1     | snp | 12 | 20874978  | 20874978  | C | A |
| MEN0109-P | PLEKHA6     | snp | 1  | 204198175 | 204198175 | G | A |
| MEN0109-P | RBAK-RBAKDN | snp | 7  | 5112706   | 5112706   | G | C |
| MEN0109-P | PKHD1       | snp | 6  | 51524329  | 51524329  | C | A |
| MEN0109-P | SCUBE2      | snp | 11 | 9069616   | 9069616   | G | A |
| MEN0109-P | LIPG        | snp | 18 | 47101933  | 47101933  | G | A |
| MEN0109-P | UBL7        | snp | 15 | 74741604  | 74741604  | G | C |
| MEN0109-P | GPR26       | snp | 10 | 125426309 | 125426309 | A | G |
| MEN0109-P | HMGCR       | snp | 5  | 74655888  | 74655888  | G | A |
| MEN0109-P | TRAF7       | snp | 16 | 2226146   | 2226146   | A | G |
| MEN0109-P | LIPG        | snp | 18 | 47101933  | 47101933  | G | A |
| MEN0109-P | EID2        | snp | 19 | 40030163  | 40030163  | C | A |
| MEN0109-P | PLEKHA6     | snp | 1  | 204198175 | 204198175 | G | A |
| MEN0109-P | SLCO1C1     | snp | 12 | 20874978  | 20874978  | C | A |
| MEN0109-P | PKHD1       | snp | 6  | 51524329  | 51524329  | C | A |
| MEN0109-P | HLA-B       | snp | 6  | 31324165  | 31324165  | A | G |
| MEN0109-P | PRSS33      | snp | 16 | 2834665   | 2834665   | G | T |
| MEN0109-P | SIN3A       | snp | 15 | 75684817  | 75684817  | C | T |
| MEN0109-P | MSH6        | snp | 2  | 48027231  | 48027231  | G | C |
| MEN0109-P | TOR1A       | snp | 9  | 132584984 | 132584984 | C | T |
| MEN0109-P | TOR1A       | snp | 9  | 132584984 | 132584984 | C | T |
| MEN0109-P | ATP1A4      | snp | 1  | 160137092 | 160137092 | G | A |
| MEN0109-P | RBAK-RBAKDN | snp | 7  | 5112706   | 5112706   | G | C |
| MEN0109-P | SCUBE2      | snp | 11 | 9069616   | 9069616   | G | A |

|           |          |     |    |           |           |   |   |
|-----------|----------|-----|----|-----------|-----------|---|---|
| MEN0109-P | IKZF4    | snp | 12 | 56428651  | 56428651  | G | C |
| MEN0109-P | KLF4     | snp | 9  | 110249348 | 110249348 | T | G |
| MEN0109-P | PRB3     | snp | 12 | 11420584  | 11420584  | C | T |
| MEN0110-P | FAM169A  | snp | 5  | 74109692  | 74109692  | A | G |
| MEN0110-P | STAR     | snp | 8  | 38008284  | 38008284  | C | A |
| MEN0110-P | OR10A6   | snp | 11 | 7950136   | 7950136   | C | A |
| MEN0110-P | HIVEP1   | snp | 6  | 12125120  | 12125120  | C | G |
| MEN0110-P | LRFN2    | snp | 6  | 40400530  | 40400530  | T | G |
| MEN0110-P | GLI3     | snp | 7  | 42005786  | 42005786  | T | C |
| MEN0110-P | NDUFB5   | snp | 3  | 179322625 | 179322625 | C | T |
| MEN0110-P | POLR2B   | snp | 4  | 57891598  | 57891598  | C | T |
| MEN0110-P | PCDHGB4  | snp | 5  | 140769259 | 140769259 | C | A |
| MEN0110-P | B3GALT5  | snp | 21 | 41033394  | 41033394  | G | A |
| MEN0110-P | CENPI    | snp | X  | 100382161 | 100382161 | C | T |
| MEN0110-P | FAM222A  | snp | 12 | 110205942 | 110205942 | C | T |
| MEN0110-P | CDKN2A   | snp | 9  | 21974573  | 21974573  | T | C |
| MEN0110-P | LRFN2    | snp | 6  | 40400530  | 40400530  | T | G |
| MEN0110-P | LRFN2    | snp | 6  | 40400530  | 40400530  | T | G |
| MEN0110-P | LRFN2    | snp | 6  | 40400530  | 40400530  | T | G |
| MEN0110-P | LRFN2    | snp | 6  | 40400530  | 40400530  | T | G |
| MEN0110-P | NDUFB5   | snp | 3  | 179322625 | 179322625 | C | T |
| MEN0110-P | PCDHGB4  | snp | 5  | 140769259 | 140769259 | C | A |
| MEN0110-P | FAM222A  | snp | 12 | 110205942 | 110205942 | C | T |
| MEN0110-P | POLR2B   | snp | 4  | 57891598  | 57891598  | C | T |
| MEN0110-P | FAM169A  | snp | 5  | 74109692  | 74109692  | A | G |
| MEN0110-P | STAR     | snp | 8  | 38008284  | 38008284  | C | A |
| MEN0110-P | CDKN2A   | snp | 9  | 21974573  | 21974573  | T | C |
| MEN0110-P | CENPI    | snp | X  | 100382161 | 100382161 | C | T |
| MEN0110-P | OR10A6   | snp | 11 | 7950136   | 7950136   | C | A |
| MEN0110-P | GLI3     | snp | 7  | 42005786  | 42005786  | T | C |
| MEN0110-P | HIVEP1   | snp | 6  | 12125120  | 12125120  | C | G |
| MEN0110-P | B3GALT5  | snp | 21 | 41033394  | 41033394  | G | A |
| MEN0111-P | VANGL1   | snp | 1  | 116206697 | 116206697 | G | A |
| MEN0111-P | OR10Q1   | snp | 11 | 57995474  | 57995474  | G | T |
| MEN0111-P | NF2      | snp | 22 | 30054233  | 30054233  | G | A |
| MEN0111-P | SLC35G6  | snp | 17 | 7386121   | 7386121   | C | T |
| MEN0111-P | CDK5R1   | snp | 17 | 30815311  | 30815311  | G | A |
| MEN0111-P | SOGA2    | snp | 18 | 8793011   | 8793011   | G | A |
| MEN0111-P | SUGP2    | snp | 19 | 19115445  | 19115445  | C | A |
| MEN0111-P | ENAM     | snp | 4  | 71508093  | 71508093  | G | A |
| MEN0111-P | PITPNC1  | snp | 17 | 65688811  | 65688811  | G | A |
| MEN0111-P | IGHV3-30 | snp | 14 | 106791295 | 106791295 | C | A |
| MEN0111-P | AHNAK2   | snp | 14 | 105415786 | 105415786 | G | A |
| MEN0111-P | IFNA2    | snp | 9  | 21384781  | 21384781  | C | T |
| MEN0111-P | AHNAK    | snp | 11 | 62295549  | 62295549  | C | T |
| MEN0111-P | ZNF878   | snp | 19 | 12155673  | 12155673  | A | C |
| MEN0111-P | POLR3C   | snp | 1  | 145608598 | 145608598 | C | T |

|           |           |     |    |           |           |   |   |
|-----------|-----------|-----|----|-----------|-----------|---|---|
| MEN0111-P | MUC17     | snp | 7  | 100682124 | 100682124 | T | A |
| MEN0111-P | PHLDA1    | snp | 12 | 76424708  | 76424708  | A | T |
| MEN0111-P | UBBP4     | snp | 17 | 21731144  | 21731144  | T | G |
| MEN0111-P | CUL4B     | snp | X  | 119693998 | 119693998 | A | G |
| MEN0111-P | ZNF57     | snp | 19 | 2917842   | 2917842   | G | A |
| MEN0111-P | SMG1      | snp | 16 | 18937330  | 18937330  | T | C |
| MEN0111-P | RPTN      | snp | 1  | 152128689 | 152128689 | C | T |
| MEN0111-P | TCHH      | snp | 1  | 152082220 | 152082220 | G | C |
| MEN0111-P | MAPKBP1   | snp | 15 | 42067544  | 42067544  | G | A |
| MEN0111-P | MAPKBP1   | snp | 15 | 42067544  | 42067544  | G | A |
| MEN0111-P | SUGP2     | snp | 19 | 19115445  | 19115445  | C | A |
| MEN0111-P | SLC35G6   | snp | 17 | 7386121   | 7386121   | C | T |
| MEN0111-P | ZNF57     | snp | 19 | 2917842   | 2917842   | G | A |
| MEN0111-P | OR10Q1    | snp | 11 | 57995474  | 57995474  | G | T |
| MEN0111-P | VANGL1    | snp | 1  | 116206697 | 116206697 | G | A |
| MEN0111-P | IFNA2     | snp | 9  | 21384781  | 21384781  | C | T |
| MEN0111-P | UBBP4     | snp | 17 | 21731144  | 21731144  | T | G |
| MEN0111-P | ZNF878    | snp | 19 | 12155673  | 12155673  | A | C |
| MEN0111-P | AHNAK2    | snp | 14 | 105415786 | 105415786 | G | A |
| MEN0111-P | PITPNC1   | snp | 17 | 65688811  | 65688811  | G | A |
| MEN0111-P | NF2       | snp | 22 | 30054233  | 30054233  | G | A |
| MEN0111-P | CDK5R1    | snp | 17 | 30815311  | 30815311  | G | A |
| MEN0111-P | POLR3C    | snp | 1  | 145608598 | 145608598 | C | T |
| MEN0111-P | AHNAK     | snp | 11 | 62295549  | 62295549  | C | T |
| MEN0111-P | IGHV3-30  | snp | 14 | 106791295 | 106791295 | C | A |
| MEN0111-P | PHLDA1    | snp | 12 | 76424708  | 76424708  | A | T |
| MEN0111-P | SOGA2     | snp | 18 | 8793011   | 8793011   | G | A |
| MEN0111-P | CUL4B     | snp | X  | 119693998 | 119693998 | A | G |
| MEN0111-P | MUC17     | snp | 7  | 100682124 | 100682124 | T | A |
| MEN0111-P | ENAM      | snp | 4  | 71508093  | 71508093  | G | A |
| MEN0111-P | TCHH      | snp | 1  | 152082220 | 152082220 | G | C |
| MEN0111-P | SMG1      | snp | 16 | 18937330  | 18937330  | T | C |
| MEN0111-P | RPTN      | snp | 1  | 152128689 | 152128689 | C | T |
| MEN0112-P | ZNF681    | snp | 19 | 23927139  | 23927139  | T | G |
| MEN0112-P | KRTAP19-3 | snp | 21 | 31864074  | 31864074  | G | A |
| MEN0112-P | MYO15A    | snp | 17 | 18023231  | 18023231  | G | A |
| MEN0112-P | SCN5A     | snp | 3  | 38671826  | 38671826  | G | A |
| MEN0112-P | CCDC82    | snp | 11 | 96086844  | 96086844  | G | A |
| MEN0112-P | MASTL     | snp | 10 | 27462084  | 27462084  | G | A |
| MEN0112-P | KRT26     | snp | 17 | 38922856  | 38922856  | G | A |
| MEN0112-P | RNF144A   | snp | 2  | 7170338   | 7170338   | C | T |
| MEN0112-P | REPS2     | snp | X  | 17024441  | 17024441  | C | T |
| MEN0112-P | TPTE2     | snp | 13 | 20056679  | 20056679  | T | G |
| MEN0112-P | DEDD      | snp | 1  | 161092178 | 161092178 | C | T |
| MEN0112-P | ZNF563    | snp | 19 | 12429722  | 12429722  | T | C |
| MEN0112-P | FRG1B     | snp | 20 | 29628243  | 29628243  | T | C |
| MEN0112-P | DOCK11    | snp | X  | 117814641 | 117814641 | G | A |

|           |         |     |    |           |           |   |   |
|-----------|---------|-----|----|-----------|-----------|---|---|
| MEN0112-P | MYO1D   | snp | 17 | 31039073  | 31039073  | C | T |
| MEN0112-P | ZNF714  | snp | 19 | 21300738  | 21300738  | T | C |
| MEN0112-P | LRRTM4  | snp | 2  | 77746912  | 77746912  | G | A |
| MEN0112-P | RBM22   | snp | 5  | 150071393 | 150071393 | G | A |
| MEN0112-P | CNTNAP2 | snp | 7  | 146741075 | 146741075 | G | A |
| MEN0112-P | WDR65   | snp | 1  | 43663300  | 43663300  | G | A |
| MEN0112-P | NBPF3   | snp | 1  | 21806573  | 21806573  | A | G |
| MEN0112-P | TRIP12  | snp | 2  | 230723956 | 230723956 | G | A |
| MEN0112-P | FRAS1   | snp | 4  | 79410104  | 79410104  | G | A |
| MEN0112-P | GPR179  | snp | 17 | 36499269  | 36499269  | C | T |
| MEN0112-P | AKT1    | snp | 14 | 105246551 | 105246551 | C | T |
| MEN0112-P | CDC40   | snp | 6  | 110551173 | 110551173 | G | A |
| MEN0112-P | FRG1B   | snp | 20 | 29628245  | 29628245  | G | A |
| MEN0112-P | DOK1    | snp | 2  | 74783547  | 74783547  | G | A |
| MEN0112-P | TMED6   | snp | 16 | 69385478  | 69385478  | G | C |
| MEN0112-P | NCAPD3  | snp | 11 | 134054813 | 134054813 | G | A |
| MEN0112-P | ANKZF1  | snp | 2  | 220098094 | 220098094 | G | A |
| MEN0112-P | CYP21A2 | snp | 6  | 32007918  | 32007918  | G | A |
| MEN0112-P | TRAF7   | snp | 16 | 2223978   | 2223978   | C | G |
| MEN0112-P | RPTN    | snp | 1  | 152128689 | 152128689 | C | T |
| MEN0112-P | ACRC    | snp | X  | 70823743  | 70823743  | G | A |
| MEN0112-P | FLG2    | snp | 1  | 152325523 | 152325523 | G | C |
| MEN0112-P | TMC6    | snp | 17 | 76118730  | 76118730  | G | A |
| MEN0112-P | RBM15   | snp | 1  | 110884048 | 110884048 | G | A |
| MEN0112-P | TAF3    | snp | 10 | 8006836   | 8006836   | G | A |
| MEN0112-P | AKT1    | snp | 14 | 105246551 | 105246551 | C | T |
| MEN0112-P | REPS2   | snp | X  | 17024441  | 17024441  | C | T |
| MEN0112-P | SCN5A   | snp | 3  | 38671826  | 38671826  | G | A |
| MEN0112-P | FRG1B   | snp | 20 | 29628243  | 29628243  | T | C |
| MEN0112-P | ANKZF1  | snp | 2  | 220098094 | 220098094 | G | A |
| MEN0112-P | TPTE2   | snp | 13 | 20056679  | 20056679  | T | G |
| MEN0112-P | WDR65   | snp | 1  | 43663300  | 43663300  | G | A |
| MEN0112-P | MYO1D   | snp | 17 | 31039073  | 31039073  | C | T |
| MEN0112-P | DEDD    | snp | 1  | 161092178 | 161092178 | C | T |
| MEN0112-P | CYP21A2 | snp | 6  | 32007918  | 32007918  | G | A |
| MEN0112-P | RNF144A | snp | 2  | 7170338   | 7170338   | C | T |
| MEN0112-P | ZNF563  | snp | 19 | 12429722  | 12429722  | T | C |
| MEN0112-P | KRT26   | snp | 17 | 38922856  | 38922856  | G | A |
| MEN0112-P | LRRTM4  | snp | 2  | 77746912  | 77746912  | G | A |
| MEN0112-P | TRIP12  | snp | 2  | 230723956 | 230723956 | G | A |
| MEN0112-P | TRAF7   | snp | 16 | 2223978   | 2223978   | C | G |
| MEN0112-P | ZNF681  | snp | 19 | 23927139  | 23927139  | T | G |
| MEN0112-P | GPR179  | snp | 17 | 36499269  | 36499269  | C | T |
| MEN0112-P | TMC6    | snp | 17 | 76118730  | 76118730  | G | A |
| MEN0112-P | RBM22   | snp | 5  | 150071393 | 150071393 | G | A |
| MEN0112-P | NCAPD3  | snp | 11 | 134054813 | 134054813 | G | A |
| MEN0112-P | CDC40   | snp | 6  | 110551173 | 110551173 | G | A |

|           |              |     |    |           |           |   |   |
|-----------|--------------|-----|----|-----------|-----------|---|---|
| MEN0112-P | DOCK11       | snp | X  | 117814641 | 117814641 | G | A |
| MEN0112-P | KRTAP19-3    | snp | 21 | 31864074  | 31864074  | G | A |
| MEN0112-P | TAF3         | snp | 10 | 8006836   | 8006836   | G | A |
| MEN0112-P | MASTL        | snp | 10 | 27462084  | 27462084  | G | A |
| MEN0112-P | DOK1         | snp | 2  | 74783547  | 74783547  | G | A |
| MEN0112-P | CNTNAP2      | snp | 7  | 146741075 | 146741075 | G | A |
| MEN0112-P | MYO15A       | snp | 17 | 18023231  | 18023231  | G | A |
| MEN0112-P | FLG2         | snp | 1  | 152325523 | 152325523 | G | C |
| MEN0112-P | RP11-343C2.7 | snp | 16 | 69385478  | 69385478  | G | C |
| MEN0112-P | FRAS1        | snp | 4  | 79410104  | 79410104  | G | A |
| MEN0112-P | CCDC82       | snp | 11 | 96086844  | 96086844  | G | A |
| MEN0112-P | ZNF714       | snp | 19 | 21300738  | 21300738  | T | C |
| MEN0112-P | NBPF3        | snp | 1  | 21806573  | 21806573  | A | G |
| MEN0112-P | RPTN         | snp | 1  | 152128689 | 152128689 | C | T |
| MEN0112-P | RBM15        | snp | 1  | 110884048 | 110884048 | G | A |
| MEN0112-P | ACRC         | snp | X  | 70823743  | 70823743  | G | A |
| MEN0113-P | DGKE         | snp | 17 | 54912308  | 54912308  | G | A |
| MEN0113-P | PRPF8        | snp | 17 | 1584844   | 1584844   | G | A |
| MEN0113-P | MAGOH        | snp | 1  | 53692748  | 53692748  | A | G |
| MEN0113-P | GRK5         | snp | 10 | 121214568 | 121214568 | G | A |
| MEN0113-P | OR5M1        | snp | 11 | 56380819  | 56380819  | G | T |
| MEN0113-P | ZNF844       | snp | 19 | 12187275  | 12187275  | G | C |
| MEN0113-P | ARFGEF1      | snp | 8  | 68140356  | 68140356  | G | C |
| MEN0113-P | ZNF253       | snp | 19 | 20002885  | 20002885  | G | A |
| MEN0113-P | EDC4         | snp | 16 | 67911491  | 67911491  | A | G |
| MEN0113-P | ZNF253       | snp | 19 | 20002883  | 20002883  | T | A |
| MEN0113-P | TCHH         | snp | 1  | 152084423 | 152084423 | G | C |
| MEN0113-P | PRDX6        | snp | 1  | 173446601 | 173446601 | G | A |
| MEN0113-P | SMARCA1      | snp | X  | 128657281 | 128657281 | C | A |
| MEN0113-P | PLA2R1       | snp | 2  | 160804026 | 160804026 | T | C |
| MEN0113-P | SREK1        | snp | 5  | 65458302  | 65458302  | C | T |
| MEN0113-P | ACRC         | snp | X  | 70823870  | 70823870  | G | A |
| MEN0113-P | OR5M1        | snp | 11 | 56380819  | 56380819  | G | T |
| MEN0113-P | SMARCA1      | snp | X  | 128657281 | 128657281 | C | A |
| MEN0113-P | PRPF8        | snp | 17 | 1584844   | 1584844   | G | A |
| MEN0113-P | ZNF253       | snp | 19 | 20002883  | 20002883  | T | A |
| MEN0113-P | MAGOH        | snp | 1  | 53692748  | 53692748  | A | G |
| MEN0113-P | ZNF844       | snp | 19 | 12187275  | 12187275  | G | C |
| MEN0113-P | PLA2R1       | snp | 2  | 160804026 | 160804026 | T | C |
| MEN0113-P | SREK1        | snp | 5  | 65458302  | 65458302  | C | T |
| MEN0113-P | ARFGEF1      | snp | 8  | 68140356  | 68140356  | G | C |
| MEN0113-P | EDC4         | snp | 16 | 67911491  | 67911491  | A | G |
| MEN0113-P | DGKE         | snp | 17 | 54912308  | 54912308  | G | A |
| MEN0113-P | PRDX6        | snp | 1  | 173446601 | 173446601 | G | A |
| MEN0113-P | GRK5         | snp | 10 | 121214568 | 121214568 | G | A |
| MEN0113-P | ACRC         | snp | X  | 70823870  | 70823870  | G | A |
| MEN0113-P | TCHH         | snp | 1  | 152084423 | 152084423 | G | C |

|           |         |     |    |           |           |   |   |
|-----------|---------|-----|----|-----------|-----------|---|---|
| MEN0114-P | ZNF878  | snp | 19 | 12155673  | 12155673  | A | C |
| MEN0114-P | SLC26A9 | snp | 1  | 205902078 | 205902078 | G | A |
| MEN0114-P | CYP2D7P | snp | 22 | 42538870  | 42538870  | A | C |
| MEN0114-P | MUC17   | snp | 7  | 100683689 | 100683689 | C | T |
| MEN0114-P | PLD3    | snp | 19 | 40883780  | 40883780  | G | A |
| MEN0114-P | PSG11   | snp | 19 | 43528993  | 43528993  | C | T |
| MEN0114-P | LRIG3   | snp | 12 | 59284514  | 59284514  | A | C |
| MEN0114-P | SRSF8   | snp | 11 | 94801036  | 94801036  | C | G |
| MEN0114-P | CTR9    | snp | 11 | 10791833  | 10791833  | A | C |
| MEN0114-P | GPR3    | snp | 1  | 27721240  | 27721240  | G | A |
| MEN0114-P | DDX27   | snp | 20 | 47852916  | 47852916  | G | A |
| MEN0114-P | SLC12A6 | snp | 15 | 34551102  | 34551102  | C | T |
| MEN0114-P | SON     | snp | 21 | 34923783  | 34923783  | A | G |
| MEN0114-P | ADCY10  | snp | 1  | 167871047 | 167871047 | C | T |
| MEN0114-P | LCA5L   | snp | 21 | 40777986  | 40777986  | T | A |
| MEN0114-P | LRP2    | snp | 2  | 170112684 | 170112684 | C | A |
| MEN0114-P | PTPRH   | snp | 19 | 55711693  | 55711693  | C | A |
| MEN0114-P | PAK3    | snp | X  | 110406794 | 110406794 | A | C |
| MEN0114-P | NLRP1   | snp | 17 | 5462323   | 5462323   | C | T |
| MEN0114-P | NUP205  | snp | 7  | 135282939 | 135282939 | G | A |
| MEN0114-P | DHX38   | snp | 16 | 72132855  | 72132855  | C | T |
| MEN0114-P | LIPN    | snp | 10 | 90521985  | 90521985  | A | G |
| MEN0114-P | TUB     | snp | 11 | 8111174   | 8111174   | G | A |
| MEN0114-P | FOLH1   | snp | 11 | 49208203  | 49208203  | C | A |
| MEN0114-P | ARL4D   | snp | 17 | 41477249  | 41477249  | T | G |
| MEN0114-P | RAB14   | snp | 9  | 123952919 | 123952919 | T | A |
| MEN0114-P | RB1CC1  | snp | 8  | 53586653  | 53586653  | C | T |
| MEN0114-P | ANKRD36 | snp | 2  | 97869931  | 97869931  | A | T |
| MEN0114-P | ZNF814  | snp | 19 | 58385546  | 58385546  | G | T |
| MEN0114-P | RGPD3   | snp | 2  | 107049681 | 107049681 | T | C |
| MEN0114-P | FLG     | snp | 1  | 152280877 | 152280877 | C | A |
| MEN0114-P | CLUH    | snp | 17 | 2600121   | 2600121   | C | T |
| MEN0114-P | ZCCHC4  | snp | 4  | 25315716  | 25315716  | G | A |
| MEN0114-P | NUP205  | snp | 7  | 135282939 | 135282939 | G | A |
| MEN0114-P | LRP2    | snp | 2  | 170112684 | 170112684 | C | A |
| MEN0114-P | LRP2    | snp | 2  | 170112684 | 170112684 | C | A |
| MEN0114-P | CYP2D7P | snp | 22 | 42538870  | 42538870  | A | C |
| MEN0114-P | SLC26A9 | snp | 1  | 205902078 | 205902078 | G | A |
| MEN0114-P | DDX27   | snp | 20 | 47852916  | 47852916  | G | A |
| MEN0114-P | MUC17   | snp | 7  | 100683689 | 100683689 | C | T |
| MEN0114-P | SRSF8   | snp | 11 | 94801036  | 94801036  | C | G |
| MEN0114-P | NLRP1   | snp | 17 | 5462323   | 5462323   | C | T |
| MEN0114-P | FOLH1   | snp | 11 | 49208203  | 49208203  | C | A |
| MEN0114-P | PAK3    | snp | X  | 110406794 | 110406794 | A | C |
| MEN0114-P | ARL4D   | snp | 17 | 41477249  | 41477249  | T | G |
| MEN0114-P | LCA5L   | snp | 21 | 40777986  | 40777986  | T | A |
| MEN0114-P | CTR9    | snp | 11 | 10791833  | 10791833  | A | C |



|           |           |     |    |           |           |   |   |
|-----------|-----------|-----|----|-----------|-----------|---|---|
| MEN0114-P | ADCY10    | snp | 1  | 167871047 | 167871047 | C | T |
| MEN0114-P | SON       | snp | 21 | 34923783  | 34923783  | A | G |
| MEN0114-P | CLUH      | snp | 17 | 2600121   | 2600121   | C | T |
| MEN0114-P | ZNF878    | snp | 19 | 12155673  | 12155673  | A | C |
| MEN0114-P | PTPRH     | snp | 19 | 55711693  | 55711693  | C | A |
| MEN0114-P | ZCCHC4    | snp | 4  | 25315716  | 25315716  | G | A |
| MEN0114-P | SLC12A6   | snp | 15 | 34551102  | 34551102  | C | T |
| MEN0114-P | PSG11     | snp | 19 | 43528993  | 43528993  | C | T |
| MEN0114-P | ZNF814    | snp | 19 | 58385546  | 58385546  | G | T |
| MEN0114-P | RAB14     | snp | 9  | 123952919 | 123952919 | T | A |
| MEN0114-P | LRIG3     | snp | 12 | 59284514  | 59284514  | A | C |
| MEN0114-P | RB1CC1    | snp | 8  | 53586653  | 53586653  | C | T |
| MEN0114-P | PLD3      | snp | 19 | 40883780  | 40883780  | G | A |
| MEN0114-P | GPR3      | snp | 1  | 27721240  | 27721240  | G | A |
| MEN0114-P | RGPD3     | snp | 2  | 107049681 | 107049681 | T | C |
| MEN0114-P | TUB       | snp | 11 | 8111174   | 8111174   | G | A |
| MEN0114-P | LIPN      | snp | 10 | 90521985  | 90521985  | A | G |
| MEN0114-P | FLG       | snp | 1  | 152280877 | 152280877 | C | A |
| MEN0114-P | ANKRD36   | snp | 2  | 97869931  | 97869931  | A | T |
| MEN0114-P | DHX38     | snp | 16 | 72132855  | 72132855  | C | T |
| MEN0115-P | ZAN       | snp | 7  | 100358090 | 100358090 | A | C |
| MEN0115-P | CHEK2     | snp | 22 | 29091840  | 29091840  | T | C |
| MEN0115-P | GOLGA6L18 | snp | 15 | 82934804  | 82934804  | T | A |
| MEN0115-P | MT-CYB    | snp | MT | 15119     | 15119     | G | A |
| MEN0115-P | TSC2      | snp | 16 | 2138570   | 2138570   | C | T |
| MEN0115-P | KMT2D     | snp | 12 | 49427495  | 49427495  | G | C |
| MEN0115-P | FRG1B     | snp | 20 | 29624081  | 29624081  | A | T |
| MEN0115-P | NBEA      | snp | 13 | 36239224  | 36239224  | G | A |
| MEN0115-P | MT-CYB    | snp | MT | 15314     | 15314     | G | A |
| MEN0115-P | PRAMEF11  | snp | 1  | 12885318  | 12885318  | C | T |
| MEN0115-P | NUP155    | snp | 5  | 37349296  | 37349296  | C | T |
| MEN0115-P | POTEC     | snp | 18 | 14537970  | 14537970  | C | T |
| MEN0115-P | SACS      | snp | 13 | 23911063  | 23911063  | C | T |
| MEN0115-P | DMD       | snp | X  | 32509625  | 32509625  | A | C |
| MEN0115-P | MT-CYB    | snp | MT | 15119     | 15119     | G | A |
| MEN0115-P | MT-CYB    | snp | MT | 15314     | 15314     | G | A |
| MEN0115-P | ZAN       | snp | 7  | 100358090 | 100358090 | A | C |
| MEN0115-P | KMT2D     | snp | 12 | 49427495  | 49427495  | G | C |
| MEN0115-P | SACS      | snp | 13 | 23911063  | 23911063  | C | T |
| MEN0115-P | FRG1B     | snp | 20 | 29624081  | 29624081  | A | T |
| MEN0115-P | PRAMEF11  | snp | 1  | 12885318  | 12885318  | C | T |
| MEN0115-P | CHEK2     | snp | 22 | 29091840  | 29091840  | T | C |
| MEN0115-P | DMD       | snp | X  | 32509625  | 32509625  | A | C |
| MEN0115-P | NUP155    | snp | 5  | 37349296  | 37349296  | C | T |
| MEN0115-P | NBEA      | snp | 13 | 36239224  | 36239224  | G | A |
| MEN0115-P | POTEC     | snp | 18 | 14537970  | 14537970  | C | T |
| MEN0115-P | TSC2      | snp | 16 | 2138570   | 2138570   | C | T |

|           |           |     |    |           |           |   |   |
|-----------|-----------|-----|----|-----------|-----------|---|---|
| MEN0115-P | GOLGA6L18 | snp | 15 | 82934804  | 82934804  | T | A |
| MEN0116-P | MT-CO1    | snp | MT | 5992      | 5992      | G | A |
| MEN0116-P | MT-ND5    | snp | MT | 12340     | 12340     | A | T |
| MEN0116-P | PRAMEF11  | snp | 1  | 12887337  | 12887337  | A | G |
| MEN0116-P | PRAMEF11  | snp | 1  | 12887332  | 12887332  | C | A |
| MEN0116-P | SVEP1     | snp | 9  | 113169968 | 113169968 | C | T |
| MEN0116-P | NF2       | snp | 22 | 30054233  | 30054233  | G | A |
| MEN0116-P | FAT1      | snp | 4  | 187518135 | 187518135 | C | A |
| MEN0116-P | MT-CO2    | snp | MT | 7691      | 7691      | T | C |
| MEN0116-P | APOBR     | snp | 16 | 28507245  | 28507245  | A | G |
| MEN0116-P | ARHGFE12  | snp | 11 | 120298916 | 120298916 | C | T |
| MEN0116-P | RANBP2    | snp | 2  | 109384211 | 109384211 | G | A |
| MEN0116-P | PRB4      | snp | 12 | 11461589  | 11461589  | A | G |
| MEN0116-P | FAM155A   | snp | 13 | 108518718 | 108518718 | T | C |
| MEN0116-P | MT-CO2    | snp | MT | 7691      | 7691      | T | C |
| MEN0116-P | MT-CO1    | snp | MT | 5992      | 5992      | G | A |
| MEN0116-P | PRAMEF11  | snp | 1  | 12887332  | 12887332  | C | A |
| MEN0116-P | MT-ND5    | snp | MT | 12340     | 12340     | A | T |
| MEN0116-P | FAT1      | snp | 4  | 187518135 | 187518135 | C | A |
| MEN0116-P | ARHGFE12  | snp | 11 | 120298916 | 120298916 | C | T |
| MEN0116-P | NF2       | snp | 22 | 30054233  | 30054233  | G | A |
| MEN0116-P | APOBR     | snp | 16 | 28507245  | 28507245  | A | G |
| MEN0116-P | SVEP1     | snp | 9  | 113169968 | 113169968 | C | T |
| MEN0116-P | RANBP2    | snp | 2  | 109384211 | 109384211 | G | A |
| MEN0116-P | FAM155A   | snp | 13 | 108518718 | 108518718 | T | C |
| MEN0116-P | PRB4      | snp | 12 | 11461589  | 11461589  | A | G |
| MEN0117-P | TPTE      | snp | 21 | 10952935  | 10952935  | T | C |
| MEN0117-P | POTEC     | snp | 18 | 14543057  | 14543057  | T | G |
| MEN0117-P | RGPD3     | snp | 2  | 107049698 | 107049698 | A | G |
| MEN0117-P | POTEC     | snp | 18 | 14537949  | 14537949  | A | G |
| MEN0117-P | ESRP1     | snp | 8  | 95654206  | 95654206  | T | C |
| MEN0117-P | RGPD3     | snp | 2  | 107049710 | 107049710 | A | C |
| MEN0117-P | ANKAR     | snp | 2  | 190597863 | 190597863 | G | A |
| MEN0117-P | MT-ATP6   | snp | MT | 8932      | 8932      | C | T |
| MEN0117-P | GOLGA6L18 | snp | 15 | 82934804  | 82934804  | T | A |
| MEN0117-P | ARID2     | snp | 12 | 46123850  | 46123850  | C | A |
| MEN0117-P | LRP1B     | snp | 2  | 141739831 | 141739831 | C | A |
| MEN0117-P | CCNB1     | snp | 5  | 68463814  | 68463814  | C | T |
| MEN0117-P | RANBP2    | snp | 2  | 109347314 | 109347314 | C | G |
| MEN0117-P | PREX2     | snp | 8  | 68989671  | 68989671  | G | A |
| MEN0117-P | MEGF8     | snp | 19 | 42857184  | 42857184  | C | T |
| MEN0117-P | ABL1      | snp | 9  | 133760171 | 133760171 | C | G |
| MEN0117-P | PRG4      | snp | 1  | 186276814 | 186276814 | G | A |
| MEN0117-P | HMGB1     | snp | 13 | 31035509  | 31035509  | A | T |
| MEN0117-P | CCNB1     | snp | 5  | 68463814  | 68463814  | C | T |
| MEN0117-P | ABL1      | snp | 9  | 133760171 | 133760171 | C | G |
| MEN0117-P | TPTE      | snp | 21 | 10952935  | 10952935  | T | C |

|            |           |     |    |           |           |   |   |
|------------|-----------|-----|----|-----------|-----------|---|---|
| MEN0117-P  | MEGF8     | snp | 19 | 42857184  | 42857184  | C | T |
| MEN0117-P  | RANBP2    | snp | 2  | 109347314 | 109347314 | C | G |
| MEN0117-P  | ANKAR     | snp | 2  | 190597863 | 190597863 | G | A |
| MEN0117-P  | ARID2     | snp | 12 | 46123850  | 46123850  | C | A |
| MEN0117-P  | MT-ATP6   | snp | MT | 8932      | 8932      | C | T |
| MEN0117-P  | POTEC     | snp | 18 | 14543057  | 14543057  | T | G |
| MEN0117-P  | RGPD3     | snp | 2  | 107049698 | 107049698 | A | G |
| MEN0117-P  | LRP1B     | snp | 2  | 141739831 | 141739831 | C | A |
| MEN0117-P  | PREX2     | snp | 8  | 68989671  | 68989671  | G | A |
| MEN0117-P  | ESRP1     | snp | 8  | 95654206  | 95654206  | T | C |
| MEN0117-P  | POTEC     | snp | 18 | 14537949  | 14537949  | A | G |
| MEN0117-P  | GOLGA6L18 | snp | 15 | 82934804  | 82934804  | T | A |
| MEN0117-P  | PRG4      | snp | 1  | 186276814 | 186276814 | G | A |
| MEN0117-P  | HMGB1     | snp | 13 | 31035509  | 31035509  | A | T |
| MEN0118-PO | MUC7      | snp | 4  | 71347185  | 71347185  | T | C |
| MEN0118-PO | DCLK1     | snp | 13 | 36700147  | 36700147  | C | A |
| MEN0118-PO | CRISPLD1  | snp | 8  | 75932247  | 75932247  | G | T |
| MEN0118-PO | ELTD1     | snp | 1  | 79392671  | 79392671  | T | G |
| MEN0118-PO | DISP1     | snp | 1  | 223176649 | 223176649 | C | T |
| MEN0118-PO | MUC4      | snp | 3  | 195505836 | 195505836 | G | C |
| MEN0118-PO | DMD       | snp | X  | 32456492  | 32456492  | T | A |
| MEN0118-PO | TTN       | snp | 2  | 179659702 | 179659702 | C | A |
| MEN0118-PO | EPAS1     | snp | 2  | 46607399  | 46607399  | G | A |
| MEN0118-PO | CH25H     | snp | 10 | 90966460  | 90966460  | G | A |
| MEN0118-PO | TTN       | snp | 2  | 179532174 | 179532174 | G | A |
| MEN0118-PO | ACBD5     | snp | 10 | 27499994  | 27499994  | G | A |
| MEN0118-PO | NOS3      | snp | 7  | 150704077 | 150704077 | G | A |
| MEN0118-PO | PPL       | snp | 16 | 4934500   | 4934500   | G | A |
| MEN0118-PO | ABCA4     | snp | 1  | 94463499  | 94463499  | G | A |
| MEN0118-PO | AMER2     | snp | 13 | 25744296  | 25744296  | C | A |
| MEN0118-PO | POTEC     | snp | 18 | 14513764  | 14513764  | C | T |
| MEN0118-PO | KCNQ5     | snp | 6  | 73902363  | 73902363  | G | C |
| MEN0118-PO | MPZL2     | snp | 11 | 118133212 | 118133212 | T | G |
| MEN0118-PO | FAM91A1   | snp | 8  | 124797968 | 124797968 | G | A |
| MEN0118-PO | SNRK      | snp | 3  | 43389633  | 43389633  | G | A |
| MEN0118-PO | PTPN3     | snp | 9  | 112168799 | 112168799 | T | A |
| MEN0118-PO | IMPG2     | snp | 3  | 100976379 | 100976379 | T | A |
| MEN0118-PO | PCNT      | snp | 21 | 47852061  | 47852061  | G | A |
| MEN0118-PO | IL5       | snp | 5  | 131877714 | 131877714 | C | T |
| MEN0118-PO | SHCBP1    | snp | 16 | 46651598  | 46651598  | G | A |
| MEN0118-PO | DMD       | snp | X  | 32486629  | 32486629  | G | C |
| MEN0118-PO | UQCRFS1   | snp | 19 | 29698751  | 29698751  | G | A |
| MEN0118-PO | SH2D2A    | snp | 1  | 156777073 | 156777073 | T | G |
| MEN0118-PO | RSPRY1    | snp | 16 | 57255184  | 57255184  | G | A |
| MEN0118-PO | ABCA4     | snp | 1  | 94463499  | 94463499  | G | A |
| MEN0118-PO | DCLK1     | snp | 13 | 36700147  | 36700147  | C | A |
| MEN0118-PO | SHCBP1    | snp | 16 | 46651598  | 46651598  | G | A |

|            |          |     |    |           |           |   |   |
|------------|----------|-----|----|-----------|-----------|---|---|
| MEN0118-P0 | RSPRY1   | snp | 16 | 57255184  | 57255184  | G | A |
| MEN0118-P0 | PTPN3    | snp | 9  | 112168799 | 112168799 | T | A |
| MEN0118-P0 | IMPG2    | snp | 3  | 100976379 | 100976379 | T | A |
| MEN0118-P0 | CH25H    | snp | 10 | 90966460  | 90966460  | G | A |
| MEN0118-P0 | PPL      | snp | 16 | 4934500   | 4934500   | G | A |
| MEN0118-P0 | DMD      | snp | X  | 32486629  | 32486629  | G | C |
| MEN0118-P0 | FAM91A1  | snp | 8  | 124797968 | 124797968 | G | A |
| MEN0118-P0 | DISP1    | snp | 1  | 223176649 | 223176649 | C | T |
| MEN0118-P0 | IL5      | snp | 5  | 131877714 | 131877714 | C | T |
| MEN0118-P0 | TTN      | snp | 2  | 179659702 | 179659702 | C | A |
| MEN0118-P0 | ELTD1    | snp | 1  | 79392671  | 79392671  | T | G |
| MEN0118-P0 | KCNQ5    | snp | 6  | 73902363  | 73902363  | G | C |
| MEN0118-P0 | AMER2    | snp | 13 | 25744296  | 25744296  | C | A |
| MEN0118-P0 | ACBD5    | snp | 10 | 27499994  | 27499994  | G | A |
| MEN0118-P0 | DMD      | snp | X  | 32456492  | 32456492  | T | A |
| MEN0118-P0 | CRISPLD1 | snp | 8  | 75932247  | 75932247  | G | T |
| MEN0118-P0 | UQCRFS1  | snp | 19 | 29698751  | 29698751  | G | A |
| MEN0118-P0 | SNRK     | snp | 3  | 43389633  | 43389633  | G | A |
| MEN0118-P0 | TTN      | snp | 2  | 179532174 | 179532174 | G | A |
| MEN0118-P0 | SH2D2A   | snp | 1  | 156777073 | 156777073 | T | G |
| MEN0118-P0 | NOS3     | snp | 7  | 150704077 | 150704077 | G | A |
| MEN0118-P0 | EPAS1    | snp | 2  | 46607399  | 46607399  | G | A |
| MEN0118-P0 | PCNT     | snp | 21 | 47852061  | 47852061  | G | A |
| MEN0118-P0 | MUC4     | snp | 3  | 195505836 | 195505836 | G | C |
| MEN0118-P0 | MPZL2    | snp | 11 | 118133212 | 118133212 | T | G |
| MEN0118-P0 | POTEC    | snp | 18 | 14513764  | 14513764  | C | T |
| MEN0118-P0 | MUC7     | snp | 4  | 71347185  | 71347185  | T | C |
| MEN0118-P1 | C1orf95  | snp | 1  | 226789707 | 226789707 | G | T |
| MEN0118-P1 | TSPAN18  | snp | 11 | 44928010  | 44928010  | G | T |
| MEN0118-P1 | MUC17    | snp | 7  | 100683801 | 100683801 | G | A |
| MEN0118-P1 | CRISPLD1 | snp | 8  | 75932247  | 75932247  | G | T |
| MEN0118-P1 | ELTD1    | snp | 1  | 79392671  | 79392671  | T | G |
| MEN0118-P1 | DMD      | snp | X  | 32456492  | 32456492  | T | A |
| MEN0118-P1 | TTN      | snp | 2  | 179659702 | 179659702 | C | A |
| MEN0118-P1 | USP42    | snp | 7  | 6175546   | 6175546   | G | A |
| MEN0118-P1 | EPAS1    | snp | 2  | 46607399  | 46607399  | G | A |
| MEN0118-P1 | CHEK2    | snp | 22 | 29091840  | 29091840  | T | C |
| MEN0118-P1 | TOM1L1   | snp | 17 | 52993164  | 52993164  | G | A |
| MEN0118-P1 | CHRND    | snp | 2  | 233396266 | 233396266 | G | A |
| MEN0118-P1 | TTN      | snp | 2  | 179532174 | 179532174 | G | A |
| MEN0118-P1 | C6orf25  | snp | 6  | 31692375  | 31692375  | C | T |
| MEN0118-P1 | QRICH2   | snp | 17 | 74289520  | 74289520  | G | A |
| MEN0118-P1 | RPAP3    | snp | 12 | 48091499  | 48091499  | G | A |
| MEN0118-P1 | ABCA4    | snp | 1  | 94463499  | 94463499  | G | A |
| MEN0118-P1 | AMER2    | snp | 13 | 25744296  | 25744296  | C | A |
| MEN0118-P1 | NOL6     | snp | 9  | 33467193  | 33467193  | C | T |
| MEN0118-P1 | REL      | snp | 2  | 61118941  | 61118941  | G | A |

|            |          |     |    |           |           |   |   |
|------------|----------|-----|----|-----------|-----------|---|---|
| MEN0118-P1 | POTEC    | snp | 18 | 14513764  | 14513764  | C | T |
| MEN0118-P1 | ICA1     | snp | 7  | 8258024   | 8258024   | T | A |
| MEN0118-P1 | FAM91A1  | snp | 8  | 124797968 | 124797968 | G | A |
| MEN0118-P1 | PEG3     | snp | 19 | 57328801  | 57328801  | G | A |
| MEN0118-P1 | SNRK     | snp | 3  | 43389633  | 43389633  | G | A |
| MEN0118-P1 | PTPN3    | snp | 9  | 112168799 | 112168799 | T | A |
| MEN0118-P1 | DNAJB1   | snp | 19 | 14626895  | 14626895  | G | A |
| MEN0118-P1 | KLHL42   | snp | 12 | 27950726  | 27950726  | G | A |
| MEN0118-P1 | PAMR1    | snp | 11 | 35456101  | 35456101  | G | A |
| MEN0118-P1 | LHCGR    | snp | 2  | 48914996  | 48914996  | C | T |
| MEN0118-P1 | PIP5K1C  | snp | 19 | 3642936   | 3642936   | G | A |
| MEN0118-P1 | MMP14    | snp | 14 | 23310742  | 23310742  | C | T |
| MEN0118-P1 | DMD      | snp | X  | 32486629  | 32486629  | G | C |
| MEN0118-P1 | ZNF208   | snp | 19 | 22154342  | 22154342  | A | C |
| MEN0118-P1 | RSPRY1   | snp | 16 | 57255184  | 57255184  | G | A |
| MEN0118-P1 | ZNF814   | snp | 19 | 58385546  | 58385546  | G | T |
| MEN0118-P1 | CNGA1    | snp | 4  | 47938974  | 47938974  | C | T |
| MEN0118-P1 | GRHL1    | snp | 2  | 10104056  | 10104056  | G | A |
| MEN0118-P1 | ABCA4    | snp | 1  | 94463499  | 94463499  | G | A |
| MEN0118-P1 | TOM1L1   | snp | 17 | 52993164  | 52993164  | G | A |
| MEN0118-P1 | C1orf95  | snp | 1  | 226789707 | 226789707 | G | T |
| MEN0118-P1 | C6orf25  | snp | 6  | 31692375  | 31692375  | C | T |
| MEN0118-P1 | RSPRY1   | snp | 16 | 57255184  | 57255184  | G | A |
| MEN0118-P1 | CNGA1    | snp | 4  | 47938974  | 47938974  | C | T |
| MEN0118-P1 | PTPN3    | snp | 9  | 112168799 | 112168799 | T | A |
| MEN0118-P1 | USP42    | snp | 7  | 6175546   | 6175546   | G | A |
| MEN0118-P1 | CHEK2    | snp | 22 | 29091840  | 29091840  | T | C |
| MEN0118-P1 | DMD      | snp | X  | 32486629  | 32486629  | G | C |
| MEN0118-P1 | TSPAN18  | snp | 11 | 44928010  | 44928010  | G | T |
| MEN0118-P1 | FAM91A1  | snp | 8  | 124797968 | 124797968 | G | A |
| MEN0118-P1 | GRHL1    | snp | 2  | 10104056  | 10104056  | G | A |
| MEN0118-P1 | TTN      | snp | 2  | 179659702 | 179659702 | C | A |
| MEN0118-P1 | ELTD1    | snp | 1  | 79392671  | 79392671  | T | G |
| MEN0118-P1 | CHRND    | snp | 2  | 233396266 | 233396266 | G | A |
| MEN0118-P1 | ICA1     | snp | 7  | 8258024   | 8258024   | T | A |
| MEN0118-P1 | KLHL42   | snp | 12 | 27950726  | 27950726  | G | A |
| MEN0118-P1 | AMER2    | snp | 13 | 25744296  | 25744296  | C | A |
| MEN0118-P1 | DMD      | snp | X  | 32456492  | 32456492  | T | A |
| MEN0118-P1 | CRISPLD1 | snp | 8  | 75932247  | 75932247  | G | T |
| MEN0118-P1 | NOL6     | snp | 9  | 33467193  | 33467193  | C | T |
| MEN0118-P1 | PAMR1    | snp | 11 | 35456101  | 35456101  | G | A |
| MEN0118-P1 | LHCGR    | snp | 2  | 48914996  | 48914996  | C | T |
| MEN0118-P1 | SNRK     | snp | 3  | 43389633  | 43389633  | G | A |
| MEN0118-P1 | TTN      | snp | 2  | 179532174 | 179532174 | G | A |
| MEN0118-P1 | DNAJB1   | snp | 19 | 14626895  | 14626895  | G | A |
| MEN0118-P1 | MMP14    | snp | 14 | 23310742  | 23310742  | C | T |
| MEN0118-P1 | QRICH2   | snp | 17 | 74289520  | 74289520  | G | A |

|            |          |     |    |           |           |   |   |
|------------|----------|-----|----|-----------|-----------|---|---|
| MEN0118-P1 | ZNF814   | snp | 19 | 58385546  | 58385546  | G | T |
| MEN0118-P1 | REL      | snp | 2  | 61118941  | 61118941  | G | A |
| MEN0118-P1 | ZNF208   | snp | 19 | 22154342  | 22154342  | A | C |
| MEN0118-P1 | RPAP3    | snp | 12 | 48091499  | 48091499  | G | A |
| MEN0118-P1 | EPAS1    | snp | 2  | 46607399  | 46607399  | G | A |
| MEN0118-P1 | PIP5K1C  | snp | 19 | 3642936   | 3642936   | G | A |
| MEN0118-P1 | PEG3     | snp | 19 | 57328801  | 57328801  | G | A |
| MEN0118-P1 | POTEC    | snp | 18 | 14513764  | 14513764  | C | T |
| MEN0118-P1 | MUC17    | snp | 7  | 100683801 | 100683801 | G | A |
| MEN0119-P0 | ZDHHC14  | snp | 6  | 157963631 | 157963631 | C | T |
| MEN0119-P0 | NCAPG    | snp | 4  | 17844978  | 17844978  | G | A |
| MEN0119-P0 | NBPF3    | snp | 1  | 21806564  | 21806564  | A | C |
| MEN0119-P0 | SLC6A6   | snp | 3  | 14489143  | 14489143  | G | A |
| MEN0119-P0 | MUC17    | snp | 7  | 100682094 | 100682094 | C | T |
| MEN0119-P0 | ZNF681   | snp | 19 | 23926839  | 23926839  | A | G |
| MEN0119-P0 | ZNF93    | snp | 19 | 20045361  | 20045361  | A | G |
| MEN0119-P0 | ZNF747   | snp | 16 | 30545892  | 30545892  | C | A |
| MEN0119-P0 | CNTRL    | snp | 9  | 123860776 | 123860776 | G | A |
| MEN0119-P0 | NPIP5    | snp | 16 | 22545865  | 22545865  | G | C |
| MEN0119-P0 | ZNF737   | snp | 19 | 20728254  | 20728254  | C | G |
| MEN0119-P0 | ARHGAP31 | snp | 3  | 119134679 | 119134679 | G | C |
| MEN0119-P0 | MYH7B    | snp | 20 | 33581993  | 33581993  | C | T |
| MEN0119-P0 | ZNF493   | snp | 19 | 21606614  | 21606614  | G | A |
| MEN0119-P0 | CSRNP1   | snp | 3  | 39186567  | 39186567  | G | A |
| MEN0119-P0 | INTS6    | snp | 13 | 52026580  | 52026580  | C | T |
| MEN0119-P0 | NOL8     | snp | 9  | 95077417  | 95077417  | C | A |
| MEN0119-P0 | ZAN      | snp | 7  | 100350474 | 100350474 | T | C |
| MEN0119-P0 | ZNF208   | snp | 19 | 22156766  | 22156766  | G | A |
| MEN0119-P0 | RPTN     | snp | 1  | 152128485 | 152128485 | C | T |
| MEN0119-P0 | NBPF14   | snp | 1  | 148012533 | 148012533 | T | G |
| MEN0119-P0 | NPC1     | snp | 18 | 21125070  | 21125070  | T | C |
| MEN0119-P0 | TRIM42   | snp | 3  | 140401786 | 140401786 | A | C |
| MEN0119-P0 | CPT1B    | snp | 22 | 51009914  | 51009914  | C | T |
| MEN0119-P0 | S100B    | snp | 21 | 48022235  | 48022235  | C | T |
| MEN0119-P0 | EPS8     | snp | 12 | 15811507  | 15811507  | G | A |
| MEN0119-P0 | NXF1     | snp | 11 | 62571391  | 62571391  | G | A |
| MEN0119-P0 | C2       | snp | 6  | 31911969  | 31911969  | G | A |
| MEN0119-P0 | MUC4     | snp | 3  | 195505836 | 195505836 | G | C |
| MEN0119-P0 | RPTN     | snp | 1  | 152128464 | 152128464 | T | C |
| MEN0119-P0 | GLI1     | snp | 12 | 57860065  | 57860065  | G | A |
| MEN0119-P0 | RPTN     | snp | 1  | 152128689 | 152128689 | C | T |
| MEN0119-P0 | FBXL3    | snp | 13 | 77592829  | 77592829  | G | A |
| MEN0119-P0 | CCDC82   | snp | 11 | 96098268  | 96098268  | G | C |
| MEN0119-P0 | KRTAP1-5 | snp | 17 | 39183145  | 39183145  | A | G |
| MEN0119-P0 | ZNF141   | snp | 4  | 367058    | 367058    | G | A |
| MEN0119-P0 | MUC17    | snp | 7  | 100684301 | 100684301 | A | C |
| MEN0119-P0 | ZCWPW1   | snp | 7  | 99998657  | 99998657  | C | T |

|            |           |     |    |           |           |   |   |
|------------|-----------|-----|----|-----------|-----------|---|---|
| MEN0119-P0 | HIST1H1B  | snp | 6  | 27835139  | 27835139  | G | A |
| MEN0119-P0 | PCLO      | snp | 7  | 82784468  | 82784468  | C | T |
| MEN0119-P0 | KRTAP21-2 | snp | 21 | 32119350  | 32119350  | A | C |
| MEN0119-P0 | HTT       | snp | 4  | 3129152   | 3129152   | A | G |
| MEN0119-P0 | ZNF208    | snp | 19 | 22154342  | 22154342  | A | C |
| MEN0119-P0 | MUC17     | snp | 7  | 100681940 | 100681940 | A | G |
| MEN0119-P0 | CGREF1    | snp | 2  | 27324405  | 27324405  | T | C |
| MEN0119-P0 | CGREF1    | snp | 2  | 27324405  | 27324405  | T | C |
| MEN0119-P0 | ZNF141    | snp | 4  | 367058    | 367058    | G | A |
| MEN0119-P0 | ZNF208    | snp | 19 | 22156766  | 22156766  | G | A |
| MEN0119-P0 | ZNF493    | snp | 19 | 21606614  | 21606614  | G | A |
| MEN0119-P0 | SLC6A6    | snp | 3  | 14489143  | 14489143  | G | A |
| MEN0119-P0 | ZNF737    | snp | 19 | 20728254  | 20728254  | C | G |
| MEN0119-P0 | HIST1H1B  | snp | 6  | 27835139  | 27835139  | G | A |
| MEN0119-P0 | NCAPG     | snp | 4  | 17844978  | 17844978  | G | A |
| MEN0119-P0 | ZDHHC14   | snp | 6  | 157963631 | 157963631 | C | T |
| MEN0119-P0 | MYH7B     | snp | 20 | 33581993  | 33581993  | C | T |
| MEN0119-P0 | ZNF93     | snp | 19 | 20045361  | 20045361  | A | G |
| MEN0119-P0 | INTS6     | snp | 13 | 52026580  | 52026580  | C | T |
| MEN0119-P0 | ARHGAP31  | snp | 3  | 119134679 | 119134679 | G | C |
| MEN0119-P0 | EPS8      | snp | 12 | 15811507  | 15811507  | G | A |
| MEN0119-P0 | NPC1      | snp | 18 | 21125070  | 21125070  | T | C |
| MEN0119-P0 | S100B     | snp | 21 | 48022235  | 48022235  | C | T |
| MEN0119-P0 | C2        | snp | 6  | 31911969  | 31911969  | G | A |
| MEN0119-P0 | CSRNP1    | snp | 3  | 39186567  | 39186567  | G | A |
| MEN0119-P0 | CNTRL     | snp | 9  | 123860776 | 123860776 | G | A |
| MEN0119-P0 | ZNF208    | snp | 19 | 22154342  | 22154342  | A | C |
| MEN0119-P0 | ZNF681    | snp | 19 | 23926839  | 23926839  | A | G |
| MEN0119-P0 | MUC17     | snp | 7  | 100682094 | 100682094 | C | T |
| MEN0119-P0 | ZNF747    | snp | 16 | 30545892  | 30545892  | C | A |
| MEN0119-P0 | CPT1B     | snp | 22 | 51009914  | 51009914  | C | T |
| MEN0119-P0 | MUC17     | snp | 7  | 100681940 | 100681940 | A | G |
| MEN0119-P0 | TRIM42    | snp | 3  | 140401786 | 140401786 | A | C |
| MEN0119-P0 | CCDC82    | snp | 11 | 96098268  | 96098268  | G | C |
| MEN0119-P0 | NOL8      | snp | 9  | 95077417  | 95077417  | C | A |
| MEN0119-P0 | FBXL3     | snp | 13 | 77592829  | 77592829  | G | A |
| MEN0119-P0 | MUC4      | snp | 3  | 195505836 | 195505836 | G | C |
| MEN0119-P0 | NBPF14    | snp | 1  | 148012533 | 148012533 | T | G |
| MEN0119-P0 | MUC17     | snp | 7  | 100684301 | 100684301 | A | C |
| MEN0119-P0 | HTT       | snp | 4  | 3129152   | 3129152   | A | G |
| MEN0119-P0 | NBPF3     | snp | 1  | 21806564  | 21806564  | A | C |
| MEN0119-P0 | GLI1      | snp | 12 | 57860065  | 57860065  | G | A |
| MEN0119-P0 | CGREF1    | snp | 2  | 27324405  | 27324405  | T | C |
| MEN0119-P0 | NXF1      | snp | 11 | 62571391  | 62571391  | G | A |
| MEN0119-P0 | ZCWPW1    | snp | 7  | 99998657  | 99998657  | C | T |
| MEN0119-P0 | NP1PB5    | snp | 16 | 22545865  | 22545865  | G | C |
| MEN0119-P0 | KRTAP21-2 | snp | 21 | 32119350  | 32119350  | A | C |

|            |          |     |    |           |           |   |   |
|------------|----------|-----|----|-----------|-----------|---|---|
| MEN0119-P0 | RPTN     | snp | 1  | 152128689 | 152128689 | C | T |
| MEN0119-P0 | RPTN     | snp | 1  | 152128485 | 152128485 | C | T |
| MEN0119-P0 | KRTAP1-5 | snp | 17 | 39183145  | 39183145  | A | G |
| MEN0119-P0 | RPTN     | snp | 1  | 152128464 | 152128464 | T | C |
| MEN0119-P0 | ZAN      | snp | 7  | 100350474 | 100350474 | T | C |
| MEN0119-P0 | PCLO     | snp | 7  | 82784468  | 82784468  | C | T |
| MEN0119-P1 | TMEM175  | snp | 4  | 944278    | 944278    | G | A |
| MEN0119-P1 | GJB6     | snp | 13 | 20797397  | 20797397  | G | A |
| MEN0119-P1 | NCAPG    | snp | 4  | 17844978  | 17844978  | G | A |
| MEN0119-P1 | EEF1B2   | snp | 2  | 207025366 | 207025366 | G | A |
| MEN0119-P1 | OR56A3   | snp | 11 | 5969053   | 5969053   | G | A |
| MEN0119-P1 | PDIA2    | snp | 16 | 336685    | 336685    | G | A |
| MEN0119-P1 | MYH4     | snp | 17 | 10360874  | 10360874  | C | T |
| MEN0119-P1 | DCAF10   | snp | 9  | 37861204  | 37861204  | G | T |
| MEN0119-P1 | FRG1B    | snp | 20 | 29628245  | 29628245  | G | A |
| MEN0119-P1 | KCNH8    | snp | 3  | 19575323  | 19575323  | C | T |
| MEN0119-P1 | NPIPB5   | snp | 16 | 22545865  | 22545865  | G | C |
| MEN0119-P1 | PCSK5    | snp | 9  | 78773999  | 78773999  | C | T |
| MEN0119-P1 | ARHGAP31 | snp | 3  | 119134679 | 119134679 | G | C |
| MEN0119-P1 | CDHR5    | snp | 11 | 619539    | 619539    | G | A |
| MEN0119-P1 | LCTL     | snp | 15 | 66844071  | 66844071  | G | A |
| MEN0119-P1 | CTTNBP2  | snp | 7  | 117400674 | 117400674 | C | G |
| MEN0119-P1 | NOL8     | snp | 9  | 95077417  | 95077417  | C | A |
| MEN0119-P1 | ZNF208   | snp | 19 | 22156766  | 22156766  | G | A |
| MEN0119-P1 | ADAMTS9  | snp | 3  | 64635369  | 64635369  | C | T |
| MEN0119-P1 | CDK7     | snp | 5  | 68551329  | 68551329  | T | C |
| MEN0119-P1 | ACSM2B   | snp | 16 | 20554485  | 20554485  | G | A |
| MEN0119-P1 | TLN2     | snp | 15 | 62944301  | 62944301  | G | C |
| MEN0119-P1 | TSPAN9   | snp | 12 | 3387629   | 3387629   | G | A |
| MEN0119-P1 | NPC1     | snp | 18 | 21125070  | 21125070  | T | C |
| MEN0119-P1 | TRIM42   | snp | 3  | 140401786 | 140401786 | A | C |
| MEN0119-P1 | SETD1A   | snp | 16 | 30992415  | 30992415  | C | T |
| MEN0119-P1 | POLR1B   | snp | 2  | 113330181 | 113330181 | G | A |
| MEN0119-P1 | ACE2     | snp | X  | 15609901  | 15609901  | C | T |
| MEN0119-P1 | LAMA3    | snp | 18 | 21511155  | 21511155  | G | A |
| MEN0119-P1 | EEF1B2   | snp | 2  | 207025358 | 207025358 | A | G |
| MEN0119-P1 | ZNF836   | snp | 19 | 52659243  | 52659243  | A | C |
| MEN0119-P1 | ZNF780B  | snp | 19 | 40541567  | 40541567  | C | T |
| MEN0119-P1 | DFNB31   | snp | 9  | 117228555 | 117228555 | C | T |
| MEN0119-P1 | TAF1L    | snp | 9  | 32631725  | 32631725  | C | T |
| MEN0119-P1 | RPTN     | snp | 1  | 152128689 | 152128689 | C | T |
| MEN0119-P1 | MUC4     | snp | 3  | 195511076 | 195511076 | T | A |
| MEN0119-P1 | SIRPA    | snp | 20 | 1902301   | 1902301   | G | A |
| MEN0119-P1 | FBXL3    | snp | 13 | 77592829  | 77592829  | G | A |
| MEN0119-P1 | CCP110   | snp | 16 | 19548834  | 19548834  | C | A |
| MEN0119-P1 | AHNAK    | snp | 11 | 62296070  | 62296070  | A | G |
| MEN0119-P1 | AARS     | snp | 16 | 70303618  | 70303618  | C | T |



|            |          |     |    |           |           |   |   |
|------------|----------|-----|----|-----------|-----------|---|---|
| MEN0119-P1 | HTT      | snp | 4  | 3129152   | 3129152   | A | G |
| MEN0119-P1 | ZNF208   | snp | 19 | 22156766  | 22156766  | G | A |
| MEN0119-P1 | SETD1A   | snp | 16 | 30992415  | 30992415  | C | T |
| MEN0119-P1 | NCAPG    | snp | 4  | 17844978  | 17844978  | G | A |
| MEN0119-P1 | TMEM175  | snp | 4  | 944278    | 944278    | G | A |
| MEN0119-P1 | CDHR5    | snp | 11 | 619539    | 619539    | G | A |
| MEN0119-P1 | PCSK5    | snp | 9  | 78773999  | 78773999  | C | T |
| MEN0119-P1 | KCNH8    | snp | 3  | 19575323  | 19575323  | C | T |
| MEN0119-P1 | LAMA3    | snp | 18 | 21511155  | 21511155  | G | A |
| MEN0119-P1 | CTTNBP2  | snp | 7  | 117400674 | 117400674 | C | G |
| MEN0119-P1 | OR56A3   | snp | 11 | 5969053   | 5969053   | G | A |
| MEN0119-P1 | ARHGAP31 | snp | 3  | 119134679 | 119134679 | G | C |
| MEN0119-P1 | NPC1     | snp | 18 | 21125070  | 21125070  | T | C |
| MEN0119-P1 | EEF1B2   | snp | 2  | 207025366 | 207025366 | G | A |
| MEN0119-P1 | FRG1B    | snp | 20 | 29628245  | 29628245  | G | A |
| MEN0119-P1 | POLR1B   | snp | 2  | 113330181 | 113330181 | G | A |
| MEN0119-P1 | GJB6     | snp | 13 | 20797397  | 20797397  | G | A |
| MEN0119-P1 | AARS     | snp | 16 | 70303618  | 70303618  | C | T |
| MEN0119-P1 | LCTL     | snp | 15 | 66844071  | 66844071  | G | A |
| MEN0119-P1 | PDIA2    | snp | 16 | 336685    | 336685    | G | A |
| MEN0119-P1 | SIRPA    | snp | 20 | 1902301   | 1902301   | G | A |
| MEN0119-P1 | EEF1B2   | snp | 2  | 207025358 | 207025358 | A | G |
| MEN0119-P1 | TSPAN9   | snp | 12 | 3387629   | 3387629   | G | A |
| MEN0119-P1 | TLN2     | snp | 15 | 62944301  | 62944301  | G | C |
| MEN0119-P1 | TAF1L    | snp | 9  | 32631725  | 32631725  | C | T |
| MEN0119-P1 | ZNF780B  | snp | 19 | 40541567  | 40541567  | C | T |
| MEN0119-P1 | TRIM42   | snp | 3  | 140401786 | 140401786 | A | C |
| MEN0119-P1 | ZNF836   | snp | 19 | 52659243  | 52659243  | A | C |
| MEN0119-P1 | NOL8     | snp | 9  | 95077417  | 95077417  | C | A |
| MEN0119-P1 | MYH4     | snp | 17 | 10360874  | 10360874  | C | T |
| MEN0119-P1 | FBXL3    | snp | 13 | 77592829  | 77592829  | G | A |
| MEN0119-P1 | DCAF10   | snp | 9  | 37861204  | 37861204  | G | T |
| MEN0119-P1 | CDK7     | snp | 5  | 68551329  | 68551329  | T | C |
| MEN0119-P1 | AHNAK    | snp | 11 | 62296070  | 62296070  | A | G |
| MEN0119-P1 | ADAMTS9  | snp | 3  | 64635369  | 64635369  | C | T |
| MEN0119-P1 | ACSM2B   | snp | 16 | 20554485  | 20554485  | G | A |
| MEN0119-P1 | HTT      | snp | 4  | 3129152   | 3129152   | A | G |
| MEN0119-P1 | CCP110   | snp | 16 | 19548834  | 19548834  | C | A |
| MEN0119-P1 | ACE2     | snp | X  | 15609901  | 15609901  | C | T |
| MEN0119-P1 | MUC4     | snp | 3  | 195511076 | 195511076 | T | A |
| MEN0119-P1 | DFNB31   | snp | 9  | 117228555 | 117228555 | C | T |
| MEN0119-P1 | NPIPB5   | snp | 16 | 22545865  | 22545865  | G | C |
| MEN0119-P1 | RPTN     | snp | 1  | 152128689 | 152128689 | C | T |
| MEN0120-P  | VPS13A   | snp | 9  | 79890997  | 79890997  | A | G |
| MEN0120-P  | DEFB134  | snp | 8  | 11853720  | 11853720  | C | A |
| MEN0120-P  | PRAMEF11 | snp | 1  | 12887480  | 12887480  | C | T |
| MEN0120-P  | STX16    | snp | 20 | 57242559  | 57242559  | G | A |

|           |            |     |            |           |           |   |   |
|-----------|------------|-----|------------|-----------|-----------|---|---|
| MEN0120-P | ADAMTS7    | snp | 15         | 79059041  | 79059041  | T | C |
| MEN0120-P | CHML       | snp | 1          | 241797957 | 241797957 | C | A |
| MEN0120-P | ATXN7L2    | snp | 1          | 110032989 | 110032989 | C | T |
| MEN0120-P | DDX55      | snp | 12         | 124099851 | 124099851 | G | A |
| MEN0120-P | AC109135.1 | snp | GL000192.1 | 311344    | 311344    | C | T |
| MEN0120-P | NPHP3      | snp | 3          | 132407603 | 132407603 | G | C |
| MEN0120-P | PRAMEF11   | snp | 1          | 12887612  | 12887612  | T | C |
| MEN0120-P | GABBR1     | snp | 6          | 29588897  | 29588897  | G | A |
| MEN0120-P | OR4P4      | snp | 11         | 55406689  | 55406689  | A | G |
| MEN0120-P | SIGLEC8    | snp | 19         | 51961502  | 51961502  | C | A |
| MEN0120-P | FAT3       | snp | 11         | 92565096  | 92565096  | G | T |
| MEN0120-P | LIN7A      | snp | 12         | 81283094  | 81283094  | G | T |
| MEN0120-P | PRAMEF2    | snp | 1          | 12919840  | 12919840  | T | C |
| MEN0120-P | SELM       | snp | 22         | 31503410  | 31503410  | G | A |
| MEN0120-P | DNAJB12    | snp | 10         | 74104883  | 74104883  | G | T |
| MEN0120-P | POTEH      | snp | 22         | 16287770  | 16287770  | C | T |
| MEN0120-P | SFPQ       | snp | 1          | 35656367  | 35656367  | A | G |
| MEN0120-P | GRIN2B     | snp | 12         | 13716759  | 13716759  | C | T |
| MEN0120-P | CHSY3      | snp | 5          | 129521313 | 129521313 | A | T |
| MEN0120-P | BTNL3      | snp | 5          | 180431747 | 180431747 | G | A |
| MEN0120-P | PLCG2      | snp | 16         | 81929442  | 81929442  | C | T |
| MEN0120-P | NR1H4      | snp | 12         | 100904876 | 100904876 | G | A |
| MEN0120-P | NBPF10     | snp | 1          | 145327548 | 145327548 | A | G |
| MEN0120-P | IL1RN      | snp | 2          | 113885296 | 113885296 | C | T |
| MEN0120-P | MT-ND4     | snp | MT         | 11316     | 11316     | T | C |
| MEN0120-P | DENND2A    | snp | 7          | 140221673 | 140221673 | G | A |
| MEN0120-P | IYD        | snp | 6          | 150715311 | 150715311 | G | A |
| MEN0120-P | MDK        | snp | 11         | 46404331  | 46404331  | C | G |
| MEN0120-P | MUC21      | snp | 6          | 30954806  | 30954806  | T | C |
| MEN0120-P | HCFC1      | snp | X          | 153219888 | 153219888 | G | A |
| MEN0120-P | PRMT8      | snp | 12         | 3649787   | 3649787   | T | C |
| MEN0120-P | OR2G6      | snp | 1          | 248685648 | 248685648 | G | A |
| MEN0120-P | ATRX       | snp | X          | 76854964  | 76854964  | A | T |
| MEN0120-P | SELM       | snp | 22         | 31503410  | 31503410  | G | A |
| MEN0120-P | MDK        | snp | 11         | 46404331  | 46404331  | C | G |
| MEN0120-P | MUC21      | snp | 6          | 30954806  | 30954806  | T | C |
| MEN0120-P | ATXN7L2    | snp | 1          | 110032989 | 110032989 | C | T |
| MEN0120-P | STX16      | snp | 20         | 57242559  | 57242559  | G | A |
| MEN0120-P | DDX55      | snp | 12         | 124099851 | 124099851 | G | A |
| MEN0120-P | HCFC1      | snp | X          | 153219888 | 153219888 | G | A |
| MEN0120-P | GABBR1     | snp | 6          | 29588897  | 29588897  | G | A |
| MEN0120-P | GABBR1     | snp | 6          | 29588897  | 29588897  | G | A |
| MEN0120-P | SFPQ       | snp | 1          | 35656367  | 35656367  | A | G |
| MEN0120-P | DEFB134    | snp | 8          | 11853720  | 11853720  | C | A |
| MEN0120-P | CHSY3      | snp | 5          | 129521313 | 129521313 | A | T |
| MEN0120-P | PRAMEF2    | snp | 1          | 12919840  | 12919840  | T | C |
| MEN0120-P | OR4P4      | snp | 11         | 55406689  | 55406689  | A | G |

|            |            |     |            |           |           |   |   |
|------------|------------|-----|------------|-----------|-----------|---|---|
| MEN0120-P  | PRAMEF11   | snp | 1          | 12887612  | 12887612  | T | C |
| MEN0120-P  | OR2G6      | snp | 1          | 248685648 | 248685648 | G | A |
| MEN0120-P  | ADAMTS7    | snp | 15         | 79059041  | 79059041  | T | C |
| MEN0120-P  | PRAMEF11   | snp | 1          | 12887480  | 12887480  | C | T |
| MEN0120-P  | FAT3       | snp | 11         | 92565096  | 92565096  | G | T |
| MEN0120-P  | DENND2A    | snp | 7          | 140221673 | 140221673 | G | A |
| MEN0120-P  | IL1RN      | snp | 2          | 113885296 | 113885296 | C | T |
| MEN0120-P  | AC109135.1 | snp | 5L000192.1 | 311344    | 311344    | C | T |
| MEN0120-P  | PRMT8      | snp | 12         | 3649787   | 3649787   | T | C |
| MEN0120-P  | MT-ND4     | snp | MT         | 11316     | 11316     | T | C |
| MEN0120-P  | CHML       | snp | 1          | 241797957 | 241797957 | C | A |
| MEN0120-P  | IYD        | snp | 6          | 150715311 | 150715311 | G | A |
| MEN0120-P  | ATRX       | snp | X          | 76854964  | 76854964  | A | T |
| MEN0120-P  | LIN7A      | snp | 12         | 81283094  | 81283094  | G | T |
| MEN0120-P  | VPS13A     | snp | 9          | 79890997  | 79890997  | A | G |
| MEN0120-P  | GRIN2B     | snp | 12         | 13716759  | 13716759  | C | T |
| MEN0120-P  | NR1H4      | snp | 12         | 100904876 | 100904876 | G | A |
| MEN0120-P  | DNAJB12    | snp | 10         | 74104883  | 74104883  | G | T |
| MEN0120-P  | BTNL3      | snp | 5          | 180431747 | 180431747 | G | A |
| MEN0120-P  | PLCG2      | snp | 16         | 81929442  | 81929442  | C | T |
| MEN0120-P  | SIGLEC8    | snp | 19         | 51961502  | 51961502  | C | A |
| MEN0120-P  | NBPF10     | snp | 1          | 145327548 | 145327548 | A | G |
| MEN0120-P  | NPHP3      | snp | 3          | 132407603 | 132407603 | G | C |
| MEN0120-P  | POTEH      | snp | 22         | 16287770  | 16287770  | C | T |
| MEN0120-P1 | VPS13A     | snp | 9          | 79890997  | 79890997  | A | G |
| MEN0120-P1 | MT-CYB     | snp | MT         | 15200     | 15200     | G | A |
| MEN0120-P1 | PIM1       | snp | 6          | 37140772  | 37140772  | G | A |
| MEN0120-P1 | UNC13C     | snp | 15         | 54817829  | 54817829  | G | T |
| MEN0120-P1 | MT-CO2     | snp | MT         | 8019      | 8019      | C | T |
| MEN0120-P1 | CHML       | snp | 1          | 241797957 | 241797957 | C | A |
| MEN0120-P1 | XPO5       | snp | 6          | 43517248  | 43517248  | C | T |
| MEN0120-P1 | LIPA       | snp | 10         | 90974676  | 90974676  | G | A |
| MEN0120-P1 | ATXN7L2    | snp | 1          | 110032989 | 110032989 | C | T |
| MEN0120-P1 | OR6K6      | snp | 1          | 158725115 | 158725115 | C | G |
| MEN0120-P1 | NPHP3      | snp | 3          | 132407603 | 132407603 | G | C |
| MEN0120-P1 | SSTR1      | snp | 14         | 38679007  | 38679007  | C | T |
| MEN0120-P1 | ARFGEF1    | snp | 8          | 68130340  | 68130340  | C | T |
| MEN0120-P1 | FAT3       | snp | 11         | 92565096  | 92565096  | G | T |
| MEN0120-P1 | CHPF       | snp | 2          | 220405109 | 220405109 | G | A |
| MEN0120-P1 | ZNF547     | snp | 19         | 57888802  | 57888802  | G | A |
| MEN0120-P1 | RRP12      | snp | 10         | 99140635  | 99140635  | G | A |
| MEN0120-P1 | DNAJB12    | snp | 10         | 74104883  | 74104883  | G | T |
| MEN0120-P1 | GGT7       | snp | 20         | 33440271  | 33440271  | C | A |
| MEN0120-P1 | TEX37      | snp | 2          | 88828886  | 88828886  | T | C |
| MEN0120-P1 | PRICKLE2   | snp | 3          | 64132745  | 64132745  | G | A |
| MEN0120-P1 | GRIN2B     | snp | 12         | 13716759  | 13716759  | C | T |
| MEN0120-P1 | ANKRD36C   | snp | 2          | 96593000  | 96593000  | A | G |

|            |           |     |    |           |           |   |   |
|------------|-----------|-----|----|-----------|-----------|---|---|
| MEN0120-P1 | CHSY3     | snp | 5  | 129521313 | 129521313 | A | T |
| MEN0120-P1 | BTNL3     | snp | 5  | 180431747 | 180431747 | G | A |
| MEN0120-P1 | PLCG2     | snp | 16 | 81929442  | 81929442  | C | T |
| MEN0120-P1 | IL1RN     | snp | 2  | 113885296 | 113885296 | C | T |
| MEN0120-P1 | TJP3      | snp | 19 | 3750145   | 3750145   | C | T |
| MEN0120-P1 | RIN3      | snp | 14 | 93118173  | 93118173  | G | A |
| MEN0120-P1 | MT-ND4    | snp | MT | 11316     | 11316     | T | C |
| MEN0120-P1 | DENND2A   | snp | 7  | 140221673 | 140221673 | G | A |
| MEN0120-P1 | COL15A1   | snp | 9  | 101824554 | 101824554 | G | A |
| MEN0120-P1 | MYLK      | snp | 3  | 123419230 | 123419230 | C | T |
| MEN0120-P1 | GGT7      | snp | 20 | 33440271  | 33440271  | C | A |
| MEN0120-P1 | ATXN7L2   | snp | 1  | 110032989 | 110032989 | C | T |
| MEN0120-P1 | MT-CYB    | snp | MT | 15200     | 15200     | G | A |
| MEN0120-P1 | RRP12     | snp | 10 | 99140635  | 99140635  | G | A |
| MEN0120-P1 | MT-CO2    | snp | MT | 8019      | 8019      | C | T |
| MEN0120-P1 | CHSY3     | snp | 5  | 129521313 | 129521313 | A | T |
| MEN0120-P1 | TJP3      | snp | 19 | 3750145   | 3750145   | C | T |
| MEN0120-P1 | XPO5      | snp | 6  | 43517248  | 43517248  | C | T |
| MEN0120-P1 | UNC13C    | snp | 15 | 54817829  | 54817829  | G | T |
| MEN0120-P1 | SSTR1     | snp | 14 | 38679007  | 38679007  | C | T |
| MEN0120-P1 | LIPA      | snp | 10 | 90974676  | 90974676  | G | A |
| MEN0120-P1 | FAT3      | snp | 11 | 92565096  | 92565096  | G | T |
| MEN0120-P1 | DENND2A   | snp | 7  | 140221673 | 140221673 | G | A |
| MEN0120-P1 | ZNF547    | snp | 19 | 57888802  | 57888802  | G | A |
| MEN0120-P1 | IL1RN     | snp | 2  | 113885296 | 113885296 | C | T |
| MEN0120-P1 | MT-ND4    | snp | MT | 11316     | 11316     | T | C |
| MEN0120-P1 | PRICKLE2  | snp | 3  | 64132745  | 64132745  | G | A |
| MEN0120-P1 | COL15A1   | snp | 9  | 101824554 | 101824554 | G | A |
| MEN0120-P1 | CHML      | snp | 1  | 241797957 | 241797957 | C | A |
| MEN0120-P1 | PIM1      | snp | 6  | 37140772  | 37140772  | G | A |
| MEN0120-P1 | PIM1      | snp | 6  | 37140772  | 37140772  | G | A |
| MEN0120-P1 | TEX37     | snp | 2  | 88828886  | 88828886  | T | C |
| MEN0120-P1 | VPS13A    | snp | 9  | 79890997  | 79890997  | A | G |
| MEN0120-P1 | MYLK      | snp | 3  | 123419230 | 123419230 | C | T |
| MEN0120-P1 | GRIN2B    | snp | 12 | 13716759  | 13716759  | C | T |
| MEN0120-P1 | DNAJB12   | snp | 10 | 74104883  | 74104883  | G | T |
| MEN0120-P1 | BTNL3     | snp | 5  | 180431747 | 180431747 | G | A |
| MEN0120-P1 | OR6K6     | snp | 1  | 158725115 | 158725115 | C | G |
| MEN0120-P1 | PLCG2     | snp | 16 | 81929442  | 81929442  | C | T |
| MEN0120-P1 | RIN3      | snp | 14 | 93118173  | 93118173  | G | A |
| MEN0120-P1 | ARFGEF1   | snp | 8  | 68130340  | 68130340  | C | T |
| MEN0120-P1 | ANKRD36C  | snp | 2  | 96593000  | 96593000  | A | G |
| MEN0120-P1 | NPHP3     | snp | 3  | 132407603 | 132407603 | G | C |
| MEN0120-P1 | CHPF      | snp | 2  | 220405109 | 220405109 | G | A |
| MEN0121-P1 | ADCYAP1R1 | snp | 7  | 31126128  | 31126128  | A | G |
| MEN0121-P1 | DDT       | snp | 22 | 24313793  | 24313793  | G | A |
| MEN0121-P1 | TMEM165   | snp | 4  | 56262405  | 56262405  | C | T |

|            |              |     |    |           |           |   |   |
|------------|--------------|-----|----|-----------|-----------|---|---|
| MEN0121-P1 | NPIPA5       | snp | 16 | 15457770  | 15457770  | A | C |
| MEN0121-P1 | JUN          | snp | 1  | 59248709  | 59248709  | C | T |
| MEN0121-P1 | ZNF563       | snp | 19 | 12429722  | 12429722  | T | C |
| MEN0121-P1 | NBPF14       | snp | 1  | 148012529 | 148012529 | T | C |
| MEN0121-P1 | MMP13        | snp | 11 | 102815867 | 102815867 | A | G |
| MEN0121-P1 | ZNF91        | snp | 19 | 23544783  | 23544783  | C | T |
| MEN0121-P1 | DDT          | snp | 22 | 24313792  | 24313792  | G | A |
| MEN0121-P1 | USP17L2      | snp | 8  | 11995276  | 11995276  | C | T |
| MEN0121-P1 | NBPF3        | snp | 1  | 21806573  | 21806573  | A | G |
| MEN0121-P1 | METTL10      | snp | 10 | 126450989 | 126450989 | G | A |
| MEN0121-P1 | IKBKB        | snp | 8  | 42173736  | 42173736  | C | T |
| MEN0121-P1 | MYH14        | snp | 19 | 50713828  | 50713828  | C | T |
| MEN0121-P1 | IL17RD       | snp | 3  | 57132491  | 57132491  | C | T |
| MEN0121-P1 | ZNF878       | snp | 19 | 12155757  | 12155757  | C | A |
| MEN0121-P1 | APOB         | snp | 2  | 21247929  | 21247929  | G | A |
| MEN0121-P1 | RP11-166B2.1 | snp | 16 | 12027558  | 12027558  | T | C |
| MEN0121-P1 | BPIFB3       | snp | 20 | 31656748  | 31656748  | G | A |
| MEN0121-P1 | ZNF626       | snp | 19 | 20807601  | 20807601  | C | A |
| MEN0121-P1 | ARMC7        | snp | 17 | 73124919  | 73124919  | C | T |
| MEN0121-P1 | GOLGA8S      | snp | 15 | 23605381  | 23605381  | C | G |
| MEN0121-P1 | NBPF1        | snp | 1  | 16892277  | 16892277  | G | A |
| MEN0121-P1 | DMD          | snp | X  | 32827654  | 32827654  | A | T |
| MEN0121-P1 | DSCAM        | snp | 21 | 41550989  | 41550989  | C | T |
| MEN0121-P1 | ZNF708       | snp | 19 | 21476625  | 21476625  | A | T |
| MEN0121-P1 | MTRNR2L8     | snp | 11 | 10529739  | 10529739  | G | A |
| MEN0121-P1 | RP11-166B2.1 | snp | 16 | 12027521  | 12027521  | G | C |
| MEN0121-P1 | NBEAL2       | snp | 3  | 47037938  | 47037938  | C | G |
| MEN0121-P1 | POU5F1B      | snp | 8  | 128428443 | 128428443 | C | T |
| MEN0121-P1 | SLAIN1       | snp | 13 | 78320909  | 78320909  | C | A |
| MEN0121-P1 | NBPF10       | snp | 1  | 145323695 | 145323695 | C | T |
| MEN0121-P1 | FRY          | snp | 13 | 32783812  | 32783812  | T | G |
| MEN0121-P1 | ZNF431       | snp | 19 | 21366366  | 21366366  | G | A |
| MEN0121-P1 | ZNF678       | snp | 1  | 227843257 | 227843257 | A | G |
| MEN0121-P1 | VCL          | snp | 10 | 75865010  | 75865010  | A | G |
| MEN0121-P1 | ZNF721       | snp | 4  | 435565    | 435565    | G | T |
| MEN0121-P1 | ZNF729       | snp | 19 | 22497191  | 22497191  | T | A |
| MEN0121-P1 | KIAA1324L    | snp | 7  | 86542320  | 86542320  | G | T |
| MEN0121-P1 | CAPZA3       | snp | 12 | 18891878  | 18891878  | G | T |
| MEN0121-P1 | ZNF728       | snp | 19 | 23159304  | 23159304  | C | T |
| MEN0121-P1 | ZNF141       | snp | 4  | 367245    | 367245    | C | A |
| MEN0121-P1 | FSTL5        | snp | 4  | 162459446 | 162459446 | C | A |
| MEN0121-P1 | ZNF429       | snp | 19 | 21719781  | 21719781  | A | G |
| MEN0121-P1 | ZNF728       | snp | 19 | 23159288  | 23159288  | T | C |
| MEN0121-P1 | ARPP21       | snp | 3  | 35763297  | 35763297  | C | T |
| MEN0121-P1 | ZNF254       | snp | 19 | 24310154  | 24310154  | A | C |
| MEN0121-P1 | TICAM1       | snp | 19 | 4817402   | 4817402   | C | T |
| MEN0121-P1 | ZNF91        | snp | 19 | 23542561  | 23542561  | T | C |

|            |              |     |    |           |           |   |   |
|------------|--------------|-----|----|-----------|-----------|---|---|
| MEN0121-P1 | WDR65        | snp | 1  | 43675591  | 43675591  | A | G |
| MEN0121-P1 | RAB21        | snp | 12 | 72179430  | 72179430  | G | A |
| MEN0121-P1 | ZNF208       | snp | 19 | 22154249  | 22154249  | A | G |
| MEN0121-P1 | ZNF431       | snp | 19 | 21366365  | 21366365  | T | G |
| MEN0121-P1 | ZNF208       | snp | 19 | 22156362  | 22156362  | C | T |
| MEN0121-P1 | ZNF724P      | snp | 19 | 23405270  | 23405270  | T | C |
| MEN0121-P1 | NCOA4        | snp | 10 | 51573319  | 51573319  | G | A |
| MEN0121-P1 | ZNF257       | snp | 19 | 22271309  | 22271309  | A | G |
| MEN0121-P1 | ZNF729       | snp | 19 | 22497504  | 22497504  | A | G |
| MEN0121-P1 | ZNF208       | snp | 19 | 22156983  | 22156983  | T | A |
| MEN0121-P1 | ZNF90        | snp | 19 | 20229964  | 20229964  | C | A |
| MEN0121-P1 | KIAA1324L    | snp | 7  | 86542320  | 86542320  | G | T |
| MEN0121-P1 | ARMC7        | snp | 17 | 73124919  | 73124919  | C | T |
| MEN0121-P1 | DDT          | snp | 22 | 24313792  | 24313792  | G | A |
| MEN0121-P1 | FRY          | snp | 13 | 32783812  | 32783812  | T | G |
| MEN0121-P1 | IL17RD       | snp | 3  | 57132491  | 57132491  | C | T |
| MEN0121-P1 | RP11-166B2.1 | snp | 16 | 12027521  | 12027521  | G | C |
| MEN0121-P1 | ZNF729       | snp | 19 | 22497191  | 22497191  | T | A |
| MEN0121-P1 | TMEM165      | snp | 4  | 56262405  | 56262405  | C | T |
| MEN0121-P1 | CAPZA3       | snp | 12 | 18891878  | 18891878  | G | T |
| MEN0121-P1 | ZNF721       | snp | 4  | 435565    | 435565    | G | T |
| MEN0121-P1 | APOB         | snp | 2  | 21247929  | 21247929  | G | A |
| MEN0121-P1 | ZNF626       | snp | 19 | 20807601  | 20807601  | C | A |
| MEN0121-P1 | ZNF729       | snp | 19 | 22497504  | 22497504  | A | G |
| MEN0121-P1 | WDR65        | snp | 1  | 43675591  | 43675591  | A | G |
| MEN0121-P1 | ZNF254       | snp | 19 | 24310154  | 24310154  | A | C |
| MEN0121-P1 | METTL10      | snp | 10 | 126450989 | 126450989 | G | A |
| MEN0121-P1 | NBEAL2       | snp | 3  | 47037938  | 47037938  | C | G |
| MEN0121-P1 | MTRNR2L8     | snp | 11 | 10529739  | 10529739  | G | A |
| MEN0121-P1 | ZNF563       | snp | 19 | 12429722  | 12429722  | T | C |
| MEN0121-P1 | FSTL5        | snp | 4  | 162459446 | 162459446 | C | A |
| MEN0121-P1 | ZNF708       | snp | 19 | 21476625  | 21476625  | A | T |
| MEN0121-P1 | MMP13        | snp | 11 | 102815867 | 102815867 | A | G |
| MEN0121-P1 | ZNF90        | snp | 19 | 20229964  | 20229964  | C | A |
| MEN0121-P1 | ARPP21       | snp | 3  | 35763297  | 35763297  | C | T |
| MEN0121-P1 | ZNF91        | snp | 19 | 23544783  | 23544783  | C | T |
| MEN0121-P1 | IKBKB        | snp | 8  | 42173736  | 42173736  | C | T |
| MEN0121-P1 | NBPF14       | snp | 1  | 148012529 | 148012529 | T | C |
| MEN0121-P1 | GOLGA8S      | snp | 15 | 23605381  | 23605381  | C | G |
| MEN0121-P1 | ZNF208       | snp | 19 | 22154249  | 22154249  | A | G |
| MEN0121-P1 | ZNF429       | snp | 19 | 21719781  | 21719781  | A | G |
| MEN0121-P1 | TICAM1       | snp | 19 | 4817402   | 4817402   | C | T |
| MEN0121-P1 | NPIPA5       | snp | 16 | 15457770  | 15457770  | A | C |
| MEN0121-P1 | BPIFB3       | snp | 20 | 31656748  | 31656748  | G | A |
| MEN0121-P1 | RP11-166B2.1 | snp | 16 | 12027558  | 12027558  | T | C |
| MEN0121-P1 | USP17L2      | snp | 8  | 11995276  | 11995276  | C | T |
| MEN0121-P1 | ZNF431       | snp | 19 | 21366365  | 21366365  | T | G |

|            |           |     |    |           |           |   |   |
|------------|-----------|-----|----|-----------|-----------|---|---|
| MEN0121-P1 | JUN       | snp | 1  | 59248709  | 59248709  | C | T |
| MEN0121-P1 | MYH14     | snp | 19 | 50713828  | 50713828  | C | T |
| MEN0121-P1 | ZNF678    | snp | 1  | 227843257 | 227843257 | A | G |
| MEN0121-P1 | DMD       | snp | X  | 32827654  | 32827654  | A | T |
| MEN0121-P1 | MTRNR2L2  | snp | 5  | 79945871  | 79945871  | G | A |
| MEN0121-P1 | ZNF208    | snp | 19 | 22156983  | 22156983  | T | A |
| MEN0121-P1 | ZNF878    | snp | 19 | 12155757  | 12155757  | C | A |
| MEN0121-P1 | ADCYAP1R1 | snp | 7  | 31126128  | 31126128  | A | G |
| MEN0121-P1 | VCL       | snp | 10 | 75865010  | 75865010  | A | G |
| MEN0121-P1 | POU5F1B   | snp | 8  | 128428443 | 128428443 | C | T |
| MEN0121-P1 | ZNF257    | snp | 19 | 22271309  | 22271309  | A | G |
| MEN0121-P1 | ZNF91     | snp | 19 | 23542561  | 23542561  | T | C |
| MEN0121-P1 | ZNF728    | snp | 19 | 23159288  | 23159288  | T | C |
| MEN0121-P1 | DSCAM     | snp | 21 | 41550989  | 41550989  | C | T |
| MEN0121-P1 | ZNF728    | snp | 19 | 23159304  | 23159304  | C | T |
| MEN0121-P1 | NBPF1     | snp | 1  | 16892277  | 16892277  | G | A |
| MEN0121-P1 | ZNF724P   | snp | 19 | 23405270  | 23405270  | T | C |
| MEN0121-P1 | ZNF141    | snp | 4  | 367245    | 367245    | C | A |
| MEN0121-P1 | MTRNR2L1  | snp | 17 | 22023422  | 22023422  | C | T |
| MEN0121-P1 | SLAIN1    | snp | 13 | 78320909  | 78320909  | C | A |
| MEN0121-P1 | NBPF10    | snp | 1  | 145323695 | 145323695 | C | T |
| MEN0121-P1 | NCOA4     | snp | 10 | 51573319  | 51573319  | G | A |
| MEN0121-P1 | NBPF3     | snp | 1  | 21806573  | 21806573  | A | G |
| MEN0121-P1 | RAB21     | snp | 12 | 72179430  | 72179430  | G | A |
| MEN0121-P1 | ZNF208    | snp | 19 | 22156362  | 22156362  | C | T |
| MEN0121-P2 | ZNF208    | snp | 19 | 22155896  | 22155896  | A | C |
| MEN0121-P2 | FAT1      | snp | 4  | 187540099 | 187540099 | C | A |
| MEN0121-P2 | ADCYAP1R1 | snp | 7  | 31126128  | 31126128  | A | G |
| MEN0121-P2 | TMEM165   | snp | 4  | 56262405  | 56262405  | C | T |
| MEN0121-P2 | JUN       | snp | 1  | 59248709  | 59248709  | C | T |
| MEN0121-P2 | NBPF3     | snp | 1  | 21806573  | 21806573  | A | G |
| MEN0121-P2 | IKBKB     | snp | 8  | 42173736  | 42173736  | C | T |
| MEN0121-P2 | AOC1      | snp | 7  | 150554087 | 150554087 | T | A |
| MEN0121-P2 | IL17RD    | snp | 3  | 57132491  | 57132491  | C | T |
| MEN0121-P2 | APOB      | snp | 2  | 21247929  | 21247929  | G | A |
| MEN0121-P2 | GRM5      | snp | 11 | 88780856  | 88780856  | T | A |
| MEN0121-P2 | ZNF844    | snp | 19 | 12187275  | 12187275  | G | C |
| MEN0121-P2 | ARMC7     | snp | 17 | 73124919  | 73124919  | C | T |
| MEN0121-P2 | NBPF3     | snp | 1  | 21806606  | 21806606  | T | G |
| MEN0121-P2 | PDE4DIP   | snp | 1  | 144994680 | 144994680 | C | G |
| MEN0121-P2 | NBPF1     | snp | 1  | 16892277  | 16892277  | G | A |
| MEN0121-P2 | DSCAM     | snp | 21 | 41550989  | 41550989  | C | T |
| MEN0121-P2 | POU5F1B   | snp | 8  | 128428443 | 128428443 | C | T |
| MEN0121-P2 | EPPIN     | snp | 20 | 44171423  | 44171423  | A | G |
| MEN0121-P2 | SLAIN1    | snp | 13 | 78320909  | 78320909  | C | A |
| MEN0121-P2 | KMT2C     | snp | 7  | 151932922 | 151932922 | C | T |
| MEN0121-P2 | FRY       | snp | 13 | 32783812  | 32783812  | T | G |

|            |           |     |    |           |           |   |   |
|------------|-----------|-----|----|-----------|-----------|---|---|
| MEN0121-P2 | ZNF724P   | snp | 19 | 23405522  | 23405522  | T | C |
| MEN0121-P2 | VCL       | snp | 10 | 75865010  | 75865010  | A | G |
| MEN0121-P2 | ZNF208    | snp | 19 | 22156590  | 22156590  | C | T |
| MEN0121-P2 | ZNF93     | snp | 19 | 20044524  | 20044524  | A | G |
| MEN0121-P2 | TYW1      | snp | 7  | 66548448  | 66548448  | C | T |
| MEN0121-P2 | POLR1C    | snp | 6  | 43497019  | 43497019  | A | G |
| MEN0121-P2 | ZNF737    | snp | 19 | 20728407  | 20728407  | A | T |
| MEN0121-P2 | ARPP21    | snp | 3  | 35763297  | 35763297  | C | T |
| MEN0121-P2 | PSTPIP1   | snp | 15 | 77300212  | 77300212  | A | G |
| MEN0121-P2 | TICAM1    | snp | 19 | 4817402   | 4817402   | C | T |
| MEN0121-P2 | WDR65     | snp | 1  | 43675591  | 43675591  | A | G |
| MEN0121-P2 | ZNF90     | snp | 19 | 20229884  | 20229884  | T | A |
| MEN0121-P2 | ZNF729    | snp | 19 | 22498260  | 22498260  | A | G |
| MEN0121-P2 | FBXO31    | snp | 16 | 87417161  | 87417161  | G | A |
| MEN0121-P2 | ZNF235    | snp | 19 | 44792890  | 44792890  | T | C |
| MEN0121-P2 | ARMC7     | snp | 17 | 73124919  | 73124919  | C | T |
| MEN0121-P2 | ZNF208    | snp | 19 | 22156590  | 22156590  | C | T |
| MEN0121-P2 | GRM5      | snp | 11 | 88780856  | 88780856  | T | A |
| MEN0121-P2 | ZNF729    | snp | 19 | 22498260  | 22498260  | A | G |
| MEN0121-P2 | FRY       | snp | 13 | 32783812  | 32783812  | T | G |
| MEN0121-P2 | IL17RD    | snp | 3  | 57132491  | 57132491  | C | T |
| MEN0121-P2 | ZNF844    | snp | 19 | 12187275  | 12187275  | G | C |
| MEN0121-P2 | FBXO31    | snp | 16 | 87417161  | 87417161  | G | A |
| MEN0121-P2 | TMEM165   | snp | 4  | 56262405  | 56262405  | C | T |
| MEN0121-P2 | APOB      | snp | 2  | 21247929  | 21247929  | G | A |
| MEN0121-P2 | PDE4DIP   | snp | 1  | 144994680 | 144994680 | C | G |
| MEN0121-P2 | ZNF208    | snp | 19 | 22155896  | 22155896  | A | C |
| MEN0121-P2 | WDR65     | snp | 1  | 43675591  | 43675591  | A | G |
| MEN0121-P2 | KMT2C     | snp | 7  | 151932922 | 151932922 | C | T |
| MEN0121-P2 | PSTPIP1   | snp | 15 | 77300212  | 77300212  | A | G |
| MEN0121-P2 | ARPP21    | snp | 3  | 35763297  | 35763297  | C | T |
| MEN0121-P2 | POLR1C    | snp | 6  | 43497019  | 43497019  | A | G |
| MEN0121-P2 | IKBKB     | snp | 8  | 42173736  | 42173736  | C | T |
| MEN0121-P2 | TICAM1    | snp | 19 | 4817402   | 4817402   | C | T |
| MEN0121-P2 | AOC1      | snp | 7  | 150554087 | 150554087 | T | A |
| MEN0121-P2 | ZNF235    | snp | 19 | 44792890  | 44792890  | T | C |
| MEN0121-P2 | FAT1      | snp | 4  | 187540099 | 187540099 | C | A |
| MEN0121-P2 | JUN       | snp | 1  | 59248709  | 59248709  | C | T |
| MEN0121-P2 | ZNF724P   | snp | 19 | 23405522  | 23405522  | T | C |
| MEN0121-P2 | ADCYAP1R1 | snp | 7  | 31126128  | 31126128  | A | G |
| MEN0121-P2 | TYW1      | snp | 7  | 66548448  | 66548448  | C | T |
| MEN0121-P2 | VCL       | snp | 10 | 75865010  | 75865010  | A | G |
| MEN0121-P2 | POU5F1B   | snp | 8  | 128428443 | 128428443 | C | T |
| MEN0121-P2 | ZNF90     | snp | 19 | 20229884  | 20229884  | T | A |
| MEN0121-P2 | DSCAM     | snp | 21 | 41550989  | 41550989  | C | T |
| MEN0121-P2 | ZNF93     | snp | 19 | 20044524  | 20044524  | A | G |
| MEN0121-P2 | NBPF1     | snp | 1  | 16892277  | 16892277  | G | A |



|            |           |     |    |           |           |   |   |
|------------|-----------|-----|----|-----------|-----------|---|---|
| MEN0121-P2 | ZNF737    | snp | 19 | 20728407  | 20728407  | A | T |
| MEN0121-P2 | NBPF3     | snp | 1  | 21806606  | 21806606  | T | G |
| MEN0121-P2 | SLAIN1    | snp | 13 | 78320909  | 78320909  | C | A |
| MEN0121-P2 | EPPIN     | snp | 20 | 44171423  | 44171423  | A | G |
| MEN0121-P2 | NBPF3     | snp | 1  | 21806573  | 21806573  | A | G |
| MEN0121-P3 | ULK4      | snp | 3  | 41939929  | 41939929  | T | A |
| MEN0121-P3 | CYP2C9    | snp | 10 | 96708931  | 96708931  | G | T |
| MEN0121-P3 | OR6N1     | snp | 1  | 158736390 | 158736390 | A | G |
| MEN0121-P3 | ADCYAP1R1 | snp | 7  | 31126128  | 31126128  | A | G |
| MEN0121-P3 | ARHGAP21  | snp | 10 | 24896527  | 24896527  | G | A |
| MEN0121-P3 | ZNF777    | snp | 7  | 149129698 | 149129698 | G | C |
| MEN0121-P3 | BDH2      | snp | 4  | 104006545 | 104006545 | A | C |
| MEN0121-P3 | TPRG1L    | snp | 1  | 3545097   | 3545097   | G | C |
| MEN0121-P3 | LMO7      | snp | 13 | 76408406  | 76408406  | A | T |
| MEN0121-P3 | SPIC      | snp | 12 | 101880180 | 101880180 | G | T |
| MEN0121-P3 | ULK4      | snp | 3  | 41939933  | 41939933  | T | C |
| MEN0121-P3 | RAP1B     | snp | 12 | 69050902  | 69050902  | C | G |
| MEN0121-P3 | TTN       | snp | 2  | 179482678 | 179482678 | C | A |
| MEN0121-P3 | IL17RD    | snp | 3  | 57132491  | 57132491  | C | T |
| MEN0121-P3 | APOB      | snp | 2  | 21247929  | 21247929  | G | A |
| MEN0121-P3 | UGT2B10   | snp | 4  | 69683758  | 69683758  | A | T |
| MEN0121-P3 | C11orf82  | snp | 11 | 82643984  | 82643984  | C | T |
| MEN0121-P3 | NIN       | snp | 14 | 51221546  | 51221546  | C | A |
| MEN0121-P3 | WDR72     | snp | 15 | 53907889  | 53907889  | A | T |
| MEN0121-P3 | QARS      | snp | 3  | 49140143  | 49140143  | C | G |
| MEN0121-P3 | FSIP2     | snp | 2  | 186669313 | 186669313 | A | C |
| MEN0121-P3 | ROS1      | snp | 6  | 117710556 | 117710556 | C | A |
| MEN0121-P3 | RNF213    | snp | 17 | 78286933  | 78286933  | C | T |
| MEN0121-P3 | ZNF678    | snp | 1  | 227842511 | 227842511 | A | G |
| MEN0121-P3 | ANKRD55   | snp | 5  | 55472088  | 55472088  | G | A |
| MEN0121-P3 | IGFL3     | snp | 19 | 46627402  | 46627402  | C | A |
| MEN0121-P3 | POU5F1B   | snp | 8  | 128428443 | 128428443 | C | T |
| MEN0121-P3 | FBXO38    | snp | 5  | 147813239 | 147813239 | G | C |
| MEN0121-P3 | COG1      | snp | 17 | 71193091  | 71193091  | G | C |
| MEN0121-P3 | NELL2     | snp | 12 | 45004687  | 45004687  | C | A |
| MEN0121-P3 | COG1      | snp | 17 | 71193469  | 71193469  | G | C |
| MEN0121-P3 | DNAH11    | snp | 7  | 21778423  | 21778423  | G | A |
| MEN0121-P3 | OR5M1     | snp | 11 | 56380959  | 56380959  | G | A |
| MEN0121-P3 | COG1      | snp | 17 | 71193063  | 71193063  | G | C |
| MEN0121-P3 | ARPP21    | snp | 3  | 35763297  | 35763297  | C | T |
| MEN0121-P3 | ANKRD17   | snp | 4  | 73957695  | 73957695  | C | A |
| MEN0121-P3 | WDR65     | snp | 1  | 43675591  | 43675591  | A | G |
| MEN0121-P3 | MAEL      | snp | 1  | 166958594 | 166958594 | C | T |
| MEN0121-P3 | COLGALT2  | snp | 1  | 184006433 | 184006433 | A | T |
| MEN0121-P3 | FAM155A   | snp | 13 | 108518715 | 108518715 | C | T |
| MEN0121-P3 | ULK4      | snp | 3  | 41939929  | 41939929  | T | A |
| MEN0121-P3 | COLGALT2  | snp | 1  | 184006433 | 184006433 | A | T |

|            |           |     |    |           |           |   |   |
|------------|-----------|-----|----|-----------|-----------|---|---|
| MEN0121-P3 | CYP2C9    | snp | 10 | 96708931  | 96708931  | G | T |
| MEN0121-P3 | RNF213    | snp | 17 | 78286933  | 78286933  | C | T |
| MEN0121-P3 | ZNF777    | snp | 7  | 149129698 | 149129698 | G | C |
| MEN0121-P3 | C11orf82  | snp | 11 | 82643984  | 82643984  | C | T |
| MEN0121-P3 | FBXO38    | snp | 5  | 147813239 | 147813239 | G | C |
| MEN0121-P3 | COG1      | snp | 17 | 71193063  | 71193063  | G | C |
| MEN0121-P3 | IL17RD    | snp | 3  | 57132491  | 57132491  | C | T |
| MEN0121-P3 | TPRG1L    | snp | 1  | 3545097   | 3545097   | G | C |
| MEN0121-P3 | ROS1      | snp | 6  | 117710556 | 117710556 | C | A |
| MEN0121-P3 | FSIP2     | snp | 2  | 186669313 | 186669313 | A | C |
| MEN0121-P3 | APOB      | snp | 2  | 21247929  | 21247929  | G | A |
| MEN0121-P3 | BDH2      | snp | 4  | 104006545 | 104006545 | A | C |
| MEN0121-P3 | OR6N1     | snp | 1  | 158736390 | 158736390 | A | G |
| MEN0121-P3 | ANKRD55   | snp | 5  | 55472088  | 55472088  | G | A |
| MEN0121-P3 | LMO7      | snp | 13 | 76408406  | 76408406  | A | T |
| MEN0121-P3 | WDR65     | snp | 1  | 43675591  | 43675591  | A | G |
| MEN0121-P3 | COG1      | snp | 17 | 71193469  | 71193469  | G | C |
| MEN0121-P3 | ARHGAP21  | snp | 10 | 24896527  | 24896527  | G | A |
| MEN0121-P3 | DNAH11    | snp | 7  | 21778423  | 21778423  | G | A |
| MEN0121-P3 | ANKRD17   | snp | 4  | 73957695  | 73957695  | C | A |
| MEN0121-P3 | ARPP21    | snp | 3  | 35763297  | 35763297  | C | T |
| MEN0121-P3 | WDR72     | snp | 15 | 53907889  | 53907889  | A | T |
| MEN0121-P3 | RAP1B     | snp | 12 | 69050902  | 69050902  | C | G |
| MEN0121-P3 | COG1      | snp | 17 | 71193091  | 71193091  | G | C |
| MEN0121-P3 | TTN       | snp | 2  | 179482678 | 179482678 | C | A |
| MEN0121-P3 | UGT2B10   | snp | 4  | 69683758  | 69683758  | A | T |
| MEN0121-P3 | IGFL3     | snp | 19 | 46627402  | 46627402  | C | A |
| MEN0121-P3 | QARS      | snp | 3  | 49140143  | 49140143  | C | G |
| MEN0121-P3 | OR5M1     | snp | 11 | 56380959  | 56380959  | G | A |
| MEN0121-P3 | ZNF678    | snp | 1  | 227842511 | 227842511 | A | G |
| MEN0121-P3 | NIN       | snp | 14 | 51221546  | 51221546  | C | A |
| MEN0121-P3 | MAEL      | snp | 1  | 166958594 | 166958594 | C | T |
| MEN0121-P3 | NELL2     | snp | 12 | 45004687  | 45004687  | C | A |
| MEN0121-P3 | ADCYAP1R1 | snp | 7  | 31126128  | 31126128  | A | G |
| MEN0121-P3 | SPIC      | snp | 12 | 101880180 | 101880180 | G | T |
| MEN0121-P3 | POU5F1B   | snp | 8  | 128428443 | 128428443 | C | T |
| MEN0121-P3 | FAM155A   | snp | 13 | 108518715 | 108518715 | C | T |
| MEN0121-P4 | ADCYAP1R1 | snp | 7  | 31126128  | 31126128  | A | G |
| MEN0121-P4 | TMEM165   | snp | 4  | 56262405  | 56262405  | C | T |
| MEN0121-P4 | JUN       | snp | 1  | 59248709  | 59248709  | C | T |
| MEN0121-P4 | DNAAF3    | snp | 19 | 55677738  | 55677738  | G | T |
| MEN0121-P4 | HECW2     | snp | 2  | 197085580 | 197085580 | T | C |
| MEN0121-P4 | KIAA1324L | snp | 7  | 86574279  | 86574279  | T | C |
| MEN0121-P4 | IKBKB     | snp | 8  | 42173736  | 42173736  | C | T |
| MEN0121-P4 | IL17RD    | snp | 3  | 57132491  | 57132491  | C | T |
| MEN0121-P4 | APOB      | snp | 2  | 21247929  | 21247929  | G | A |
| MEN0121-P4 | GBP7      | snp | 1  | 89607325  | 89607325  | C | T |

|            |            |     |    |           |           |   |   |
|------------|------------|-----|----|-----------|-----------|---|---|
| MEN0121-P4 | ARMC7      | snp | 17 | 73124919  | 73124919  | C | T |
| MEN0121-P4 | PCDHGA2    | snp | 5  | 140720207 | 140720207 | G | A |
| MEN0121-P4 | DSCAM      | snp | 21 | 41550989  | 41550989  | C | T |
| MEN0121-P4 | POU5F1B    | snp | 8  | 128428443 | 128428443 | C | T |
| MEN0121-P4 | SLAIN1     | snp | 13 | 78320909  | 78320909  | C | A |
| MEN0121-P4 | ZNF594     | snp | 17 | 5085547   | 5085547   | T | C |
| MEN0121-P4 | FRY        | snp | 13 | 32783812  | 32783812  | T | G |
| MEN0121-P4 | VCL        | snp | 10 | 75865010  | 75865010  | A | G |
| MEN0121-P4 | ZNF792     | snp | 19 | 35448889  | 35448889  | G | A |
| MEN0121-P4 | MCF2       | snp | X  | 138667305 | 138667305 | A | G |
| MEN0121-P4 | ARHGAP31   | snp | 3  | 119135085 | 119135085 | G | A |
| MEN0121-P4 | AASS       | snp | 7  | 121773582 | 121773582 | T | A |
| MEN0121-P4 | ANKRD30A   | snp | 10 | 37433929  | 37433929  | G | T |
| MEN0121-P4 | ARPP21     | snp | 3  | 35763297  | 35763297  | C | T |
| MEN0121-P4 | TICAM1     | snp | 19 | 4817402   | 4817402   | C | T |
| MEN0121-P4 | DLC1       | snp | 8  | 12957624  | 12957624  | C | G |
| MEN0121-P4 | SYTL2      | snp | 11 | 85445592  | 85445592  | C | G |
| MEN0121-P4 | WDR65      | snp | 1  | 43675591  | 43675591  | A | G |
| MEN0121-P4 | ALOX15     | snp | 17 | 4542725   | 4542725   | C | T |
| MEN0121-P4 | AC012313.1 | snp | 19 | 58907941  | 58907941  | C | A |
| MEN0121-P4 | ARMC7      | snp | 17 | 73124919  | 73124919  | C | T |
| MEN0121-P4 | KIAA1324L  | snp | 7  | 86574279  | 86574279  | T | C |
| MEN0121-P4 | HECW2      | snp | 2  | 197085580 | 197085580 | T | C |
| MEN0121-P4 | AASS       | snp | 7  | 121773582 | 121773582 | T | A |
| MEN0121-P4 | FRY        | snp | 13 | 32783812  | 32783812  | T | G |
| MEN0121-P4 | IL17RD     | snp | 3  | 57132491  | 57132491  | C | T |
| MEN0121-P4 | TMEM165    | snp | 4  | 56262405  | 56262405  | C | T |
| MEN0121-P4 | APOB       | snp | 2  | 21247929  | 21247929  | G | A |
| MEN0121-P4 | ZNF792     | snp | 19 | 35448889  | 35448889  | G | A |
| MEN0121-P4 | GBP7       | snp | 1  | 89607325  | 89607325  | C | T |
| MEN0121-P4 | WDR65      | snp | 1  | 43675591  | 43675591  | A | G |
| MEN0121-P4 | DNAAF3     | snp | 19 | 55677738  | 55677738  | G | T |
| MEN0121-P4 | AC012313.1 | snp | 19 | 58907941  | 58907941  | C | A |
| MEN0121-P4 | ZNF594     | snp | 17 | 5085547   | 5085547   | T | C |
| MEN0121-P4 | ARPP21     | snp | 3  | 35763297  | 35763297  | C | T |
| MEN0121-P4 | ARHGAP31   | snp | 3  | 119135085 | 119135085 | G | A |
| MEN0121-P4 | IKBKB      | snp | 8  | 42173736  | 42173736  | C | T |
| MEN0121-P4 | TICAM1     | snp | 19 | 4817402   | 4817402   | C | T |
| MEN0121-P4 | JUN        | snp | 1  | 59248709  | 59248709  | C | T |
| MEN0121-P4 | ADCYAP1R1  | snp | 7  | 31126128  | 31126128  | A | G |
| MEN0121-P4 | SYTL2      | snp | 11 | 85445592  | 85445592  | C | G |
| MEN0121-P4 | VCL        | snp | 10 | 75865010  | 75865010  | A | G |
| MEN0121-P4 | PCDHGA2    | snp | 5  | 140720207 | 140720207 | G | A |
| MEN0121-P4 | POU5F1B    | snp | 8  | 128428443 | 128428443 | C | T |
| MEN0121-P4 | MCF2       | snp | X  | 138667305 | 138667305 | A | G |
| MEN0121-P4 | DSCAM      | snp | 21 | 41550989  | 41550989  | C | T |
| MEN0121-P4 | DLC1       | snp | 8  | 12957624  | 12957624  | C | G |

|                |              |     |    |           |           |   |   |
|----------------|--------------|-----|----|-----------|-----------|---|---|
| MEN0121-P4     | ALOX15       | snp | 17 | 4542725   | 4542725   | C | T |
| MEN0121-P4     | SLAIN1       | snp | 13 | 78320909  | 78320909  | C | A |
| MEN0121-P4     | ANKRD30A     | snp | 10 | 37433929  | 37433929  | G | T |
| MEN0122-RBM-P1 | ZDHHC15      | snp | X  | 74742756  | 74742756  | G | A |
| MEN0122-RBM-P1 | LRRC37A3     | snp | 17 | 62856239  | 62856239  | A | G |
| MEN0122-RBM-P1 | ZNF253       | snp | 19 | 20002995  | 20002995  | C | A |
| MEN0122-RBM-P1 | NPIPA5       | snp | 16 | 15457638  | 15457638  | A | G |
| MEN0122-RBM-P1 | AC092964.1   | snp | 3  | 172039500 | 172039500 | A | T |
| MEN0122-RBM-P1 | ZNF99        | snp | 19 | 22941531  | 22941531  | G | T |
| MEN0122-RBM-P1 | SUMO1        | snp | 2  | 203096321 | 203096321 | A | C |
| MEN0122-RBM-P1 | ZNF721       | snp | 4  | 437339    | 437339    | G | T |
| MEN0122-RBM-P1 | LPA          | snp | 6  | 161026093 | 161026093 | G | T |
| MEN0122-RBM-P1 | ZNF385B      | snp | 2  | 180308170 | 180308170 | A | G |
| MEN0122-RBM-P1 | ZNF195       | snp | 11 | 3380694   | 3380694   | G | A |
| MEN0122-RBM-P1 | ANKRD36      | snp | 2  | 97875427  | 97875427  | G | A |
| MEN0122-RBM-P1 | ZNF138       | snp | 7  | 64292354  | 64292354  | G | A |
| MEN0122-RBM-P1 | ZNF257       | snp | 19 | 22271655  | 22271655  | A | G |
| MEN0122-RBM-P1 | NPIPA1       | snp | 16 | 15045638  | 15045638  | T | A |
| MEN0122-RBM-P1 | ZNF729       | snp | 19 | 22499682  | 22499682  | T | A |
| MEN0122-RBM-P1 | CTB-134H23.2 | snp | 16 | 29063558  | 29063558  | C | G |
| MEN0122-RBM-P1 | CTAGE5       | snp | 14 | 39746243  | 39746243  | T | C |
| MEN0122-RBM-P1 | TMPRSS12     | snp | 12 | 51279241  | 51279241  | G | T |
| MEN0122-RBM-P1 | CDC27        | snp | 17 | 45234359  | 45234359  | T | A |
| MEN0122-RBM-P1 | PAN3         | snp | 13 | 28841340  | 28841340  | C | T |
| MEN0122-RBM-P1 | PRB4         | snp | 12 | 11461672  | 11461672  | G | C |
| MEN0122-RBM-P1 | ZNF708       | snp | 19 | 21476519  | 21476519  | T | C |
| MEN0122-RBM-P1 | NUP153       | snp | 6  | 17652073  | 17652073  | T | C |
| MEN0122-RBM-P1 | ZNF724P      | snp | 19 | 23406281  | 23406281  | G | A |
| MEN0122-RBM-P1 | ZNF732       | snp | 4  | 265139    | 265139    | C | T |
| MEN0122-RBM-P1 | ANKRD36      | snp | 2  | 97875432  | 97875432  | A | C |
| MEN0122-RBM-P1 | ZNF93        | snp | 19 | 20045338  | 20045338  | T | C |
| MEN0122-RBM-P1 | FAM47C       | snp | X  | 37027815  | 37027815  | G | T |
| MEN0122-RBM-P1 | KHDRBS3      | snp | 8  | 136594267 | 136594267 | G | T |
| MEN0122-RBM-P1 | ZNF841       | snp | 19 | 52569771  | 52569771  | G | T |
| MEN0122-RBM-P1 | TPRXL        | snp | 3  | 14106310  | 14106310  | T | C |
| MEN0122-RBM-P1 | ZNF257       | snp | 19 | 22271654  | 22271654  | A | G |
| MEN0122-RBM-P1 | ADM2         | snp | 22 | 50921449  | 50921449  | C | T |
| MEN0122-RBM-P1 | ADAMTSL3     | snp | 15 | 84611798  | 84611798  | C | A |
| MEN0122-RBM-P1 | ZNF257       | snp | 19 | 22256329  | 22256329  | T | G |
| MEN0122-RBM-P1 | MUC4         | snp | 3  | 195506638 | 195506638 | G | T |
| MEN0122-RBM-P1 | ZNF486       | snp | 19 | 20307959  | 20307959  | C | A |
| MEN0122-RBM-P1 | ZNF681       | snp | 19 | 23927139  | 23927139  | T | G |
| MEN0122-RBM-P1 | BFSP1        | snp | 20 | 17475524  | 17475524  | T | C |
| MEN0122-RBM-P1 | FLG2         | snp | 1  | 152323303 | 152323303 | G | C |
| MEN0122-RBM-P1 | ACTR6        | snp | 12 | 100602573 | 100602573 | A | G |
| MEN0122-RBM-P1 | ZNF728       | snp | 19 | 23159220  | 23159220  | C | T |
| MEN0122-RBM-P1 | ZNF107       | snp | 7  | 64168240  | 64168240  | A | G |

|                              |     |    |           |           |   |   |
|------------------------------|-----|----|-----------|-----------|---|---|
| MEN0122-RBM-P1 G3BP1         | snp | 5  | 151170505 | 151170505 | G | A |
| MEN0122-RBM-P1 ADM2          | snp | 22 | 50921652  | 50921652  | C | T |
| MEN0122-RBM-P1 ZNF90         | snp | 19 | 20229706  | 20229706  | G | C |
| MEN0122-RBM-P1 ARHGAP8       | snp | 22 | 45204596  | 45204596  | T | C |
| MEN0122-RBM-P1 CTAGE5        | snp | 14 | 39746235  | 39746235  | C | T |
| MEN0122-RBM-P1 PDLIM5        | snp | 4  | 95377618  | 95377618  | A | G |
| MEN0122-RBM-P1 CDHR5         | snp | 11 | 618674    | 618674    | C | T |
| MEN0122-RBM-P1 NPIPA5        | snp | 16 | 15457656  | 15457656  | G | T |
| MEN0122-RBM-P1 CSMD3         | snp | 8  | 113662572 | 113662572 | G | T |
| MEN0122-RBM-P1 ZNF431        | snp | 19 | 21366366  | 21366366  | G | A |
| MEN0122-RBM-P1 NBPF3         | snp | 1  | 21804692  | 21804692  | G | T |
| MEN0122-RBM-P1 EN1           | snp | 2  | 119604523 | 119604523 | A | G |
| MEN0122-RBM-P1 ZNF729        | snp | 19 | 22499016  | 22499016  | A | G |
| MEN0122-RBM-P1 ZNF845        | snp | 19 | 53856360  | 53856360  | A | C |
| MEN0122-RBM-P1 SLC7A8        | snp | 14 | 23607157  | 23607157  | A | G |
| MEN0122-RBM-P1 ZNF737        | snp | 19 | 20727966  | 20727966  | C | T |
| MEN0122-RBM-P1 ZNF678        | snp | 1  | 227843138 | 227843138 | G | A |
| MEN0122-RBM-P1 IGHV3-11      | snp | 14 | 106573490 | 106573490 | T | G |
| MEN0122-RBM-P1 ZNF93         | snp | 19 | 20045017  | 20045017  | G | T |
| MEN0122-RBM-P1 ZNF626        | snp | 19 | 20807415  | 20807415  | C | T |
| MEN0122-RBM-P1 ZNF729        | snp | 19 | 22497318  | 22497318  | G | A |
| MEN0122-RBM-P1 NPIPB15       | snp | 16 | 74415479  | 74415479  | C | G |
| MEN0122-RBM-P1 ELMO1         | snp | 7  | 37243809  | 37243809  | T | C |
| MEN0122-RBM-P1 RP11-467N20.5 | snp | 15 | 23407305  | 23407305  | T | C |
| MEN0122-RBM-P1 ZNF727        | snp | 7  | 63538372  | 63538372  | T | A |
| MEN0122-RBM-P1 ZNF492        | snp | 19 | 22847878  | 22847878  | G | A |
| MEN0122-RBM-P1 USP17L2       | snp | 8  | 11995002  | 11995002  | C | T |
| MEN0122-RBM-P1 ZNF141        | snp | 4  | 367336    | 367336    | T | A |
| MEN0122-RBM-P1 HRNR          | snp | 1  | 152191890 | 152191890 | T | C |
| MEN0122-RBM-P1 ZNF736        | snp | 7  | 63809266  | 63809266  | T | A |
| MEN0122-RBM-P1 ZNF85         | snp | 19 | 21132356  | 21132356  | A | G |
| MEN0122-RBM-P1 ZNF678        | snp | 1  | 227842419 | 227842419 | C | A |
| MEN0122-RBM-P1 UBE2I         | snp | 16 | 1374783   | 1374783   | G | T |
| MEN0122-RBM-P1 ZNF678        | snp | 1  | 227843156 | 227843156 | T | A |
| MEN0122-RBM-P1 KATNBL1       | snp | 15 | 34434556  | 34434556  | A | G |
| MEN0122-RBM-P1 ZNF66         | snp | 19 | 20989766  | 20989766  | G | A |
| MEN0122-RBM-P1 ZNF732        | snp | 4  | 265500    | 265500    | A | T |
| MEN0122-RBM-P1 ZNF208        | snp | 19 | 22155518  | 22155518  | A | C |
| MEN0122-RBM-P1 ZNF91         | snp | 19 | 23544222  | 23544222  | A | C |
| MEN0122-RBM-P1 ZNF678        | snp | 1  | 227842915 | 227842915 | C | A |
| MEN0122-RBM-P1 ZNF729        | snp | 19 | 22499446  | 22499446  | G | A |
| MEN0122-RBM-P1 ZNF729        | snp | 19 | 22497267  | 22497267  | C | T |
| MEN0122-RBM-P1 PBX4          | snp | 19 | 19681631  | 19681631  | G | A |
| MEN0122-RBM-P1 ZNF729        | snp | 19 | 22497504  | 22497504  | A | G |
| MEN0122-RBM-P1 ZNF253        | snp | 19 | 20002885  | 20002885  | G | A |
| MEN0122-RBM-P1 ZNF43         | snp | 19 | 21990645  | 21990645  | G | T |
| MEN0122-RBM-P1 ZNF43         | snp | 19 | 21990711  | 21990711  | T | C |

|                         |     |    |           |           |   |   |
|-------------------------|-----|----|-----------|-----------|---|---|
| MEN0122-RBM-P1 ZNF43    | snp | 19 | 21991811  | 21991811  | G | T |
| MEN0122-RBM-P1 ZNF208   | snp | 19 | 22157070  | 22157070  | A | G |
| MEN0122-RBM-P1 CTAGE5   | snp | 14 | 39746235  | 39746235  | C | T |
| MEN0122-RBM-P1 ZNF737   | snp | 19 | 20727966  | 20727966  | C | T |
| MEN0122-RBM-P1 ZDHHC15  | snp | X  | 74742756  | 74742756  | G | A |
| MEN0122-RBM-P1 ZNF845   | snp | 19 | 53856360  | 53856360  | A | C |
| MEN0122-RBM-P1 NUP153   | snp | 6  | 17652073  | 17652073  | T | C |
| MEN0122-RBM-P1 ACTR6    | snp | 12 | 100602573 | 100602573 | A | G |
| MEN0122-RBM-P1 LRRC37A3 | snp | 17 | 62856239  | 62856239  | A | G |
| MEN0122-RBM-P1 TMPRSS12 | snp | 12 | 51279241  | 51279241  | G | T |
| MEN0122-RBM-P1 SUMO1    | snp | 2  | 203096321 | 203096321 | A | C |
| MEN0122-RBM-P1 ZNF385B  | snp | 2  | 180308170 | 180308170 | A | G |
| MEN0122-RBM-P1 ZNF727   | snp | 7  | 63538372  | 63538372  | T | A |
| MEN0122-RBM-P1 ZNF681   | snp | 19 | 23927139  | 23927139  | T | G |
| MEN0122-RBM-P1 ELMO1    | snp | 7  | 37243809  | 37243809  | T | C |
| MEN0122-RBM-P1 ZNF93    | snp | 19 | 20045017  | 20045017  | G | T |
| MEN0122-RBM-P1 IGHV3-11 | snp | 14 | 106573490 | 106573490 | T | G |
| MEN0122-RBM-P1 PAN3     | snp | 13 | 28841340  | 28841340  | C | T |
| MEN0122-RBM-P1 SLC7A8   | snp | 14 | 23607157  | 23607157  | A | G |
| MEN0122-RBM-P1 ADM2     | snp | 22 | 50921449  | 50921449  | C | T |
| MEN0122-RBM-P1 PDLIM5   | snp | 4  | 95377618  | 95377618  | A | G |
| MEN0122-RBM-P1 ZNF729   | snp | 19 | 22499682  | 22499682  | T | A |
| MEN0122-RBM-P1 BFSP1    | snp | 20 | 17475524  | 17475524  | T | C |
| MEN0122-RBM-P1 ZNF841   | snp | 19 | 52569771  | 52569771  | G | T |
| MEN0122-RBM-P1 ARHGAP8  | snp | 22 | 45204596  | 45204596  | T | C |
| MEN0122-RBM-P1 ZNF107   | snp | 7  | 64168240  | 64168240  | A | G |
| MEN0122-RBM-P1 ZNF678   | snp | 1  | 227843138 | 227843138 | G | A |
| MEN0122-RBM-P1 CSMD3    | snp | 8  | 113662572 | 113662572 | G | T |
| MEN0122-RBM-P1 MUC4     | snp | 3  | 195506638 | 195506638 | G | T |
| MEN0122-RBM-P1 ZNF138   | snp | 7  | 64292354  | 64292354  | G | A |
| MEN0122-RBM-P1 ZNF486   | snp | 19 | 20307959  | 20307959  | C | A |
| MEN0122-RBM-P1 PBX4     | snp | 19 | 19681631  | 19681631  | G | A |
| MEN0122-RBM-P1 CDC27    | snp | 17 | 45234359  | 45234359  | T | A |
| MEN0122-RBM-P1 ZNF732   | snp | 4  | 265500    | 265500    | A | T |
| MEN0122-RBM-P1 ZNF729   | snp | 19 | 22499016  | 22499016  | A | G |
| MEN0122-RBM-P1 ZNF728   | snp | 19 | 23159220  | 23159220  | C | T |
| MEN0122-RBM-P1 ZNF208   | snp | 19 | 22155518  | 22155518  | A | C |
| MEN0122-RBM-P1 ZNF729   | snp | 19 | 22497267  | 22497267  | C | T |
| MEN0122-RBM-P1 KATNBL1  | snp | 15 | 34434556  | 34434556  | A | G |
| MEN0122-RBM-P1 ZNF708   | snp | 19 | 21476519  | 21476519  | T | C |
| MEN0122-RBM-P1 ZNF85    | snp | 19 | 21132356  | 21132356  | A | G |
| MEN0122-RBM-P1 ZNF90    | snp | 19 | 20229706  | 20229706  | G | C |
| MEN0122-RBM-P1 ZNF729   | snp | 19 | 22497318  | 22497318  | G | A |
| MEN0122-RBM-P1 ZNF729   | snp | 19 | 22497504  | 22497504  | A | G |
| MEN0122-RBM-P1 NBPF3    | snp | 1  | 21804692  | 21804692  | G | T |
| MEN0122-RBM-P1 ZNF99    | snp | 19 | 22941531  | 22941531  | G | T |
| MEN0122-RBM-P1 ZNF195   | snp | 11 | 3380694   | 3380694   | G | A |

|                              |     |    |           |           |   |   |
|------------------------------|-----|----|-----------|-----------|---|---|
| MEN0122-RBM-P1 G3BP1         | snp | 5  | 151170505 | 151170505 | G | A |
| MEN0122-RBM-P1 ZNF43         | snp | 19 | 21990711  | 21990711  | T | C |
| MEN0122-RBM-P1 ZNF43         | snp | 19 | 21990645  | 21990645  | G | T |
| MEN0122-RBM-P1 FLG2          | snp | 1  | 152323303 | 152323303 | G | C |
| MEN0122-RBM-P1 ZNF678        | snp | 1  | 227842419 | 227842419 | C | A |
| MEN0122-RBM-P1 ZNF724P       | snp | 19 | 23406281  | 23406281  | G | A |
| MEN0122-RBM-P1 ZNF257        | snp | 19 | 22271654  | 22271654  | A | G |
| MEN0122-RBM-P1 NPIPA1        | snp | 16 | 15045638  | 15045638  | T | A |
| MEN0122-RBM-P1 LPA           | snp | 6  | 161026093 | 161026093 | G | T |
| MEN0122-RBM-P1 ZNF208        | snp | 19 | 22157070  | 22157070  | A | G |
| MEN0122-RBM-P1 ZNF93         | snp | 19 | 20045338  | 20045338  | T | C |
| MEN0122-RBM-P1 ZNF431        | snp | 19 | 21366366  | 21366366  | G | A |
| MEN0122-RBM-P1 ZNF492        | snp | 19 | 22847878  | 22847878  | G | A |
| MEN0122-RBM-P1 ZNF91         | snp | 19 | 23544222  | 23544222  | A | C |
| MEN0122-RBM-P1 ZNF721        | snp | 4  | 437339    | 437339    | G | T |
| MEN0122-RBM-P1 ANKRD36       | snp | 2  | 97875427  | 97875427  | G | A |
| MEN0122-RBM-P1 ZNF257        | snp | 19 | 22256329  | 22256329  | T | G |
| MEN0122-RBM-P1 ZNF253        | snp | 19 | 20002885  | 20002885  | G | A |
| MEN0122-RBM-P1 ZNF141        | snp | 4  | 367336    | 367336    | T | A |
| MEN0122-RBM-P1 UBE2I         | snp | 16 | 1374783   | 1374783   | G | T |
| MEN0122-RBM-P1 USP17L2       | snp | 8  | 11995002  | 11995002  | C | T |
| MEN0122-RBM-P1 HRNR          | snp | 1  | 152191890 | 152191890 | T | C |
| MEN0122-RBM-P1 NPIPA5        | snp | 16 | 15457638  | 15457638  | A | G |
| MEN0122-RBM-P1 ZNF732        | snp | 4  | 265139    | 265139    | C | T |
| MEN0122-RBM-P1 NPIPB15       | snp | 16 | 74415479  | 74415479  | C | G |
| MEN0122-RBM-P1 ZNF66         | snp | 19 | 20989766  | 20989766  | G | A |
| MEN0122-RBM-P1 CTB-134H23.2  | snp | 16 | 29063558  | 29063558  | C | G |
| MEN0122-RBM-P1 ZNF728        | snp | 19 | 23158787  | 23158787  | T | G |
| MEN0122-RBM-P1 ZNF626        | snp | 19 | 20807415  | 20807415  | C | T |
| MEN0122-RBM-P1 ZNF43         | snp | 19 | 21991811  | 21991811  | G | T |
| MEN0122-RBM-P1 ZNF678        | snp | 1  | 227842915 | 227842915 | C | A |
| MEN0122-RBM-P1 ZNF736        | snp | 7  | 63809266  | 63809266  | T | A |
| MEN0122-RBM-P1 ZNF729        | snp | 19 | 22499446  | 22499446  | G | A |
| MEN0122-RBM-P1 ZNF253        | snp | 19 | 20002995  | 20002995  | C | A |
| MEN0122-RBM-P1 KHDRBS3       | snp | 8  | 136594267 | 136594267 | G | T |
| MEN0122-RBM-P1 AC092964.1    | snp | 3  | 172039500 | 172039500 | A | T |
| MEN0122-RBM-P1 EN1           | snp | 2  | 119604523 | 119604523 | A | G |
| MEN0122-RBM-P1 ADAMTSL3      | snp | 15 | 84611798  | 84611798  | C | A |
| MEN0122-RBM-P1 FAM47C        | snp | X  | 37027815  | 37027815  | G | T |
| MEN0122-RBM-P1 CDHR5         | snp | 11 | 618674    | 618674    | C | T |
| MEN0122-RBM-P1 ADM2          | snp | 22 | 50921652  | 50921652  | C | T |
| MEN0122-RBM-P1 ZNF678        | snp | 1  | 227843156 | 227843156 | T | A |
| MEN0122-RBM-P1 TPRXL         | snp | 3  | 14106310  | 14106310  | T | C |
| MEN0122-RBM-P1 RP11-467N20.5 | snp | 15 | 23407305  | 23407305  | T | C |
| MEN0122-RBM-P1 PRB4          | snp | 12 | 11461672  | 11461672  | G | C |
| MEN0122-RBM-P2 ZDHHC15       | snp | X  | 74742756  | 74742756  | G | A |
| MEN0122-RBM-P2 GPR112        | snp | X  | 135429389 | 135429389 | C | A |

|                         |     |    |           |           |   |   |
|-------------------------|-----|----|-----------|-----------|---|---|
| MEN0122-RBM-P2 CDC27    | snp | 17 | 45247367  | 45247367  | T | C |
| MEN0122-RBM-P2 PCMTD1   | snp | 8  | 52733227  | 52733227  | C | T |
| MEN0122-RBM-P2 PRPF8    | snp | 17 | 1561862   | 1561862   | C | A |
| MEN0122-RBM-P2 DPPA4    | snp | 3  | 109050809 | 109050809 | G | T |
| MEN0122-RBM-P2 TMPRSS12 | snp | 12 | 51279241  | 51279241  | G | T |
| MEN0122-RBM-P2 UHRF1BP1 | snp | 6  | 34824162  | 34824162  | G | A |
| MEN0122-RBM-P2 ULK4     | snp | 3  | 41939933  | 41939933  | T | C |
| MEN0122-RBM-P2 ADM2     | snp | 22 | 50921449  | 50921449  | C | T |
| MEN0122-RBM-P2 LCT      | snp | 2  | 136575021 | 136575021 | G | T |
| MEN0122-RBM-P2 CDH6     | snp | 5  | 31305516  | 31305516  | C | T |
| MEN0122-RBM-P2 ATL3     | snp | 11 | 63426361  | 63426361  | A | C |
| MEN0122-RBM-P2 ADM2     | snp | 22 | 50921652  | 50921652  | C | T |
| MEN0122-RBM-P2 FBXL17   | snp | 5  | 107700659 | 107700659 | C | A |
| MEN0122-RBM-P2 WFDC8    | snp | 20 | 44207861  | 44207861  | C | T |
| MEN0122-RBM-P2 SLC25A5  | snp | X  | 118603742 | 118603742 | A | C |
| MEN0122-RBM-P2 CSMD3    | snp | 8  | 113353774 | 113353774 | T | C |
| MEN0122-RBM-P2 SIDT1    | snp | 3  | 113326974 | 113326974 | C | A |
| MEN0122-RBM-P2 ULK4     | snp | 3  | 41939933  | 41939933  | T | C |
| MEN0122-RBM-P2 PCMTD1   | snp | 8  | 52733227  | 52733227  | C | T |
| MEN0122-RBM-P2 ZDHHC15  | snp | X  | 74742756  | 74742756  | G | A |
| MEN0122-RBM-P2 SLC25A5  | snp | X  | 118603742 | 118603742 | A | C |
| MEN0122-RBM-P2 SIDT1    | snp | 3  | 113326974 | 113326974 | C | A |
| MEN0122-RBM-P2 CDC27    | snp | 17 | 45247367  | 45247367  | T | C |
| MEN0122-RBM-P2 TMPRSS12 | snp | 12 | 51279241  | 51279241  | G | T |
| MEN0122-RBM-P2 ATL3     | snp | 11 | 63426361  | 63426361  | A | C |
| MEN0122-RBM-P2 DPPA4    | snp | 3  | 109050809 | 109050809 | G | T |
| MEN0122-RBM-P2 ADM2     | snp | 22 | 50921449  | 50921449  | C | T |
| MEN0122-RBM-P2 CDH6     | snp | 5  | 31305516  | 31305516  | C | T |
| MEN0122-RBM-P2 PRPF8    | snp | 17 | 1561862   | 1561862   | C | A |
| MEN0122-RBM-P2 FBXL17   | snp | 5  | 107700659 | 107700659 | C | A |
| MEN0122-RBM-P2 UHRF1BP1 | snp | 6  | 34824162  | 34824162  | G | A |
| MEN0122-RBM-P2 LCT      | snp | 2  | 136575021 | 136575021 | G | T |
| MEN0122-RBM-P2 GPR112   | snp | X  | 135429389 | 135429389 | C | A |
| MEN0122-RBM-P2 CSMD3    | snp | 8  | 113353774 | 113353774 | T | C |
| MEN0122-RBM-P2 WFDC8    | snp | 20 | 44207861  | 44207861  | C | T |
| MEN0122-RBM-P2 ADM2     | snp | 22 | 50921652  | 50921652  | C | T |
| MEN0122-RBM-P3 ZDHHC15  | snp | X  | 74742756  | 74742756  | G | A |
| MEN0122-RBM-P3 GPR112   | snp | X  | 135429389 | 135429389 | C | A |
| MEN0122-RBM-P3 ZNF267   | snp | 16 | 31927455  | 31927455  | C | G |
| MEN0122-RBM-P3 ZNF479   | snp | 7  | 57188238  | 57188238  | C | T |
| MEN0122-RBM-P3 ZNF626   | snp | 19 | 20808090  | 20808090  | C | T |
| MEN0122-RBM-P3 SLC11A1  | snp | 2  | 219250207 | 219250207 | A | G |
| MEN0122-RBM-P3 FAM230A  | snp | 22 | 20710439  | 20710439  | C | T |
| MEN0122-RBM-P3 ZNF430   | snp | 19 | 21239983  | 21239983  | G | A |
| MEN0122-RBM-P3 NBPF10   | snp | 1  | 145359146 | 145359146 | T | C |
| MEN0122-RBM-P3 ULK4     | snp | 3  | 41939929  | 41939929  | T | A |
| MEN0122-RBM-P3 DPPA4    | snp | 3  | 109050809 | 109050809 | G | T |



|                |          |     |    |           |           |   |   |
|----------------|----------|-----|----|-----------|-----------|---|---|
| MEN0122-RBM-P3 | TMPRSS12 | snp | 12 | 51279241  | 51279241  | G | T |
| MEN0122-RBM-P3 | ZNF880   | snp | 19 | 52877732  | 52877732  | A | G |
| MEN0122-RBM-P3 | CDC27    | snp | 17 | 45234359  | 45234359  | T | A |
| MEN0122-RBM-P3 | ZNF729   | snp | 19 | 22498764  | 22498764  | A | G |
| MEN0122-RBM-P3 | ZNF714   | snp | 19 | 21300416  | 21300416  | C | G |
| MEN0122-RBM-P3 | ZNF732   | snp | 4  | 265139    | 265139    | C | T |
| MEN0122-RBM-P3 | ULK4     | snp | 3  | 41939933  | 41939933  | T | C |
| MEN0122-RBM-P3 | KHDRBS3  | snp | 8  | 136594267 | 136594267 | G | T |
| MEN0122-RBM-P3 | ZNF99    | snp | 19 | 22941699  | 22941699  | T | C |
| MEN0122-RBM-P3 | ADM2     | snp | 22 | 50921449  | 50921449  | C | T |
| MEN0122-RBM-P3 | LCT      | snp | 2  | 136575021 | 136575021 | G | T |
| MEN0122-RBM-P3 | ATL3     | snp | 11 | 63426361  | 63426361  | A | C |
| MEN0122-RBM-P3 | ABHD17A  | snp | 19 | 1881408   | 1881408   | A | G |
| MEN0122-RBM-P3 | ZNF66    | snp | 19 | 20989586  | 20989586  | A | G |
| MEN0122-RBM-P3 | ZNF430   | snp | 19 | 21240003  | 21240003  | A | G |
| MEN0122-RBM-P3 | FBXL17   | snp | 5  | 107700659 | 107700659 | C | A |
| MEN0122-RBM-P3 | SEC23A   | snp | 14 | 39562360  | 39562360  | T | C |
| MEN0122-RBM-P3 | WFDC8    | snp | 20 | 44207861  | 44207861  | C | T |
| MEN0122-RBM-P3 | ZNF714   | snp | 19 | 21300550  | 21300550  | G | A |
| MEN0122-RBM-P3 | ZNF254   | snp | 19 | 24310331  | 24310331  | T | G |
| MEN0122-RBM-P3 | CSMD3    | snp | 8  | 113353774 | 113353774 | T | C |
| MEN0122-RBM-P3 | ZNF716   | snp | 7  | 57528987  | 57528987  | C | T |
| MEN0122-RBM-P3 | ADAMTS2  | snp | 5  | 178578171 | 178578171 | A | T |
| MEN0122-RBM-P3 | ZNF681   | snp | 19 | 23926572  | 23926572  | T | C |
| MEN0122-RBM-P3 | ZNF728   | snp | 19 | 23158787  | 23158787  | T | G |
| MEN0122-RBM-P3 | ZNF91    | snp | 19 | 23544222  | 23544222  | A | C |
| MEN0122-RBM-P3 | ZNF724P  | snp | 19 | 23405690  | 23405690  | T | C |
| MEN0122-RBM-P3 | ZNF695   | snp | 1  | 247150500 | 247150500 | A | T |
| MEN0122-RBM-P3 | ZNF716   | snp | 7  | 57528892  | 57528892  | G | A |
| MEN0122-RBM-P3 | ZNF43    | snp | 19 | 21991811  | 21991811  | G | T |
| MEN0122-RBM-P3 | ULK4     | snp | 3  | 41939929  | 41939929  | T | A |
| MEN0122-RBM-P3 | ZDHC15   | snp | X  | 74742756  | 74742756  | G | A |
| MEN0122-RBM-P3 | ZNF880   | snp | 19 | 52877732  | 52877732  | A | G |
| MEN0122-RBM-P3 | TMPRSS12 | snp | 12 | 51279241  | 51279241  | G | T |
| MEN0122-RBM-P3 | ATL3     | snp | 11 | 63426361  | 63426361  | A | C |
| MEN0122-RBM-P3 | DPPA4    | snp | 3  | 109050809 | 109050809 | G | T |
| MEN0122-RBM-P3 | FAM230A  | snp | 22 | 20710439  | 20710439  | C | T |
| MEN0122-RBM-P3 | ADM2     | snp | 22 | 50921449  | 50921449  | C | T |
| MEN0122-RBM-P3 | NBPF10   | snp | 1  | 145359146 | 145359146 | T | C |
| MEN0122-RBM-P3 | FBXL17   | snp | 5  | 107700659 | 107700659 | C | A |
| MEN0122-RBM-P3 | SLC11A1  | snp | 2  | 219250207 | 219250207 | A | G |
| MEN0122-RBM-P3 | ZNF66    | snp | 19 | 20989586  | 20989586  | A | G |
| MEN0122-RBM-P3 | CDC27    | snp | 17 | 45234359  | 45234359  | T | A |
| MEN0122-RBM-P3 | ZNF729   | snp | 19 | 22498764  | 22498764  | A | G |
| MEN0122-RBM-P3 | ZNF714   | snp | 19 | 21300550  | 21300550  | G | A |
| MEN0122-RBM-P3 | ZNF716   | snp | 7  | 57528987  | 57528987  | C | T |
| MEN0122-RBM-P3 | LCT      | snp | 2  | 136575021 | 136575021 | G | T |

|                |          |     |    |           |           |   |   |
|----------------|----------|-----|----|-----------|-----------|---|---|
| MEN0122-RBM-P3 | GPR112   | snp | X  | 135429389 | 135429389 | C | A |
| MEN0122-RBM-P3 | ZNF716   | snp | 7  | 57528892  | 57528892  | G | A |
| MEN0122-RBM-P3 | ZNF430   | snp | 19 | 21239983  | 21239983  | G | A |
| MEN0122-RBM-P3 | ZNF99    | snp | 19 | 22941699  | 22941699  | T | C |
| MEN0122-RBM-P3 | ABHD17A  | snp | 19 | 1881408   | 1881408   | A | G |
| MEN0122-RBM-P3 | ZNF695   | snp | 1  | 247150500 | 247150500 | A | T |
| MEN0122-RBM-P3 | ZNF430   | snp | 19 | 21240003  | 21240003  | A | G |
| MEN0122-RBM-P3 | ADAMTS2  | snp | 5  | 178578171 | 178578171 | A | T |
| MEN0122-RBM-P3 | ZNF267   | snp | 16 | 31927455  | 31927455  | C | G |
| MEN0122-RBM-P3 | CSMD3    | snp | 8  | 113353774 | 113353774 | T | C |
| MEN0122-RBM-P3 | ZNF254   | snp | 19 | 24310331  | 24310331  | T | G |
| MEN0122-RBM-P3 | ZNF91    | snp | 19 | 23544222  | 23544222  | A | C |
| MEN0122-RBM-P3 | ZNF714   | snp | 19 | 21300416  | 21300416  | C | G |
| MEN0122-RBM-P3 | ZNF626   | snp | 19 | 20808090  | 20808090  | C | T |
| MEN0122-RBM-P3 | ZNF681   | snp | 19 | 23926572  | 23926572  | T | C |
| MEN0122-RBM-P3 | ZNF732   | snp | 4  | 265139    | 265139    | C | T |
| MEN0122-RBM-P3 | WFDC8    | snp | 20 | 44207861  | 44207861  | C | T |
| MEN0122-RBM-P3 | ZNF728   | snp | 19 | 23158787  | 23158787  | T | G |
| MEN0122-RBM-P3 | ZNF724P  | snp | 19 | 23405690  | 23405690  | T | C |
| MEN0122-RBM-P3 | ZNF479   | snp | 7  | 57188238  | 57188238  | C | T |
| MEN0122-RBM-P3 | ZNF43    | snp | 19 | 21991811  | 21991811  | G | T |
| MEN0122-RBM-P3 | SEC23A   | snp | 14 | 39562360  | 39562360  | T | C |
| MEN0122-RBM-P3 | KHDRBS3  | snp | 8  | 136594267 | 136594267 | G | T |
| MEN0122-RBM-P4 | ZDHHC15  | snp | X  | 74742756  | 74742756  | G | A |
| MEN0122-RBM-P4 | FAM230A  | snp | 22 | 20710406  | 20710406  | C | T |
| MEN0122-RBM-P4 | GPR112   | snp | X  | 135429389 | 135429389 | C | A |
| MEN0122-RBM-P4 | FAM230A  | snp | 22 | 20710439  | 20710439  | C | T |
| MEN0122-RBM-P4 | DPPA4    | snp | 3  | 109050809 | 109050809 | G | T |
| MEN0122-RBM-P4 | TMPRSS12 | snp | 12 | 51279241  | 51279241  | G | T |
| MEN0122-RBM-P4 | CDC27    | snp | 17 | 45234359  | 45234359  | T | A |
| MEN0122-RBM-P4 | ADM2     | snp | 22 | 50921449  | 50921449  | C | T |
| MEN0122-RBM-P4 | LCT      | snp | 2  | 136575021 | 136575021 | G | T |
| MEN0122-RBM-P4 | CDH6     | snp | 5  | 31305516  | 31305516  | C | T |
| MEN0122-RBM-P4 | FBXL17   | snp | 5  | 107700659 | 107700659 | C | A |
| MEN0122-RBM-P4 | UBXN4    | snp | 2  | 136505239 | 136505239 | G | C |
| MEN0122-RBM-P4 | WFDC8    | snp | 20 | 44207861  | 44207861  | C | T |
| MEN0122-RBM-P4 | C14orf23 | snp | 14 | 29282228  | 29282228  | A | G |
| MEN0122-RBM-P4 | SIDT1    | snp | 3  | 113326974 | 113326974 | C | A |
| MEN0122-RBM-P4 | ZDHHC15  | snp | X  | 74742756  | 74742756  | G | A |
| MEN0122-RBM-P4 | SIDT1    | snp | 3  | 113326974 | 113326974 | C | A |
| MEN0122-RBM-P4 | TMPRSS12 | snp | 12 | 51279241  | 51279241  | G | T |
| MEN0122-RBM-P4 | C14orf23 | snp | 14 | 29282228  | 29282228  | A | G |
| MEN0122-RBM-P4 | DPPA4    | snp | 3  | 109050809 | 109050809 | G | T |
| MEN0122-RBM-P4 | FAM230A  | snp | 22 | 20710406  | 20710406  | C | T |
| MEN0122-RBM-P4 | ADM2     | snp | 22 | 50921449  | 50921449  | C | T |
| MEN0122-RBM-P4 | CDH6     | snp | 5  | 31305516  | 31305516  | C | T |
| MEN0122-RBM-P4 | FBXL17   | snp | 5  | 107700659 | 107700659 | C | A |

|                |          |     |    |           |           |   |   |
|----------------|----------|-----|----|-----------|-----------|---|---|
| MEN0122-RBM-P4 | UBXN4    | snp | 2  | 136505239 | 136505239 | G | C |
| MEN0122-RBM-P4 | CDC27    | snp | 17 | 45234359  | 45234359  | T | A |
| MEN0122-RBM-P4 | LCT      | snp | 2  | 136575021 | 136575021 | G | T |
| MEN0122-RBM-P4 | GPR112   | snp | X  | 135429389 | 135429389 | C | A |
| MEN0122-RBM-P4 | FAM230A  | snp | 22 | 20710439  | 20710439  | C | T |
| MEN0122-RBM-P4 | WFDC8    | snp | 20 | 44207861  | 44207861  | C | T |
| MEN0122-RBM-P5 | ADAT1    | snp | 16 | 75632205  | 75632205  | G | C |
| MEN0122-RBM-P5 | CERS2    | snp | 1  | 150939101 | 150939101 | G | T |
| MEN0122-RBM-P5 | ZDHHC15  | snp | X  | 74742756  | 74742756  | G | A |
| MEN0122-RBM-P5 | GPR112   | snp | X  | 135429389 | 135429389 | C | A |
| MEN0122-RBM-P5 | ZNF729   | snp | 19 | 22497504  | 22497504  | A | G |
| MEN0122-RBM-P5 | DPPA4    | snp | 3  | 109050809 | 109050809 | G | T |
| MEN0122-RBM-P5 | TMPRSS12 | snp | 12 | 51279241  | 51279241  | G | T |
| MEN0122-RBM-P5 | COL23A1  | snp | 5  | 177989201 | 177989201 | A | C |
| MEN0122-RBM-P5 | TALDO1   | snp | 11 | 759052    | 759052    | C | T |
| MEN0122-RBM-P5 | KHDRBS3  | snp | 8  | 136594267 | 136594267 | G | T |
| MEN0122-RBM-P5 | ADM2     | snp | 22 | 50921449  | 50921449  | C | T |
| MEN0122-RBM-P5 | LCT      | snp | 2  | 136575021 | 136575021 | G | T |
| MEN0122-RBM-P5 | CDH6     | snp | 5  | 31305516  | 31305516  | C | T |
| MEN0122-RBM-P5 | ADM2     | snp | 22 | 50921652  | 50921652  | C | T |
| MEN0122-RBM-P5 | FBXL17   | snp | 5  | 107700659 | 107700659 | C | A |
| MEN0122-RBM-P5 | WFDC8    | snp | 20 | 44207861  | 44207861  | C | T |
| MEN0122-RBM-P5 | MYOZ3    | snp | 5  | 150051758 | 150051758 | C | A |
| MEN0122-RBM-P5 | MT-CYB   | snp | MT | 15498     | 15498     | G | A |
| MEN0122-RBM-P5 | SIDT1    | snp | 3  | 113326974 | 113326974 | C | A |
| MEN0122-RBM-P5 | ZDHHC15  | snp | X  | 74742756  | 74742756  | G | A |
| MEN0122-RBM-P5 | SIDT1    | snp | 3  | 113326974 | 113326974 | C | A |
| MEN0122-RBM-P5 | TMPRSS12 | snp | 12 | 51279241  | 51279241  | G | T |
| MEN0122-RBM-P5 | DPPA4    | snp | 3  | 109050809 | 109050809 | G | T |
| MEN0122-RBM-P5 | CERS2    | snp | 1  | 150939101 | 150939101 | G | T |
| MEN0122-RBM-P5 | ADM2     | snp | 22 | 50921449  | 50921449  | C | T |
| MEN0122-RBM-P5 | CDH6     | snp | 5  | 31305516  | 31305516  | C | T |
| MEN0122-RBM-P5 | FBXL17   | snp | 5  | 107700659 | 107700659 | C | A |
| MEN0122-RBM-P5 | MT-CYB   | snp | MT | 15498     | 15498     | G | A |
| MEN0122-RBM-P5 | COL23A1  | snp | 5  | 177989201 | 177989201 | A | C |
| MEN0122-RBM-P5 | LCT      | snp | 2  | 136575021 | 136575021 | G | T |
| MEN0122-RBM-P5 | GPR112   | snp | X  | 135429389 | 135429389 | C | A |
| MEN0122-RBM-P5 | TALDO1   | snp | 11 | 759052    | 759052    | C | T |
| MEN0122-RBM-P5 | ZNF729   | snp | 19 | 22497504  | 22497504  | A | G |
| MEN0122-RBM-P5 | WFDC8    | snp | 20 | 44207861  | 44207861  | C | T |
| MEN0122-RBM-P5 | MYOZ3    | snp | 5  | 150051758 | 150051758 | C | A |
| MEN0122-RBM-P5 | KHDRBS3  | snp | 8  | 136594267 | 136594267 | G | T |
| MEN0122-RBM-P5 | ADAT1    | snp | 16 | 75632205  | 75632205  | G | C |
| MEN0122-RBM-P5 | ADM2     | snp | 22 | 50921652  | 50921652  | C | T |
| MENex001       | RBBP5    | snp | 1  | 205066482 | 205066482 | C | T |
| MENex001       | ALDOC    | snp | 17 | 26901135  | 26901135  | G | A |
| MENex001       | VPS33B   | snp | 15 | 91551125  | 91551125  | G | C |

|          |          |     |    |           |           |   |   |
|----------|----------|-----|----|-----------|-----------|---|---|
| MENex001 | MAGED1   | snp | X  | 51643364  | 51643364  | A | G |
| MENex001 | OR2L5    | snp | 1  | 248185925 | 248185925 | C | T |
| MENex001 | PCDHA4   | snp | 5  | 140187949 | 140187949 | G | A |
| MENex001 | UNC45B   | snp | 17 | 33482369  | 33482369  | G | A |
| MENex001 | KBTBD6   | snp | 13 | 41705327  | 41705327  | C | A |
| MENex001 | TPTE     | snp | 21 | 10941969  | 10941969  | C | A |
| MENex001 | EFHC1    | snp | 6  | 52317709  | 52317709  | G | A |
| MENex001 | MS4A4A   | snp | 11 | 60059787  | 60059787  | C | T |
| MENex001 | ALG1     | snp | 16 | 5132577   | 5132577   | G | A |
| MENex001 | RSF1     | snp | 11 | 77388026  | 77388026  | T | C |
| MENex001 | ERVFRD-1 | snp | 6  | 11104217  | 11104217  | T | G |
| MENex001 | LIPG     | snp | 18 | 47101895  | 47101895  | C | G |
| MENex001 | TET3     | snp | 2  | 74274327  | 74274327  | C | T |
| MENex001 | ALDOC    | snp | 17 | 26901135  | 26901135  | G | A |
| MENex001 | PCDHA4   | snp | 5  | 140187949 | 140187949 | G | A |
| MENex001 | MAGED1   | snp | X  | 51643364  | 51643364  | A | G |
| MENex001 | MS4A4A   | snp | 11 | 60059787  | 60059787  | C | T |
| MENex001 | TPTE     | snp | 21 | 10941969  | 10941969  | C | A |
| MENex001 | UNC45B   | snp | 17 | 33482369  | 33482369  | G | A |
| MENex001 | KBTBD6   | snp | 13 | 41705327  | 41705327  | C | A |
| MENex001 | ALG1     | snp | 16 | 5132577   | 5132577   | G | A |
| MENex001 | EFHC1    | snp | 6  | 52317709  | 52317709  | G | A |
| MENex001 | ERVFRD-1 | snp | 6  | 11104217  | 11104217  | T | G |
| MENex001 | OR2L5    | snp | 1  | 248185925 | 248185925 | C | T |
| MENex001 | RSF1     | snp | 11 | 77388026  | 77388026  | T | C |
| MENex001 | TET3     | snp | 2  | 74274327  | 74274327  | C | T |
| MENex001 | VPS33B   | snp | 15 | 91551125  | 91551125  | G | C |
| MENex001 | RBBP5    | snp | 1  | 205066482 | 205066482 | C | T |
| MENex001 | LIPG     | snp | 18 | 47101895  | 47101895  | C | G |
| MENex002 | ESRRA    | snp | 11 | 64083328  | 64083328  | C | T |
| MENex002 | GALNT13  | snp | 2  | 155098617 | 155098617 | G | A |
| MENex002 | RUNX3    | snp | 1  | 25228811  | 25228811  | G | T |
| MENex002 | HERC2    | snp | 15 | 28566548  | 28566548  | T | C |
| MENex002 | GNPTAB   | snp | 12 | 102163959 | 102163959 | C | T |
| MENex002 | PHF23    | snp | 17 | 7140709   | 7140709   | T | G |
| MENex002 | ESRRA    | snp | 11 | 64083328  | 64083328  | C | T |
| MENex002 | RUNX3    | snp | 1  | 25228811  | 25228811  | G | T |
| MENex002 | HERC2    | snp | 15 | 28566548  | 28566548  | T | C |
| MENex002 | GNPTAB   | snp | 12 | 102163959 | 102163959 | C | T |
| MENex002 | PHF23    | snp | 17 | 7140709   | 7140709   | T | G |
| MENex002 | GALNT13  | snp | 2  | 155098617 | 155098617 | G | A |
| MENex004 | ARL6IP1  | snp | 16 | 18805974  | 18805974  | G | A |
| MENex004 | SLC52A3  | snp | 20 | 744485    | 744485    | G | T |
| MENex004 | JARID2   | snp | 6  | 15517416  | 15517416  | G | A |
| MENex004 | RNF103   | snp | 2  | 86832101  | 86832101  | G | A |
| MENex004 | TET1     | snp | 10 | 70406483  | 70406483  | A | G |
| MENex004 | PPP1R14D | snp | 15 | 41120586  | 41120586  | T | A |

|          |          |     |    |           |           |   |   |
|----------|----------|-----|----|-----------|-----------|---|---|
| MENex004 | ABCB1    | snp | 7  | 87190658  | 87190658  | C | G |
| MENex004 | BRWD3    | snp | X  | 79978195  | 79978195  | G | A |
| MENex004 | SRGN     | snp | 10 | 70863653  | 70863653  | G | A |
| MENex004 | ZFP92    | snp | X  | 152683794 | 152683794 | T | G |
| MENex004 | ENDOV    | snp | 17 | 78409975  | 78409975  | A | G |
| MENex004 | CNBP     | snp | 3  | 128890507 | 128890507 | G | A |
| MENex004 | SDR16C5  | snp | 8  | 57219235  | 57219235  | C | T |
| MENex004 | IFNW1    | snp | 9  | 21141089  | 21141089  | C | T |
| MENex004 | DNAH17   | snp | 17 | 76498708  | 76498708  | A | G |
| MENex004 | EIF3D    | snp | 22 | 36914954  | 36914954  | C | T |
| MENex004 | NDUFV2   | snp | 18 | 9122611   | 9122611   | T | C |
| MENex004 | COL17A1  | snp | 10 | 105836175 | 105836175 | C | T |
| MENex004 | FBXW10   | snp | 17 | 18682505  | 18682505  | T | C |
| MENex004 | TMF1     | snp | 3  | 69082743  | 69082743  | G | A |
| MENex004 | FANCD2   | snp | 3  | 10114944  | 10114944  | A | C |
| MENex004 | CLEC18A  | snp | 16 | 69996928  | 69996928  | G | A |
| MENex004 | C4BPA    | snp | 1  | 207317277 | 207317277 | C | T |
| MENex004 | FBXW10   | snp | 17 | 18682505  | 18682505  | T | C |
| MENex004 | SLC52A3  | snp | 20 | 744485    | 744485    | G | T |
| MENex004 | PPP1R14D | snp | 15 | 41120586  | 41120586  | T | A |
| MENex004 | JARID2   | snp | 6  | 15517416  | 15517416  | G | A |
| MENex004 | BRWD3    | snp | X  | 79978195  | 79978195  | G | A |
| MENex004 | CLEC18A  | snp | 16 | 69996928  | 69996928  | G | A |
| MENex004 | ARL6IP1  | snp | 16 | 18805974  | 18805974  | G | A |
| MENex004 | RNF103   | snp | 2  | 86832101  | 86832101  | G | A |
| MENex004 | DNAH17   | snp | 17 | 76498708  | 76498708  | A | G |
| MENex004 | IFNW1    | snp | 9  | 21141089  | 21141089  | C | T |
| MENex004 | C4BPA    | snp | 1  | 207317277 | 207317277 | C | T |
| MENex004 | TMF1     | snp | 3  | 69082743  | 69082743  | G | A |
| MENex004 | EIF3D    | snp | 22 | 36914954  | 36914954  | C | T |
| MENex004 | ABCB1    | snp | 7  | 87190658  | 87190658  | C | G |
| MENex004 | CNBP     | snp | 3  | 128890507 | 128890507 | G | A |
| MENex004 | SDR16C5  | snp | 8  | 57219235  | 57219235  | C | T |
| MENex004 | ZFP92    | snp | X  | 152683794 | 152683794 | T | G |
| MENex004 | TET1     | snp | 10 | 70406483  | 70406483  | A | G |
| MENex004 | SRGN     | snp | 10 | 70863653  | 70863653  | G | A |
| MENex004 | NDUFV2   | snp | 18 | 9122611   | 9122611   | T | C |
| MENex004 | COL17A1  | snp | 10 | 105836175 | 105836175 | C | T |
| MENex004 | FANCD2   | snp | 3  | 10114944  | 10114944  | A | C |
| MENex004 | ENDOV    | snp | 17 | 78409975  | 78409975  | A | G |
| MENex005 | ZSWIM8   | snp | 10 | 75561189  | 75561189  | A | T |
| MENex005 | CLEC18B  | snp | 16 | 74451961  | 74451961  | G | A |
| MENex005 | CLK3     | snp | 15 | 74919950  | 74919950  | A | G |
| MENex005 | BAI3     | snp | 6  | 69349189  | 69349189  | G | C |
| MENex005 | KLHDC7A  | snp | 1  | 18809555  | 18809555  | C | T |
| MENex005 | ESRRB    | snp | 14 | 76905940  | 76905940  | G | C |
| MENex005 | WIPF1    | snp | 2  | 175432731 | 175432731 | C | A |

|          |            |     |            |           |           |   |   |
|----------|------------|-----|------------|-----------|-----------|---|---|
| MENex005 | CYP4B1     | snp | 1          | 47280757  | 47280757  | C | T |
| MENex005 | CST8       | snp | 20         | 23472444  | 23472444  | A | G |
| MENex005 | DMWD       | snp | 19         | 46289600  | 46289600  | T | G |
| MENex005 | HDLBP      | snp | 2          | 242176119 | 242176119 | C | G |
| MENex005 | FSCB       | snp | 14         | 44974261  | 44974261  | C | A |
| MENex005 | DNHD1      | snp | 11         | 6592389   | 6592389   | G | C |
| MENex005 | ALPP       | snp | 2          | 233246249 | 233246249 | A | G |
| MENex005 | DMWD       | snp | 19         | 46289600  | 46289600  | T | G |
| MENex005 | KLHDC7A    | snp | 1          | 18809555  | 18809555  | C | T |
| MENex005 | DNHD1      | snp | 11         | 6592389   | 6592389   | G | C |
| MENex005 | ZSWIM8     | snp | 10         | 75561189  | 75561189  | A | T |
| MENex005 | CLK3       | snp | 15         | 74919950  | 74919950  | A | G |
| MENex005 | WIPF1      | snp | 2          | 175432731 | 175432731 | C | A |
| MENex005 | CYP4B1     | snp | 1          | 47280757  | 47280757  | C | T |
| MENex005 | CLEC18B    | snp | 16         | 74451961  | 74451961  | G | A |
| MENex005 | ALPP       | snp | 2          | 233246249 | 233246249 | A | G |
| MENex005 | CST8       | snp | 20         | 23472444  | 23472444  | A | G |
| MENex005 | ESRRB      | snp | 14         | 76905940  | 76905940  | G | C |
| MENex005 | BAI3       | snp | 6          | 69349189  | 69349189  | G | C |
| MENex005 | FSCB       | snp | 14         | 44974261  | 44974261  | C | A |
| MENex005 | HDLBP      | snp | 2          | 242176119 | 242176119 | C | G |
| MENex006 | RPS15      | snp | 19         | 1440068   | 1440068   | G | C |
| MENex006 | KIF16B     | snp | 20         | 16553877  | 16553877  | C | T |
| MENex006 | SMO        | snp | 7          | 128850341 | 128850341 | G | T |
| MENex006 | PCDHB7     | snp | 5          | 140552940 | 140552940 | A | G |
| MENex006 | MUC4       | snp | 3          | 195505855 | 195505855 | G | T |
| MENex006 | PRSS12     | snp | 4          | 119234488 | 119234488 | C | T |
| MENex006 | SUPT5H     | snp | 19         | 39965042  | 39965042  | G | C |
| MENex006 | LETM1      | snp | 4          | 1838284   | 1838284   | C | T |
| MENex006 | AL354822.1 | snp | 3L000218.1 | 40869     | 40869     | G | A |
| MENex006 | PRKD2      | snp | 19         | 47195049  | 47195049  | A | G |
| MENex006 | FAM221B    | snp | 9          | 35825358  | 35825358  | C | T |
| MENex006 | SMO        | snp | 7          | 128850341 | 128850341 | G | T |
| MENex006 | LETM1      | snp | 4          | 1838284   | 1838284   | C | T |
| MENex006 | PCDHB7     | snp | 5          | 140552940 | 140552940 | A | G |
| MENex006 | RPS15      | snp | 19         | 1440068   | 1440068   | G | C |
| MENex006 | PRKD2      | snp | 19         | 47195049  | 47195049  | A | G |
| MENex006 | FAM221B    | snp | 9          | 35825358  | 35825358  | C | T |
| MENex006 | KIF16B     | snp | 20         | 16553877  | 16553877  | C | T |
| MENex006 | SUPT5H     | snp | 19         | 39965042  | 39965042  | G | C |
| MENex006 | MUC4       | snp | 3          | 195505855 | 195505855 | G | T |
| MENex006 | PRSS12     | snp | 4          | 119234488 | 119234488 | C | T |
| MENex006 | AL354822.1 | snp | 3L000218.1 | 40869     | 40869     | G | A |

| Allele       | Peptide        |
|--------------|----------------|
| HLA-A02:01   | GLWRCRSTRL     |
| HLA-C12:03   | FAKERESGE      |
| HLA-C03:04   | KAAAAAAAAAPA   |
| HLA-C12:03   | PSSRIVGAV      |
| HLA-C03:04   | SSSSSSSSSS     |
| HLA-C12:03   | QQQQQQQQQ      |
| HLA-C03:04   | GSSSSSSSSE     |
| HLA-DQA105:C | TKAAAAAAAAAPA  |
| HLA-DQA105:C | GEPKGFHEAAAP   |
| HLA-DRB111:0 | ERGLWRCRSTRL   |
| HLA-DQA105:C | PSSRIVGAVSSEG  |
| HLA-DQA105:C | SGSSGGSSSSSSS  |
| HLA-DQA105:C | STAPSSSSSSSSSS |
| HLA-DQA105:C | QQQQQQQQPPF    |
| HLA-A02:01   | GLWRCRSTRL     |
| HLA-C12:03   | FAKERESGE      |
| HLA-C03:04   | KAAAAAAAAAPA   |
| HLA-C12:03   | PSSRIVGAV      |
| HLA-C03:04   | SSSSSSSSSS     |
| HLA-C12:03   | QQQQQQQQQ      |
| HLA-DQA105:C | TKAAAAAAAAAPA  |
| HLA-DQA105:C | GEPKGFHEAAAP   |
| HLA-DRB111:0 | ERGLWRCRSTRL   |
| HLA-DQA105:C | PSSRIVGAVSSEG  |
| HLA-DQA105:C | STAPSSSSSSSSSS |
| HLA-DQA105:C | QQQQQQQQPPF    |
| HLA-A02:01   | MLLQMLWYV      |
| HLA-A02:01   | KLWFSLINI      |
| HLA-C05:01   | FADIASHPGRL    |
| HLA-A02:01   | HLLMCPCGV      |
| HLA-B44:02   | SEASVNNLW      |
| HLA-A02:01   | LLVDVVYIFL     |
| HLA-A02:01   | MLLPQSLSQSL    |
| HLA-A02:01   | RLSSCVPV       |
| HLA-A02:01   | SLSKPVGTPV     |
| HLA-B44:02   | AEEEEAEAAF     |
| HLA-B44:02   | KEGHLRVVEFW    |
| HLA-A02:01   | SLASSHLL       |
| HLA-B44:02   | KEKQQDMRW      |
| HLA-A02:01   | ALLLLLSL       |
| HLA-A02:01   | RLPPSWAWA      |
| HLA-A02:01   | KMLNQKCLA      |
| HLA-A02:01   | KLKPYRSVLV     |
| HLA-A02:01   | GLWRCRSTRL     |
| HLA-B44:02   | GENGGVCGL      |
| HLA-B44:02   | GEQGETNEF      |

HLA-C05:01 PAEEAPSEV  
HLA-A02:01 TLDTLTHPDTL  
HLA-A02:01 STAVFSFGA  
HLA-A02:01 ALIKKKKTAPT  
HLA-C05:01 TSEEVVVVA  
HLA-B44:02 KEQGSSVLL  
HLA-C05:01 KEEEEEASK  
HLA-C05:01 VSSPLCCQT  
HLA-C05:01 LEEEEEEDE  
HLA-B44:02 SPQQQQQT  
HLA-C05:01 MSWRGRSTYY  
HLA-A02:01 ALNPGPRTQGS  
HLA-A02:01 QAFNHKKQQQV  
HLA-C05:01 DEEEEEEEK  
HLA-C05:01 QQQQHQQQQ  
HLA-C05:01 HTGPCCCCP  
HLA-C05:01 ANPPAPAAT  
HLA-C05:01 PCCCRPSCC  
HLA-C05:01 CPGPGPSPG  
HLA-C05:01 PSNHHHHNH  
HLA-A02:01 SGCGGCGSGCA  
HLA-B44:02 RQQQQQQQR  
HLA-B44:02 RSRERERK  
HLA-B44:02 MDVRKKKKKN  
HLA-A02:01 GCWGKKKKKS  
HLA-DRB108:0 YFCFFRTC VKKKM  
HLA-DRB108:0 KTNLFSALIKKKKT  
HLA-DRB108:0 VVQVAKKLPYR  
HLA-DRB108:0 HVPTWSARLLTR  
HLA-DRB108:0 QMLWYVGRSSAI  
HLA-DQA104:C STAVFSFGAATSS  
HLA-DRB108:0 WFSLINIHRKNP  
HLA-DRB104:0 QVLFRRNLTPSQL  
HLA-DRB108:0 KCIMKEKSLVRL  
HLA-DQA104:C SCAGAYSSAPAGI  
HLA-DRB108:0 RSSLRSLSKPVGTI  
HLA-DRB108:0 RSTYYRPRRRYV  
HLA-DRB108:0 ERGLWRCRSTRLC  
HLA-DQA104:C VCGLESASAVPGC  
HLA-DQA103:C AEEEEAEAAAFP  
HLA-DRB104:0 FYLMELATALLLLI  
HLA-DRB104:0 KQGLLSEASVNNI  
HLA-DRB104:0 IPSLLTLDTLHPD  
HLA-DRB108:0 TPQIQAFNHKKQ  
HLA-DRB108:0 RPAIARTQSVRTC  
HLA-DRB108:0 SEEVVVVAKPKGI  
HLA-DRB104:0 HHCLQTQSLASSI



HLA-DQA104:C PASTTPASTTPAS`  
HLA-DQA104:C PATTANPPAPAA`  
HLA-DRB108:0 GIIDCVVRIPKEQC  
HLA-DRB104:0 VDVVYIFLTLSCLC  
HLA-DRB108:0 KMSQEICTLKKEK  
HLA-DQA103:C CDVIEYPLEEEEE  
HLA-DRB108:0 EMDVRKKKKKNC  
HLA-DRB108:0 HLAAKEGHLRVVI  
HLA-DQA104:C PQQQQQTYGAIH  
HLA-DQA103:C SEVQPPPAEEAP/  
HLA-DRB108:0 SSGCWGKKKKKK  
HLA-DRB108:0 PCCCCPCCPRLLL`  
HLA-DQA104:C TCRPSCGVSSPLC  
HLA-DQA104:C KEEEEEASKVASK  
HLA-DQA104:C GLGHMPEPALNF  
HLA-DQA104:C GSGCGGCGSGCA  
HLA-DRB104:0 PTTTTTTTTTTTTI  
HLA-DRB108:0 GLEKSPMKKKTEE  
HLA-DRB108:0 NHHHHNHSHKI  
HLA-DQA104:C DSETQPDEEEEE  
HLA-DRB108:0 SCCQTTCCRTTCC  
HLA-DQA104:C SLKFSPGPCPGPG  
HLA-DRB108:0 VVQQQQQQQQQ(  
HLA-DRB108:0 RQQQQQQQQR(  
HLA-DRB104:0 PNRKDDRSREREI  
HLA-DRB108:0 QQQQQQQQHQ  
HLA-A02:01 FLVTFLTML  
HLA-C05:01 FADIASHPGRL  
HLA-A02:01 SLLLLAYAFYV  
HLA-A02:01 FLHLVQSLV  
HLA-A02:01 CLSQIFFSL  
HLA-A02:01 RIFKFSPLL  
HLA-B44:02 KEGHLRVVEFW  
HLA-A02:01 GMWRPLTLA  
HLA-A02:01 GMPEASSSSV  
HLA-B44:02 RERNQFHEFW  
HLA-C05:01 IADTLRQQQQL  
HLA-A02:01 SLASSHLL  
HLA-B44:02 KEKQQDMRW  
HLA-C05:01 YSDWKEKKNI  
HLA-B44:02 REREAVGIW  
HLA-A02:01 GLWRCRSTRL  
HLA-B44:02 CEGCDDSSIF  
HLA-C05:01 CIDTCEKEL  
HLA-A02:01 IIMKKMRRPV  
HLA-C05:01 PAEEAPSEV  
HLA-B44:02 DEEEEGGSW

HLA-A02:01 HINDKTYEM  
HLA-A02:01 TMSSSASAAA  
HLA-A02:01 TLKKKNQEIVV  
HLA-B44:02 EEQEKKSRKL  
HLA-B44:02 KEQGSSVLL  
HLA-B44:02 QEKKSRKRAV  
HLA-B44:02 RERDEKKKC  
HLA-B44:02 EELEKKNSDC  
HLA-C05:01 VSSPLCCQT  
HLA-B44:02 EENSLVKKKK  
HLA-C05:01 MSWRGRSTYY  
HLA-A02:01 GLRPPPPPHDM  
HLA-A02:01 RLQRERAP  
HLA-B44:02 REIKRLKKRN  
HLA-B44:02 LEGQKHKKKKL  
HLA-B44:02 RERTREREG  
HLA-C05:01 ANPPAPAAT  
HLA-C05:01 PCCCRPSCC  
HLA-C05:01 CPGPGPSPG  
HLA-C05:01 PSNHHHHNH  
HLA-C05:01 SAAAAAAAAAGT  
HLA-B44:02 YHHHHHHHHR  
HLA-A02:01 GCWGGKKKKKS  
HLA-DQA104:C LKEESAAAAAAA/  
HLA-DRB108:0 GQIIMKKMRRPV  
HLA-DRB108:0 WRPLTLARRTKSL  
HLA-DRB108:0 TLRVFRVFRIFKFS  
HLA-DQA104:C PPTMSSSASAAAI  
HLA-DRB108:0 LVTFLTMLPSFHL  
HLA-DRB108:0 ERLRKRFLHLVQS  
HLA-DRB108:0 KTYEMHKMRPKK  
HLA-DRB108:0 PREIKRLKKRNQR  
HLA-DQA104:C SCAGAYSSAPAGI  
HLA-DRB108:0 RSTYYRPRRRYV  
HLA-DRB108:0 QNEIQKLQKTLKK  
HLA-DRB108:0 ERGLWRCRSTRL  
HLA-DRB104:0 FHEFWRMSDSRL  
HLA-DRB108:0 IALAWMPKATVC  
HLA-DRB104:0 HHCLQTQSLASSI  
HLA-DQA104:C PATTANPPAPAA  
HLA-DRB108:0 LPLLIADTLRQQQ  
HLA-DQA104:C LSQNGMPEASSS  
HLA-DRB108:0 LSQIFFSLHLDAAW  
HLA-DRB108:0 EQEKSRKRAVSI  
HLA-DRB108:0 GIIDCVVRIPKEQC  
HLA-DRB108:0 KMSQEICTLKKEK  
HLA-DRB108:0 KEHLEGQKHKKKI

HLA-DRB108:0 LEEQEKKSRKLMS  
HLA-DQA104:C LDSLIAWWESLLL  
HLA-DRB104:0 QPLEKNRFCSSSS  
HLA-DRB108:0 HHHYHHHHHHH  
HLA-DRB108:0 HLAAKEGHLRVVI  
HLA-DRB104:0 LSVTSEENSLVKKI  
HLA-DQA103:C CEKELGAGGDRLI  
HLA-DRB108:0 REERERLQRERAF  
HLA-DQA103:C SEVQPPPAEEAP/  
HLA-DRB108:0 SSGCWGKKKKKK  
HLA-DQA104:C TCRPSCGVSSPLC  
HLA-DQA104:C VSKQNSIIEELEKK  
HLA-DQA104:C GMTRDEDDDEEI  
HLA-DRB108:0 NHHHHNHSHKI  
HLA-DQA103:C EWSKEREREAVG  
HLA-DQA104:C RPPPPPHDMGP/  
HLA-DRB108:0 SCCQTTCCRTTCC  
HLA-DQA104:C SLKFSPGPCPGPG  
HLA-DQA103:C SSDFNERRERDEK  
HLA-DRB108:0 DRDRERERTREI  
HLA-C05:01 FADIASHPGRL  
HLA-B44:02 KEGHLRVVEFW  
HLA-A02:01 SLASSHLL  
HLA-DQA104:C SCAGAYSSAPAGI  
HLA-DRB104:0 HHCLQTQSLASSI  
HLA-DRB108:0 HLAAKEGHLRVVI  
HLA-A03:01 KQMERQRLAER  
HLA-B57:01 FSALIKKKKT  
HLA-DRB107:0 KKTNLFSALIKKKK  
HLA-DQA102:C KARKQMERQRL/  
HLA-A24:02 IYDFYDLLF  
HLA-B35:02 VPACSHVPL  
HLA-C07:01 VRSSGSRNS  
HLA-C07:01 WRCRSTRLQ  
HLA-B35:02 FAVLGTMMVM  
HLA-C07:01 SRTETPPWR  
HLA-B35:02 MPWPLLLLAV  
HLA-B08:01 SKLNKITSL  
HLA-A24:02 LFFFVAVDIF  
HLA-C07:01 FNYLHSTYL  
HLA-B35:02 EPAAAAAAAI  
HLA-A24:02 AFGGSTAVFSF  
HLA-C07:01 VRIPKEQGS  
HLA-B35:02 VPIDLDPGL  
HLA-B08:01 MLLLLLLGL  
HLA-C07:01 ERESGEPKG  
HLA-B08:01 FFHKKKTA

HLA-B35:02 RPSCGVSSPL  
HLA-C07:01 QRQGREEED  
HLA-B08:01 TALLLLSL  
HLA-C07:01 RREEEDAF  
HLA-C07:01 IRETFHLVSEM  
HLA-B35:02 CAAAAAAACL  
HLA-B35:02 TPLPPSADDNL  
HLA-B08:01 TLKKEKQQDM  
HLA-C07:01 SVTQQQQQS  
HLA-C07:01 KSAPTTKEP  
HLA-B08:01 TLLLLLGGAL  
HLA-C07:01 HTHRANRRW  
HLA-A01:01 LSPQQQQQTY  
HLA-C07:01 HVWAQSPGE  
HLA-B35:02 FPVLLLLLSG  
HLA-C07:01 SAGDEEEED  
HLA-B08:01 LLQEEEEEL  
HLA-B08:01 WGKKKKKKKSQ  
HLA-C07:01 SGAEEEEN  
HLA-C07:01 SKNAADWGW  
HLA-C07:01 EAPPPPPAT  
HLA-A01:01 SSESEEEEEEA  
HLA-C04:01 DDDEEEEG  
HLA-C07:01 HTGPCCCP  
HLA-C04:01 EGEEEGEE  
HLA-C04:01 ELELMPEKA  
HLA-B08:01 QPQQQQQQPP  
HLA-C07:01 LQQQQQQQQQI  
HLA-DQA105:C AVYVEPAAAAAA  
HLA-DQA105:C MMEIACAAAAA/  
HLA-DQA105:C STAVFSFGAATSS  
HLA-DQA105:C GEPKGFHEAAAP,  
HLA-DQA105:C LALLGASAPCGA/  
HLA-DQA105:C TLLLLLGGALAHPI  
HLA-DQA105:C PLLLLAVSGAQT  
HLA-DRB111:0 MILYVSKLNKITSL  
HLA-DRB111:0 HVPMRSARLLTR,  
HLA-DRB111:0 AEFNYLHSTYLRTI  
HLA-DQA105:C VTLSLWPAAPR'  
HLA-DQA105:C DLDPLAIEKAAG:  
HLA-DRB111:0 SPVFFHKKKTAGK  
HLA-DRB111:0 QHCLLGLAKPSLV  
HLA-DRB111:0 IIRETFHLVSEMKI  
HLA-DQA105:C LAWMPKATVQA  
HLA-DQA105:C FYLMELATALLLI  
HLA-DRB111:0 GIIDCVVRIPKEQC  
HLA-DRB111:0 SQEICTLKKEKQQ

HLA-DQA105:C VLLLLLGGDVQSSI  
HLA-DRB111:0 MLLLLLGLRLQL  
HLA-DRB111:0 RGLWRCRSTRLQ  
HLA-DQA105:C AFAGKLPEPSKN  
HLA-DRB111:0 SGCWGGKKKKKKS  
HLA-DQA105:C PQQQQQTYGAIH  
HLA-DQA105:C TCRPSCGVSSPLC  
HLA-DQA105:C LEAITVSAGDEEEI  
HLA-DRB111:0 VVYIFLTLSCGIF  
HLA-DQA105:C EYTVHVWAQSPC  
HLA-DQA105:C EPAPTTTKSAPTT  
HLA-DQA105:C ECLLTPPPSADD  
HLA-DQA105:C QTSGETTHTHRAI  
HLA-DQA105:C QRQQEAPPPPPA  
HLA-DRB111:0 QFTKIKELELMPE  
HLA-DRB104:0 EQQLLQEEEEELQF  
HLA-DQA103:C TMLIHSSSEEEEEI  
HLA-DQA105:C DTPMMVHTGPC  
HLA-DQA103:C QQSQTLSVTQQC  
HLA-DQA105:C DEEEEGGSWGR  
HLA-DRB111:0 KSKAKSKARREEE  
HLA-DQA103:C DCKPRSGAEEEEI  
HLA-DRB111:0 RLAHQQRQGR  
HLA-DRB111:0 ATLQLQQQQQQ  
HLA-DQA105:C QPQQQQQQPPP  
HLA-DQA103:C LGATEEEEEEGEEE  
HLA-DQA103:C DEEEEEEEEEEEEEI  
HLA-A24:02 GYTIRMLWTF  
HLA-B35:02 VPACSHVPL  
HLA-C07:01 RRSCPRRAG  
HLA-C07:01 VRSSGSRNS  
HLA-C07:01 WRCRSTRLQ  
HLA-C07:01 RRRCCRRGL  
HLA-C07:01 GRSPEGQHM  
HLA-C07:01 YRPRPRRY  
HLA-B08:01 EKKSARKRAV  
HLA-B08:01 RLATRLKTSL  
HLA-A24:02 LFFFVAVDIF  
HLA-B35:02 EPAAAAAAAI  
HLA-C07:01 RRVLHIPKP  
HLA-C07:01 VRIPKEQGS  
HLA-B08:01 FFHKKKTA  
HLA-B35:02 RPSCGVSSPL  
HLA-C07:01 IRETFLVSEM  
HLA-A24:02 KFYQWYCW  
HLA-B08:01 TLKKEKQQDM  
HLA-B08:01 MSTKKKCV

HLA-C07:01 SSSGSSSSD  
HLA-C07:01 ESCSFAPTV  
HLA-C07:01 HTHRANRRW  
HLA-C07:01 HVWAQSPGE  
HLA-B08:01 WGKKKKKKSQ  
HLA-C07:01 SKNAADWGW  
HLA-C07:01 TTKEPAPTA  
HLA-C07:01 QQCVTLWTR  
HLA-B08:01 QPQQQQQQPP  
HLA-DQA105:C AVYVEPAAAAAA  
HLA-DRB111:0 LNGIRRVLHIPKPI  
HLA-DRB111:0 MLWTFVQSFKAL  
HLA-DRB111:0 AVLLYKISNLLKFY  
HLA-DRB111:0 HVPMRSARLLTR,  
HLA-DQA105:C RAGSCGRAAPRA  
HLA-DRB111:0 NFWPARLATRLK  
HLA-DRB111:0 RSTYYRPRPRRYV  
HLA-DRB111:0 GRSTYYRPRPRRY  
HLA-DRB111:0 SPVFFHKKKTAGK  
HLA-DQA105:C GGGGGSGSSSGS  
HLA-DRB111:0 QHCLLGLAKPSLV  
HLA-DRB111:0 IIRETFHLVSEMKI  
HLA-DQA105:C TVEASGGGPCPSI  
HLA-DQA105:C LAWMPKATVQA  
HLA-DRB111:0 GIIDCVVRIPKEQC  
HLA-DRB111:0 SQEICTLKKEKQQ  
HLA-DRB111:0 RGLWRCRSTRLQ  
HLA-DQA105:C AFAGKLPEPSKN/  
HLA-DRB111:0 IEELPRRRCCRRGI  
HLA-DRB111:0 SGCWGGKKKKKKS  
HLA-DQA105:C TCRPSCGVSSPLC  
HLA-DQA105:C EYTVHVWAQSPC  
HLA-DQA105:C VTKPNSALESCSF,  
HLA-DRB111:0 GMSTKKKCVHHV  
HLA-DRB111:0 EQEKSRKRAVSI  
HLA-DQA105:C PAPTTKEPAPTAP  
HLA-DQA105:C QTSGETTHTHRAI  
HLA-DRB104:0 CQTHEQQCVTLV  
HLA-DQA105:C QPQQQQQQPPP  
HLA-A24:02 GYTIRMLWTF  
HLA-B08:01 RLKCKACRL  
HLA-B35:02 VPACSHVPL  
HLA-B08:01 LPQVRLSRL  
HLA-A24:02 IWMPGQFTL  
HLA-C07:01 VRSSGSRNS  
HLA-C07:01 WRCRSTRLQ  
HLA-B08:01 LIKKKTA

HLA-C07:01 YRPRPRRY  
HLA-B08:01 KPLKKNLHL  
HLA-B08:01 RLATRLKTSL  
HLA-C07:01 MATTRPRGH  
HLA-C07:01 RRVLHIPKP  
HLA-A24:02 AYAEWGRPPF  
HLA-C07:01 VRIPKEQGS  
HLA-B35:02 VPSASPWGL  
HLA-B35:02 RPSCGVSSPL  
HLA-A24:02 KFYQWYCW  
HLA-B08:01 TLKKEKQQDM  
HLA-C07:01 SSSGSSSD  
HLA-C07:01 CRPCCRPS  
HLA-C07:01 SISGLVRAS  
HLA-C07:01 HVWAQSPGE  
HLA-C07:01 DTLTHPDTL  
HLA-B08:01 WGKKKKKKKSQ  
HLA-C07:01 SKNAADWGW  
HLA-C07:01 TTKEPAPTA  
HLA-C07:01 PQQQQQQQP  
HLA-A01:01 SGCGGCGSGCA  
HLA-A01:01 AVEEEEEEEED  
HLA-DRB111:0 TNLFSAIKKKKT  
HLA-DRB111:0 RPLRHLGRLLGRR  
HLA-DRB111:0 FIAVLKYMATTRP  
HLA-DRB111:0 LNGIRRVLHIPKP  
HLA-DRB111:0 KKKFLIHLRKVDTI  
HLA-DRB111:0 MLWTFVQSFKAL  
HLA-DRB111:0 AVLLYKISNLLKFY  
HLA-DRB111:0 HVPMRSARLLTR  
HLA-DRB111:0 RLCYKQLKSISGLV  
HLA-DRB111:0 NFWPARLATRLK  
HLA-DRB111:0 RSTYYRPRPRRYV  
HLA-DRB111:0 GRSTYYRPRPRRY  
HLA-DQA105:C GGGGGSGSSSGS  
HLA-DRB111:0 FFHFIWMPGQFT  
HLA-DQA105:C LAWMPKATVQA  
HLA-DRB104:0 HLCYYHSQSNRN  
HLA-DRB104:0 IPSLLTDLTHPD  
HLA-DRB111:0 GIIDCVVRIPKEQC  
HLA-DRB111:0 SQEICTLKKEKQQ  
HLA-DRB111:0 RGLWRCRSTRLQ  
HLA-DQA105:C GKRRDGAAYA  
HLA-DQA105:C GSGCGGCGSGCA  
HLA-DQA105:C AFAGKLPEPSKN  
HLA-DRB111:0 SGCWGKKKKKKS  
HLA-DQA105:C TCRPSCGVSSPLC

HLA-DQA105:C EYTVHVWAQSPC  
HLA-DQA105:C PAPTTKEPAPTAP  
HLA-DQA105:C PECQKKVPSASPV  
HLA-DQA103:C YYDYAVEEEEEEE  
HLA-DQA105:C SQQQQQQQQQ  
HLA-DRB104:0 PYCESSCCRPCC  
HLA-DQA103:C PQQQQQQQPQ  
HLA-C07:01 LRPPCPLLV  
HLA-B08:01 RPRGHLLPL  
HLA-A24:02 SYKEPKKITF  
HLA-B08:01 RLATRLKTSL  
HLA-C07:01 LRPGVPESL  
HLA-A24:02 KFYQWYCW  
HLA-C07:01 LRSCGTLFS  
HLA-B08:01 NGIRRVLHI  
HLA-C07:01 QQAETSEEL  
HLA-A01:01 VIDFGQAV  
HLA-C07:01 HVWAQSPGE  
HLA-A01:01 FICKQASCSY  
HLA-C04:01 FMDYLSDKQ  
HLA-A24:02 KNAADWGW  
HLA-DQA105:C ATNMRAAPAPA  
HLA-DRB111:0 LNGIRRVLHIPKPI  
HLA-DRB111:0 AVLLYKISNLLKFY  
HLA-DRB111:0 NFWPARLATRLK  
HLA-DQA105:C ETSEELGAVTVKA  
HLA-DRB111:0 MNTRKYTRTSKA  
HLA-DRB111:0 SPWLLHLGMRST  
HLA-DQA105:C LRSLRPGVPESLAI  
HLA-DQA105:C RKKDSGSKKAVIS  
HLA-DQA105:C AFAGKLPEPSKNA  
HLA-DRB111:0 REDIEFICKQASCS  
HLA-DRB111:0 EREDIEFICKQASC  
HLA-DQA105:C GLRSCGTLFVLP  
HLA-DQA105:C EYTVHVWAQSPC  
HLA-DRB104:0 LQKGISFMDYLSC  
HLA-C05:01 ILDPGQTSW  
HLA-B44:02 REAQQQHLY  
HLA-B27:05 ARWTSTQR  
HLA-C05:01 ISTQQQSHF  
HLA-B44:02 YLNLSAHEY  
HLA-B44:02 NGSFCLPPW  
HLA-B27:05 YMNTNLVRR  
HLA-DRB108:0 YGGLSLSIRAPAR  
HLA-DRB108:0 PEKMKYLNLSAHI  
HLA-DRB108:0 CYMNTNLVRRTS  
HLA-DQA104:C LSDGFVAAEAKTI



HLA-DRB104:0 AQQQHLYRVNIN  
HLA-DRB108:0 DTGLFISTQQQS  
HLA-DRB108:0 NGSFCLPPWPHG  
HLA-B07:02 RPCRRPGRPA  
HLA-A02:01 FASKSMFSL  
HLA-C07:02 TVSKKKQEK  
HLA-DRB115:0 AQRIFASKSMFSL  
HLA-DQA101:C LAAGRSEALQSS  
HLA-DRB113:0 LEPKAVTDQTVSK  
HLA-B44:03 NESTMTSPW  
HLA-B44:03 EEIDGFFARI  
HLA-A11:01 TLSWALSLLR  
HLA-A11:01 RPLASWCPR  
HLA-B44:03 GLWRSATSW  
HLA-B44:03 MEACGTHPT  
HLA-B44:03 EEEEEEEEEEE  
HLA-C04:01 RRRPSQPYQ  
HLA-DRB108:0 LRLYARRRRPSQP  
HLA-DRB108:0 PTLSWALSLLRIPF  
HLA-DRB108:0 EIDGFFARITKSTV  
HLA-DRB108:0 TYSGLWRSATSW  
HLA-DRB108:0 PRTRGLWARCRV  
HLA-DRB108:0 VQKYLLTLMNIVM  
HLA-DQA102:C PKKSNGMEACGT  
HLA-DQA102:C EEEGEEEEEEEEEEI  
HLA-B08:01 TPKKKRSAF  
HLA-B08:01 MFIKRWKPA  
HLA-B08:01 SLRKRQKF  
HLA-B57:01 LACSHVPMW  
HLA-C07:01 WRRCRSTRLQ  
HLA-B57:01 QIFFFHFIW  
HLA-B57:01 KVSFRVDW  
HLA-A01:01 YFDYDLLF  
HLA-B08:01 FNHKKQQQV  
HLA-B57:01 GSTAVFSF  
HLA-C07:01 ERLQRERAP  
HLA-B57:01 RSKGLVLY  
HLA-C07:01 SSSGGSSGN  
HLA-B08:01 RPSCGVSSPL  
HLA-C07:01 CRPCCRPS  
HLA-C07:01 GSYGSGGGS  
HLA-C06:02 PAEEAPSEV  
HLA-B57:01 LTTCCRTCC  
HLA-A01:01 SGCGGCGSGCA  
HLA-DRB115:0 VIKHPLIFRINLRR  
HLA-DRB107:0 EAQRIFASKSMFS  
HLA-DRB107:0 GVRILKLCVKVSFF

HLA-DRB107:0 WSARLLTQSPGM  
HLA-DRB107:0 STAVFSFGAATSS  
HLA-DRB107:0 QRERGLWRCRST  
HLA-DRB115:0 RSKGLVLYVSPPO  
HLA-DRB107:0 IFFFHFIWMPGQI  
HLA-DRB107:0 DVVYIFLTLSCLGII  
HLA-DRB107:0 PTTTTTTTTTTTTI  
HLA-DRB107:0 ETPKKKRSAPSR:  
HLA-DQA101:C GKISTITPQIQAFN  
HLA-DQA102:C EVQPPPAEEAPSE  
HLA-DQA102:C RPSCGVSSPLCCC  
HLA-DQA102:C GRGSYSGGGSY  
HLA-DQA101:C SCCLTTCRRTCCI  
HLA-DRB107:0 REERERLQRERAF  
HLA-DQA102:C DNNNGSSSGGSS  
HLA-DQA101:C SCCQTTCCRTTCC  
HLA-DQA102:C GSGCGGCGSGCA  
HLA-C06:02 YRRNLCHLL  
HLA-B08:01 HLRAKKYSV  
HLA-B08:01 RLKCKACRL  
HLA-C07:01 YRPRPRRY  
HLA-B57:01 ISNQMMTF  
HLA-B57:01 TAGVPCQRW  
HLA-B57:01 ASTSLSSDW  
HLA-B57:01 RLLAETCW  
HLA-B57:01 KVSFRVDW  
HLA-B08:01 LWRCRSTRL  
HLA-B57:01 AAMPYLPQGSW  
HLA-C07:01 FNHKKQQQV  
HLA-C07:01 LRQQQQLL  
HLA-C07:01 IYDFYDLL  
HLA-B57:01 RSKGLVLY  
HLA-B08:01 SPMKKKTEE  
HLA-C07:01 NHHHHNHHS  
HLA-B57:01 KEKQQDMRW  
HLA-B57:01 GSTAVFSF  
HLA-B08:01 FFHKKKTA  
HLA-C06:02 FAQYNSYV  
HLA-C07:01 ERLQRERAP  
HLA-C07:01 CRPSCGVSSPL  
HLA-B57:01 MTVAGPRGGI  
HLA-A01:01 GSYSGGGSY  
HLA-C07:01 SSSGGSSGN  
HLA-C07:01 CRPCCRPS  
HLA-B57:01 HTGPCCCCPCC  
HLA-C07:01 PAEEAPSEV  
HLA-B57:01 LTTCCRTTCC

HLA-C07:01 TVSKKKQEK  
HLA-C07:01 EAAPARPRP  
HLA-C07:01 CSSGGCCSS  
HLA-C07:01 EDDDDDDVV  
HLA-A01:01 SSESEEEEEEA  
HLA-A01:01 ASDCCLCCCCG  
HLA-A01:01 EEEGEEEEEGEE  
HLA-A01:01 QPDEEEEEEEK  
HLA-DRB107:0 GVRILKLC SKVSFF  
HLA-DQA101:C LCGMREVRVVA  
HLA-DRB107:0 STAVFSFGAATSS  
HLA-DQA101:C DSWALSLRAQAL  
HLA-DRB107:0 QRERGLWRCRST  
HLA-DRB115:0 RSKGLVLYVSPPO  
HLA-DRB107:0 AERHFDHLRAKK  
HLA-DRB107:0 FLIHLRKVDTHHL  
HLA-DQA101:C RQQQQLLSAIIEA  
HLA-DRB107:0 DVVYIFLTLSCGLII  
HLA-DRB115:0 STDFAQYNSYVGI  
HLA-DQA102:C EYFIRLEEAAPARF  
HLA-DRB107:0 GYFPLSHPMTVAV  
HLA-DRB107:0 RGRSTYYRPRPRF  
HLA-DQA102:C REGQAVDASTSL  
HLA-DQA101:C GKISTITPQIQAFN  
HLA-DQA102:C GTANTTTAGVPC  
HLA-DQA101:C TCTPISNQMMTF  
HLA-DRB115:0 VRKNLSPVFFHKK  
HLA-DQA102:C EDDDDDDVVFFIE  
HLA-DQA102:C KQQDMRWVEQI  
HLA-DRB107:0 KKKEACFKRLLAE  
HLA-DQA102:C TMLIHSSSEEEEE  
HLA-DQA102:C EVQPPPAEEAPSE  
HLA-DQA102:C RPSCGVSSPLCCC  
HLA-DRB107:0 KEKHKTHPSNHH  
HLA-DQA101:C PVSSCCSVSSGGC  
HLA-DQA102:C LEPKAVTDQTVSK  
HLA-DQA102:C YTCLASDCCLCCC  
HLA-DQA101:C DTPMMVHTGPC  
HLA-DQA102:C GRGSYSGGGGSY  
HLA-DQA101:C SCCLTTCCRTTCCI  
HLA-DRB107:0 REERERLQRERAF  
HLA-DQA102:C DNNNGSSSGGSS  
HLA-DQA101:C SCCQTTCCRTTCC  
HLA-DQA102:C DEEEEEEEKVSQP  
HLA-DQA102:C VVQQQQQQQQQ  
HLA-DQA102:C EEEREQGEQGETI  
HLA-DQA102:C LGATEEEEEEGEEE

|            |             |
|------------|-------------|
| HLA-B57:01 | KSLCHCDRW   |
| HLA-B57:01 | HSGNSSESW   |
| HLA-B08:01 | IMKKMRRPV   |
| HLA-B08:01 | KLKPYRSVL   |
| HLA-B57:01 | LACSHVPMW   |
| HLA-B57:01 | ASTSLSSDW   |
| HLA-B57:01 | SSQETPNYSW  |
| HLA-C07:01 | WRCRSTRLQ   |
| HLA-B08:01 | YTKERKLL    |
| HLA-B08:01 | EPKKSILPL   |
| HLA-A01:01 | LSEKKNYALY  |
| HLA-B08:01 | LPSCKKKLL   |
| HLA-A01:01 | YDFDYDLLF   |
| HLA-C06:02 | RRKEGPNSN   |
| HLA-C06:02 | WSKEREREA   |
| HLA-B57:01 | GSTAVFSF    |
| HLA-C07:01 | ERLQRERAP   |
| HLA-B57:01 | RSKGLVLY    |
| HLA-C07:01 | LRQQQQLLS   |
| HLA-C07:01 | ERESGEPKG   |
| HLA-C07:01 | YRRAISKKR   |
| HLA-C07:01 | SYVGCQRGS   |
| HLA-B08:01 | ELNYVPLAL   |
| HLA-B08:01 | SGFLKFFFL   |
| HLA-A01:01 | YFFFLFHMV   |
| HLA-C07:01 | IRETFHLVSEM |
| HLA-A01:01 | AQDDHLTQY   |
| HLA-C07:01 | EREQGEQGE   |
| HLA-B57:01 | ITAFFLLDI   |
| HLA-C07:01 | SSSGGSSGN   |
| HLA-B08:01 | RPSCGVSSPL  |
| HLA-C07:01 | AKNGCKQDN   |
| HLA-B57:01 | TTTSSTTTI   |
| HLA-C07:01 | CRPCCCRPS   |
| HLA-C07:01 | GSYGSAGGS   |
| HLA-C07:01 | ATTSQPSR    |
| HLA-A01:01 | LSPQQQQQTY  |
| HLA-C06:02 | NVFLVCLIL   |
| HLA-C07:01 | CSSGGCCSS   |
| HLA-B57:01 | HTGPCCCPCC  |
| HLA-B08:01 | NLKSKYFAVC  |
| HLA-C07:01 | SAGDEEEED   |
| HLA-C07:01 | DTLTHPDTL   |
| HLA-B08:01 | LLQEEEEEL   |
| HLA-C07:01 | PSNHHHHNH   |
| HLA-A01:01 | AVDDDDDDAA  |
| HLA-B08:01 | TPKKKKKDPN  |

HLA-C07:01 VHLGCVCGQ  
HLA-B08:01 FIYIIFFS  
HLA-C07:01 CQLAKKTK  
HLA-A01:01 EMDVCNAFFS  
HLA-B57:01 KAKSPEKAKS  
HLA-B57:01 YACKKLQKKE  
HLA-A01:01 NQDDDDDDGGF  
HLA-A01:01 VSEDEDDDDDA  
HLA-C07:01 EEEEEEGEE  
HLA-A01:01 SGCGGCGSGCA  
HLA-DRB115:0 AKKLPYRSVLVLI  
HLA-DRB115:0 VAKKLPYRSVLV  
HLA-DRB115:0 KKLKPYRSVLVLIK  
HLA-DRB107:0 GLYFSNLKSKYFA'  
HLA-DRB107:0 QIDVKISSVNVIIV  
HLA-DRB107:0 WSARLLTQSPGM  
HLA-DRB107:0 STAVFSFGAATSS  
HLA-DRB107:0 QRERGLWRCRST  
HLA-DRB115:0 RSKGLVLYVSPPQ  
HLA-DRB107:0 HRQLLYITAFFLLC  
HLA-DRB115:0 LGQIIMKKMRRP'  
HLA-DRB107:0 IRETFHLVSEMKN  
HLA-DRB107:0 TSSVSTTTSTTTT  
HLA-DQA102:C GEPKGFHEAAAP.  
HLA-DQA101:C RQQQQLLSAIEA  
HLA-DQA102:C DFSKFGAGILEVFI  
HLA-DRB107:0 DVVYIFLTLSCGLII  
HLA-DRB107:0 PTTTTTTTTTTTTI  
HLA-DQA101:C LEAITVSAGDEEEI  
HLA-DRB115:0 STDFAQYNSYVG(  
HLA-DQA102:C RNQAIYAAVDDD  
HLA-DRB107:0 DAQEYRRAISKKR  
HLA-DQA102:C REGQAVDASTSL'  
HLA-DRB107:0 GHTQPSQVSTWF  
HLA-DQA101:C AIVEEEMFLVMG  
HLA-DRB115:0 GEDCYFFFLFHM'  
HLA-DRB107:0 YPLSEKKNYALYV  
HLA-DRB115:0 VVLPSCKKKLLKL  
HLA-DRB107:0 KTTLPTLNVLVCI  
HLA-DRB107:0 PLLFRALVHLGCV  
HLA-DQA102:C ASERTALSPQQQ(  
HLA-DRB107:0 VGFSSILFIYIIFFS  
HLA-DQA102:C TTDNATTTSQPSF  
HLA-DQA102:C EEFISEMDVCNAF  
HLA-DQA102:C LGSARRAAGSDA  
HLA-DRB115:0 DTSVFLNWNPE  
HLA-DQA101:C SEVSKLRCQLAKK

HLA-DRB107:0 PSLLTLDLTHPD  
HLA-DQA102:C RPSCGVSSPLCCC  
HLA-DRB107:0 KEKHKTHPSNHH  
HLA-DQA101:C PVSSCCSVSSGGC  
HLA-DQA102:C ITEHEVAQDDHLI  
HLA-DQA102:C EWSKEREREAVG  
HLA-DRB115:0 ATGKMYACKKLO  
HLA-DQA102:C IDEVIYPCPVEPKK  
HLA-DQA102:C QLRKEQQLLQEEI  
HLA-DQA102:C EDDDDDATPPPV  
HLA-DRB115:0 KNGCKQDNSLYR  
HLA-DQA101:C DTPMMVHTGPC  
HLA-DQA102:C GRGSYSGGGGSY  
HLA-DRB107:0 REERERLQRERAF  
HLA-DQA102:C DNNNGSSSGGSS  
HLA-DQA101:C SCCQTTCCRTTCC  
HLA-DQA102:C QDDDDDDDDGFFI  
HLA-DQA102:C GSGCGGCGSGCA  
HLA-DQA102:C EEEREQGEQGETI  
HLA-DQA102:C LGATEEEEEEGEEE  
HLA-DQA102:C AKSPEKAKSPEKA  
HLA-DQA102:C KNRRKEGPNSNR  
HLA-DRB115:0 DMGKKPKTPKKK  
HLA-C06:02 FAQYNSYV  
HLA-DRB115:0 STDFAQYNSYVGI  
HLA-A31:01 RGRPRGAGR  
HLA-A01:01 EDDDDDDDDDEL  
HLA-DRB114:5 KRLLRLQQERGK  
HLA-DQA101:C CVFLDEDDDDDD  
HLA-B07:02 RPTGAWSSM  
HLA-C07:02 FLPDQIRDL  
HLA-B07:02 LPLLLLLLLLP  
HLA-DRB111:0 LETIIKSLKSTQDEI  
HLA-DRB111:0 PLLLLLLLLPAPELC  
HLA-DRB111:0 YLLWVFLPDQIRC  
HLA-B07:02 KPRAQNLPPV  
HLA-C03:03 GALGVLLAL  
HLA-C03:03 MSSCLQSPPL  
HLA-C07:02 RRFSGRLSGRL  
HLA-B07:02 KPASWAQRRI  
HLA-C03:03 VDYKKNNTGI  
HLA-B07:02 GPGKGIPVGGG  
HLA-DRB101:0 RGALGVLLALGA/  
HLA-DRB101:0 RRRFSGRLSGRLG  
HLA-DRB101:0 LKFQMSSCLQSPF  
HLA-DRB101:0 QLCIPPLNSKPASI  
HLA-DRB101:0 GDKGKPRAQNLFP

HLA-DRB101:0 LSTPGPGKGIPVG  
HLA-DRB101:0 GPADGEVDYKKN  
HLA-C03:03 AASAHGRPL  
HLA-B07:02 SPAWSRGAA  
HLA-B07:02 RPHPRGSPA  
HLA-C03:03 SGSGSGSGA  
HLA-C07:02 VKEDFIQQR  
HLA-B07:02 GPGKGIPVGGG  
HLA-DRB101:0 EQGFRRPAAAAS.  
HLA-DRB101:0 KEDFIQQRNVSCF  
HLA-DRB101:0 PKAGFLPRPSGA/  
HLA-DQA101:C SGSGSGSGASSPF  
HLA-DRB101:0 LSTPGPGKGIPVG  
HLA-A02:01 VLGRELLLLV  
HLA-A02:01 ILGKLILLST  
HLA-C07:02 VKEDFIQQR  
HLA-C07:02 DKSRSSRSP  
HLA-B07:02 GPGKGIPVGGG  
HLA-C07:02 GAKTKKKKN  
HLA-B07:02 GPEEEEEEEED  
HLA-DRB101:0 LGKLILLSTQNGSF  
HLA-DRB101:0 KEDFIQQRNVSCF  
HLA-DRB101:0 NEVLGRELLLLVQ  
HLA-DRB101:0 PQGDKSRSSRSPF  
HLA-DRB101:0 SPGIPAGAKTKKK  
HLA-DRB101:0 LSTPGPGKGIPVG  
HLA-DQA101:C SKKAGPEEEEEEE  
HLA-C03:03 AASVTKGTL  
HLA-B15:01 LQQQQQVVQL  
HLA-A02:01 ILGKLILLST  
HLA-C07:02 VKEDFIQQR  
HLA-C07:02 GAKTKKKKN  
HLA-B07:02 PPQQQQQQQPP  
HLA-A01:01 EEEEEEEEEEE  
HLA-DRB101:0 LGKLILLSTQNGSF  
HLA-DRB101:0 KEDFIQQRNVSCF  
HLA-DQA101:C PGRTTAASVTKG  
HLA-DQA101:C TRISKMELQQQQ  
HLA-DRB101:0 SPGIPAGAKTKKK  
HLA-DRB101:0 PQQQQQQQPPC  
HLA-DQA101:C EEEGEEEEEEEEEEI  
HLA-A02:01 ILMNCRMYS  
HLA-C06:02 SRDQMFREQ  
HLA-A02:01 SMPCWTTARRLI  
HLA-DRB114:5 PNALTLILMNCRM  
HLA-DRB114:5 SSSMPCWTTARRL  
HLA-DRB113:0 KGLDWWKEEAPC

HLA-C08:02 ARDEAEWNI  
HLA-A24:02 VRATGGFLF  
HLA-B35:01 LPPPKMPPPR  
HLA-DRB101:0 SIKAVRATGGFLFI  
HLA-DRB101:0 TTLTPLPPPKMPP  
HLA-DRB101:0 WYAEHRGRARDI  
HLA-B39:01 IHIWAKFSAI  
HLA-C12:03 RTRPKPCTW  
HLA-C12:03 NATTTSQPSRM  
HLA-B39:01 GPLLLLLLVL  
HLA-C12:03 MRFQPGDNC  
HLA-DRB116:0 RLQDWIHIWAKF  
HLA-DRB116:0 PLLLLLLVLPPRAL  
HLA-DQA101:C LLSAVKLLCMRFC  
HLA-DQA101:C SNQKRGVKVLKQ  
HLA-DQA101:C TTDNATTTSPSF  
HLA-A02:02 YQVAEACSI  
HLA-C03:04 SASPRSSSF  
HLA-C03:04 IPYRPNPPPPL  
HLA-A02:02 RGRCGKDWL  
HLA-C16:01 QGDKSRSSR  
HLA-DRB111:0 SQTPLLRSRALVK  
HLA-DRB111:0 PPLSFLQVVRPTC  
HLA-DQA105:C ACSIWSPGSVSTC  
HLA-DRB111:0 LWQRLRDAFPED  
HLA-DQA105:C GDKSRSSRSPPGK  
HLA-A02:02 FLAQEILRL  
HLA-A02:02 YVHIITRFPL  
HLA-A02:02 ITSENPDEV  
HLA-B44:03 NEHGSYRYF  
HLA-A02:02 RIIERLLRSPI  
HLA-B44:03 AETPARDGG  
HLA-B44:03 HERPVLPPH  
HLA-DRB111:0 YSRIIERLLRSPITS  
HLA-DRB111:0 QDLPYVHIITRNL  
HLA-DRB111:0 LPPNIRELLPFRTV  
HLA-DRB111:0 YRYFLTGLGRIEL  
HLA-DQA105:C TPARDGGKAAAS  
HLA-DRB111:0 QLIMTFHERPVLF  
HLA-DRB111:0 HVIAARITSENPDI  
HLA-C07:01 YYRPRPRRY  
HLA-B08:01 LWRCRSTRL  
HLA-C07:01 ERQRLAREN  
HLA-A11:01 RQQQQQQQQQ  
HLA-C07:01 GSGSGSGSG  
HLA-DRB107:0 QRERGLWRCRST  
HLA-DRB107:0 RGRSTYYRPRPRF



HLA-DQA105:C SGSGSGSGSSSS  
HLA-DQA105:C KARKQMERQRL/  
HLA-DQA102:C RKQQQRQQQC  
HLA-A68:01 HAAALGCK  
HLA-A68:01 HSAAGWPPDQK  
HLA-B08:01 CLCTRWSC  
HLA-C07:02 DKSRSSRSP  
HLA-B08:01 FLLLLLLLLP  
HLA-B08:01 GKGGGGGGGGE  
HLA-DQA105:C RDDAAMRAHAA  
HLA-DRB107:0 IKTSRVFIRDCAW  
HLA-DQA105:C QSHLHSAAGWPF  
HLA-DRB107:0 PLLLLLLLLPRGI  
HLA-DQA105:C KGGGGGGGGES(  
HLA-DRB107:0 PPQGDKSRSSRSF  
HLA-C06:02 SRKGRSRGA  
HLA-B18:01 RQQQQQQQQR(  
HLA-DQA102:C QQQQRQQQQQ(  
HLA-DQA102:C SGSGGKLPSRKG  
HLA-B58:01 WSSSSRPW  
HLA-A11:01 STYYRPRRR  
HLA-DRB116:0 RSTYYRPRRRYV  
HLA-DRB116:0 TRSFWSWSSSRI  
HLA-A24:02 IYDFYDLLF  
HLA-A26:01 MSWRGRSTYY  
HLA-DRB112:0 IIVILLVDDVYIFL  
HLA-DRB114:5 GRSTYYRPRRRY  
HLA-C07:01 WRCSVPRGT  
HLA-C07:01 SSGSSSSN  
HLA-DRB101:0 GAELGEAGAARP  
HLA-DRB101:0 SSSGSSGSSSSN(  
HLA-B08:01 LAKRVRVCL  
HLA-C07:01 LRFGTWTQAL  
HLA-C08:02 KAQEIYEKI  
HLA-DRB103:0 LSEILRLAKRVRVC  
HLA-DRB103:0 GSPVTTSAPLRRI  
HLA-DQA105:C LELNFHKAQEIYEI  
HLA-C07:01 FRELPLRSWSL  
HLA-DRB107:0 NPAGFRELPLRSV  
HLA-DQA102:C QQQQQQQQQQ  
HLA-A02:01 LLCSFRHPV  
HLA-B44:02 QEHGEATRDW  
HLA-B44:02 CEKEAAPGW  
HLA-A02:01 KMMRCKRYQT  
HLA-B44:02 VEPAAAAAAAI  
HLA-A23:01 VFVRPNSCM  
HLA-DRB107:0 LLCSFRHPVSTRLI

HLA-DQA102:C YVEPAAAAAAIS  
HLA-DQA102:C LPALAGAAAHA  
HLA-DRB107:0 KLKVFVRPNSCM  
HLA-DRB107:0 ACRAAGAHGSRC  
HLA-DRB107:0 TKSPCESNNKKM  
HLA-C12:03 YQMRPSIIFL  
HLA-C08:02 WIDSLQAFSL  
HLA-C12:03 LGIPHVACY  
HLA-C08:02 FEDSSSSGE  
HLA-C12:03 LSAEAPTSPCL  
HLA-C12:03 SLSPSSDCLV  
HLA-A03:01 HTTTTTNR  
HLA-C12:03 TPKKKKKDP  
HLA-DQA105:C ASSNSSGSLSPSS  
HLA-DQA105:C MVWLQYGQAGH  
HLA-DQA105:C SQQPLSAEPTSF  
HLA-DQA105:C TLRWLLGIPHVAC  
HLA-DQA101:C QLMNTWIDSLQ/  
HLA-DQA105:C TVFEDSSSSGESSI  
HLA-DQA105:C HTTTTTNRPGTTF  
HLA-DRB113:0 PKKKKKDPNEPQ  
HLA-A31:01 RMSWRGGCCR  
HLA-A31:01 KLMLLRLNLR  
HLA-A31:01 RTPTWTPR  
HLA-A02:01 FIMVGVQGL  
HLA-C07:01 ERGQQPSCL  
HLA-A31:01 ILGEPDPHQR  
HLA-A02:01 RQQEAPPPPPA  
HLA-DQA103:C SGSWETLWAE  
HLA-DRB104:0 QKKLMLLRLNLR  
HLA-DRB104:0 RHSSFIMVGVQG  
HLA-DRB104:0 KRPVILGEPDPH  
HLA-DRB104:0 QSLLATCVGSISEL  
HLA-DQA103:C EKQMREEAERTR  
HLA-DQA103:C APPPPPATTQNY  
HLA-C12:03 AAAAAAYL  
HLA-C12:03 DACGRRPQL  
HLA-C12:03 LKHKKRPR  
HLA-C12:03 QQEEEEED  
HLA-DQA105:C QEEEEAAAAAA  
HLA-DQA105:C QLGLRAGIPPTAL  
HLA-DRB111:0 HSVQPLLKHKKR  
HLA-DRB111:0 YHHHHHHHHHH  
HLA-DQA105:C QEEEEEDSRDEC  
HLA-B44:02 MELQQQQQV  
HLA-C15:02 RSTRLQESQ  
HLA-B51:01 LPQQQQQP

HLA-C05:01 QQQQHQQQ  
HLA-C05:01 QPQQQQQP  
HLA-DRB107:0 QRERGLWRCRST  
HLA-DQA101:C TRISKMELQQQQ  
HLA-DQA102:C QQRQQQLPQC  
HLA-DQA102:C QPQAPQPQQC  
HLA-DQA102:C QQQQHQQQ  
HLA-A30:02 SSSSSSSGY  
HLA-C07:01 WRCRSTRLQ  
HLA-B15:03 VGIHLSLSI  
HLA-B15:03 QQQHQQQQ  
HLA-C07:01 QRQQQQQQQ  
HLA-B35:01 QPQQQQQP  
HLA-C07:01 ETTNKQTS  
HLA-B15:03 PQQQQQPQ  
HLA-DQA105:1 SGGYKGGSSSS  
HLA-DRB111:0 RGLWRCRSTRLQ  
HLA-DRB109:0 ICLVGIHLSLSIGLK  
HLA-DQA105:1 QPQQQQQP  
HLA-DQA103:C PQQQQQPQ  
HLA-DQA105:1 VNKETTVEKETT  
HLA-DRB111:0 RQQQQQQQR  
HLA-DRB111:0 RQQQQQQQ  
HLA-DQA105:1 QQQQHQQQ  
HLA-A68:02 ETYRLISTIA  
HLA-A68:02 QVTYLASPA  
HLA-C08:02 GEEEEEEYE  
HLA-DRB101:0 ICLRETYRLISTIAI  
HLA-DRB101:0 RTQVTYLSPARC  
HLA-DQA101:C GCAWTLEGEEEE  
HLA-DRB101:0 VVQQQQQQQ  
HLA-C08:02 ILSVIGEF  
HLA-C08:02 TGDEEEEDG  
HLA-DRB101:0 CKIILSVIGEFQP  
HLA-DQA101:C EIQEVQITGDEEE  
HLA-DRB101:0 VVQQQQQQQ  
HLA-B07:02 LPSKFKNSM  
HLA-C07:02 IYDDDVSPF  
HLA-C07:01 RRYQKKRQP  
HLA-C07:01 LRQQQQLL  
HLA-B07:02 QPSQQQLLQEL  
HLA-B07:02 AAAAAAAAAA  
HLA-C07:02 DKSRSSRSP  
HLA-A03:01 LQQQQQQQQ  
HLA-DQA104:C SSPSAAAAAAAAA  
HLA-DRB108:0 AGCSFAIRRYQKK  
HLA-DRB108:0 KLPSKFKNSMRS

HLA-DQA101:C RQQQQLLSAIEA  
HLA-DQA104:C IYDDDVSPFLEGLI  
HLA-DQA101:C GSMEASVQQPSC  
HLA-DQA101:C LQLQLQQQQQQ  
HLA-DRB108:0 GDKSRSSRSPPGK  
HLA-A02:01 WLLDLTPGL  
HLA-C07:01 MRRNFSMGM  
HLA-B07:02 LPSKFKNSM  
HLA-A02:01 ALPACVVCL  
HLA-B07:02 VPTRARCCL  
HLA-B07:02 EPCGMSRSSL  
HLA-A02:01 AQQQQQHPV  
HLA-A02:01 MLVKKEEEEEES  
HLA-C07:02 DKSRRSRSP  
HLA-DRB108:0 LKMRRNFSMGM  
HLA-DRB108:0 KLPSKFKNSMRS  
HLA-DRB108:0 LQFVVMACPPKA  
HLA-DQA101:C LSRNQLSALPACV  
HLA-DQA104:C SGGGSAETA  
HLA-DQA101:C PCGMSRSSLQTS  
HLA-DRB108:0 KEEEEESHRIKKL  
HLA-DRB108:0 AQQQQQHPVLH  
HLA-DRB108:0 GDKSRSSRSPPGK  
HLA-DQA101:C RRRQQQQQQQC  
HLA-A02:01 LLLGEPGQRV  
HLA-B44:02 TEQIQCWPIY  
HLA-B44:02 SEIYEAGAPM  
HLA-A24:02 YRPRPRRY  
HLA-A02:01 SQFSTLKKT  
HLA-B44:02 EEEEEEEEEEE  
HLA-DQA105:C SEIYEAGAPMAA  
HLA-DQA105:C TRCWGVMSANP  
HLA-DRB104:0 ECGKAFSQFSTLK  
HLA-DRB104:0 FWEIYKMTTEQIC  
HLA-DQA105:C MSWRGRSTYYRF  
HLA-DQA105:C EEEGEEEEEEEEEEI  
HLA-B44:02 AEFRPSSRPW  
HLA-B44:02 TEQIQCWPIY  
HLA-A24:02 RYKRWPGAW  
HLA-A02:01 RMRPASWHA  
HLA-C05:01 ASSRRAAAT  
HLA-B18:01 CELLNRFQT  
HLA-A02:01 SQFSTLKKT  
HLA-DQA105:C SGSVHGGGRSAA  
HLA-DQA105:C RGPSSGTAASSR  
HLA-DQA105:C RASADFGAAGSP  
HLA-DRB104:0 ECGKAFSQFSTLK

HLA-DRB104:0 FWEIYKMTTEQIC  
HLA-DQA105:C MRPASWHAPRP  
HLA-DRB104:0 PTTTTTTTTTTTTI  
HLA-DRB104:0 LLEKQACELLNRF  
HLA-B41:02 SEKEIKITL  
HLA-C08:02 GPDSLGLTV  
HLA-A32:01 ITVGPWASF  
HLA-B14:02 THKRIHTGE  
HLA-DQA105:C GRLPSSAGAAGA  
HLA-DRB101:0 LQQFCISSSGKMS  
HLA-DRB111:0 SSHLTTHKRIHTG  
HLA-DQA105:C DTAGRSGTGPSQ  
HLA-B41:02 MEKLLRLLL  
HLA-B41:02 SEKEIKITL  
HLA-C08:02 VAGITGMSH  
HLA-C08:02 PAAKPAAGA  
HLA-DRB101:0 AILLQLSGAWRLL  
HLA-DQA105:C AAKPAAGAPPAK  
HLA-DRB101:0 LQQFCISSSGKMS  
HLA-DQA105:C PASASQVAGITGM  
HLA-B41:02 SEKEIKITL  
HLA-B41:02 WEKRKHFYM  
HLA-B41:02 EEVTTTTTI  
HLA-C08:02 QVTCSLTPL  
HLA-B14:02 RRKKRTER  
HLA-DRB101:0 RKHFYMKINNLRI  
HLA-DRB101:0 LQQFCISSSGKMS  
HLA-DRB101:0 GVHLQELLVGA  
HLA-DRB111:0 VTTTTTITEKHKL  
HLA-DRB111:0 AKEWRNRRKKRF  
HLA-B41:02 SEKEIKITL  
HLA-A32:01 TLLATQTPW  
HLA-A32:01 ALPRWSSPW  
HLA-B41:02 FERTVEALYV  
HLA-B41:02 LEWLHLHL  
HLA-C08:02 GGDVTELPA  
HLA-B41:02 EEVTTTTTI  
HLA-C08:02 CTDGSSRL  
HLA-B41:02 SELFQGHKKV  
HLA-B41:02 QEGLGYRSAPS  
HLA-C08:02 INGSNLQPV  
HLA-DRB101:0 KLEWLHLHLSRRL  
HLA-DRB111:0 QVQLRNFLNLRKI  
HLA-DQA105:C TQEPVLGAPAAFI  
HLA-DRB101:0 LQQFCISSSGKMS  
HLA-DRB111:0 LQPVRSFLQPPKF  
HLA-DRB111:0 SELFQGHKKVSRK

HLA-DRB101:0 KFACFERTVEALY'  
HLA-DQA105:C RDQEGLGYRSAP:  
HLA-DQA105:C LPAGRWSTSLTA(  
HLA-DRB111:0 VTTTTTITEKHKLN  
HLA-DQA105:C PASPSGPRGVPGI  
HLA-B07:02 SPPARRASM  
HLA-B07:02 WPNFILRML  
HLA-B35:01 SASWASCAW  
HLA-C07:02 SRTLPSPIRCL  
HLA-A03:01 EIDPPTIIK  
HLA-DRB115:0 NFILRMLKRSWFI  
HLA-DQA101:C PARRASMAALSLI  
HLA-DQA101:C SLLICVAAVACSPF  
HLA-DRB115:0 YPTFSRTLPSPIRC  
HLA-DRB113:0 KTKQEIDPPTIIKG  
HLA-B07:02 APRGPRRSQ  
HLA-B07:02 WPNFILRML  
HLA-A03:01 ASSCSTSVTK  
HLA-A03:01 AQWRRRSWK  
HLA-C07:02 SRTLPSPIRCL  
HLA-A03:26 KLAQQIQK  
HLA-B07:02 SPAGACLLLLS  
HLA-DRB115:0 QELIVILKSMPPIE/  
HLA-DRB115:0 NFILRMLKRSWFI  
HLA-DQA101:C YTFSPAGACLLLLS  
HLA-DRB115:0 YPTFSRTLPSPIRC  
HLA-DQA101:C LAEDGVLSPLALT  
HLA-DQA101:C RSRCGHAICLRPS  
HLA-DQA101:C QHRTRLRQILDW  
HLA-A03:01 KLRPVSSYK  
HLA-B07:02 WPNFILRML  
HLA-A03:01 AQWRRRSWK  
HLA-C07:02 SRTLPSPIRCL  
HLA-A03:26 KLAQQIQK  
HLA-B07:02 PPAPPPHL  
HLA-B07:02 QPPSSSSST  
HLA-C07:02 VKANQKKHL  
HLA-B07:02 RGGGYGGDRS  
HLA-DRB115:0 QELIVILKSMPPIE/  
HLA-DRB115:0 NFILRMLKRSWFI  
HLA-DRB115:0 YPTFSRTLPSPIRC  
HLA-DQA101:C LAEDGVLSPLALT  
HLA-DRB113:0 DDIVKANQKKHLI  
HLA-DRB115:0 EEKLRPVSSYKPKI  
HLA-DRB115:0 ELVGYRQPPSSSS  
HLA-DQA101:C TSVPRSVPPAPPP  
HLA-DRB115:0 RGGGYGGDRSSC

HLA-B07:02 WPNFILRML  
HLA-C07:02 SRTLPSPIRCL  
HLA-A03:26 KLAQQIQK  
HLA-DRB115:0 QELIVILKSMPIIE/  
HLA-DRB115:0 NFILRMLKRSWFI  
HLA-DRB115:0 YPTFSRTLPSPIRC  
HLA-A03:01 MMANLWWSMK  
HLA-B07:02 HPRGTGRCW  
HLA-B07:02 WPNFILRML  
HLA-A03:01 TTCCRTTCWK  
HLA-A03:01 AQWRRRSWK  
HLA-B07:02 HPHHHPRHA  
HLA-C07:02 SRTLPSPIRCL  
HLA-A03:26 KLAQQIQK  
HLA-B35:01 MADGGGGGTG  
HLA-DRB115:0 QELIVILKSMPIIE/  
HLA-DRB115:0 NFILRMLKRSWFI  
HLA-DQA101:C DSKMMANLWWS  
HLA-DRB115:0 YPTFSRTLPSPIRC  
HLA-DRB115:0 SVMMEYFPTTRFSF  
HLA-DQA101:C LAEDGVLSPLALT  
HLA-DRB115:0 PHHLHHHHHPHF  
HLA-DQA101:C TTCCRTTCWKPT  
HLA-DQA101:C ADGGGGGTGAV/  
HLA-A02:05 KLFGGKKVSV  
HLA-B50:01 RELPAAAAAAV  
HLA-A02:05 MLWGQELL  
HLA-A02:05 GIPECAVSL  
HLA-A02:05 VLPAQFRA  
HLA-DQA105:C ARELPAAAAAAV/  
HLA-DRB111:0 RLKKTAMKLFGGI  
HLA-DQA105:C VAGPRGGIPECAV  
HLA-DRB111:0 QEHIRFIDNMLW  
HLA-DRB111:0 PLPTVLPQFRAA  
HLA-C07:01 AAAAAAYL  
HLA-DQA101:C QQEEEEAAAAAA  
HLA-A02:01 KLGRRCDFML  
HLA-DRB115:0 RRCDFMLRKT  
HLA-A02:01 GLGNLILKNEV  
HLA-A02:01 GIPECAVSL  
HLA-C07:01 RHDDDDDDI  
HLA-C07:01 GRKFQQQTN  
HLA-B08:01 EAKSPEKAKTL  
HLA-A02:01 LILKNEVNGKP  
HLA-DQA105:C VAGPRGGIPECAV  
HLA-DRB113:0 WKVMSILKGRKF  
HLA-DRB113:0 NLILKNEVNGKLR

HLA-DRB113:0 LILKNEVNGKPRM  
HLA-DQA105:C DDDDDIRGCAVL  
HLA-DQA105:C EEAKSPEKAKTLD  
HLA-A30:02 AAAPPAPAF  
HLA-DQA101:C AAAAAAAAAAPP  
HLA-DQA101:C SLAQQQQQQQC  
HLA-DQA101:C AGAEDVAAGGEE  
HLA-A02:01 TLFVGVYVV  
HLA-C12:03 HANECAPVI  
HLA-A02:01 MVVAGVFL  
HLA-C12:03 ISKENSIL  
HLA-C12:03 FSDSRIAL  
HLA-C12:03 FCTTFGQHY  
HLA-A02:01 GQIQFAVVG  
HLA-C12:03 KTSPLMKLI  
HLA-C12:03 MKYPLCTFY  
HLA-C12:03 TTIPLHLKL  
HLA-C12:03 NEKARGKVI  
HLA-C12:03 VVAEAGSGL  
HLA-B38:01 QHQISASII  
HLA-C12:03 TPCKMTSTM  
HLA-B38:01 HHYKQLDL  
HLA-B38:01 DHDNSAMKTL  
HLA-C12:03 VPTTKTPAV  
HLA-C12:03 NADNEQDLG  
HLA-C12:03 HCFPCCTGS  
HLA-A02:01 KLEKPETESCP  
HLA-DRB111:0 RGKVIHQANLRH  
HLA-DRB111:0 ALDLNYLTNKLKN  
HLA-DRB111:0 MTPMRKTSPLMI  
HLA-DRB111:0 NSAMKTLRSKMC  
HLA-DRB111:0 GVLLIRFHPLAEP  
HLA-DRB111:0 TIPLHLKLTALAVT  
HLA-DRB111:0 TKGVLISHHYKQL  
HLA-DRB111:0 SGISSMAKLTVHII  
HLA-DRB111:0 ASIITSTQKGMIKI  
HLA-DRB111:0 FMAVKFSDSRIAL  
HLA-DRB111:0 LFGVYVVIEIARC  
HLA-DQA105:C SVNYTAVGQIQF/  
HLA-DQA105:C PKPPVVAEAGSGI  
HLA-DRB111:0 HKLKISKENSILK  
HLA-DRB111:0 VEDGILKLRNADN  
HLA-DRB111:0 QFFCTTFGQHYH  
HLA-DQA105:C PCCTGSGKSNVG  
HLA-DRB111:0 TMPRVKPKTTP  
HLA-DQA105:C VPTTKTPAVTKPE  
HLA-DRB113:0 KTEEIKLEKPETES



HLA-A02:01 TLFVGVYVV  
HLA-C12:03 HANECAPVI  
HLA-C12:03 SAMKTLRSM  
HLA-A02:01 SLLGTCLILQI  
HLA-A02:01 MVVAGVFLI  
HLA-C12:03 ISKENSKIL  
HLA-C12:03 FSDSRIAL  
HLA-C12:03 MAMHNTKGRTV  
HLA-C12:03 FCTTFGQHY  
HLA-A02:01 GQIQFAVVG  
HLA-C12:03 KTSPLMKLI  
HLA-C12:03 MKYPLCTFY  
HLA-C12:03 TTIPLHLKL  
HLA-C12:03 NEKARGKVI  
HLA-C12:03 WLHCRGKYI  
HLA-C12:03 VVAEAGSGL  
HLA-B38:01 QHQISASII  
HLA-C12:03 TPCKMTSTM  
HLA-B38:01 HHYKQLDL  
HLA-C12:03 WLHGCPPPY  
HLA-B38:01 DHDNSAMKTL  
HLA-C12:03 VPTTKTPAV  
HLA-C12:03 NADNEQDLG  
HLA-C12:03 HCFPCCTGS  
HLA-A02:01 KLEKPETESCP  
HLA-DRB111:0 RGKVIHQANLRH  
HLA-DRB111:0 QQWLIKLTSKQM  
HLA-DRB111:0 RGKYIKTWRPRYF  
HLA-DRB111:0 ALDLNYLTNKLKN  
HLA-DRB111:0 MTPMRKTSPLMI  
HLA-DRB111:0 NSAMKTLRSKMC  
HLA-DRB111:0 SAMKTLRSMMG  
HLA-DRB111:0 GVFLLIRFHPLAEM  
HLA-DRB111:0 TIPLHLKLTALAVT  
HLA-DRB111:0 TKGVLISHHYKQL  
HLA-DRB111:0 TCLILQITTGLFLAI  
HLA-DRB111:0 SGISSMAKLTVHII  
HLA-DRB111:0 ASIITSTQKGMIKL  
HLA-DRB111:0 FMAVKFSDSRIAL  
HLA-DRB111:0 LFGVYVYVIEIARC  
HLA-DQA105:C SVNYTAVGQIQF/  
HLA-DQA105:C PKPPVVAEAGSGI  
HLA-DRB111:0 HKLKISKENSKILK  
HLA-DRB111:0 VEDGILKLRNADM  
HLA-DRB111:0 QFFCTTFGQHYH  
HLA-DQA105:C PCCTGSGKSNVG.  
HLA-DRB111:0 TLRSMGKWCR

HLA-DQA105:C NLEWLHGCPPPY  
HLA-DRB111:0 TmprvrkpkTTP'  
HLA-DQA105:C VPTTKTPAVTKPE  
HLA-DRB113:0 KTEEIKLEKPETES  
HLA-A02:01 YLDNRFFTL  
HLA-A02:01 TLIGSSPHV  
HLA-A02:01 YLAIWALSSL  
HLA-A02:01 YLNNVIMWFM  
HLA-A02:01 ALDNGLFIL  
HLA-A02:01 SLNEHLQAL  
HLA-A02:01 LLASNSCFI  
HLA-C05:01 SSDEKDSVL  
HLA-B44:02 EEEHISFALY  
HLA-A02:01 FGPIWIWEV  
HLA-A02:01 ALLITARCVV  
HLA-C05:01 YSDAIGPREQW  
HLA-B44:02 SESKQEEDEEY  
HLA-B44:02 MESNRIESNRI  
HLA-A02:01 HLIYAASSL  
HLA-A02:01 SLYWWGVVPC  
HLA-A02:01 KQVDVPYIA  
HLA-A02:01 FLPLPFDI  
HLA-A02:01 RLLNEPDGTFL  
HLA-A02:01 FICDVGNQEEV  
HLA-A02:01 KLLKCAQHKA  
HLA-B44:02 NETVFIIVF  
HLA-B44:02 KEMNSELSL  
HLA-C05:01 LLDLEKSHH  
HLA-A02:01 VVAPSTPPPL  
HLA-C05:01 HQDRSPAPT  
HLA-B44:02 GERSGRSGSF  
HLA-A02:01 FLDWTELKS  
HLA-C05:01 SLDRCYSTPSM  
HLA-A02:01 FISSCESTKTV  
HLA-B44:02 KECERLQAMM  
HLA-C05:01 GLDASQPSQ  
HLA-C05:01 HDDSFMKIL  
HLA-C05:01 RSDASRGQS  
HLA-B44:02 AEVVVPCD  
HLA-C05:01 EEDQGPPCP  
HLA-A02:01 HLERAFSNQL  
HLA-A02:01 VEIPPNITSV  
HLA-A02:01 GLSGGAAPP  
HLA-C05:01 ASDVRRRGT  
HLA-C05:01 RVGGGAALA  
HLA-B44:02 NEQSAKTDV  
HLA-C05:01 STSTSQEFY

HLA-B44:02 GEKPYAWKEC  
HLA-C05:01 PAQGGNQPQ  
HLA-A02:01 SSCCRPCCCV  
HLA-C05:01 HQQQHQQQQ  
HLA-C05:01 PQQPGPAKP  
HLA-DQA104:C LTRVGGGAALAA  
HLA-DRB108:0 DSFMKILRSKMG  
HLA-DRB108:0 CERLQAMMTHLI  
HLA-DRB104:0 PKHLIYAASSLQSC  
HLA-DRB104:0 LDNRFFTLTVTSLI  
HLA-DQA104:C VRRRGTA AAAAGP  
HLA-DQA104:C GVGLSGGAAPPP  
HLA-DRB108:0 RLIIGFISKQYVTSI  
HLA-DRB104:0 VIMWFMQISEDS  
HLA-DRB104:0 SRSYLAIWALSSLI  
HLA-DRB108:0 GKLLKCAQHKAIP  
HLA-DRB104:0 EGTYIHALDNGLF  
HLA-DRB108:0 CSQRKKMLEKAR  
HLA-DRB108:0 VPYIAKHYNMSK  
HLA-DRB108:0 LLITARCVVPALHI  
HLA-DRB108:0 KYNTLHLERAFSN  
HLA-DRB108:0 LHTKKGKMALLA  
HLA-DRB108:0 QEEVYQTAKAVR  
HLA-DQA103:C FFSELAGLDASQP  
HLA-DRB104:0 KVNLSLKNNEQ  
HLA-DRB104:0 YGKYLGINDELV  
HLA-DRB108:0 SFQHYRSVFYSFE  
HLA-DRB108:0 PMNVSSVVKPSFI  
HLA-DRB104:0 EKEMNSELSLSHK  
HLA-DRB104:0 AEKEMNSELSLSF  
HLA-DQA104:C NELQNLSSAEVVA  
HLA-DRB104:0 KEDAFISSCESTKT  
HLA-DRB104:0 VFIIVFGESLLNDA  
HLA-DRB104:0 AAKIHPSTSTSQE  
HLA-DRB104:0 GMEWNGMESNI  
HLA-DRB108:0 IPPNITSVQLKMD  
HLA-DRB108:0 KPKPLVTPRTVVA  
HLA-DQA104:C VDSTLIGSSPHVE  
HLA-DRB104:0 SLDRCYSTPSMYF  
HLA-DRB104:0 QEEDEEYSWDSG  
HLA-DQA104:C ASRGQSGRSASFI  
HLA-DRB104:0 RSGRSGSFLYQVS  
HLA-DRB108:0 RSLNEHLQALLTP  
HLA-DRB108:0 CCCVRPVCGRVSI  
HLA-DRB104:0 MWYKNSSLLDLE  
HLA-DRB104:0 KEKFLDWTELKSS  
HLA-DRB108:0 WKECGKAFNKSS

HLA-DRB108:0 SSDEKDSVLNIAR  
HLA-DRB108:0 VWETFQQRFGPI  
HLA-DRB108:0 GPPCPRLSRELLE'  
HLA-DQA104:C GKPQGPPAQQGI  
HLA-DQA104:C PPPQQPGPAKPP  
HLA-DQA104:C GRHQDRSPAPTG  
HLA-DRB108:0 HQQQQQQQQQ  
HLA-A02:01 YLDNRFFTL  
HLA-A02:01 YLITSIAVLV  
HLA-A02:01 YLAIWALSSL  
HLA-C05:01 FVDISVQELL  
HLA-A02:01 FLSEGWIRA  
HLA-A02:01 SLLNMICQQV  
HLA-A02:01 ALDNGLFIL  
HLA-A02:01 SLNEHLQAL  
HLA-A02:01 LLASNSCFI  
HLA-A02:01 VLGWWFRQPV  
HLA-A02:01 AVLALLAKV  
HLA-B44:02 EEEHISFALY  
HLA-A02:01 MLLMLSTRDV  
HLA-A02:01 FGPIWIWEV  
HLA-A02:01 FLLHTGMVHCL  
HLA-B44:02 QDMCVLRGASW  
HLA-B44:02 EETEAQHLY  
HLA-A02:01 NMSNEFISL  
HLA-B44:02 SESKQEEDEEY  
HLA-A02:01 TVWSHWAAEV  
HLA-A02:01 YVWASLAGEEL  
HLA-B44:02 MESNRIESNRI  
HLA-A02:01 ILKQLFIAIV  
HLA-A02:01 HLNGLIVLRL  
HLA-A02:01 HLIYAASSL  
HLA-A02:01 KLLAGDECA  
HLA-A02:01 SLYWWGVVPC  
HLA-A02:01 KQVDVPYIA  
HLA-C05:01 KVDHELDDMF  
HLA-B44:02 AEVSHHFRELM  
HLA-A02:01 RLLNEPDGTFL  
HLA-C05:01 FASALHVSWLF  
HLA-A02:01 FICDVGNQEEV  
HLA-A02:01 KLLKCAQHKAI  
HLA-B44:02 NETVFIIVF  
HLA-C05:01 LLDLEKSHH  
HLA-B44:02 NDNAPKFEW  
HLA-C05:01 HSDATGPRE  
HLA-C05:01 YYDYNFISF  
HLA-B44:02 CEFYQNGDTY

HLA-A02:01 FQGAPKGYHKV  
HLA-A02:01 KLQKEQLKEEL  
HLA-A02:01 FAWDTGTEKL  
HLA-A02:01 FLDWTELKS  
HLA-A02:01 GIPANQHPL  
HLA-C05:01 NKDFKGALC  
HLA-B44:02 KECERLQAMM  
HLA-C05:01 KKDYYNFMA  
HLA-C05:01 GLDASQPSQ  
HLA-C05:01 KKDFSDPLD  
HLA-A02:01 HLERAFSNQL  
HLA-A02:01 VEIPPNITSV  
HLA-A02:01 NTYCEGVLV  
HLA-C05:01 RACGVGSAE  
HLA-B44:02 MEPSFTREN  
HLA-B44:02 TERCAFRKHL  
HLA-C05:01 RVGGGAALA  
HLA-B44:02 NEQSAKTDV  
HLA-B44:02 GEKPYAWKEC  
HLA-C05:01 PAQGGNQPQ  
HLA-A02:01 SSSCRPCCCV  
HLA-B44:02 GEKTYKCEEC  
HLA-B44:02 REKPYKCEEC  
HLA-C05:01 GGSKGGCGC  
HLA-B44:02 RGRPVPHVLW  
HLA-C05:01 PQQPGPAKP  
HLA-DRB108:0 LNGLIVLRLRHLNI  
HLA-DQA104:C LTRVGGGAALAA  
HLA-DRB104:0 YYNFMASLNLRN  
HLA-DRB108:0 CERLQAMMTHLI  
HLA-DRB104:0 PKHLIYAASSLQSC  
HLA-DRB104:0 LDNRFFTLTVTSLI  
HLA-DQA104:C VWSHWAAEVAV  
HLA-DRB108:0 TERCAFRKHLGAT  
HLA-DRB108:0 RLIIGFISKQYVTSF  
HLA-DRB108:0 ILSSRLTQHKKIHT  
HLA-DRB108:0 HVSWLFPWYRYK  
HLA-DQA104:C AYSAYVWASLAG  
HLA-DRB104:0 SRSYLAIWALSSLI  
HLA-DRB108:0 GKLLKCAQHKAIP  
HLA-DRB104:0 EGTYIHALDNGLF  
HLA-DRB108:0 CSQRKKMLEKAR  
HLA-DRB104:0 EPSFTRENTLMFM  
HLA-DQA104:C WIRAEVPGSPAV  
HLA-DRB108:0 AQQLRVFGGAPK  
HLA-DRB104:0 LAKVLQIDSSVSFI  
HLA-DRB108:0 SFTMTVPFRGRP'

HLA-DQA104:C ISFWDFVDISVQE  
HLA-DRB104:0 KQLFIAIVTETEK  
HLA-DRB104:0 ANLMLLMLSTRD  
HLA-DRB108:0 VPYIAKHYNMSK  
HLA-DRB108:0 KYNTLHLERAFSN  
HLA-DRB108:0 LHTKKGKMALLA  
HLA-DRB108:0 LANPFVYSLHNKE  
HLA-DQA104:C TYCEGVLVAPAGI  
HLA-DRB104:0 SNEFISLSPGTPPS  
HLA-DRB108:0 QEEVYQTAKAVR  
HLA-DQA104:C DDWTISGIPANQ  
HLA-DRB108:0 RVLGWVFRQPV  
HLA-DQA103:C FFSELAGLDASQP  
HLA-DRB104:0 VDDFYDYNFISF  
HLA-DQA104:C AILYLITSI AVLVER  
HLA-DQA104:C RVCRCACGVGSAE  
HLA-DRB108:0 VSHHFRELMQLFI  
HLA-DRB108:0 AAGIMAHICRKDI  
HLA-DRB104:0 KVNLSLKNNEQ  
HLA-DRB108:0 SFQHYRSVFYSFE  
HLA-DRB104:0 TEAQHLYQSILPD  
HLA-DRB108:0 LNMICQQVEAIKI  
HLA-DRB104:0 FLLASTAQDGDKI  
HLA-DRB108:0 TQTVHCFLLHTGM  
HLA-DRB104:0 VFIIVFGESLLNDA  
HLA-DQA103:C EWTASPYQAAEC  
HLA-DQA104:C PPTSASRVAGTTC  
HLA-DRB104:0 GMEWNGMESNI  
HLA-DRB108:0 IPPNITSVQLKMD  
HLA-DRB104:0 MCEFQYNGDTYS  
HLA-DRB104:0 QEEDEEYSWDSG  
HLA-DRB108:0 RSLNEHLQALLTP  
HLA-DRB108:0 KREYKLQKEQLKE  
HLA-DRB108:0 SSHLTQHKTHTG  
HLA-DRB108:0 CCCVRPVCGRVSI  
HLA-DRB104:0 MWYKNSSLLDLE  
HLA-DQA104:C PKFEWPSYEAELS  
HLA-DRB104:0 KEKFLDWTELKSS  
HLA-DRB108:0 WKECGKAFNKSS  
HLA-DRB108:0 VWETFQQRFGPI  
HLA-DRB104:0 SDELVGHSDATGI  
HLA-DRB108:0 LDDMFGKSDRPA  
HLA-DQA104:C GK PQGPPAQGGI  
HLA-DQA104:C PPPQQPGPAKPP  
HLA-DQA104:C CGGSKGGCGSCG  
HLA-A02:01 ILMLLAPIMV  
HLA-A02:01 YLAIWALSSL

HLA-C05:01 YEDFVVNGF  
HLA-A02:01 KVFELISLL  
HLA-A02:01 FGPIWIWEV  
HLA-B44:02 KELLINHQRİY  
HLA-A02:01 HLIYAASSL  
HLA-A02:01 SLYWWGVVPC  
HLA-A02:01 KQVDVPYIA  
HLA-A02:01 RLLNEPDGTFL  
HLA-A02:01 FICDVGNQEEV  
HLA-A02:01 KLLKCAQHKAİ  
HLA-B44:02 NETVFIİVF  
HLA-A02:01 VLEQQRVGLAV  
HLA-C05:01 LLDLEKSHH  
HLA-A02:01 FLDWTELKS  
HLA-B44:02 KECERLQAMM  
HLA-C05:01 GLDASQPSQ  
HLA-A02:01 RMGHQPPP  
HLA-A02:01 HLERAFSNQL  
HLA-A02:01 VEIPPNITSV  
HLA-C05:01 STEKPTTPT  
HLA-C05:01 RASLR TSHR  
HLA-B44:02 NEQSAKTDV  
HLA-B44:02 GEKPYAWKEC  
HLA-B44:02 KEPSPTTTK  
HLA-DRB108:0 CERLQAMMTHLI  
HLA-DRB104:0 PKHLIYAASSLQSC  
HLA-DRB104:0 RKFV F E L I S L L N Y T A  
HLA-DRB104:0 FRKFV F E L I S L L N Y T  
HLA-DRB104:0 WPYLTAETLKNRI  
HLA-DRB108:0 NGFNVLYNKKPV  
HLA-DRB108:0 RLIIGFISKQYVTSF  
HLA-DRB108:0 LAPIMVISSSYTLII  
HLA-DRB104:0 SRSYLAIWALSSLL  
HLA-DRB108:0 GKLLKCAQHKAİP  
HLA-DRB108:0 CSQRKKMLEKAR  
HLA-DRB108:0 VPYIAKHYNMSKİ  
HLA-DRB108:0 PRASLR TSHRAS P  
HLA-DRB108:0 KYNTLHLERAFSN  
HLA-DRB108:0 QEEVYQTAKAVR  
HLA-DQA104:C EQQRVGLAVDM  
HLA-DRB108:0 KELLINHQRİYTNE  
HLA-DQA103:C FFSELAGLDASQP  
HLA-DRB104:0 KVN L Q S L K N N E Q  
HLA-DRB104:0 VFIIVFGESLLNDA  
HLA-DRB108:0 IPPNITSVQLKMD  
HLA-DRB104:0 MWYKNSSLLDLE  
HLA-DRB104:0 KEKFLDWTELKSS

HLA-DRB108:0 WKECGKAFNKSS  
HLA-DRB108:0 VWETFQQRFGPI  
HLA-DRB104:0 KPTISTEKPTTPTE  
HLA-DRB104:0 PTTTKSAPTTPKEL  
HLA-B57:01 KSVMQELEDY  
HLA-DRB107:0 SVKEMLKSVMQE  
HLA-B44:03 IEWMFIDFGM  
HLA-B57:01 KSVMQELEDY  
HLA-DQA102:C MFIDFGMDLAAC  
HLA-DRB107:0 SVKEMLKSVMQE  
HLA-B57:01 KSVMQELEDY  
HLA-B57:01 VNLETNVEELW  
HLA-DRB107:0 LIFGAFVGLKAV  
HLA-DRB107:0 SVKEMLKSVMQE  
HLA-C06:02 SRDGSMRTV  
HLA-C06:02 GSPQLRRSV  
HLA-DRB107:0 SGGSPQLRRSVS  
HLA-DQA102:C RDGSMRTVIVQD  
HLA-C06:02 KRGTYVIYV  
HLA-DRB107:0 TYDIFYTAAKRG  
HLA-A24:02 SYIATLLYVF  
HLA-B08:01 FIKRMFNSA  
HLA-C07:01 NRQQCAHSL  
HLA-C07:01 TRRGSSLHV  
HLA-C07:01 YRNVHAVVFI  
HLA-A24:02 HYAALALYF  
HLA-C07:01 VREVCPHQL  
HLA-B08:01 YLDNRFFTL  
HLA-C07:01 SRMDLQQL  
HLA-C07:01 LRHYNIPVL  
HLA-B08:01 CVKAHHYTA  
HLA-A24:02 AYLFTVSSAF  
HLA-B08:01 SLYEHLQAL  
HLA-B08:01 SLNEHLQAL  
HLA-C07:01 THFNASPSI  
HLA-A24:02 YYLAARNSL  
HLA-B35:02 LPISEFVL  
HLA-A24:02 RFPSWVNF  
HLA-C07:01 SRVRNVQPLL  
HLA-B08:01 SILTKHKVI  
HLA-A24:02 TWSPGLYLI  
HLA-C07:01 FRHLCPSF  
HLA-C07:01 SSTEREQSM  
HLA-B08:01 NPRLRVIV  
HLA-B35:02 YPSPVATSYL  
HLA-C07:01 ALFSRTKLL  
HLA-C07:01 THRGDINDI



|            |              |
|------------|--------------|
| HLA-A24:02 | SFTALVAYSF   |
| HLA-B08:01 | LQRSRGA AAA  |
| HLA-B08:01 | WLISRSGTI    |
| HLA-A24:02 | SYLPGFGSL    |
| HLA-B08:01 | DFRIRLLCV    |
| HLA-C07:01 | KAFSHSSTL    |
| HLA-B35:02 | SPDPSHTTL    |
| HLA-A24:02 | RYKGWRGGLKF  |
| HLA-B08:01 | LLVYRKWRA    |
| HLA-A01:01 | LSSLIDSSPY   |
| HLA-B35:02 | HPQLGAGIVL   |
| HLA-A24:02 | KYSEKETF     |
| HLA-A24:02 | KYGYVSVPM    |
| HLA-B35:02 | TPVDTSTPV    |
| HLA-B08:01 | HQMQQTINVAL  |
| HLA-B35:02 | EAFSGSSVF    |
| HLA-B35:02 | HPDLPTHRPL   |
| HLA-C07:01 | ERCSDSDSL    |
| HLA-A24:02 | FYSFEEHISF   |
| HLA-B35:02 | TASEGSTPL    |
| HLA-C07:01 | SHLARHRR I   |
| HLA-C07:01 | PREEQRKEF    |
| HLA-B35:02 | TPVDTSTL     |
| HLA-B35:02 | CPLPGTCHIL   |
| HLA-A01:01 | LSDSHTLSS    |
| HLA-B35:02 | SPDLAATL     |
| HLA-B08:01 | SSNLRHG SF   |
| HLA-B35:02 | SPLTASNTSL   |
| HLA-B08:01 | MALTGCWSV    |
| HLA-B08:01 | AAKKKLRNV    |
| HLA-C07:01 | YHMTQRGR C   |
| HLA-B08:01 | STLTKHKII    |
| HLA-C07:01 | IRHKRIHTG    |
| HLA-A01:01 | EMEDNYDYY    |
| HLA-B08:01 | SHLSRHHRL    |
| HLA-A24:02 | CFLTQLAGF    |
| HLA-C07:01 | DVHDDVWLL    |
| HLA-C07:01 | SLQGAARLV    |
| HLA-C07:01 | GSCSTAREM    |
| HLA-C07:01 | KRAGVSHLQ    |
| HLA-B35:02 | NPMNALTTKF   |
| HLA-C07:01 | LEGEKAQLL    |
| HLA-B35:02 | APASLQAM     |
| HLA-A24:02 | KYSVSN IATEI |
| HLA-A24:02 | LYECSECQKAF  |
| HLA-C07:01 | IRRQLAQEKKL  |
| HLA-C07:01 | NSCPQVTEI    |

|            |             |
|------------|-------------|
| HLA-B08:01 | CGKAFRQSA   |
| HLA-A24:02 | KVQSHIFSI   |
| HLA-C07:01 | GRGSPPTHGRM |
| HLA-C07:01 | SHYSQTDRQ   |
| HLA-A01:01 | FQDVFFAY    |
| HLA-B08:01 | LPKVVQAM    |
| HLA-A24:02 | TYCINNEAL   |
| HLA-C07:01 | RRDSAVIGGVI |
| HLA-B35:02 | NASAIQSIL   |
| HLA-C07:01 | RRSHTGERP   |
| HLA-A01:01 | MTDKCHDCW   |
| HLA-B35:02 | VPWGFTRAHL  |
| HLA-B08:01 | STLTKHKRI   |
| HLA-B08:01 | CIGCRFDDI   |
| HLA-A24:02 | EYNPAACCRI  |
| HLA-A24:02 | PYGCKEKGKAF |
| HLA-B08:01 | CGKTFAHNSAL |
| HLA-B35:02 | NADFNDMQM   |
| HLA-C07:01 | ARIVLMDDV   |
| HLA-A24:02 | RIQSSLQAF   |
| HLA-C07:01 | VKNPRAEDL   |
| HLA-A24:02 | KQAEVWSGI   |
| HLA-C07:01 | GRSGCTHCS   |
| HLA-C07:01 | YRSYLTHQ    |
| HLA-C04:01 | IFDKASESL   |
| HLA-B08:01 | KGKKKMSTA   |
| HLA-C07:01 | FHQKGLIQ    |
| HLA-B35:02 | SPATSKCISF  |
| HLA-C07:01 | VSSCCKPQC   |
| HLA-B08:01 | STLTKHKKI   |
| HLA-C07:01 | KAFNQSSNL   |
| HLA-C07:01 | GSSGRKQQF   |
| HLA-A24:02 | PYKCNECGKVF |
| HLA-C07:01 | SSSVCWKIL   |
| HLA-C07:01 | NRFVKKNSQ   |
| HLA-A01:01 | TTQASPGPQVY |
| HLA-B08:01 | EGRGVKCAL   |
| HLA-A24:02 | PYKCKEKGKAF |
| HLA-B08:01 | FIQKSVFSV   |
| HLA-C07:01 | SQYSDIGSM   |
| HLA-C07:01 | GSTKPPPQQ   |
| HLA-C07:01 | ASVAKIQLH   |
| HLA-A24:02 | EYGTEAENNI  |
| HLA-A01:01 | WSHVRWKGRY  |
| HLA-A24:02 | CLSRVLGWWF  |
| HLA-C07:01 | RILNNARDK   |
| HLA-A24:02 | VIQETLWLL   |

|            |             |
|------------|-------------|
| HLA-C07:01 | LINGVNRTQ   |
| HLA-A24:02 | PYECKEKGKAF |
| HLA-C07:01 | YDESGPSMV   |
| HLA-B08:01 | GPKVKGDV    |
| HLA-C07:01 | ARHKIIHTG   |
| HLA-A24:02 | IWKLSHSNPTI |
| HLA-B08:01 | NLTTHKII    |
| HLA-C07:01 | TRHKIIHTG   |
| HLA-A24:02 | PYKCEECGKAF |
| HLA-C07:01 | NQENCVGIL   |
| HLA-A24:02 | QFKDLGEENF  |
| HLA-A01:01 | ATSVLDMLA   |
| HLA-B08:01 | TPTEKPTI    |
| HLA-B08:01 | CRKKSARPA   |
| HLA-C07:01 | KATSNEKDS   |
| HLA-C07:01 | ERIHTGEKP   |
| HLA-C07:01 | KLIKQURLA   |
| HLA-A24:02 | PYKCEECGKDF |
| HLA-B08:01 | HLTTHKRI    |
| HLA-A24:02 | EWNGMEWNGI  |
| HLA-C07:01 | SYNEEDPVD   |
| HLA-A24:02 | CQIGKVVPNPF |
| HLA-B35:02 | IPTEKPTI    |
| HLA-B08:01 | MLNAFSQAP   |
| HLA-B35:02 | QPTCCHPSCCI |
| HLA-A24:02 | VCVVCVCF    |
| HLA-A01:01 | KCEECGKAFY  |
| HLA-B08:01 | TTHKRIHTG   |
| HLA-C07:01 | IHTGEKPYP   |
| HLA-A24:02 | AVLCFILWI   |
| HLA-B08:01 | SPKRGLNSQ   |
| HLA-C07:01 | KVDIEGPDV   |
| HLA-C07:01 | MSQEFRGHR   |
| HLA-C04:01 | RFDSDAASPRE |
| HLA-A24:02 | AVPAGLQW    |
| HLA-C07:01 | FSLQETCEA   |
| HLA-A01:01 | ATDVTGGK    |
| HLA-A01:01 | KVIHTGEKPY  |
| HLA-A01:01 | QSSNLTHK    |
| HLA-B35:02 | LAGELGTCSSV |
| HLA-B08:01 | CEECGKAFNL  |
| HLA-B08:01 | LTKHKIIHTG  |
| HLA-C04:01 | CEECGKAFK   |
| HLA-B08:01 | ECGKAFNQSA  |
| HLA-C04:01 | CEECGKAFN   |
| HLA-C04:01 | CEECGKAFS   |
| HLA-A24:02 | PYKCEECGKAY |

HLA-DQA105:C LQSRGAAAASA  
HLA-DRB111:0 LPGFGSLVKRVV  
HLA-DRB111:0 PGFGSLVKRVVNI  
HLA-DRB111:0 YLPGFGSLVKRVV  
HLA-DRB111:0 GFSMFSLTKHKV  
HLA-DRB111:0 YVFHAVFSLIRWK  
HLA-DRB111:0 ARLLALFSRTKLLC  
HLA-DRB111:0 FSYRSYLTTHRRSI  
HLA-DQA105:C RRDSAVIGGVIAV  
HLA-DRB111:0 LALGLLVYRKWR/  
HLA-DRB111:0 VLCFILWIHKKQ|  
HLA-DRB111:0 LRVIVELHRKVSSL  
HLA-DRB111:0 SVFSTLTCHKIHT|  
HLA-DRB111:0 QSQYYLAARNSL\|  
HLA-DRB111:0 GLRFIQLKNPWS|  
HLA-DQA105:C CALVGDGAVGKT  
HLA-DRB104:0 LSTFIHLSPLAAT  
HLA-DRB104:0 LTTKFVRTSTNKV  
HLA-DRB111:0 PYKIFKNTSFIKRM  
HLA-DRB111:0 APIPQGFSCLSRV  
HLA-DRB111:0 PIPQGFSCLSRVL(  
HLA-DRB111:0 QGFSCLSRVLGW  
HLA-DRB111:0 WRGGLKFARKPL  
HLA-DRB111:0 NQTSHLIRHKRIH|  
HLA-DQA105:C GEEETAAGSSGI  
HLA-DQA105:C EYHQPPAPASVA  
HLA-DQA105:C HPGLHGPAVPA  
HLA-DRB111:0 GAGIVLLL RAGFY.  
HLA-DQA105:C LPHRNASAAAKKI  
HLA-DQA105:C WLISRSGTIAEVG  
HLA-DRB104:0 NRAVKSLQNASA  
HLA-DRB111:0 GKAFRQSANLYVI  
HLA-DRB111:0 QGKLIKQRLAKM  
HLA-DRB104:0 MLNAFSQAPSTM  
HLA-DRB104:0 LDNRFFTLTVTSLI  
HLA-DRB111:0 GKVFTQNSHLAR|  
HLA-DQA105:C MDLQQLGALAVI  
HLA-DRB111:0 VAQMHS�FRHLC  
HLA-DQA105:C KKSARPAAGVGD  
HLA-DRB104:0 GKTFAHNSALRAI  
HLA-DRB111:0 GKAFKWSSTLTK|  
HLA-DQA105:C WAATTARNALV\|  
HLA-DRB111:0 QETLWLLSGVKKI  
HLA-DQA105:C PRLGPGWAGAH|  
HLA-DRB104:0 GKAFNQSSNLTT|  
HLA-DRB111:0 GKAFRQSSHLTT|  
HLA-DRB104:0 GKVFNQSSNLTT|

HLA-DRB104:0 KGYLTDLNSMIPT  
HLA-DRB111:0 WLEFAAKRKQA  
HLA-DRB104:0 SQCNVYFANLSNI  
HLA-DRB104:0 GKAFSHSSTLAKH  
HLA-DQA105:C MCRSLQGAARLV  
HLA-DQA105:C SLSSYPSPVATSYL  
HLA-DQA105:C IITHFNASPSITEST  
HLA-DQA105:C LQVFDAGSCSTAF  
HLA-DQA105:C DKYGYVSVPMSS  
HLA-DRB111:0 QLAVCQQRIRRQ  
HLA-DQA105:C VKAHHYAALALYF  
HLA-DRB104:0 EECGKAFNLSSTL  
HLA-DQA105:C MSGILAVGPMFV  
HLA-DRB104:0 TSEVVRIQSSLQA  
HLA-DRB111:0 CWKILLQFQCRNI  
HLA-DRB111:0 VEHYRNVHAVV  
HLA-DQA105:C PISTASEGSTPLTS  
HLA-DRB104:0 GKAFNQSSTLTKF  
HLA-DRB104:0 TAYLFTVSSAFQG  
HLA-DQA105:C WAEYNPAACGRI  
HLA-DQA105:C DHAYHGHLSLID  
HLA-DRB111:0 NWWSQLTSHKKI  
HLA-DRB104:0 GKAFNQSSTLTKF  
HLA-DRB111:0 GEVVLSRKVLLDG  
HLA-DQA105:C GCKEKGKAFASLS  
HLA-DQA105:C PRVETEAPASLQA  
HLA-DRB111:0 LFKLKPLSNKTATI  
HLA-DQA105:C NEIEAFSGSSVFQI  
HLA-DQA105:C PQQPGSAKPSAQ  
HLA-DQA105:C LLIAAGRTIKVWD  
HLA-DQA105:C FVLLVAGETKPSS  
HLA-DRB111:0 RSLYEHLQALLTP  
HLA-DRB111:0 CIGCRFDDISRLSS  
HLA-DQA105:C FQEKRAGVSHLQ  
HLA-DRB111:0 SSTLTKHKRIHTGI  
HLA-DQA105:C ESKGLAGELGTCS  
HLA-DQA105:C ANGVPASFVPKPI  
HLA-DRB104:0 TQFVRFDSDAASI  
HLA-DQA105:C PMSVIVGVGNAI  
HLA-DRB104:0 EECGKAFNQSSTL  
HLA-DQA105:C LHLGTVAYGLDSM  
HLA-DQA105:C TNEFHTSMALTG  
HLA-DRB111:0 QVPPLGHLPKVVI  
HLA-DRB104:0 GKAFNESSNLTF  
HLA-DRB111:0 FIGFEGVKGKKKM  
HLA-DRB104:0 RQIWKLSHSNPTI  
HLA-DRB111:0 SILTTHKRIHTGEK

HLA-DRB104:0 EECGKAFSNSSTL  
HLA-DQA105:C NARDKTGSSAQK  
HLA-DRB111:0 KQSSHLTRHKIHH  
HLA-DRB111:0 FNEQSHLSRHHRI  
HLA-DRB111:0 EECGKAFKHSSAL  
HLA-DQA105:C KQEYDESGPSMV  
HLA-DRB104:0 NECGKVFSDRSAI  
HLA-DRB111:0 NNEALYDICFRTL  
HLA-DQA105:C ILGNIGICGAYGKI  
HLA-DRB111:0 RIRLLCVGLKHLLC  
HLA-DQA105:C FLTQLAGFLANQC  
HLA-DQA105:C STLVTSTGTSSSF  
HLA-DQA105:C NLSPALGQMPISF  
HLA-DQA105:C PGSVVEASSNLRH  
HLA-DRB111:0 SSTLTTHKRIHTGI  
HLA-DQA105:C PTQPGGTGLSDSI  
HLA-DQA105:C QCAHSLFLASAEF  
HLA-DQA105:C KCISFPGSSESPLS  
HLA-DRB111:0 TKIPVTLRVRNV  
HLA-DRB111:0 TSVLDMLAKNLH  
HLA-DQA105:C SLHVEPSKTGVSH  
HLA-DQA105:C EFDPPVPGVTKVI  
HLA-DRB111:0 GKGFQKSVFSVH  
HLA-DRB111:0 GKAFNQSSKLTET  
HLA-DRB111:0 QLLSPVFSIAPKNI  
HLA-DQA105:C ENNIGTEGSVPSC  
HLA-DRB111:0 EECGKAFYQSSILS  
HLA-DRB111:0 SFQHYRSVFYSFE  
HLA-DQA105:C PESSPLTASNTSLI  
HLA-DRB111:0 FNQSSTLARHKIHF  
HLA-DRB111:0 HLRHYNIIPVLSDI  
HLA-DRB104:0 QPLHQMQQTNV  
HLA-DRB111:0 NYDYGGQQRVQI  
HLA-DQA105:C DEKYSVSNIAIEIK  
HLA-DRB104:0 QDVFFAYPNRPD  
HLA-DRB111:0 RVIKNYKRCFPVIF  
HLA-DQA105:C EEAGAPVPEDATI  
HLA-DQA105:C MVDACASFLTEA  
HLA-DRB111:0 SSTLTYHKVIHTGI  
HLA-DQA105:C ELTQKAARIVLMI  
HLA-DRB111:0 GKCFHQKGSIIQF  
HLA-DRB111:0 SGYHMTQRGRCE  
HLA-DQA105:C FVVPWGFTRAHL  
HLA-DRB111:0 KECGKAFNQSAH  
HLA-DQA105:C TQHQSIHAGVKP'  
HLA-DRB111:0 EECGKAFNRSSQI  
HLA-DRB111:0 TDLNQHKKIHTGI

HLA-DRB111:0 SILAKHKVIHTGEK  
HLA-DRB111:0 SILTKHKIIHTGEKI  
HLA-DRB111:0 SYDCIIHERIHTGE  
HLA-DQA105:C VFRRDAHKSEVAI  
HLA-DRB104:0 HDDVWLLSDATV  
HLA-DQA105:C KGVCQIGKVVPN  
HLA-DQA105:C THRPLTGWFCV  
HLA-DQA105:C RGIVTDGRSGCTH  
HLA-DQA105:C TTPVDTSTPVTTT  
HLA-DRB111:0 HILVEHQKIHSGE  
HLA-DRB111:0 PAYGKDPRVVTN  
HLA-DQA105:C KADVDSVSGPKVD  
HLA-DRB104:0 DSQYSDIGSMQN  
HLA-DQA105:C WNGMEWNGIES  
HLA-DRB104:0 EQSMRKSSTFPR  
HLA-DRB111:0 DVDLHLKGPVKK  
HLA-DQA105:C ARVWSVDKGM  
HLA-DQA105:C SDSDSLAPPQH  
HLA-DQA105:C APPVTSARFPSW  
HLA-DRB104:0 RSLNEHLQALLTP  
HLA-DQA105:C QNKGQTWSPGL  
HLA-DRB111:0 QSSHYSQTDROG  
HLA-DQA105:C SMENSCPQVTEI  
HLA-DRB111:0 SNLTKHKIIHTGEK  
HLA-DRB104:0 SKPFSLQETCEAK  
HLA-DRB111:0 SCCISSCCRPSCCE  
HLA-DQA103:C KCHDCWAILEEYI  
HLA-DRB104:0 LYPINTPDQKEIV  
HLA-DRB104:0 KPTISPEKLTTPTE  
HLA-DQA105:C SSSCCRPSCCVSSC  
HLA-DQA105:C KLTIPTEKPTIPTEH  
HLA-DQA105:C RRGVCVCVCVCV  
HLA-A24:02 SYIATLLYVF  
HLA-A24:02 CYSTPSMFF  
HLA-B08:01 YLDNRFFTL  
HLA-B08:01 SLNEHLQAL  
HLA-A01:01 QSSSTPYLY  
HLA-B08:01 KPRGRFLSG  
HLA-C07:01 VRYFDNLSL  
HLA-A24:02 YYLAARNSL  
HLA-C07:01 IHFGHIWQK  
HLA-A24:02 RFPSWVNF  
HLA-A24:02 TWSPGLYLI  
HLA-A24:02 FYMIVIPML  
HLA-A24:02 KYMRNKQPFSW  
HLA-B08:01 NPRLRVIV  
HLA-B08:01 LQSRGAAA

|            |             |
|------------|-------------|
| HLA-B08:01 | WLISRSGTI   |
| HLA-C07:01 | GRIAEPRQS   |
| HLA-A24:02 | AFGCSSWLI   |
| HLA-A01:01 | LSSLIDSSPY  |
| HLA-C07:01 | VRVGAIQYA   |
| HLA-B35:02 | HPDLPTHRPL  |
| HLA-C07:01 | ERCSDSDSL   |
| HLA-A24:02 | FYSFEEEHISF |
| HLA-B35:02 | FAIGGLMGTL  |
| HLA-C07:01 | MHFSNFTII   |
| HLA-C07:01 | KAFSQSSTL   |
| HLA-B08:01 | SSNLRHGFS   |
| HLA-B35:02 | SPLTASNTSL  |
| HLA-B08:01 | MALTGCWSV   |
| HLA-B08:01 | AAKKKLRNV   |
| HLA-A24:02 | AFLAFPQCF   |
| HLA-B08:01 | TKRTRPYL    |
| HLA-C07:01 | TAHTQG VVV  |
| HLA-C07:01 | KRAGVSHLQ   |
| HLA-C07:01 | VRQEQESPCFL |
| HLA-A01:01 | CTMKFSSWSY  |
| HLA-C07:01 | SVQPDILEL   |
| HLA-B08:01 | FPFYKNKA    |
| HLA-A24:02 | LYECSECQKAF |
| HLA-B08:01 | VPKAQRHISA  |
| HLA-B35:02 | VPWGFTRAHL  |
| HLA-A24:02 | RIQSSLQAF   |
| HLA-A24:02 | SFQCNEGKAF  |
| HLA-A24:02 | LWQWSSCRHI  |
| HLA-A24:02 | KQAEVWSGI   |
| HLA-C07:01 | GSSGRKQQF   |
| HLA-C07:01 | SSMKPTPKE   |
| HLA-B08:01 | DPKGQQQM    |
| HLA-A01:01 | TTQASPGPQVY |
| HLA-C07:01 | ASVAKIQLH   |
| HLA-A24:02 | IWKLSHSNPTI |
| HLA-C07:01 | DYSEGGPLY   |
| HLA-B08:01 | NLTTHKII    |
| HLA-A24:02 | PYKCEECGKAF |
| HLA-A24:02 | KFLLLQELV   |
| HLA-B08:01 | CRKKSARPA   |
| HLA-B35:02 | QPTCCRPSCSI |
| HLA-C07:01 | GRKEGEENQ   |
| HLA-C07:01 | HKAVDQPRQL  |
| HLA-A24:02 | AVPAGLQW    |
| HLA-C07:01 | GSLADAWTH   |
| HLA-A24:02 | QNLNKYLKDF  |



HLA-A01:01 ATDVTGGK  
HLA-A01:01 ISDLTEQIG  
HLA-C07:01 HKHEHDQGH  
HLA-DQA105:C LQSRGAAAAASA  
HLA-DQA105:C TQGVVVQPAAA\  
HLA-DRB111:0 YVFHAVFSLIRWK  
HLA-DQA105:C RGRFLSGPVSVSI\  
HLA-DRB111:0 LRVIVELHRKVSSI  
HLA-DRB111:0 QSQYYLAARNSL\  
HLA-DQA105:C VSIFAIGGLMGTL  
HLA-DRB111:0 SNFTIITQRVLSI/  
HLA-DRB111:0 FSNFTIITQRVLS  
HLA-DQA105:C GEEETAAGSSGI  
HLA-DQA105:C EYHQPPAPASVA  
HLA-DQA105:C TSSLTQAQVASVF  
HLA-DQA105:C HPGLHGPAVPA  
HLA-DQA105:C LPHRNASAAAKKI  
HLA-DQA105:C WLISRSGTIAEVG  
HLA-DRB104:0 LDNRFFTLTVTSLI  
HLA-DRB111:0 LWQWSSCRHIRR  
HLA-DQA105:C KKSARPAAGVGD  
HLA-DQA105:C SSGSVVSSVPKAC  
HLA-DRB111:0 GMFNIAPHKVRV  
HLA-DRB104:0 QSGPFQSSSTPYL  
HLA-DRB111:0 PQCFYSKTKVMP\  
HLA-DQA105:C SRLSPGGSLADAV  
HLA-DRB104:0 GKAFQSSTLTTH  
HLA-DRB111:0 NKYLKDFEIVKRKI  
HLA-DRB111:0 WLEFAAKRKQA  
HLA-DQA105:C TRPYLFGAGCFSII  
HLA-DRB111:0 KNLFSRKFPFYKN  
HLA-DRB104:0 TSEVVRIQSSLQA  
HLA-DQA105:C DHAYHGHLSLID  
HLA-DRB111:0 LFKLKPLSNKTATI  
HLA-DRB111:0 FGCSSWLIRHQRT  
HLA-DQA105:C LLIAAGRTIKVWD  
HLA-DQA105:C FQEKRAGVSHLQ  
HLA-DRB111:0 IHFGHIWQKTLTV  
HLA-DQA105:C TNEFHTSMALTG  
HLA-DRB104:0 GKAFNESSNLTF  
HLA-DRB104:0 RQIWKLSHSNPTI  
HLA-DRB104:0 EECGKAFSNSSTL  
HLA-DRB111:0 GPKYMRNKQPFSS  
HLA-DQA105:C PGSVVEASSNLRF  
HLA-DRB111:0 SFQHYRSVFYSFE  
HLA-DQA105:C PESSPLTASNTSLI  
HLA-DQA105:C DSWGRIAEPRQS

HLA-DQA105:C LLPFSTGPPTECVI  
HLA-DRB104:0 PHPVRYFDNLSLC  
HLA-DQA105:C FVVPWGFTRAHL  
HLA-DRB111:0 KGQQQMWWQILC  
HLA-DRB104:0 PSMFFELPDSFQF  
HLA-DQA105:C EDYSEGGPLYKNC  
HLA-DQA105:C FQCNESGKAFNC  
HLA-DRB111:0 DKKFLLLQELVEKI  
HLA-DQA105:C THRPLTGWFPQCV  
HLA-DQA105:C GRVCRIGFSVQPE  
HLA-DRB111:0 HILVEHQKIHSGE  
HLA-DQA105:C FSSWSYDKAKIDL  
HLA-DQA105:C SDSDSLAPPQHLL  
HLA-DQA105:C APPVTSARFPSW'  
HLA-DRB104:0 RSLNEHLQALLTP  
HLA-DQA105:C QNKGQTWSPGL'  
HLA-DQA105:C PTCCRPSCSISSCC  
HLA-DRB111:0 SNKVKSDPHKAVI  
HLA-DQA105:C LTEQIGETGKNLQ  
HLA-DQA105:C KEEPCNIFPCPAF)  
HLA-DQA105:C HDQGHGHQRGF  
HLA-DQA105:C NQNPPCPRLNGV  
HLA-A24:02 SYIATLLYVF  
HLA-A24:02 CYSTPSMFF  
HLA-B08:01 YLDNRFFTL  
HLA-C07:01 SRMDLQQL  
HLA-B08:01 SLNEHLQAL  
HLA-A01:01 QSSSTPYLY  
HLA-B08:01 KPRGRFLSG  
HLA-C07:01 VRYFDNLSL  
HLA-A24:02 YYLAARNSL  
HLA-A24:02 RFPSWVNF  
HLA-A24:02 TWSPGLYLI  
HLA-C07:01 FRHLCPSF  
HLA-A24:02 KYMRNKQPFSW  
HLA-B08:01 NPRLRVIV  
HLA-B08:01 LQSRGAAA  
HLA-B08:01 WLISRSGTI  
HLA-C07:01 GRIAEPQRS  
HLA-A01:01 LSSLIDSSPY  
HLA-B35:02 HPDLPTHRPL  
HLA-C07:01 ERCSDDSL  
HLA-A24:02 FYSFEEHISF  
HLA-C07:01 LRFSVGPLC  
HLA-C07:01 MHFSNFTII  
HLA-B08:01 SSNLRHGSF  
HLA-B35:02 SPLTASNTSL

HLA-B08:01 MALTGCWSV  
HLA-B08:01 AAKKKLRNV  
HLA-A24:02 AFLLAFPQCF  
HLA-C07:01 HRGLHGPQA  
HLA-C07:01 TAHTQG VVV  
HLA-B35:02 FALDVDNRF  
HLA-C07:01 KRAGVSHLQ  
HLA-C07:01 VRQEQESPCFL  
HLA-A01:01 CTMKFSSWSY  
HLA-B08:01 FPFYKNKA  
HLA-A24:02 LYECSECQKAF  
HLA-B08:01 VPKAQRHISA  
HLA-B35:02 VPWGFTRAHL  
HLA-A24:02 RIQSSLQAF  
HLA-A24:02 LWQWSSCRHI  
HLA-A24:02 KQAEVWSGI  
HLA-C07:01 DSSSKKRER  
HLA-C07:01 GSSGRKQQF  
HLA-A01:01 TTQASPGPQVY  
HLA-C07:01 ASVAKIQLH  
HLA-A24:02 IWKLSHSNPTI  
HLA-C07:01 DYSEGGPLY  
HLA-A24:02 KFULLQELV  
HLA-B08:01 CRKKSARPAA  
HLA-A24:02 EWNGMEWNGI  
HLA-B08:01 QDKEALT  
HLA-C07:01 SSSGGGGSG  
HLA-B35:02 EPAPTTPEEPT  
HLA-A24:02 AVPAGLQW  
HLA-A01:01 ATDVTGGK  
HLA-A01:01 ISDLTEQIG  
HLA-C07:01 GSQEKQGKS  
HLA-C07:01 LSGGAAPPP  
HLA-DQA105:C LQRSRGA AAAASA  
HLA-DQA105:C GVGLSGGAAPPP  
HLA-DQA105:C TQGVVVQPAAA\  
HLA-DQA105:C AAAAAGSSSSGG\  
HLA-DRB111:0 YVFHAVFSLIRWK  
HLA-DQA105:C RGRFLSGPVSVS\  
HLA-DRB111:0 LRVIVELHRKVSSI  
HLA-DRB111:0 QSQYYLAARNSL\  
HLA-DRB111:0 FSNFTIITQRVSLS  
HLA-DRB111:0 SNFTIITQRVSLSI/  
HLA-DQA105:C GEEETAAAGSSGI  
HLA-DQA105:C EYHQPPAPASVA  
HLA-DQA105:C HPGLHGPQAVPA  
HLA-DQA105:C LPHRNASAAAKKI

HLA-DQA105:C WLISRSGTIAEVG  
HLA-DRB104:0 LDNRFFTLTVTSLI  
HLA-DRB111:0 LWQWSSCRHIRR  
HLA-DQA105:C MDLQQLGALAVI  
HLA-DRB111:0 VAQMHS�FRHLC  
HLA-DQA105:C KKSARPAAGVGD  
HLA-DQA105:C SSGSVVSSVPKAC  
HLA-DRB104:0 QSGPFQSSSTPYL  
HLA-DRB111:0 PQCFYSKTKVMP  
HLA-DRB111:0 WLLFAAKRKQA  
HLA-DRB111:0 KNLFSRKFPFYKN  
HLA-DRB104:0 TSEVVRIQSSLQA  
HLA-DQA105:C DHAYHGHLSSLID  
HLA-DRB111:0 LFKLKPLSNKTATI  
HLA-DQA105:C LLIAAGRTIKVWD  
HLA-DQA105:C FQEKRAGVSHLQ  
HLA-DQA105:C TNEFHTSMALTG  
HLA-DRB104:0 RQIWKLSHSNPTI  
HLA-DRB111:0 GPKYMRNKQPF  
HLA-DRB111:0 ALLLIQVPRIQPC  
HLA-DQA105:C PGSVVEASSNLR  
HLA-DRB111:0 TGLQVLPLRPIPI  
HLA-DRB111:0 SFQHYRSVFYSFE  
HLA-DQA105:C PESSPLTASNTSL  
HLA-DQA105:C DSWGRIAEPQRS  
HLA-DQA105:C LLPFSTGPPTECVI  
HLA-DRB104:0 PHPVRYFDNLSLC  
HLA-DQA105:C FVVPWGFTRAHL  
HLA-DRB104:0 PSMFFELPDSFQ  
HLA-DQA105:C EDYSEGGPLYKNC  
HLA-DRB104:0 REKLLSGNDSSSK  
HLA-DRB111:0 DKKFLLLQELVEKI  
HLA-DQA105:C THRPLTGWFP  
HLA-DRB111:0 HILVEHQKIHSGE  
HLA-DQA105:C FSSWSYDKAKIDL  
HLA-DQA105:C WNGMEWNGIES  
HLA-DQA105:C SDSDSLAPPQH  
HLA-DQA105:C APPVTSARFPSW  
HLA-DRB104:0 RSLNEHLQALLTP  
HLA-DQA105:C QNKGQTWSPGL  
HLA-DQA105:C LTEQIGETGKNLQ  
HLA-DQA105:C PAPTTPEEPAPTT  
HLA-DQA105:C KSEGEKPKQGEG  
HLA-A24:02 SYIATLLYVF  
HLA-C07:01 YRHSQRASF  
HLA-C07:01 SRMDLQQL  
HLA-A01:01 QSSSTPYLY

|            |             |
|------------|-------------|
| HLA-A24:02 | YYLAARNSL   |
| HLA-C07:01 | IHFQHIWQK   |
| HLA-B35:02 | FPEGIPTL    |
| HLA-A24:02 | RFPSWVNF    |
| HLA-A24:02 | YFFCKCVPGF  |
| HLA-A24:02 | TWSPGLYLI   |
| HLA-C07:01 | FRHLCPSF    |
| HLA-A24:02 | KYMRNKQPFSW |
| HLA-B08:01 | NPRLRVIV    |
| HLA-C07:01 | VRTEGGSDV   |
| HLA-A01:01 | FLSALACY    |
| HLA-B35:02 | LPSPLALTS   |
| HLA-B08:01 | LQRSRGA     |
| HLA-B08:01 | WLISRSGT    |
| HLA-C07:01 | LRNHQPRET   |
| HLA-A24:02 | YYLTENDIERW |
| HLA-A01:01 | LSSLIDSSPY  |
| HLA-B35:02 | HPDLPTHRPL  |
| HLA-C07:01 | ERCSDSDSL   |
| HLA-B35:02 | FPGASYLV    |
| HLA-A24:02 | QWLDLSNNF   |
| HLA-B08:01 | SSNLRHGSF   |
| HLA-B35:02 | SPLTASNTSL  |
| HLA-B08:01 | MALTGCWSV   |
| HLA-B08:01 | AAKKLRNV    |
| HLA-A24:02 | FYAPGSEPV   |
| HLA-B35:02 | LAVAPDYVPPL |
| HLA-A24:02 | FYPGAGLGDL  |
| HLA-C07:01 | SLYNAKQML   |
| HLA-A24:02 | QYPVMLTAM   |
| HLA-C07:01 | KRAGVSHLQ   |
| HLA-C07:01 | VRQEQEPCFL  |
| HLA-B35:02 | WPASLLSVTNV |
| HLA-B35:02 | APASLQAM    |
| HLA-C07:01 | FRICSPLPW   |
| HLA-B08:01 | FPFYKNKA    |
| HLA-A24:02 | LYECSECQKAF |
| HLA-B08:01 | LPGSSFSKL   |
| HLA-C07:01 | LRCTVPPAV   |
| HLA-C07:01 | SRWVFSGM    |
| HLA-B35:02 | VPWGFTRAHL  |
| HLA-C07:01 | LHDPKNTHI   |
| HLA-C07:01 | FRTSSTCSC   |
| HLA-A24:02 | RIQSSLQAF   |
| HLA-C07:01 | SRQCRVDY    |
| HLA-C07:01 | SHLEKSLGT   |
| HLA-A24:02 | KQAEVWSGI   |

HLA-C07:01 GSSGRKQQF  
HLA-C07:01 TERETAMGM  
HLA-A01:01 TTQASPGPQVY  
HLA-C07:01 ASVAKIQLH  
HLA-A01:01 DTDVVEPLCF  
HLA-A24:02 IWKLSHSNPTI  
HLA-B08:01 EVKQQLEQAL  
HLA-B08:01 IPRGKEDQQAF  
HLA-C07:01 VSKELERQN  
HLA-A01:01 ATDVTGGK  
HLA-A01:01 ISDLTEQIG  
HLA-B35:02 VPGMGGDV  
HLA-DQA105:C LQRSRGA AAAASA  
HLA-DRB111:0 GLLYARLARAYRH  
HLA-DRB111:0 YVFHAVFSLIRWK  
HLA-DRB111:0 LRVIVELHRKVSSI  
HLA-DRB111:0 QSQYYLAARNSLI  
HLA-DQA105:C CFPGEGAGSEASI  
HLA-DQA105:C GEEETAAAGSSGI  
HLA-DQA105:C GLGDLGGGALGP  
HLA-DQA105:C EYHQPPAPASVA  
HLA-DRB111:0 GNEVLKMCRSLYI  
HLA-DQA105:C LPHRNASAAAKKI  
HLA-DQA105:C WLISRSGTIAEVG  
HLA-DQA105:C FSHEEIAMATVTA  
HLA-DQA105:C MDLQQLGALAVI  
HLA-DRB111:0 VAQMHS�FRHLC  
HLA-DQA105:C IVAALWTPASLLS  
HLA-DRB104:0 QSGPFQSSSTPYL  
HLA-DQA105:C RRQGAAFYAPGS  
HLA-DQA105:C ALPSWAFANLSSI  
HLA-DRB111:0 WLLFAAKRKQA  
HLA-DRB111:0 LPGSSFSKLLLPYR  
HLA-DRB111:0 KNLFSRKFPFYKN  
HLA-DRB104:0 TSEVVRIQSSLQA  
HLA-DQA105:C DHAYHGHLSLID  
HLA-DQA105:C PRVETEAPASLQA  
HLA-DRB111:0 LFKLKPLSNKTATI  
HLA-DQA105:C HLEKSLGTGLSSIL  
HLA-DRB104:0 AFAFEWTKTLPSF  
HLA-DRB111:0 TTSRWVFSGMRF  
HLA-DQA105:C HCDLFPGASYLVT  
HLA-DRB111:0 LAPVFRICSPLPW  
HLA-DQA105:C LLIAAGRTIKVWD  
HLA-DQA105:C FQEKRAGVSHLQ  
HLA-DRB111:0 LRGYFFCKCVPGF  
HLA-DRB104:0 TSCSWQSFRTSST

HLA-DRB111:0 IHFGHIWQKTLTV  
HLA-DQA105:C NDLSGSPVPGMC  
HLA-DQA105:C TNEFHTSMALTG  
HLA-DRB104:0 RQIWKLSHSNPTI  
HLA-DQA105:C IPTLHFSGELSTI  
HLA-DRB111:0 GPKYMRNKQPF  
HLA-DRB104:0 AAYFGVYDTAKG  
HLA-DQA105:C DVRTEGGSDVIIT  
HLA-DQA105:C PGSVVEASSNLR  
HLA-DRB111:0 QYPVMLTAMEKI  
HLA-DRB111:0 IVELQIILEKYLAV  
HLA-DQA105:C PESSPLTASNTSL  
HLA-DRB111:0 IERWIKEHREYSTI  
HLA-DQA105:C LLPFSTGPPTECVI  
HLA-DQA105:C THCDLETSGETVTV  
HLA-DQA105:C FVVPWGFTRAHL  
HLA-DQA105:C KTTCFLSALACYC  
HLA-DQA105:C ERETAMGMIDV  
HLA-DQA105:C THRPLTGWFCV  
HLA-DRB111:0 HILVEHQKIHSGE  
HLA-DRB111:0 EEKIFGRGSRQCR  
HLA-DQA105:C SDSDSLAPPQHLI  
HLA-DQA105:C APPVTSARFPSW  
HLA-DQA105:C QNKGQWSPGL  
HLA-DRB104:0 QALRIQDIELKSV  
HLA-DQA105:C IPPKSEGLLIPRGK  
HLA-DQA105:C LTEQIGETGKNLQ  
HLA-DRB104:0 TKLDHIQEQLVSK  
HLA-C05:01 LADLASPFH  
HLA-C05:01 MIDMETEML  
HLA-C05:01 KSDRIVNETV  
HLA-C05:01 KSDFSKDVAV  
HLA-A25:01 EVFPVDLMY  
HLA-C05:01 SIDITSVL  
HLA-B27:05 GRNSPAPAVR  
HLA-B44:02 QELHVPSDKL  
HLA-A25:01 EVKNSDCVLSF  
HLA-B44:02 CEEDNGGCY  
HLA-A25:01 MLAGAILGGAY  
HLA-B44:02 GEYLPSKGV  
HLA-C05:01 QQDVSQNTV  
HLA-C05:01 FLSNPHFL  
HLA-B44:02 YENAKLLSA  
HLA-C05:01 SFDFLAQKL  
HLA-C05:01 VTENKVKNL  
HLA-C05:01 EPDHTTVNN  
HLA-B27:05 GQLGWLLPN

HLA-A25:01 TVNPCSGLY  
HLA-B44:02 LEIVNKQGH  
HLA-DQA104:C NTVSRGIAPAPAL  
HLA-DQA104:C LAFMLAGAILGG/  
HLA-DRB104:0 NPHFLNADPVLA|  
HLA-DQA104:C GRNSPAPAVRAA  
HLA-DRB108:0 ETEMLKILSPLDRI  
HLA-DRB108:0 VDLMYRPWKHA  
HLA-DRB108:0 FDFLAQKLQFYQF  
HLA-DRB108:0 LEIVNKQGHTKVL  
HLA-DRB104:0 KSDFSKDVAVQV|  
HLA-DQA104:C DALCEFDAVLADI  
HLA-DRB108:0 NHYMEQILNVSH  
HLA-DRB104:0 CYHLCLLSPSEPFY  
HLA-DRB108:0 NETLYENAKLLSA`  
HLA-DRB108:0 PGQLGWLLPNQI  
HLA-DRB104:0 LSWYNGTVNPCS  
HLA-DRB108:0 LELTLAKVEKEKH'  
HLA-DRB108:0 VGNNVLVIDGQC  
HLA-DQA104:C RHSIDITSVLWNC  
HLA-DRB108:0 QRELLQHQELHV  
HLA-DRB104:0 DHTTVNNSTSTQ  
HLA-A02:01 MLSWVYFWI  
HLA-A02:01 FLLGGWKAL  
HLA-A02:01 ILNPISIFM  
HLA-A02:01 RLRGFVDEV  
HLA-B07:02 LPHLHLGLAV  
HLA-A02:01 KVMALNSAEKV  
HLA-B07:02 SPAAAAAAAAAV  
HLA-C07:02 LRGHMVRYL  
HLA-A02:01 LLLQADKAGL  
HLA-B44:02 AEKATSDEKY  
HLA-C07:02 VFKAHRIVL  
HLA-B44:02 NEKDSVSNI  
HLA-B07:02 MPTDGEKDHEL  
HLA-A02:01 TVFSSLCLNLI  
HLA-B07:02 KPPIPPLHQF  
HLA-C07:02 FTHEQIMRRY  
HLA-C07:02 VRGPQGPE  
HLA-A02:01 SVSNTATEI  
HLA-C07:02 QRLTFLKQQ  
HLA-B07:02 KPQGPPQQ  
HLA-C07:02 ILTAHKRIH  
HLA-A02:01 VIAHDSGDPPL  
HLA-DRB115:0 RGHMVRYLMRSI  
HLA-DQA101:C AAAAAAAAAVAV/  
HLA-DRB115:0 HRIVLFASSGYFKI



HLA-DRB115:0 ATLMVMLS WVY  
HLA-DRB115:0 SSLCLNLIPHHL YF  
HLA-DQA101:C AARRSVARLLLQA  
HLA-DRB113:0 IKVMALNSAEKV  
HLA-DRB115:0 FTVILNPISIFMTH  
HLA-DQA101:C DSVSNTATEIKEG  
HLA-DRB115:0 IPPLHQFSSWESR  
HLA-DRB115:0 FHLPHLHLGLAVA  
HLA-DQA101:C VLLWGAAVFLLG  
HLA-DRB115:0 FTHEQIMRRYGTI  
HLA-DQA101:C VSNTATEIKEGQC  
HLA-DRB115:0 KAFKRSSILTAHKF  
HLA-DQA101:C ESLSAVADIIVRGF  
HLA-DRB115:0 KFETARRLRGFVC  
HLA-DQA101:C YEQFRDLELRVIAI  
HLA-DRB115:0 QQQLLATKEQRL  
HLA-DQA101:C SASQERSLDEAM  
HLA-DQA101:C TATEIKEGQQSGT  
HLA-DRB113:0 GPPQQGGNKPQ  
HLA-B44:03 MENYVAQRY  
HLA-A11:01 TTYIFWLAAK  
HLA-B35:01 WPPALAMPM  
HLA-A29:02 NFWFQPADY  
HLA-B35:01 LPVGMTVRF  
HLA-A11:01 KIFWEVFHK  
HLA-B35:01 YPQPGNDGY  
HLA-B35:01 LALTEVLAF  
HLA-A29:02 GVLDHGYRY  
HLA-A11:01 VVYALAEMLK  
HLA-A11:01 SVPVPVHCFK  
HLA-A11:01 KVAVTTTPFK  
HLA-A11:01 VTSSYPVSMK  
HLA-A11:01 SSSLALLPLK  
HLA-A29:02 YSFHSEQFVY  
HLA-A29:02 RVIANCHEY  
HLA-B35:01 SAALGSLGY  
HLA-A11:01 STAALPENAK  
HLA-B35:01 NAWGHQHGY  
HLA-B35:01 LAVADGLFM  
HLA-A29:02 SFGCDRALY  
HLA-A29:02 YAFRNPAIGY  
HLA-A11:01 GVPTSFVPK  
HLA-A11:01 KSLMSNHQK  
HLA-A11:01 LLAGHNYMLK  
HLA-A29:02 LYASHLADY  
HLA-B44:03 RELQVGCIW  
HLA-A11:01 TVSFLLQGK

|            |              |
|------------|--------------|
| HLA-A11:01 | ASARGSLRK    |
| HLA-A11:01 | GVLWEQYLQK   |
| HLA-A11:01 | MMMGNLVMFR   |
| HLA-A11:01 | QVHDYLHSK    |
| HLA-B35:01 | NAAKMMLIM    |
| HLA-A11:01 | FIWLIRSLYK   |
| HLA-A11:01 | VLCDPMPK     |
| HLA-B35:01 | LPAEVWETL    |
| HLA-A29:02 | ILAELLMGY    |
| HLA-A11:01 | ISLVLGIMAK   |
| HLA-B44:03 | GEIVMVHEHW   |
| HLA-A29:02 | HLHDPVLY     |
| HLA-B35:01 | YAGLMVAIF    |
| HLA-A29:02 | LMQVLNTHY    |
| HLA-A11:01 | STDGECLVK    |
| HLA-A11:01 | RVADRPDIKK   |
| HLA-B35:01 | MPPAPVLHF    |
| HLA-A11:01 | YSKGRVLYK    |
| HLA-A11:01 | FIDNPVNF EK  |
| HLA-B44:03 | AELHLNNEF    |
| HLA-A11:01 | GTSGVDCN HK  |
| HLA-A11:01 | KLAQRLHIHK   |
| HLA-A11:01 | KAFRCPTYFR R |
| HLA-B44:03 | QEMGLLTFRDI  |
| HLA-A11:01 | LLYGLHHSK    |
| HLA-A11:01 | MLSSELICK    |
| HLA-A11:01 | TVPEAIRSNK   |
| HLA-B35:01 | VPQKHVTFY    |
| HLA-B35:01 | TPVAFLHNF    |
| HLA-A11:01 | MTATTPETVK   |
| HLA-A11:01 | FTLHSKLSK    |
| HLA-B44:03 | TELTEELGW    |
| HLA-B35:01 | CPNAHLPVL    |
| HLA-A11:01 | SLSSSREEAK   |
| HLA-B35:01 | LPLGVPPPQF   |
| HLA-B44:03 | LELLIRTGW    |
| HLA-B35:01 | NSMVGELVY    |
| HLA-A11:01 | STGRRQGSHHK  |
| HLA-A11:01 | AVMDQRPINY   |
| HLA-A11:01 | VTQRFRLSR    |
| HLA-A11:01 | AQSLKNLGFK   |
| HLA-B35:01 | HASSFNCNF    |
| HLA-A11:01 | KTKDVKNPEK   |
| HLA-B35:01 | NPCLVPYAL    |
| HLA-B35:01 | MPSHTHSSV    |
| HLA-A11:01 | KTVAALWSGDK  |
| HLA-B44:03 | KETDSVYGEW   |

|            |             |
|------------|-------------|
| HLA-A11:01 | GSTPRTPSK   |
| HLA-B35:01 | SPDEAQA AH  |
| HLA-A11:01 | GTLVLGGGK   |
| HLA-B35:01 | TACTIQTAF   |
| HLA-A11:01 | AVVCCYTDK   |
| HLA-B35:01 | RAFLEQLPM   |
| HLA-A11:01 | HIRHARSCVYK |
| HLA-A11:01 | SIGIDIPVPIK |
| HLA-A11:01 | ATWKTSLSR   |
| HLA-B35:01 | RASITHVPF   |
| HLA-A11:01 | STIFLNGNHER |
| HLA-A11:01 | QMHPVTNPAK  |
| HLA-B35:01 | MPWRLTGRSRY |
| HLA-B35:01 | LVIQYTSQGRY |
| HLA-A11:01 | VVGMLDPPCK  |
| HLA-B44:03 | AEIKNLKEQI  |
| HLA-A11:01 | FISGKRWAK   |
| HLA-B35:01 | FAFNMGSTT   |
| HLA-A11:01 | HTAREFSEEDK |
| HLA-A11:01 | RTAFGAVCWR  |
| HLA-A11:01 | GNIDIMSLK   |
| HLA-A11:01 | MLWMGIQAK   |
| HLA-A11:01 | ESSMSSHMK   |
| HLA-B35:01 | CPGPPVGPIKF |
| HLA-A11:01 | GTMFDCETCR  |
| HLA-A29:02 | LLWALSLLW   |
| HLA-A11:01 | RLPSNLHPIK  |
| HLA-A29:02 | LYIFILALM   |
| HLA-A11:01 | HIFKICHQHTK |
| HLA-B44:03 | GEIDEQIERY  |
| HLA-A11:01 | STASTALCMAR |
| HLA-A11:01 | SLLGKSNHK   |
| HLA-B44:03 | HEGCVCDAGF  |
| HLA-A11:01 | PSYIQLSRK   |
| HLA-A29:02 | QFNGCQKVY   |
| HLA-A11:01 | GILMNDVGK   |
| HLA-B35:01 | MAVAGGIMG   |
| HLA-A11:01 | TVITHHCCER  |
| HLA-A11:01 | QMHPVTTPGK  |
| HLA-A11:01 | RVFYVSQRVAK |
| HLA-A11:01 | KSQAMRIIR   |
| HLA-B44:03 | AELLQDEYSGW |
| HLA-B44:03 | REDIQNAAW   |
| HLA-A11:01 | GGMLRGIK    |
| HLA-A11:01 | ELNHPATSYLK |
| HLA-A11:01 | YVAQATHLR   |
| HLA-B35:01 | ISFRCNDPM   |

|            |             |
|------------|-------------|
| HLA-B35:01 | LPVLAPSSS   |
| HLA-A11:01 | CVHQLLLQNK  |
| HLA-A29:02 | RVDGNCQIIGY |
| HLA-A11:01 | CLLWACKVCK  |
| HLA-A29:02 | FVTRADKFQMY |
| HLA-A29:02 | ALLTQIQRY   |
| HLA-A11:01 | KAFGDILHR   |
| HLA-B44:03 | REYWRRLLW   |
| HLA-A11:01 | AQQDLFWDIK  |
| HLA-B35:01 | DVQTDSVTF   |
| HLA-A11:01 | ILAHFLCGTK  |
| HLA-B35:01 | LPVLLDFGT   |
| HLA-B44:03 | QEQLRHQERY  |
| HLA-A11:01 | AVCRALIEER  |
| HLA-A29:02 | PLRPILGPRKY |
| HLA-B35:01 | FVVQLQDPW   |
| HLA-B35:01 | IPVPTPPQIAT |
| HLA-B35:01 | LAMSAITVI   |
| HLA-A11:01 | ELMRYCTTK   |
| HLA-A29:02 | MMWGTLTICF  |
| HLA-A11:01 | RTLGLIDASR  |
| HLA-B44:03 | WETYGELSPW  |
| HLA-B44:03 | DENGNAPAL   |
| HLA-B44:03 | LEHLKNLAF   |
| HLA-A11:01 | STNICELCTCR |
| HLA-B44:03 | DECSAAFLL   |
| HLA-B44:03 | CEISLADAGTY |
| HLA-B35:01 | AIIQHHPF    |
| HLA-A29:02 | KSLMGTYRY   |
| HLA-A29:02 | YITEADGKEVY |
| HLA-B44:03 | KEVWDKLWM   |
| HLA-A11:01 | IITAICHLR   |
| HLA-B44:03 | QEHGGWAVII  |
| HLA-B35:01 | MSRDTKLIM   |
| HLA-B44:03 | IENCGLLQI   |
| HLA-A11:01 | ASYAVILCCIR |
| HLA-A11:01 | AVQKLLTGR   |
| HLA-B44:03 | WEVCRELW    |
| HLA-C16:01 | ITFEIGAPL   |
| HLA-A11:01 | KIHILQKHGK  |
| HLA-A11:01 | KGPLVMLNK   |
| HLA-A29:02 | LFWVGHMVM   |
| HLA-B35:01 | MAPQGRMGF   |
| HLA-B44:03 | EDITNFQGRW  |
| HLA-B35:01 | VPTAGVPSSLF |
| HLA-B35:01 | CVNCSREAM   |
| HLA-B35:01 | FQGFAAAEF   |

|            |             |
|------------|-------------|
| HLA-B35:01 | KPVHLRLSSF  |
| HLA-B44:03 | MEFVPRQLGL  |
| HLA-A11:01 | ALKEEVISRK  |
| HLA-A11:01 | VVSDAVWDVR  |
| HLA-A11:01 | QIHQRNHTEEK |
| HLA-A11:01 | VVWWIRASNTK |
| HLA-B35:01 | QAWESPAAE   |
| HLA-A11:01 | LVSRQCMEDIK |
| HLA-A11:01 | YACRRYYR    |
| HLA-B44:03 | YEDSRGQRF   |
| HLA-B35:01 | LPGIFDDIH   |
| HLA-B44:03 | AESATCQAGA  |
| HLA-B35:01 | TPQPGCALVM  |
| HLA-A11:01 | GTILNWTER   |
| HLA-B44:03 | SELITETI    |
| HLA-B35:01 | HTSPETAHRLF |
| HLA-B44:03 | GEASDLPRM   |
| HLA-B44:03 | AEICLHPPT   |
| HLA-B35:01 | YALRVNLSVVL |
| HLA-B44:03 | IEIYYATTSVI |
| HLA-A29:02 | HLYYYCSLH   |
| HLA-A29:02 | QIHKKRHCSSY |
| HLA-B35:01 | MPNLKDKLH   |
| HLA-B35:01 | LAANMLLLL   |
| HLA-B35:01 | DGEEDPCDY   |
| HLA-B35:01 | VAVEVGDAE   |
| HLA-B44:03 | GESLGAFPV   |
| HLA-A11:01 | KTARLQDK    |
| HLA-B44:03 | LENGTLYFHI  |
| HLA-B44:03 | HEIKDVLVWNN |
| HLA-B35:01 | LPLDQNGNNL  |
| HLA-B35:01 | YPFTSVPLGR  |
| HLA-B44:03 | GEWGLVGI    |
| HLA-B44:03 | SEVQRLEGEL  |
| HLA-A11:01 | RTCSECLAH   |
| HLA-A11:01 | SQHACTSGR   |
| HLA-B35:01 | EPVRSRQPINM |
| HLA-B35:01 | MPSLLGQQG   |
| HLA-B35:01 | YNADMTTSVDF |
| HLA-A11:01 | PSQPEGLCK   |
| HLA-A11:01 | RSDGSDSPEK  |
| HLA-B35:01 | LATWLIHPS   |
| HLA-B44:03 | EEVASCDQEV  |
| HLA-A11:01 | MMTAILER    |
| HLA-B44:03 | LEFLSSTSH   |
| HLA-A11:01 | HSASPEPAPR  |
| HLA-B44:03 | VEISHRLRH   |

|            |             |
|------------|-------------|
| HLA-B44:03 | LEAPGRLLI   |
| HLA-B35:01 | LRISRPAP    |
| HLA-B35:01 | LPKISHLTGM  |
| HLA-B35:01 | FAVGEAWAPV  |
| HLA-B35:01 | MASFPLL     |
| HLA-B35:01 | YACSSGHHEL  |
| HLA-A11:01 | ALGATEEEEEK |
| HLA-B35:01 | DAVSSCTGL   |
| HLA-B35:01 | QCIDEFEAM   |
| HLA-A29:02 | KMDPWLLA    |
| HLA-A11:01 | KTVLDLTR    |
| HLA-B44:03 | QELHLALKQEH |
| HLA-B35:01 | TVRLDESSM   |
| HLA-C16:01 | IAHLEQNGSPL |
| HLA-C04:01 | SYDEDIMGQLV |
| HLA-C16:01 | ISFCINGQPV  |
| HLA-C16:01 | VARDCGMTL   |
| HLA-A29:02 | SNNNTRITY   |
| HLA-A11:01 | RAQARDHATNR |
| HLA-B35:01 | QAVGIGIF    |
| HLA-B44:03 | GCYHLHLAAW  |
| HLA-A29:02 | TMSNITAGH   |
| HLA-A11:01 | TVDDYRLWH   |
| HLA-A11:01 | TINWTLLEKQR |
| HLA-B35:01 | IASLTVLEI   |
| HLA-B44:03 | RELHIETI    |
| HLA-A11:01 | HSDEQNDTQK  |
| HLA-C16:01 | CTDPGLMPL   |
| HLA-B44:03 | REGTRVQSM   |
| HLA-B35:01 | APNKCCAPSAI |
| HLA-A29:02 | LTDSTTAPNF  |
| HLA-A11:01 | EVQEETTRREK |
| HLA-B44:03 | NELASAAARGG |
| HLA-B35:01 | CSADHSNLSF  |
| HLA-B44:03 | REGHTLIL    |
| HLA-A11:01 | PTKKCNGLEEK |
| HLA-C16:01 | WTYFTQTGV   |
| HLA-C16:01 | FGYRSGGM    |
| HLA-B35:01 | IPPEHSEII   |
| HLA-B35:01 | MVLSIVLTSLL |
| HLA-B35:01 | LPSVLVLNN   |
| HLA-C16:01 | VLPPPPRPV   |
| HLA-B44:03 | IENGNGTVRC  |
| HLA-C16:01 | STHDSGWTV   |
| HLA-A11:01 | DSNDSVEADK  |
| HLA-B35:01 | CPKMHISIW   |
| HLA-B35:01 | YCIDPNVLL   |

HLA-B35:01 LPSNSCPN  
HLA-A29:02 SLCGGEPNF  
HLA-A11:01 RHGEPPLIK  
HLA-B44:03 GETACLDCQV  
HLA-B44:03 QEEERCEQQL  
HLA-C16:01 SSDPASGPSV  
HLA-B44:03 KEVITVSCG  
HLA-C16:01 WAKERTLTCL  
HLA-B35:01 LQVNPNTAL  
HLA-A11:01 SSQEQRDGSR  
HLA-B35:01 NVNDNNVL  
HLA-C16:01 SSHNRVNACL  
HLA-B35:01 LVSGKQHSLEL  
HLA-B35:01 KPHGVAVNL  
HLA-A11:01 TSQKNTLRKHR  
HLA-B35:01 SPCMQLLG  
HLA-C16:01 FSLDDLGPAG  
HLA-B44:03 KQHLVDADGII  
HLA-B44:03 REDEDVLEQ  
HLA-C04:01 IGDDDEDIG  
HLA-DRB107:0 LLSHIRHASSLSLS'  
HLA-DRB107:0 RRIFNMSRDTKLI|  
HLA-DRB107:0 HPATSYLKATHPE  
HLA-DRB107:0 VVWWIRASNTKL  
HLA-DRB107:0 HPFFKTINWTLLE  
HLA-DRB107:0 EATWKTSLSRIVIF  
HLA-DRB107:0 RKSIEIYATTSVIL  
HLA-DRB107:0 VHHPSFLSYTVSFI  
HLA-DRB107:0 VTGHFTFTLHSKL  
HLA-DRB108:0 RFTLKKLAQRLHII  
HLA-DRB107:0 FQVYKLLYASHLA  
HLA-DRB108:0 NLRTRLFSRHHHH  
HLA-DRB108:0 ALRRVLTAYAFRN  
HLA-DRB107:0 FQSMSTASTA  
HLA-DRB108:0 RYACRRYRLLQS  
HLA-DRB108:0 QKVYTKSSHLKAF  
HLA-DRB107:0 TLYFHISMSSGQ  
HLA-DRB108:0 CSLLAAYTRKTAR  
HLA-DRB108:0 LALCLLVRRTRRH  
HLA-DRB108:0 QKIFHINPRLPSNI  
HLA-DRB107:0 VLFMMVLSIVLTS  
HLA-DRB107:0 LREHTSWVLLAAI  
HLA-DRB108:0 MPGFIWLIRSLYK  
HLA-DRB108:0 LHCIRLSIPRVFYV  
HLA-DRB108:0 LQTKLRISSRPAFM  
HLA-DRB107:0 FFIVYALRVNLSV  
HLA-DRB107:0 GFFIVYALRVNLS\

HLA-DRB108:0 DYFKKRLKNIFLK1  
HLA-DRB108:0 YLLLLAKKARGKP'  
HLA-DRB107:0 KAFGDILHRSESV  
HLA-DRB107:0 QQLVQDIASLTVL  
HLA-DRB108:0 EADYVAQATHLR  
HLA-DRB107:0 HGYRIQIHSPLGIH  
HLA-DRB108:0 FRCPTYFRRHVKT  
HLA-DRB108:0 TTYIFWLAAKNRA  
HLA-DRB108:0 NARVIKWLYGLR(  
HLA-DRB107:0 HVPFYDLVSTRKK  
HLA-DRB108:0 PARLRTLHNLVIQ  
HLA-DRB107:0 VTQRFRLSRDRK\  
HLA-DRB108:0 KGLHKVWKKKLS'  
HLA-DRB108:0 QKTFYTLRAQARI  
HLA-DRB107:0 TVEVQAVLSALLT  
HLA-DQA106:C VQIGKAGLAMSA  
HLA-DRB107:0 IVFCRMLGYSKGF  
HLA-DRB107:0 ISPIKLHLSVLSSS  
HLA-DQA102:C LLDWVGAPAFAV  
HLA-DRB107:0 HLRSTPTTIFPIR\  
HLA-DRB107:0 AVLWLWSSHNR\  
HLA-DRB107:0 FVVCFTYFHIFKIC  
HLA-DRB107:0 NNDRVIRWIAIK  
HLA-DRB108:0 ISEVLRRKFALKEE  
HLA-DRB107:0 HTHSSVQRTRSLF  
HLA-DRB107:0 HLNKNAFSPATM,  
HLA-DRB107:0 FDIYYVVSFHSEQI  
HLA-DRB108:0 RYKLLLYGLHHSKI  
HLA-DRB107:0 MQVLNTHYVAPF  
HLA-DRB108:0 RGLRKRSPMA  
HLA-DQA102:C GESLGAFPVAAQ'  
HLA-DRB108:0 GTMKIHILQKHGI  
HLA-DRB107:0 FLLILALTEVLAFAI  
HLA-DRB108:0 CQVIHRLPMPNLI  
HLA-DRB108:0 GNIDIMSLKRMLI  
HLA-DRB108:0 VGMTVRFVRVACA  
HLA-DQA102:C WGNELASAAARC  
HLA-DRB108:0 WRRLLWKQNIWR  
HLA-DRB108:0 HTNYVRNSRAVG  
HLA-DRB108:0 ISLVLGIMAKLLPL  
HLA-DRB108:0 RPSYIQSLRKAKEF  
HLA-DRB107:0 EIKLPVKWTVPEA  
HLA-DRB108:0 PVNFEKMRMIAN  
HLA-DRB108:0 LECWHQLQPRRV  
HLA-DRB107:0 LLLKYREGHTLILS'  
HLA-DRB108:0 FMPWRLTGRSRY  
HLA-DRB108:0 MKQGLVRRVLEA



HLA-DRB108:0 QIERYRRVEKLRN  
HLA-DRB108:0 GDSKAVQKLLTGI  
HLA-DRB108:0 KSQAMRIIRTVGC  
HLA-DRB108:0 WEVFHKLPLEKKI  
HLA-DQA102:C QLAAEAAARLEA  
HLA-DRB108:0 CNYILSLARLADLI  
HLA-DRB107:0 IKITVVWLISIGIDI  
HLA-DRB107:0 CHYQTIPPHILLAT  
HLA-DRB107:0 KMDPWSSLAVLC  
HLA-DRB108:0 REKIKKSLMSNHC  
HLA-DRB108:0 TSQKNTLRKHRV  
HLA-DRB108:0 ALDFISGKRWAK  
HLA-DRB107:0 YFGLFSYCVGNM  
HLA-DRB108:0 LLWACKVCKRKS  
HLA-DRB107:0 DRVEVYSRSAALC  
HLA-DRB108:0 HKSLMGTARYMS  
HLA-DRB108:0 HKAMETLRRSMS  
HLA-DRB108:0 KGPLVMLNKPQC  
HLA-DRB108:0 HHLPLRPILGPRK  
HLA-DRB107:0 LGWLRELSLQGI  
HLA-DRB108:0 KNTSIRIGPARRS  
HLA-DQA102:C QSLFQGFAAAEFF  
HLA-DRB107:0 AVADGLFMLVLP  
HLA-DRB107:0 LPSLEFLSSTSHGT  
HLA-DRB107:0 QLPSLEFLSSTSHC  
HLA-DRB108:0 IITAICHLRERGLEI  
HLA-DRB108:0 ALPKISHLTGMAT  
HLA-DRB108:0 YGGHLVSRRTAC  
HLA-DRB107:0 LERCVRAPSSGLA  
HLA-DRB108:0 DPAVLYNLKERYA  
HLA-DQA102:C MLEASGDAALYA  
HLA-DQA102:C GITFEIGAPLEALD  
HLA-DRB108:0 VKNLILELKPHGV  
HLA-DRB108:0 KCQRAIQHHHPF  
HLA-DRB107:0 EHLYYYCSLHGIPF  
HLA-DRB107:0 YQVHDYLHSLKCS  
HLA-DRB108:0 NKELRTKRKFSLD  
HLA-DRB108:0 TPLIYACSSGHHEI  
HLA-DRB107:0 VCVLLWALSLLW  
HLA-DRB108:0 LGVEISHRLRHSN  
HLA-DQA106:C FQDMAVAGGIM  
HLA-DRB107:0 PTPPQIATSTSLA  
HLA-DRB108:0 YRLWHTLTGHSG  
HLA-DRB108:0 TVMVKYTSHYPQ  
HLA-DRB108:0 MMMGNLVMFR  
HLA-DRB107:0 DKYLKETCSVPVP  
HLA-DRB107:0 KYLKETCSVPVPV

HLA-DRB107:0 WDKYLKETCSVP  
HLA-DRB107:0 TWDKYLKETCSVI  
HLA-DRB107:0 FTWDKYLKETCS\  
HLA-DRB108:0 MMTAILERLSTLS  
HLA-DQA102:C ANGIFSTAALPEN  
HLA-DRB108:0 KGCYHLHLAAWK  
HLA-DRB107:0 MRYCTTKDIILPFI  
HLA-DRB107:0 SNDPVVYALAEM  
HLA-DRB107:0 SKYLQVNPNTAL1  
HLA-DRB108:0 NQIHKKRHCSSYL  
HLA-DQA102:C GYSSAVAPKTVA/  
HLA-DRB108:0 PRTFLVSGKQHSL  
HLA-DRB107:0 CDRALYQEHAKR  
HLA-DRB107:0 FLGLLASYAVILCC  
HLA-DRB108:0 QEQLRHQERYRK  
HLA-DRB107:0 APCMRAFLEQLPI  
HLA-DRB107:0 SMSSHMKIRSQS  
HLA-DRB107:0 HQDQIQQVVNH0  
HLA-DRB107:0 LISFSYLLILKTVLD  
HLA-DQA102:C FLGEVGNAAKMM  
HLA-DRB107:0 LHIETIAASSTPTP  
HLA-DRB107:0 GSDLLLFVVGHM  
HLA-DRB107:0 CVLGFWATVITHI  
HLA-DRB108:0 HCFVTRADKFQM  
HLA-DRB107:0 ECSAAFLLSVMAF  
HLA-DRB108:0 RYRIRVSTHDSGV  
HLA-DRB108:0 KSMQLLKNLQCA  
HLA-DRB107:0 YMLKIEYSANISS  
HLA-DRB107:0 LLGRIFALLGNLY  
HLA-DRB107:0 HLNNNEFTVLEA1  
HLA-DQA102:C VQEHGGWAVIIS  
HLA-DRB108:0 AVRLKEKKLVKEV  
HLA-DRB108:0 TLLREGPVLKISFR  
HLA-DQA102:C LGPGVPTAGVPS!  
HLA-DRB107:0 LIWFTLTDSTTAPI  
HLA-DQA102:C RTGWLPEAAFLAI  
HLA-DRB108:0 QELHLALKQEHR/  
HLA-DRB108:0 KLFVADLQRVIAN  
HLA-DRB108:0 SRSAIRIGIYALHLI  
HLA-DQA102:C VLDENGNAPALLI  
HLA-DRB108:0 RQHMLWMGIQ/  
HLA-DRB108:0 EYIKGGMLRGIK5  
HLA-DRB107:0 IHLYQTFVVQLQC  
HLA-DRB107:0 NTIPLLYGILAHFL  
HLA-DRB108:0 WEQYLQKYISPQI  
HLA-DRB107:0 PETKIWNMSMVGE  
HLA-DQA102:C IFRSGALPVLCDI

HLA-DRB107:0 GELSPWIEETRAL  
HLA-DRB108:0 YADYAQSLKNLGI  
HLA-DRB108:0 RNLSSFQIHQRNF  
HLA-DRB108:0 MEQIGEVASVKA  
HLA-DQA102:C EEEYSAPLPVLAP  
HLA-DRB108:0 PIDISQLTKQHLVI  
HLA-DQA102:C PVLPGSHIAAEICL  
HLA-DRB108:0 EWGLVGIPGKRSI  
HLA-DRB107:0 FGYSWYKGERVD  
HLA-DRB107:0 PQPGCALVMTRM  
HLA-DRB108:0 HSEITNMAHLGV  
HLA-DQA102:C AFEPLVANGVPT  
HLA-DRB108:0 AAMGRQMMPSI  
HLA-DRB108:0 NEYKAEINKLKEQ  
HLA-DQA102:C GAGGASACSRCD  
HLA-DQA102:C RLLIGLSGVLTVG  
HLA-DRB108:0 YKTLRQIRQGNT  
HLA-DRB108:0 RMRVFKQLCYEC  
HLA-DRB107:0 TVCWTYFTQTGV  
HLA-DRB108:0 LTALKGALKEEVA  
HLA-DQA102:C VNGGKASPDEAC  
HLA-DQA102:C SVGSGSPYAYGVI  
HLA-DRB107:0 TQHQLALVQSEV  
HLA-DQA102:C QHACTSGRVAVE  
HLA-DQA106:C SMLTAVSVARDC  
HLA-DQA106:C VRREFQLDLDEIEI  
HLA-DQA102:C MAARTAFGAVCV  
HLA-DQA102:C RYNSSDPASGPS  
HLA-DRB107:0 GQRFMCSGPK  
HLA-DRB107:0 LALREGHSKLVED  
HLA-DRB108:0 AGQCMQNTPVA  
HLA-DRB108:0 IENCGLLQILKLQC  
HLA-DRB108:0 VHLHMPPAPVLH  
HLA-DRB108:0 PKMHISIWQCLS  
HLA-DRB108:0 MKDRLNLPSVLVI  
HLA-DQA102:C SVPLGRGAPGTR  
HLA-DRB108:0 GIFALCMLRDGTI  
HLA-DRB108:0 SFPLLLTLLTHCAC  
HLA-DRB108:0 WEVCRELWCLSK  
HLA-DQA102:C GSGFKMGEASDL  
HLA-DRB107:0 GSQEMGLLTFRD  
HLA-DQA102:C QFSDEGTCVAVM  
HLA-DQA106:C VKARLALLEVQEE  
HLA-DRB108:0 DCETCRNRYRKL  
HLA-DRB108:0 MENYVAQRYIEN  
HLA-DRB108:0 RTSTIFLNGNHER  
HLA-DRB108:0 LTYKYMIHEDSLN

HLA-DRB107:0 GIFDDIHGSHGRC  
HLA-DRB108:0 LRQYPPVTLVSRC  
HLA-DQA102:C LQNSDSSASAPNI  
HLA-DRB107:0 RTCSECLAHHPRT  
HLA-DRB108:0 VVCCYTDKILIACL  
HLA-DQA102:C ICEISLADAGTYYC  
HLA-DRB108:0 KQAVCRALIEERG  
HLA-DRB108:0 KENLHYTRVADRI  
HLA-DQA102:C SCCLDLGVPSISFC  
HLA-DQA102:C PFAFNMGSTTESI  
HLA-DRB107:0 AVGIGIFPNLGLVI  
HLA-DRB107:0 SKPTSHMTATTPF  
HLA-DRB108:0 TEMLYGSTPRTPS  
HLA-DRB107:0 REFGKDVLSSSGL  
HLA-DQA102:C IDMWVSLGCILAEI  
HLA-DRB108:0 ALSYLNPEVRSRQ  
HLA-DQA102:C EGFFSVPEDAVSS  
HLA-DRB107:0 VYRTYNADMSTS  
HLA-DRB107:0 LINPDTYCIDPNVI  
HLA-DQA102:C SHLYGPGETACLE  
HLA-DRB107:0 DSEICGVVSDAVV  
HLA-DRB108:0 QVGCWTTQPSP  
HLA-DRB107:0 NNTRITYALTEDT  
HLA-DQA102:C PVSRRHSASPEPAP  
HLA-DRB108:0 EDVLEQARRAHE  
HLA-DQA102:C LLSSSLGTSGVDCI  
HLA-DQA102:C QDEYSGWGIITW  
HLA-DRB108:0 RDETLSCVGLSPK  
HLA-DRB108:0 GKNPLQTCLSATM  
HLA-DRB107:0 DPPCKEVTGSIQL  
HLA-DRB108:0 SPNIVQDLNKSRE  
HLA-DRB108:0 RNKKHHYRELPAI  
HLA-DRB108:0 LKNKRNPCLVPYF  
HLA-DQA102:C AAQEQALGATEE  
HLA-DRB108:0 REDIQNAAWHKF  
HLA-DQA102:C SQPEGLCKAASLT  
HLA-DRB107:0 DHILTSELITETIRV  
HLA-DRB108:0 LPKVLGLQQSCVY  
HLA-DRB108:0 LEGILMNDVGKTI  
HLA-DRB108:0 LGTASKEMRLNV  
HLA-DRB108:0 GKEVYGRHQREIN  
HLA-DQA102:C REEWGTLDPAAQC  
HLA-DQA102:C VNPFFGSLMDVT  
HLA-DQA106:C ITDLGLTLYDEDI  
HLA-DRB108:0 GECLVAAAQCGH  
HLA-DRB108:0 QPADYNQCLQISI  
HLA-DQA102:C RSFGYRSGGMCC

HLA-DRB107:0 MLELETSQSPCM  
HLA-DQA102:C PIMGHGSQEPPN  
HLA-DRB108:0 ETKAKMTPTKKCI  
HLA-DQA102:C KVEEEGEIVMVHI  
HLA-DQA102:C HEGCVCDAGFVL  
HLA-DQA102:C ECGNNAQSPIDV  
HLA-DRB107:0 FWFSDGSLSDKSI  
HLA-DQA102:C DCYVCSGVPGRP  
HLA-DRB108:0 SLQKYMEHHCPN  
HLA-DQA102:C ANSLCGGEPNFLF  
HLA-DQA102:C HTLPLPLGVPPPC  
HLA-DQA102:C LRNGKLEEAPPPV  
HLA-DQA102:C VSDPKGPPAKIAF  
HLA-DRB108:0 AELQDWAKERTL  
HLA-DQA102:C ETDSVYGEWVPV  
HLA-DRB107:0 RLSGSASRNHHG  
HLA-DRB107:0 PIVDHTSPETAHR  
HLA-DQA102:C NDSVEADKSSPGI  
HLA-DQA102:C PENLEDAPLLPSN  
HLA-DQA106:C VLLDFGTNNEELL  
HLA-DRB107:0 FRELHTAREFSEEI  
HLA-DQA102:C KQARDSSRHSAS  
HLA-DQA102:C EIQFDDIGDDDEC  
HLA-DRB108:0 LGARLHHYDERSI  
HLA-DQA102:C QKQLSEEQNTGIS  
HLA-DRB108:0 ERCEQQLRREQEI  
HLA-C07:01 FRLPNQCVL  
HLA-B08:01 YLDNRFFTL  
HLA-B08:01 SLNEHLQAL  
HLA-C07:01 WRLTNVTGI  
HLA-B08:01 RLMKCRKSV  
HLA-B57:01 KTHHAPGSTAW  
HLA-C07:01 FRVLKTGQSM  
HLA-A01:01 VLEETEAQHLY  
HLA-C07:01 LRHFTGYHIEL  
HLA-B57:01 YSTPSMFF  
HLA-B57:01 RARGSYGF  
HLA-B08:01 SLHSRTSST  
HLA-B57:01 MNHEYMYW  
HLA-B57:01 RLMQDEIAW  
HLA-A01:01 YTDVNGYQI  
HLA-A01:01 LSDSRTALK  
HLA-B08:01 EMIQRLYGCL  
HLA-B57:01 FAKYDVDPRKW  
HLA-B57:01 KSVMQELEDY  
HLA-C07:01 IRCEKEEVA  
HLA-B57:01 KTFCEVDRSL

HLA-C06:02 LKSGHGKYL  
HLA-C07:01 RKSPRGRRR  
HLA-C07:01 QSSDRDLFV  
HLA-C07:01 VYSVDQRDT  
HLA-C07:01 SSDEKDSVL  
HLA-C07:01 FRSVSAEEPLC  
HLA-C06:02 CRPQCCQPV  
HLA-C07:01 ISLSKPVEL  
HLA-B57:01 HALDDGLF  
HLA-B57:01 ISAAEGL  
HLA-B08:01 LVKPSGTL  
HLA-B08:01 GLKPRQQDL  
HLA-B08:01 ELHTKKGKMDL  
HLA-C07:01 IRGAGAASR  
HLA-C07:01 SVNSPPPQP  
HLA-C06:02 IAKVFQIDV  
HLA-B57:01 RCYSTPSMF  
HLA-B08:01 IPTEKPTI  
HLA-C07:01 VSCGGSKGG  
HLA-C07:01 TISTEKPTT  
HLA-C06:02 DGYDPVQEN  
HLA-C06:02 PAPPHHPTV  
HLA-C06:02 PAKPPSQQP  
HLA-C07:01 LSGGAAPP  
HLA-DRB107:0 LDNRFFLTVTSLI  
HLA-DRB107:0 VISGLRHFTGYHIE  
HLA-DRB107:0 SSLPCISLSKPVELI  
HLA-DQA101:C RVLKTGQSMTLI  
HLA-DRB115:0 KIYIVGGYNWRLT  
HLA-DQA102:C SACPTSVSSAAAC  
HLA-DRB107:0 RKWIKQYTGINAI  
HLA-DRB107:0 FQEMIQRLYGCLI  
HLA-DRB107:0 TEAQHLYQSILPD  
HLA-DQA102:C NRCVTNSISAAEC  
HLA-DQA102:C KGDIRGAGAASRI  
HLA-DRB107:0 SLDRCYSTPSMFF  
HLA-DQA102:C GTNAVIAYTVQSS  
HLA-DRB107:0 KSQNRFYTDVNG  
HLA-DRB107:0 SRIALKSGHGKYL  
HLA-DQA102:C PCPRLNGVVMVEV  
HLA-DRB107:0 PGLVKPSGTLSLTI  
HLA-DRB107:0 HVYTFRSVSAEEP  
HLA-DRB107:0 SSFSTAKTSTSLHS  
HLA-DRB107:0 SLDGCYSTPSMFF  
HLA-DQA102:C DLVSGLSPTVAVL  
HLA-DRB107:0 KKTFCVDRSLLCI  
HLA-DQA102:C NSTDEEVASSLTI

HLA-DQA101:C RSLNEHLQALLTP  
HLA-DRB107:0 KGKMDLLASNGC  
HLA-DRB107:0 TSWPDLIAKVFI  
HLA-DQA101:C SVKEMLKSVMQE  
HLA-DQA101:C MDEGTIHALDD  
HLA-DQA101:C NRLMQDEIAWLF  
HLA-DQA102:C KEKGVGLSGGAA  
HLA-DRB107:0 GFKLKEVSSVNSP  
HLA-DRB115:0 MYWYRQDPGKC  
HLA-DRB107:0 GHGKYLGINDEL  
HLA-DQA101:C APPHHPTVIVPAF  
HLA-DQA102:C RCEKEEVATQSSE  
HLA-DQA102:C RGSYGFGGAGSG  
HLA-DQA101:C SSDEKDSVLNIAR  
HLA-DRB107:0 PGLHSFTDHQRLI  
HLA-DQA101:C KPTTPTEETTISTE  
HLA-DRB107:0 RDNCQYVYSVDC  
HLA-DRB115:0 PPGVVRKSPRGRI  
HLA-DQA102:C SCGGSKGGCVSC  
HLA-DQA102:C CRPQCCQPVCCC  
HLA-DQA102:C KPTIPTEKPTIPTEI  
HLA-DQA102:C QQPGPAKPPSQC  
HLA-C07:01 FRLPNQCVL  
HLA-B57:01 VAIGPREQW  
HLA-B08:01 YLDNRFFTL  
HLA-B57:01 MSLLDFSF  
HLA-B08:01 FILFHLLI  
HLA-B08:01 SLNEHLQAL  
HLA-B08:01 RRVKRFLSV  
HLA-C07:01 WRLTNVTGI  
HLA-C07:01 FRVLKTGQSM  
HLA-C07:01 SRFKMPKFKM  
HLA-C07:01 FRDECELLR  
HLA-B57:01 YSTPSMFF  
HLA-B08:01 IVKRKREDL  
HLA-B08:01 SLHSRTSST  
HLA-C07:01 FSIDQKEDV  
HLA-B57:01 KATKQLGF  
HLA-B57:01 RLMQDEIAW  
HLA-C07:01 IRNQNLKLYL  
HLA-A01:01 LSDSRTALK  
HLA-C07:01 VRNAEKAMTAL  
HLA-B57:01 VASGVPASF  
HLA-B08:01 EMIQRLYGCL  
HLA-B57:01 KAAALSTKI  
HLA-C07:01 LNSGYGKYL  
HLA-B57:01 KSVMQELEDY

HLA-C07:01 QSSDRDLFV  
HLA-B08:01 DLEERTPAM  
HLA-B08:01 RMLTHLTGSI  
HLA-C07:01 LRSKMGKWC  
HLA-C07:01 SSDEKDSVL  
HLA-C07:01 FRSVSAEEPLC  
HLA-C06:02 CRPQCCQPV  
HLA-B08:01 SLKTPPECL  
HLA-B57:01 HALDDGLF  
HLA-C07:01 FSSIMPPAM  
HLA-B08:01 LVKPSGTLSL  
HLA-B08:01 TPGTTHATVL  
HLA-C07:01 SVNSPPPQP  
HLA-C06:02 IAKVFQIDV  
HLA-C07:01 KATSNEKDS  
HLA-C07:01 VSCGGSKGG  
HLA-B08:01 IPPEKPTI  
HLA-C07:01 ISTATNSES  
HLA-B57:01 TSSGANTATN  
HLA-C07:01 LALDVDRIK  
HLA-C06:02 DGYDPVQEN  
HLA-DRB115:0 FHLLILGSYVRILS  
HLA-DRB107:0 LDNRFFTLTVTSLI  
HLA-DRB107:0 AAFTTAKAAALST  
HLA-DRB115:0 RHSMIRRVKRFLS  
HLA-DQA101:C RVLKTGQSMTLI  
HLA-DRB115:0 KIYIVGGYNWRLT  
HLA-DQA102:C SACPTSVSSAAAC  
HLA-DRB107:0 KATKQLGFIMAAI  
HLA-DRB107:0 FQEMIQRLYGCLI  
HLA-DQA101:C TPGTTHATVLT  
HLA-DQA102:C FEPLVASGVPASF  
HLA-DRB107:0 QKEDVDFLARFS  
HLA-DQA101:C MVRNAEKAMTA  
HLA-DRB115:0 SRFKMPKFKMLS  
HLA-DRB107:0 QFMAVKLSDSRI  
HLA-DRB107:0 DRMLTHLTGSI  
HLA-DQA101:C MCFSSIMPPAMA  
HLA-DRB107:0 FVEAFLKQCMSLI  
HLA-DQA102:C GTNAVIAYTVQSS  
HLA-DQA102:C LEERTPAMLSSAE  
HLA-DRB107:0 PGLVKPSGTLSLT  
HLA-DRB107:0 HVYTFRSVSAEEP  
HLA-DRB107:0 SSFSTAKTSTSLHS  
HLA-DRB107:0 SLDGCYSTPSMFF  
HLA-DQA101:C ESSTVSSGISTATN  
HLA-DQA102:C DELVGHSVAIGPF



HLA-DQA102:C NSTDEEVASSLTLI  
HLA-DQA101:C RSLNEHLQALLTP  
HLA-DQA102:C NEKDSVSNIAIEI  
HLA-DRB107:0 TSWPDLIAKVFQI  
HLA-DQA102:C LEEQYLGLALDVC  
HLA-DQA101:C SVKEMLKSVMQE  
HLA-DQA101:C MDEGTIHALDD  
HLA-DQA101:C NRLMQDEIAWLF  
HLA-DQA102:C ESSTTSSGANTAT  
HLA-DRB107:0 KKYLKDFEIVKRKF  
HLA-DQA102:C ENRLMQDEIAWI  
HLA-DRB107:0 GFKLKEVSSVNSP  
HLA-DRB115:0 FDLRSKMGKWC  
HLA-DRB115:0 ECELLRHPPAPHC  
HLA-DQA101:C SSDEKDSVLNIAR  
HLA-DQA102:C SMEETIISTEKPTII  
HLA-DRB107:0 DNSLSLKTPECLI  
HLA-DQA102:C SCGGSKGGCVSC  
HLA-DQA102:C CRPQCCQPVCCC  
HLA-C07:01 YRHPRNHIGKM  
HLA-C07:01 FRLPNQCVL  
HLA-B08:01 LLREHISVL  
HLA-B57:01 LAGALESVW  
HLA-B57:01 VAIGPREQW  
HLA-B08:01 YLDNRFFTL  
HLA-B08:01 SMRLYVGS  
HLA-C06:02 FRLNHDELA  
HLA-C07:01 NRYTESISV  
HLA-B08:01 SLNEHLQAL  
HLA-C07:01 FVYCHIHRI  
HLA-C07:01 SRSRRGYL  
HLA-C07:01 WRLTNVTGI  
HLA-C07:01 RRPHRPLRV  
HLA-C07:01 LHIDYIRYY  
HLA-B08:01 WARLLRPIL  
HLA-C06:02 RRFVRLAATTF  
HLA-C07:01 FRDECELLR  
HLA-B57:01 YSTPSMFF  
HLA-B08:01 SLHSRTSST  
HLA-C07:01 TLQTRPSLI  
HLA-A01:01 LSDSRTALK  
HLA-B08:01 FAVMRFSL  
HLA-B08:01 EMIQRLYGCL  
HLA-C07:01 LRSQDPHLPL  
HLA-A01:01 ATHMCFCFGSY  
HLA-C07:01 AREVAERKR  
HLA-C07:01 QYDGNSSFL

HLA-B57:01 KSVMQELEDY  
HLA-C06:02 LKSGHGKYL  
HLA-B57:01 LALEESGTF  
HLA-C06:02 FSNPDGNVSLI  
HLA-C07:01 QSSDRDLFV  
HLA-B08:01 MPTQLDMAM  
HLA-C07:01 PRQSPKRWR  
HLA-C07:01 SSDEKDSVL  
HLA-C07:01 FRSVSAEEPLC  
HLA-B08:01 VPKSKAAKEL  
HLA-C06:02 CRPQCCQPV  
HLA-C07:01 SASVPKPKDK  
HLA-B57:01 HQHVYGPW  
HLA-C07:01 IHTGAKHYK  
HLA-B57:01 RSQLGEKFQI  
HLA-B57:01 HALDDGLF  
HLA-B08:01 QLRGVKLL  
HLA-B08:01 LVKPSGTLSL  
HLA-C07:01 LSHYWTPCN  
HLA-C06:02 TYKASRAGV  
HLA-B08:01 ELHTKKGKMDL  
HLA-C07:01 SVNSPPPQP  
HLA-C06:02 IAKVFQIDV  
HLA-B08:01 MCSHHANCF  
HLA-B57:01 RTLAHSRPQTQ  
HLA-C07:01 VSCGGSKGG  
HLA-B57:01 WEVPFVTW  
HLA-C07:01 SAQRRSQGR  
HLA-C07:01 WSLGEDDHH  
HLA-B08:01 KLKDLQEV  
HLA-C06:02 DGYDPVQEN  
HLA-C07:01 IGEDPDPLN  
HLA-A01:01 LLDGDDNEDR  
HLA-C06:02 VAQDEEENA  
HLA-DRB107:0 SSRRFVRLAATTFI  
HLA-DRB107:0 PAYFVYCHIHRIPI  
HLA-DRB107:0 LDNRFFTLTVTSLI  
HLA-DRB107:0 VKLLFNETINVSVI  
HLA-DRB107:0 EIGLSATLQTRPSI  
HLA-DRB107:0 RPHRPLRVCPARI  
HLA-DRB107:0 SKHKIIHTGAKHYI  
HLA-DQA101:C LNHDELAQVQAC  
HLA-DRB107:0 EGIVPQYDGSNSF  
HLA-DRB115:0 KIYIVGGYNWRLT  
HLA-DRB107:0 RNRYTESISVAKIS  
HLA-DQA102:C SACPTSVSSAAAC  
HLA-DRB115:0 SILFAVMRFSLKT

HLA-DRB115:0 WGVKILHIDYIRY  
HLA-DRB115:0 AGSMRLYVGSLSH  
HLA-DRB107:0 SVWILKSAEGRVL  
HLA-DRB107:0 FQEMIQRLYGCLI  
HLA-DRB107:0 AQVIYSLLRSQDP  
HLA-DRB115:0 DMAMDTMIRIFF  
HLA-DRB107:0 ISVLSRTFANQRR  
HLA-DQA102:C RPILQFGLVAVSIY  
HLA-DQA102:C TYKASRAGVHAQ  
HLA-DQA102:C GTNAVIAYTVQSS  
HLA-DQA101:C NPDGNSLIQVGV  
HLA-DRB107:0 LWVVHVSGPINP  
HLA-DQA102:C KGKLAAVAQDEE  
HLA-DRB107:0 SRIALKSGHGKYL  
HLA-DRB115:0 QEVKILRSQLGEK  
HLA-DQA102:C TIIGPPAMQVEVL  
HLA-DRB107:0 PGLVKPSGTLSTL  
HLA-DRB107:0 HVYTFRSVSAEEP  
HLA-DRB107:0 PFFDLKPVSVDLA  
HLA-DRB107:0 SSFSTAKTSTSLHS  
HLA-DRB107:0 SLDGCYSTPSMFF  
HLA-DRB107:0 TLYKAKMWSLGE  
HLA-DRB107:0 VFTVSCGPSVPQF  
HLA-DQA102:C DELVGHSVAIGPF  
HLA-DQA102:C NSTDEEVASSLTL  
HLA-DQA101:C RSLNEHLQALLTP  
HLA-DRB107:0 KGKMDLLASNGC  
HLA-DRB115:0 ATHMCFCFGSYV  
HLA-DRB107:0 TSWPDLIAKFQI  
HLA-DRB107:0 PHKDRTLHRSRPF  
HLA-DQA101:C SVKEMLKSVMQE  
HLA-DQA101:C MDEGTYIHALDD  
HLA-DRB115:0 RSRRGYLAYRERC  
HLA-DRB115:0 DKDFLLSHWNDR  
HLA-DRB107:0 SDLYRHPRNHIGK  
HLA-DRB115:0 WEVPFVTWFFKC  
HLA-DRB107:0 CTMDSHMCSSH  
HLA-DRB107:0 GFKLKEVSSVNSP  
HLA-DRB115:0 CLPNHQHVYVGP  
HLA-DRB107:0 LQEVLELTKDLLST  
HLA-DQA102:C LGINSDELVGHSV  
HLA-DQA102:C PLNQSSSPSQMFI  
HLA-DRB115:0 ECELLRHPPAPHC  
HLA-DQA101:C SSDEKDSVLNIAR  
HLA-DQA102:C KEQQRRTSAQRRS  
HLA-DQA102:C SCGGSKGGCVSCQ  
HLA-DQA102:C GGADDSAEEGDL

HLA-DQA102:C CRPQCCQPVCCC  
HLA-DQA102:C RNEGSPSPRQSPI  
HLA-C07:01 FRLPNQCVL  
HLA-B08:01 VNRARIKSL  
HLA-B08:01 REKRRRQEL  
HLA-C07:01 WRLTNVTGI  
HLA-C07:01 RRYLREPLWL  
HLA-C07:01 SFSECSSLI  
HLA-C07:01 FRDECELLR  
HLA-C07:01 KRENEERLF  
HLA-B08:01 SLHSRTSST  
HLA-C07:01 HRHHVDVHL  
HLA-B08:01 EMIQRLYGCL  
HLA-C06:02 TSMPVSTTL  
HLA-B08:01 NPQQRLQMSA  
HLA-B08:01 LALLKKLSG  
HLA-B57:01 KAAALSTKI  
HLA-B57:01 YSWSPQQHFM  
HLA-C06:02 KRPGSRPQI  
HLA-B08:01 LPLTSLSSV  
HLA-C07:01 QSSDRDLFV  
HLA-C06:02 QRPQMSAVYV  
HLA-B57:01 KSTISPEKPTI  
HLA-B57:01 HPQPQPPLW  
HLA-B08:01 MPLTPQQAQEL  
HLA-B08:01 CLCQFKKSI  
HLA-B57:01 ISTEKLT  
HLA-C07:01 NRTTQQDNP  
HLA-C07:01 LTPPQAQEL  
HLA-C07:01 EQQEKQPEL  
HLA-B08:01 IPLTPQQAQAL  
HLA-C07:01 LSEGTTPLT  
HLA-C06:02 IAKVFQIDV  
HLA-B57:01 MGLLGLCEEVF  
HLA-C07:01 RSCAEKETT  
HLA-B08:01 NPKWNSNCE  
HLA-B08:01 LPVTSLSSA  
HLA-A01:01 VTDTSAST  
HLA-C07:01 SIATSTPSE  
HLA-C06:02 DGYDPVQEN  
HLA-C07:01 TTTTGTPTP  
HLA-A01:01 PTEKPTIPI  
HLA-C06:02 EAEGEAQEA  
HLA-B57:01 PTISPEKPTI  
HLA-DRB107:0 AAFTTAKAAALST  
HLA-DRB107:0 RARIKSLCALAAE  
HLA-DRB115:0 KIYIVGGYNWRLT

HLA-DQA102:C SACPTSVSSAAAC  
HLA-DQA101:C SMPVSTTLVASSE  
HLA-DRB107:0 LLMSYAFLLALLKI  
HLA-DRB107:0 FQEMIQRLYGCLI  
HLA-DQA101:C QQRLQMSAVYAI  
HLA-DRB115:0 LVPIMYSWSPLQ  
HLA-DRB107:0 KSFSECSSLIKHRR  
HLA-DQA102:C GTNAVIAYTVQSS  
HLA-DRB107:0 QATPLPLTSLSSV  
HLA-DQA101:C PQQAQALGILLTF  
HLA-DRB107:0 TTPLTSTPVSHTL  
HLA-DQA102:C TPAEGTSIATSTP  
HLA-DRB107:0 RYLREPLWLTHEV  
HLA-DRB107:0 SSFSTAKTSTSLHS  
HLA-DQA102:C QTLGIPLTPQQAC  
HLA-DQA102:C NSTDEEVASSLTL  
HLA-DQA102:C QQAQALGMPLTI  
HLA-DRB107:0 TSWPDLIAKVFQI  
HLA-DQA102:C PESEGVEAPEAEC  
HLA-DRB107:0 EVSKSTRSHRHH  
HLA-DRB115:0 MACCLCQFKKSIE  
HLA-DQA101:C TIPIEETTISTEKL  
HLA-DQA102:C GLCEEVFGTADLY  
HLA-DQA102:C STGDTTSLPVTDT  
HLA-DRB107:0 TPTEKPTISTEKL  
HLA-DRB115:0 ECELLRHPPAPHC  
HLA-DQA102:C CEFFIRDLEQEVL  
HLA-DQA102:C RENEERLFGSQEII  
HLA-DQA102:C SASTGDTTPLPVT  
HLA-DRB107:0 IGDYNRTVGKRPC  
HLA-DQA102:C TQSPTPTAITTTTI  
HLA-DQA101:C EEMIKIRSCAEKEI  
HLA-DQA102:C IPTEKSTISPEKPTI  
HLA-DQA102:C SWPTAASPPGGP  
HLA-DQA102:C PTISTEKLTIPTEKF  
HLA-DQA102:C LKYLEQQEGQLKI  
HLA-DQA102:C LQQEEEQLLGEEF  
HLA-DQA102:C TTQQDNPRTSCLA  
HLA-DQA102:C DQMPRNPNPQC  
HLA-A31:01 VVYPLDFVR  
HLA-A31:01 KSLPKKINAR  
HLA-C14:02 TYDEFRSFF  
HLA-C14:02 IFHGSILFL  
HLA-C07:01 SRKKRVIKV  
HLA-C14:02 TFHGAGLKRYL  
HLA-A31:01 RTPQLQAEPR  
HLA-C14:02 RAHCEGQEM

HLA-C14:02 YTIGVEAKV  
HLA-C14:02 KYKKTSLSTQV  
HLA-A31:01 QIMQQMSDHR  
HLA-DQA101:C YDEFRSFFQFLNN  
HLA-DRB115:0 SILFLYCVPSKNS  
HLA-DQA101:C IAIGSSESAQKALC  
HLA-DRB114:5 PLDIVITGKYKKT  
HLA-DRB114:5 MATFHGAGLKRY  
HLA-DRB114:5 VYPLDFVRTRLGV  
HLA-DQA101:C GLAQVPQVAPVR  
HLA-DRB114:5 SQKQVKSPLPKIN  
HLA-DQA101:C RDSYTIGVEAKVG  
HLA-DQA101:C KKRVIKVYSEDET  
HLA-DQA101:C EKKLEDARAHCEC  
HLA-B35:01 FAFNVKTSF  
HLA-B07:02 KPRLSFAHRAL  
HLA-A11:01 RMPFYGHEK  
HLA-A11:01 VVVSPSEFK  
HLA-C07:02 YRRCSDFHDF  
HLA-C07:02 VYMLSVKGL  
HLA-B07:02 HPGHTHSQA  
HLA-B07:02 QPHPGFTGEL  
HLA-B07:02 SPCSSLPI  
HLA-B07:02 QPPPQPQPPL  
HLA-B07:02 PPQSPHQSP  
HLA-B07:02 RALGCSSSV  
HLA-C07:02 LKESVSSIL  
HLA-A11:01 GLPDCLDK  
HLA-DRB111:0 DVYMLSVKGLAR  
HLA-DRB111:0 QHVFKVSLVSRM  
HLA-DRB111:0 KPRLSFAHRALIN  
HLA-DRB111:0 IAFAFNVKTSFMM  
HLA-DQA105:C TSSTASPPASSPC  
HLA-DRB111:0 LVVARSVGTFA  
HLA-DQA105:C SVSSILAGVNIVGT  
HLA-DRB111:0 FAKLIQTIWTSSPI  
HLA-DQA105:C AAPVKTALPAGP  
HLA-DRB111:0 SEEMWKTYRRCS  
HLA-DQA105:C HPGFTGELSKPAL  
HLA-DQA105:C PGHTHSQAGSRH  
HLA-DQA105:C HQSPLDSCSSPLL  
HLA-DQA105:C CIPGAWQCDGLP  
HLA-C03:03 LCLGHFHNL  
HLA-C03:03 VTYRETTLL  
HLA-C03:03 THVSGSLPL  
HLA-C03:03 YTCQTAAL  
HLA-B15:01 VQSQFNIY

HLA-B15:01 LIHDHTYY  
HLA-B15:01 AVVPLIKGVF  
HLA-B07:02 VPKSISVLPV  
HLA-C03:03 LILSHMQKL  
HLA-C07:02 YRKRKLDIIL  
HLA-B15:01 ASAEGPVADAF  
HLA-B15:01 EQKENFSGM  
HLA-A02:01 SLHYWDEDV  
HLA-A02:01 MLYDCMSDS  
HLA-A02:01 AMCEMEKKV  
HLA-B07:02 HPTRRSCSPT  
HLA-B15:01 GIKSGRMMF  
HLA-B07:02 APPGASLLLLL  
HLA-B07:02 CPDNGSCV  
HLA-A02:01 VSFEDDEIV  
HLA-C03:03 YVSTGHQPH  
HLA-C07:02 GRWKEEDSK  
HLA-C03:03 AAAQEGEDE  
HLA-DRB101:0 CQTAALQQVLSTI  
HLA-DRB101:0 EEVFNTAVVPLIKV  
HLA-DRB101:0 LGHFHNLHVFQQ  
HLA-DRB101:0 FVIIRREKLILSHM  
HLA-DRB101:0 VPKSISVLPVNPH  
HLA-DRB101:0 FWVVADEALSKY  
HLA-DRB101:0 QHLHTHVSGSLPI  
HLA-DQA101:C AAPPGASLLLLLQ  
HLA-DQA101:C YQVSCMLCAESM  
HLA-DRB101:0 SYRELARVQSQFM  
HLA-DRB101:0 PSSFSTLIHDHTYY  
HLA-DQA101:C SPGSLHYWDEDV  
HLA-DRB113:0 EDEDEIVRINPRD  
HLA-DRB101:0 DLVTYRETTLLIDF  
HLA-DRB101:0 ARRAEGIKSGRM  
HLA-DQA101:C EEAKSVAMCEME  
HLA-DQA101:C QQQGLSNASAEC  
HLA-DRB101:0 KENFSGMNGDLE  
HLA-DRB101:0 AQNYRKRKLDIILI  
HLA-DRB101:0 QRSLDEIHPTRRS  
HLA-DRB101:0 PATQRQDPAAAC  
HLA-DRB113:0 DNGSCVPDGPGL  
HLA-DQA101:C EDRQGRWKEEDS  
HLA-A02:01 ILHENLLL  
HLA-C03:03 SAISTLSATPV  
HLA-B15:01 GQPDRQGQSY  
HLA-C03:03 KAFSQSSTL  
HLA-C03:03 VTYRETTLL  
HLA-C03:03 SVVKPSFLPL

HLA-C03:03 FQHSNCAL  
HLA-C03:03 KAFRQSANL  
HLA-A02:01 GLVENLLVICI  
HLA-C03:03 AANVRSTL  
HLA-C03:03 TAAPPTPPA  
HLA-B15:01 KIIHTGEKPY  
HLA-B07:02 TPSEQLTPL  
HLA-B07:02 SPSKSGSEA  
HLA-B15:01 KLVCTSPEY  
HLA-C03:03 KSFTCSSL  
HLA-B07:02 SPEKLTPT  
HLA-C03:03 KAFYKRYRL  
HLA-B15:01 LQISTSTDRPV  
HLA-B15:01 KLHTGEKPY  
HLA-B07:02 DPSCPRLSREL  
HLA-B07:02 SPEKLTPT  
HLA-A02:01 SLHYWDEDV  
HLA-B15:01 KIHTGEKPY  
HLA-A02:01 AMCEMEKKV  
HLA-C07:02 FRETGNF  
HLA-B15:01 VTLPVFKHY  
HLA-B15:01 RIHTGEKLY  
HLA-B07:02 KPHGCSLCGKA  
HLA-B07:02 CPDNGSCV  
HLA-B15:01 YKCEESKAY  
HLA-C03:03 YVSTGHQPH  
HLA-B07:02 RPYKCEECGKA  
HLA-B15:01 YKCECDKAY  
HLA-B15:01 TQKDSTSKSG  
HLA-C07:02 IHTGEKPYK  
HLA-B15:01 YKCEECKAF  
HLA-C03:03 SEIEDENQI  
HLA-C03:03 KPYKCEECG  
HLA-B07:02 KCEECGKAFNQ  
HLA-DRB101:0 LPLPFDIMKGLTLI  
HLA-DRB101:0 FNQFSNLTHKIIH  
HLA-DRB101:0 CALSTPYIHSLAPI  
HLA-DRB101:0 SSAISTLSATPVDT  
HLA-DRB101:0 GKAFRQSANLYVI  
HLA-DRB101:0 GKAFSQSSTLTTH  
HLA-DRB101:0 AEDLRILHENLLL  
HLA-DRB101:0 KLKLVCTVPLSGSI  
HLA-DRB101:0 MFVVGLVENLLV  
HLA-DRB101:0 FYKRYRLTEHERA  
HLA-DRB101:0 FWVVADEALSKY  
HLA-DQA101:0 GNNFSDVAIQIRC  
HLA-DRB101:0 GKAFNQSSTLTRH



HLA-DRB101:0 CGKSFTCSSSLIKH  
HLA-DRB101:0 ERQLTPLPPSADC  
HLA-DRB101:0 KKDENVAGVTLPV  
HLA-DRB101:0 SKAYRWFSDLAKI  
HLA-DRB101:0 EECGKAFNQSSTL  
HLA-DQA101:C SPGSLHYWDEDV  
HLA-DRB101:0 EECCKAFNKFSNL  
HLA-DRB101:0 ECGKAFNRSSNLI  
HLA-DRB101:0 DLVTYRETTLLIDF  
HLA-DQA101:C EEAKSVAMCEME  
HLA-DQA101:C SCPRLSRELLEVV/  
HLA-DRB113:0 ELQISTSTDRPVTI  
HLA-DQA101:C EKGTAADAANVRS  
HLA-DRB101:0 KWSSTLSYHKKIH  
HLA-DRB113:0 ILTKHKIIHTGEKP'  
HLA-DRB113:0 TIISTEKPTISPEKL  
HLA-DRB113:0 ENQILENSSQKEN  
HLA-DRB101:0 PTPPATTPAPPSS  
HLA-DQA101:C KDSTSKSGSEAQT  
HLA-DQA101:C KCEECGKAFNCSS  
HLA-DRB113:0 DNGSCVPDGPGL  
HLA-DQA101:C EKPYKCEECGKAF  
HLA-DRB113:0 HKRIHTGKKPHG(  
HLA-DQA101:C PDRQGQSYHYGC  
HLA-DQA101:C TEKPTISPEKLTPP  
HLA-C03:03 FGVYVGTAI  
HLA-B07:02 RPKDAATPL  
HLA-C03:03 YRIDANQDL  
HLA-A02:01 YLAYQNNQV  
HLA-C03:03 KAFPYSSYL  
HLA-B15:01 YLMGTELF  
HLA-C03:03 KAMSVTKPI  
HLA-B15:01 ALREGTRVQSM  
HLA-B15:01 AQALEELFPHY  
HLA-B07:02 VVRSPHGVL  
HLA-B15:01 VQYGHTQM  
HLA-B07:02 LPGHLKLTTL  
HLA-B07:02 TP SERQLTPL  
HLA-A02:01 KLSDFLTLEGI  
HLA-C03:03 FALSTGDAS  
HLA-A02:01 NIFVDVILV  
HLA-A02:01 GLIGVQQPPQI  
HLA-B07:02 SPPVPSWNE  
HLA-B07:02 EPRRETTWSI  
HLA-C03:03 VISHVGDVL  
HLA-C07:02 SFKDNLKDF  
HLA-A02:01 LLDPYGGHRNV

HLA-B07:02 EPPGPRGDL  
HLA-A02:01 WLMLISMANDL  
HLA-A02:01 CLLNNVDLA  
HLA-A02:01 TLLEDKDVSVI  
HLA-A02:01 SLHYWDEDV  
HLA-A02:01 AMCEMEKKV  
HLA-C03:03 HSTGDNLLL  
HLA-C07:02 RRKSGHPVH  
HLA-C03:03 TSSTHHAEV  
HLA-C07:02 LREEREKRR  
HLA-A02:01 YMQRKCQECRL  
HLA-B07:02 CPDNGSCV  
HLA-B07:02 KPNNSNAH  
HLA-C03:03 YVSTGHQPH  
HLA-C03:03 TATTSESST  
HLA-DRB101:0 LSDFLTLEGINSKII  
HLA-DRB101:0 DLLAIGLTNMLGS  
HLA-DRB101:0 RCVWLMLISMAF  
HLA-DRB101:0 VVRYLAYQNNQV  
HLA-DRB101:0 MPGLKGLKGLPG  
HLA-DRB101:0 IAQLKDLLPGHLK  
HLA-DRB101:0 IRCFGVYVGTAILA  
HLA-DRB101:0 PENLYLMGTELFE  
HLA-DRB101:0 HRGVTVVRSPHG  
HLA-DRB101:0 ASQPVRLFRGRTS  
HLA-DRB101:0 QGFQGLIGVQQP  
HLA-DRB101:0 LFPHYTSLRPGPP  
HLA-DRB113:0 SVTKPITVTKSVPA  
HLA-DRB101:0 FWVVADEALSKY  
HLA-DRB113:0 FVDVILVDPNHW  
HLA-DRB101:0 SLYQALREGTRVC  
HLA-DQA101:C RRETTWSIGLQVW  
HLA-DRB101:0 ERQLTPLPPSADC  
HLA-DQA101:C SPGSLHYWDEDV  
HLA-DQA101:C YGGHRNVAYIVVW  
HLA-DRB101:0 EEPYTPSPPVPSW  
HLA-DRB101:0 AFPFYSSYLRRHER  
HLA-DRB113:0 RTKCLLNNVDLAF  
HLA-DQA101:C KNGGNCVMDMVA  
HLA-DQA101:C RKGDGELVELVC  
HLA-DRB113:0 SRTLLEDKDVSVIW  
HLA-DRB101:0 DNLKDFLLVIPFDI  
HLA-DQA101:C GGVSTGVISHVGI  
HLA-DQA101:C EEAKSVAMCEME  
HLA-DQA101:C SSTSSGASTATTW  
HLA-DRB101:0 TSTSLHSHTSSTHI  
HLA-DQA101:C FENTENATITDQF

HLA-DRB101:0 LEHLQQRRKSG  
HLA-DQA101:C HRPKDAATPLRST  
HLA-DRB101:0 SEGEQQLKPNNS  
HLA-DRB113:0 DNGSCVPDGPGL  
HLA-DRB113:0 EEQLLREEREKRR  
HLA-B07:02 RPRVAKTWM  
HLA-C03:03 YASNLSKDPVL  
HLA-B07:02 RPKDAATPL  
HLA-A02:01 YLAYQNNQV  
HLA-C03:03 AAAVATPWM  
HLA-B15:01 VQMCKMKVF  
HLA-C03:03 LDYPRIVKL  
HLA-B07:02 VVRSPHGVL  
HLA-B07:02 LPGHLKLTTL  
HLA-A02:01 KLSDFLTLEGI  
HLA-C03:03 FALSTGDAS  
HLA-B15:01 KQQLSHIY  
HLA-A02:01 GLIGVQQPPQI  
HLA-B07:02 SPPVPSWNE  
HLA-B07:02 EPRRETTWSI  
HLA-C03:03 VISHVGDVL  
HLA-C07:02 SFKDNLKDF  
HLA-A02:01 LLDPYGGHRNV  
HLA-B07:02 EPPGPRGDL  
HLA-B07:02 RPEPPDTGV  
HLA-B07:02 SPKGSPAT  
HLA-B07:02 APTTTKKPA  
HLA-B15:01 YQGAQGPPG  
HLA-A02:01 TLLEDKDVSVI  
HLA-A02:01 SLHYWDEDV  
HLA-B07:02 SPEKLTIST  
HLA-B15:01 RVNKEQDHF  
HLA-A02:01 AMCEMEKKV  
HLA-C03:03 HSTGDNLLL  
HLA-C07:02 EREKRRRQE  
HLA-C07:02 IYLNTGDL  
HLA-A02:01 YMQRKCQECL  
HLA-B07:02 CPDNGSCV  
HLA-B07:02 KPNNSNAH  
HLA-C03:03 YVSTGHQPH  
HLA-C07:02 GRDFNSTKN  
HLA-DRB101:0 LSDFLTLEGINSKII  
HLA-DRB101:0 NNAYAVAVANYA  
HLA-DRB101:0 VVRYLAYQNNQV  
HLA-DRB101:0 MPGLKGLKGLPG  
HLA-DRB101:0 IAQLKDLLPGHLK  
HLA-DRB101:0 VAKTWMFLLLLG

HLA-DRB101:0 HRGVTVVRSPHG  
HLA-DRB101:0 ASQPVRLFRGRTS  
HLA-DRB101:0 SDTYVTLRVNKEC  
HLA-DRB101:0 KGDIYLN TGDLIV  
HLA-DRB101:0 QGFQGLIGVQQP  
HLA-DRB101:0 LLRVLVQMCKMK  
HLA-DRB101:0 VATPWMRAGAL  
HLA-DRB101:0 FWVVADEALSKY  
HLA-DQA101:C RRETTWSIGLQV  
HLA-DRB101:0 YPRIVKLYDYFSLC  
HLA-DQA101:C SPGSLHYWDEDV  
HLA-DRB101:0 FVEYNKQQLSHIY  
HLA-DQA101:C YGGHRNVAYIVV  
HLA-DRB101:0 EKGYQGAQGPPC  
HLA-DRB101:0 EEPYTPSPPVPSW  
HLA-DRB101:0 GRDFNSTKNVKN  
HLA-DRB101:0 KTRMYSLRPEPPC  
HLA-DQA101:C KNGGNCVMDM  
HLA-DRB113:0 SRTLLEDKDVSVI  
HLA-DRB101:0 DNLKDFLLVIPFD  
HLA-DQA101:C GGVSTGVISHVGI  
HLA-DQA101:C EEAKSVAMCEME  
HLA-DQA101:C FENTENATITDQ  
HLA-DQA101:C HRPKDAATPLRS  
HLA-DRB113:0 PEKLTISTEKPTIP  
HLA-DRB101:0 APTTTKKPAP TTP  
HLA-DRB101:0 SEGEQQLKPNNS  
HLA-DRB113:0 DNGSCVPDGPGL  
HLA-DQA101:C LQQEEEQLLGEEF  
HLA-DRB101:0 APTTPAATPPSPK  
HLA-A02:01 ALFSGSLEPV  
HLA-A02:01 RLTRFLPKV  
HLA-A02:01 SLLNMICQQV  
HLA-A02:01 SLHSFSVEV  
HLA-A02:01 YLHVCPQPL  
HLA-A02:01 GILCLPLFHLV  
HLA-C06:02 SRTNCVNIF  
HLA-A02:01 ALEWQLPPL  
HLA-A02:01 SQLEDELEV  
HLA-C06:02 YRRMSGVRPL  
HLA-A02:01 SVLSHSNLV  
HLA-A02:01 SLYASGGFAM  
HLA-A02:01 LLVNKMLLEA  
HLA-A02:01 RLSHSPEHV  
HLA-A02:01 FLGSANFGEAV  
HLA-C06:02 SRPADRL  
HLA-C06:02 TSRGYTPYV

HLA-A02:01 YLRHCQEYKL  
HLA-A02:01 HLAPKCRTPEL  
HLA-A02:01 KMISTQQLMM  
HLA-A02:01 GLREAQAFLRV  
HLA-A02:01 GLTSPDPYI  
HLA-A02:01 TSFHDILWHFV  
HLA-C06:02 FRIPLKNV  
HLA-A02:01 RLLEWQCGG  
HLA-A02:01 HLQPSLEEGFI  
HLA-C06:02 YRTYSKKHFWI  
HLA-A02:01 TLITITNNM  
HLA-A02:01 GMESMSQDTEV  
HLA-C06:02 QRRETHSA  
HLA-C06:02 MTMTRPTTC  
HLA-C06:02 ERKICGLTL  
HLA-C06:02 SRYRNNIKN  
HLA-C06:02 YSDSDLSS  
HLA-C06:02 NSSEQGVSL  
HLA-C06:02 PRRERRQAN  
HLA-A02:01 CMNDKDVSGKM  
HLA-C06:02 HSRDFQILY  
HLA-C06:02 VRQCILNRI  
HLA-C06:02 QRTRVAPFL  
HLA-C06:02 HSNSHNEFW  
HLA-A02:01 IQILPKYSA  
HLA-A02:01 GLGQGLKDI  
HLA-A02:01 CQLEEEHYYN  
HLA-C06:02 FTDKWEDHP  
HLA-C06:02 TSEEPDECE  
HLA-C06:02 CSSNPKPSN  
HLA-C06:02 NCYGNSCGY  
HLA-DRB113:0 ALSLIHSRTNCVN  
HLA-DRB113:0 SGSVLSHSNLVIKI  
HLA-DRB113:0 ILSGSVLSHSNLVI  
HLA-DRB113:0 LSGSVLSHSNLVIK  
HLA-DRB114:5 LVLSVKGLPRLTRI  
HLA-DRB114:5 LKDIKRTCNRFLI  
HLA-DRB113:0 TLITITNNMGSIAF  
HLA-DRB114:5 VRQCILNRIKANV  
HLA-DRB114:5 DSGLREAQAFLRV  
HLA-DQA101:C QWFGYHIAWEVI  
HLA-DQA101:C TSFHDILWHFVAS  
HLA-DQA101:C SLYASGGFAMIQI  
HLA-DRB113:0 SRDFQILYRNEEV  
HLA-DRB113:0 RDFQILYRNEEVP  
HLA-DRB113:0 DFQILYRNEEVPII  
HLA-DRB114:5 MAKYRRMSGVRI

HLA-DQA101:C NKALEWQLPPLQ  
HLA-DRB114:5 WEHLKKVASRYR  
HLA-DRB114:5 ECEKFRKAFSHLT  
HLA-DRB114:5 LSQEQIQILPKYSA  
HLA-DRB114:5 RKKMISTQQLMM  
HLA-DRB113:0 HCQEYKLDPVNA  
HLA-DQA101:C YSKKHFVWIFREEN  
HLA-DQA101:C EHYYNEMFGVW  
HLA-DQA101:C LPLFHLVLSLPC  
HLA-DQA101:C ESLHSFSVEVPVSI  
HLA-DQA101:C RKICGLTLVSAPHI  
HLA-DRB114:5 PDPYIIVGSHHHT  
HLA-DQA101:C EFSTALFSGSLEPV  
HLA-DQA101:C QNSLLNMICQQV  
HLA-DQA101:C GSANFGEAVHFV  
HLA-DQA101:C SHNEFWCALVEK  
HLA-DRB114:5 IYTWARGRVVSSI  
HLA-DRB114:5 TERYLHVCPQPLA  
HLA-DRB114:5 GKAFSVSGSLQRF  
HLA-DQA101:C EQGVSLDIDLWD  
HLA-DRB114:5 KTDYMTMTRPTT  
HLA-DQA101:C SSHWKCARLLEW  
HLA-DRB113:0 MRLRLSHSPEHVI  
HLA-DQA101:C RGYTPYVSHVGLC  
HLA-DQA101:C PFLEKQGFKQQA  
HLA-DRB113:0 LEDELEVGNVPLK  
HLA-DQA101:C PLNAAPYGMESN  
HLA-DQA101:C QPSLEEGFIDTHC  
HLA-DRB114:5 TTPGFRIPLKNVH  
HLA-DRB114:5 PLNLAHQQSRPA  
HLA-DRB114:5 SDPFTHLAPKCR  
HLA-DRB113:0 VDDGFCSSNPKP  
HLA-DRB114:5 WIYMNRTFTDKV  
HLA-DQA101:C SSNSTDLPLNIEC  
HLA-DRB114:5 PRRERRQANLLK  
HLA-DQA101:C MCCNCYGNSCG  
HLA-B35:01 LPTRLTQTF  
HLA-B35:01 YLIGCGNAY  
HLA-B35:01 LATDLLFLM  
HLA-B35:01 FLAFNERLY  
HLA-C08:02 FKDAWLLHL  
HLA-A24:02 TYAIYVRF  
HLA-B35:01 MALSASNSCF  
HLA-C08:02 NFDLKNNSL  
HLA-B35:01 SPLVVQYVL  
HLA-A26:01 EVLSSMSWI  
HLA-A26:01 ETIGEILNKI

HLA-A26:01 ETAGGVLTA  
HLA-B35:01 RPLCLSKSIRF  
HLA-B35:01 LPAETMRM  
HLA-B35:01 FISTQKQVTF  
HLA-B35:01 EAIRVPPTL  
HLA-C08:02 ITSSNAAKL  
HLA-B14:02 LLGLRDLVL  
HLA-B35:01 WGTTSSTPRVNY  
HLA-C08:02 LGQPAQKCL  
HLA-B35:01 FARVEPAL  
HLA-B14:02 NQLERVPP  
HLA-C08:02 VNIKAGKAL  
HLA-B35:01 RPLLAATTTKL  
HLA-C08:02 ITQLEKLL  
HLA-C08:02 RVTNVPCAS  
HLA-B35:01 EAPPALET  
HLA-C08:02 QGGGGQAPT  
HLA-B35:01 VPLPPARPR  
HLA-DRB101:0 PPLIRGLRGLTRLF  
HLA-DRB101:0 TDLLFLMPSLTSG  
HLA-DRB101:0 NRFVAITSSNAAK  
HLA-DRB101:0 AVNIKAGKALLRL  
HLA-DRB101:0 DDEYLALPTRLTQ  
HLA-DRB101:0 SRPLLAATTTKLS  
HLA-DRB101:0 ARCFARVEPALKS  
HLA-DRB101:0 LRDLVLLKVKLGD  
HLA-DRB101:0 TEVLEKLRPLCLSK  
HLA-DRB101:0 KQVTFLLKIKRTRF  
HLA-DRB101:0 VVQYVLRPTSTVC  
HLA-DRB101:0 ISKAIHLPAETMRI  
HLA-DRB101:0 NERLYGPLQAYLF  
HLA-DRB101:0 YDIFYTAAKPGTY  
HLA-DRB101:0 KEHITQLEKLLLL  
HLA-DRB101:0 KCLLQVVMRVSV  
HLA-DRB101:0 SLGLETAGGVLTA  
HLA-DRB101:0 AWLLHLHSGPW  
HLA-DRB101:0 GEILNKIIPTEEYC  
HLA-DRB101:0 WEPVFQNGKMA  
HLA-DRB101:0 VGHYTVVWYS  
HLA-DRB101:0 ETLHVVRGEHSI  
HLA-DRB101:0 LKQEVLSMSWIS  
HLA-DRB101:0 PLRGTANLSEAIR  
HLA-DRB101:0 EERNFDLKNNSLE  
HLA-DRB101:0 RVNYPKTLQCAN  
HLA-DRB101:0 EVKEAYMGNVLC  
HLA-DQA103:0 NVPCASPGSVAG  
HLA-DRB101:0 ASDPVPLPPARPF

HLA-C12:03 QAYPLLSVI  
HLA-C12:03 FIRDVLQHV  
HLA-B39:01 SPDPMTMAL  
HLA-B40:02 KEMNSELSL  
HLA-C12:03 IQESPGKVV  
HLA-C12:03 NLLPSSRTL  
HLA-C12:03 VARKMLLASTF  
HLA-B39:01 YRLTTDPYRM  
HLA-B40:02 AEQQRLAAG  
HLA-B40:02 SEGKHKHSH  
HLA-DRB113:0 FHVFIIRDVLQHVI  
HLA-DQA101:C PDPMTMALSVLV  
HLA-DQA101:C GSPSLQAYPLLSV  
HLA-DQA101:C VARKMLLASTFSC  
HLA-DRB113:0 SPTLNLLPSSRTL  
HLA-DRB113:0 YQRIRIQESPGKV  
HLA-DRB116:0 TDPYRMSPPYR  
HLA-DQA101:C CCGRAEQQLAA  
HLA-DQA101:C AEKEMNSELSL  
HLA-DRB116:0 KHKHSHSKGSSRE  
HLA-A02:02 FLGNSAPVSL  
HLA-A02:02 LLIEEPAFNV  
HLA-A02:02 RLFRENSSLV  
HLA-A02:02 FIFAVVDMQL  
HLA-A02:02 QLAEVELRL  
HLA-A02:02 LLLPLPQSFL  
HLA-A02:02 IMWDYKDPL  
HLA-A02:02 SLIPLMVNGI  
HLA-A02:02 WLCGPDEEGV  
HLA-A02:02 RMVQLESIDQV  
HLA-A02:02 SLEMPDDFGV  
HLA-A02:02 TLPRDIFQPL  
HLA-A02:02 FQLFFADGIL  
HLA-B44:03 DECDKVFNW  
HLA-C03:04 KAFSRSTL  
HLA-A02:02 GTSYDSYWL  
HLA-A02:02 QLKAAVGEL  
HLA-B44:03 TELQENGCW  
HLA-A02:02 KMPPLQAFT  
HLA-A02:02 KLIDRVYKG  
HLA-A02:02 SIPSPIAPL  
HLA-C03:04 FVNGQPRPF  
HLA-A02:02 NLIQQLIRA  
HLA-A02:02 FYALEEQHV  
HLA-C03:04 KAFNQSSNL  
HLA-A02:02 TLERNPMSV  
HLA-A02:02 KTFSKVSTL



HLA-A29:02 IIHTGEKPY  
HLA-A29:02 KVIHTGEKPY  
HLA-A02:02 TQJSPKSWG  
HLA-A02:02 PLTPHPSGI  
HLA-A02:02 VMFKSDRQAA  
HLA-A02:02 RLDLNHKEV  
HLA-C03:04 FGSASHLQI  
HLA-A02:02 AMYYETFVW  
HLA-A29:02 IIHTGKKPY  
HLA-A02:02 ILTEHKIIHT  
HLA-B44:03 HEKIHTDAF  
HLA-A02:02 NLRQQNDTA  
HLA-A02:02 SLTSHSQI  
HLA-B44:03 CEECGKAF  
HLA-A02:02 GLAVDNLF  
HLA-C03:04 SAASSGNNSSA  
HLA-B44:03 AEGQAEAE  
HLA-C03:04 YGQEGSGGAV  
HLA-A02:02 TIATRFDR  
HLA-A02:02 TLTEHKRIHNG  
HLA-B44:03 AEAKTQKGS  
HLA-A02:02 CKPQCCQSV  
HLA-C03:04 KTPPKRERKPL  
HLA-B15:10 SQRSHRSPS  
HLA-DRB111:0 AGFFIRRRMYPPL  
HLA-DRB111:0 FSRFSYLTAHKIIH  
HLA-DRB111:0 NIKNLIQQLIRATY  
HLA-DRB111:0 GQLLIRLDLNHKE  
HLA-DRB111:0 QTWLLNRYRMV  
HLA-DRB111:0 EKAFVRKSHLVQ  
HLA-DRB111:0 FESSQVKYLRRELI  
HLA-DQA105:C YGQEGSGGAVST  
HLA-DQA105:C SRSTSTGSAASSG  
HLA-DQA105:C GISFLGNSAPVSLI  
HLA-DRB111:0 VDNLFHRPRATVI  
HLA-DRB111:0 FSTFSILTEHKIIHT  
HLA-DRB111:0 FSKVSTLTTHKAIF  
HLA-DRB111:0 PFDIMKGLTLERN  
HLA-DQA105:C RTHSNFILANAQV  
HLA-DRB111:0 LQEIQELTQLKA  
HLA-DRB111:0 GKAFSRSTLAKH  
HLA-DRB111:0 WEKYKSSRKLIDR  
HLA-DRB111:0 KHEIIHTGKKPYK  
HLA-DRB111:0 DYKDPLVNLINKY  
HLA-DQA105:C TQJSPKSWG  
HLA-DRB111:0 MELLPLPQSFLLI  
HLA-DQA105:C FCFGPGNVVSQS

HLA-DQA105:C KQCGKAFGSASH  
HLA-DRB111:0 LFRENSTLVRHQF  
HLA-DRB111:0 VVDMQLFGKSYK  
HLA-DRB111:0 ETVMFKSDRQAA  
HLA-DRB111:0 KSSTLTYHKVIHTC  
HLA-DRB111:0 MPDDFGVYSYLF  
HLA-DQA105:C LEEFQLFFADGILM  
HLA-DRB111:0 PTDFCRKHKMPL  
HLA-DRB111:0 EECGKAFNQSSTL  
HLA-DRB111:0 DKVFNWWSQLT  
HLA-DQA105:C PEFAMYYETFVW  
HLA-DQA105:C QPYGSSFYALEEC  
HLA-DQA105:C VLLPGASVQLPM  
HLA-DRB111:0 AFKWSSTLTEHKF  
HLA-DQA105:C SPNRSGAEAKTQ  
HLA-DQA105:C IQPPGIPPLGGSA  
HLA-DQA105:C MESIPSPIAPLPTF  
HLA-DRB111:0 NQSSNLTNHKKIF  
HLA-DRB111:0 NNNLQTLPRDIFC  
HLA-DQA105:C TSYDSYWLCDSL  
HLA-DQA105:C ERKPLGGSSRGN  
HLA-DQA105:C PRGEAEGQAEAE  
HLA-DRB111:0 QLAEVELRLKDCL  
HLA-DQA105:C DPDADRLAATELC  
HLA-DQA105:C DTASKIIDSQQDE  
HLA-DQA105:C SQRSHRSPERSH  
HLA-DRB111:0 PSCCVSSCCKPQC  
HLA-A02:02 FMFFICLFTV  
HLA-A02:02 FLIGNSTTL  
HLA-A02:02 LLIEEPAFNV  
HLA-A02:02 FFSVYLTAL  
HLA-A02:02 LMMAKAAVV  
HLA-A02:02 KMFSQEKWHV  
HLA-A02:02 YVCTYQFSV  
HLA-A29:02 CVFSFLDPLAY  
HLA-A02:02 SLYEATIKNL  
HLA-A02:02 LLYECTISPS  
HLA-A02:02 VLNSAAGYKV  
HLA-A29:02 AFRQDFWKY  
HLA-A02:02 TLPRDIFQPL  
HLA-A02:02 GLSQSWSERI  
HLA-A29:02 ALTPPPFPSSY  
HLA-A02:02 LIINETGASI  
HLA-C03:04 FVNGQPRPF  
HLA-A02:02 KLDECQEYG  
HLA-A02:02 VVAACCF SRL  
HLA-B44:03 SEDPFREKKF

HLA-A29:02 YQPPLQGQFY  
HLA-A02:02 VVCAELGLV  
HLA-A02:02 KVSPNEEDL  
HLA-A02:02 YITFDAGHI  
HLA-B44:03 EENTKILGKI  
HLA-C03:04 RAAAKRTSTKM  
HLA-A02:02 TQNPPGSPPNV  
HLA-C03:04 FGEQDGGEL  
HLA-B44:03 ADSPSQHW  
HLA-B44:03 IETPEARNRGF  
HLA-B44:03 GENCARWSS  
HLA-B44:03 SEATTRTPGA  
HLA-A29:02 HQRVHTEKKHY  
HLA-A02:02 CKPQCCQSV  
HLA-B15:10 QRHPDTLSF  
HLA-A02:02 RIAERKSKEPQ  
HLA-B44:03 EEDDDEEKDDL  
HLA-A02:02 RCCRPQCCQSV  
HLA-DRB111:0 ACCFSRLLRRHRL  
HLA-DRB111:0 AGFFIRRRMYPPL  
HLA-DRB111:0 KRMVVYQTAFRC  
HLA-DQA105:C SVLFRAAGLAGSE  
HLA-DRB111:0 FESSQVKYLRRELI  
HLA-DRB111:0 GISIMIKKPQKSKF  
HLA-DQA105:C ECHLMMAKAAV  
HLA-DRB111:0 GYKVKCAYKKYLY  
HLA-DRB110:0 SVYLTALLGNAAIL  
HLA-DRB111:0 QRRLKMFSQEKV  
HLA-DRB111:0 YEATIKNLVKGIQI  
HLA-DRB111:0 NTKILGKINQFFV  
HLA-DRB111:0 YNNIFNFRSNGLS  
HLA-DQA105:C ATTRTPGASPPAF  
HLA-DRB110:0 VGGFFLIGNSTTL  
HLA-DRB111:0 FMFFICLFTVIVPC  
HLA-DRB111:0 LNCYITFDAGHKL  
HLA-DQA105:C HWVMPPGPASV  
HLA-DRB111:0 SKYASFSNHQRVI  
HLA-DRB111:0 QGQFYAFSNFYF  
HLA-DRB111:0 SPPNVLWQTPLA  
HLA-DRB111:0 PLMAQGAPWRT  
HLA-DQA105:C LLIINETGASIDDFI  
HLA-DRB111:0 NNNLQTLPRDIFC  
HLA-DRB111:0 EARNRGFLKGLFC  
HLA-DRB111:0 LIEQRIAERKSKEP  
HLA-DQA105:C VAVCAELGLVLSC  
HLA-DRB111:0 DTLSFRCSLADFQ  
HLA-DRB110:0 KLLYECTISPSSPL

HLA-DRB111:0 RWSSDKAHKVLK  
HLA-DRB111:0 SEDPFREKKFFCA  
HLA-DQA105:C ATSTTASPLRDGF  
HLA-DQA105:C TREGALTPPPFPS  
HLA-DRB111:0 CCISSCCRPSCCVS  
HLA-DQA105:C VTTLTADPPDGIK  
HLA-DQA105:C TTYCRPSCCVSSC  
HLA-DQA105:C KDDLEVKEENGVI  
HLA-A11:01 SSNLVLLYK  
HLA-A02:01 FQNNQLISFEV  
HLA-C07:01 TDFGHSEIL  
HLA-B08:01 YPWRRCCCL  
HLA-A11:01 ASNMPGGFICR  
HLA-A02:01 FSCCKLTGV  
HLA-B44:27 FEVPGNQMTI  
HLA-A02:01 ALTHFLPQGT  
HLA-DRB107:0 NNQLISFEVIATLII  
HLA-DRB107:0 RVTIRLSSNLVLLY  
HLA-DRB103:0 HSEILGETSLMRT  
HLA-DRB107:0 MGFRSKIKNALT  
HLA-DQA105:C CLNGGTCAVASN  
HLA-DRB107:0 KISFKEQVPIPLEE  
HLA-DRB107:0 GNQMTILKTTSEE  
HLA-DRB107:0 QFSCCKLTGVTGC  
HLA-A68:01 TTVMISVIHER  
HLA-A68:01 QIYDLVDRHFR  
HLA-A68:01 MSSFLNKEDR  
HLA-A68:01 FIASSALSR  
HLA-A68:01 ETHRRKARR  
HLA-A68:01 HIIINSMHK  
HLA-B08:01 MLLAWSLAL  
HLA-B08:01 AMMEHFVQL  
HLA-A68:01 TSEDLENFK  
HLA-A68:01 LVFEELTSK  
HLA-A68:01 EAEQITLK  
HLA-A68:01 EILGVQNLLQK  
HLA-B41:01 LEQFVSIPM  
HLA-B41:01 RERDKLHAV  
HLA-A68:01 RASSPSTTR  
HLA-B41:01 IEAITHGAL  
HLA-B41:01 VEISAITHGAL  
HLA-B41:01 AEKTEDVEI  
HLA-B41:01 PEMNYKGQYEI  
HLA-C07:02 LRPEPPDTG  
HLA-C07:02 MKCQGQHWY  
HLA-DRB107:0 GKAFIASSALSRHI  
HLA-DRB107:0 KLEQFVSIPMASII

HLA-DRB107:0 MEHFVQLTSRQC  
HLA-DQA105:C LLAWSLALVASLG  
HLA-DRB107:0 SEDLENFKALRVIA  
HLA-DRB107:0 FKSYLKSKYQMSSF  
HLA-DQA105:C SAITHGALQGLAY  
HLA-DRB107:0 ALSCFVLTVMIS'  
HLA-DRB103:0 ANQIYDLVDRHFI  
HLA-DRB103:0 ALRISKEVIRKRER  
HLA-DRB107:0 HLDPFGHHIINSMI  
HLA-DQA102:C RNKSQDSGIAEM  
HLA-DQA105:C PPPSLPTIGAETHI  
HLA-DQA105:C REPTRASSPSTTRI  
HLA-DQA105:C AKQTSEILGVQNL  
HLA-DQA105:C YKGQYEITAEDSC  
HLA-DRB103:0 DLQHRLEAEQIT  
HLA-DQA105:C PEPDGTGVSHLCF  
HLA-DQA105:C RRPAAKTEDVEITI  
HLA-DRB107:0 CQGQHWYSSSDI  
HLA-A02:01 SLFFYVWYV  
HLA-C12:03 FSDENKNVV  
HLA-A02:01 MLSHPLPGV  
HLA-C12:03 IAMIIIVVMV  
HLA-C12:03 YKCEVVNKV  
HLA-A02:01 FLIQQQYSQV  
HLA-C12:03 FSLALALVSSL  
HLA-A02:01 SLAPPPAEV  
HLA-C12:03 YSLDVCHQIPL  
HLA-C12:03 ASYLALTAV  
HLA-C12:03 ITRDNINTHSL  
HLA-C12:03 RSFRVGEAV  
HLA-C12:03 TLGEPVETI  
HLA-C12:03 SAHSINYSM  
HLA-C12:03 EARLVVLVI  
HLA-C06:02 MRSCRLRGSCL  
HLA-C12:03 ISKPFMSL  
HLA-A02:01 LLLHCSVSKA  
HLA-A02:01 KLTVSQGQSV  
HLA-A02:01 CLISGEPQPDV  
HLA-C12:03 YPKSRKATA  
HLA-C12:03 DNYPGGIDL  
HLA-A02:01 KLTLSSNSL  
HLA-C12:03 GASEHANTA  
HLA-A02:01 HLEKQTALV  
HLA-C12:03 LFFSRCHHY  
HLA-C12:03 ITDFGHSEI  
HLA-C06:02 TRWVGKVKES  
HLA-B18:01 REASGKCF

HLA-C12:03 NSPRTLPSL  
HLA-DRB107:0 QKVLLHMLSHPLI  
HLA-DRB107:0 GSRCLLLHCSVSK  
HLA-DQA101:C MSAFSLALALVSS  
HLA-DRB107:0 GSLRKLTSSNSLF  
HLA-DRB107:0 EARLVVLVIANTM  
HLA-DRB107:0 DISKPFMSLGISIM  
HLA-DRB107:0 VVITRDNINTHSLI  
HLA-DQA102:C DVSIHGAVGASEI  
HLA-DRB107:0 SAHSINYSMLGKI  
HLA-DQA101:C EKRYIASYLALTAV  
HLA-DQA101:C VIQAANVSALYKC  
HLA-DRB107:0 PVKLTVSQGQSVI  
HLA-DRB107:0 HFKVLRASGKCF  
HLA-DRB113:0 VETIVISTDVANV  
HLA-DQA101:C FLIQQQYSQVLAC  
HLA-DRB113:0 KLDVSFQRSFRVC  
HLA-DRB107:0 KTLCKLFFSRCHH  
HLA-DRB107:0 YFGVMFFLNIAM  
HLA-DRB113:0 HSEILGETSLMRT  
HLA-DQA101:C VPEKMSSLSILFSC  
HLA-DQA102:C FSRMGESLEPASL  
HLA-DRB107:0 YGNSKKGLKAYSL  
HLA-DQA102:C GGIDLVTDEAEAS  
HLA-DQA101:C DVTWFQNGVLLK  
HLA-DRB107:0 AIPPCWVTRWC  
HLA-DQA101:C SCRLRGSLARTC  
HLA-DQA102:C EAQQSSLAPPAI  
HLA-DQA101:C LYHLEKQTALVGC  
HLA-DQA102:C YPKSRKATASAW  
HLA-DQA102:C PSLRGKARTGGPI  
HLA-A02:01 AMIFFIYAI  
HLA-B27:05 RRELQLPLFL  
HLA-A02:01 KVYEENYFFI  
HLA-A02:01 TIVENHTAYLV  
HLA-A02:01 NLINLEIML  
HLA-B51:08 FPKSCIDAMEI  
HLA-B27:05 ARQLVFTAF  
HLA-A02:01 DMCEYDVPYHI  
HLA-A02:01 CQGFGSIFVV  
HLA-A02:01 KQSENDLNKV  
HLA-B27:05 VRALSGSATL  
HLA-A02:01 SLATTSQNGA  
HLA-A02:01 RQVGETVNLRI  
HLA-C16:02 SSSQSTPPM  
HLA-A02:01 CVIMNRSVA  
HLA-A02:01 SANGCTDWSI

HLA-B51:08 FDTERADGTI  
HLA-B51:08 MANEDYPC  
HLA-DRB115:0 IFKCMLYLKYPKTI  
HLA-DQA101:C VRALSGSATLVSS  
HLA-DRB107:0 AMIFFIYAIIGMQI  
HLA-DRB107:0 QTYIRQVGETVNI  
HLA-DQA102:C ATTSQNGAPALV  
HLA-DQA102:C AGCQGFSGSIFVV/  
HLA-DRB107:0 CEYDVPYHIRLSIC  
HLA-DQA102:C TAAATSTPVSSSQ  
HLA-DQA101:C WNVKKNKASKVYE  
HLA-DQA101:C SSGAEFILAGLTQI  
HLA-DRB115:0 IVAIASYTGYNQEI  
HLA-DQA102:C LVFTAFTEEFLAAI  
HLA-DQA101:C FEGNLINLEIMLKI  
HLA-DQA101:C AMEIDPSMLEVA  
HLA-DRB107:0 ENDLNKVLESTRF  
HLA-DQA102:C TERADGTISSEIKS  
HLA-DRB107:0 FTQSLKVVTKRGS  
HLA-DQA102:C DYPCPCDIGHRLE  
HLA-B58:01 HSTGLRSLW  
HLA-A11:01 TTKPAPTPPK  
HLA-A11:01 SSLQSGVPSK  
HLA-A11:01 TANMEQIMK  
HLA-B35:01 TPADTSTPV  
HLA-B58:01 RQGDVECQW  
HLA-A11:01 YTLNNTHHSR  
HLA-A11:01 YLTPIKHLRK  
HLA-B35:01 EPPVVETEM  
HLA-A11:01 CLLLWVKQRK  
HLA-C03:02 FGSKVHSPV  
HLA-B35:01 TPKEVPDTPM  
HLA-B58:01 SSAEVVVPC  
HLA-C03:02 RQQEREREL  
HLA-B58:01 VSSVNSPPPQ  
HLA-B35:01 RPRLAASL  
HLA-B58:01 GSGCGGCGSGC  
HLA-DRB116:0 YLTPIKHLRSLKII  
HLA-DRB113:0 LQLIEGKPPVVETI  
HLA-DRB116:0 LTCLLLWVKQRKI  
HLA-DQA101:C NELQNLSSAEVV  
HLA-DQA101:C LIYAASSLQSGVP  
HLA-DQA101:C RELQHRYADLLE  
HLA-DQA101:C HSPVSEILFNDEM  
HLA-DQA101:C RRRPRLAASLQISI  
HLA-DQA101:C WTANMEQIMKA  
HLA-DQA101:C LRSLWMTITQCYI

HLA-DQA101:C PVTSSAISTLSTTP  
HLA-DRB113:0 TPKEVPDTPMNV  
HLA-DRB116:0 RQALKVTVTSRA  
HLA-DQA101:C WTECIKPVVQEVI  
HLA-DRB113:0 FKLKEVSSVNSPPI  
HLA-DQA101:C TKEPAPTTTKPAP  
HLA-DQA101:C CGGCGSGCGGCS  
HLA-B55:01 RPIPLRFSV  
HLA-A24:02 HYGQPVLSVW  
HLA-A26:01 FVSEDNAAF  
HLA-A24:02 PYRSAFYVL  
HLA-B55:01 SPKGAPTPPA  
HLA-B55:01 EPLVASGVPA  
HLA-A26:01 PTVAVLGGL  
HLA-A26:01 EVLALLITAR  
HLA-A24:02 EWNGMEWNGI  
HLA-A24:02 LWVKQRKDLL  
HLA-B55:01 DPNRKPVSRIV  
HLA-B55:01 MMKIRSCA  
HLA-B35:03 DPPRHQASDL  
HLA-DQA105:C FEPLVASGVPASF  
HLA-DQA105:C DLVSGLSPTVAVL  
HLA-DQA105:C SPKGAPTPPAATF  
HLA-DQA105:C QLCSHYGQPVLS  
HLA-DQA105:C QPLGIAYLDDFVS  
HLA-DRB114:5 RKDLLHLCKKLLK  
HLA-DQA105:C QPYRSAFYVLEQC  
HLA-DQA105:C ALLITARCVVPALI  
HLA-DQA105:C EWNGMEWNGIE  
HLA-DQA105:C IPLRFSVGPLCVEC  
HLA-DQA105:C NWFWEQDDTSF  
HLA-DQA105:C PRHQASDLENEEI  
HLA-DRB112:0 EEEMMKIRSCAEI  
HLA-C07:01 FRSETTKAQKM  
HLA-B35:01 TPSGTDITL  
HLA-B35:01 YPCAAGAGSF  
HLA-B08:01 VMNHRCCVL  
HLA-C07:01 PTYSNRETI  
HLA-C07:01 QRTPPPPGK  
HLA-B35:01 SPPDVASAAPL  
HLA-C07:01 KRLLLMEDD  
HLA-B08:01 TSFCKILGPL  
HLA-B35:01 HITLQGDPL  
HLA-B35:01 QPQGTPPPPG  
HLA-C07:01 ISDPEGDDE  
HLA-DRB101:0 ITSFCKILGPLSYSK  
HLA-DRB101:0 PFHYVTVMNHRC



HLA-DRB101:0 SSAFRSETTKAQK  
HLA-DRB101:0 PPDVASAAPLRTI  
HLA-DRB101:0 TQMYHYPCAAG/  
HLA-DRB103:0 KAVLETEKRLLLM  
HLA-DRB103:0 GTDITLDTTLSATE  
HLA-DRB101:0 EVAHITLQGDPLR  
HLA-DQA105:C RKQLVIYEEISDPE  
HLA-DRB101:0 TYSNRETIYPNASI  
HLA-DRB101:0 QGGNQSQRTPPI  
HLA-A03:01 KTYTQSSHLK  
HLA-A03:01 SLHGWTGTDK  
HLA-A03:01 LLFSNTATQK  
HLA-A03:01 SVATYSPWIK  
HLA-C07:01 ARIVCGTIM  
HLA-C08:02 TGDASKSAL  
HLA-C08:02 LADGRPLL  
HLA-C08:02 LIDQELLSI  
HLA-A03:01 ALMVACTWLH  
HLA-C08:02 ISTPDQTEV  
HLA-C08:02 TESELATAL  
HLA-A03:01 SQGPPPHPGK  
HLA-C08:02 GCDVGPDGRPL  
HLA-C07:01 RRFVEACI  
HLA-B08:01 MERDFLPSL  
HLA-C08:02 WAEEPGGHA  
HLA-C08:02 QATPTGSGE  
HLA-A03:01 LLNESIVANY  
HLA-B08:01 SVKESFCYV  
HLA-C08:02 GLNNVLGSI  
HLA-DQA105:C TESELATALALAST  
HLA-DQA105:C CTWLHALTFPAA  
HLA-DQA105:C IMAGELSLMAAL  
HLA-DQA105:C TVYALAVISTPDQ  
HLA-DQA105:C NVLGSIAYGITITV  
HLA-DQA105:C RRRFVEACIAREA  
HLA-DQA105:C VDISNLEAALWAI  
HLA-DRB103:0 MEMERDFLPSLK  
HLA-DRB113:0 SASLLLNESIVANY  
HLA-DRB103:0 GCDVGPDGRPLR  
HLA-DQA105:C PGVYTSVATYSPV  
HLA-DRB113:0 KSKLLFSNTATQK  
HLA-DRB103:0 LKKCLIDQELLSIAI  
HLA-DRB113:0 TDKNFVSKIIAENI  
HLA-DRB113:0 DKNFVSKIIAENIY  
HLA-DQA105:C ATTGDASKSALLK  
HLA-DQA105:C PTGSGEHGAFPVI  
HLA-DRB113:0 SFCYVNLTCSGK

HLA-DRB103:0 EGPEDLADGRPLI  
HLA-DQA105:C CDYAGCGKTYTQ  
HLA-DQA105:C PPQGGNQSQGP  
HLA-C07:01 LRHPLSSLM  
HLA-C07:01 YRHMLNMKGL  
HLA-B15:132 LQVQLFVAF  
HLA-C12:03 LANPEKEFL  
HLA-C12:03 LASNRLPSL  
HLA-C12:03 GALEPGVAL  
HLA-A02:05 AMSLLWRV  
HLA-B15:132 SQIFIGLTY  
HLA-A02:05 WLYYHVQLQA  
HLA-A02:05 SQGEDCPPV  
HLA-A02:05 NLWKMALLAV  
HLA-C07:01 IRVSQHKHL  
HLA-C07:01 ASILRKRGR  
HLA-DRB107:0 FSFLDLESLRSLHL  
HLA-DRB107:0 SFLDLESLRSLHLA  
HLA-DRB107:0 LDLESLRSLHLAS  
HLA-DRB107:0 FLDLESLRSLHLAS  
HLA-DRB107:0 MSLLWRVSVTAV  
HLA-DRB107:0 WLYYHVQLQASEP  
HLA-DRB107:0 SPLSIKIFPTNIRVS  
HLA-DRB107:0 IFIGLTYQRLKHA  
HLA-DRB107:0 DALGLRHPLSSLM  
HLA-DRB107:0 ATFKLCAGSSYRH  
HLA-DRB107:0 AGELESGSASILR  
HLA-DRB107:0 RKKIYFKNSENLW  
HLA-DRB107:0 ELQVQLFVAFLVI  
HLA-DRB107:0 MERMSLKTRLAL  
HLA-DRB107:0 SVPTLQKGHQNA  
HLA-DQA102:C PRTLDDYWQALEI  
HLA-A02:01 WLFYGVHIL  
HLA-A02:01 LLNTLLYSL  
HLA-A23:01 MYGMNYFAI  
HLA-A02:01 ALVSFTCVSYV  
HLA-A02:01 ILLTCLYL  
HLA-A02:01 ILPEQSVSI  
HLA-A23:01 HYQNSSAFKF  
HLA-B44:02 HENHPYPNI  
HLA-A02:01 LLPSSVHSA  
HLA-A02:01 ALLRGVQCQL  
HLA-A02:01 KMPSFGVLA  
HLA-A02:01 SLSTNLQENL  
HLA-A02:01 KMPPEMHFKT  
HLA-A02:01 KAFRFPSSV  
HLA-A02:01 LVSYQVHKHGV

HLA-B44:02 SEAGTHSTTPV  
HLA-A02:01 RNAEITLQMV  
HLA-B44:03 KESTLHLVLR  
HLA-A23:01 KSSTTVPSF  
HLA-C05:01 FTSSRSFQGH  
HLA-A02:01 RLSGGGGGGGT  
HLA-C05:01 YSQTDRQDQSY  
HLA-B44:02 REKRRRQEL  
HLA-A02:01 KLHRKAG  
HLA-DRB107:0 RIKNLLRSPSIKLI  
HLA-DRB107:0 WFLHYQNSSAFK  
HLA-DRB107:0 VSYVVTKAHPAL  
HLA-DRB107:0 GKAFTRSRFQGF  
HLA-DRB107:0 QIALVYTFVTPLLI  
HLA-DRB107:0 FLFVVSYWLFYGV  
HLA-DRB107:0 IMRSFSLSTNLQE  
HLA-DRB107:0 YNIQKESTLHLVLI  
HLA-DRB107:0 GKAFRFPSSVRRF  
HLA-DRB107:0 KFKMPKFKMPSF  
HLA-DRB107:0 AISISSIPLLPSSVH  
HLA-DRB107:0 MNYFAIRNKKGT  
HLA-DRB107:0 ILLTCLYLSYSYMG  
HLA-DRB107:0 QHNLVSYQVHKF  
HLA-DRB107:0 LKMPPEMHFKTPK  
HLA-DRB107:0 WVFLVALLRGVQ  
HLA-DQA102:C DQGRNAEITLQM  
HLA-DRB107:0 QTCFSLELRGPPIL  
HLA-DRB107:0 HANGLAKSSTTVI  
HLA-DQA102:C PVSTTPVVSSEAG  
HLA-DRB107:0 QIPWRPSQPNIHI  
HLA-DQA102:C EEVQQEEEQLLRE  
HLA-DRB107:0 MSRRAPGSRLSG  
HLA-DQA102:C DRQGQSSHYSQT  
HLA-C12:03 KAFNQSSHL  
HLA-C12:03 YGYGCYCPSYY  
HLA-C12:03 DPYRVHYTV  
HLA-C12:03 SPFHPIRRV  
HLA-B18:01 EEYLNFDY  
HLA-C12:03 TPYQTPKSV  
HLA-C12:03 FSLRVHSV  
HLA-C12:03 VIWHWTQVV  
HLA-C12:03 IAAAQSGLLV  
HLA-A03:01 KSMLARLSK  
HLA-C12:03 KSQDLGSII  
HLA-C12:03 KALSHSSSF  
HLA-C12:03 FQNGKMASL  
HLA-A25:01 HTILTTSNSF

HLA-C12:03 FIRTPQTL  
HLA-A03:01 IIHTGEKPYK  
HLA-A03:01 LMGAQRACPK  
HLA-C12:03 FMWAPGPI  
HLA-C12:03 IARYVHIVPL  
HLA-A03:01 ITGLATCIHK  
HLA-C08:02 LLDEKGPEV  
HLA-A03:01 ATGGSWSQK  
HLA-C12:03 ITQSGDLSY  
HLA-C12:03 YQALVHSV  
HLA-C12:03 WLHKRGKYI  
HLA-C12:03 YVISGNGNGKL  
HLA-C12:03 MALLTSNSCFI  
HLA-A03:01 AIHQKKAQ GK  
HLA-C12:03 WQFGHQ TGYF  
HLA-C12:03 STWDKV TDAV  
HLA-C12:03 DARDGPSHS  
HLA-C08:02 LIDGTETTA  
HLA-C12:03 FVGHQGAV  
HLA-C12:03 YSQTDRQDQSY  
HLA-C08:02 NSDDSSNDN  
HLA-C08:02 SSDSEVHSG  
HLA-C08:02 VTQKWASRL  
HLA-C08:02 SPDRNPELS  
HLA-A25:01 STPLPLSSG  
HLA-DRB113:0 RGKYIKTWRPRYF  
HLA-DQA105:C IALKLIAAAQSGLL  
HLA-DRB113:0 LSPFHPIRRVAVKI  
HLA-DRB113:0 TSNSCFIRCNEAG  
HLA-DQA105:C RDGPSHSAGANL  
HLA-DQA105:C KGAALVSPISKSM  
HLA-DQA105:C PLHSAPITGLATCI  
HLA-DRB113:0 KTKIFIRTPQTLFTI  
HLA-DRB113:0 QFERFNQANTILK  
HLA-DQA105:C LEGHVHMAAVDI  
HLA-DQA105:C RNKLGHSRASVIV  
HLA-DRB113:0 GKALSHSSSFRRH  
HLA-DRB113:0 QIGNLFSLRVHSV  
HLA-DRB113:0 TLLLVMLMGAQF  
HLA-DQA105:C TRKSGATGGSWS  
HLA-DQA105:C CKGTFVGHQGAV  
HLA-DRB113:0 GKAFNQSSHLTRI  
HLA-DQA105:C VEWYQALVHSV  
HLA-DRB113:0 SWDYKV TQKWA  
HLA-DQA105:C PPFMWAPGPIHY  
HLA-DRB113:0 CVIGHIAKHLPKS  
HLA-DRB113:0 MSYVISGNGNGK

HLA-DRB113:0 RHTILTTSNSFPYV  
HLA-DQA105:C YCPSYGGYGFSC  
HLA-DQA105:C NNFTKSGSTPLPL  
HLA-DQA105:C QTPKSVRRGVAP'  
HLA-DQA105:C GNDIFQAVETAIH  
HLA-DRB113:0 LQHPIIARYVHIVF  
HLA-DQA105:C RVHYTPPYAEGV'  
HLA-DQA105:C SDSEVHSGGSHRI  
HLA-DRB113:0 FWQFGHQGTGYF)  
HLA-DQA105:C KEKEGVLHVPITQ  
HLA-DQA101:C QLEEYLNFDYFC  
HLA-DRB113:0 SNLTKHKIIHTGEK  
HLA-DQA105:C LLDEKGPEVLQDS  
HLA-DQA105:C GQTDRQGQSSH)  
HLA-DQA105:C PDRNPELSSSRDR  
HLA-DQA105:C SNDNSDDSDVPC  
HLA-A31:01 RRRQLHHR  
HLA-A02:01 YFLDKAFFM  
HLA-A02:01 SLTGLHFKI  
HLA-A31:01 HVSSNSTR  
HLA-A02:01 NLQTPMYFFL  
HLA-C15:02 LTLERNPMSV  
HLA-A02:01 AIVDFVGWL  
HLA-C15:02 RSTDLTTHKII  
HLA-A02:01 RIIWCPFV  
HLA-C15:02 RSTDLTTHKKV  
HLA-A31:01 QLRREQELR  
HLA-A31:01 ANTTVGHIR  
HLA-C15:02 ATATIVFI  
HLA-A31:01 TSVPWIKFK  
HLA-A02:01 WMAGDETQPT  
HLA-C15:02 NSDDSEAPD  
HLA-DRB104:0 LCMILLIRTNSNLC  
HLA-DQA103:C AADATATIVFIEDI  
HLA-DRB104:0 DLKAFFMSKALNI  
HLA-DRB104:0 KAFNRSTDLTTHK  
HLA-DRB104:0 LKCLVFSLTGLHFH  
HLA-DRB104:0 MKGLTLERNPMS  
HLA-DRB104:0 VPWIKFKSNCYSF  
HLA-DRB104:0 EVKFVWMAGDE  
HLA-DRB104:0 FVGWLCVSMDI  
HLA-DRB104:0 LNHFRRIIWCPFV  
HLA-DRB104:0 TFWCSLQRSRRQ  
HLA-DRB104:0 APNFEANTTVGH  
HLA-DRB104:0 HINSNHVSSNSTR  
HLA-DQA103:C PDDNSDDSEAPD  
HLA-DQA103:C LRREQELRREQEE

HLA-C12:03 KAFRFPSSV  
HLA-A02:01 VLQGMALFAL  
HLA-C12:03 AAFPRGVPGAL  
HLA-A02:01 SMSVSTMSV  
HLA-A02:01 YMVTERTTYI  
HLA-C12:03 PTYSGRETV  
HLA-C12:03 KEFQSLETV  
HLA-A02:01 GLTRSLGPPV  
HLA-A02:01 YLARALFTC  
HLA-A02:01 VLWAVCYCC  
HLA-C12:03 YVHQVGRTA  
HLA-A02:01 SLLNHMANYT  
HLA-C12:03 SQMLASSTM  
HLA-A02:01 SLSKGDALL  
HLA-C12:03 FGSGYVLKTV  
HLA-B38:01 EHSTFDVL  
HLA-C12:03 VTAEILEPGTL  
HLA-C12:03 KSISTRSVV  
HLA-A02:01 ALQAQPLRPQL  
HLA-C12:03 RAYQRAAEK  
HLA-C12:03 YSDDMPLPT  
HLA-C12:03 YPSECEVT  
HLA-A02:01 VLDDedrNL  
HLA-C12:03 KVFRVNKV  
HLA-C12:03 FVQSGPTKGF  
HLA-C12:03 VTAGQERFRAV  
HLA-A02:01 KSLLSFPKSV  
HLA-C12:03 SSDEKDSVL  
HLA-C12:03 RVHTEKKHY  
HLA-A02:01 VMQELEDYS  
HLA-C12:03 SVDRSVHSG  
HLA-C12:03 SKDPPGQEA  
HLA-A66:01 ETQRFYACS  
HLA-DRB111:0 SVFLRFRTTRAYQR  
HLA-DRB111:0 STFDVLDrrRLGF  
HLA-DRB111:0 HSTFDVLDrrRLC  
HLA-DQA105:C GALWARVARAE/  
HLA-DQA105:C DLLGGLSGGSIQV  
HLA-DQA105:C QVGRtarAGRAc  
HLA-DQA105:C VSTMSVASSEAST  
HLA-DQA105:C GLTRSLGPPVALA  
HLA-DQA101:C CLHYLAQALQAQ  
HLA-DRB111:0 SGKIVIARYGKVFf  
HLA-DQA105:C STRSVVESIASPAf  
HLA-DRB111:0 SLLYRLKFKEFVQs  
HLA-DQA105:C LKTvQSSPGVAKC  
HLA-DRB111:0 EVVLYLARALFTCI

HLA-DQA105:C MSLSKGDALLAL  
HLA-DQA101:C ASNTMDSQMLA  
HLA-DQA105:C SLENGGPSSLESK  
HLA-DRB111:0 KQCGKAFRFPSSV  
HLA-DQA105:C RNTTNTSVTAEILI  
HLA-DRB111:0 TLLFVKVTQGKEE  
HLA-DRB111:0 RPKVSSLLNHMA  
HLA-DQA105:C TSYVVDGQIIYGF  
HLA-DRB111:0 KYASFSNHQRVH  
HLA-DQA105:C KLQIWVVTAGQER  
HLA-DQA101:C VDLSSNNISELQT  
HLA-DRB111:0 NKSLTSFPKSVEI  
HLA-DRB111:0 HNKYMTERTTY  
HLA-DQA101:C FRNQDVQKVLW  
HLA-DQA101:C VKEMLKSVMQEL  
HLA-DQA105:C WKEGREIARVLDI  
HLA-DQA105:C EIIINYNGYPSECE  
HLA-DQA105:C VDRSVHSGSHHS  
HLA-DQA105:C SSDEKDSVLNIAR  
HLA-DRB111:0 RDRDRSVRGKYSI  
HLA-B08:01 GASGRFVAL  
HLA-C07:01 TDFGHSEIL  
HLA-C07:01 LRVQEERLH  
HLA-B57:01 TTAFMGVYVLPW  
HLA-C06:02 QRKCLISSV  
HLA-B57:01 MALAGQPGGPF  
HLA-A01:01 FSDSRIALK  
HLA-C07:01 SNYPAPRAV  
HLA-B57:01 ITALATLHLLF  
HLA-B08:01 SLKVLITINCM  
HLA-A01:01 QSEKGVIVQY  
HLA-C07:01 KRTALIKAI  
HLA-A01:01 YQENITNTCY  
HLA-C06:02 MVNEGVKAD  
HLA-DRB101:0 IGIILLLATMTTAFI  
HLA-DRB101:0 PFIITALATLHLLFL  
HLA-DRB101:0 KGVFLGASGRFV  
HLA-DRB101:0 AGGLRLTPGGMA  
HLA-DRB101:0 NTCYKYLHEALMI  
HLA-DRB101:0 FMAVKFSDSRIAL  
HLA-DRB101:0 KTSKVLITINCM  
HLA-DRB101:0 HSEILGETSLMRT  
HLA-DRB101:0 AQALVEQMVNE  
HLA-DRB101:0 SRNILYTQSEKGV  
HLA-DRB101:0 NSSNYPAPRAVL  
HLA-DQA101:C KKRTALIKAIQCQI  
HLA-DQA101:C RKCLISSVEDFTEF

HLA-DRB101:0 QEERLRVQEERLF  
HLA-C05:01 VLDTALSLL  
HLA-C15:02 MSMHTTMTTL  
HLA-B44:02 QEVEVNRKW  
HLA-B44:02 QEVEVNCNW  
HLA-B44:02 QENDMMEVPY  
HLA-B44:02 LEMYGMNYFAI  
HLA-B44:02 AEGIGIVLF  
HLA-A01:01 FLICLLVLY  
HLA-C05:01 VLDGEEARTI  
HLA-C15:02 HSPGAFGNM  
HLA-C05:01 TCDFADGER  
HLA-C05:01 GGNQPQGTP  
HLA-B44:02 KEHQQRQ  
HLA-DRB107:0 LLVLYALFLTLLTK  
HLA-DRB107:0 GAWAGVLDTALS  
HLA-DQA101:C EVNCNWILPILTO  
HLA-DRB107:0 SMHTTMTTLTLT:  
HLA-DQA102:C WNIGLAEGIGIVL  
HLA-DRB107:0 GAFGNMERITSP'  
HLA-DRB107:0 MNYFAIRNKKGT  
HLA-DQA102:C GREEARAVLDGEI  
HLA-DQA102:C YFEQENDMMEV  
HLA-DQA102:C ERVWLWTTCDF/  
HLA-DRB107:0 AKLTRARDKEHQ  
HLA-DQA102:C PPPQGGNQPQG'  
HLA-B15:03 KKIVHSVVSFF  
HLA-B15:03 SKMGKWFHPRF  
HLA-B15:03 AMQELENY  
HLA-B15:03 CQEDERVLM  
HLA-B15:03 GQLHEVPV  
HLA-B15:03 KERLKSVM  
HLA-B15:03 VAFSLACII  
HLA-B35:01 LPQGTPTSL  
HLA-C07:01 LRVQEERLH  
HLA-B15:03 KKIPEVGGKEL  
HLA-B15:03 SRTCQLDQF  
HLA-B15:03 AKRVPTAPAAI  
HLA-A30:02 KTDKAVECY  
HLA-B35:01 EAMIFGIGL  
HLA-B35:01 LPPPTPAL  
HLA-C07:01 ASGLPDKEE  
HLA-B35:01 KPTPTTPEE  
HLA-C07:01 EEDEDEEEE  
HLA-DQA105:1 AKRVPTAPAAISK  
HLA-DQA105:1 RRQVTVAPASGLI  
HLA-DRB109:0 IKKIVHSVVSFAF



HLA-DQA105:1PPTPALGPPAPRC  
HLA-DQA105:1AHRFLGLLYELEEI  
HLA-DQA105:1IKVEVAFSLACIILC  
HLA-DRB109:0 QFHHSRGSFPFKKI  
HLA-DQA105:1ALAHFLPQGTPTS  
HLA-DRB111:0 FDLRSKMGKWFH  
HLA-DRB111:0 LESVKEMLKSAM  
HLA-DQA105:1LDQFSCGNGRCIF  
HLA-DQA105:1EAMIFGIGLCDNC  
HLA-DRB109:0 NKKVQQLHEVPV  
HLA-DQA105:1ALIKAVQCQEDEF  
HLA-DQA105:1REQEERLRVQEEF  
HLA-DQA105:1TTPEELAPTTPEKI  
HLA-DQA105:1EEEEDEEDEDEE  
HLA-A68:02 TTAAPPTPPA  
HLA-A68:02 HSAHCSFYL  
HLA-A68:02 TVSKVTVQSV  
HLA-A68:02 EAERVISSV  
HLA-A68:02 TAIRCFGVYV  
HLA-A68:02 DTSSASTGQA  
HLA-C08:02 VLDSLENLL  
HLA-A68:02 LSASASYAA  
HLA-A68:02 ETLTPYIPM  
HLA-A68:02 LLTTLTFHV  
HLA-A68:02 ETPAIKEPD  
HLA-A24:02 SFMSNNGPF  
HLA-C08:02 NTDSAGTL  
HLA-C08:02 QIDKLWAEI  
HLA-A68:02 QVSSSSLVRI  
HLA-B14:02 FKRRRLNRI  
HLA-C08:02 HSDEQNDTQ  
HLA-A68:02 DTTDDLML  
HLA-A68:02 VTNPPDVDGV  
HLA-A68:02 HSSWKNVPSI  
HLA-B14:02 TRRCASPSNSM  
HLA-A68:02 HTHDQVVMFF  
HLA-B35:02 NPDPDSLQLF  
HLA-B14:02 KAARRSTEA  
HLA-C08:02 YIDDQKKKC  
HLA-C08:02 FLEKVLEI  
HLA-A68:02 KVRKIQNHI  
HLA-A68:02 FVCHRTQKEI  
HLA-C08:02 IGQGPPLPP  
HLA-C08:02 KISPHGLET  
HLA-DRB101:0 VRIFQLLLSHKDSI  
HLA-DRB101:0 HCSFYLTRTLQTL  
HLA-DRB101:0 LEKVLELSGWRA

HLA-DRB101:0 VSEYLKISPHGLET  
HLA-DRB101:0 QVVMFFKASRES  
HLA-DRB101:0 SLQLFNVRGVLRF  
HLA-DRB101:0 LGCHLLTTLTFHV  
HLA-DRB101:0 LRQIDKLWAELRF  
HLA-DRB101:0 MNKVRKIQNHIQ  
HLA-DRB101:0 VPSINRLKSTLDP  
HLA-DRB101:0 YVSNITAIRCFGV  
HLA-DRB101:0 RLFKNLSLIKKYIDI  
HLA-DRB101:0 QVTISGAAGAAA  
HLA-DRB101:0 AERVISSVISVSM  
HLA-DRB101:0 DTTDDLMLGRV  
HLA-DRB101:0 ASSFKRRRLNRIPI  
HLA-DRB101:0 LDSFMSNNGPFC  
HLA-DRB101:0 ISEVLDSLENLLRH  
HLA-DRB101:0 ANSFTVSKVTVQS  
HLA-DRB101:0 MAFKWRGKPLF  
HLA-DRB101:0 SPSNSMQLASRS  
HLA-DRB101:0 KIYVTIPKKRETPA  
HLA-DRB101:0 SENSVIGQGPPLP  
HLA-DRB101:0 TLGTLRFVFLGL  
HLA-DRB101:0 ELDLELTPYIPMI  
HLA-DRB101:0 RLKEQEGRKAARI  
HLA-DRB101:0 SASTGQATPLPVT  
HLA-DRB101:0 NGTYTCQVTNPP  
HLA-DRB101:0 TQKQLSEEQNTG  
HLA-DRB101:0 PTPPATTPAPLSS  
HLA-A68:02 MVILATSTV  
HLA-A24:02 KYLMFLFNF  
HLA-A68:02 TTAEGTDIPI  
HLA-A68:02 TVSKVTVQSV  
HLA-A68:02 EAERVISSV  
HLA-C08:02 VLDSLENLL  
HLA-A68:02 LSASASYAA  
HLA-A68:02 DIIKPMFVI  
HLA-A68:02 ETLTPYIPM  
HLA-C08:02 ITDFGHSEI  
HLA-A68:02 MNVRVMSTI  
HLA-A68:02 DMVLVTMVV  
HLA-A68:02 ETPAIKEPD  
HLA-B14:02 WLHRRRLPL  
HLA-C08:02 MDDWELIPF  
HLA-C08:02 DVDCILDEL  
HLA-A68:02 QVSSSSLVRI  
HLA-B14:02 FKRRRLNRI  
HLA-C08:02 FQDGAIQEAV  
HLA-C08:02 STDNNQTYP

HLA-C08:02 HSDEQNDTQ  
HLA-C08:02 RSEYRGALL  
HLA-A68:02 HSSWKNVPSI  
HLA-C08:02 SSDWSQRFP  
HLA-B14:02 TRRCASPSNSM  
HLA-A68:02 HTHDQVVMFF  
HLA-A68:02 DVIRPGMWRKV  
HLA-A68:02 HHHKQQMVS  
HLA-C08:02 WDDDRDEKT  
HLA-C08:02 GCCKRQAEI  
HLA-B14:02 PRYRWRTQS  
HLA-A68:02 CTHTQRSPQSL  
HLA-A68:02 KVRKIQNH  
HLA-A24:02 SYHKKIHTG  
HLA-C08:02 KISPHGLET  
HLA-B14:02 NHQRVHTEK  
HLA-A68:02 DIRREMYII  
HLA-B14:02 LQQKPGDSTM  
HLA-DRB101:0 VRIFQLLSHKDSI  
HLA-DRB101:0 VKMNVVRVMSTIL  
HLA-DRB101:0 GMDMVILATSTV  
HLA-DRB101:0 RLPLQPIRPLPRF/  
HLA-DRB101:0 VSEYLIKISPHGLET  
HLA-DRB101:0 RREMYIIKEGKLA'  
HLA-DRB101:0 QVVMFFKASRES  
HLA-DRB101:0 IIKPMFVINEMRR  
HLA-DRB101:0 HSEILGETSLMRT  
HLA-DRB101:0 MNKVRKIQNHIO  
HLA-DRB101:0 LFNFFIFLGGACLL  
HLA-DRB101:0 VPSINRLKSTLDP(  
HLA-DRB101:0 NFEYTLASKSLQ(  
HLA-DRB101:0 QVTISGAAGAAA!  
HLA-DRB101:0 AERVISSVISVSM!  
HLA-DRB101:0 KFLFDMVLVTM  
HLA-DRB101:0 RSEYRGALLWMK  
HLA-DRB101:0 DVHHKQQMVS\  
HLA-DRB101:0 ASSFKRRRLNRIPI  
HLA-DRB101:0 ISEVLDSLENLLRH  
HLA-DRB101:0 ANSFTVSKVTVQ!  
HLA-DRB101:0 QEAVVWEAASM  
HLA-DRB101:0 IKTADLKVVLGKF'  
HLA-DRB101:0 DFFLLLSKFGCKF  
HLA-DRB101:0 SPSNSMQLASRS/  
HLA-DRB101:0 KIYVTIPKKRETPA  
HLA-DRB101:0 VVFKDVIRPGMW  
HLA-DRB101:0 LQQYGYLPPGDL(  
HLA-DQA101:C EMDDWELIPFVV

HLA-DRB101:0 SKYASFSNHQRVI  
HLA-DRB101:0 QTYPYSIQIMNYYC  
HLA-DRB101:0 KWSSTLSYHKKIH  
HLA-DQA101:C AWAKLDVDCILD  
HLA-DRB101:0 ELDLETLTPYIPMI  
HLA-DRB101:0 QPRYRWRTQSSC  
HLA-DRB101:0 SSDWSQRFPRM  
HLA-DRB101:0 TQKQLSEEQNTG  
HLA-DRB101:0 TDIPSTPSEGSTP  
HLA-A02:01 FAFDCPYLV  
HLA-B07:02 LPRQAKTAA  
HLA-A02:01 LLAEKEPEV  
HLA-A02:01 SLLNVYYII  
HLA-A02:01 SMPVSTMPV  
HLA-A03:01 RIHTGEKPYK  
HLA-A03:01 KIHTGEKPYK  
HLA-A02:01 ALSFADVAV  
HLA-A02:01 FTIFHLHSL  
HLA-B07:02 TPSEQLTPL  
HLA-A03:01 IIHTGEKPYK  
HLA-A02:01 NLLSTHDAVV  
HLA-A02:01 IQWNIRAFNV  
HLA-A03:01 KTFSIFSTLTK  
HLA-C07:01 RRFSLAEFV  
HLA-A02:01 YLDTTKGAV  
HLA-A02:01 QLAGIDLKV  
HLA-B07:02 SPEKPTIPT  
HLA-B08:01 SILIKHKVI  
HLA-C07:01 NRQGQSSHY  
HLA-A02:01 ALEEQHVGFSL  
HLA-C07:02 YKNPNLTVSF  
HLA-A02:01 VAMQDPVAV  
HLA-A02:01 ALADDMEL  
HLA-B08:01 LKKSCLKEL  
HLA-B08:01 MLRAKPPPP  
HLA-A03:01 KGRGPFWWK  
HLA-A02:01 ALNGNKLINL  
HLA-A02:01 STGQATPLPV  
HLA-C07:01 DRQGQSSHY  
HLA-C07:01 IHGERKEFM  
HLA-C07:01 SHYSQTRDRQ  
HLA-A02:01 EVACDILSQLV  
HLA-B08:01 HLKNRENCSC  
HLA-B07:02 QPSCCQTSSC  
HLA-C07:01 KRIHTGEKP  
HLA-B07:02 APSSTTAE  
HLA-B07:02 FPMALFGK

HLA-A02:01 AVAASKECNGL  
HLA-B07:02 PPQQPGSTK  
HLA-A03:01 CGYGSGWGY  
HLA-C07:01 SSAADGDEE  
HLA-C07:02 SYHKKIHTG  
HLA-A02:01 SEAGTHSTTPV  
HLA-C07:02 EGDAPGPRG  
HLA-C07:01 EAEGDAPGP  
HLA-DRB108:0 FNRFTTLTKHKRIH  
HLA-DRB108:0 FSKFSILIKHKVIHT  
HLA-DRB108:0 TFSIFSTLTKHKIIH  
HLA-DRB115:0 NVYYIIILAWATYY  
HLA-DRB108:0 FSRFSYLTAHKIIH  
HLA-DRB108:0 CNGLSLAALKKAL  
HLA-DRB108:0 SEMKMRLPRQAI  
HLA-DRB108:0 PYLVVKITPAIPAV  
HLA-DRB115:0 AFNVVKNWSWN  
HLA-DRB108:0 SSTLIKHKKIHTGE  
HLA-DRB108:0 TKGAVETFMKLR  
HLA-DRB108:0 THDAVVQCRKR  
HLA-DRB108:0 PEGEVLMLRAKP  
HLA-DRB108:0 FINFVKNYKNPNL  
HLA-DRB108:0 GDKHKLKSKLKE  
HLA-DRB115:0 PAHFVALNGNKL  
HLA-DRB108:0 LRHSACRRFSLAE  
HLA-DRB115:0 HYLQFTIFHLHSL  
HLA-DRB108:0 KWSSTLSYHKKIH  
HLA-DRB108:0 SILTTHKRIHTGEK  
HLA-DQA101:C PLASMPVSTMPV  
HLA-DQA104:C GALSFADVAVYFS  
HLA-DQA104:C IESSYQVAKALAD  
HLA-DQA101:C SVPVSTMPVVSSI  
HLA-DQA104:C LKAFHSDVAMQ  
HLA-DRB108:0 VENYSNVSIIHLKN  
HLA-DQA101:C RVNLTLDLEQLA  
HLA-DQA104:C SSKESAEVACDILS  
HLA-DQA104:C VTDTSSASTGQA  
HLA-DQA101:C QPYGSSFYALEEC  
HLA-DQA104:C PSSTTAEGTSIPTS  
HLA-DQA104:C DLASCDLTSSAAD  
HLA-DRB108:0 ATSPRLSRELLAEH  
HLA-DRB108:0 MCHWGGCSREL  
HLA-DQA104:C PRGEAEGQAEAE  
HLA-DRB108:0 VNFPQRKKKGRG  
HLA-DQA104:C SNSDGEDFPMAL  
HLA-DRB108:0 PSERQLTPLPPSA  
HLA-DQA104:C GWGYGCGYSSSC

HLA-DRB115:0 SQTDRQDQSYHY  
HLA-DRB108:0 GQCYHYDQTNRC  
HLA-DQA104:C TSSCGTGCGIGGC  
HLA-DRB115:0 TNRQGQSSHYSQ  
HLA-DQA104:C KPTIPTEKPTIPTEI  
HLA-DQA104:C QQPGSTKPPSQQ  
HLA-A02:01 YLMTFLIMTV  
HLA-A02:01 WLWALQLIFV  
HLA-B07:02 LPRQAKTAA  
HLA-A02:01 HLPTCVMPYV  
HLA-A02:01 VLITLPIPI  
HLA-A03:01 AMHGFPTLK  
HLA-A02:01 SLVHYADTV  
HLA-B07:02 RPVSPRCSLL  
HLA-A02:01 ALLTSNSCFI  
HLA-A02:01 SMLTPLQSI  
HLA-B07:02 TPSEQLTPL  
HLA-A02:01 YLEHVVVC  
HLA-A02:01 NLLSTHDAVV  
HLA-C07:01 YRITNHSHFWM  
HLA-B07:02 KPCYPKASV  
HLA-A03:01 TISALNIRK  
HLA-A02:01 QLAGIDLKV  
HLA-B08:01 SILIKHKVI  
HLA-B08:01 YNMNKQCEL  
HLA-A02:01 VLDFMETDLEV  
HLA-A02:01 FMGWADDII  
HLA-A02:01 TVAELLVTI  
HLA-A02:01 GLLGVGIWLSM  
HLA-C07:02 YKNPNLTVSF  
HLA-A02:01 VAMQDPVAV  
HLA-C07:01 LRFGRSWI  
HLA-A03:01 LTYQDQSDNK  
HLA-C07:01 WRSEVDKQL  
HLA-C07:01 SNNSGLRLL  
HLA-B07:02 GPPPADLCHAL  
HLA-A02:01 KVFNDSGNLSI  
HLA-C07:01 KSFNHSSNL  
HLA-C07:02 SRLKVGQIL  
HLA-A02:01 KLKCGTCGA  
HLA-C07:01 SHYSQTRQ  
HLA-B07:02 SASSGDTTPL  
HLA-A02:01 VICEVAHITL  
HLA-A02:01 EVACDILSQLV  
HLA-A03:01 RQNLPEKRYPK  
HLA-B07:02 GPKVKGDAV  
HLA-A02:01 NGIDMAYRV

HLA-C07:01 SSAADGDEE  
HLA-DRB108:0 FSKFSILIKHKVIHT  
HLA-DRB108:0 QLKFRKKKLRFRG  
HLA-DRB108:0 SEMKMRLPRQAI  
HLA-DRB108:0 LIMTVAWAAHTF  
HLA-DRB108:0 SAITYRITNHSHFV  
HLA-DRB108:0 VVVCITITHPRRGI  
HLA-DRB108:0 HLQFLRCISPHSDI  
HLA-DQA101:C VISNNSGLRLLIDC  
HLA-DRB108:0 ENTISALNIRKQTS  
HLA-DRB108:0 KAAMFILTRNVLI  
HLA-DRB108:0 THDAVVQCRKR  
HLA-DRB108:0 FINFVKNYKNPNL  
HLA-DRB108:0 KQMWQYLKPCP  
HLA-DQA101:C PVFQNGKMALLT  
HLA-DRB108:0 QSDNKLYRLQTPC  
HLA-DRB115:0 WLWALQLIFVSTI  
HLA-DRB108:0 NGIDMAYRVLAD  
HLA-DRB108:0 CYPKASVQYYKKI  
HLA-DRB108:0 AFAMHGFPTLKY  
HLA-DQA101:C VICEVAHITLQGD  
HLA-DQA104:C VPSQADVAVFEA  
HLA-DQA101:C LLGVGIWLSMSQ  
HLA-DRB108:0 AELLVTICSRIGIT  
HLA-DRB108:0 TCGAIGHMRTNK  
HLA-DRB115:0 HSSNLIQHQSIHA  
HLA-DQA104:C LKAFHSDVAMQI  
HLA-DRB108:0 DSGNLSIHKRIHTC  
HLA-DQA101:C RVNLTLDLEQLA  
HLA-DQA101:C KPEAHFSLVHYAC  
HLA-DQA104:C SSKESAEVACDILS  
HLA-DRB115:0 PVSPRCSLLLTHYI  
HLA-DQA101:C KSNISLVLDFMET  
HLA-DRB115:0 DVDLHLKGPVKKI  
HLA-DRB108:0 LPGILYNMKNKQC  
HLA-DRB115:0 WADDIINSSGYRI  
HLA-DQA104:C DLASCDLTSSAAD  
HLA-DQA104:C PYVITSGITEQERC  
HLA-DRB115:0 NERLWAWESWR  
HLA-DQA104:C PLPVTSTSSASSGI  
HLA-DQA101:C PGSEAEGSRLKVC  
HLA-DRB108:0 PSERQLTPLPPSA  
HLA-DRB115:0 SQTDRQDQSYHY  
HLA-A02:01 VLIEFCHLV  
HLA-A02:01 FLLDPVLAGI  
HLA-A02:01 YLTYLLLWV  
HLA-C05:01 LADDHMALV

HLA-A24:02 FYYDYNFISF  
HLA-A02:01 FLQCLGRFV  
HLA-A02:01 SMLEWHLSTHM  
HLA-B44:02 MEFHKLQSAF  
HLA-A02:01 ALLITARCVV  
HLA-B44:02 AEELYKQALEI  
HLA-A02:01 AMARGCFLNA  
HLA-A02:01 MLNPANIRSI  
HLA-A02:01 PMFNPLIYAL  
HLA-B44:02 QEGLCVHVVPF  
HLA-A24:02 KYIGTNAEI  
HLA-A02:01 KLQESGEVQV  
HLA-A02:01 YLTPIKHL  
HLA-A24:02 AYWPDWNRL  
HLA-A24:02 LYPTPRVRAMI  
HLA-C05:01 GSDKSNVGT  
HLA-B44:02 AEFASKPAA  
HLA-C05:01 YLDQFQTK  
HLA-C05:01 SQDVGVVHI  
HLA-B44:02 AELRDTRKHAV  
HLA-A02:01 KLVYHGWTRT  
HLA-C05:01 CGDRTSGYH  
HLA-C05:01 LQDSLDRCY  
HLA-A24:02 KFSKMQAF  
HLA-A02:01 ILLTLTAQEP  
HLA-B44:02 RELCRQDAKGL  
HLA-A02:01 LIFKQVHGFAT  
HLA-A02:01 GLSGGAAPPP  
HLA-A02:01 TVSSGISTA  
HLA-C05:01 LCETHETGT  
HLA-B18:01 TEVNSPPPQ  
HLA-C05:01 AAGHQKAFG  
HLA-B44:02 VEVIKVRNS  
HLA-DQA105:C LAALVAPATAAT/  
HLA-DQA105:C GVGLSGGAAPPP  
HLA-DQA105:C ESSTVSSGISTATM  
HLA-DRB104:0 LDRFCSALSSMLE  
HLA-DQA105:C SPLHSRSIAALADI  
HLA-DRB104:0 FMEFHKLQSAFVI  
HLA-DQA105:C TSNAGSAQRVCS  
HLA-DRB104:0 PANIRISISNMTSQ  
HLA-DRB104:0 ANIRISISNMTSQE  
HLA-DQA105:C GRSTGKGIAEFAS  
HLA-DQA105:C LDPVLAGINSLSSI  
HLA-DRB103:0 NKVILSGLRPFRC  
HLA-DRB103:0 TPIKHLRKSLLIYI  
HLA-DRB104:0 NPLIYALRNTEMK



HLA-DQA105:C NFWMVWSEAM  
HLA-DRB104:0 TQAVLRIKSAAGF  
HLA-DQA105:C YYDYNFISFHEDLQ  
HLA-DRB103:0 YLLLWVKQRRDLI  
HLA-DQA105:C TSKYIGTNAEITYL  
HLA-DRB103:0 RELCRQDAKGLFE  
HLA-DRB104:0 GRKFSKMQAFRII  
HLA-DQA105:C DVEGIGEEVLALLI  
HLA-DRB104:0 GFKLKEVSSVNSP  
HLA-DRB104:0 GSLNILLTLTAQE  
HLA-DRB104:0 LQCLGRFVNTPF  
HLA-DRB104:0 LILIFKQVHGFATM  
HLA-DQA105:C VRNSRSRGGGEG  
HLA-DRB104:0 EVQVHKLQSLKKI  
HLA-DQA105:C LIEFCHLVGDCELS  
HLA-DRB104:0 DFYLDQFQTKENI  
HLA-DRB103:0 LCVVCGDRTSGYI  
HLA-DRB104:0 PRVRAMIESLNQI  
HLA-DQA105:C TRKHAVEVTLDPFI  
HLA-DQA105:C LVIYHGWTRTTKI  
HLA-DQA105:C LVTVQEGLCVHVI  
HLA-DRB103:0 EPEVLQDSLDRCY  
HLA-DRB104:0 ELYKQALEISENAI  
HLA-DQA105:C FAWCRGSDKSNV  
HLA-A02:01 VLIEFCHLV  
HLA-A02:01 NLLSTIPYI  
HLA-C05:01 YTDFDETRV  
HLA-A02:01 VLDELSVTYV  
HLA-A02:01 LLIEAPIRMMI  
HLA-A02:01 FLQCLGRFV  
HLA-A02:01 KMCHDYPQLV  
HLA-A02:01 SILEWEHLDFI  
HLA-A02:01 SMLEWHLSTHM  
HLA-A02:01 IMIPKLCMQL  
HLA-B44:02 AEELYKQALEI  
HLA-C05:01 SVDVVNMF  
HLA-A02:01 TLYAICDV  
HLA-A24:02 KYIGTNAEI  
HLA-A02:01 ALWLQKQQLV  
HLA-A02:01 HMAEKTFLC  
HLA-A02:01 GLTYKFHV  
HLA-A24:02 LYPTPRVRAMI  
HLA-A02:01 PLLPFYELDGA  
HLA-B44:02 AETAKGYLL  
HLA-A02:01 FIKECREDYYL  
HLA-C05:01 YLDQFQTKI  
HLA-C05:01 TSDEKDSVSNT

HLA-C05:01 SQDVGVVHI  
HLA-B44:02 AELRDTRKHAV  
HLA-A02:01 KLVYHGWTRT  
HLA-A24:02 KFSKMQAF  
HLA-C05:01 QVDSCHPQG  
HLA-A02:01 PLGNCPAHL  
HLA-A02:01 ILLTLTAQEP  
HLA-B44:02 RELCRQDAKGL  
HLA-C05:01 PANSPPPPA  
HLA-C05:01 VGNTKPAET  
HLA-DQA105:C FYELDGAPTAQAQ'  
HLA-DRB104:0 LDRFCSALSSMLE  
HLA-DQA105:C MSFWGATVITNL  
HLA-DQA105:C TYKFHVAVSSVL(  
HLA-DRB103:0 RVVLLIEAPIRMM  
HLA-DRB103:0 NKVILSGLRPFRC(  
HLA-DQA105:C GRISAHQGAQVD  
HLA-DRB103:0 IIKMCHDYPQLVL  
HLA-DQA105:C VTYVESFQVIEEC  
HLA-DRB103:0 RLVLSVDVVNMF  
HLA-DQA105:C VFHESILEWEHLD  
HLA-DQA105:C TSKYIGTNAEITYL  
HLA-DRB103:0 RELCRQDAKGLFE  
HLA-DRB103:0 RPTFVKNHRVHM  
HLA-DRB104:0 GRKFSKMQAFRI'  
HLA-DRB104:0 GSLNILLTLTAQE  
HLA-DRB104:0 YYLGRQRSQESYSI  
HLA-DQA105:C LIPIPANSPPPPAL  
HLA-DRB104:0 LQCLGRFVNTPFLL  
HLA-DRB103:0 KDTVYTFDFETR\  
HLA-DRB103:0 LKDTVYTFDFETR  
HLA-DQA105:C PKHQPAETAAG  
HLA-DQA105:C LIEFCHLVGDCELS  
HLA-DQA105:C PLKPVGNTKPAET  
HLA-DRB104:0 DFYLDQFQTKEN'  
HLA-DRB104:0 PRVRAMIESLNQI  
HLA-DQA105:C TRKHAVEVTLDPET  
HLA-DRB104:0 IPKLCMQLTVGSC  
HLA-DQA105:C LVIYHGWTRTTKI  
HLA-DQA105:C HPLPPTS DATSPT  
HLA-DQA105:C TLYAICDVFTQYLI  
HLA-DQA105:C TATEIKEGQQSGT  
HLA-DRB104:0 ELYKQALEISENA'  
HLA-DRB104:0 LNRRYHPALWLQ  
HLA-A23:01 RYFCWYTI  
HLA-A32:01 RILIRFFSL  
HLA-A32:01 RFLFLVPLL

|            |             |
|------------|-------------|
| HLA-B41:02 | AERLLYPL    |
| HLA-A23:01 | FYDNALNASF  |
| HLA-A32:01 | KALSHSSSF   |
| HLA-B41:02 | EEKRVGFSL   |
| HLA-A32:01 | RSSWDYRLYLF |
| HLA-A32:01 | KAFSHSSTL   |
| HLA-A32:01 | RILIRFFLL   |
| HLA-A23:01 | GWSCHNGHYF  |
| HLA-C08:02 | LLDEKGPEV   |
| HLA-A32:01 | IIFVFLVETRF |
| HLA-B41:02 | VERLEKWLQL  |
| HLA-B41:02 | SELHGFEAAVL |
| HLA-A32:01 | KIHKSQFII   |
| HLA-B41:02 | KECGKAFSF   |
| HLA-B41:02 | LEARAYLRI   |
| HLA-B41:02 | QEGLRSVCM   |
| HLA-B41:02 | KETPESLFEL  |
| HLA-A32:01 | STLTTHKI    |
| HLA-A32:01 | HLSPLGRSF   |
| HLA-B41:02 | AERLSSRSKA  |
| HLA-B41:02 | RELLEVVEPEV |
| HLA-B41:02 | LEHAFNNA    |
| HLA-A32:01 | RTKDISPQL   |
| HLA-A32:01 | RSSHLTKHKVI |
| HLA-A32:01 | RGFSCLLLL   |
| HLA-C08:02 | VSSFRGNKI   |
| HLA-B41:02 | LEEGSIDSTL  |
| HLA-B41:02 | VESNSNGAF   |
| HLA-A32:01 | SQYFTSNNY   |
| HLA-C08:02 | DQDPSCPRL   |
| HLA-A32:01 | RITVQFLI    |
| HLA-B41:02 | NESSNLTTHKI |
| HLA-B41:02 | CEECGKAF    |
| HLA-B41:02 | SEDPRFREAV  |
| HLA-B41:02 | GECGKTFRQSA |
| HLA-B41:02 | CEECGKTF    |
| HLA-B14:02 | CQYIRSMAC   |
| HLA-B41:02 | AQLALSFSRL  |
| HLA-B41:02 | IEHKRSHTG   |
| HLA-B41:02 | GEKPYKCEEC  |
| HLA-B41:02 | KQLTLQANV   |
| HLA-B41:02 | GEKPYKCKEC  |
| HLA-B41:02 | GEKPCKCEEC  |
| HLA-C08:02 | RGDSTSSIR   |
| HLA-A32:01 | STLTTHKRI   |
| HLA-C08:02 | CSVKNQTPL   |
| HLA-A32:01 | RIHTGEKPY   |

HLA-C08:02 PITKVGRAL  
HLA-C08:02 QAQTSGRGC  
HLA-A32:01 KVIHTGEKPY  
HLA-B14:02 THKRIHTGE  
HLA-C08:02 ECDKATHTG  
HLA-B41:02 CEECGKAFNQC  
HLA-C08:02 CTPAWTAEI  
HLA-B41:02 TQHKVIHTG  
HLA-B14:02 KHKIIHTGEK  
HLA-B14:02 YKCEECGKAFF  
HLA-B14:02 SKHKIIHTGE  
HLA-DRB101:0 TCQYIRSMARKRLV  
HLA-DRB101:0 ITTLMHLSPLGRSI  
HLA-DRB101:0 LIRFFLLESWQIGK  
HLA-DRB101:0 RITVQFLISLCGVS  
HLA-DRB111:0 REWVIQKIHKSQF  
HLA-DRB111:0 RSICMHTKKRVSS  
HLA-DRB101:0 ECGKTFNHFSALR  
HLA-DRB101:0 FLLFLVPLLWAPA  
HLA-DRB101:0 IVNQAQLALSFSR  
HLA-DRB101:0 ECGKTFRQSANLY  
HLA-DRB101:0 VLEARAYLRILGEE  
HLA-DRB101:0 GKAFKYSSTLTTH  
HLA-DRB111:0 QFSTLKKHKIIHTG  
HLA-DRB111:0 AGPITKVGRALSP  
HLA-DRB101:0 GKAFIWSSTLTTH  
HLA-DRB111:0 IIFVFLVETRFCHV  
HLA-DQA105:C STGLGWGSGLVA  
HLA-DRB101:0 FSLLLLTSEIDLPA  
HLA-DRB111:0 GKALSHSSSFRRH  
HLA-DRB101:0 LSKQLTLQANVSE  
HLA-DRB111:0 GKAFNRSSHHTKFI  
HLA-DRB111:0 PGFKRFSCLSLRSS  
HLA-DRB111:0 RSSVLSKHKIIHTG  
HLA-DRB111:0 TSSIRSTGKLSKAC  
HLA-DRB111:0 FSHSSTLAKHKRII  
HLA-DRB111:0 SVLVERLEKWLQI  
HLA-DRB101:0 GSSFYALEEKRVG  
HLA-DRB111:0 LSAVTATQKKKAE  
HLA-DRB111:0 SILAKHKVIHTGEK  
HLA-DRB111:0 SISSTFTKHKIIHTG  
HLA-DRB101:0 PCSVKNQTPQLQS  
HLA-DRB101:0 AERLLYPLPPSADI  
HLA-DRB101:0 ETPESLFELNSVM  
HLA-DRB111:0 RQEGLRSVCMHT  
HLA-DRB101:0 VLYAVLVHAGWS  
HLA-DRB111:0 SSNLTTHKRIHTG

HLA-DRB101:0 TTFYDNALNASFL  
HLA-DQA105:C PSELHGFEAAVLR  
HLA-DRB101:0 EECGKAFYQSSILS  
HLA-DRB101:0 AFNNARYQLGIEK  
HLA-DRB101:0 LLLLTSEIDLVPKRI  
HLA-DRB111:0 ILTKHKIIHTGEKP  
HLA-DRB111:0 SFPSSVRRHERIH  
HLA-DQA105:C CWYTIIGWGTPT  
HLA-DQA105:C PRFREAVKAASDE  
HLA-DQA105:C SEAGVGVESNSN  
HLA-DRB111:0 NRSSHLTQHKVIF  
HLA-DRB111:0 SSTLNHGKRIHTG  
HLA-DRB111:0 SSSLIEHKRSHTGE  
HLA-DRB101:0 DISPQLNSATIIDI  
HLA-DRB111:0 FTRSSSLIEHKRSH  
HLA-DQA105:C RLSRELLEVVEPE  
HLA-DRB101:0 EECGKAFNQCSN  
HLA-DRB111:0 LTKHKRIHTGEKP  
HLA-DRB101:0 LLLTSEIDLVPKRR  
HLA-DRB111:0 SIRECRRSPSSQYF  
HLA-DRB101:0 PSCPRLSRELLEV  
HLA-DQA105:C CTPAWTAELDSV  
HLA-DRB101:0 SRELLDEKGPEVL  
HLA-DQA105:C VQIIDDEPQAQTS  
HLA-DQA105:C DKATHTGEKPYK  
HLA-A32:01 KTFskVSTL  
HLA-A23:01 FYINERGHIF  
HLA-A23:01 RYFCWYTII  
HLA-A32:01 RLFLLFLVPLL  
HLA-A23:01 FYDNALNASF  
HLA-C08:02 LLDEKGPEV  
HLA-B41:02 VERLEKWLQL  
HLA-C08:02 FQDSHDRCL  
HLA-A32:01 KIHKSQFII  
HLA-B41:02 LEARAYLRI  
HLA-B41:02 HERKCGAVRV  
HLA-B41:02 LERNPMSV  
HLA-A32:01 HLSPLGRSF  
HLA-B41:02 LDRCYSTPF  
HLA-A32:01 KQNFSLKL  
HLA-B41:02 RELLEVVEPEV  
HLA-A32:01 RTKDISPQL  
HLA-B41:02 VESNSNGAF  
HLA-C08:02 WYDKKDNTCPM  
HLA-A32:01 SQYFTSNNY  
HLA-A32:01 KLKSGIRAVVL  
HLA-A32:01 RITVQFLI

HLA-B41:02 CEECGKAF  
HLA-B41:02 SEDPRFREAV  
HLA-A32:01 SMFSILTKHKV  
HLA-B41:02 GEKPYKCEEC  
HLA-A23:01 WWWKMDQPEM  
HLA-B14:02 AHACNPSTL  
HLA-A32:01 KIHTGEKPY  
HLA-C08:02 RGDSTSSIR  
HLA-C08:02 WASQSAGITGV  
HLA-C08:02 CSVKNQTPL  
HLA-C08:02 PITKVGRAL  
HLA-A32:01 KIIHSGEKPY  
HLA-A32:01 KIIHTGEKPY  
HLA-B14:02 SPPPPCCSL  
HLA-B14:02 HKRGKVHNS  
HLA-DRB101:0 ITTLMHLSPLGRS  
HLA-DRB111:0 GFSMFSILTKHKV  
HLA-DRB101:0 VQYGIQRVEAML  
HLA-DRB111:0 HFSALRRHKIIHTC  
HLA-DRB101:0 RITVQFLISLCGVS  
HLA-DRB111:0 REWVIQKIHKSQF  
HLA-DRB101:0 LPFDIMKGLTLER  
HLA-DRB101:0 CCSLLELPPELLVE  
HLA-DRB101:0 FLLFLVPLLWAPA  
HLA-DRB101:0 VLEARAYLRILGEE  
HLA-DRB111:0 LKKQNFSLKLRIYF  
HLA-DRB101:0 FSKVSTLTTHKAIH  
HLA-DRB111:0 AGPITKVGRALSP  
HLA-DRB101:0 KSGIRAVVLPGVS  
HLA-DRB111:0 SAGITGVSHRARL  
HLA-DRB111:0 TSSIRSTGKLSKAC  
HLA-DRB101:0 KKDLLAAVAHACI  
HLA-DRB111:0 SVLVERLEKWLQI  
HLA-DRB101:0 PCSVKNTPLQLS  
HLA-DRB101:0 HQFFLNTTGFSFC  
HLA-DRB111:0 DDNIVHKRGKVH  
HLA-DRB101:0 KDRFYINERGHIF  
HLA-DRB101:0 TTFYDNALNASFL  
HLA-DRB101:0 EECGKAFNQSSTI  
HLA-DQA105:C CWYTIIGWGTP  
HLA-DRB101:0 EWWWKMDQPE  
HLA-DQA105:C PRFREAVKAASDI  
HLA-DQA105:C SEAGVGVESNSN  
HLA-DRB111:0 THKIIHSGEKPYK  
HLA-DRB101:0 DISPQLNSATIIDI  
HLA-DRB111:0 KHEIHTGEKPYK  
HLA-DQA105:C RLSRELLEVVPEA

HLA-DRB111:0 TLTHKKIHTGEKI  
HLA-DQA105:C CYSTPFYELELPDL  
HLA-DRB111:0 SIRECRRSPSSQYF  
HLA-DQA105:C PMFVYGGCQGN  
HLA-DRB101:0 SRELLDEKGPEVL  
HLA-A32:01 KILHLPTF  
HLA-A32:01 KLLKNFAF  
HLA-A23:01 IYLSLLLLLI  
HLA-A23:01 RYFCWYTII  
HLA-B41:02 HEFVGPPSL  
HLA-A32:01 KSLRLKINLII  
HLA-C08:02 AADVIQQGI  
HLA-A23:01 TYVALMSFI  
HLA-A23:01 IFAINNTKF  
HLA-B41:02 HESLYNPEI  
HLA-A23:01 AYSVDKLLF  
HLA-B41:02 REINRKTPV  
HLA-B41:02 IELRDNTSI  
HLA-A32:01 KIHKSQFII  
HLA-B41:02 LEARAYLRI  
HLA-B41:02 SEVLGRPTSL  
HLA-B41:02 SEYFLLNPYL  
HLA-A32:01 KLQQENSIF  
HLA-B41:02 NEDKFSLML  
HLA-B41:02 QEAEVAVSA  
HLA-C08:02 QADNIIRHV  
HLA-A32:01 VLFSSHHAL  
HLA-A32:01 KNMLTSLGASF  
HLA-C08:02 KCDECGKVF  
HLA-B41:02 SEGCTPLMHVV  
HLA-C08:02 TTDAPVCSG  
HLA-B41:02 VESNSNGAF  
HLA-A32:01 KNLVGVTI  
HLA-B41:02 CQGVSHQAV  
HLA-B41:02 DENALCFNTVV  
HLA-B41:02 PEGLLPHPAL  
HLA-A32:01 NLYGTVQPHTL  
HLA-A23:01 MFSPNHII  
HLA-B41:02 HESNMLLKC  
HLA-C08:02 RGDSTSSIR  
HLA-A23:01 LPLSYPPPQF  
HLA-C08:02 PITKVGRAL  
HLA-A32:01 MLNRKASRNAY  
HLA-B41:02 AQLREGCRARF  
HLA-B41:02 KEHQQQQQ  
HLA-DRB101:0 DAKILHLPAYSVD  
HLA-DRB101:0 AWSLLLLSSAQLR

HLA-DRB101:0 LLKNFAMKSYILI  
HLA-DRB101:0 KNMLTSLGASFTY  
HLA-DRB111:0 LRLKINLIHQRNH  
HLA-DRB101:0 LNPYLSALSSSSKE  
HLA-DRB101:0 QVLVLKSKNLVGV  
HLA-DRB101:0 FRSTILHESNMLLI  
HLA-DRB111:0 REWVIQKIHKSQF  
HLA-DRB101:0 VLILERPLLIETYVA  
HLA-DRB101:0 HHALVQWKPPAI  
HLA-DRB101:0 DNIIRHVLNITKD  
HLA-DRB101:0 VLEARAYLRILGEE  
HLA-DRB101:0 AAVIGLTKSVAAD  
HLA-DRB101:0 FPHLQGVQIYLSL  
HLA-DRB101:0 CTPLMHVVSGRG  
HLA-DRB101:0 DDEFIAINNTKFSY  
HLA-DRB111:0 AGPITKVGRALSP  
HLA-DRB101:0 AHALFYTLPEGLLI  
HLA-DRB111:0 APLIRRQLSHDHE  
HLA-DRB101:0 VNLYGTVQPHTLI  
HLA-DRB101:0 SYPPPQFAHALLA  
HLA-DRB111:0 TSSIRSTGKLSKAC  
HLA-DRB101:0 DKFSLMLPGWDL  
HLA-DRB111:0 IFYDLVREINRKTP  
HLA-DQA105:C QGVSHQAVAEAL  
HLA-DRB101:0 NTSIRWDTAMTV  
HLA-DRB101:0 DQFYSEVLGRPTS  
HLA-DRB101:0 CSGLWLCQPTPR  
HLA-DQA105:C EVDMQEAEVAVS  
HLA-DRB101:0 FSPNHIIVTEFILLC  
HLA-DRB101:0 GKVFNWWSQLT  
HLA-DRB101:0 ENSIFRNEITTLNE  
HLA-DRB111:0 MLNRKASRNAYY  
HLA-DRB101:0 ALCFNTVVGHNC  
HLA-DQA105:C CWYTIIGWGTPT  
HLA-DRB101:0 ESLYNPEIASCIQV  
HLA-DQA105:C SEAGVGVESNSN  
HLA-DRB111:0 KLTRARDKEHQQ  
HLA-A23:01 RYFCWYTII  
HLA-A32:01 RLFLFLVPLL  
HLA-A23:01 FYDNALNASF  
HLA-A23:01 VYWWGLSPAL  
HLA-B41:02 IERMVRWRI  
HLA-A23:01 VHLRKSGYVF  
HLA-B41:02 VERLEKWLQL  
HLA-A32:01 KIHKSQFII  
HLA-B41:02 LEARAYLRI  
HLA-C08:02 KADKVLQSFL



HLA-A32:01 HLSPLGRSF  
HLA-C08:02 VLDQNNNAPEI  
HLA-A32:01 RTKDISPQL  
HLA-B41:02 VESNSNGAF  
HLA-A32:01 SQYFTSNNY  
HLA-B41:02 SQRSHLAA  
HLA-A32:01 RITVQFLI  
HLA-B41:02 SEDPRFREAV  
HLA-C08:02 HSSTHPGEV  
HLA-B41:02 AEIPEEPA  
HLA-C08:02 ILDRRSGRQI  
HLA-A32:01 VLIQPSNRRAF  
HLA-A32:01 KASANDQMF  
HLA-C08:02 RGDSTSSIR  
HLA-C08:02 CSVKNQTPL  
HLA-C08:02 TSSSSQSET  
HLA-C08:02 STDSLKARG  
HLA-C08:02 PITKVGRAL  
HLA-B41:02 PEGTSRTV  
HLA-A23:01 LYLRPPQPP  
HLA-DRB101:0 ITTLMHLSPLGRS  
HLA-DRB111:0 TVSLIYAVHLRKSC  
HLA-DRB111:0 KKEYIERMVRWR  
HLA-DRB101:0 GYKVLIQPSNRR  
HLA-DRB101:0 RITVQFLISLCGVS  
HLA-DRB111:0 REWVIQKIHKSQF  
HLA-DRB101:0 FLLFLVPLLWAPA  
HLA-DRB101:0 VLEARAYLRILGEE  
HLA-DRB111:0 GAVNYKLVHSS  
HLA-DRB101:0 KVLQSFLQSQVVI  
HLA-DRB111:0 AGPITKVGRALSP  
HLA-DRB101:0 SVYWWGLSPALC  
HLA-DRB101:0 RRGLLYLRPPQPP  
HLA-DRB101:0 CGKAFSQRSHLA/  
HLA-DRB111:0 TSSIRSTGKLSKAC  
HLA-DRB111:0 QRRSVILDRRSGR  
HLA-DRB111:0 SVLVERLEKWLQI  
HLA-DRB101:0 PCSVKNTPLQLS  
HLA-DRB101:0 TTFYDNALNASFL  
HLA-DQA105:C CWYTIIGWGTP  
HLA-DRB101:0 STDSLKARGAPRC  
HLA-DQA105:C PRFREAVKAASDE  
HLA-DRB101:0 LSLFVLDQNNNAI  
HLA-DQA105:C SEAGVGVESNSN/  
HLA-DQA105:C ANTVWTEASQSA  
HLA-DRB101:0 DISPQLNSATIIDIH  
HLA-DQA105:C TSSSSQSETSSAVS

HLA-DQA105:C WVEGNGVLSLPE  
HLA-DRB111:0 SIRECRRSPSSQYF  
HLA-DQA105:C TKESSTKASANDC  
HLA-C07:02 FYYAYVFEL  
HLA-B07:02 RPPFSAAKSL  
HLA-A03:01 KIHTRGKPYK  
HLA-B07:02 TPAERLLTPL  
HLA-C07:02 YRHAPHPANF  
HLA-A03:01 IIHTGKKPYK  
HLA-B07:02 SPRLECSGAI  
HLA-A03:01 RIHTGEKPYK  
HLA-B35:01 HSHSRTPEY  
HLA-A03:01 KLAFQKDTMK  
HLA-A03:01 KIHTGEKPYK  
HLA-A03:01 KTKRVSSQK  
HLA-A03:01 IIHTGEKPYK  
HLA-A03:01 IIHTREKPYK  
HLA-B07:02 TPSECQLTPL  
HLA-A03:01 IIHTVEKPYK  
HLA-B07:02 TPPECVLTPL  
HLA-A03:01 LLFLWRSFR  
HLA-C07:02 FYNFLVVL  
HLA-B35:01 VPLGTGTSIF  
HLA-B35:01 FVEPSLVFAY  
HLA-B07:02 RPQGGNQSQ  
HLA-A03:01 VIHTGEKPYK  
HLA-B07:02 WPLKVLGLQEM  
HLA-A03:01 KSYKCEECGK  
HLA-A03:01 TIHTGEKPYK  
HLA-A03:01 VSSRKQPALK  
HLA-A03:26 KAFNQSSTLTK  
HLA-B07:02 RPEPPDTGV  
HLA-B07:02 TPRARGVPPTV  
HLA-B35:01 HQIIHTGEKPY  
HLA-B07:02 SPSSSSPST  
HLA-A03:01 IIHTEEKPYK  
HLA-B07:02 SPSELQTAGPV  
HLA-C07:02 ARTECPPHL  
HLA-B07:02 EPWNMKRHEM  
HLA-B07:02 TPLHVTSTSSA  
HLA-A03:01 RGYNGLNQCLK  
HLA-A03:26 KAFNQSSHLTR  
HLA-C07:02 TRLVQVVL  
HLA-C07:02 CRSSRASHF  
HLA-A03:26 AQAGVWWHK  
HLA-A03:26 KTIHTGEK  
HLA-A03:01 IVHTEEKLNK

|            |              |
|------------|--------------|
| HLA-C07:02 | HHVDAHATL    |
| HLA-B07:02 | GPEYTGPCL    |
| HLA-A03:26 | STHKIIHTGEK  |
| HLA-C07:02 | WLTPVIPAL    |
| HLA-A03:26 | VVLFFLWRSFR  |
| HLA-B07:02 | LPTSASQSARI  |
| HLA-B07:02 | TPSGGTAQT    |
| HLA-B35:01 | LPSADDNIK    |
| HLA-A03:26 | KIHYESVK     |
| HLA-A03:26 | TTHKIIHTGEK  |
| HLA-B35:01 | APQESWDEGY   |
| HLA-B07:02 | HPHPPPHPP    |
| HLA-A03:26 | TVHKIIHTGEK  |
| HLA-B07:02 | KTFRHNSAL    |
| HLA-B35:01 | FGGANGSLF    |
| HLA-B07:02 | KAFKYFSSL    |
| HLA-A03:01 | KFSSLTQHK    |
| HLA-B07:02 | QPGGSLRL     |
| HLA-A03:26 | SSHKRIHTGEK  |
| HLA-A03:26 | TTHKKIHTGEK  |
| HLA-A03:01 | SQSSTLRKHK   |
| HLA-A03:26 | GVRDQPGQH GK |
| HLA-A03:01 | FILEVSETK    |
| HLA-A03:26 | KIREQEEK     |
| HLA-A03:01 | HTGEKPYKCK   |
| HLA-A03:01 | HLTTHKIIH    |
| HLA-B07:02 | APELDEHL     |
| HLA-B07:02 | RPYKCEECGKA  |
| HLA-C07:02 | SRSQGSSRG    |
| HLA-C07:02 | IHTGEKPYN    |
| HLA-B07:02 | KPYKCKECGKA  |
| HLA-B07:02 | KPYKCEECGKV  |
| HLA-C07:02 | VRAQAKKFS    |
| HLA-A03:26 | TQHRRIHTGEK  |
| HLA-B35:01 | DVDAYS LQL   |
| HLA-B07:02 | KPYKCEDCGKA  |
| HLA-A03:01 | TLNKHKRIH    |
| HLA-C07:02 | SYHKKIHTG    |
| HLA-B07:02 | KPYKCEECGKA  |
| HLA-C07:02 | YKCEECGKTF   |
| HLA-C07:02 | YKCEECDKA    |
| HLA-C07:02 | GKKPYKCEE    |
| HLA-C07:02 | VSICGIQDE    |
| HLA-A03:01 | KKHKIIHTGEK  |
| HLA-A03:01 | STDLTTHKIIH  |
| HLA-A03:01 | IEHKKIHTGEK  |
| HLA-A03:01 | KCEECGKAFNR  |

HLA-B07:02 KCEECGKAFNQ  
HLA-A03:01 KHKVIHTGEKP  
HLA-DRB115:0 LLFLWRSFRSVRS  
HLA-DRB115:0 KAFKYFSSLTTHKI  
HLA-DRB115:0 VIVLVVLWFYAY  
HLA-DQA101:C TFRHNSALVIHKA  
HLA-DRB113:0 AQAIIPSWPLKVL  
HLA-DQA101:C LRVNGSCSVAQA  
HLA-DRB113:0 LSRLMLS NRPPFS  
HLA-DRB115:0 NLSNKAFYNFLVV  
HLA-DRB113:0 NLFRLRRSLALSPF  
HLA-DQA101:C SPSILAAKLAFAQKI  
HLA-DQA101:C KECGKAFMWISA  
HLA-DRB115:0 QSSHLTRHKSIIHT  
HLA-DQA101:C LTVRVHGFIVLSI  
HLA-DRB115:0 KAFKYSSTLSSHKF  
HLA-DQA101:C QPGGSLRLSCAA  
HLA-DQA101:C VFTTKAFVEPSLVI  
HLA-DQA101:C WIMPISVALSTFG  
HLA-DQA101:C PSELQTAGPVATI  
HLA-DQA101:C TSASQSARITGVS  
HLA-DRB113:0 QSSILTKHKIIHTV  
HLA-DQA101:C LKGLDTRLVQV  
HLA-DRB113:0 NSQLVRHQIIHTG  
HLA-DQA101:C PWLTPVIPALWE  
HLA-DRB115:0 NQSYQLTRHKIV  
HLA-DRB115:0 GKAFNKFSSLTQF  
HLA-DRB113:0 KIHYESVKVNTYS  
HLA-DQA101:C SASTGHATPLHV  
HLA-DRB113:0 FHQSSILTKHKIIH  
HLA-DRB115:0 KTTQSKIFQCGKY  
HLA-DQA101:C IKEKTVVSICGIQD  
HLA-DQA101:C VPLGTGTSIFSKQ  
HLA-DRB113:0 KAQRQSATLNKHI  
HLA-DRB113:0 WLSKLTVHKIIHT  
HLA-DQA101:C FSKASTLTAHKTI  
HLA-DRB115:0 KWSSTLSYHKKIH  
HLA-DRB113:0 KHKIIHTGKKPYK  
HLA-DRB113:0 TGNIAKDVDAYS  
HLA-DRB115:0 KSSTLTYHKVIHT  
HLA-DQA101:C ECGKAFNQSAHL  
HLA-DQA101:C FKRSSALSTHKIIH  
HLA-DRB115:0 FSQSSTLRKHKIIH  
HLA-DRB115:0 QFSTLKKHKIIHT  
HLA-DQA101:C EGYWTLSIPPDM  
HLA-DRB113:0 KHEIIHTGKKPYK  
HLA-DRB113:0 NIFKQLSDLTKHK

HLA-DQA101:C CHTKIHVDAHA`  
HLA-DRB113:0 ECGKAFNRSSNLI  
HLA-DRB115:0 SSNLIEHKKIHTGE  
HLA-DRB113:0 QTGCRSSRASHFC  
HLA-DRB115:0 EECGKVFNWWSI  
HLA-DQA101:C CEECGKAFNISSH  
HLA-DRB113:0 NRSSHLTQHKIIH`  
HLA-DQA101:C ECQLTPLPPSALP!  
HLA-DRB115:0 PEYYPNAGLIKNY  
HLA-DRB113:0 SILTKHKVIHTGEK  
HLA-DRB115:0 SSTLTKHKKIHTRE  
HLA-DQA101:C FNESSNLTHKIIH  
HLA-DRB113:0 FNQSSHLTTHKIIH  
HLA-DQA101:C CEECGKAFRQSLT  
HLA-DQA101:C KCEVCGKAFRQS/  
HLA-DQA101:C KRVSSRKQPALK/  
HLA-DQA101:C WNMKRHEMVAI  
HLA-DQA101:C RSTDLTTHKIIHTC  
HLA-DQA101:C EECGKAFGRSRVI  
HLA-DRB113:0 YEKRVRAQAKKF!  
HLA-DQA101:C LDEHLVERATQES  
HLA-DQA101:C GEQHGSSSGLSS  
HLA-DQA101:C NIKTPAECLLPLP  
HLA-DRB115:0 LNKHKTIHTGEKP  
HLA-DQA101:C RETDFGVGVRDC  
HLA-DRB113:0 HKIIHTGEKPYKCI  
HLA-DQA101:C PPECVLTPLPPSAI  
HLA-DRB113:0 SLTKHKVIHTGEK  
HLA-DRB115:0 SSNLTHKKIHTG  
HLA-DQA101:C KCEECGKAFNQF!  
HLA-DRB115:0 LTRHKRIHTGEKP  
HLA-DQA101:C NCEECGKAATRSS  
HLA-DRB113:0 EHKVIHTGEKPYK  
HLA-DRB115:0 VTTHKKIHRGKP  
HLA-DQA101:C LLTPRARGVPPTV  
HLA-DRB115:0 SSWDYRHAPPHF  
HLA-DQA101:C PAAPCLPPLAHHF  
HLA-DQA101:C ECPPHLAVGDWS  
HLA-DQA101:C PPKTRGSHLRPEP  
HLA-DQA101:C PGMGTSTSHQPT  
HLA-DRB115:0 DVEQKLGPEYTG  
HLA-DQA101:C EKPYKCEECGKVF  
HLA-DQA101:C PSSSPSTSSPSSS  
HLA-DRB113:0 EKVWRQEEKIRE(  
HLA-DQA101:C RRPQGGNQSQG  
HLA-C07:02 FYYAYVFEL  
HLA-B35:01 TPEATQPIY

HLA-A03:01 ILSGGVFSK  
HLA-A03:01 RIYIRHTLR  
HLA-B35:01 CFVDDTNVY  
HLA-C07:02 RYQSLNYLL  
HLA-C07:02 FYNFLVVL  
HLA-A03:01 GVNSLFRRK  
HLA-B07:02 LPAYSVDKL  
HLA-B07:02 SPSELQTAGPV  
HLA-A03:26 STFGDSVK  
HLA-B07:02 DPDVARNPV  
HLA-B35:01 HANWLGDP  
HLA-B07:02 GPEYTGPC  
HLA-C07:02 SRIQNIIEI  
HLA-C07:02 VRTEGEHFPL  
HLA-C07:02 FWRGNLATV  
HLA-A03:26 SSLFSTTR  
HLA-B35:01 QVLLGFLF  
HLA-DRB115:0 DAKILHLPAYSVD  
HLA-DRB113:0 LARIYIRHTLRNFII  
HLA-DRB115:0 VIVLVVLWFYYAY  
HLA-DRB115:0 LATVIRYFPTQALI  
HLA-DRB113:0 FNNILSNLGQVLL  
HLA-DRB113:0 VECLVSRKAMMI  
HLA-DRB115:0 NLSNKAFYNFLVV  
HLA-DRB115:0 FMLRLYSQKESC  
HLA-DRB115:0 RRRYQSLNYLLNC  
HLA-DQA101:C PSELQTAGPVATI  
HLA-DQA101:C INTTIGSVTAQDP  
HLA-DRB113:0 IICFVDDTNVYRV  
HLA-DQA101:C KIASRIQNIIEINIS  
HLA-DRB115:0 HLGVNSLFRRKAI  
HLA-DRB115:0 SVKLWVTFHEPW  
HLA-DQA101:C YQVEETSTYALSFI  
HLA-DRB115:0 RETSLYFHSYDYSQ  
HLA-DRB115:0 EHFPLHSPTFSWF  
HLA-DRB115:0 DVEQKLGPEYGTGI  
HLA-C07:02 FYYAYVFEL  
HLA-B35:01 TPEATQPIY  
HLA-A03:01 RIHTGERPYK  
HLA-A03:01 RIHTGEKPYK  
HLA-A03:01 KIHTGEKPYK  
HLA-C07:02 SRVPRTVL  
HLA-C07:02 TRSPPMASL  
HLA-A03:01 IIHTGEKPYK  
HLA-C07:02 YRSAFYAL  
HLA-B35:01 LPTFSVDKLLF  
HLA-C07:02 RYQSLNYLL

HLA-C07:02 FYNFLVVL  
HLA-C07:02 FRQGLALSPRL  
HLA-B35:01 VPLGTGTSIF  
HLA-A03:01 VIHTGEKPYK  
HLA-A03:01 KSYKCEECGK  
HLA-A03:01 TIHTGEKPYK  
HLA-B07:02 LPAYSVDKL  
HLA-B07:02 TPRARGVPPTV  
HLA-B35:01 HQIIHTGEKPY  
HLA-B07:02 SPSELQTAGPV  
HLA-A03:26 STFGDSVK  
HLA-B35:01 HANWLGDP  
HLA-B07:02 APSGTLRASS  
HLA-B35:01 IIHTGEKPY  
HLA-C07:02 YRCEECGKAF  
HLA-C07:02 SRIQNIIEI  
HLA-B07:02 HPLHAGRGGSC  
HLA-C07:02 VRTEGEHFPL  
HLA-A03:26 TTHKIIHTGEK  
HLA-A03:26 TTHKRIHTGEK  
HLA-A03:26 SSLFSTTR  
HLA-B35:01 YTCEECGKVF  
HLA-B35:01 HACNPSTL  
HLA-B35:01 YQCEECGKAF  
HLA-B07:02 KPYKCEECGKV  
HLA-B35:01 KCEECGKAF  
HLA-A03:01 KCEECGKAFK  
HLA-B35:01 CEECGKAFNWF  
HLA-C04:01 KCEECGKAFSW  
HLA-B07:02 KCEECGKAFNQ  
HLA-DRB115:0 DAKILHLPAYSVD  
HLA-DRB115:0 VIVLVVWLFYYAY  
HLA-DRB115:0 IFFFFRQGLALSPF  
HLA-DRB115:0 NLSNKAFYNFLVV  
HLA-DRB115:0 FMLRLYLSQKESC  
HLA-DRB115:0 RRRYQSLNYLLNC  
HLA-DRB113:0 RASLTRSPPMASI  
HLA-DQA101:C PSELQTAGPVATI  
HLA-DQA101:C FYALEQQRVGLA'  
HLA-DQA101:C KIASRIQNIIEINIS  
HLA-DRB113:0 RCQLTATSTSRVP  
HLA-DQA101:C YSCSLTAHKIIHTG  
HLA-DQA101:C VPLGTGTSIFSKQ'  
HLA-DRB113:0 HFSALRKHKVIHT  
HLA-DRB115:0 GKAFNVSSHLTTF  
HLA-DRB115:0 CGKVFSTRSTLTNY  
HLA-DRB115:0 SVKLWVTFHEPW

HLA-DQA101:C YQVEETSTYALSFI  
HLA-DQA101:C KCEECGKAFSWS,  
HLA-DRB115:0 CGKAFNRSSHLTT  
HLA-DRB113:0 HFSALRKHQIIHTC  
HLA-DQA101:C AAPSGTLRASSGA  
HLA-DRB115:0 EECGKAFNWFSY  
HLA-DRB115:0 GKAFNRSSHLTTF  
HLA-DQA101:C GKFRPGAVAHAC  
HLA-DRB113:0 YSSDVIQHRRRIHTC  
HLA-DRB115:0 RETSLYFHSDYSQ  
HLA-DQA101:C KSFSQSSTLTTHKI  
HLA-DQA101:C CEECGKAFRQSLT  
HLA-DRB113:0 HKIIHSGEKSYKCE  
HLA-DRB115:0 FSTLTTHKKIHTGEI  
HLA-DQA101:C ECGKAFNQSSNL  
HLA-DRB115:0 LNKHKTIHTGEKP  
HLA-DRB115:0 EHFPLHSPTFSWF  
HLA-DRB113:0 SLTKHKVIHTGEK  
HLA-DRB115:0 EECGKAFKRSSNL  
HLA-DRB113:0 SSALTNHKRIHTG  
HLA-DQA101:C KCEECGKAFNQF!  
HLA-DRB113:0 QRNQVRKHPLHA  
HLA-DQA101:C LLTPRARGVPPTV  
HLA-C07:02 FYYAYVFEL  
HLA-B07:02 LPRASRRTL  
HLA-B35:01 TPEATQPIY  
HLA-C07:02 TRSPPMASL  
HLA-C07:02 RYQSLNYLL  
HLA-C07:02 FYNFLVVL  
HLA-B35:01 VPLGTGTSIF  
HLA-B07:02 SPSELQTAGPV  
HLA-A03:26 STFGDSVK  
HLA-B07:02 DPDVARNPV  
HLA-C07:02 SRIQNIIEI  
HLA-C07:02 VJVADGLTL  
HLA-C07:02 VRTEGEHFPL  
HLA-A03:01 CSGAISAHCK  
HLA-B35:01 QVLLGFLF  
HLA-DRB115:0 VIVLVVLWFYYAY  
HLA-DRB113:0 FNNILSNLGQVLL  
HLA-DRB115:0 NLSNKAFYNFLVV  
HLA-DRB115:0 AISAHCKLRLIHIL  
HLA-DRB115:0 RRRYQSLNYLLNC  
HLA-DRB113:0 RASLTRSPPMASL  
HLA-DQA101:C PSELQTAGPVATI  
HLA-DQA101:C INTTIGSVTAQDP  
HLA-DQA101:C KIASRIQNIIEINIS



HLA-DRB115:0 GAVFVVFVADGL'  
HLA-DQA101:C VPLGTGTSIFSKQ'  
HLA-DRB115:0 SVKLWVTFHEPW  
HLA-DQA101:C YQVEETSTYALSFI  
HLA-DRB113:0 MASLRRTPSRASFI  
HLA-DRB115:0 EHFPLHSPTFSWF  
HLA-B07:02 RPRWADHEV  
HLA-B35:01 WIMHCTLVY  
HLA-C07:02 FYYAYVFEL  
HLA-B35:01 TPEATQPIY  
HLA-A03:01 IIHTGEKPYK  
HLA-C07:02 RYQSLNYLL  
HLA-C07:02 FYNFLVVL  
HLA-C07:02 VRWRDLGSL  
HLA-C07:02 HRSRCKALL  
HLA-B07:02 TPRARGVPPTV  
HLA-B07:02 SPSELQTAGPV  
HLA-A03:26 STFGDSVK  
HLA-B07:02 DPDVARNPV  
HLA-B07:02 GPEYTGPCPL  
HLA-C07:02 SRIQNIIEI  
HLA-C07:02 VRTEGEHFPL  
HLA-B35:01 CWSKCGFPF  
HLA-B35:01 SPDLLDDPDNY  
HLA-B35:01 QVLLGFLF  
HLA-DRB115:0 VIVLVVLWFYYAY  
HLA-DRB113:0 FNNILSNLGQVLL  
HLA-DRB115:0 NLSNKAFYNFLVV  
HLA-DRB115:0 RRRYQSLNYLLNC  
HLA-DRB115:0 FIITRLVILPFWIM  
HLA-DQA101:C PSELQTAGPVATI  
HLA-DQA101:C INTTIGSVTAQDP  
HLA-DQA101:C KIASRIQNIIEINIS  
HLA-DRB115:0 LSLMTLTLFSPDLI  
HLA-DQA101:C MESRSGIQAGVR  
HLA-DRB115:0 SVKLWVTFHEPW  
HLA-DQA101:C YQVEETSTYALSFI  
HLA-DRB113:0 DSGPSIHRSRCKA  
HLA-DRB115:0 QFSTLKKHKIIHTC  
HLA-DRB115:0 EHFPLHSPTFSWF  
HLA-DQA101:C MGRGLLCWSKCC  
HLA-DQA101:C LLTPRARGVPPTV  
HLA-DRB115:0 KWPHSLRRPRW/  
HLA-DRB115:0 DVEQKLGPEYTG  
HLA-B15:01 TSMDPIAAF  
HLA-A02:05 VMATVTAL  
HLA-B15:01 LSMELREF

HLA-C06:02 SRMKVLRFI  
HLA-A02:05 LLAVYCMHSA  
HLA-B15:01 SLTSHIPF  
HLA-A02:05 LMAMENEEMSL  
HLA-A02:05 ILWGRDPITGV  
HLA-A26:01 YVTELIAM  
HLA-A02:05 LLAKGLDSCI  
HLA-A02:05 NMVVIHSHL  
HLA-A02:05 LLLGSADLGI  
HLA-C06:02 GRGKGISTI  
HLA-A02:05 HQSGKVQDNI  
HLA-A26:01 DIYRNGGDF  
HLA-A02:05 AIPRTEFPEA  
HLA-DRB111:0 EEIVMATVTALRF  
HLA-DRB111:0 HIPFKLVSTFKNYY  
HLA-DRB111:0 SYHETSRMKVLRFI  
HLA-DRB111:0 LGNMVVIHSHLW  
HLA-DRB111:0 TELIAMSFPSSGF  
HLA-DRB111:0 LHAVRIDRICSLM  
HLA-DRB111:0 LNGYIYLWGRDP  
HLA-DRB107:0 DLGICLHTSSSGLI  
HLA-DRB111:0 KCDLHLLAKGLDS  
HLA-DRB107:0 DEKCCFWVHQSC  
HLA-DRB111:0 AVYCMHSAEGRK  
HLA-DRB111:0 GKGISTITGHRGK  
HLA-DQA105:C FAPDSSAFPPAIFI  
HLA-DRB111:0 VDLLSMELREFFR  
HLA-DQA105:C VDVTSMDPIAAFI  
HLA-DRB111:0 SIGIQMPVGHIDI  
HLA-C07:01 FRQTAGKVL  
HLA-C07:01 FHNEAWNTL  
HLA-C07:01 SRSGGDRSP  
HLA-A11:01 LAARARLDSK  
HLA-C07:01 DVFQNLSHL  
HLA-C07:01 YAGYIPPSQ  
HLA-DRB110:0 TLPFLRQTAGKVL  
HLA-DRB110:0 GSYQFSMVAGSR  
HLA-DRB115:0 SESFCLAARARLD  
HLA-DRB110:0 VFQNLSHLPTFSS  
HLA-DRB115:0 CSFVLAYAGYIPPSQ  
HLA-DRB110:0 WNTLLRTVYSVIN  
HLA-A02:01 FMTMIVSLAV  
HLA-B07:02 KPRCWEASV  
HLA-A02:01 VMFCLECAL  
HLA-A02:01 FLQAMDSFL  
HLA-A02:01 LMHQGLPTL  
HLA-A02:01 FLSLALSPRL

HLA-B07:02 KPGAVAEVL  
HLA-A02:01 ALHLMPPPF  
HLA-C07:01 TRIQDLNHI  
HLA-C07:01 IRLTTRPKV  
HLA-B07:02 RPRLVPDRT  
HLA-C07:01 MRSCGRGGF  
HLA-A02:01 GMFEGCTTDCP  
HLA-A02:01 KYSNCAWEV  
HLA-C07:01 GHENAIRDY  
HLA-A02:01 KLTKTQGNV  
HLA-B07:02 KPVGKYHIQA  
HLA-A01:01 STQGHASTSSY  
HLA-B07:02 DPGKASKAAWI  
HLA-A02:01 SQISSWEKL  
HLA-C07:01 ERNQKTDGS  
HLA-C07:01 FNWNNQRCK  
HLA-A02:01 SGYGVVGLQSI  
HLA-DRB113:0 ASKAAWIRKIKGL  
HLA-DRB115:0 CLVAFFVLQRKPR  
HLA-DRB115:0 QELFSLALSPRLE  
HLA-DRB113:0 LSMVVQENENV  
HLA-DRB115:0 QQALHLMPPPF  
HLA-DQA101:C NCVELQASAAFN  
HLA-DRB115:0 PKMYFMTMIVSL  
HLA-DRB115:0 EFIFLQAMDSFLR  
HLA-DQA101:C TTEVGLAFARLEE  
HLA-DQA101:C NCAWEVVRMEI  
HLA-DRB113:0 NVTIQCDSGYGV  
HLA-DQA101:C QIENLQATLGSQI  
HLA-DQA101:C TKTQGNVFATDA  
HLA-DRB115:0 DKELLAYAKPGAV  
HLA-DRB115:0 CGRGFQFVSSSLP  
HLA-DRB115:0 DCPSLLPILEPKYA  
HLA-DRB113:0 MAAIRLTTRPKVF  
HLA-DRB115:0 KEQLMHQGLPTL  
HLA-DRB113:0 KTRIQLNHIFPLS  
HLA-DQA101:C KYHIQACTTTPCN  
HLA-DQA101:C YINSTGSTQGHAS  
HLA-DRB115:0 AISAKIRKKGKIER  
HLA-DQA101:C ERGGESTRPRLVF  
HLA-A02:01 GMMQFIDIL  
HLA-C07:01 ARNATCTHYM  
HLA-C07:01 DREHHTTIV  
HLA-C07:01 IHDQSLILL  
HLA-A24:02 VYCCSASTRL  
HLA-C07:01 SYEDCASRI  
HLA-C07:01 SRALPATPHL

HLA-A02:01 KMISNCQMQT  
HLA-B08:01 NANVKRCL  
HLA-C07:01 TRAEAAATA  
HLA-C07:01 GREAKHCDP  
HLA-C07:01 PAEEAPSEV  
HLA-B08:01 QPPCHWLRQL  
HLA-C07:01 QSAVPLDGE  
HLA-DQA105:C YTTTRAEAAATAAC  
HLA-DRB113:0 YRFDLNRSLGIAV  
HLA-DRB113:0 PCHWLRQLSRRG  
HLA-DRB113:0 MQFIDILQNLKRS  
HLA-DRB113:0 REHHTTIVATRHY  
HLA-DQA105:C SRNGSTSRALPAT  
HLA-DRB113:0 TSWTFSWVPGM  
HLA-DRB113:0 HYMQLVWATSSC  
HLA-DQA105:C DGETHAGEDVAV  
HLA-DQA105:C LKPVNASNANVK  
HLA-DRB113:0 ASRIMEDSAIKCE  
HLA-DRB113:0 HDQSLILLNNVVL  
HLA-DQA105:C SEVQPPPAEEAP/  
HLA-DQA105:C ENGDEAGEGREA  
HLA-A03:01 RLNPGLRRK  
HLA-A03:01 RVRPMNHREK  
HLA-A03:01 IAMSTLVWTK  
HLA-A30:02 SNYTISPSAY  
HLA-A30:02 TTPLPVTDTY  
HLA-A03:01 WLDDISCSGK  
HLA-A30:02 HASPSPSPVGY  
HLA-C07:01 LRICTDLFRLV  
HLA-A30:02 KSLPCSAST  
HLA-B44:03 QENVDIATVH  
HLA-B18:01 HQLGNTAHPVF  
HLA-DQA101:C FAMFGTGIAMST  
HLA-DRB110:0 RRQFLRICTDLFRI  
HLA-DRB110:0 LSNYTISPSAYFHII  
HLA-DRB110:0 LMQLYSARQRRR  
HLA-DQA101:C IQENVDIATVHQI  
HLA-DQA101:C QLGNTAHPVFPA  
HLA-DQA101:C MASVKVAVRVRF  
HLA-DRB110:0 PASYHPTPSPMA'  
HLA-DQA101:C YSASTGHATPLPV  
HLA-DQA101:C EESTGPIWLDDIS  
HLA-DQA101:C QQETNKSLPCSAS

### Transcript Name

NM\_001173984,NM\_013263,NM\_001173984,NM\_013263  
NM\_000721,NM\_001205293,NM\_001205294,NM\_000721,NM\_001205293,NM\_001205294  
NM\_001309434,NM\_003134,NM\_001309434,NM\_003134  
NM\_001289000,NM\_001289001,NM\_153609,NM\_001289000,NM\_001289001,NM\_153609  
NM\_001127892,NM\_002968,NM\_001127892,NM\_002968  
NM\_001145444,NM\_001145445,NM\_020706,NM\_001145444,NM\_001145445,NM\_020706  
NM\_003086,NM\_003086  
NM\_001309434,NM\_003134  
NM\_000721,NM\_001205293,NM\_001205294  
NM\_001173984,NM\_013263  
NM\_001289000,NM\_001289001,NM\_153609  
NM\_003086  
NM\_001127892,NM\_002968  
NM\_001145444,NM\_001145445,NM\_020706  
NM\_001173984,NM\_013263,NM\_001173984,NM\_013263  
NM\_000721,NM\_001205293,NM\_001205294,NM\_000721,NM\_001205293,NM\_001205294  
NM\_001309434,NM\_003134,NM\_001309434,NM\_003134  
NM\_001289000,NM\_001289001,NM\_153609,NM\_001289000,NM\_001289001,NM\_153609  
NM\_001127892,NM\_002968,NM\_001127892,NM\_002968  
NM\_001145444,NM\_001145445,NM\_020706,NM\_001145444,NM\_001145445,NM\_020706  
NM\_001309434,NM\_003134  
NM\_000721,NM\_001205293,NM\_001205294  
NM\_001173984,NM\_013263  
NM\_001289000,NM\_001289001,NM\_153609  
NM\_001127892,NM\_002968  
NM\_001145444,NM\_001145445,NM\_020706  
NM\_177998,NM\_177998  
NM\_170606,NM\_170606  
NM\_000930,NM\_001319189,NM\_033011,NM\_000930,NM\_001319189,NM\_033011  
NM\_175918,NM\_175918  
NM\_001079518,NM\_001267797,NM\_014815,NM\_001079518,NM\_001267797,NM\_014815  
NM\_001290224,NM\_199259,NM\_199260,NM\_199261,NM\_001290224,NM\_199259,NM\_199260,NM\_199261  
NM\_003037,NM\_003037  
NM\_001024847,NM\_003242,NM\_001024847,NM\_003242  
NM\_015409,NM\_015409,NM\_015409,NM\_015409  
NM\_001159531,NM\_020836,NM\_001159531,NM\_020836  
NM\_001262,NM\_078626,NM\_001262,NM\_078626  
NM\_001291415,NM\_001291416,NM\_001291417,NM\_001291418,NM\_001291421,NM\_021140,NM\_001291415  
NM\_001282484,NM\_001282484  
NM\_001143819,NM\_001301214,NM\_017901,NM\_001143819,NM\_001301214,NM\_017901  
NM\_003327,NM\_003327  
NM\_005760,NM\_005760  
NM\_001278055,NM\_014363,NM\_001278055,NM\_014363  
NM\_001173984,NM\_013263,NM\_001173984,NM\_013263  
NM\_000481,NM\_001164710,NM\_001164712,NM\_000481,NM\_001164710,NM\_001164712  
NM\_001271,NM\_001271

NM\_032135,NM\_032135  
NM\_182832,NM\_182832  
NM\_001257190,NM\_172020,NM\_001257190,NM\_172020  
NM\_005157,NM\_007313,NM\_005157,NM\_007313  
NM\_174924,NM\_174924  
NM\_001152,NM\_001152  
NM\_032727,NM\_032727  
NM\_033060,NM\_033060  
NM\_001256876,NM\_001256877,NM\_015158,NM\_153186,NM\_001256876,NM\_001256877,NM\_015158,NM\_014698,NM\_014698  
NM\_001098407,NM\_001127212,NM\_001472,NM\_012196,NM\_001098407,NM\_001127212,NM\_001472,NM\_014272,NM\_014272  
NM\_001293089,NM\_001293089  
NM\_018975,NM\_018975  
NM\_000332,NM\_001128164,NM\_000332,NM\_001128164  
NM\_152672,NM\_152672  
NM\_152243,NM\_152243  
NM\_033188,NM\_033188  
NM\_001077262,NM\_145345,NM\_183008,NM\_001077262,NM\_145345,NM\_183008  
NM\_001240,NM\_001240  
NM\_001001480,NM\_001001480  
NM\_001080396,NM\_001080396  
NM\_001282959,NM\_001282960,NM\_018237,NM\_001282959,NM\_001282960,NM\_018237  
NM\_001297590,NM\_012099,NM\_001297590,NM\_012099  
NM\_001288715,NM\_001288716,NM\_001288717,NM\_001332,NM\_001288715,NM\_001288716,NM\_001288716  
NM\_005760  
NM\_005157,NM\_007313  
NM\_001278055,NM\_014363  
NM\_175918  
NM\_177998  
NM\_001257190,NM\_172020  
NM\_170606  
NM\_003037  
NM\_001024847,NM\_003242  
NM\_000930,NM\_001319189,NM\_033011  
NM\_015409,NM\_015409  
NM\_001098407,NM\_001127212,NM\_001472,NM\_012196  
NM\_001173984,NM\_013263  
NM\_000481,NM\_001164710,NM\_001164712  
NM\_001159531,NM\_020836  
NM\_001143819,NM\_001301214,NM\_017901  
NM\_001079518,NM\_001267797,NM\_014815  
NM\_182832  
NM\_001293089  
NM\_003327  
NM\_174924  
NM\_001291415,NM\_001291416,NM\_001291417,NM\_001291418,NM\_001291421,NM\_021140

NM\_005392  
NM\_152243  
NM\_001152  
NM\_001290224,NM\_199259,NM\_199260,NM\_199261  
NM\_001282484  
NM\_001256876,NM\_001256877,NM\_015158,NM\_153186  
NM\_001297590,NM\_012099  
NM\_001262,NM\_078626  
NM\_014698  
NM\_032135  
NM\_001288715,NM\_001288716,NM\_001288717,NM\_001332  
NM\_152672  
NM\_033060  
NM\_032727  
NM\_014272  
NM\_001001480  
NM\_001301043,NM\_001301044,NM\_014333  
NM\_001271  
NM\_001240  
NM\_018975  
NM\_033188  
NM\_001077262,NM\_145345,NM\_183008  
NM\_001243799,NM\_183422  
NM\_001080396  
NM\_001282959,NM\_001282960,NM\_018237  
NM\_000332,NM\_001128164  
NM\_001160,NM\_013229,NM\_181861,NM\_181868,NM\_001160,NM\_013229,NM\_181861,NM\_181868  
NM\_000930,NM\_001319189,NM\_033011,NM\_000930,NM\_001319189,NM\_033011  
NM\_001301031,NM\_001301032,NM\_001301033,NM\_004727,NM\_001301031,NM\_001301032,NM\_001301  
NM\_030979,NM\_030979  
NM\_198944,NM\_198944  
NM\_004980,NM\_172198,NM\_004980,NM\_172198  
NM\_001262,NM\_078626,NM\_001262,NM\_078626  
NM\_015719,NM\_015719  
NM\_001258411,NM\_001258412,NM\_001258413,NM\_001258414,NM\_052944,NM\_001258411,NM\_001258  
NM\_004742,NM\_015520,NM\_004742,NM\_015520  
NM\_001204087,NM\_002249,NM\_170782,NM\_001204087,NM\_002249,NM\_170782  
NM\_001291415,NM\_001291416,NM\_001291417,NM\_001291418,NM\_001291421,NM\_021140,NM\_001291  
NM\_001282484,NM\_001282484  
NM\_001114121,NM\_001114122,NM\_001244846,NM\_001274,NM\_001114121,NM\_001114122,NM\_001244  
NM\_001080850,NM\_001080850  
NM\_001173984,NM\_013263,NM\_001173984,NM\_013263  
NM\_139173,NM\_139173  
NM\_018727,NM\_080704,NM\_080705,NM\_080706,NM\_018727,NM\_080704,NM\_080705,NM\_080706  
NM\_000466,NM\_001282677,NM\_001282678,NM\_000466,NM\_001282677,NM\_001282678  
NM\_032135,NM\_032135  
NM\_006118,NM\_006118

NM\_001168221,NM\_152525,NM\_001168221,NM\_152525  
NM\_182614,NM\_182614  
NM\_001319179,NM\_001319180,NM\_018284,NM\_001319179,NM\_001319180,NM\_018284  
NM\_018365,NM\_018365  
NM\_001152,NM\_001152  
NM\_001184985,NM\_014823,NM\_018979,NM\_213655,NM\_001184985,NM\_014823,NM\_018979,NM\_2136!  
NM\_015172,NM\_015172  
NM\_001118887,NM\_001118888,NM\_001147,NM\_001118887,NM\_001118888,NM\_001147  
NM\_033060,NM\_033060  
NM\_001276270,NM\_001276271,NM\_001276272,NM\_003925,NM\_001276270,NM\_001276271,NM\_001276  
NM\_001098407,NM\_001127212,NM\_001472,NM\_012196,NM\_001098407,NM\_001127212,NM\_001472,NM  
NM\_002653,NM\_002653  
NM\_001013843,NM\_024755,NM\_001013843,NM\_024755  
NM\_001297644,NM\_001297645,NM\_001318000,NM\_005869,NM\_001297644,NM\_001297645,NM\_001318  
NM\_016107,NM\_016107  
NM\_001134937,NM\_001134938,NM\_030917,NM\_001134937,NM\_001134938,NM\_030917  
NM\_152243,NM\_152243  
NM\_033188,NM\_033188  
NM\_001077262,NM\_145345,NM\_183008,NM\_001077262,NM\_145345,NM\_183008  
NM\_001240,NM\_001240  
NM\_018660,NM\_018660  
NM\_015576,NM\_015576  
NM\_001288715,NM\_001288716,NM\_001288717,NM\_001332,NM\_001288715,NM\_001288716,NM\_001288  
NM\_018660  
NM\_000466,NM\_001282677,NM\_001282678  
NM\_015719  
NM\_004980,NM\_172198  
NM\_182614  
NM\_001160,NM\_013229,NM\_181861,NM\_181868  
NM\_030979  
NM\_001168221,NM\_152525  
NM\_001297644,NM\_001297645,NM\_001318000,NM\_005869  
NM\_000930,NM\_001319189,NM\_033011  
NM\_001098407,NM\_001127212,NM\_001472,NM\_012196  
NM\_001319179,NM\_001319180,NM\_018284  
NM\_001173984,NM\_013263  
NM\_004742,NM\_015520  
NM\_139173  
NM\_001291415,NM\_001291416,NM\_001291417,NM\_001291418,NM\_001291421,NM\_021140  
NM\_152243  
NM\_001204087,NM\_002249,NM\_170782  
NM\_001258411,NM\_001258412,NM\_001258413,NM\_001258414,NM\_052944  
NM\_198944  
NM\_001184985,NM\_014823,NM\_018979,NM\_213655  
NM\_001152  
NM\_001282484  
NM\_016107



NM\_018365  
NM\_001301031,NM\_001301032,NM\_001301033,NM\_004727  
NM\_001114121,NM\_001114122,NM\_001244846,NM\_001274  
NM\_015576  
NM\_001262,NM\_078626  
NM\_001276270,NM\_001276271,NM\_001276272,NM\_003925  
NM\_018727,NM\_080704,NM\_080705,NM\_080706  
NM\_001013843,NM\_024755  
NM\_032135  
NM\_001288715,NM\_001288716,NM\_001288717,NM\_001332  
NM\_033060  
NM\_001118887,NM\_001118888,NM\_001147  
NM\_006118  
NM\_001240  
NM\_001080850  
NM\_002653  
NM\_033188  
NM\_001077262,NM\_145345,NM\_183008  
NM\_015172  
NM\_001134937,NM\_001134938,NM\_030917  
NM\_000930,NM\_001319189,NM\_033011,NM\_000930,NM\_001319189,NM\_033011  
NM\_001262,NM\_078626,NM\_001262,NM\_078626  
NM\_001291415,NM\_001291416,NM\_001291417,NM\_001291418,NM\_001291421,NM\_021140,NM\_001291  
NM\_000930,NM\_001319189,NM\_033011  
NM\_001291415,NM\_001291416,NM\_001291417,NM\_001291418,NM\_001291421,NM\_021140  
NM\_001262,NM\_078626  
NM\_000268,NM\_016418,NM\_181825,NM\_181828,NM\_181829,NM\_181830,NM\_181831,NM\_181832,NM\_  
NM\_005157,NM\_007313,NM\_005157,NM\_007313  
NM\_005157,NM\_007313  
NM\_000268,NM\_016418,NM\_181825,NM\_181828,NM\_181829,NM\_181830,NM\_181831,NM\_181832  
NM\_001290224,NM\_199259,NM\_199260,NM\_199261,NM\_001290224,NM\_199259,NM\_199260,NM\_199261  
NM\_175918,NM\_175918,NM\_175918,NM\_175918,NM\_175918,NM\_175918  
NM\_139173,NM\_139173  
NM\_001173984,NM\_013263,NM\_001173984,NM\_013263  
NM\_001288607,NM\_001288608,NM\_019032,NM\_025008,NM\_001288607,NM\_001288608,NM\_019032,NM\_  
NM\_001318502,NM\_019892,NM\_001318502,NM\_019892  
NM\_001258210,NM\_001318477,NM\_001318478,NM\_001318479,NM\_015516,NM\_001258210,NM\_001318  
NM\_001286990,NM\_007001,NM\_001286990,NM\_007001  
NM\_001098479,NM\_001098479  
NM\_002830,NM\_002830  
NM\_173493,NM\_173493  
NM\_001257190,NM\_172020,NM\_001257190,NM\_172020  
NM\_001152,NM\_001152  
NM\_002515,NM\_006489,NM\_006491,NM\_002515,NM\_006489,NM\_006491  
NM\_001632,NM\_001632  
NM\_000721,NM\_001205293,NM\_001205294,NM\_000721,NM\_001205293,NM\_001205294  
NM\_001105659,NM\_001322315,NM\_001105659,NM\_001322315

NM\_033060,NM\_033060  
NM\_001197295,NM\_001197296,NM\_001393,NM\_001197295,NM\_001197296,NM\_001393  
NM\_001143819,NM\_001301214,NM\_017901,NM\_001143819,NM\_001301214,NM\_017901  
NM\_004628,NM\_004628  
NM\_001002924,NM\_001284,NM\_001318091,NM\_001318093,NM\_001318094,NM\_001002924,NM\_001284  
NM\_001017395,NM\_001017395,NM\_001128224,NM\_001128224,NM\_001017395,NM\_001017395,NM\_001  
NM\_001277325,NM\_001277325  
NM\_001282484,NM\_001282484  
NM\_001267843,NM\_004898,NM\_001267843,NM\_004898  
NM\_001127708,NM\_001127708,NM\_001127709,NM\_001127709,NM\_001127710,NM\_001127710,NM\_001  
NM\_001329226,NM\_014045,NM\_001329226,NM\_014045  
NM\_001145966,NM\_002417,NM\_001145966,NM\_002417  
NM\_014698,NM\_014698  
NM\_022093,NM\_022093  
NM\_020154,NM\_020154  
NM\_015063,NM\_015063  
NM\_007113,NM\_007113  
NM\_001288715,NM\_001288716,NM\_001288717,NM\_001332,NM\_001288715,NM\_001288716,NM\_001288  
NM\_001142524,NM\_001142525,NM\_001142526,NM\_001142527,NM\_001142528,NM\_001142529,NM\_001  
NM\_006063,NM\_006063  
NM\_016107,NM\_016107  
NM\_005401,NM\_005401  
NM\_006118,NM\_006118  
NM\_152672,NM\_152672  
NM\_030785,NM\_030785  
NM\_001269040,NM\_001269041,NM\_001269042,NM\_001269043,NM\_001269044,NM\_001269045,NM\_001  
NM\_001145444,NM\_001145445,NM\_020706,NM\_001145444,NM\_001145445,NM\_020706  
NM\_001177465,NM\_001177466,NM\_005491,NM\_001177465,NM\_001177466,NM\_005491  
NM\_173493  
NM\_001017395,NM\_001017395,NM\_001128224,NM\_001128224  
NM\_001257190,NM\_172020  
NM\_000721,NM\_001205293,NM\_001205294  
NM\_001288607,NM\_001288608,NM\_019032,NM\_025008  
NM\_001329226,NM\_014045  
NM\_001258210,NM\_001318477,NM\_001318478,NM\_001318479,NM\_015516  
NM\_001286990,NM\_007001  
NM\_175918,NM\_175918,NM\_175918  
NM\_002830  
NM\_001318502,NM\_019892  
NM\_002515,NM\_006489,NM\_006491  
NM\_001105659,NM\_001322315  
NM\_001098479  
NM\_001002924,NM\_001284,NM\_001318091,NM\_001318093,NM\_001318094  
NM\_139173  
NM\_001143819,NM\_001301214,NM\_017901  
NM\_001152  
NM\_001282484

NM\_020154  
NM\_001632  
NM\_001173984,NM\_013263  
NM\_006063  
NM\_001288715,NM\_001288716,NM\_001288717,NM\_001332  
NM\_014698  
NM\_033060  
NM\_015063  
NM\_001290224,NM\_199259,NM\_199260,NM\_199261  
NM\_022093  
NM\_001127708,NM\_001127708,NM\_001127709,NM\_001127709,NM\_001127710,NM\_001127710,NM\_001  
NM\_001277325  
NM\_001145966,NM\_002417  
NM\_016107  
NM\_001269040,NM\_001269041,NM\_001269042,NM\_001269043,NM\_001269044,NM\_001269045,NM\_001  
NM\_007113  
NM\_005401  
NM\_152672  
NM\_001267843,NM\_004898  
NM\_006118  
NM\_004628  
NM\_001142524,NM\_001142525,NM\_001142526,NM\_001142527,NM\_001142528,NM\_001142529,NM\_001  
NM\_001197295,NM\_001197296,NM\_001393  
NM\_001177465,NM\_001177466,NM\_005491  
NM\_001145444,NM\_001145445,NM\_020706  
NM\_030785  
NM\_001301228,NM\_001301229,NM\_001301231,NM\_005342  
NM\_000718,NM\_001243812,NM\_000718,NM\_001243812  
NM\_175918,NM\_175918,NM\_175918,NM\_175918  
NM\_198525,NM\_198525  
NM\_139173,NM\_139173  
NM\_001173984,NM\_013263,NM\_001173984,NM\_013263  
NM\_001207019,NM\_001220500,NM\_002002,NM\_001207019,NM\_001220500,NM\_002002  
NM\_032603,NM\_032603  
NM\_001098407,NM\_001127212,NM\_001472,NM\_012196,NM\_001098407,NM\_001127212,NM\_001472,NM  
NM\_001184985,NM\_014823,NM\_018979,NM\_213655,NM\_001184985,NM\_014823,NM\_018979,NM\_2136  
NM\_015560,NM\_130831,NM\_130832,NM\_130833,NM\_130834,NM\_130835,NM\_130836,NM\_130837,NM\_  
NM\_001098479,NM\_001098479  
NM\_173493,NM\_173493  
NM\_001031855,NM\_001289109,NM\_024778,NM\_001031855,NM\_001289109,NM\_024778  
NM\_001152,NM\_001152  
NM\_001105659,NM\_001322315,NM\_001105659,NM\_001322315  
NM\_033060,NM\_033060  
NM\_001002924,NM\_001284,NM\_001318091,NM\_001318093,NM\_001318094,NM\_001002924,NM\_001284  
NM\_001145079,NM\_020751,NM\_001145079,NM\_020751  
NM\_001282484,NM\_001282484  
NM\_007126,NM\_007126

NM\_001085377,NM\_001085377  
NM\_001278651,NM\_001317930,NM\_002883,NM\_001278651,NM\_001317930,NM\_002883  
NM\_001145966,NM\_002417,NM\_001145966,NM\_002417  
NM\_022093,NM\_022093  
NM\_001288715,NM\_001288716,NM\_001288717,NM\_001332,NM\_001288715,NM\_001288716,NM\_001288  
NM\_006063,NM\_006063  
NM\_001127708,NM\_001127709,NM\_001127710,NM\_001303232,NM\_005807,NM\_001127708,NM\_001127  
NM\_001288973,NM\_001288974,NM\_001288975,NM\_003474,NM\_021641,NM\_001288973,NM\_001288974  
NM\_001145444,NM\_001145445,NM\_020706,NM\_001145444,NM\_001145445,NM\_020706  
NM\_173493  
NM\_001031855,NM\_001289109,NM\_024778  
NM\_000718,NM\_001243812  
NM\_001145079,NM\_020751  
NM\_175918,NM\_175918  
NM\_198525  
NM\_015560,NM\_130831,NM\_130832,NM\_130833,NM\_130834,NM\_130835,NM\_130836,NM\_130837  
NM\_001098407,NM\_001127212,NM\_001472,NM\_012196  
NM\_001098407,NM\_001127212,NM\_001472,NM\_012196  
NM\_001105659,NM\_001322315  
NM\_001085377  
NM\_001098479  
NM\_001002924,NM\_001284,NM\_001318091,NM\_001318093,NM\_001318094  
NM\_032603  
NM\_139173  
NM\_001152  
NM\_001282484  
NM\_001173984,NM\_013263  
NM\_006063  
NM\_001207019,NM\_001220500,NM\_002002  
NM\_001288715,NM\_001288716,NM\_001288717,NM\_001332  
NM\_033060  
NM\_022093  
NM\_001278651,NM\_001317930,NM\_002883  
NM\_007126  
NM\_001184985,NM\_014823,NM\_018979,NM\_213655  
NM\_001127708,NM\_001127709,NM\_001127710,NM\_001303232,NM\_005807  
NM\_001145966,NM\_002417  
NM\_001288973,NM\_001288974,NM\_001288975,NM\_003474,NM\_021641  
NM\_001145444,NM\_001145445,NM\_020706  
NM\_000718,NM\_001243812,NM\_000718,NM\_001243812  
NM\_001007257,NM\_012231,NM\_015866,NM\_001007257,NM\_012231,NM\_015866  
NM\_175918,NM\_175918,NM\_175918,NM\_175918,NM\_175918,NM\_175918  
NM\_024501,NM\_024501  
NM\_198944,NM\_198944  
NM\_139173,NM\_139173  
NM\_001173984,NM\_013263,NM\_001173984,NM\_013263  
NM\_005157,NM\_007313,NM\_005157,NM\_007313

NM\_001098407,NM\_001127212,NM\_001472,NM\_012196,NM\_001098407,NM\_001127212,NM\_001472,NM\_007214,NM\_007214  
NM\_015560,NM\_130831,NM\_130832,NM\_130833,NM\_130834,NM\_130835,NM\_130836,NM\_130837,NM\_000260,NM\_001127180,NM\_000260,NM\_001127180  
NM\_001031855,NM\_001289109,NM\_024778,NM\_001031855,NM\_001289109,NM\_024778  
NM\_001282674,NM\_001282674  
NM\_001152,NM\_001152  
NM\_018353,NM\_018353  
NM\_033060,NM\_033060  
NM\_001145079,NM\_020751,NM\_001145079,NM\_020751  
NM\_001282484,NM\_001282484  
NM\_001085377,NM\_001085377  
NM\_033188,NM\_033188  
NM\_005886,NM\_005886  
NM\_022093,NM\_022093  
NM\_182832,NM\_182832  
NM\_001288715,NM\_001288716,NM\_001288717,NM\_001332,NM\_001288715,NM\_001288716,NM\_001288716,NM\_001288716,NM\_006063,NM\_006063  
NM\_001127708,NM\_001127709,NM\_001127710,NM\_001303232,NM\_005807,NM\_001127708,NM\_001127708,NM\_001127708,NM\_006885,NM\_006885,NM\_001164766,NM\_006885  
NM\_001001480,NM\_001001480  
NM\_021963,NM\_021963  
NM\_005157,NM\_007313  
NM\_024501  
NM\_000260,NM\_001127180  
NM\_001031855,NM\_001289109,NM\_024778  
NM\_001007257,NM\_012231,NM\_015866  
NM\_000718,NM\_001243812  
NM\_001145079,NM\_020751  
NM\_175918,NM\_175918,NM\_175918  
NM\_005886  
NM\_015560,NM\_130831,NM\_130832,NM\_130833,NM\_130834,NM\_130835,NM\_130836,NM\_130837  
NM\_001098407,NM\_001127212,NM\_001472,NM\_012196  
NM\_001098407,NM\_001127212,NM\_001472,NM\_012196  
NM\_001085377  
NM\_198944  
NM\_139173  
NM\_007214  
NM\_182832  
NM\_001152  
NM\_001282484  
NM\_001173984,NM\_013263  
NM\_001282674  
NM\_001001480  
NM\_006063  
NM\_001288715,NM\_001288716,NM\_001288717,NM\_001332  
NM\_033060

NM\_022093  
NM\_001127708,NM\_001127709,NM\_001127710,NM\_001303232,NM\_005807  
NM\_018353  
NM\_021963  
NM\_001177465,NM\_001177466,NM\_005491  
NM\_033188  
NM\_001164766,NM\_006885  
NM\_001127891,NM\_001302508,NM\_001302509,NM\_001302510,NM\_004530,NM\_001127891,NM\_001302  
NM\_002205,NM\_002205  
NM\_000132,NM\_000132  
NM\_015560,NM\_130831,NM\_130832,NM\_130833,NM\_130834,NM\_130835,NM\_130836,NM\_130837,NM\_  
NM\_020730,NM\_020730  
NM\_001145079,NM\_020751,NM\_001145079,NM\_020751  
NM\_004629,NM\_004629  
NM\_001031855,NM\_001289109,NM\_024778,NM\_001031855,NM\_001289109,NM\_024778  
NM\_199242,NM\_199242  
NM\_003845,NM\_003845  
NM\_022093,NM\_022093  
NM\_001256721,NM\_006430,NM\_001256721,NM\_006430  
NM\_015054,NM\_015054  
NM\_006063,NM\_006063  
NM\_001127891,NM\_001302508,NM\_001302509,NM\_001302510,NM\_004530  
NM\_001031855,NM\_001289109,NM\_024778  
NM\_001145079,NM\_020751  
NM\_015560,NM\_130831,NM\_130832,NM\_130833,NM\_130834,NM\_130835,NM\_130836,NM\_130837  
NM\_199242  
NM\_003845  
NM\_002205  
NM\_020730  
NM\_000132  
NM\_006063  
NM\_001256721,NM\_006430  
NM\_001256721,NM\_006430  
NM\_004629  
NM\_022093  
NM\_015054  
NM\_001285439,NM\_001285440,NM\_152756,NM\_001285439,NM\_001285440,NM\_152756  
NM\_001079846,NM\_004380,NM\_001079846,NM\_004380  
NM\_001110556,NM\_001456,NM\_001110556,NM\_001456  
NM\_002001,NM\_002001  
NM\_001318787,NM\_001318789,NM\_001318790,NM\_001318791,NM\_001318793,NM\_001318795,NM\_001  
NM\_000888,NM\_001282353,NM\_001282354,NM\_001282355,NM\_001282388,NM\_001282389,NM\_001282  
NM\_199242,NM\_199242  
NM\_001110556,NM\_001456  
NM\_001318787,NM\_001318789,NM\_001318790,NM\_001318791,NM\_001318793,NM\_001318795,NM\_001  
NM\_199242  
NM\_001285439,NM\_001285440,NM\_152756

NM\_001079846,NM\_004380  
NM\_002001  
NM\_000888,NM\_001282353,NM\_001282354,NM\_001282355,NM\_001282388,NM\_001282389,NM\_001282  
NM\_198471,NM\_198471  
NM\_198557,NM\_198557  
NM\_004645,NM\_004645  
NM\_198557  
NM\_198471  
NM\_004645  
NM\_014244,NM\_021599,NM\_014244,NM\_021599  
NM\_001004128,NM\_002826,NM\_001004128,NM\_002826  
NM\_000527,NM\_001195798,NM\_001195799,NM\_001195800,NM\_001195803,NM\_000527,NM\_001195798  
NM\_030651,NM\_030651  
NM\_152390,NM\_152390  
NM\_001014797,NM\_001161352,NM\_001161353,NM\_001271518,NM\_001271519,NM\_001322829,NM\_001  
NM\_207371,NM\_207371  
NM\_000966,NM\_001042728,NM\_001243730,NM\_001243731,NM\_001243732,NM\_000966,NM\_001042728  
NM\_000966,NM\_001042728,NM\_001243730,NM\_001243731,NM\_001243732  
NM\_000527,NM\_001195798,NM\_001195799,NM\_001195800,NM\_001195803  
NM\_001004128,NM\_002826  
NM\_152390  
NM\_030651  
NM\_014244,NM\_021599  
NM\_001014797,NM\_001161352,NM\_001161353,NM\_001271518,NM\_001271519,NM\_001322829,NM\_001  
NM\_207371  
NM\_002356,NM\_002356  
NM\_001164380,NM\_001164381,NM\_001164382,NM\_001164383,NM\_001164384,NM\_001164385,NM\_014  
NM\_198557,NM\_198557  
NM\_175918,NM\_175918,NM\_175918,NM\_175918  
NM\_001173984,NM\_013263,NM\_001173984,NM\_013263  
NM\_198944,NM\_198944  
NM\_001136112,NM\_004347,NM\_001136112,NM\_004347  
NM\_001290224,NM\_199259,NM\_199260,NM\_199261,NM\_001290224,NM\_199259,NM\_199260,NM\_19926  
NM\_001293089,NM\_001293089  
NM\_001257190,NM\_172020,NM\_001257190,NM\_172020  
NM\_001013843,NM\_024755,NM\_001013843,NM\_024755  
NM\_002568,NM\_002568  
NM\_001126057,NM\_001126058,NM\_001190348,NM\_001190349,NM\_033317,NM\_001126057,NM\_001126  
NM\_033060,NM\_033060  
NM\_033188,NM\_033188  
NM\_006121,NM\_006121  
NM\_032135,NM\_032135  
NM\_033187,NM\_033187  
NM\_001001480,NM\_001001480  
NM\_001164380,NM\_001164381,NM\_001164382,NM\_001164383,NM\_001164384,NM\_001164385,NM\_014  
NM\_198557  
NM\_001136112,NM\_004347

NM\_175918,NM\_175918  
NM\_001257190,NM\_172020  
NM\_001173984,NM\_013263  
NM\_002568  
NM\_198944  
NM\_001290224,NM\_199259,NM\_199260,NM\_199261  
NM\_001301043,NM\_001301044,NM\_014333  
NM\_002356  
NM\_001114091,NM\_001256,NM\_001293089,NM\_001293091  
NM\_032135  
NM\_033060  
NM\_006121  
NM\_033187  
NM\_001013843,NM\_024755  
NM\_001126057,NM\_001126058,NM\_001190348,NM\_001190349,NM\_033317  
NM\_033188  
NM\_001001480  
NM\_004638,NM\_080686,NM\_004638,NM\_080686  
NM\_001320715,NM\_003921,NM\_001320715,NM\_003921  
NM\_001007257,NM\_012231,NM\_015866,NM\_001007257,NM\_012231,NM\_015866  
NM\_001098407,NM\_001127212,NM\_001472,NM\_012196,NM\_001098407,NM\_001127212,NM\_001472,NM  
NM\_001130960,NM\_014996,NM\_001130960,NM\_014996  
NM\_001271733,NM\_001271733  
NM\_014949,NM\_014949  
NM\_001278579,NM\_001278580,NM\_001616,NM\_001278579,NM\_001278580,NM\_001616  
NM\_001136112,NM\_004347,NM\_001136112,NM\_004347  
NM\_001173984,NM\_013263,NM\_001173984,NM\_013263  
NM\_014696,NM\_014696  
NM\_001293089,NM\_001293089  
NM\_001204087,NM\_002249,NM\_170782,NM\_001204087,NM\_002249,NM\_170782  
NM\_001290224,NM\_199259,NM\_199260,NM\_199261,NM\_001290224,NM\_199259,NM\_199260,NM\_199261  
NM\_002568,NM\_002568  
NM\_001271,NM\_001271  
NM\_001240,NM\_001240  
NM\_001282484,NM\_001282484  
NM\_001257190,NM\_172020,NM\_001257190,NM\_172020  
NM\_001105659,NM\_001322315,NM\_001105659,NM\_001322315  
NM\_001003407,NM\_001003408,NM\_001322882,NM\_001322883,NM\_001322884,NM\_001322885,NM\_001  
NM\_001013843,NM\_024755,NM\_001013843,NM\_024755  
NM\_033060,NM\_033060  
NM\_006678,NM\_006678  
NM\_006121,NM\_006121  
NM\_001126057,NM\_001126058,NM\_001190348,NM\_001190349,NM\_033317,NM\_001126057,NM\_001126  
NM\_033188,NM\_033188  
NM\_152672,NM\_152672  
NM\_032135,NM\_032135  
NM\_033187,NM\_033187



NM\_004645,NM\_004645  
NM\_001080395,NM\_004920,NM\_001080395,NM\_004920  
NM\_178354,NM\_178354  
NM\_001039649,NM\_001039650,NM\_001142684,NM\_001039649,NM\_001039650,NM\_001142684  
NM\_005401,NM\_005401  
NM\_020815,NM\_032961,NM\_020815,NM\_032961  
NM\_030785,NM\_030785  
NM\_018975,NM\_018975  
NM\_001136112,NM\_004347  
NM\_014696  
NM\_001257190,NM\_172020  
NM\_004638,NM\_080686  
NM\_001173984,NM\_013263  
NM\_002568  
NM\_001320715,NM\_003921  
NM\_001007257,NM\_012231,NM\_015866  
NM\_001204087,NM\_002249,NM\_170782  
NM\_001290224,NM\_199259,NM\_199260,NM\_199261  
NM\_001003407,NM\_001003408,NM\_001322882,NM\_001322883,NM\_001322884,NM\_001322885,NM\_001  
NM\_001080395,NM\_004920  
NM\_006678  
NM\_001098407,NM\_001127212,NM\_001472,NM\_012196  
NM\_014949  
NM\_001114091,NM\_001256,NM\_001293089,NM\_001293091  
NM\_001271733  
NM\_001130960,NM\_014996  
NM\_001105659,NM\_001322315  
NM\_001039649,NM\_001039650,NM\_001142684  
NM\_001282484  
NM\_001278579,NM\_001278580,NM\_001616  
NM\_005401  
NM\_032135  
NM\_033060  
NM\_001240  
NM\_178354  
NM\_004645  
NM\_020815,NM\_032961  
NM\_152672  
NM\_006121  
NM\_033187  
NM\_001013843,NM\_024755  
NM\_001126057,NM\_001126058,NM\_001190348,NM\_001190349,NM\_033317  
NM\_033188  
NM\_018975  
NM\_001243799,NM\_183422  
NM\_001271  
NM\_030785

NM\_001010870,NM\_001168359,NM\_001010870,NM\_001168359  
NM\_001315529,NM\_006031,NM\_001315529,NM\_006031  
NM\_000466,NM\_001282677,NM\_001282678,NM\_000466,NM\_001282677,NM\_001282678  
NM\_001278055,NM\_014363,NM\_001278055,NM\_014363  
NM\_175918,NM\_175918,NM\_175918,NM\_175918,NM\_175918,NM\_175918  
NM\_014949,NM\_014949  
NM\_001014342,NM\_001014342  
NM\_001173984,NM\_013263,NM\_001173984,NM\_013263  
NM\_001207005,NM\_181756,NM\_001207005,NM\_181756  
NM\_001271783,NM\_001271784,NM\_018099,NM\_001271783,NM\_001271784,NM\_018099  
NM\_001272011,NM\_014226,NM\_001272011,NM\_014226  
NM\_152945,NM\_152945  
NM\_001290224,NM\_199259,NM\_199260,NM\_199261,NM\_001290224,NM\_199259,NM\_199260,NM\_199261  
NM\_001321859,NM\_001321860,NM\_001321861,NM\_001321862,NM\_001321863,NM\_001321904,NM\_0201321904  
NM\_001080850,NM\_001080850  
NM\_001257190,NM\_172020,NM\_001257190,NM\_172020  
NM\_001013843,NM\_024755,NM\_001013843,NM\_024755  
NM\_002568,NM\_002568  
NM\_001204087,NM\_002249,NM\_170782,NM\_001204087,NM\_002249,NM\_170782  
NM\_000721,NM\_001205293,NM\_001205294,NM\_000721,NM\_001205293,NM\_001205294  
NM\_001308079,NM\_001308079  
NM\_001003407,NM\_001003408,NM\_001322882,NM\_001322883,NM\_001322884,NM\_001322885,NM\_001322886  
NM\_001040108,NM\_014381,NM\_001040108,NM\_014381  
NM\_001282606,NM\_001282610,NM\_016056,NM\_001282606,NM\_001282610,NM\_016056  
NM\_001319238,NM\_001319239,NM\_014827,NM\_001319238,NM\_001319239,NM\_014827  
NM\_001002924,NM\_001284,NM\_001318091,NM\_001318093,NM\_001318094,NM\_001002924,NM\_001284  
NM\_003008,NM\_003008  
NM\_001271,NM\_001271  
NM\_001203260,NM\_001203261,NM\_001204054,NM\_004549,NM\_001203260,NM\_001203261,NM\_001204054  
NM\_001126057,NM\_001126058,NM\_001190348,NM\_001190349,NM\_033317,NM\_001126057,NM\_001126058  
NM\_033060,NM\_033060  
NM\_201269,NM\_201269  
NM\_001308116,NM\_024947,NM\_001308116,NM\_024947  
NM\_033188,NM\_033188  
NM\_006121,NM\_006121  
NM\_017481,NM\_017481  
NM\_014698,NM\_014698  
NM\_002976,NM\_002976  
NM\_178354,NM\_178354  
NM\_152672,NM\_152672  
NM\_000254,NM\_001291939,NM\_001291940,NM\_000254,NM\_001291939,NM\_001291940  
NM\_015063,NM\_015063  
NM\_182832,NM\_182832  
NM\_007113,NM\_007113  
NM\_001240,NM\_001240  
NM\_016216,NM\_016216  
NM\_014729,NM\_014729

NM\_006231,NM\_006231  
NM\_014005,NM\_014005  
NM\_001142556,NM\_001142557,NM\_012484,NM\_012485,NM\_001142556,NM\_001142557,NM\_012484,NM\_001276385,NM\_001276385  
NM\_021076,NM\_021076  
NM\_001004056,NM\_001004057,NM\_005307,NM\_182982,NM\_001004056,NM\_001004057,NM\_005307,NM\_001316951,NM\_018559,NM\_001316951,NM\_018559  
NM\_001128620,NM\_002576,NM\_001128620,NM\_002576  
NM\_030785,NM\_030785  
NM\_001001480,NM\_001001480  
NM\_001278055,NM\_014363  
NM\_001278055,NM\_014363  
NM\_001278055,NM\_014363  
NM\_000254,NM\_001291939,NM\_001291940  
NM\_001207005,NM\_181756  
NM\_175918,NM\_175918,NM\_175918  
NM\_001257190,NM\_172020  
NM\_001173984,NM\_013263  
NM\_002568  
NM\_001203260,NM\_001203261,NM\_001204054,NM\_004549  
NM\_000466,NM\_001282677,NM\_001282678  
NM\_001002924,NM\_001284,NM\_001318091,NM\_001318093,NM\_001318094  
NM\_001308116,NM\_024947  
NM\_000721,NM\_001205293,NM\_001205294  
NM\_001204087,NM\_002249,NM\_170782  
NM\_001282609  
NM\_001290224,NM\_199259,NM\_199260,NM\_199261  
NM\_001301043,NM\_001301044,NM\_014333  
NM\_015063  
NM\_001003407,NM\_001003408,NM\_001322882,NM\_001322883,NM\_001322884,NM\_001322885,NM\_001016216  
NM\_001308079  
NM\_014949  
NM\_001014342  
NM\_001040108,NM\_014381  
NM\_001319238,NM\_001319239,NM\_014827  
NM\_001272011,NM\_014226  
NM\_152945  
NM\_002976  
NM\_006231  
NM\_014698  
NM\_014005  
NM\_017481  
NM\_001276385  
NM\_001315529,NM\_006031  
NM\_001010870,NM\_001168359  
NM\_001142556,NM\_001142557,NM\_012484,NM\_012485

NM\_182832  
NM\_033060  
NM\_001240  
NM\_178354  
NM\_003008  
NM\_001080850  
NM\_001004056,NM\_001004057,NM\_005307,NM\_182982  
NM\_001271783,NM\_001271784,NM\_018099  
NM\_007113  
NM\_001128620,NM\_002576  
NM\_201269  
NM\_152672  
NM\_006121  
NM\_001013843,NM\_024755  
NM\_001126057,NM\_001126058,NM\_001190348,NM\_001190349,NM\_033317  
NM\_033188  
NM\_001316951,NM\_018559  
NM\_001001480  
NM\_001271  
NM\_030785  
NM\_021076  
NM\_001321859,NM\_001321860,NM\_001321861,NM\_001321862,NM\_001321863,NM\_001321904,NM\_020  
NM\_014729  
NM\_001003407,NM\_001003408,NM\_001322882,NM\_001322883,NM\_001322884,NM\_001322885,NM\_001  
NM\_001003407,NM\_001003408,NM\_001322882,NM\_001322883,NM\_001322884,NM\_001322885,NM\_001  
NM\_003683,NM\_003683  
NM\_003108,NM\_003108  
NM\_003683  
NM\_003108  
NM\_001258374,NM\_001258375,NM\_001258376,NM\_021235,NM\_001258374,NM\_001258375,NM\_001258  
NM\_001271866,NM\_001271867,NM\_001271868,NM\_001516,NM\_001271866,NM\_001271867,NM\_001271  
NM\_001318842,NM\_001318847,NM\_001318848,NM\_001318857,NM\_001318858,NM\_006586,NM\_001318  
NM\_001258374,NM\_001258375,NM\_001258376,NM\_021235  
NM\_001318842,NM\_001318847,NM\_001318848,NM\_001318857,NM\_001318858,NM\_006586  
NM\_001271866,NM\_001271867,NM\_001271868,NM\_001516  
NM\_001023563,NM\_001023563  
NM\_003012,NM\_003012  
NM\_001099218,NM\_001321233,NM\_001099218,NM\_001321233  
NM\_004065,NM\_004065  
NM\_001199160,NM\_001199161,NM\_001199162,NM\_006677,NM\_001199160,NM\_001199161,NM\_001199  
NM\_001304562,NM\_001304563,NM\_173618,NM\_001304562,NM\_001304563,NM\_173618  
NM\_001130110,NM\_015559,NM\_001130110,NM\_015559  
NM\_003012  
NM\_004065  
NM\_001099218,NM\_001321233  
NM\_001199160,NM\_001199161,NM\_001199162,NM\_006677  
NM\_001023563

NM\_001130110,NM\_015559  
NM\_001304562,NM\_001304563,NM\_173618  
NM\_022454,NM\_022454  
NM\_015656,NM\_015656  
NM\_015656,NM\_015656  
NM\_001080826,NM\_001080826  
NM\_000552,NM\_000552  
NM\_001130110,NM\_015559,NM\_001130110,NM\_015559  
NM\_022454  
NM\_000552  
NM\_015656  
NM\_001080826  
NM\_001130110,NM\_015559  
NM\_198148,NM\_198148  
NM\_006015,NM\_139135,NM\_006015,NM\_139135  
NM\_000552,NM\_000552  
NM\_006248,NM\_006248  
NM\_001130110,NM\_015559,NM\_001130110,NM\_015559  
NM\_001038640,NM\_001038640  
NM\_001317012,NM\_001317019,NM\_022482,NM\_001317012,NM\_001317019,NM\_022482  
NM\_006015,NM\_139135  
NM\_000552  
NM\_198148  
NM\_006248  
NM\_001038640  
NM\_001130110,NM\_015559  
NM\_001317012,NM\_001317019,NM\_022482  
NM\_014246,NM\_014246  
NM\_001017395,NM\_001128224,NM\_001017395,NM\_001128224  
NM\_006015,NM\_139135,NM\_006015,NM\_139135  
NM\_000552,NM\_000552  
NM\_001038640,NM\_001038640  
NM\_018416,NM\_018416  
NM\_207371,NM\_207371  
NM\_006015,NM\_139135  
NM\_000552  
NM\_014246  
NM\_001017395,NM\_001128224  
NM\_001038640  
NM\_018416  
NM\_207371  
NM\_006080,NM\_006080  
NM\_001244249,NM\_001641,NM\_080648,NM\_080649,NM\_001244249,NM\_001641,NM\_080648,NM\_080649  
NM\_004933,NM\_004933  
NM\_006080  
NM\_004933  
NM\_001244249,NM\_001641,NM\_080648,NM\_080649

NM\_000268,NM\_016418,NM\_181825,NM\_181828,NM\_181829,NM\_181830,NM\_181831,NM\_181832,NM\_001009608,NM\_001009608  
NM\_001304562,NM\_173618,NM\_001304562,NM\_173618  
NM\_001009608  
NM\_001304562,NM\_173618  
NM\_000268,NM\_016418,NM\_181825,NM\_181828,NM\_181829,NM\_181830,NM\_181831,NM\_181832  
NM\_014639,NM\_014639  
NM\_021021,NM\_021021  
NM\_017481,NM\_017481  
NM\_033068,NM\_033068  
NM\_015306,NM\_015306  
NM\_014639  
NM\_033068  
NM\_015306  
NM\_021021  
NM\_017481  
NM\_001291980,NM\_002011,NM\_022963,NM\_213647,NM\_001291980,NM\_002011,NM\_022963,NM\_213647  
NM\_001286581,NM\_001286582,NM\_001286583,NM\_020901,NM\_001286581,NM\_001286582,NM\_001286583  
NM\_020528,NM\_020528  
NM\_183373,NM\_183373  
NM\_006248,NM\_006248  
NM\_001286581,NM\_001286582,NM\_001286583,NM\_020901  
NM\_020528  
NM\_001291980,NM\_002011,NM\_022963,NM\_213647  
NM\_183373  
NM\_006248  
NM\_001170690,NM\_001170690  
NM\_001142319,NM\_001142319  
NM\_198834,NM\_198836,NM\_198837,NM\_198838,NM\_198839,NM\_198834,NM\_198836,NM\_198837,NM\_000548,NM\_001077183,NM\_001114382,NM\_001318827,NM\_001318829,NM\_001318831,NM\_001318833  
NM\_012079,NM\_012079  
NM\_138348,NM\_138348  
NM\_001007471,NM\_020952,NM\_024971,NM\_206944,NM\_206945,NM\_206946,NM\_206947,NM\_001007471  
NM\_012079  
NM\_025203  
NM\_001170690  
NM\_000548,NM\_001077183,NM\_001114382,NM\_001318827,NM\_001318829,NM\_001318831,NM\_001318833  
NM\_138348  
NM\_001007471,NM\_020952,NM\_024971,NM\_206944,NM\_206945,NM\_206946,NM\_206947  
NM\_198834,NM\_198836,NM\_198837,NM\_198838,NM\_198839  
NM\_001098407,NM\_001127212,NM\_001472,NM\_012196,NM\_001098407,NM\_001127212,NM\_001472,NM\_001173984,NM\_013263,NM\_001173984,NM\_013263  
NM\_000268,NM\_016418,NM\_181825,NM\_181828,NM\_181829,NM\_181830,NM\_181831,NM\_181832,NM\_001278629,NM\_001278630,NM\_152786,NM\_001278629,NM\_001278630,NM\_152786  
NM\_152414,NM\_152414  
NM\_001173984,NM\_013263  
NM\_001098407,NM\_001127212,NM\_001472,NM\_012196

NM\_152414  
NM\_000268,NM\_016418,NM\_181825,NM\_181828,NM\_181829,NM\_181830,NM\_181831,NM\_181832  
NM\_001278629,NM\_001278630,NM\_152786  
NM\_174922,NM\_174922  
NM\_001114380,NM\_002209,NM\_001114380,NM\_002209  
NM\_198963,NM\_198963  
NM\_006248,NM\_006248  
NM\_001297439,NM\_001528,NM\_001297439,NM\_001528  
NM\_001305424,NM\_020066,NM\_001305424,NM\_020066  
NM\_174922  
NM\_198963  
NM\_001114380,NM\_002209  
NM\_001297439,NM\_001528  
NM\_001305424,NM\_020066  
NM\_006248  
NM\_006768,NM\_006768  
NM\_001080396,NM\_001080396  
NM\_001080396  
NM\_006768  
NM\_033071,NM\_182961,NM\_033071,NM\_182961  
NM\_001098407,NM\_001127212,NM\_001472,NM\_012196,NM\_001098407,NM\_001127212,NM\_001472,NM  
NM\_001098407,NM\_001127212,NM\_001472,NM\_012196  
NM\_033071,NM\_182961  
NM\_001290224,NM\_199259,NM\_199260,NM\_199261,NM\_001290224,NM\_199259,NM\_199260,NM\_199261  
NM\_001098407,NM\_001127212,NM\_001472,NM\_012196,NM\_001098407,NM\_001127212,NM\_001472,NM  
NM\_001290224,NM\_199259,NM\_199260,NM\_199261  
NM\_001098407,NM\_001127212,NM\_001472,NM\_012196  
NM\_001098515,NM\_145015,NM\_001098515,NM\_145015  
NM\_004599,NM\_004599  
NM\_001098515,NM\_145015  
NM\_004599  
NM\_031303,NM\_031303  
NM\_005148,NM\_054035,NM\_005148,NM\_054035  
NM\_001256486,NM\_001256487,NM\_001256488,NM\_004487,NM\_001256486,NM\_001256487,NM\_001256  
NM\_031303  
NM\_005148,NM\_054035  
NM\_001256486,NM\_001256487,NM\_001256488,NM\_004487  
NM\_001098627,NM\_001098629,NM\_001098630,NM\_032643,NM\_001098627,NM\_001098629,NM\_001098  
NM\_001098627,NM\_001098629,NM\_001098630,NM\_032643  
NM\_001204087,NM\_002249  
NM\_001080458,NM\_001080458  
NM\_001080434,NM\_001080434  
NM\_032853,NM\_032853  
NM\_001009609,NM\_001009609  
NM\_173493,NM\_173493  
NM\_001962,NM\_001962  
NM\_001080458

NM\_173493  
NM\_001080434  
NM\_001962  
NM\_032853  
NM\_001009609  
NM\_014109,NM\_014109  
NM\_014674,NM\_014674  
NM\_001321196,NM\_012254,NM\_001321196,NM\_012254  
NM\_001172698,NM\_001172699,NM\_133263,NM\_001172698,NM\_001172699,NM\_133263  
NM\_015711,NM\_015711  
NM\_001112808,NM\_015978,NM\_001112808,NM\_015978  
NM\_001184808,NM\_001242614,NM\_031462,NM\_001184808,NM\_001242614,NM\_031462  
NM\_014729,NM\_014729  
NM\_001112808,NM\_015978  
NM\_014109  
NM\_015711  
NM\_001321196,NM\_012254  
NM\_014674  
NM\_001172698,NM\_001172699,NM\_133263  
NM\_001184808,NM\_001242614,NM\_031462  
NM\_014729  
NM\_000268,NM\_016418,NM\_181825,NM\_181828,NM\_181829,NM\_181830,NM\_181831,NM\_181832,NM\_001077206,NM\_001077207,NM\_001077208,NM\_001191049,NM\_001300744,NM\_001300745,NM\_001145804,NM\_145804  
NM\_001243403,NM\_001243403  
NM\_001318015,NM\_001318023,NM\_032799,NM\_001318015,NM\_001318023,NM\_032799  
NM\_015016,NM\_015016  
NM\_016107,NM\_016107  
NM\_001318015,NM\_001318023,NM\_032799  
NM\_001077206,NM\_001077207,NM\_001077208,NM\_001191049,NM\_001300744,NM\_001300745,NM\_001001243403  
NM\_015016  
NM\_145804  
NM\_000268,NM\_016418,NM\_181825,NM\_181828,NM\_181829,NM\_181830,NM\_181831,NM\_181832  
NM\_016107  
NM\_012168,NM\_012168  
NM\_006887,NM\_006887  
NM\_001286074,NM\_004606,NM\_138923,NM\_001286074,NM\_004606,NM\_138923  
NM\_001142864,NM\_001142864  
NM\_012168  
NM\_006887  
NM\_001286074,NM\_004606,NM\_138923  
NM\_006981,NM\_173199,NM\_173200  
NM\_001142864  
NM\_001017395,NM\_001128224,NM\_001017395,NM\_001128224  
NM\_001173984,NM\_013263,NM\_001173984,NM\_013263  
NM\_001103146,NM\_001103147,NM\_001103148,NM\_015575,NM\_001103146,NM\_001103147,NM\_001103



NM\_000332,NM\_001128164,NM\_000332,NM\_001128164  
NM\_001145444,NM\_001145445,NM\_020706,NM\_001145444,NM\_001145445,NM\_020706  
NM\_001173984,NM\_013263  
NM\_001017395,NM\_001128224  
NM\_001103146,NM\_001103147,NM\_001103148,NM\_015575  
NM\_001145444,NM\_001145445,NM\_020706  
NM\_000332,NM\_001128164  
NM\_015848,NM\_015848  
NM\_001173984,NM\_013263,NM\_001173984,NM\_013263  
NM\_001005735,NM\_001257387,NM\_007194,NM\_145862,NM\_001005735,NM\_001257387,NM\_007194,NM  
NM\_000332,NM\_001128164,NM\_000332,NM\_001128164  
NM\_001080396,NM\_001080396  
NM\_001145444,NM\_001145445,NM\_020706,NM\_001145444,NM\_001145445,NM\_020706  
NM\_001127708,NM\_001127709,NM\_001127710,NM\_001303232,NM\_005807,NM\_001127708,NM\_001127  
NM\_001164766,NM\_006885,NM\_001164766,NM\_006885  
NM\_015848  
NM\_001173984,NM\_013263  
NM\_001005735,NM\_001257387,NM\_007194,NM\_145862  
NM\_001145444,NM\_001145445,NM\_020706  
NM\_001164766,NM\_006885  
NM\_001127708,NM\_001127709,NM\_001127710,NM\_001303232,NM\_005807  
NM\_001080396  
NM\_001136002  
NM\_000332,NM\_001128164  
NM\_001284291,NM\_024814,NM\_001284291,NM\_024814  
NM\_003038,NM\_003038  
NM\_153757,NM\_153757  
NM\_001284291,NM\_024814  
NM\_003038  
NM\_153757  
NM\_001243799,NM\_183422  
NM\_032142,NM\_032142  
NM\_001142730,NM\_001142730  
NM\_032142  
NM\_001142730  
NM\_001243799,NM\_183422  
NM\_001100397,NM\_001282899,NM\_001282900,NM\_001282901,NM\_007023,NM\_001100397,NM\_001282  
NM\_002786,NM\_148976,NM\_002786,NM\_148976  
NM\_004585,NM\_004585  
NM\_001204087,NM\_002249,NM\_170782,NM\_001204087,NM\_002249,NM\_170782  
NM\_138426,NM\_138426  
NM\_021614,NM\_021614  
NM\_006248,NM\_006248  
NM\_001166018,NM\_007252,NM\_001166018,NM\_007252  
NM\_021614  
NM\_004585  
NM\_001100397,NM\_001282899,NM\_001282900,NM\_001282901,NM\_007023

NM\_001204087,NM\_002249,NM\_170782  
NM\_002786,NM\_148976  
NM\_138426  
NM\_001166018,NM\_007252  
NM\_006248  
NM\_001136046,NM\_032265,NM\_001136046,NM\_032265  
NM\_014345,NM\_014345  
NM\_001100397,NM\_001282899,NM\_001282900,NM\_001282901,NM\_007023,NM\_001100397,NM\_001282  
NM\_001164211,NM\_001164213,NM\_015116,NM\_001164211,NM\_001164213,NM\_015116  
NM\_080473,NM\_080473  
NM\_001287489,NM\_194248,NM\_001287489,NM\_194248  
NM\_007349,NM\_007349  
NM\_020747,NM\_020747  
NM\_006248,NM\_006248  
NM\_014345  
NM\_001100397,NM\_001282899,NM\_001282900,NM\_001282901,NM\_007023  
NM\_001136046,NM\_001267822,NM\_032265  
NM\_001164211,NM\_001164213,NM\_015116  
NM\_080473  
NM\_001287489,NM\_194248  
NM\_020747  
NM\_007349  
NM\_006248  
NM\_001136002  
NM\_144505,NM\_144505  
NM\_000051,NM\_000051  
NM\_001276343,NM\_133446,NM\_001276343,NM\_133446  
NM\_001098407,NM\_001127212,NM\_001472,NM\_012196,NM\_001098407,NM\_001127212,NM\_001472,NM  
NM\_001242680,NM\_001242680  
NM\_207371,NM\_207371  
NM\_001276343,NM\_133446  
NM\_007196  
NM\_001242680  
NM\_000051  
NM\_001098407,NM\_001127212,NM\_001472,NM\_012196  
NM\_207371  
NM\_015134,NM\_201274,NM\_015134,NM\_201274  
NM\_000051,NM\_000051  
NM\_178448,NM\_178448  
NM\_004104,NM\_004104  
NM\_177424,NM\_177424  
NM\_053284,NM\_053284  
NM\_001242680,NM\_001242680  
NM\_015134,NM\_201274  
NM\_177424  
NM\_178448  
NM\_001242680

NM\_000051  
NM\_004104  
NM\_001301043,NM\_001301044,NM\_014333  
NM\_053284  
NM\_001018159,NM\_001018160,NM\_001286500,NM\_003905,NM\_001018159,NM\_001018160,NM\_001286  
NM\_080863,NM\_080863  
NM\_002867,NM\_002867  
NM\_001267716,NM\_001267716  
NM\_080863  
NM\_001018159,NM\_001018160,NM\_001286500,NM\_003905  
NM\_001267716  
NM\_002867  
NM\_198827,NM\_198827  
NM\_001018159,NM\_001018160,NM\_001286500,NM\_003905,NM\_001018159,NM\_001018160,NM\_001286  
NM\_001320780,NM\_001320780  
NM\_001199629,NM\_002475,NM\_001199629,NM\_002475  
NM\_198827  
NM\_001199629,NM\_002475  
NM\_001018159,NM\_001018160,NM\_001286500,NM\_003905  
NM\_001320780  
NM\_001018159,NM\_001018160,NM\_001286500,NM\_003905,NM\_001018159,NM\_001018160,NM\_001286  
NM\_001282541,NM\_001282542,NM\_003176,NM\_001282541,NM\_001282542,NM\_003176  
NM\_001127493,NM\_001148,NM\_020977,NM\_001127493,NM\_001148,NM\_020977  
NM\_018902,NM\_031861,NM\_018902,NM\_031861  
NM\_001081676,NM\_001081677,NM\_006922,NM\_001081676,NM\_001081677,NM\_006922  
NM\_001282541,NM\_001282542,NM\_003176  
NM\_001018159,NM\_001018160,NM\_001286500,NM\_003905  
NM\_018902,NM\_031861  
NM\_001127493,NM\_001148,NM\_020977  
NM\_001081676,NM\_001081677,NM\_006922  
NM\_001018159,NM\_001018160,NM\_001286500,NM\_003905,NM\_001018159,NM\_001018160,NM\_001286  
NM\_024867,NM\_024867  
NM\_003565,NM\_003565  
NM\_002635,NM\_005888,NM\_213611,NM\_002635,NM\_005888,NM\_213611  
NM\_001291366,NM\_001291367,NM\_001291366,NM\_001291367  
NM\_001256071,NM\_001256071  
NM\_001127493,NM\_001148,NM\_020977,NM\_001127493,NM\_001148,NM\_020977  
NM\_001291965,NM\_006646,NM\_001291965,NM\_006646  
NM\_004621,NM\_004621  
NM\_001199237,NM\_001199238,NM\_001199239,NM\_001199240,NM\_033177,NM\_001199237,NM\_001199  
NM\_001040153,NM\_001242868,NM\_001242869,NM\_001242870,NM\_001242871,NM\_144595,NM\_001040  
NM\_001291366,NM\_001291367  
NM\_024867  
NM\_003565  
NM\_001018159,NM\_001018160,NM\_001286500,NM\_003905  
NM\_001040153,NM\_001242868,NM\_001242869,NM\_001242870,NM\_001242871,NM\_144595  
NM\_004621

NM\_002635,NM\_005888,NM\_213611  
NM\_001199237,NM\_001199238,NM\_001199239,NM\_001199240,NM\_033177  
NM\_001256071  
NM\_001127493,NM\_001148,NM\_020977  
NM\_001291965,NM\_006646  
NM\_001304482,NM\_015466,NM\_001304482,NM\_015466  
NM\_000268,NM\_016418,NM\_181825,NM\_181832,NM\_181833,NM\_000268,NM\_016418,NM\_181825,NM\_020780,NM\_020780  
NM\_001522,NM\_001522  
NM\_144633,NM\_144633  
NM\_000268,NM\_016418,NM\_181825,NM\_181832,NM\_181833  
NM\_001304482,NM\_015466  
NM\_020780  
NM\_001522  
NM\_144633  
NM\_175885,NM\_175885  
NM\_000268,NM\_016418,NM\_181825,NM\_181832,NM\_181833,NM\_000268,NM\_016418,NM\_181825,NM\_001100122,NM\_014963,NM\_001100122,NM\_014963  
NM\_004656,NM\_004656  
NM\_001522,NM\_001522  
NM\_148894,NM\_148894  
NM\_004455,NM\_004455  
NM\_148894  
NM\_000268,NM\_016418,NM\_181825,NM\_181832,NM\_181833  
NM\_004455  
NM\_001522  
NM\_004656  
NM\_175885  
NM\_001100122,NM\_014963  
NM\_001105521,NM\_001323086,NM\_001323087,NM\_001323088,NM\_001323090,NM\_001105521,NM\_00100268,NM\_016418,NM\_181825,NM\_181832,NM\_181833,NM\_000268,NM\_016418,NM\_181825,NM\_004656,NM\_004656  
NM\_001522,NM\_001522  
NM\_148894,NM\_148894  
NM\_173587,NM\_173587  
NM\_138983,NM\_138983  
NM\_001145207,NM\_001145207  
NM\_003487,NM\_139215,NM\_003487,NM\_139215  
NM\_148894  
NM\_000268,NM\_016418,NM\_181825,NM\_181832,NM\_181833  
NM\_001522  
NM\_004656  
NM\_001145207  
NM\_001105521,NM\_001323086,NM\_001323087,NM\_001323088,NM\_001323090  
NM\_138983  
NM\_173587  
NM\_003487,NM\_139215

NM\_000268,NM\_016418,NM\_181825,NM\_181832,NM\_181833,NM\_000268,NM\_016418,NM\_181825,NM\_001522,NM\_001522  
NM\_148894,NM\_148894  
NM\_148894  
NM\_000268,NM\_016418,NM\_181825,NM\_181832,NM\_181833  
NM\_001522  
NM\_145912,NM\_145912  
NM\_001308174,NM\_138790,NM\_001308174,NM\_138790  
NM\_000268,NM\_016418,NM\_181825,NM\_181832,NM\_181833,NM\_000268,NM\_016418,NM\_181825,NM\_030975,NM\_030975  
NM\_004656,NM\_004656  
NM\_001039792,NM\_001039792  
NM\_001522,NM\_001522  
NM\_148894,NM\_148894  
NM\_001159651,NM\_138369,NM\_001159651,NM\_138369  
NM\_148894  
NM\_000268,NM\_016418,NM\_181825,NM\_181832,NM\_181833  
NM\_145912  
NM\_001522  
NM\_001308174,NM\_138790  
NM\_004656  
NM\_001039792  
NM\_030975  
NM\_001159651,NM\_138369  
NM\_152424,NM\_152424  
NM\_001271604,NM\_001271604  
NM\_001195573,NM\_001271282,NM\_001291628,NM\_030621,NM\_177438,NM\_001195573,NM\_001271282  
NM\_007261,NM\_007261  
NM\_001282301,NM\_001282301  
NM\_001271604  
NM\_152424  
NM\_007261  
NM\_001195573,NM\_001271282,NM\_001291628,NM\_030621,NM\_177438  
NM\_001282301  
NM\_012168,NM\_012168  
NM\_012168  
NM\_001083585,NM\_001291581,NM\_004703,NM\_001083585,NM\_001291581,NM\_004703  
NM\_001083585,NM\_001291581,NM\_004703  
NM\_001164463,NM\_005054,NM\_182588,NM\_001164463,NM\_005054,NM\_182588  
NM\_006678,NM\_006678  
NM\_006039,NM\_006039  
NM\_023919,NM\_023919  
NM\_021076,NM\_021076  
NM\_182588,NM\_182588  
NM\_006678  
NM\_023919  
NM\_001164463,NM\_005054

NM\_182588  
NM\_006039  
NM\_021076  
NM\_002439,NM\_002439  
NM\_002439  
NM\_006387  
NM\_001304388  
ENST00000361681  
ENST00000441802,ENST00000509647  
ENST00000361567  
ENST00000346061,ENST00000418749  
ENST00000278882,ENST00000358464,ENST00000439954  
ENST00000262189,ENST00000355193,ENST00000558084  
ENST00000348028,ENST00000349350,ENST00000421100,ENST00000427578,ENST00000443370,ENST00000:  
ENST00000361789  
ENST00000361567  
ENST00000361567  
ENST00000299440,ENST00000534663  
ENST00000367482,ENST00000367483,ENST00000367484,ENST00000367485,ENST00000367486,ENST00000:  
ENST00000361567  
ENST00000367483,ENST00000367484,ENST00000367485,ENST00000367486,ENST00000445192  
ENST00000389484  
ENST00000356920,ENST00000357462,ENST00000358087,ENST00000360967,ENST00000361163,ENST00000:  
ENST00000367482,ENST00000367483,ENST00000367484,ENST00000367485,ENST00000367486,ENST00000:  
ENST00000302763,ENST00000355078,ENST00000518825,ENST00000518910,ENST00000520158  
ENST00000357462,ENST00000360967,ENST00000361163,ENST00000409914  
ENST00000262189,ENST00000355193,ENST00000424877  
ENST00000299440,ENST00000299440,ENST00000534663,ENST00000534663  
ENST00000361567  
ENST00000361789  
ENST00000356920,ENST00000356920,ENST00000356920,ENST00000356920,ENST00000356920,ENST00000:  
ENST00000361567  
ENST00000361567  
ENST00000389484  
ENST00000441802,ENST00000441802,ENST00000509647,ENST00000509647  
ENST00000361567  
ENST00000278882,ENST00000278882,ENST00000278882,ENST00000358464,ENST00000358464,ENST00000:  
ENST00000361681  
ENST00000348028,ENST00000348028,ENST00000348028,ENST00000348028,ENST00000348028,ENST00000:  
ENST00000367482,ENST00000367482,ENST00000367482,ENST00000367482,ENST00000367482,ENST00000:  
ENST00000346061,ENST00000346061,ENST00000418749,ENST00000418749  
ENST00000302763,ENST00000302763,ENST00000302763,ENST00000302763,ENST00000302763,ENST00000:  
ENST00000262189,ENST00000262189,ENST00000262189,ENST00000355193,ENST00000355193,ENST00000:  
ENST00000357462,ENST00000357462,ENST00000357462,ENST00000357462,ENST00000360967,ENST00000:  
ENST00000367483,ENST00000367483,ENST00000367483,ENST00000367483,ENST00000367483,ENST00000:  
ENST00000367482,ENST00000367482,ENST00000367482,ENST00000367482,ENST00000367482,ENST00000:  
ENST00000262189,ENST00000262189,ENST00000262189,ENST00000355193,ENST00000355193,ENST00000:

ENST00000361681  
ENST00000441802,ENST00000509647  
ENST00000357462,ENST00000360967,ENST00000361163,ENST00000409914  
ENST00000361789  
ENST00000361567  
ENST00000346061,ENST00000418749  
ENST00000278882,ENST00000358464,ENST00000439954  
ENST00000361899  
ENST00000262189,ENST00000355193,ENST00000558084  
ENST00000348028,ENST00000349350,ENST00000421100,ENST00000427578,ENST00000443370,ENST00000  
ENST00000361789  
ENST00000361567  
ENST00000361567  
ENST00000299440,ENST00000534663  
ENST00000349310,ENST00000402615,ENST00000407796,ENST00000554581,ENST00000554848,ENST00000  
ENST00000367482,ENST00000367483,ENST00000367484,ENST00000367485,ENST00000367486,ENST00000  
ENST00000361567  
ENST00000367483,ENST00000367484,ENST00000367485,ENST00000367486,ENST00000445192  
ENST00000389484  
ENST00000361624  
ENST00000356920,ENST00000357462,ENST00000358087,ENST00000360967,ENST00000361163,ENST00000  
ENST00000367482,ENST00000367483,ENST00000367484,ENST00000367485,ENST00000367486,ENST00000  
ENST00000302763,ENST00000355078,ENST00000518825,ENST00000518910,ENST00000520158  
ENST00000357462,ENST00000360967,ENST00000361163,ENST00000409914  
ENST00000262189,ENST00000355193,ENST00000424877  
ENST00000299440,ENST00000299440,ENST00000534663,ENST00000534663  
ENST00000361899  
ENST00000349310,ENST00000349310,ENST00000349310,ENST00000349310,ENST00000349310,ENST00000  
ENST00000361567  
ENST00000361789  
ENST00000356920,ENST00000356920,ENST00000356920,ENST00000356920,ENST00000356920,ENST00000  
ENST00000357462,ENST00000357462,ENST00000357462,ENST00000357462,ENST00000357462,ENST00000  
ENST00000361567  
ENST00000361567  
ENST00000389484  
ENST00000361789  
ENST00000441802,ENST00000441802,ENST00000509647,ENST00000509647  
ENST00000361567  
ENST00000278882,ENST00000278882,ENST00000278882,ENST00000358464,ENST00000358464,ENST00000  
ENST00000361681  
ENST00000348028,ENST00000348028,ENST00000348028,ENST00000348028,ENST00000348028,ENST00000  
ENST00000367482,ENST00000367482,ENST00000367482,ENST00000367482,ENST00000367482,ENST00000  
ENST00000346061,ENST00000346061,ENST00000418749,ENST00000418749  
ENST00000302763,ENST00000302763,ENST00000302763,ENST00000302763,ENST00000302763,ENST00000  
ENST00000262189,ENST00000262189,ENST00000262189,ENST00000355193,ENST00000355193,ENST00000  
ENST00000357462,ENST00000357462,ENST00000357462,ENST00000357462,ENST00000360967,ENST00000  
ENST00000357462,ENST00000357462,ENST00000357462,ENST00000357462,ENST00000357462,ENST00000

ENST00000361624  
ENST00000367483,ENST00000367483,ENST00000367483,ENST00000367483,ENST00000367483,ENST00000:  
ENST00000367482,ENST00000367482,ENST00000367482,ENST00000367482,ENST00000367482,ENST00000:  
ENST00000262189,ENST00000262189,ENST00000262189,ENST00000355193,ENST00000355193,ENST00000:  
ENST00000281815,ENST00000338347  
ENST00000342960,ENST00000369338,ENST00000369339,ENST00000490598  
ENST00000407877,ENST00000542587,ENST00000586703  
ENST00000355086,ENST00000357825,ENST00000543397  
ENST00000439954  
ENST00000342960,ENST00000490598  
ENST00000346061,ENST00000418749  
ENST00000420699,ENST00000461153  
ENST00000281815,ENST00000338347  
ENST00000263093,ENST00000601355  
ENST00000425945  
ENST00000278882,ENST00000358464,ENST00000439954  
ENST00000358984,ENST00000447268,ENST00000580206  
ENST00000376767  
ENST00000490686  
ENST00000220959,ENST00000520539,ENST00000521922  
ENST00000310816,ENST00000359221,ENST00000361569,ENST00000395161,ENST00000503911,ENST00000:  
ENST00000439326  
ENST00000300134,ENST00000454075,ENST00000537215,ENST00000538913,ENST00000543873,ENST00000:  
ENST00000376223,ENST00000430996  
ENST00000367500,ENST00000367501  
ENST00000299798  
ENST00000358970  
ENST00000328886,ENST00000538566  
ENST00000334984,ENST00000349384,ENST00000379933,ENST00000379938,ENST00000483150  
ENST00000283507,ENST00000366832  
ENST00000368799  
ENST00000355867,ENST00000375398,ENST00000375400,ENST00000535393,ENST00000538146  
ENST00000281815,ENST00000338347  
ENST00000389793,ENST00000389794  
ENST00000350908,ENST00000360232,ENST00000390668,ENST00000393489,ENST00000393491,ENST00000:  
ENST00000408960  
ENST00000358970,ENST00000511306  
ENST00000368799  
ENST00000258729  
ENST00000342960  
ENST00000300061  
ENST00000340446  
ENST00000489525  
ENST00000510045  
ENST00000355014,ENST00000368282,ENST00000368284,ENST00000368285,ENST00000368286  
ENST00000336930,ENST00000529015  
ENST00000265368,ENST00000341594,ENST00000356820,ENST00000367255,ENST00000423061,ENST00000:



ENST00000328070  
ENST00000389362  
ENST00000391413  
ENST00000244769,ENST00000436367  
ENST00000333891,ENST00000423517  
ENST00000355014,ENST00000355014,ENST00000355014,ENST00000355014,ENST00000355014,ENST00000:  
ENST00000358970,ENST00000358970,ENST00000511306,ENST00000511306  
ENST00000350908,ENST00000350908,ENST00000350908,ENST00000350908,ENST00000350908,ENST00000:  
ENST00000490686  
ENST00000281815,ENST00000281815,ENST00000338347,ENST00000338347  
ENST00000510045  
ENST00000489525  
ENST00000300134,ENST00000300134,ENST00000300134,ENST00000300134,ENST00000300134,ENST00000:  
ENST00000355086,ENST00000355086,ENST00000355086,ENST00000357825,ENST00000357825,ENST00000:  
ENST00000407877,ENST00000407877,ENST00000407877,ENST00000542587,ENST00000542587,ENST00000:  
ENST00000367500,ENST00000367500,ENST00000367501,ENST00000367501  
ENST00000439954  
ENST00000220959,ENST00000220959,ENST00000220959,ENST00000520539,ENST00000520539,ENST00000:  
ENST00000310816,ENST00000310816,ENST00000310816,ENST00000310816,ENST00000310816,ENST00000:  
ENST00000425945  
ENST00000300061  
ENST00000418749  
ENST00000376223,ENST00000376223,ENST00000430996,ENST00000430996  
ENST00000408960  
ENST00000336930,ENST00000336930,ENST00000529015,ENST00000529015  
ENST00000278882,ENST00000278882,ENST00000278882,ENST00000358464,ENST00000358464,ENST00000:  
ENST00000281815,ENST00000281815,ENST00000338347,ENST00000338347  
ENST00000439326  
ENST00000358970  
ENST00000358970  
ENST00000258729  
ENST00000389793,ENST00000389793,ENST00000389794,ENST00000389794  
ENST00000299798  
ENST00000265368,ENST00000265368,ENST00000265368,ENST00000265368,ENST00000265368,ENST00000:  
ENST00000376767  
ENST00000340446  
ENST00000334984,ENST00000334984,ENST00000334984,ENST00000334984,ENST00000334984,ENST00000:  
ENST00000342960,ENST00000342960,ENST00000342960,ENST00000342960,ENST00000369338,ENST00000:  
ENST00000281815,ENST00000281815,ENST00000338347,ENST00000338347  
ENST00000358984,ENST00000358984,ENST00000358984,ENST00000447268,ENST00000447268,ENST00000:  
ENST00000368799  
ENST00000368799  
ENST00000342960,ENST00000342960,ENST00000490598,ENST00000490598  
ENST00000391413  
ENST00000328886,ENST00000328886,ENST00000538566,ENST00000538566  
ENST00000355867,ENST00000355867,ENST00000355867,ENST00000355867,ENST00000355867,ENST00000:  
ENST00000328070

ENST00000420699,ENST00000420699,ENST00000461153,ENST00000461153  
ENST00000263093,ENST00000263093,ENST00000601355,ENST00000601355  
ENST00000342960  
ENST00000389362  
ENST00000333891,ENST00000333891,ENST00000423517,ENST00000423517  
ENST00000283507,ENST00000283507,ENST00000366832,ENST00000366832  
ENST00000244769,ENST00000244769,ENST00000436367,ENST00000436367  
ENST00000281815,ENST00000338347  
ENST00000376322,ENST00000376327  
ENST00000407877,ENST00000542587,ENST00000586703  
ENST00000307886,ENST00000528419  
ENST00000359999,ENST00000373629,ENST00000373631,ENST00000460253  
ENST00000283195  
ENST00000439954  
ENST00000342960,ENST00000490598  
ENST00000346061,ENST00000418749  
ENST00000312513,ENST00000580762,ENST00000582535  
ENST00000314191,ENST00000338368  
ENST00000281815,ENST00000338347  
ENST00000283195  
ENST00000263093,ENST00000601355  
ENST00000243052,ENST00000538346,ENST00000550620  
ENST00000275607,ENST00000395435,ENST00000395436,ENST00000413756,ENST00000413952,ENST00000  
ENST00000402038  
ENST00000260947,ENST00000449967  
ENST00000358984,ENST00000447268,ENST00000580206  
ENST00000557056  
ENST00000261883  
ENST00000376767  
ENST00000314367,ENST00000356521,ENST00000377400,ENST00000382447  
ENST00000355300,ENST00000557798,ENST00000561030  
ENST00000490686  
ENST00000301421,ENST00000326856,ENST00000416184,ENST00000596931,ENST00000598239,ENST00000  
ENST00000220959,ENST00000520539,ENST00000521922  
ENST00000310816,ENST00000359221,ENST00000361569,ENST00000395161,ENST00000503911,ENST00000  
ENST00000378802  
ENST00000271883,ENST00000368331,ENST00000437809  
ENST00000300134,ENST00000454075,ENST00000537215,ENST00000538913,ENST00000543873,ENST00000  
ENST00000441024  
ENST00000376223,ENST00000430996  
ENST00000367500,ENST00000367501  
ENST00000299798  
ENST00000328886,ENST00000538566  
ENST00000287008,ENST00000357517,ENST00000394536,ENST00000456271,ENST00000503492,ENST00000  
ENST00000278882,ENST00000358464,ENST00000439954  
ENST00000388820  
ENST00000353796,ENST00000396912

ENST00000225296  
ENST00000261716  
ENST00000371494  
ENST00000355867,ENST00000375398,ENST00000375400,ENST00000535393,ENST00000538146  
ENST00000273395,ENST00000355385,ENST00000495514  
ENST00000304833  
ENST00000350908,ENST00000360232,ENST00000390668,ENST00000393489,ENST00000393491,ENST00000:  
ENST00000255882,ENST00000572273  
ENST00000408960  
ENST00000509274  
ENST00000300061  
ENST00000340446  
ENST00000377833  
ENST00000301067  
ENST00000361381  
ENST00000262189,ENST00000355193,ENST00000558084  
ENST00000355014,ENST00000368282,ENST00000368284,ENST00000368285,ENST00000368286  
ENST00000336930,ENST00000529015  
ENST00000328070  
ENST00000389362  
ENST00000391413  
ENST00000397104  
ENST00000358491  
ENST00000376536  
ENST00000342175,ENST00000342992,ENST00000359218,ENST00000460472,ENST00000589042,ENST00000:  
ENST00000333891,ENST00000423517  
ENST00000355300,ENST00000355300,ENST00000355300,ENST00000557798,ENST00000557798,ENST00000:  
ENST00000355014,ENST00000355014,ENST00000355014,ENST00000355014,ENST00000355014,ENST00000:  
ENST00000255882,ENST00000255882,ENST00000572273,ENST00000572273  
ENST00000350908,ENST00000350908,ENST00000350908,ENST00000350908,ENST00000350908,ENST00000:  
ENST00000490686  
ENST00000281815,ENST00000281815,ENST00000338347,ENST00000338347  
ENST00000557056  
ENST00000262189,ENST00000262189,ENST00000262189,ENST00000355193,ENST00000355193,ENST00000:  
ENST00000300134,ENST00000300134,ENST00000300134,ENST00000300134,ENST00000300134,ENST00000:  
ENST00000358491  
ENST00000441024  
ENST00000261883  
ENST00000407877,ENST00000407877,ENST00000407877,ENST00000542587,ENST00000542587,ENST00000:  
ENST00000367500,ENST00000367500,ENST00000367501,ENST00000367501  
ENST00000439954  
ENST00000220959,ENST00000220959,ENST00000220959,ENST00000520539,ENST00000520539,ENST00000:  
ENST00000361381  
ENST00000359999,ENST00000359999,ENST00000359999,ENST00000359999,ENST00000373629,ENST00000:  
ENST00000225296  
ENST00000314191,ENST00000314191,ENST00000338368,ENST00000338368  
ENST00000342175,ENST00000342175,ENST00000342175,ENST00000342175,ENST00000342175,ENST00000:

ENST00000307886,ENST00000307886,ENST00000528419,ENST00000528419  
ENST00000314367,ENST00000314367,ENST00000314367,ENST00000314367,ENST00000356521,ENST00000:  
ENST00000283195  
ENST00000310816,ENST00000310816,ENST00000310816,ENST00000310816,ENST00000310816,ENST00000:  
ENST00000300061  
ENST00000418749  
ENST00000304833  
ENST00000377833  
ENST00000260947,ENST00000260947,ENST00000449967,ENST00000449967  
ENST00000376223,ENST00000376223,ENST00000430996,ENST00000430996  
ENST00000273395,ENST00000273395,ENST00000273395,ENST00000355385,ENST00000355385,ENST00000:  
ENST00000312513,ENST00000312513,ENST00000312513,ENST00000580762,ENST00000580762,ENST00000:  
ENST00000408960  
ENST00000388820  
ENST00000376322,ENST00000376322,ENST00000376327,ENST00000376327  
ENST00000301067  
ENST00000271883,ENST00000271883,ENST00000271883,ENST00000368331,ENST00000368331,ENST00000:  
ENST00000371494  
ENST00000336930,ENST00000336930,ENST00000529015,ENST00000529015  
ENST00000281815,ENST00000281815,ENST00000338347,ENST00000338347  
ENST00000402038  
ENST00000283195  
ENST00000326856,ENST00000326856,ENST00000326856,ENST00000596931,ENST00000596931,ENST00000:  
ENST00000243052,ENST00000243052,ENST00000243052,ENST00000538346,ENST00000538346,ENST00000:  
ENST00000299798  
ENST00000275607,ENST00000275607,ENST00000275607,ENST00000275607,ENST00000275607,ENST00000:  
ENST00000509274  
ENST00000376767  
ENST00000340446  
ENST00000353796,ENST00000353796,ENST00000396912,ENST00000396912  
ENST00000358984,ENST00000358984,ENST00000358984,ENST00000447268,ENST00000447268,ENST00000:  
ENST00000342960,ENST00000342960,ENST00000490598,ENST00000490598  
ENST00000536202  
ENST00000397104  
ENST00000391413  
ENST00000328886,ENST00000328886,ENST00000538566,ENST00000538566  
ENST00000287008,ENST00000287008,ENST00000287008,ENST00000287008,ENST00000287008,ENST00000:  
ENST00000355867,ENST00000355867,ENST00000355867,ENST00000355867,ENST00000355867,ENST00000:  
ENST00000328070  
ENST00000263093,ENST00000263093,ENST00000601355,ENST00000601355  
ENST00000278882,ENST00000278882,ENST00000278882,ENST00000358464,ENST00000358464,ENST00000:  
ENST00000378802  
ENST00000389362  
ENST00000333891,ENST00000333891,ENST00000423517,ENST00000423517  
ENST00000398531  
ENST00000328782  
ENST00000407877,ENST00000542587,ENST00000586703

ENST00000325823,ENST00000396410,ENST00000447912,ENST00000450288,ENST00000455313,ENST00000:  
ENST00000399703,ENST00000602295  
ENST00000263093,ENST00000601355  
ENST00000301310,ENST00000586929  
ENST00000490686  
ENST00000220959,ENST00000520539,ENST00000521922  
ENST00000310816,ENST00000359221,ENST00000361569,ENST00000395161,ENST00000503911,ENST00000:  
ENST00000300134,ENST00000454075,ENST00000537215,ENST00000538913,ENST00000543873,ENST00000:  
ENST00000376223,ENST00000430996  
ENST00000367500,ENST00000367501  
ENST00000299798  
ENST00000369226,ENST00000369228  
ENST00000328886,ENST00000538566  
ENST00000355867,ENST00000375398,ENST00000375400,ENST00000535393,ENST00000538146  
ENST00000350908,ENST00000360232,ENST00000390668,ENST00000393489,ENST00000393491,ENST00000:  
ENST00000408960  
ENST00000532254,ENST00000533640  
ENST00000300061  
ENST00000340446  
ENST00000348028,ENST00000349350,ENST00000421100,ENST00000427578,ENST00000443370,ENST00000:  
ENST00000391545  
ENST00000336930,ENST00000529015  
ENST00000328070  
ENST00000367482,ENST00000367483,ENST00000367484,ENST00000367485,ENST00000367486,ENST00000:  
ENST00000350908,ENST00000350908,ENST00000350908,ENST00000350908,ENST00000350908,ENST00000:  
ENST00000490686  
ENST00000399703,ENST00000399703,ENST00000602295,ENST00000602295  
ENST00000399703,ENST00000399703,ENST00000602295,ENST00000602295  
ENST00000532254,ENST00000532254,ENST00000533640,ENST00000533640  
ENST00000325823,ENST00000325823,ENST00000325823,ENST00000325823,ENST00000325823,ENST00000:  
ENST00000300134,ENST00000300134,ENST00000300134,ENST00000300134,ENST00000300134,ENST00000:  
ENST00000328782  
ENST00000407877,ENST00000407877,ENST00000407877,ENST00000542587,ENST00000542587,ENST00000:  
ENST00000367500,ENST00000367500,ENST00000367501,ENST00000367501  
ENST00000220959,ENST00000220959,ENST00000220959,ENST00000520539,ENST00000520539,ENST00000:  
ENST00000310816,ENST00000310816,ENST00000310816,ENST00000310816,ENST00000310816,ENST00000:  
ENST00000391545  
ENST00000300061  
ENST00000376223,ENST00000376223,ENST00000430996,ENST00000430996  
ENST00000369226,ENST00000369226,ENST00000369228,ENST00000369228  
ENST00000301310,ENST00000301310,ENST00000586929,ENST00000586929  
ENST00000408960  
ENST00000336930,ENST00000336930,ENST00000529015,ENST00000529015  
ENST00000299798  
ENST00000340446  
ENST00000328886,ENST00000328886,ENST00000538566,ENST00000538566  
ENST00000355867,ENST00000355867,ENST00000355867,ENST00000355867,ENST00000355867,ENST00000:

ENST00000328070  
ENST00000263093,ENST00000263093,ENST00000601355,ENST00000601355  
ENST00000348028,ENST00000348028,ENST00000348028,ENST00000348028,ENST00000348028,ENST00000:  
ENST00000367482,ENST00000367482,ENST00000367482,ENST00000367482,ENST00000367482,ENST00000:  
ENST00000304514,ENST00000409886  
ENST00000304514,ENST00000304514,ENST00000409886,ENST00000409886  
ENST00000226207  
ENST00000304514,ENST00000409886  
ENST00000226207  
ENST00000304514,ENST00000304514,ENST00000409886,ENST00000409886  
ENST00000304514,ENST00000409886  
ENST00000331920,ENST00000375274,ENST00000375290,ENST00000430669,ENST00000437951,ENST00000:  
ENST00000331920,ENST00000331920,ENST00000331920,ENST00000331920,ENST00000331920,ENST00000:  
ENST00000304514,ENST00000304514,ENST00000409886,ENST00000409886  
ENST00000263816  
ENST00000262189,ENST00000355193,ENST00000558665  
ENST00000262189,ENST00000262189,ENST00000262189,ENST00000355193,ENST00000355193,ENST00000:  
ENST00000263816  
ENST00000295956,ENST00000348383,ENST00000357272,ENST00000358537,ENST00000419752,ENST00000:  
ENST00000295956,ENST00000295956,ENST00000295956,ENST00000295956,ENST00000295956,ENST00000:  
ENST00000309988,ENST00000349807,ENST00000353004,ENST00000354078  
ENST00000374518  
ENST00000266000,ENST00000374542,ENST00000414083,ENST00000446403,ENST00000453407  
ENST00000346193  
ENST00000257017  
ENST00000254260,ENST00000400226  
ENST00000253435,ENST00000598265,ENST00000602198  
ENST00000281815,ENST00000338347  
ENST00000300113  
ENST00000355221,ENST00000359530,ENST00000396774,ENST00000520188  
ENST00000254260,ENST00000400226  
ENST00000370742,ENST00000401034  
ENST00000342960,ENST00000369338,ENST00000369339,ENST00000490598  
ENST00000342960,ENST00000490598  
ENST00000397910  
ENST00000372880  
ENST00000301607,ENST00000586740  
ENST00000267540,ENST00000555447  
ENST00000378491  
ENST00000397126  
ENST00000417435  
ENST00000343905  
ENST00000409757,ENST00000444368,ENST00000448507  
ENST00000293925,ENST00000397412,ENST00000436138  
ENST00000239938  
ENST00000311519,ENST00000333478,ENST00000421160,ENST00000447444,ENST00000541401  
ENST00000266079,ENST00000535781

ENST00000361193,ENST00000411502,ENST00000546047,ENST00000571215,ENST00000572725  
ENST00000374694  
ENST00000294724,ENST00000361302,ENST00000361522,ENST00000361915,ENST00000370161,ENST00000  
ENST00000303319,ENST00000422782,ENST00000428879  
ENST00000336119,ENST00000348069,ENST00000366496,ENST00000366497,ENST00000391827,ENST00000  
ENST00000300619,ENST00000397082  
ENST00000367796,ENST00000367797  
ENST00000388996,ENST00000519445,ENST00000521134  
ENST00000246006  
ENST00000308158,ENST00000323594,ENST00000510913  
ENST00000340027,ENST00000376071,ENST00000376072,ENST00000376073  
ENST00000269844,ENST00000398548,ENST00000422911,ENST00000433067,ENST00000447016,ENST00000  
ENST00000326637,ENST00000370891,ENST00000557284  
ENST00000306151,ENST00000379439  
ENST00000338608,ENST00000432063,ENST00000535545,ENST00000542951  
ENST00000361320  
ENST00000367662  
ENST00000269305,ENST00000359597,ENST00000413465,ENST00000420246,ENST00000445888,ENST00000  
ENST00000281815,ENST00000338347  
ENST00000306151,ENST00000379439  
ENST00000334197,ENST00000452676,ENST00000601469  
ENST00000367549  
ENST00000306151,ENST00000379439  
ENST00000225550  
ENST00000316924,ENST00000394066,ENST00000394067,ENST00000417856,ENST00000421552  
ENST00000256339,ENST00000393151,ENST00000553484,ENST00000555664  
ENST00000262189,ENST00000355193  
ENST00000289292,ENST00000376020,ENST00000460112  
ENST00000325945,ENST00000361035  
ENST00000333229  
ENST00000354476,ENST00000390003,ENST00000402934,ENST00000404525,ENST00000404816,ENST00000  
ENST00000356929  
ENST00000282869  
ENST00000357258,ENST00000393785,ENST00000462705,ENST00000464560,ENST00000471418,ENST00000  
ENST00000359798,ENST00000487863  
ENST00000342960,ENST00000369338,ENST00000490598  
ENST00000158526,ENST00000393600  
ENST00000375394,ENST00000544581  
ENST00000313735  
ENST00000321725  
ENST00000322313,ENST00000393006,ENST00000408998,ENST00000409658,ENST00000436787  
ENST00000357362,ENST00000399222,ENST00000399232,ENST00000426342,ENST00000439988  
ENST00000536728  
ENST00000456556  
ENST00000336128,ENST00000366197  
ENST00000001008  
ENST00000257766,ENST00000403245

ENST00000338977,ENST00000511833  
ENST00000311637,ENST00000338821,ENST00000402822  
ENST00000360131  
ENST00000316073  
ENST00000354258,ENST00000425148  
ENST00000260818  
ENST00000317702,ENST00000590103  
ENST00000377564  
ENST00000296870  
ENST00000300870  
ENST00000256339,ENST00000393151,ENST00000553484,ENST00000555664  
ENST00000262441,ENST00000574745  
ENST00000354959,ENST00000594012,ENST00000595461,ENST00000598381  
ENST00000331035,ENST00000381469,ENST00000432757  
ENST00000371365  
ENST00000419318,ENST00000430385  
ENST00000377626,ENST00000602553  
ENST00000429747,ENST00000502818,ENST00000511604,ENST00000512055,ENST00000512332  
ENST00000278460,ENST00000378615,ENST00000378618,ENST00000395460,ENST00000526827,ENST00000:  
ENST00000367462,ENST00000534846  
ENST00000245907  
ENST00000296869,ENST00000357096,ENST00000379240,ENST00000379244,ENST00000379246,ENST00000:  
ENST00000379370  
ENST00000300870  
ENST00000276344,ENST00000360243,ENST00000370335,ENST00000370337,ENST00000370340,ENST00000:  
ENST00000379802,ENST00000418664  
ENST00000317178  
ENST00000268489,ENST00000397992  
ENST00000391413  
ENST00000311048  
ENST00000328178,ENST00000345030,ENST00000596534,ENST00000601023  
ENST00000490820,ENST00000525639,ENST00000527447  
ENST00000600228  
ENST00000361937,ENST00000401393,ENST00000558357  
ENST00000303592  
ENST00000293879,ENST00000549091,ENST00000552728  
ENST00000366691  
ENST00000328178,ENST00000328178,ENST00000345030,ENST00000345030,ENST00000596534,ENST00000:  
ENST00000312908,ENST00000531805,ENST00000532828  
ENST00000295025,ENST00000394479  
ENST00000333891,ENST00000423517  
ENST00000523833  
ENST00000372588  
ENST00000253693  
ENST00000312513,ENST00000580762,ENST00000582535  
ENST00000322644  
ENST00000283645,ENST00000453949



ENST00000261588  
ENST00000221355,ENST00000434248  
ENST00000331925,ENST00000573283,ENST00000575087,ENST00000575842,ENST00000576544  
ENST00000378024  
ENST00000418100  
ENST00000245838,ENST00000355725,ENST00000491737  
ENST00000311048,ENST00000344930,ENST00000395391,ENST00000423627  
ENST00000307355,ENST00000359735,ENST00000397136,ENST00000437743,ENST00000440155  
ENST00000300619,ENST00000300619,ENST00000300619,ENST00000305570,ENST00000343776,ENST00000:  
ENST00000341319,ENST00000468734  
ENST00000295897,ENST00000401494,ENST00000415165,ENST00000441319,ENST00000509063  
ENST00000420323  
ENST00000348028,ENST00000349350,ENST00000421100,ENST00000427578,ENST00000443370,ENST00000:  
ENST00000291707,ENST00000598614  
ENST00000456556  
ENST00000314686,ENST00000429348,ENST00000432264,ENST00000447116,ENST00000456778,ENST00000:  
ENST00000371068,ENST00000433625,ENST00000480623,ENST00000538167  
ENST00000338977,ENST00000511833  
ENST00000395385,ENST00000402377  
ENST00000376767  
ENST00000396073  
ENST00000262327,ENST00000378526,ENST00000585941,ENST00000592690  
ENST00000348028,ENST00000349350,ENST00000421100,ENST00000427578,ENST00000443370,ENST00000:  
ENST00000265354,ENST00000457278  
ENST00000391413  
ENST00000598347  
ENST00000343776,ENST00000397097  
ENST00000282869,ENST00000395385,ENST00000402377  
ENST00000343776,ENST00000397097  
ENST00000368850,ENST00000368851  
ENST00000257622,ENST00000358357,ENST00000395270,ENST00000434423,ENST00000446813  
ENST00000378024  
ENST00000334493,ENST00000469830,ENST00000477459  
ENST00000376228,ENST00000376237,ENST00000383329  
ENST00000528685  
ENST00000343984,ENST00000354228,ENST00000354416,ENST00000360156,ENST00000394610,ENST00000:  
ENST00000427495,ENST00000442594,ENST00000536534  
ENST00000356929,ENST00000397126,ENST00000397126  
ENST00000344930,ENST00000395391,ENST00000423627  
ENST00000299927,ENST00000559607,ENST00000560079  
ENST00000344930,ENST00000395391,ENST00000423627  
ENST00000356929,ENST00000356929  
ENST00000300619,ENST00000397082  
ENST00000328178,ENST00000345030,ENST00000596534,ENST00000601023  
ENST00000305570,ENST00000328178,ENST00000344930,ENST00000345030,ENST00000356929,ENST00000:  
ENST00000300619,ENST00000397082  
ENST00000397126

ENST00000374694  
ENST00000303319,ENST00000303319,ENST00000303319,ENST00000422782,ENST00000422782,ENST00000:  
ENST00000303319,ENST00000303319,ENST00000303319,ENST00000422782,ENST00000422782,ENST00000:  
ENST00000303319,ENST00000303319,ENST00000303319,ENST00000422782,ENST00000422782,ENST00000:  
ENST00000397126  
ENST00000309988,ENST00000309988,ENST00000309988,ENST00000309988,ENST00000349807,ENST00000:  
ENST00000311519,ENST00000311519,ENST00000311519,ENST00000311519,ENST00000311519,ENST00000:  
ENST00000300870,ENST00000300870  
ENST00000377564  
ENST00000246006  
ENST00000368850,ENST00000368850,ENST00000368851,ENST00000368851  
ENST00000293925,ENST00000293925,ENST00000293925,ENST00000397412,ENST00000397412,ENST00000:  
ENST00000356929  
ENST00000372880  
ENST00000253693  
ENST00000366691  
ENST00000256339,ENST00000256339,ENST00000256339,ENST00000256339,ENST00000393151,ENST00000:  
ENST00000322313,ENST00000322313,ENST00000322313,ENST00000322313,ENST00000393006,ENST00000:  
ENST00000374518  
ENST00000312513,ENST00000312513,ENST00000312513,ENST00000580762,ENST00000580762,ENST00000:  
ENST00000312513,ENST00000312513,ENST00000312513,ENST00000580762,ENST00000580762,ENST00000:  
ENST00000312513,ENST00000312513,ENST00000312513,ENST00000580762,ENST00000580762,ENST00000:  
ENST00000388996,ENST00000388996,ENST00000388996,ENST00000519445,ENST00000519445,ENST00000:  
ENST00000282869  
ENST00000490820,ENST00000490820,ENST00000490820,ENST00000525639,ENST00000525639,ENST00000:  
ENST00000389131,ENST00000389131,ENST00000389131,ENST00000389131,ENST00000389131,ENST00000:  
ENST00000528685  
ENST00000340027,ENST00000340027,ENST00000340027,ENST00000340027,ENST00000376071,ENST00000:  
ENST00000333229  
ENST00000294724,ENST00000294724,ENST00000294724,ENST00000294724,ENST00000294724,ENST00000:  
ENST00000296870  
ENST00000338977,ENST00000338977,ENST00000511833,ENST00000511833  
ENST00000371068,ENST00000371068,ENST00000371068,ENST00000371068,ENST00000433625,ENST00000:  
ENST00000265354,ENST00000265354,ENST00000457278,ENST00000457278  
ENST00000281815,ENST00000281815,ENST00000338347,ENST00000338347  
ENST00000334197,ENST00000334197,ENST00000334197,ENST00000452676,ENST00000452676,ENST00000:  
ENST00000300113  
ENST00000343905  
ENST00000291707,ENST00000291707,ENST00000598614,ENST00000598614  
ENST00000377626,ENST00000377626,ENST00000602553,ENST00000602553  
ENST00000354959,ENST00000354959,ENST00000354959,ENST00000354959,ENST00000594012,ENST00000:  
ENST00000361193,ENST00000361193,ENST00000361193,ENST00000361193,ENST00000361193,ENST00000:  
ENST00000283645,ENST00000283645,ENST00000453949,ENST00000453949  
ENST00000487078  
ENST00000328178,ENST00000328178,ENST00000328178,ENST00000328178,ENST00000345030,ENST00000:  
ENST00000395385,ENST00000395385,ENST00000402377,ENST00000402377  
ENST00000344930,ENST00000344930,ENST00000344930,ENST00000395391,ENST00000395391,ENST00000:

ENST00000266079,ENST00000266079,ENST00000535781,ENST00000535781  
ENST00000296869,ENST00000296869,ENST00000296869,ENST00000296869,ENST00000296869,ENST00000:  
ENST00000303592  
ENST00000300619,ENST00000300619,ENST00000397082,ENST00000397082  
ENST00000375394,ENST00000375394,ENST00000544581,ENST00000544581  
ENST00000239938  
ENST00000397910  
ENST00000313735  
ENST00000326637,ENST00000326637,ENST00000326637,ENST00000370891,ENST00000370891,ENST00000:  
ENST00000001008  
ENST00000254260,ENST00000254260,ENST00000254260,ENST00000254260,ENST00000400226,ENST00000:  
ENST00000344930,ENST00000344930,ENST00000344930,ENST00000395391,ENST00000395391,ENST00000:  
ENST00000253435,ENST00000253435,ENST00000253435,ENST00000598265,ENST00000598265,ENST00000:  
ENST00000367462,ENST00000367462,ENST00000534846,ENST00000534846  
ENST00000361937,ENST00000361937,ENST00000361937,ENST00000401393,ENST00000401393,ENST00000:  
ENST00000257017  
ENST00000306151,ENST00000306151,ENST00000379439,ENST00000379439  
ENST00000356929  
ENST00000370742,ENST00000370742,ENST00000401034,ENST00000401034  
ENST00000277549,ENST00000277549,ENST00000277549,ENST00000277549,ENST00000277549,ENST00000:  
ENST00000308158,ENST00000308158,ENST00000308158,ENST00000323594,ENST00000323594,ENST00000:  
ENST00000343776,ENST00000343776,ENST00000397097,ENST00000397097  
ENST00000311048  
ENST00000245907  
ENST00000419318,ENST00000419318,ENST00000430385,ENST00000430385  
ENST00000536728  
ENST00000427495,ENST00000427495,ENST00000427495,ENST00000442594,ENST00000442594,ENST00000:  
ENST00000361320  
ENST00000333891,ENST00000333891,ENST00000423517,ENST00000423517  
ENST00000293879,ENST00000293879,ENST00000293879,ENST00000549091,ENST00000549091,ENST00000:  
ENST00000301607,ENST00000301607,ENST00000586740,ENST00000586740  
ENST00000342960,ENST00000342960,ENST00000342960,ENST00000342960,ENST00000369338,ENST00000:  
ENST00000331035,ENST00000331035,ENST00000331035,ENST00000381469,ENST00000381469,ENST00000:  
ENST00000321725  
ENST00000300619,ENST00000300619,ENST00000300619,ENST00000300619,ENST00000354959,ENST00000:  
ENST00000299927,ENST00000299927,ENST00000299927,ENST00000559607,ENST00000559607,ENST00000:  
ENST00000257622,ENST00000257622,ENST00000257622,ENST00000257622,ENST00000257622,ENST00000:  
ENST00000376228,ENST00000376228,ENST00000376228,ENST00000376237,ENST00000376237,ENST00000:  
ENST00000429747,ENST00000429747,ENST00000429747,ENST00000429747,ENST00000429747,ENST00000:  
ENST00000356929  
ENST00000311637,ENST00000311637,ENST00000311637,ENST00000338821,ENST00000338821,ENST00000:  
ENST00000325945,ENST00000325945,ENST00000361035,ENST00000361035  
ENST00000260818  
ENST00000311048  
ENST00000379802,ENST00000379802,ENST00000418664,ENST00000418664  
ENST00000245838,ENST00000245838,ENST00000245838,ENST00000355725,ENST00000355725,ENST00000:  
ENST00000395385,ENST00000395385,ENST00000402377,ENST00000402377

ENST00000300619,ENST00000300619,ENST00000397082,ENST00000397082  
ENST00000322644  
ENST00000307355,ENST00000307355,ENST00000307355,ENST00000307355,ENST00000307355,ENST00000:  
ENST00000359798,ENST00000359798,ENST00000487863,ENST00000487863  
ENST00000300619,ENST00000300619,ENST00000397082,ENST00000397082  
ENST00000331925,ENST00000331925,ENST00000331925,ENST00000331925,ENST00000331925,ENST00000:  
ENST00000600228  
ENST00000317702,ENST00000317702,ENST00000590103,ENST00000590103  
ENST00000225550  
ENST00000336119,ENST00000336119,ENST00000336119,ENST00000336119,ENST00000336119,ENST00000:  
ENST00000342960,ENST00000342960,ENST00000342960,ENST00000369338,ENST00000369338,ENST00000:  
ENST00000306151,ENST00000306151,ENST00000379439,ENST00000379439  
ENST00000367796,ENST00000367796,ENST00000367797,ENST00000367797  
ENST00000262189,ENST00000262189,ENST00000355193,ENST00000355193  
ENST00000282869  
ENST00000316924,ENST00000316924,ENST00000316924,ENST00000316924,ENST00000316924,ENST00000:  
ENST00000266000,ENST00000266000,ENST00000266000,ENST00000266000,ENST00000266000,ENST00000:  
ENST00000268489,ENST00000268489,ENST00000397992,ENST00000397992  
ENST00000378491  
ENST00000420323  
ENST00000346193  
ENST00000367549  
ENST00000312908,ENST00000312908,ENST00000312908,ENST00000531805,ENST00000531805,ENST00000:  
ENST00000328178,ENST00000328178,ENST00000328178,ENST00000328178,ENST00000345030,ENST00000:  
ENST00000357362,ENST00000357362,ENST00000357362,ENST00000357362,ENST00000357362,ENST00000:  
ENST00000372588  
ENST00000343776,ENST00000343776,ENST00000397097,ENST00000397097  
ENST00000281815,ENST00000281815,ENST00000338347,ENST00000338347  
ENST00000289292,ENST00000289292,ENST00000289292,ENST00000376020,ENST00000376020,ENST00000:  
ENST00000418100  
ENST00000355221,ENST00000355221,ENST00000355221,ENST00000355221,ENST00000359530,ENST00000:  
ENST00000338608,ENST00000338608,ENST00000338608,ENST00000338608,ENST00000432063,ENST00000:  
ENST00000357258,ENST00000357258,ENST00000357258,ENST00000357258,ENST00000357258,ENST00000:  
ENST00000456556,ENST00000456556  
ENST00000354258,ENST00000354258,ENST00000425148,ENST00000425148  
ENST00000276344,ENST00000276344,ENST00000276344,ENST00000276344,ENST00000276344,ENST00000:  
ENST00000269844,ENST00000269844,ENST00000269844,ENST00000269844,ENST00000269844,ENST00000:  
ENST00000341319,ENST00000341319,ENST00000468734,ENST00000468734  
ENST00000356929  
ENST00000278460,ENST00000278460,ENST00000278460,ENST00000278460,ENST00000278460,ENST00000:  
ENST00000317178  
ENST00000354476,ENST00000354476,ENST00000354476,ENST00000354476,ENST00000354476,ENST00000:  
ENST00000262441,ENST00000262441,ENST00000574745,ENST00000574745  
ENST00000328178,ENST00000328178,ENST00000328178,ENST00000328178,ENST00000345030,ENST00000:  
ENST00000221355,ENST00000221355,ENST00000434248,ENST00000434248  
ENST00000305570,ENST00000305570,ENST00000358296,ENST00000358296  
ENST00000338977,ENST00000338977,ENST00000511833,ENST00000511833

ENST00000397126  
ENST00000397121  
ENST00000314686,ENST00000314686,ENST00000314686,ENST00000314686,ENST00000314686,ENST00000:  
ENST00000295897,ENST00000295897,ENST00000295897,ENST00000295897,ENST00000295897,ENST00000:  
ENST00000158526,ENST00000158526,ENST00000393600,ENST00000393600  
ENST00000262327,ENST00000262327,ENST00000262327,ENST00000262327,ENST00000378526,ENST00000:  
ENST00000367662  
ENST00000379370  
ENST00000306151,ENST00000306151,ENST00000379439,ENST00000379439  
ENST00000336128,ENST00000336128,ENST00000366197,ENST00000366197  
ENST00000261588  
ENST00000378024  
ENST00000295025,ENST00000295025,ENST00000394479,ENST00000394479  
ENST00000376767  
ENST00000409757,ENST00000409757,ENST00000448507,ENST00000448507  
ENST00000378024  
ENST00000334493,ENST00000334493,ENST00000469830,ENST00000469830  
ENST00000269305,ENST00000269305,ENST00000269305,ENST00000269305,ENST00000269305,ENST00000:  
ENST00000267540,ENST00000267540,ENST00000555447,ENST00000555447  
ENST00000342960,ENST00000342960,ENST00000490598,ENST00000490598  
ENST00000417435  
ENST00000316073  
ENST00000257766,ENST00000257766,ENST00000403245,ENST00000403245  
ENST00000596143,ENST00000596143,ENST00000600435,ENST00000600435  
ENST00000343984,ENST00000343984,ENST00000343984,ENST00000343984,ENST00000343984,ENST00000:  
ENST00000391413  
ENST00000256339,ENST00000256339,ENST00000256339,ENST00000256339,ENST00000393151,ENST00000:  
ENST00000396073  
ENST00000348028,ENST00000348028,ENST00000348028,ENST00000348028,ENST00000348028,ENST00000:  
ENST00000391413  
ENST00000348028,ENST00000348028,ENST00000348028,ENST00000348028,ENST00000348028,ENST00000:  
ENST00000598347  
ENST00000309988,ENST00000349807,ENST00000353004,ENST00000354078  
ENST00000281815,ENST00000338347  
ENST00000281815,ENST00000338347  
ENST00000342960,ENST00000490598  
ENST00000352853,ENST00000359524,ENST00000371432,ENST00000371436,ENST00000371438,ENST00000:  
ENST00000297954,ENST00000349097,ENST00000395477,ENST00000427277  
ENST00000265148,ENST00000380026  
ENST00000372880  
ENST00000332990,ENST00000415895  
ENST00000267540,ENST00000555447  
ENST00000417435  
ENST00000302124  
ENST00000304434,ENST00000370918,ENST00000541407,ENST00000542638  
ENST00000293925,ENST00000397412,ENST00000436138  
ENST00000374694

ENST00000294724,ENST00000361302,ENST00000361522,ENST00000361915,ENST00000370161,ENST00000:  
ENST00000372129  
ENST00000325241,ENST00000446747,ENST00000528372,ENST00000544249  
ENST00000308158,ENST00000323594,ENST00000510913  
ENST00000358511,ENST00000453409  
ENST00000367662  
ENST00000269305,ENST00000359597,ENST00000413465,ENST00000420246,ENST00000445888,ENST00000:  
ENST00000281815,ENST00000338347  
ENST00000264784,ENST00000309065,ENST00000506583,ENST00000513129  
ENST00000265425,ENST00000360488,ENST00000377850  
ENST00000342944,ENST00000357002  
ENST00000262189,ENST00000355193  
ENST00000289292,ENST00000376020,ENST00000460112  
ENST00000325945,ENST00000361035  
ENST00000333229  
ENST00000304883  
ENST00000390652,ENST00000585744,ENST00000588462  
ENST00000409792  
ENST00000321725  
ENST00000356297,ENST00000522628,ENST00000543296  
ENST00000326828,ENST00000348639,ENST00000559658  
ENST00000220959,ENST00000520539,ENST00000521922  
ENST00000346964,ENST00000357674,ENST00000450955  
ENST00000336128,ENST00000366197  
ENST00000328020,ENST00000379500,ENST00000533953  
ENST00000262441,ENST00000574745  
ENST00000367462,ENST00000534846  
ENST00000359798,ENST00000487863  
ENST00000246657,ENST00000579344  
ENST00000296869,ENST00000357096,ENST00000379240,ENST00000379244,ENST00000379246,ENST00000:  
ENST00000490820,ENST00000525639,ENST00000527447  
ENST00000261862,ENST00000355327,ENST00000357769  
ENST00000269081  
ENST00000293879,ENST00000549091,ENST00000552728  
ENST00000523833  
ENST00000245838,ENST00000355725,ENST00000491737  
ENST00000304514,ENST00000409886  
ENST00000311048  
ENST00000300619,ENST00000342944,ENST00000357002,ENST00000397082  
ENST00000296792,ENST00000508491,ENST00000543251  
ENST00000291707,ENST00000598614  
ENST00000391413  
ENST00000369202  
ENST00000156825,ENST00000434436,ENST00000590550,ENST00000592012  
ENST00000528685  
ENST00000331710  
ENST00000419039,ENST00000420871,ENST00000456556

ENST00000427495,ENST00000442594,ENST00000536534  
ENST00000252172,ENST00000418404  
ENST00000265023  
ENST00000374694  
ENST00000409792  
ENST00000309988,ENST00000309988,ENST00000309988,ENST00000309988,ENST00000349807,ENST00000:  
ENST00000297954,ENST00000297954,ENST00000297954,ENST00000297954,ENST00000349097,ENST00000:  
ENST00000293925,ENST00000293925,ENST00000293925,ENST00000397412,ENST00000397412,ENST00000:  
ENST00000372880  
ENST00000264784,ENST00000264784,ENST00000264784,ENST00000264784,ENST00000309065,ENST00000:  
ENST00000265425,ENST00000265425,ENST00000265425,ENST00000360488,ENST00000360488,ENST00000:  
ENST00000265425,ENST00000265425,ENST00000265425,ENST00000360488,ENST00000360488,ENST00000:  
ENST00000490820,ENST00000490820,ENST00000490820,ENST00000525639,ENST00000525639,ENST00000:  
ENST00000389131,ENST00000389131,ENST00000389131,ENST00000389131,ENST00000389131,ENST00000:  
ENST00000302124  
ENST00000528685  
ENST00000333229  
ENST00000294724,ENST00000294724,ENST00000294724,ENST00000294724,ENST00000294724,ENST00000:  
ENST00000281815,ENST00000281815,ENST00000338347,ENST00000338347  
ENST00000246657,ENST00000246657,ENST00000579344,ENST00000579344  
ENST00000291707,ENST00000291707,ENST00000598614,ENST00000598614  
ENST00000328020,ENST00000328020,ENST00000328020,ENST00000379500,ENST00000379500,ENST00000:  
ENST00000358511,ENST00000358511,ENST00000453409,ENST00000453409  
ENST00000352853,ENST00000352853,ENST00000352853,ENST00000352853,ENST00000352853,ENST00000:  
ENST00000304883  
ENST00000331710  
ENST00000342944,ENST00000342944,ENST00000357002,ENST00000357002  
ENST00000419039,ENST00000419039,ENST00000419039,ENST00000420871,ENST00000420871,ENST00000:  
ENST00000296869,ENST00000296869,ENST00000296869,ENST00000296869,ENST00000296869,ENST00000:  
ENST00000390652,ENST00000390652,ENST00000390652,ENST00000585744,ENST00000585744,ENST00000:  
ENST00000346964,ENST00000346964,ENST00000346964,ENST00000357674,ENST00000357674,ENST00000:  
ENST00000367462,ENST00000367462,ENST00000534846,ENST00000534846  
ENST00000308158,ENST00000308158,ENST00000308158,ENST00000323594,ENST00000323594,ENST00000:  
ENST00000427495,ENST00000427495,ENST00000427495,ENST00000442594,ENST00000442594,ENST00000:  
ENST00000325241,ENST00000325241,ENST00000325241,ENST00000325241,ENST00000446747,ENST00000:  
ENST00000293879,ENST00000293879,ENST00000293879,ENST00000549091,ENST00000549091,ENST00000:  
ENST00000321725  
ENST00000332990,ENST00000332990,ENST00000415895,ENST00000415895  
ENST00000325945,ENST00000325945,ENST00000361035,ENST00000361035  
ENST00000311048  
ENST00000245838,ENST00000245838,ENST00000245838,ENST00000355725,ENST00000355725,ENST00000:  
ENST00000300619,ENST00000300619,ENST00000397082,ENST00000397082  
ENST00000304434,ENST00000304434,ENST00000304434,ENST00000304434,ENST00000370918,ENST00000:  
ENST00000262189,ENST00000262189,ENST00000355193,ENST00000355193  
ENST00000281815,ENST00000281815,ENST00000338347,ENST00000338347  
ENST00000289292,ENST00000289292,ENST00000289292,ENST00000376020,ENST00000376020,ENST00000:  
ENST00000372129

ENST00000356297,ENST00000356297,ENST00000356297,ENST00000522628,ENST00000522628,ENST00000:  
ENST00000265148,ENST00000265148,ENST00000380026,ENST00000380026  
ENST00000262441,ENST00000262441,ENST00000574745,ENST00000574745  
ENST00000269081  
ENST00000281815,ENST00000281815,ENST00000338347,ENST00000338347  
ENST00000304514,ENST00000304514,ENST00000409886,ENST00000409886  
ENST00000359798,ENST00000359798,ENST00000487863,ENST00000487863  
ENST00000296792,ENST00000296792,ENST00000296792,ENST00000508491,ENST00000508491,ENST00000:  
ENST00000367662  
ENST00000220959,ENST00000220959,ENST00000220959,ENST00000520539,ENST00000520539,ENST00000:  
ENST00000336128,ENST00000336128,ENST00000366197,ENST00000366197  
ENST00000326828,ENST00000326828,ENST00000326828,ENST00000348639,ENST00000348639,ENST00000:  
ENST00000269305,ENST00000269305,ENST00000269305,ENST00000269305,ENST00000269305,ENST00000:  
ENST00000267540,ENST00000267540,ENST00000555447,ENST00000555447  
ENST00000342960,ENST00000342960,ENST00000490598,ENST00000490598  
ENST00000417435  
ENST00000391413  
ENST00000156825,ENST00000156825,ENST00000156825,ENST00000156825,ENST00000434436,ENST00000:  
ENST00000252172,ENST00000252172,ENST00000418404,ENST00000418404  
ENST00000261862,ENST00000261862,ENST00000261862,ENST00000355327,ENST00000355327,ENST00000:  
ENST00000265023  
ENST00000369202  
ENST00000309988,ENST00000349807,ENST00000353004,ENST00000354078  
ENST00000281815,ENST00000338347  
ENST00000281815,ENST00000338347  
ENST00000300113  
ENST00000342960,ENST00000490598  
ENST00000352853,ENST00000359524,ENST00000371432,ENST00000371436,ENST00000371438,ENST00000:  
ENST00000297954,ENST00000349097,ENST00000395477,ENST00000427277  
ENST00000265148,ENST00000380026  
ENST00000372880  
ENST00000267540,ENST00000555447  
ENST00000417435  
ENST00000343905  
ENST00000304434,ENST00000370918,ENST00000541407,ENST00000542638  
ENST00000293925,ENST00000397412,ENST00000436138  
ENST00000374694  
ENST00000294724,ENST00000361302,ENST00000361522,ENST00000361915,ENST00000370161,ENST00000:  
ENST00000372129  
ENST00000308158,ENST00000323594,ENST00000510913  
ENST00000367662  
ENST00000269305,ENST00000359597,ENST00000413465,ENST00000420246,ENST00000445888,ENST00000:  
ENST00000281815,ENST00000338347  
ENST00000541274  
ENST00000265425,ENST00000360488,ENST00000377850  
ENST00000262189,ENST00000355193  
ENST00000289292,ENST00000376020,ENST00000460112



ENST00000325945,ENST00000361035  
ENST00000333229  
ENST00000304883  
ENST00000528685  
ENST00000409792  
ENST00000281815,ENST00000338347  
ENST00000321725  
ENST00000356297,ENST00000522628,ENST00000543296  
ENST00000326828,ENST00000348639,ENST00000559658  
ENST00000346964,ENST00000357674,ENST00000450955  
ENST00000336128,ENST00000366197  
ENST00000328020,ENST00000379500,ENST00000533953  
ENST00000262441,ENST00000574745  
ENST00000367462,ENST00000534846  
ENST00000246657,ENST00000579344  
ENST00000296869,ENST00000357096,ENST00000379240,ENST00000379244,ENST00000379246,ENST00000:  
ENST00000322139,ENST00000332647,ENST00000355813,ENST00000538690  
ENST00000490820,ENST00000525639,ENST00000527447  
ENST00000293879,ENST00000549091,ENST00000552728  
ENST00000523833  
ENST00000245838,ENST00000355725,ENST00000491737  
ENST00000304514,ENST00000409886  
ENST00000296792,ENST00000508491,ENST00000543251  
ENST00000291707,ENST00000598614  
ENST00000376767  
ENST00000298292,ENST00000406043  
ENST00000408903  
ENST00000367482,ENST00000367483,ENST00000367485,ENST00000367486,ENST00000445192  
ENST00000528685  
ENST00000427495,ENST00000442594,ENST00000536534  
ENST00000252172,ENST00000418404  
ENST00000243286,ENST00000372627,ENST00000372628  
ENST00000489525  
ENST00000374694  
ENST00000489525  
ENST00000409792  
ENST00000408903  
ENST00000309988,ENST00000309988,ENST00000309988,ENST00000309988,ENST00000349807,ENST00000:  
ENST00000297954,ENST00000297954,ENST00000297954,ENST00000297954,ENST00000349097,ENST00000:  
ENST00000293925,ENST00000293925,ENST00000293925,ENST00000397412,ENST00000397412,ENST00000:  
ENST00000372880  
ENST00000265425,ENST00000265425,ENST00000265425,ENST00000360488,ENST00000360488,ENST00000:  
ENST00000265425,ENST00000265425,ENST00000265425,ENST00000360488,ENST00000360488,ENST00000:  
ENST00000490820,ENST00000490820,ENST00000490820,ENST00000525639,ENST00000525639,ENST00000:  
ENST00000389131,ENST00000389131,ENST00000389131,ENST00000389131,ENST00000389131,ENST00000:  
ENST00000528685,ENST00000528685  
ENST00000333229

ENST00000294724,ENST00000294724,ENST00000294724,ENST00000294724,ENST00000294724,ENST00000:  
ENST00000281815,ENST00000281815,ENST00000281815,ENST00000281815,ENST00000338347,ENST00000:  
ENST00000246657,ENST00000246657,ENST00000579344,ENST00000579344  
ENST00000300113  
ENST00000343905  
ENST00000291707,ENST00000291707,ENST00000598614,ENST00000598614  
ENST00000328020,ENST00000328020,ENST00000328020,ENST00000379500,ENST00000379500,ENST00000:  
ENST00000352853,ENST00000352853,ENST00000352853,ENST00000352853,ENST00000352853,ENST00000:  
ENST00000304883  
ENST00000296869,ENST00000296869,ENST00000296869,ENST00000296869,ENST00000296869,ENST00000:  
ENST00000346964,ENST00000346964,ENST00000346964,ENST00000357674,ENST00000357674,ENST00000:  
ENST00000367462,ENST00000367462,ENST00000534846,ENST00000534846  
ENST00000308158,ENST00000308158,ENST00000308158,ENST00000323594,ENST00000323594,ENST00000:  
ENST00000427495,ENST00000427495,ENST00000427495,ENST00000442594,ENST00000442594,ENST00000:  
ENST00000293879,ENST00000293879,ENST00000293879,ENST00000549091,ENST00000549091,ENST00000:  
ENST00000321725  
ENST00000325945,ENST00000325945,ENST00000361035,ENST00000361035  
ENST00000245838,ENST00000245838,ENST00000245838,ENST00000355725,ENST00000355725,ENST00000:  
ENST00000304434,ENST00000304434,ENST00000304434,ENST00000304434,ENST00000370918,ENST00000:  
ENST00000298292,ENST00000298292,ENST00000406043,ENST00000406043  
ENST00000262189,ENST00000262189,ENST00000355193,ENST00000355193  
ENST00000541274  
ENST00000281815,ENST00000281815,ENST00000338347,ENST00000338347  
ENST00000289292,ENST00000289292,ENST00000289292,ENST00000376020,ENST00000376020,ENST00000:  
ENST00000372129  
ENST00000356297,ENST00000356297,ENST00000356297,ENST00000522628,ENST00000522628,ENST00000:  
ENST00000265148,ENST00000265148,ENST00000380026,ENST00000380026  
ENST00000262441,ENST00000262441,ENST00000574745,ENST00000574745  
ENST00000281815,ENST00000281815,ENST00000338347,ENST00000338347  
ENST00000304514,ENST00000304514,ENST00000409886,ENST00000409886  
ENST00000322139,ENST00000322139,ENST00000322139,ENST00000322139,ENST00000332647,ENST00000:  
ENST00000296792,ENST00000296792,ENST00000296792,ENST00000508491,ENST00000508491,ENST00000:  
ENST00000367662  
ENST00000336128,ENST00000336128,ENST00000366197,ENST00000366197  
ENST00000326828,ENST00000326828,ENST00000326828,ENST00000348639,ENST00000348639,ENST00000:  
ENST00000376767  
ENST00000269305,ENST00000269305,ENST00000269305,ENST00000269305,ENST00000269305,ENST00000:  
ENST00000267540,ENST00000267540,ENST00000555447,ENST00000555447  
ENST00000342960,ENST00000342960,ENST00000490598,ENST00000490598  
ENST00000417435  
ENST00000252172,ENST00000252172,ENST00000418404,ENST00000418404  
ENST00000367482,ENST00000367482,ENST00000367482,ENST00000367482,ENST00000367482,ENST00000:  
ENST00000243286,ENST00000243286,ENST00000243286,ENST00000372627,ENST00000372627,ENST00000:  
ENST00000309988,ENST00000349807,ENST00000353004,ENST00000354078  
ENST00000313135  
ENST00000300113  
ENST00000352853,ENST00000359524,ENST00000371432,ENST00000371436,ENST00000371438,ENST00000:

ENST00000372880  
ENST00000332990,ENST00000415895  
ENST00000330891,ENST00000488961,ENST00000553096  
ENST00000267540,ENST00000555447  
ENST00000370616,ENST00000370621,ENST00000503581  
ENST00000417435  
ENST00000343905  
ENST00000304434,ENST00000370918,ENST00000541407,ENST00000542638  
ENST00000293925,ENST00000397412,ENST00000436138  
ENST00000410061  
ENST00000375379,ENST00000375383,ENST00000375401,ENST00000404049,ENST00000452825  
ENST00000160298,ENST00000446248  
ENST00000374694  
ENST00000294724,ENST00000361302,ENST00000361522,ENST00000361915,ENST00000370161,ENST00000:  
ENST00000277549,ENST00000277551,ENST00000371355,ENST00000371357,ENST00000371363,ENST00000:  
ENST00000305866,ENST00000535481,ENST00000544910  
ENST00000308158,ENST00000323594,ENST00000510913  
ENST00000367662  
ENST00000269305,ENST00000359597,ENST00000413465,ENST00000420246,ENST00000445888,ENST00000:  
ENST00000056217  
ENST00000299194,ENST00000535041,ENST00000543818  
ENST00000262189,ENST00000355193  
ENST00000289292,ENST00000376020,ENST00000460112  
ENST00000325945,ENST00000361035  
ENST00000333229  
ENST00000427522,ENST00000467148  
ENST00000287647,ENST00000383806,ENST00000383807,ENST00000419585  
ENST00000252034,ENST00000320399,ENST00000320492,ENST00000357036,ENST00000358929,ENST00000:  
ENST00000281513,ENST00000423602,ENST00000433283,ENST00000441750  
ENST00000334933,ENST00000348806,ENST00000360135,ENST00000360301,ENST00000381879,ENST00000:  
ENST00000321725  
ENST00000356297,ENST00000522628,ENST00000543296  
ENST00000294543,ENST00000375122,ENST00000375127  
ENST00000536728  
ENST00000378347  
ENST00000346964,ENST00000357674,ENST00000450955  
ENST00000336128,ENST00000366197  
ENST00000258526  
ENST00000338110,ENST00000395240,ENST00000395248,ENST00000412304,ENST00000563060,ENST00000:  
ENST00000542129  
ENST00000262441,ENST00000574745  
ENST00000381401  
ENST00000538322  
ENST00000367462,ENST00000534846  
ENST00000349721,ENST00000357248,ENST00000382194,ENST00000382203  
ENST00000367500,ENST00000367501  
ENST00000296869,ENST00000357096,ENST00000379240,ENST00000379244,ENST00000379246,ENST00000:

ENST00000490820,ENST00000525639,ENST00000527447  
ENST00000296370  
ENST00000293879,ENST00000549091,ENST00000552728  
ENST00000523833  
ENST00000395542,ENST00000431948  
ENST00000245838,ENST00000355725,ENST00000491737  
ENST00000358984  
ENST00000317721,ENST00000409261  
ENST00000272831,ENST00000389175,ENST00000409270,ENST00000448409  
ENST00000427495,ENST00000442594,ENST00000536534  
ENST00000252172,ENST00000418404  
ENST00000358334,ENST00000359263,ENST00000371489,ENST00000371501,ENST00000371502  
ENST00000374694  
ENST00000313135  
ENST00000309988,ENST00000309988,ENST00000309988,ENST00000309988,ENST00000349807,ENST00000:  
ENST00000293925,ENST00000293925,ENST00000293925,ENST00000397412,ENST00000397412,ENST00000:  
ENST00000372880  
ENST00000395542,ENST00000395542,ENST00000431948,ENST00000431948  
ENST00000490820,ENST00000490820,ENST00000490820,ENST00000525639,ENST00000525639,ENST00000:  
ENST00000252034,ENST00000252034,ENST00000252034,ENST00000252034,ENST00000252034,ENST00000:  
ENST00000389131,ENST00000389131,ENST00000389131,ENST00000389131,ENST00000389131,ENST00000:  
ENST00000281513,ENST00000281513,ENST00000281513,ENST00000281513,ENST00000423602,ENST00000:  
ENST00000333229  
ENST00000294724,ENST00000294724,ENST00000294724,ENST00000294724,ENST00000294724,ENST00000:  
ENST00000338110,ENST00000395240,ENST00000395248,ENST00000412304,ENST00000563060,ENST00000:  
ENST00000300113  
ENST00000343905  
ENST00000294543,ENST00000294543,ENST00000294543,ENST00000375122,ENST00000375122,ENST00000:  
ENST00000352853,ENST00000352853,ENST00000352853,ENST00000352853,ENST00000352853,ENST00000:  
ENST00000427522,ENST00000427522,ENST00000467148,ENST00000467148  
ENST00000299194,ENST00000299194,ENST00000299194,ENST00000535041,ENST00000535041,ENST00000:  
ENST00000296869,ENST00000296869,ENST00000296869,ENST00000296869,ENST00000296869,ENST00000:  
ENST00000258526  
ENST00000346964,ENST00000346964,ENST00000346964,ENST00000357674,ENST00000357674,ENST00000:  
ENST00000367462,ENST00000367462,ENST00000534846,ENST00000534846  
ENST00000308158,ENST00000308158,ENST00000308158,ENST00000323594,ENST00000323594,ENST00000:  
ENST00000536728  
ENST00000427495,ENST00000427495,ENST00000427495,ENST00000442594,ENST00000442594,ENST00000:  
ENST00000367500,ENST00000367500,ENST00000367501,ENST00000367501  
ENST00000160298,ENST00000160298,ENST00000446248,ENST00000446248  
ENST00000542129  
ENST00000056217  
ENST00000378347  
ENST00000293879,ENST00000293879,ENST00000293879,ENST00000549091,ENST00000549091,ENST00000:  
ENST00000321725  
ENST00000370616,ENST00000370616,ENST00000370616,ENST00000370621,ENST00000370621,ENST00000:  
ENST00000538322

ENST00000332990,ENST00000332990,ENST00000415895,ENST00000415895  
ENST00000358334,ENST00000358334,ENST00000358334,ENST00000358334,ENST00000358334,ENST00000:  
ENST00000325945,ENST00000325945,ENST00000361035,ENST00000361035  
ENST00000245838,ENST00000245838,ENST00000245838,ENST00000355725,ENST00000355725,ENST00000:  
ENST00000330891,ENST00000330891,ENST00000330891,ENST00000488961,ENST00000488961,ENST00000:  
ENST00000304434,ENST00000304434,ENST00000304434,ENST00000304434,ENST00000370918,ENST00000:  
ENST00000381401  
ENST00000410061  
ENST00000262189,ENST00000262189,ENST00000355193,ENST00000355193  
ENST00000334933,ENST00000334933,ENST00000334933,ENST00000334933,ENST00000334933,ENST00000:  
ENST00000287647,ENST00000287647,ENST00000287647,ENST00000287647,ENST00000383806,ENST00000:  
ENST00000289292,ENST00000289292,ENST00000289292,ENST00000376020,ENST00000376020,ENST00000:  
ENST00000305866,ENST00000305866,ENST00000305866,ENST00000535481,ENST00000535481,ENST00000:  
ENST00000356297,ENST00000356297,ENST00000356297,ENST00000522628,ENST00000522628,ENST00000:  
ENST00000277549,ENST00000277549,ENST00000277549,ENST00000277549,ENST00000277549,ENST00000:  
ENST00000262441,ENST00000262441,ENST00000574745,ENST00000574745  
ENST00000375379,ENST00000375379,ENST00000375379,ENST00000375379,ENST00000375379,ENST00000:  
ENST00000296370  
ENST00000367662  
ENST00000336128,ENST00000336128,ENST00000366197,ENST00000366197  
ENST00000349721,ENST00000349721,ENST00000349721,ENST00000349721,ENST00000357248,ENST00000:  
ENST00000269305,ENST00000269305,ENST00000269305,ENST00000269305,ENST00000269305,ENST00000:  
ENST00000267540,ENST00000267540,ENST00000555447,ENST00000555447  
ENST00000417435  
ENST00000358984  
ENST00000317721,ENST00000317721,ENST00000409261,ENST00000409261  
ENST00000252172,ENST00000252172,ENST00000418404,ENST00000418404  
ENST00000272831,ENST00000272831,ENST00000272831,ENST00000272831,ENST00000389175,ENST00000:  
ENST00000379359  
ENST00000441802  
ENST00000247829,ENST00000393330,ENST00000546561,ENST00000552128  
ENST00000261244,ENST00000354386,ENST00000423743,ENST00000554463,ENST00000555203,ENST00000:  
ENST00000317147,ENST00000441024,ENST00000567188,ENST00000569240  
ENST00000216807,ENST00000543183  
ENST00000216277,ENST00000392990,ENST00000555626  
ENST00000378472,ENST00000407775,ENST00000517361,ENST00000520492  
ENST00000266497,ENST00000433979,ENST00000538779  
ENST00000294304,ENST00000529993  
ENST00000378549,ENST00000378565  
ENST00000382869,ENST00000382871,ENST00000382874,ENST00000382881  
ENST00000523130,ENST00000524189  
ENST00000261693,ENST00000339570,ENST00000376788,ENST00000415380,ENST00000540495,ENST00000:  
ENST00000247829,ENST00000393330,ENST00000546561,ENST00000552128  
ENST00000327475,ENST00000359357,ENST00000441566,ENST00000449981  
ENST00000226209,ENST00000583535  
ENST00000388726,ENST00000392650,ENST00000424778  
ENST00000452400

ENST00000356972  
ENST00000409923,ENST00000432176  
ENST00000523130,ENST00000523130,ENST00000524189,ENST00000524189  
ENST00000378549,ENST00000378549,ENST00000378565,ENST00000378565  
ENST00000261693,ENST00000261693,ENST00000261693,ENST00000261693,ENST00000261693,ENST00000:  
ENST00000216277,ENST00000216277,ENST00000216277,ENST00000392990,ENST00000392990,ENST00000:  
ENST00000441802  
ENST00000317147,ENST00000317147,ENST00000317147,ENST00000317147,ENST00000441024,ENST00000:  
ENST00000327475,ENST00000327475,ENST00000327475,ENST00000327475,ENST00000359357,ENST00000:  
ENST00000409923,ENST00000409923,ENST00000432176,ENST00000432176  
ENST00000261244,ENST00000261244,ENST00000261244,ENST00000261244,ENST00000261244,ENST00000:  
ENST00000379359  
ENST00000266497,ENST00000266497,ENST00000266497,ENST00000433979,ENST00000433979,ENST00000:  
ENST00000294304,ENST00000294304,ENST00000529993,ENST00000529993  
ENST00000247829,ENST00000247829,ENST00000247829,ENST00000247829,ENST00000247829,ENST00000:  
ENST00000452400  
ENST00000356972  
ENST00000226209,ENST00000226209,ENST00000583535,ENST00000583535  
ENST00000382869,ENST00000382869,ENST00000382869,ENST00000382869,ENST00000382871,ENST00000:  
ENST00000216807,ENST00000216807,ENST00000543183,ENST00000543183  
ENST00000378472,ENST00000378472,ENST00000378472,ENST00000378472,ENST00000407775,ENST00000:  
ENST00000388726,ENST00000388726,ENST00000388726,ENST00000392650,ENST00000392650,ENST00000:  
ENST00000369451,ENST00000435811,ENST00000454853  
ENST00000381566,ENST00000381567,ENST00000400841  
ENST00000296499,ENST00000433996  
ENST00000329245,ENST00000519139,ENST00000519148,ENST00000519591,ENST00000521193,ENST00000:  
ENST00000379423  
ENST00000343141,ENST00000356436,ENST00000379300,ENST00000379307,ENST00000450347,ENST00000:  
ENST00000366920,ENST00000392142,ENST00000544041  
ENST00000343810,ENST00000357123,ENST00000546244,ENST00000548646,ENST00000550165,ENST00000:  
ENST00000250156  
ENST00000456556  
ENST00000316459,ENST00000373510  
ENST00000456556  
ENST00000357570,ENST00000358338,ENST00000360108,ENST00000367567,ENST00000367570,ENST00000:  
ENST00000205214,ENST00000434343,ENST00000513376  
ENST00000329153  
ENST00000372984,ENST00000432648,ENST00000446189  
ENST00000350110,ENST00000446702,ENST00000539053  
ENST00000456556  
ENST00000343537,ENST00000391878  
ENST00000500254,ENST00000545626,ENST00000546254  
ENST00000427401  
ENST00000398587,ENST00000518882  
ENST00000343810,ENST00000343810,ENST00000343810,ENST00000343810,ENST00000343810,ENST00000:  
ENST00000366920,ENST00000366920,ENST00000366920,ENST00000392142,ENST00000392142,ENST00000:  
ENST00000316459,ENST00000316459,ENST00000373510,ENST00000373510

ENST00000369451,ENST00000369451,ENST00000369451,ENST00000435811,ENST00000435811,ENST00000.  
ENST00000205214,ENST00000205214,ENST00000205214,ENST00000434343,ENST00000434343,ENST00000.  
ENST00000250156  
ENST00000343141,ENST00000343141,ENST00000343141,ENST00000343141,ENST00000343141,ENST00000.  
ENST00000296499,ENST00000296499,ENST00000433996,ENST00000433996  
ENST00000456556,ENST00000456556,ENST00000456556  
ENST00000329153  
ENST00000379423  
ENST00000381566,ENST00000381566,ENST00000381566,ENST00000381567,ENST00000381567,ENST00000.  
ENST00000372984,ENST00000372984,ENST00000372984,ENST00000432648,ENST00000432648,ENST00000.  
ENST00000456556,ENST00000456556  
ENST00000427401  
ENST00000350110,ENST00000350110,ENST00000350110,ENST00000446702,ENST00000446702,ENST00000.  
ENST00000329245,ENST00000329245,ENST00000329245,ENST00000329245,ENST00000329245,ENST00000.  
ENST00000398587,ENST00000398587,ENST00000518882,ENST00000518882  
ENST00000343537,ENST00000343537,ENST00000391878,ENST00000391878  
ENST00000357570,ENST00000357570,ENST00000357570,ENST00000357570,ENST00000357570,ENST00000.  
ENST00000456556  
ENST00000500254,ENST00000500254,ENST00000500254,ENST00000545626,ENST00000545626,ENST00000.  
ENST00000310998,ENST00000375921,ENST00000375922,ENST00000375934,ENST00000375938,ENST00000.  
ENST00000359947,ENST00000372413,ENST00000372414,ENST00000422171,ENST00000438120  
ENST00000262300,ENST00000431515,ENST00000440027,ENST00000572059,ENST00000572619,ENST00000.  
ENST00000472091,ENST00000542862  
ENST00000312358  
ENST00000277817,ENST00000373700,ENST00000395198,ENST00000412272  
ENST00000393079,ENST00000446465  
ENST00000321871,ENST00000393130,ENST00000510183,ENST00000511555,ENST00000512137,ENST00000.  
ENST00000408907  
ENST00000259365,ENST00000375175,ENST00000395211  
ENST00000326197,ENST00000337495,ENST00000397174,ENST00000402904  
ENST00000251472  
ENST00000529308  
ENST00000525985  
ENST00000251772,ENST00000393409  
ENST00000225916  
ENST00000246957,ENST00000538171,ENST00000575671,ENST00000576335  
ENST00000366956  
ENST00000253799,ENST00000452774  
ENST00000369768  
ENST00000290178,ENST00000331923  
ENST00000355235,ENST00000356834  
ENST00000257622,ENST00000358357,ENST00000395270,ENST00000434423,ENST00000446813  
ENST00000304141  
ENST00000231368,ENST00000395770  
ENST00000308284  
ENST00000493964  
ENST00000218507

ENST00000339994,ENST00000528731  
ENST00000371744,ENST00000371752,ENST00000371754,ENST00000396105,ENST00000455070  
ENST00000318967,ENST00000435409,ENST00000456435,ENST00000512605  
ENST00000336640,ENST00000356826,ENST00000394409,ENST00000394410,ENST00000394411,ENST00000:  
ENST00000321919,ENST00000381983,ENST00000436648,ENST00000591451  
ENST00000300589  
ENST00000361897,ENST00000431696,ENST00000464284,ENST00000493151,ENST00000530878  
ENST00000433197  
ENST00000344096,ENST00000393555  
ENST00000292199,ENST00000409109,ENST00000409265,ENST00000409991,ENST00000525863  
ENST00000296859,ENST00000307984,ENST00000308008,ENST00000507093,ENST00000509018,ENST00000:  
ENST00000226207  
ENST00000335350,ENST00000373192  
ENST00000344626,ENST00000358026,ENST00000413806,ENST00000429416,ENST00000444061,ENST00000:  
ENST00000341919,ENST00000346156,ENST00000395111,ENST00000443272,ENST00000586919,ENST00000:  
ENST00000172853,ENST00000397345,ENST00000409198,ENST00000413693,ENST00000427231,ENST00000:  
ENST00000334634,ENST00000368382,ENST00000368383,ENST00000545012  
ENST00000327097,ENST00000541757  
ENST00000264111,ENST00000397081,ENST00000397085,ENST00000397087,ENST00000535187,ENST00000:  
ENST00000273739,ENST00000503823,ENST00000503837,ENST00000504154  
ENST00000361003,ENST00000389707,ENST00000389708,ENST00000396441,ENST00000403290,ENST00000:  
ENST00000262715,ENST00000555727,ENST00000556935  
ENST00000314531  
ENST00000420713  
ENST00000375244,ENST00000375247  
ENST00000360215,ENST00000373853  
ENST00000538210,ENST00000606080  
ENST00000253952,ENST00000326266,ENST00000574549,ENST00000575576  
ENST00000303372,ENST00000426174  
ENST00000465301,ENST00000540313  
ENST00000433626  
ENST00000361722  
ENST0000050961,ENST00000455469,ENST00000517585,ENST00000518282,ENST00000520307,ENST00000:  
ENST00000357409,ENST00000360280,ENST00000376634,ENST00000376636  
ENST00000319715,ENST00000348022,ENST00000564314  
ENST00000333188,ENST00000507777  
ENST00000264357,ENST00000371251,ENST00000371256,ENST00000541091,ENST00000542149  
ENST00000368799  
ENST00000264187  
ENST00000317393,ENST00000340177  
ENST00000263461  
ENST00000264233  
ENST00000381356,ENST00000556351,ENST00000556885,ENST00000556927,ENST00000557540  
ENST00000389232,ENST00000415757  
ENST00000251091,ENST00000357634,ENST00000392067,ENST00000554335,ENST00000555192  
ENST00000360374  
ENST00000290239,ENST00000300278,ENST00000356577,ENST00000381692,ENST00000421541,ENST00000:



ENST00000361188,ENST00000361919,ENST00000394249,ENST00000442656  
ENST00000315677,ENST00000515196,ENST00000581527,ENST00000584874  
ENST00000262233,ENST00000327921,ENST00000334192  
ENST00000326261,ENST00000382841,ENST00000538872  
ENST00000217420  
ENST00000443617  
ENST00000553796  
ENST00000258400  
ENST00000345941,ENST00000378434  
ENST00000248901  
ENST00000375244,ENST00000375247,ENST00000451343  
ENST00000392413,ENST00000600328,ENST00000600359  
ENST00000259605,ENST00000350199,ENST00000353739,ENST00000357058,ENST00000377877,ENST00000:  
ENST00000316924,ENST00000394065,ENST00000394066,ENST00000394067,ENST00000394078,ENST00000:  
ENST00000357084,ENST00000395503,ENST00000536376  
ENST00000332047,ENST00000337090,ENST00000354446,ENST00000383229,ENST00000513612,ENST00000:  
ENST00000299821,ENST00000395698,ENST00000395701,ENST00000420993,ENST00000523045  
ENST00000257665,ENST00000453279  
ENST00000245923,ENST00000344680,ENST00000587597,ENST00000591286  
ENST00000053468  
ENST00000337917,ENST00000376049,ENST00000376059  
ENST00000299853,ENST00000359210,ENST00000418581,ENST00000564209  
ENST00000296782,ENST00000357387  
ENST00000342175,ENST00000342992,ENST00000359218,ENST00000460472,ENST00000589042,ENST00000:  
ENST00000379388  
ENST00000302797  
ENST00000322644  
ENST00000297784,ENST00000340019,ENST00000396237  
ENST00000367685  
ENST00000361952,ENST00000578339  
ENST00000477478,ENST00000487415,ENST00000574508,ENST00000575403,ENST00000575478,ENST00000:  
ENST00000349953,ENST00000351153,ENST00000358768,ENST00000406610,ENST00000462231  
ENST00000221347  
ENST00000261509,ENST00000333488,ENST00000505667,ENST00000508898  
ENST00000309446,ENST00000412414,ENST00000421199  
ENST00000270570,ENST00000395585,ENST00000457293,ENST00000571335,ENST00000575023  
ENST00000337233,ENST00000359949,ENST00000538701,ENST00000542067,ENST00000543171  
ENST00000335875,ENST00000454748  
ENST00000392413,ENST00000600328,ENST00000600359  
ENST00000320574,ENST00000535270,ENST00000539006  
ENST00000361897,ENST00000430120,ENST00000530878  
ENST00000452804  
ENST00000322090,ENST00000446778  
ENST00000336180,ENST00000418310,ENST00000538333  
ENST00000355619  
ENST00000014930  
ENST00000274963

ENST00000274392,ENST00000304400,ENST00000346918,ENST00000348126,ENST00000379787,ENST00000361897,ENST00000431696,ENST00000493151,ENST00000530878  
ENST00000221992,ENST00000398599,ENST00000405816,ENST00000598976  
ENST00000241651  
ENST00000240874,ENST00000360013,ENST00000460856  
ENST00000320580,ENST00000529757  
ENST00000417545  
ENST00000330133  
ENST00000396878,ENST00000416391,ENST00000574902,ENST00000576416  
ENST00000369111  
ENST00000255759,ENST00000573429,ENST00000575744,ENST00000575938  
ENST00000323418,ENST00000359636,ENST00000393324,ENST00000524826,ENST00000526504,ENST00000368804  
ENST00000338779  
ENST00000242480,ENST00000411732,ENST00000439032  
ENST00000374202,ENST00000464642,ENST00000487883  
ENST00000299612,ENST00000308406,ENST00000395602,ENST00000395604  
ENST00000343816,ENST00000352432,ENST00000360273,ENST00000383800,ENST00000397077,ENST00000292807,ENST00000382456,ENST00000411763,ENST00000432591,ENST00000439647  
ENST00000360215,ENST00000373853  
ENST00000331351  
ENST00000289893,ENST00000317713,ENST00000361689,ENST00000372915,ENST00000539005,ENST00000378123,ENST00000531613  
ENST00000336301,ENST00000508628,ENST00000582970  
ENST00000327564,ENST00000341671,ENST00000394713,ENST00000543378,ENST00000578674,ENST00000261187,ENST00000543448,ENST00000547379,ENST00000548610,ENST00000552024,ENST00000381621,ENST00000381623  
ENST00000251481,ENST00000326853,ENST00000409880,ENST00000437390,ENST00000438339  
ENST00000255641  
ENST00000345122,ENST00000432921,ENST00000539826,ENST00000556611  
ENST00000397071,ENST00000534993,ENST00000545240  
ENST00000289004,ENST00000543163  
ENST00000258083  
ENST00000261374  
ENST00000393217  
ENST00000333629  
ENST00000489294,ENST00000545294  
ENST00000381055,ENST00000464680  
ENST00000337920,ENST00000395376,ENST00000395379,ENST00000395386,ENST00000395390,ENST00000243914,ENST00000371196,ENST00000422869,ENST00000423479,ENST00000426658,ENST00000383820,ENST00000418713,ENST00000424438,ENST00000433972  
ENST00000321897,ENST00000416670,ENST00000541562,ENST00000542001  
ENST00000234739  
ENST00000287898,ENST00000296794,ENST00000426542,ENST00000437974,ENST00000513042,ENST00000300176  
ENST00000338675,ENST00000382409  
ENST00000192788,ENST00000452449

ENST00000298048,ENST00000536329,ENST00000536860,ENST00000536987,ENST00000538311,ENST00000:  
ENST00000330394  
ENST00000374300,ENST00000374301,ENST00000374303,ENST00000374307,ENST00000524618  
ENST00000313386,ENST00000502814,ENST00000507457,ENST00000515098,ENST00000542098  
ENST00000340684,ENST00000543802  
ENST00000263981,ENST00000281708,ENST00000296555,ENST00000393956,ENST00000603548,ENST00000:  
ENST00000246100,ENST00000304189,ENST00000381939,ENST00000381941,ENST00000541082  
ENST00000269703,ENST00000601005  
ENST00000323927  
ENST00000300917,ENST00000543872  
ENST00000372827,ENST00000397360  
ENST00000283645,ENST00000453949  
ENST00000338957,ENST00000423889  
ENST00000595295  
ENST00000276123,ENST00000360700,ENST00000373165,ENST00000395402  
ENST00000374469,ENST00000401783  
ENST00000301030,ENST00000378330  
ENST00000344387,ENST00000383744,ENST00000383745,ENST00000396058  
ENST00000355773,ENST00000393019  
ENST00000356309,ENST00000409339,ENST00000409423,ENST00000432615,ENST00000449727  
ENST00000411975,ENST00000435803,ENST00000544596  
ENST00000303354,ENST00000375387,ENST00000409435,ENST00000409672,ENST00000452182,ENST00000:  
ENST00000368868,ENST00000423070,ENST00000426705,ENST00000427867,ENST00000427977,ENST00000:  
ENST00000333172,ENST00000351136  
ENST00000340188,ENST00000366782,ENST00000366783,ENST00000391872,ENST00000422240,ENST00000:  
ENST00000320574,ENST00000535270,ENST00000539006  
ENST00000296440,ENST00000358459,ENST00000358536,ENST00000448774,ENST00000456774  
ENST00000539556  
ENST00000313400,ENST00000361209,ENST00000373996  
ENST00000333447,ENST00000407050,ENST00000443686,ENST00000541017,ENST00000541570,ENST00000:  
ENST00000564067  
ENST00000315215,ENST00000412232  
ENST00000299847,ENST00000397827,ENST00000401522  
ENST00000380255,ENST00000380262,ENST00000563694,ENST00000565740  
ENST00000251268,ENST00000334370  
ENST00000347559,ENST00000361308,ENST00000368297,ENST00000368299,ENST00000368300,ENST00000:  
ENST00000431683  
ENST00000509479  
ENST00000322937,ENST00000449493  
ENST00000319274,ENST00000342981,ENST00000346169,ENST00000350481,ENST00000352767,ENST00000:  
ENST00000265381  
ENST00000229304  
ENST00000271636  
ENST00000360726,ENST00000442253,ENST00000512121  
ENST00000394807  
ENST00000361926,ENST00000421050,ENST00000579439,ENST00000583529  
ENST00000311008,ENST00000323081,ENST00000334536,ENST00000352260,ENST00000565975,ENST00000:

ENST00000321725  
ENST00000366578,ENST00000542672  
ENST00000397910  
ENST00000248248,ENST00000439557,ENST00000545553  
ENST00000390294  
ENST00000306065  
ENST00000221538,ENST00000600188  
ENST00000374263,ENST00000374264,ENST00000374270  
ENST00000343115,ENST00000405097,ENST00000528498,ENST00000528900,ENST00000530085,ENST00000:  
ENST00000375394,ENST00000461073  
ENST00000396952  
ENST00000244496  
ENST00000358241  
ENST00000338745,ENST00000414509,ENST00000415069,ENST00000417717,ENST00000440737,ENST00000:  
ENST00000342494,ENST00000434735,ENST00000539599  
ENST00000389232,ENST00000415757  
ENST00000256031,ENST00000439040  
ENST00000253812  
ENST00000372262,ENST00000537909  
ENST00000419482,ENST00000444564  
ENST00000360359,ENST00000535627  
ENST00000330459,ENST00000537025  
ENST00000347464,ENST00000373525,ENST00000392017,ENST00000392018,ENST00000392020  
ENST00000330452,ENST00000394729  
ENST00000333676,ENST00000541223,ENST00000571730  
ENST00000335367,ENST00000397238,ENST00000463381,ENST00000468796,ENST00000473312  
ENST00000358970  
ENST00000262861,ENST00000308942,ENST00000366630  
ENST00000391571  
ENST00000350125,ENST00000352251  
ENST00000339306,ENST00000379660  
ENST00000278935  
ENST00000262662,ENST00000371761,ENST00000396148  
ENST00000306279  
ENST00000263094,ENST00000433129,ENST00000435683  
ENST00000264183,ENST00000349213,ENST00000366603,ENST00000421364  
ENST00000493463,ENST00000603053  
ENST00000293670  
ENST00000373299,ENST00000373302  
ENST00000319968  
ENST00000284259,ENST00000422003,ENST00000524726,ENST00000528512,ENST00000529397,ENST00000:  
ENST00000433765  
ENST00000312055,ENST00000354558,ENST00000415402,ENST00000526876,ENST00000529230  
ENST00000335110,ENST00000394329  
ENST00000376405,ENST00000376406  
ENST00000313599,ENST00000396630,ENST00000416109  
ENST00000221265,ENST00000221266,ENST00000595564

ENST00000288502,ENST00000374049  
ENST00000373298,ENST00000434584  
ENST00000310193  
ENST00000361699,ENST00000361981,ENST00000370055,ENST00000370057,ENST00000370060,ENST00000368804  
ENST00000314672,ENST00000580652,ENST00000583023  
ENST00000309244,ENST00000354232,ENST00000596253  
ENST00000377850  
ENST00000260762,ENST00000371547,ENST00000371552,ENST00000443748  
ENST00000368799  
ENST00000251582  
ENST00000367600,ENST00000367602  
ENST00000375135  
ENST00000356338,ENST00000358212,ENST00000399229,ENST00000399231,ENST00000399233,ENST00000379802,ENST00000418664  
ENST00000383781,ENST00000383785,ENST00000383787,ENST00000383788,ENST00000435459,ENST00000373479,ENST00000469731,ENST00000487950  
ENST00000331920,ENST00000375274,ENST00000418258,ENST00000421141,ENST00000429896,ENST00000263377  
ENST00000379593,ENST00000379607  
ENST00000542956  
ENST00000261374  
ENST00000355619  
ENST00000263981,ENST00000281708,ENST00000296555,ENST00000393956,ENST00000603548,ENST00000330452,ENST00000394729  
ENST00000345941,ENST00000378434  
ENST00000356309,ENST00000409339,ENST00000409423,ENST00000432615,ENST00000449727  
ENST00000218507,ENST00000372927,ENST00000423383  
ENST00000433626  
ENST00000262715,ENST00000555727,ENST00000556935  
ENST00000308284  
ENST00000564067  
ENST00000355235,ENST00000356834  
ENST00000582857  
ENST00000323927  
ENST00000309446,ENST00000412414,ENST00000421199  
ENST00000313400,ENST00000361209,ENST00000373996  
ENST00000539556  
ENST00000310193  
ENST00000322644  
ENST00000319968  
ENST00000333172,ENST00000351136  
ENST00000300589  
ENST00000320574,ENST00000535270,ENST00000539006  
ENST00000366578,ENST00000542672  
ENST00000355773,ENST00000393019  
ENST00000355773,ENST00000393019

ENST00000381356,ENST00000556351,ENST00000556885,ENST00000556927,ENST00000557540  
ENST00000298048,ENST00000536329,ENST00000536860,ENST00000536987,ENST00000538311,ENST00000:  
ENST00000417545  
ENST00000333676,ENST00000541223,ENST00000571730  
ENST00000014930  
ENST00000253799  
ENST00000314531  
ENST00000359947,ENST00000372413,ENST00000372414,ENST00000422171,ENST00000438120  
ENST00000246100,ENST00000304189,ENST00000381939,ENST00000381941,ENST00000541082  
ENST00000248901  
ENST00000316924,ENST00000394065,ENST00000394066,ENST00000394067,ENST00000394078,ENST00000:  
ENST00000317393,ENST00000340177  
ENST00000320574,ENST00000535270,ENST00000539006  
ENST00000372262,ENST00000537909  
ENST00000320580,ENST00000529757  
ENST00000343816,ENST00000352432,ENST00000360273,ENST00000383800,ENST00000397077,ENST00000:  
ENST00000327097,ENST00000541757  
ENST00000357409,ENST00000360280,ENST00000376634,ENST00000376636  
ENST00000248248,ENST00000439557,ENST00000545553  
ENST00000253952,ENST00000326266,ENST00000574549,ENST00000575576  
ENST00000367600,ENST00000367602  
ENST00000367685  
ENST00000333447,ENST00000407050,ENST00000443686,ENST00000541017,ENST00000541570,ENST00000:  
ENST00000374300,ENST00000374301,ENST00000374303,ENST00000374307,ENST00000524618  
ENST00000251091,ENST00000357634,ENST00000392067,ENST00000554335,ENST00000555192  
ENST00000336301,ENST00000508628,ENST00000582970  
ENST00000251772,ENST00000393409  
ENST00000375244,ENST00000375247  
ENST00000344626,ENST00000358026,ENST00000413806,ENST00000429416,ENST00000444061,ENST00000:  
ENST00000339994,ENST00000528731  
ENST00000296440,ENST00000358459,ENST00000358536,ENST00000448774,ENST00000456774  
ENST00000243914,ENST00000371196,ENST00000422869,ENST00000423479,ENST00000426658,ENST00000:  
ENST00000321871,ENST00000393130,ENST00000510183,ENST00000511555,ENST00000512137,ENST00000:  
ENST00000368868,ENST00000423070,ENST00000426705,ENST00000427867,ENST00000427977,ENST00000:  
ENST00000337917,ENST00000376049,ENST00000376059  
ENST00000312358  
ENST00000262662,ENST00000371761,ENST00000396148  
ENST00000330133  
ENST00000360215,ENST00000373853  
ENST00000292199,ENST00000409109,ENST00000409265,ENST00000409991,ENST00000525863  
ENST00000261509,ENST00000333488,ENST00000505667,ENST00000508898  
ENST00000538210,ENST00000606080  
ENST00000264111,ENST00000397081,ENST00000397087,ENST00000535187,ENST00000538974,ENST00000:  
ENST00000574730  
ENST00000263094,ENST00000433129,ENST00000435683  
ENST00000259605,ENST00000350199,ENST00000353739,ENST00000357058,ENST00000377877,ENST00000:  
ENST00000529308

ENST00000361952,ENST00000578339  
ENST00000489294,ENST00000545294  
ENST00000361897,ENST00000430120,ENST00000530878  
ENST00000277817,ENST00000373700,ENST00000395198,ENST00000412272  
ENST00000361897,ENST00000493151,ENST00000530878,ENST00000431696  
ENST00000306279  
ENST00000258400  
ENST00000229304  
ENST00000375394,ENST00000461073  
ENST00000304141  
ENST00000379802,ENST00000418664  
ENST00000299821,ENST00000395698,ENST00000395701,ENST00000420993,ENST00000523045  
ENST00000360215,ENST00000373853  
ENST00000241651  
ENST00000246957,ENST00000538171,ENST00000575671  
ENST00000255641  
ENST00000349953,ENST00000351153,ENST00000358768,ENST00000406610,ENST00000462231  
ENST00000383820,ENST00000418713,ENST00000424438,ENST00000433972  
ENST00000242480,ENST00000411732,ENST00000439032  
ENST00000361722  
ENST00000251472  
ENST00000192788,ENST00000452449  
ENST00000369768  
ENST00000394807  
ENST00000394807  
ENST00000289004,ENST00000543163  
ENST00000397910  
ENST00000326261,ENST00000382841,ENST00000538872  
ENST00000525985  
ENST00000226207  
ENST00000373192  
ENST00000337920,ENST00000395376,ENST00000395379,ENST00000395386,ENST00000395390,ENST00000:  
ENST00000356338,ENST00000358212,ENST00000399229,ENST00000399231,ENST00000399233,ENST00000:  
ENST00000251481,ENST00000326853,ENST00000409880,ENST00000437390,ENST00000438339  
ENST00000411975,ENST00000435803,ENST00000544596  
ENST00000336640,ENST00000356826,ENST00000394409,ENST00000394410,ENST00000394411,ENST00000:  
ENST00000373479,ENST00000469731,ENST00000487950  
ENST00000306065  
ENST00000302797  
ENST00000311008,ENST00000323081,ENST00000334536,ENST00000352260,ENST00000565975,ENST00000:  
ENST00000337233,ENST00000359949,ENST00000538701,ENST00000542067,ENST00000543171  
ENST00000299612,ENST00000308406,ENST00000395602,ENST00000395604  
ENST00000347464,ENST00000373525,ENST00000392017,ENST00000392018,ENST00000392020  
ENST00000393079,ENST00000446465  
ENST00000318967,ENST00000435409,ENST00000456435,ENST00000512605  
ENST00000326197,ENST00000337495,ENST00000397174,ENST00000402904  
ENST00000326197,ENST00000337495,ENST00000397174,ENST00000402904

ENST00000326197,ENST00000337495,ENST00000397174,ENST00000402904  
ENST00000326197,ENST00000337495,ENST00000397174,ENST00000402904  
ENST00000326197,ENST00000337495,ENST00000397174,ENST00000402904  
ENST00000360726,ENST00000442253,ENST00000512121  
ENST00000366956  
ENST00000360359,ENST00000535627  
ENST00000292807,ENST00000382456,ENST00000411763,ENST00000432591,ENST00000439647  
ENST00000259365,ENST00000375175,ENST00000395211  
ENST00000260762,ENST00000371547,ENST00000371552,ENST00000443748  
ENST00000303354,ENST00000375387,ENST00000409435,ENST00000409672  
ENST00000360374  
ENST00000375135  
ENST00000290178,ENST00000331923  
ENST00000333629  
ENST00000368804  
ENST00000443617  
ENST00000296782,ENST00000357387  
ENST00000330459,ENST00000537025  
ENST00000396952  
ENST00000321919,ENST00000381983,ENST00000436648,ENST00000591451  
ENST00000335367,ENST00000397238,ENST00000463381,ENST00000468796,ENST00000473312  
ENST00000321897,ENST00000416670,ENST00000541562,ENST00000542001  
ENST00000335875,ENST00000454748,ENST00000594180  
ENST00000240874,ENST00000360013,ENST00000460856  
ENST00000261187,ENST00000543448,ENST00000547379,ENST00000548610,ENST00000552024,ENST00000552024  
ENST00000335110,ENST00000394329  
ENST00000283645,ENST00000453949  
ENST00000231368,ENST00000395770  
ENST00000297784,ENST00000340019,ENST00000396237  
ENST00000273739,ENST00000503823,ENST00000503837,ENST00000504154  
ENST00000258083  
ENST00000309244,ENST00000354232,ENST00000596253  
ENST00000274963  
ENST00000300176  
ENST00000339306,ENST00000379660  
ENST00000333188,ENST00000507777  
ENST00000244496  
ENST00000225916  
ENST00000331351  
ENST00000378123,ENST00000531613  
ENST00000299853,ENST00000359210,ENST00000418581,ENST00000564209  
ENST00000336180,ENST00000418310,ENST00000538333  
ENST00000374202,ENST00000464642,ENST00000487883  
ENST00000255759,ENST00000573429,ENST00000575744,ENST00000575938  
ENST00000371744,ENST00000371752,ENST00000371754,ENST00000396105,ENST00000455070  
ENST00000264357,ENST00000371251,ENST00000371256,ENST00000541091,ENST00000542149  
ENST00000361897,ENST00000464284,ENST00000493151,ENST00000530878,ENST00000431696



ENST00000289893,ENST00000317713,ENST00000361689,ENST00000372915,ENST00000539005,ENST00000:  
ENST00000263461  
ENST00000340684  
ENST00000391571  
ENST00000274392,ENST00000304400,ENST00000346918,ENST00000348126,ENST00000379787,ENST00000:  
ENST00000331920,ENST00000375274,ENST00000418258,ENST00000421141,ENST00000429896,ENST00000:  
ENST00000344387,ENST00000383744,ENST00000383745,ENST00000396058  
ENST00000299847,ENST00000397827,ENST00000401522  
ENST00000598976,ENST00000221992,ENST00000398599,ENST00000405816  
ENST00000338957,ENST00000423889  
ENST00000373299,ENST00000373302  
ENST00000257622,ENST00000358357,ENST00000395270,ENST00000434423,ENST00000446813  
ENST00000509479  
ENST00000332047,ENST00000337090,ENST00000354446,ENST00000383229,ENST00000504929,ENST00000:  
ENST00000330394  
ENST00000321725  
ENST00000343115,ENST00000405097,ENST00000528498,ENST00000528900,ENST00000530085,ENST00000:  
ENST00000358241  
ENST00000493463,ENST00000603053  
ENST00000271636  
ENST00000315677,ENST00000515196,ENST00000581527,ENST00000584874  
ENST00000408907  
ENST00000380255,ENST00000380262,ENST00000563694,ENST00000565740  
ENST00000347559,ENST00000361308,ENST00000368297,ENST00000368299,ENST00000368300,ENST00000:  
ENST00000256031,ENST00000439040  
ENST00000312055,ENST00000354558,ENST00000415402,ENST00000526876,ENST00000529230  
ENST00000053468  
ENST00000314672,ENST00000580652,ENST00000583023  
ENST00000300917,ENST00000543872  
ENST00000287898,ENST00000296794,ENST00000426542,ENST00000437974,ENST00000513042,ENST00000:  
ENST00000303372,ENST00000426174  
ENST00000393217  
ENST00000334634,ENST00000368382,ENST00000368383,ENST00000545012  
ENST00000313599,ENST00000396630,ENST00000416109  
ENST00000284259,ENST00000422003,ENST00000524726,ENST00000528512,ENST00000529397,ENST00000:  
ENST00000315215,ENST00000412232  
ENST00000262233,ENST00000327921,ENST00000334192  
ENST00000390294  
ENST00000381055,ENST00000464680  
ENST00000301030,ENST00000378330  
ENST00000420713  
ENST00000264187  
ENST00000278935  
ENST00000379388  
ENST00000310998,ENST00000375921,ENST00000375922,ENST00000375934,ENST00000375938,ENST00000:  
ENST00000375244,ENST00000375247,ENST00000451343  
ENST00000251582

ENST00000372827,ENST00000397360  
ENST00000269703,ENST00000601005  
ENST00000350125,ENST00000352251  
ENST00000251268,ENST00000334370  
ENST00000217420  
ENST00000381621,ENST00000381623  
ENST00000338779  
ENST00000172853,ENST00000397345,ENST00000409198,ENST00000413693,ENST00000427231,ENST00000  
ENST00000389232,ENST00000415757  
ENST00000257665,ENST00000453279  
ENST00000419482,ENST00000444564  
ENST00000465301,ENST00000540313  
ENST00000361188,ENST00000361919,ENST00000394249,ENST00000442656  
ENST00000339656,ENST00000419854,ENST00000423137  
ENST00000344096,ENST00000393555  
ENST00000431683  
ENST00000374263,ENST00000374264,ENST00000374270  
ENST00000322937,ENST00000449493  
ENST00000221265,ENST00000221266,ENST00000595564  
ENST00000361699,ENST00000361981,ENST00000370055,ENST00000370057,ENST00000370060,ENST00000  
ENST00000313386,ENST00000502814,ENST00000507457,ENST00000515098,ENST00000542098  
ENST00000493964  
ENST00000253812  
ENST00000361926,ENST00000421050,ENST00000579439,ENST00000583529  
ENST00000263377  
ENST00000361003,ENST00000389707,ENST00000389708,ENST00000396441,ENST00000403290,ENST00000  
ENST00000452804  
ENST00000327564,ENST00000341671,ENST00000394713,ENST00000543378,ENST00000578674,ENST00000  
ENST00000392413,ENST00000600328,ENST00000600359,ENST00000392413,ENST00000600328,ENST00000  
ENST00000357084,ENST00000395503,ENST00000536376  
ENST00000264233  
ENST00000433197  
ENST00000389232,ENST00000415757  
ENST00000221538,ENST00000600188  
ENST00000322090,ENST00000446778  
ENST00000319274,ENST00000342981,ENST00000346169,ENST00000350481,ENST00000352767,ENST00000  
ENST00000276123,ENST00000360700,ENST00000373165,ENST00000395402  
ENST00000338675  
ENST00000270570,ENST00000395585,ENST00000457293,ENST00000571335,ENST00000575023  
ENST00000342175,ENST00000342992,ENST00000359218,ENST00000460472,ENST00000589042,ENST00000  
ENST00000345122,ENST00000432921,ENST00000539826,ENST00000556611  
ENST00000396878,ENST00000416391,ENST00000574902,ENST00000576416  
ENST00000335125,ENST00000382755,ENST00000397071,ENST00000534993,ENST00000545240,ENST00000  
ENST00000342494,ENST00000434735,ENST00000539599  
ENST00000341919,ENST00000346156,ENST00000395111,ENST00000443272,ENST00000586919,ENST00000  
ENST00000472091,ENST00000542862  
ENST00000293670

ENST00000383781,ENST00000383785,ENST00000383787,ENST00000383788,ENST00000435459,ENST00000  
ENST00000234739  
ENST00000264183,ENST00000349213,ENST00000366603,ENST00000421364  
ENST00000514667,ENST00000296859,ENST00000307984,ENST00000308008,ENST00000507093,ENST00000  
ENST00000221347  
ENST00000369111  
ENST00000262861,ENST00000308942,ENST00000366630  
ENST00000340188,ENST00000366782,ENST00000366783,ENST00000391872,ENST00000422240,ENST00000  
ENST0000050961,ENST00000455469,ENST00000517585,ENST00000518282,ENST00000520307,ENST00000  
ENST00000373298,ENST00000434584  
ENST00000319715,ENST00000348022,ENST00000564314  
ENST00000433765  
ENST00000338745,ENST00000414509,ENST00000415069,ENST00000417717,ENST00000440737,ENST00000  
ENST00000377850  
ENST00000290239,ENST00000300278,ENST00000356577,ENST00000381692,ENST00000421541,ENST00000  
ENST00000368799  
ENST00000374469,ENST00000401783  
ENST00000376405,ENST00000376406  
ENST00000288502,ENST00000374049  
ENST00000323418,ENST00000359636,ENST00000393324,ENST00000524826,ENST00000526504,ENST00000  
ENST00000245923,ENST00000344680,ENST00000587597,ENST00000591286  
ENST00000368799  
ENST00000379593,ENST00000379607  
ENST00000265381  
ENST00000358970  
ENST00000368804  
ENST00000263671,ENST00000376332,ENST00000528789,ENST00000534276  
ENST00000281815,ENST00000338347  
ENST00000342960,ENST00000490598  
ENST00000300976  
ENST00000303015,ENST00000520439,ENST00000522317  
ENST00000440491  
ENST00000390373  
ENST00000402038  
ENST00000302850,ENST00000341500  
ENST00000281815,ENST00000338347,ENST00000342960,ENST00000369338,ENST00000369339  
ENST00000252252  
ENST00000421673  
ENST00000390373  
ENST00000419039,ENST00000420871,ENST00000456556  
ENST00000261483  
ENST00000278882,ENST00000358464,ENST00000439954  
ENST00000323927  
ENST00000252071,ENST00000477871,ENST00000478393,ENST00000539352  
ENST00000304514,ENST00000409886  
ENST00000283351,ENST00000582539  
ENST00000417545

ENST00000278882,ENST00000358464,ENST00000439954  
ENST00000355673,ENST00000431731,ENST00000547545  
ENST00000335110,ENST00000394329  
ENST00000260356  
ENST00000420699,ENST00000461153  
ENST00000249007,ENST00000382088,ENST00000397468  
ENST00000391417  
ENST00000322396,ENST00000541232  
ENST00000439954  
ENST00000381055,ENST00000464680  
ENST00000557788  
ENST00000342947,ENST00000409775,ENST00000409970,ENST00000419307,ENST00000545231  
ENST00000418749  
ENST00000392002  
ENST00000452611  
ENST00000299440,ENST00000534663  
ENST00000342960,ENST00000369338,ENST00000369339  
ENST00000348028,ENST00000349350,ENST00000421100,ENST00000427578,ENST00000443370,ENST00000  
ENST00000399682  
ENST00000348028,ENST00000349350,ENST00000421100,ENST00000427578,ENST00000443370,ENST00000  
ENST00000356641,ENST00000397843,ENST00000532993  
ENST00000204517  
ENST00000333891,ENST00000423517  
ENST00000489525  
ENST00000281815,ENST00000338347  
ENST00000302850,ENST00000341500  
ENST00000322396,ENST00000541232  
ENST00000390373  
ENST00000300976  
ENST00000376324  
ENST00000252071,ENST00000478393,ENST00000539352  
ENST00000323927  
ENST00000402038  
ENST00000381055,ENST00000464680  
ENST00000392002  
ENST00000342960,ENST00000369338,ENST00000369339  
ENST00000335110,ENST00000394329  
ENST00000261483  
ENST00000278882,ENST00000358464,ENST00000439954,ENST00000278882,ENST00000358464,ENST00000  
ENST00000281815,ENST00000338347  
ENST00000557788  
ENST00000249007,ENST00000382088,ENST00000397468  
ENST00000421673  
ENST00000281815,ENST00000338347  
ENST00000342947,ENST00000409775,ENST00000409970,ENST00000419307,ENST00000545231  
ENST00000417545  
ENST00000356641,ENST00000397843,ENST00000532993

ENST00000342960,ENST00000490598  
ENST00000418749  
ENST00000299440,ENST00000534663  
ENST00000304514,ENST00000409886  
ENST00000439954  
ENST00000419039,ENST00000420871,ENST00000456556  
ENST00000489525  
ENST00000452611  
ENST00000390373  
ENST00000278882,ENST00000358464,ENST00000439954  
ENST00000204517  
ENST00000283351,ENST00000582539  
ENST00000252252  
ENST00000420699,ENST00000461153  
ENST00000303015,ENST00000520439,ENST00000522317  
ENST00000348028,ENST00000349350,ENST00000421100,ENST00000427578,ENST00000443370,ENST00000.  
ENST00000260356  
ENST00000355673,ENST00000431731,ENST00000547545  
ENST00000399682  
ENST00000391417  
ENST00000348028,ENST00000349350,ENST00000421100,ENST00000427578,ENST00000443370,ENST00000.  
ENST00000333891,ENST00000423517  
ENST00000263671,ENST00000376332,ENST00000528789,ENST00000534276  
ENST00000278882,ENST00000358464,ENST00000439954  
ENST00000281815,ENST00000338347  
ENST00000287647,ENST00000383807,ENST00000419585  
ENST00000379829  
ENST00000342960,ENST00000490598  
ENST00000330891,ENST00000488961,ENST00000553096  
ENST00000300976  
ENST00000390373  
ENST00000333244  
ENST00000252321  
ENST00000281815,ENST00000338347  
ENST00000419039,ENST00000420871,ENST00000456556  
ENST00000421673  
ENST00000332707  
ENST00000397056,ENST00000431010,ENST00000438284  
ENST00000419039,ENST00000420871,ENST00000456556  
ENST00000419039,ENST00000420871,ENST00000456556  
ENST00000278882,ENST00000358464,ENST00000439954  
ENST00000273541,ENST00000393292,ENST00000393295,ENST00000418265,ENST00000485703  
ENST00000257622,ENST00000358357,ENST00000395270,ENST00000434423,ENST00000446813  
ENST00000323927  
ENST00000340291,ENST00000396638,ENST00000472605,ENST00000475644,ENST00000484764  
ENST00000278882,ENST00000358464,ENST00000439954  
ENST00000304514,ENST00000409886

ENST00000335110,ENST00000394329  
ENST00000179882,ENST00000321680,ENST00000367480,ENST00000367481  
ENST00000376581  
ENST00000358970,ENST00000511306  
ENST00000420699,ENST00000461153  
ENST00000249007,ENST00000382088,ENST00000397468  
ENST00000391417  
ENST00000532254,ENST00000533640  
ENST00000439954  
ENST00000289153,ENST00000461451,ENST00000462898,ENST00000465581,ENST00000477593,ENST00000  
ENST00000557788  
ENST00000447027,ENST00000529681  
ENST00000452611  
ENST00000299440,ENST00000534663  
ENST00000456556  
ENST00000399682  
ENST00000348028,ENST00000349350,ENST00000421100,ENST00000427578,ENST00000443370,ENST00000  
ENST00000376296  
ENST00000376296  
ENST00000338347,ENST00000440491  
ENST00000356641,ENST00000397843,ENST00000532993  
ENST00000379829  
ENST00000281815,ENST00000338347  
ENST00000340291,ENST00000396638,ENST00000472605,ENST00000475644,ENST00000484764  
ENST00000330891,ENST00000488961,ENST00000553096  
ENST00000390373  
ENST00000300976  
ENST00000376324  
ENST00000397056,ENST00000431010,ENST00000438284  
ENST00000323927  
ENST00000447027,ENST00000529681  
ENST00000257622,ENST00000358357,ENST00000395270,ENST00000434423,ENST00000446813  
ENST00000332707  
ENST00000273541,ENST00000393292,ENST00000393295,ENST00000485703,ENST00000418265  
ENST00000333244  
ENST00000278882,ENST00000358464,ENST00000439954,ENST00000278882,ENST00000358464,ENST00000  
ENST00000376581  
ENST00000289153,ENST00000461451,ENST00000462898,ENST00000465581,ENST00000477593,ENST00000  
ENST00000287647,ENST00000383807,ENST00000419585  
ENST00000335110,ENST00000394329  
ENST00000179882,ENST00000321680,ENST00000367480,ENST00000367481  
ENST00000557788  
ENST00000249007,ENST00000382088,ENST00000397468  
ENST00000421673  
ENST00000281815,ENST00000338347  
ENST00000376296  
ENST00000278882,ENST00000358464,ENST00000439954

ENST00000356641,ENST00000397843,ENST00000532993  
ENST00000342960,ENST00000490598  
ENST00000456556  
ENST00000299440,ENST00000534663  
ENST00000338347,ENST00000440491  
ENST00000304514,ENST00000409886  
ENST00000439954  
ENST00000419039,ENST00000420871,ENST00000456556,ENST00000419039,ENST00000420871,ENST000004376296  
ENST00000419039,ENST00000420871,ENST00000456556  
ENST00000419039,ENST00000420871,ENST00000456556  
ENST00000452611  
ENST00000358970,ENST00000511306  
ENST00000252321  
ENST00000420699,ENST00000461153  
ENST00000348028,ENST00000349350,ENST00000421100,ENST00000427578,ENST00000443370,ENST00000432254,ENST00000533640  
ENST00000399682  
ENST00000391417  
ENST00000278314,ENST00000536068  
ENST00000263671,ENST00000376332,ENST00000528789,ENST00000534276  
ENST00000288168,ENST00000321489,ENST00000393550,ENST00000393567,ENST00000425945,ENST000004310271,ENST00000394965,ENST00000469224,ENST00000484952  
ENST00000278882,ENST00000358464,ENST00000439954  
ENST00000281815,ENST00000338347  
ENST00000253363,ENST00000338163,ENST00000361162,ENST00000407261,ENST00000528062  
ENST00000292432  
ENST00000375631  
ENST00000342960,ENST00000490598  
ENST00000335875  
ENST00000334304  
ENST00000300976  
ENST00000425825  
ENST00000265728,ENST00000413643,ENST00000430279  
ENST00000264775,ENST00000307259  
ENST00000381967,ENST00000505986,ENST00000515668  
ENST00000252321  
ENST00000281815,ENST00000338347  
ENST00000421673  
ENST00000358812  
ENST00000278882,ENST00000358464,ENST00000439954  
ENST00000358951  
ENST00000323927  
ENST00000231137  
ENST00000217961  
ENST00000398718  
ENST00000561462

ENST00000304514,ENST00000409886  
ENST00000278882,ENST00000358464,ENST00000439954  
ENST00000342992,ENST00000589042,ENST00000591111  
ENST00000223190,ENST00000311967,ENST00000393230,ENST00000393231,ENST00000393232,ENST00000:  
ENST00000335110,ENST00000394329  
ENST00000317593,ENST00000513010  
ENST00000242848,ENST00000282007  
ENST00000420699,ENST00000461153  
ENST00000249007,ENST00000382088,ENST00000397468  
ENST00000376572,ENST00000376576  
ENST00000391417  
ENST00000525693  
ENST00000346569,ENST00000369047,ENST00000369049  
ENST00000418063  
ENST00000225550  
ENST00000439954  
ENST00000257248,ENST00000541311  
ENST00000557788  
ENST00000422891  
ENST00000294008  
ENST00000418749  
ENST00000452611  
ENST00000299440,ENST00000534663  
ENST00000361306,ENST00000380602  
ENST00000223140,ENST00000467773,ENST00000483238  
ENST00000399682  
ENST00000278927,ENST00000417453  
ENST00000283550,ENST00000375699  
ENST00000409072  
ENST00000369592,ENST00000369603  
ENST00000356641,ENST00000397843,ENST00000532993  
ENST00000313173,ENST00000450510,ENST00000544999,ENST00000548663  
ENST00000320084,ENST00000336053,ENST00000420743,ENST00000430246,ENST00000449098,ENST00000:  
ENST00000302558,ENST00000409750  
ENST00000381967,ENST00000505986,ENST00000515668  
ENST00000335875  
ENST00000281815,ENST00000338347  
ENST00000257248,ENST00000541311  
ENST00000358812  
ENST00000425825  
ENST00000418063  
ENST00000292432  
ENST00000354464,ENST00000560155,ENST00000561462  
ENST00000300976  
ENST00000375631  
ENST00000376324  
ENST00000358951



ENST00000265728,ENST00000413643,ENST00000430279  
ENST00000253363,ENST00000338163,ENST00000361162,ENST00000407261,ENST00000528062  
ENST00000310271,ENST00000394965,ENST00000469224,ENST00000484952  
ENST00000323927  
ENST00000231137  
ENST00000317593,ENST00000513010  
ENST00000288168,ENST00000321489,ENST00000393550,ENST00000393567,ENST00000448089,ENST00000.  
ENST00000264775,ENST00000307259  
ENST00000294008  
ENST00000335110,ENST00000394329  
ENST00000223190,ENST00000311967,ENST00000393230,ENST00000393231,ENST00000393232,ENST00000.  
ENST00000376572,ENST00000376576  
ENST00000302558,ENST00000409750  
ENST00000278882,ENST00000358464,ENST00000439954,ENST00000278882,ENST00000358464,ENST00000.  
ENST00000225550  
ENST00000290200,ENST00000451065  
ENST00000557788  
ENST00000249007,ENST00000382088,ENST00000397468  
ENST00000342992,ENST00000589042,ENST00000591111  
ENST00000421673  
ENST00000281815,ENST00000338347  
ENST00000409072  
ENST00000398718  
ENST00000278882,ENST00000358464,ENST00000439954  
ENST00000356641,ENST00000397843,ENST00000532993  
ENST00000342960,ENST00000490598  
ENST00000418749  
ENST00000217961  
ENST00000299440,ENST00000534663  
ENST00000223140,ENST00000467773,ENST00000483238  
ENST00000304514,ENST00000409886  
ENST00000439954  
ENST00000334304  
ENST00000525693  
ENST00000278314,ENST00000536068  
ENST00000278927,ENST00000417453  
ENST00000361306,ENST00000380602  
ENST00000452611  
ENST00000346569,ENST00000369047,ENST00000369049  
ENST00000369592,ENST00000369603  
ENST00000278882,ENST00000358464,ENST00000439954,ENST00000278882,ENST00000358464,ENST00000.  
ENST00000313173,ENST00000450510,ENST00000544999,ENST00000548663  
ENST00000252321  
ENST00000420699,ENST00000461153  
ENST00000283550,ENST00000375699  
ENST00000399682  
ENST00000320084,ENST00000336053,ENST00000420743,ENST00000430246,ENST00000449098,ENST00000.

ENST00000391417  
ENST00000242848,ENST00000282007  
ENST00000263671,ENST00000376332,ENST00000528789,ENST00000534276  
ENST00000332836,ENST00000590200  
ENST00000368804  
ENST00000300976  
ENST00000179765,ENST00000379441,ENST00000549787,ENST00000549884,ENST00000551812  
ENST00000312026,ENST00000536263,ENST00000595559  
ENST00000252321  
ENST00000265713,ENST00000396930,ENST00000406337,ENST00000485568  
ENST00000421673  
ENST00000513506  
ENST00000323927  
ENST00000306151,ENST00000379439  
ENST00000376271  
ENST00000315957  
ENST00000340291,ENST00000396638,ENST00000472605,ENST00000475644,ENST00000484764  
ENST00000415827,ENST00000428826,ENST00000586867,ENST00000590078,ENST00000592743,ENST00000  
ENST00000315183,ENST00000395799,ENST00000450465  
ENST00000462323,ENST00000463781,ENST00000466475,ENST00000470451,ENST00000475231,ENST00000  
ENST00000335110,ENST00000394329  
ENST00000376271  
ENST00000348028,ENST00000349350,ENST00000421100,ENST00000427578,ENST00000443370,ENST00000  
ENST00000283474,ENST00000587615,ENST00000590891,ENST00000591401,ENST00000591897  
ENST00000327337,ENST00000543111  
ENST00000327564,ENST00000341671,ENST00000394713,ENST00000543378,ENST00000584368  
ENST00000348028,ENST00000349350,ENST00000421100,ENST00000427578,ENST00000443370,ENST00000  
ENST00000406386  
ENST00000327337,ENST00000543111  
ENST00000368764,ENST00000392667  
ENST00000327337,ENST00000543111  
ENST00000306151,ENST00000379439  
ENST00000299440,ENST00000534663  
ENST00000372950  
ENST00000278882,ENST00000358464  
ENST00000381285,ENST00000381318,ENST00000399367,ENST00000437442  
ENST00000462323,ENST00000463781,ENST00000466475,ENST00000470451,ENST00000475231,ENST00000  
ENST00000462323,ENST00000463781,ENST00000466475,ENST00000470451,ENST00000475231,ENST00000  
ENST00000306151,ENST00000379439  
ENST00000356641,ENST00000397843,ENST00000532993  
ENST00000359061,ENST00000441003  
ENST00000348028,ENST00000349350,ENST00000421100,ENST00000427578,ENST00000443370,ENST00000  
ENST00000382483  
ENST00000348028,ENST00000349350,ENST00000421100,ENST00000427578,ENST00000443370,ENST00000  
ENST00000340291,ENST00000396638,ENST00000472605,ENST00000475644,ENST00000484764  
ENST00000332836,ENST00000590200  
ENST00000300976

ENST00000376324  
ENST00000306151,ENST00000379439  
ENST00000315957  
ENST00000323927  
ENST00000376271,ENST00000376271  
ENST00000415827,ENST00000428826,ENST00000586867,ENST00000590078,ENST00000592743,ENST00000  
ENST00000312026,ENST00000536263,ENST00000595559  
ENST00000335110,ENST00000394329  
ENST00000462323,ENST00000463781,ENST00000466475,ENST00000470451,ENST00000475231,ENST00000  
ENST00000327337,ENST00000543111  
ENST00000306151,ENST00000379439  
ENST00000306151,ENST00000379439  
ENST00000179765,ENST00000379441,ENST00000549787,ENST00000549884,ENST00000551812  
ENST00000421673  
ENST00000327337,ENST00000543111  
ENST00000356641,ENST00000397843,ENST00000532993  
ENST00000327337,ENST00000543111  
ENST00000299440,ENST00000534663  
ENST00000382483  
ENST00000513506  
ENST00000327564,ENST00000341671,ENST00000394713,ENST00000543378,ENST00000584368  
ENST00000348028,ENST00000349350,ENST00000421100,ENST00000427578,ENST00000443370,ENST00000  
ENST00000372950  
ENST00000462323,ENST00000463781,ENST00000466475,ENST00000470451,ENST00000475231,ENST00000  
ENST00000348028,ENST00000349350,ENST00000421100,ENST00000427578,ENST00000443370,ENST00000  
ENST00000252321  
ENST00000381285,ENST00000381318,ENST00000399367,ENST00000437442  
ENST00000265713,ENST00000396930,ENST00000406337,ENST00000485568  
ENST00000462323,ENST00000463781,ENST00000466475,ENST00000470451,ENST00000475231,ENST00000  
ENST00000315183,ENST00000395799,ENST00000450465  
ENST00000359061,ENST00000441003  
ENST00000278882,ENST00000358464  
ENST00000348028,ENST00000349350,ENST00000421100,ENST00000427578,ENST00000443370,ENST00000  
ENST00000283474,ENST00000587615,ENST00000590891,ENST00000591401,ENST00000591897  
ENST00000348028,ENST00000349350,ENST00000421100,ENST00000427578,ENST00000443370,ENST00000  
ENST00000368764,ENST00000392667  
ENST00000368804  
ENST00000406386  
ENST00000376271  
ENST00000281154  
ENST00000264790,ENST00000394980,ENST00000508372  
ENST00000318063  
ENST00000333976  
ENST00000263915,ENST00000424693,ENST00000446413  
ENST00000367995,ENST00000367996  
ENST00000205890  
ENST00000329357

ENST00000576222  
ENST00000221567,ENST00000335056  
ENST00000284031,ENST00000426972,ENST00000535924,ENST00000539042,ENST00000542148  
ENST00000318063  
ENST00000333976  
ENST00000284031,ENST00000426972,ENST00000535924,ENST00000539042,ENST00000542148  
ENST00000221567,ENST00000335056  
ENST00000367995,ENST00000367996  
ENST00000281154  
ENST00000205890  
ENST00000264790,ENST00000394980,ENST00000508372  
ENST00000576222  
ENST00000263915,ENST00000424693,ENST00000446413  
ENST00000329357  
ENST00000252512,ENST00000433566,ENST00000434536,ENST00000517551  
ENST00000263125,ENST00000397176,ENST00000539722  
ENST00000358835,ENST00000368802,ENST00000368805,ENST00000435970  
ENST00000260187,ENST00000455332,ENST00000525735  
ENST00000409389,ENST00000428135  
ENST00000331597,ENST00000427714,ENST00000524388  
ENST00000388718  
ENST00000340840,ENST00000354325,ENST00000372917,ENST00000372922,ENST00000541110  
ENST00000389520,ENST00000424789  
ENST00000368320,ENST00000368321  
ENST00000298296,ENST00000409007,ENST00000443323,ENST00000536088,ENST00000544766  
ENST00000331320,ENST00000405646,ENST00000406191,ENST00000434050,ENST00000438610,ENST00000  
ENST00000278409  
ENST00000315571  
ENST00000331597,ENST00000427714,ENST00000524388  
ENST00000358835,ENST00000368802,ENST00000368805,ENST00000435970  
ENST00000263125,ENST00000397176,ENST00000539722  
ENST00000252512,ENST00000433566,ENST00000434536,ENST00000517551  
ENST00000389520,ENST00000424789  
ENST00000331320,ENST00000405646,ENST00000406191,ENST00000434050,ENST00000438610,ENST00000  
ENST00000278409  
ENST00000260187,ENST00000455332,ENST00000525735  
ENST00000368320,ENST00000368321  
ENST00000409389,ENST00000428135  
ENST00000340840,ENST00000354325,ENST00000372917,ENST00000372922,ENST00000541110  
ENST00000388718  
ENST00000298296,ENST00000409007,ENST00000443323,ENST00000536088,ENST00000544766  
ENST00000315571  
ENST00000295878,ENST00000491000,ENST00000545063  
ENST00000312412,ENST00000518004,ENST00000520237,ENST00000544906  
ENST00000394715,ENST00000608382  
ENST00000269814,ENST00000312090,ENST00000325464,ENST00000395808,ENST00000586017,ENST00000  
ENST00000244751

ENST00000400454  
ENST00000374388,ENST00000374403  
ENST00000258349,ENST00000367694,ENST00000367696  
ENST00000287239,ENST00000372711,ENST00000372714,ENST00000372724,ENST00000372725  
ENST00000056233  
ENST00000265425,ENST00000360488,ENST00000377850  
ENST00000378450,ENST00000378454  
ENST00000388726,ENST00000392650,ENST00000424778  
ENST00000299084  
ENST00000399799  
ENST00000264839,ENST00000348717,ENST00000370420,ENST00000401910,ENST00000425662,ENST00000  
ENST00000323959  
ENST00000374690,ENST00000396044,ENST00000504326,ENST00000514029  
ENST00000380171,ENST00000405489,ENST00000606999  
ENST00000299084  
ENST00000412074  
ENST00000242848,ENST00000282007  
ENST00000362097  
ENST00000269814,ENST00000312090,ENST00000325464,ENST00000395808,ENST00000586017,ENST00000  
ENST00000374388,ENST00000374403  
ENST00000295878,ENST00000491000,ENST00000545063  
ENST00000287239,ENST00000372711,ENST00000372714,ENST00000372724,ENST00000372725  
ENST00000258349,ENST00000367694,ENST00000367696  
ENST00000412074  
ENST00000394715,ENST00000608382  
ENST00000374690,ENST00000396044,ENST00000504326,ENST00000514029  
ENST00000299084  
ENST00000244751  
ENST00000400454  
ENST00000388726,ENST00000392650,ENST00000424778  
ENST00000299084  
ENST00000312412,ENST00000518004,ENST00000520237,ENST00000544906  
ENST00000323959  
ENST00000399799  
ENST00000265425,ENST00000360488,ENST00000377850  
ENST00000378450,ENST00000378454  
ENST00000056233  
ENST00000264839,ENST00000348717,ENST00000370420,ENST00000401910,ENST00000425662,ENST00000  
ENST00000362097  
ENST00000380171,ENST00000405489,ENST00000606999  
ENST00000242848,ENST00000282007  
ENST00000389173,ENST00000572933  
ENST00000306151,ENST00000379439  
ENST00000316073  
ENST00000342944,ENST00000357002  
ENST00000312412,ENST00000518004,ENST00000520237,ENST00000544906  
ENST00000439326

ENST00000233099,ENST00000354531,ENST00000425467  
ENST00000338977,ENST00000511833  
ENST00000300098  
ENST00000379214,ENST00000389858  
ENST00000304887,ENST00000413702,ENST00000456088  
ENST00000395385,ENST00000397126,ENST00000402377  
ENST00000415833,ENST00000424340,ENST00000517539,ENST00000528249  
ENST00000377386,ENST00000398263,ENST00000409015,ENST00000409232,ENST00000444342  
ENST00000341550,ENST00000396807,ENST00000412586,ENST00000444704,ENST00000446105  
ENST00000550760  
ENST00000348028,ENST00000349350,ENST00000421100,ENST00000427578,ENST00000443370,ENST00000  
ENST00000354957,ENST00000600738  
ENST00000376405,ENST00000376406  
ENST00000359788  
ENST00000342960  
ENST00000348028,ENST00000349350,ENST00000421100,ENST00000427578,ENST00000443370,ENST00000  
ENST00000388726,ENST00000392650,ENST00000424778  
ENST00000397126  
ENST00000399799  
ENST00000328963,ENST00000535250,ENST00000541564,ENST00000546057  
ENST00000216442,ENST00000554087,ENST00000554236,ENST00000555431,ENST00000555625,ENST00000  
ENST00000356929  
ENST00000354957,ENST00000600738  
ENST00000380171,ENST00000405489,ENST00000606999  
ENST00000355095,ENST00000423484  
ENST00000412074  
ENST00000331162  
ENST00000355095,ENST00000423484  
ENST00000377386,ENST00000398263,ENST00000409015,ENST00000409232,ENST00000444342  
ENST00000397126,ENST00000397126  
ENST00000343776,ENST00000397097  
ENST00000362065,ENST00000561594,ENST00000561607,ENST00000565280,ENST00000565466  
ENST00000354959,ENST00000356929,ENST00000397126,ENST00000594012,ENST00000595461,ENST00000  
ENST00000356929  
ENST00000439326  
ENST00000395385,ENST00000402377  
ENST00000233099,ENST00000354531,ENST00000425467  
ENST00000306151,ENST00000379439  
ENST00000338977,ENST00000511833  
ENST00000342944,ENST00000357002  
ENST00000389173,ENST00000572933  
ENST00000423703  
ENST00000300098  
ENST00000354957  
ENST00000412074  
ENST00000541564  
ENST00000356929

ENST00000550760  
ENST00000415833,ENST00000424340,ENST00000517539,ENST00000528249  
ENST00000216442,ENST00000554087,ENST00000554236,ENST00000555431,ENST00000555625,ENST00000:  
ENST00000355095,ENST00000423484,ENST00000355095,ENST00000423484  
ENST00000356929  
ENST00000388726,ENST00000392650,ENST00000424778  
ENST00000343776,ENST00000397097  
ENST00000354959,ENST00000594012,ENST00000595461,ENST00000598381  
ENST00000312412,ENST00000518004,ENST00000520237,ENST00000544906  
ENST00000399799  
ENST00000342960  
ENST00000376405,ENST00000376406  
ENST00000379214,ENST00000389858  
ENST00000397126  
ENST00000397126  
ENST00000348028,ENST00000349350,ENST00000421100,ENST00000427578,ENST00000443370,ENST00000:  
ENST00000362065,ENST00000561594,ENST00000561607,ENST00000565280,ENST00000565466  
ENST00000304887,ENST00000413702,ENST00000456088  
ENST00000377386,ENST00000398263,ENST00000409015,ENST00000409232,ENST00000444342,ENST00000:  
ENST00000331162  
ENST00000380171,ENST00000405489,ENST00000606999  
ENST00000359788  
ENST00000354957,ENST00000600738  
ENST00000316073  
ENST00000348028,ENST00000349350,ENST00000421100,ENST00000427578,ENST00000443370,ENST00000:  
ENST00000284476  
ENST00000268482  
ENST00000361193,ENST00000411502,ENST00000546047,ENST00000571215,ENST00000572725  
ENST00000400555,ENST00000400556,ENST00000580745,ENST00000581250,ENST00000582240,ENST00000:  
ENST00000301547  
ENST00000370791,ENST00000443751  
ENST00000217130,ENST00000369888,ENST00000450537  
ENST00000391571  
ENST00000380255,ENST00000380262,ENST00000563694,ENST00000565740,ENST00000575408,ENST00000:  
ENST00000263087  
ENST00000332509,ENST00000335539,ENST00000402064,ENST00000430886  
ENST00000256495  
ENST00000415833,ENST00000424340,ENST00000517539,ENST00000528249  
ENST00000344113,ENST00000358025,ENST00000554584  
ENST00000380113,ENST00000399838,ENST00000455664  
ENST00000389554  
ENST00000187397,ENST00000337271,ENST00000417925,ENST00000444190,ENST00000458225  
ENST00000352105,ENST00000439576,ENST00000559004,ENST00000561243  
ENST00000315891,ENST00000346785,ENST00000360370,ENST00000504035,ENST00000505996,ENST00000:  
ENST00000256552,ENST00000397795,ENST00000542188,ENST00000558445,ENST00000558768,ENST00000:  
ENST00000296871  
ENST00000281928

ENST00000304990,ENST00000396578  
ENST00000216500,ENST00000536410,ENST00000557185  
ENST00000262963,ENST00000348075,ENST00000353284,ENST00000357368,ENST00000372412,ENST00000:  
ENST00000271532  
ENST00000388726,ENST00000392650,ENST00000424778  
ENST00000399799  
ENST00000265636,ENST00000265637,ENST00000393799,ENST00000393800,ENST00000393801,ENST00000:  
ENST00000256737,ENST00000525139,ENST00000531568,ENST00000537978  
ENST00000421673  
ENST00000368804  
ENST00000188403,ENST00000321046,ENST00000392986,ENST00000548884,ENST00000551379  
ENST00000380171,ENST00000405489,ENST00000606999  
ENST00000319560  
ENST00000412074  
ENST00000376296  
ENST00000344113,ENST00000358025,ENST00000554584  
ENST00000361193,ENST00000411502,ENST00000546047,ENST00000571215,ENST00000572725  
ENST00000216500,ENST00000536410,ENST00000557185  
ENST00000400555,ENST00000400556,ENST00000580745,ENST00000581250,ENST00000582240,ENST00000:  
ENST00000304990,ENST00000396578  
ENST00000256495  
ENST00000284476  
ENST00000370791,ENST00000443751  
ENST00000263087  
ENST00000380113,ENST00000399838,ENST00000455664  
ENST00000187397,ENST00000337271,ENST00000417925,ENST00000444190,ENST00000458225  
ENST00000380255,ENST00000380262,ENST00000563694,ENST00000565740,ENST00000575408,ENST00000:  
ENST00000217130,ENST00000369888,ENST00000450537  
ENST00000412074  
ENST00000389554  
ENST00000391571  
ENST00000315891,ENST00000346785,ENST00000360370,ENST00000504035,ENST00000505996,ENST00000:  
ENST00000415833,ENST00000424340,ENST00000517539,ENST00000528249  
ENST00000388726,ENST00000392650,ENST00000424778  
ENST00000281928  
ENST00000352105,ENST00000439576,ENST00000559004,ENST00000561243  
ENST00000301547  
ENST00000262963,ENST00000348075,ENST00000353284,ENST00000357368,ENST00000372412,ENST00000:  
ENST00000188403,ENST00000321046,ENST00000392986,ENST00000548884,ENST00000551379  
ENST00000332509,ENST00000335539,ENST00000402064,ENST00000430886  
ENST00000271532  
ENST00000296871  
ENST00000256552,ENST00000397795,ENST00000542188,ENST00000558445,ENST00000558768,ENST00000:  
ENST00000399799  
ENST00000376296  
ENST00000421673  
ENST00000265636,ENST00000265637,ENST00000393799,ENST00000393800,ENST00000393801,ENST00000:



ENST00000256737,ENST00000525139,ENST00000531568,ENST00000537978  
ENST00000268482  
ENST00000319560  
ENST00000380171,ENST00000405489,ENST00000606999  
ENST00000368804  
ENST00000291726,ENST00000320838,ENST00000347619,ENST00000391806,ENST00000593490,ENST00000:  
ENST00000356504,ENST00000381620,ENST00000507069,ENST00000510861,ENST00000514090,ENST00000:  
ENST00000268482  
ENST00000400555,ENST00000400556,ENST00000580745,ENST00000581250,ENST00000582240,ENST00000:  
ENST00000369345,ENST00000369348,ENST00000369359,ENST00000526359,ENST00000528661,ENST00000:  
ENST00000207549,ENST00000412096  
ENST00000326270,ENST00000343388,ENST00000346027,ENST00000542523,ENST00000581041,ENST00000:  
ENST00000263087  
ENST00000256495  
ENST00000344113,ENST00000358025,ENST00000554584  
ENST00000380113,ENST00000399838,ENST00000455664  
ENST00000279230,ENST00000325234,ENST00000540288  
ENST00000187397,ENST00000337271,ENST00000417925,ENST00000444190,ENST00000458225  
ENST00000352105,ENST00000439576,ENST00000559004,ENST00000561243  
ENST00000315891,ENST00000346785,ENST00000360370,ENST00000504035,ENST00000505996,ENST00000:  
ENST00000256552,ENST00000397795,ENST00000542188,ENST00000558445,ENST00000558768,ENST00000:  
ENST00000296871  
ENST00000281928  
ENST00000304990,ENST00000396578  
ENST00000358047  
ENST00000454682  
ENST00000367482,ENST00000367483,ENST00000367485,ENST00000367486,ENST00000445192  
ENST00000375001  
ENST00000271532  
ENST00000388726,ENST00000392650,ENST00000424778  
ENST00000348028,ENST00000349350,ENST00000421100,ENST00000427578,ENST00000443370,ENST00000:  
ENST00000264436,ENST00000355733,ENST00000403045,ENST00000407644,ENST00000413157,ENST00000:  
ENST00000399799  
ENST00000265636,ENST00000265637,ENST00000393799,ENST00000393800,ENST00000393801,ENST00000:  
ENST00000368804  
ENST00000262462,ENST00000395266,ENST00000506176  
ENST00000188403,ENST00000321046,ENST00000392986,ENST00000548884,ENST00000551379  
ENST00000380171,ENST00000405489,ENST00000606999  
ENST00000319560  
ENST00000412074  
ENST00000458270,ENST00000501748,ENST00000526926  
ENST00000344113,ENST00000358025,ENST00000554584  
ENST00000356504,ENST00000381620,ENST00000507069,ENST00000510861,ENST00000514090,ENST00000:  
ENST00000400555,ENST00000400556,ENST00000580745,ENST00000581250,ENST00000582240,ENST00000:  
ENST00000304990,ENST00000396578  
ENST00000256495  
ENST00000291726,ENST00000320838,ENST00000347619,ENST00000391806,ENST00000593490,ENST00000:

ENST00000263087  
ENST00000380113,ENST00000399838,ENST00000455664  
ENST00000264436,ENST00000355733,ENST00000403045,ENST00000407644,ENST00000413157,ENST00000  
ENST00000262462,ENST00000395266,ENST00000506176  
ENST00000187397,ENST00000337271,ENST00000417925,ENST00000444190,ENST00000458225  
ENST00000207549,ENST00000412096  
ENST00000369345  
ENST00000412074  
ENST00000315891,ENST00000346785,ENST00000360370,ENST00000504035,ENST00000505996,ENST00000  
ENST00000326270,ENST00000343388,ENST00000346027,ENST00000542523,ENST00000581041,ENST00000  
ENST00000388726,ENST00000392650,ENST00000424778  
ENST00000279230,ENST00000325234,ENST00000540288  
ENST00000281928  
ENST00000375001  
ENST00000352105,ENST00000439576,ENST00000559004,ENST00000561243  
ENST00000458270,ENST00000501748,ENST00000526926  
ENST00000358047  
ENST00000188403,ENST00000321046,ENST00000392986,ENST00000548884,ENST00000551379  
ENST00000271532  
ENST00000296871  
ENST00000256552,ENST00000397795,ENST00000542188,ENST00000558445,ENST00000558768,ENST00000  
ENST00000399799  
ENST00000265636,ENST00000265637,ENST00000393799,ENST00000393800,ENST00000393801,ENST00000  
ENST00000268482  
ENST00000348028,ENST00000349350,ENST00000421100,ENST00000427578,ENST00000443370,ENST00000  
ENST00000367482,ENST00000367483,ENST00000367485,ENST00000367486,ENST00000445192  
ENST00000319560  
ENST00000380171,ENST00000405489,ENST00000606999  
ENST00000368804  
ENST00000454682  
ENST00000357311,ENST00000393651,ENST00000489828  
ENST00000159087,ENST00000597643  
ENST00000283195  
ENST00000315368,ENST00000505991,ENST00000510092  
ENST00000324103,ENST00000382687,ENST00000558468,ENST00000559275  
ENST00000354905  
ENST00000303824,ENST00000340726,ENST00000388740,ENST00000388741,ENST00000388742,ENST00000  
ENST00000216445,ENST00000422976,ENST00000526336,ENST00000526745,ENST00000529860,ENST00000  
ENST00000206423,ENST00000439685  
ENST00000251761,ENST00000396725  
ENST00000334686,ENST00000340059,ENST00000414191,ENST00000460012  
ENST00000284669,ENST00000513963,ENST00000554017  
ENST00000367104,ENST00000435180  
ENST00000233712,ENST00000393913,ENST00000410071,ENST00000410113,ENST00000432649,ENST00000  
ENST00000339762,ENST00000554729,ENST00000556826  
ENST00000277746  
ENST00000333646,ENST00000374080,ENST00000374102

ENST00000302303,ENST00000358730,ENST00000382004,ENST00000457373  
ENST00000343455,ENST00000393063,ENST00000526495,ENST00000527414,ENST00000541352  
ENST00000347108,ENST00000361156,ENST00000361396,ENST00000376829,ENST00000466569  
ENST00000194118,ENST00000432126  
ENST00000454872  
ENST00000357337,ENST00000407578,ENST00000544440  
ENST00000394576  
ENST00000320129,ENST00000519564  
ENST00000287652,ENST00000437082,ENST00000448281  
ENST00000328354,ENST00000348295,ENST00000382566,ENST00000382580,ENST00000398017,ENST00000  
ENST00000316562,ENST00000495692,ENST00000497424,ENST00000610179  
ENST00000371621,ENST00000541713  
ENST00000301547  
ENST00000583868  
ENST00000274400,ENST00000330280,ENST00000425596  
ENST00000338193,ENST00000549549,ENST00000550770  
ENST00000323434,ENST00000331302,ENST00000536489  
ENST00000254066,ENST00000394081,ENST00000394086,ENST00000394089,ENST00000425707,ENST00000  
ENST00000348581,ENST00000366548,ENST00000450748,ENST00000518483  
ENST00000320027,ENST00000380405,ENST00000380406,ENST00000429785,ENST00000445273  
ENST00000160713,ENST00000276737,ENST00000395297  
ENST00000324545,ENST00000378308  
ENST00000333188,ENST00000507777  
ENST00000278559,ENST00000456580,ENST00000529629  
ENST00000286800,ENST00000399921  
ENST00000360468,ENST00000430376,ENST00000431652,ENST00000557865,ENST00000559717  
ENST00000357409,ENST00000360280,ENST00000376634,ENST00000376636  
ENST00000288135,ENST00000412167  
ENST00000355202,ENST00000395835,ENST00000590670  
ENST00000295903,ENST00000498707  
ENST00000335093  
ENST00000303824,ENST00000340726,ENST00000388740,ENST00000388741,ENST00000388742,ENST00000  
ENST00000334686,ENST00000340059,ENST00000414191,ENST00000460012  
ENST00000334686,ENST00000340059,ENST00000414191,ENST00000460012  
ENST00000334686,ENST00000340059,ENST00000414191,ENST00000460012  
ENST00000159087,ENST00000597643  
ENST00000360468,ENST00000430376,ENST00000431652,ENST00000557865,ENST00000559717  
ENST00000316562,ENST00000495692,ENST00000497424,ENST00000610179  
ENST00000324545,ENST00000378308  
ENST00000194118,ENST00000432126  
ENST00000367101,ENST00000367102  
ENST00000357337,ENST00000407578,ENST00000544440  
ENST00000554017,ENST00000284669,ENST00000513963  
ENST00000160713,ENST00000276737,ENST00000395297  
ENST00000160713,ENST00000276737,ENST00000395297  
ENST00000160713,ENST00000276737,ENST00000395297  
ENST00000251761,ENST00000396725

ENST00000216445,ENST00000422976,ENST00000526336,ENST00000526745,ENST00000530417,ENST00000  
ENST00000338193,ENST00000549549,ENST00000550770  
ENST00000355202,ENST00000395835,ENST00000590670  
ENST00000286800,ENST00000399921  
ENST00000347108,ENST00000361156,ENST00000361396,ENST00000376829,ENST00000466569  
ENST00000302303,ENST00000358730,ENST00000382004,ENST00000457373  
ENST00000433028,ENST00000447421,ENST00000448511  
ENST00000357409,ENST00000360280,ENST00000376634,ENST00000376636  
ENST00000354905  
ENST00000315368,ENST00000505991,ENST00000510092  
ENST00000274400,ENST00000330280,ENST00000425596  
ENST00000454872  
ENST00000357311,ENST00000393651,ENST00000489828  
ENST00000283195  
ENST00000339762,ENST00000554729,ENST00000556826  
ENST00000278559,ENST00000456580,ENST00000529629  
ENST00000323434,ENST00000331302,ENST00000536489  
ENST00000324103,ENST00000382687,ENST00000559275,ENST00000558468  
ENST00000301547  
ENST00000254066,ENST00000394081,ENST00000394086,ENST00000394089,ENST00000425707,ENST00000  
ENST00000583868  
ENST00000320129,ENST00000519564  
ENST00000233712,ENST00000393913,ENST00000410071,ENST00000410113,ENST00000432649,ENST00000  
ENST00000333646,ENST00000374080,ENST00000374102  
ENST00000333188,ENST00000507777  
ENST00000206423,ENST00000439685  
ENST00000371621,ENST00000541713  
ENST00000437082,ENST00000287652,ENST00000448281  
ENST00000394576  
ENST00000277746  
ENST00000343455,ENST00000393063,ENST00000526495,ENST00000527414,ENST00000541352  
ENST00000295903,ENST00000498707  
ENST00000288135,ENST00000412167  
ENST00000320027,ENST00000380405,ENST00000380406,ENST00000429785,ENST00000445273  
ENST00000348581,ENST00000366548,ENST00000450748,ENST00000518483  
ENST00000335093  
ENST00000260569  
ENST00000263045,ENST00000354620,ENST00000371159,ENST00000393666,ENST00000423399,ENST00000  
ENST00000258770,ENST00000494076  
ENST00000332441,ENST00000361109,ENST00000376625,ENST00000389560,ENST00000392352,ENST00000  
ENST00000375592,ENST00000444116,ENST00000456164  
ENST00000295956,ENST00000348383,ENST00000357272,ENST00000358537,ENST00000419752,ENST00000  
ENST00000278882,ENST00000358464,ENST00000439954  
ENST00000358731  
ENST00000244891,ENST00000449290  
ENST00000339803,ENST00000379808,ENST00000523826,ENST00000524140,ENST00000549814,ENST00000  
ENST00000351839,ENST00000360384,ENST00000376263,ENST00000376264,ENST00000376281,ENST00000

ENST00000375654,ENST00000417199  
ENST00000339488  
ENST00000339865,ENST00000399455,ENST00000527733  
ENST00000368114,ENST00000368115  
ENST00000279477,ENST00000562014,ENST00000568365  
ENST00000288699,ENST00000401478  
ENST00000378867,ENST00000527487,ENST00000530639  
ENST00000595793  
ENST00000268720  
ENST00000309890,ENST00000352011,ENST00000359983,ENST00000397035,ENST00000397041,ENST00000304735  
ENST00000304735  
ENST00000375442  
ENST00000286485,ENST00000327040,ENST00000428502,ENST00000440756,ENST00000523619  
ENST00000309863,ENST00000409896  
ENST00000342595,ENST00000378220  
ENST00000328333,ENST00000454817  
ENST00000265838,ENST00000299355,ENST00000527942,ENST00000531813  
ENST00000264122,ENST00000405772  
ENST00000304735  
ENST00000258770,ENST00000494076  
ENST00000288699,ENST00000401478  
ENST00000375442  
ENST00000377990,ENST00000537589,ENST00000546106  
ENST00000286485,ENST00000327040,ENST00000428502,ENST00000440756,ENST00000523619  
ENST00000309890,ENST00000352011,ENST00000359983,ENST00000397035,ENST00000397041,ENST00000378867,ENST00000527487,ENST00000530639  
ENST00000339488  
ENST00000368114,ENST00000368115  
ENST00000244891,ENST00000449290  
ENST00000339865,ENST00000399455,ENST00000527733  
ENST00000332441,ENST00000361109,ENST00000376625,ENST00000389560,ENST00000392352,ENST00000295956,ENST00000348383,ENST00000357272,ENST00000358537,ENST00000419752,ENST00000309863,ENST00000409896  
ENST00000268720  
ENST00000375654,ENST00000417199  
ENST00000375592,ENST00000444116,ENST00000456164  
ENST00000457156  
ENST00000278882,ENST00000358464,ENST00000439954,ENST00000479318  
ENST00000263045,ENST00000354620,ENST00000371159,ENST00000393666,ENST00000423399,ENST00000328333,ENST00000454817  
ENST00000339803,ENST00000379808,ENST00000523826,ENST00000524140,ENST00000549814,ENST00000279477,ENST00000562014,ENST00000568365  
ENST00000358731  
ENST00000595793  
ENST00000265838,ENST00000299355,ENST00000531813  
ENST00000342595,ENST00000378220  
ENST00000264122,ENST00000405772

ENST00000281437  
ENST00000265052,ENST00000398101,ENST00000398104,ENST00000434178,ENST00000453507,ENST00000.  
ENST00000308664,ENST00000395494,ENST00000539276  
ENST00000358970  
ENST00000265056  
ENST00000288561,ENST00000473989  
ENST00000393923,ENST00000393925,ENST00000412622,ENST00000431670,ENST00000477695,ENST00000.  
ENST00000290239,ENST00000300278,ENST00000356577,ENST00000381679,ENST00000455528  
ENST00000293879,ENST00000315764,ENST00000547944,ENST00000549091  
ENST00000303635,ENST00000439411  
ENST00000265052,ENST00000398101,ENST00000398104,ENST00000434178,ENST00000453507,ENST00000.  
ENST00000308664,ENST00000395494,ENST00000539276  
ENST00000281437  
ENST00000393923,ENST00000393925,ENST00000412622,ENST00000431670,ENST00000477695,ENST00000.  
ENST00000288561,ENST00000473989  
ENST00000265056  
ENST00000290239,ENST00000300278,ENST00000356577,ENST00000381679,ENST00000455528  
ENST00000293879,ENST00000315764,ENST00000547944,ENST00000549091  
ENST00000358970  
ENST00000303635,ENST00000439411  
ENST00000278886,ENST00000422516  
ENST00000285279,ENST00000414113,ENST00000417399,ENST00000418904,ENST00000427700,ENST00000.  
ENST00000354197  
ENST00000303354,ENST00000375387,ENST00000409435,ENST00000409672  
ENST00000379655,ENST00000421376,ENST00000445690,ENST00000465878,ENST00000539578,ENST00000.  
ENST00000296474,ENST00000344206,ENST00000411578  
ENST00000261693,ENST00000339570,ENST00000376788,ENST00000415380,ENST00000540495,ENST00000.  
ENST00000368057,ENST00000368059  
ENST00000283351,ENST00000582539  
ENST00000264938,ENST00000514375  
ENST00000382584  
ENST00000306317,ENST00000424267,ENST00000517694  
ENST00000305202  
ENST00000343776,ENST00000397097,ENST00000440339  
ENST00000300619,ENST00000397082  
ENST00000319004,ENST00000576778  
ENST00000204801,ENST00000301357,ENST00000315591,ENST00000315599,ENST00000354397,ENST00000.  
ENST00000298198  
ENST00000333942,ENST00000354266,ENST00000358365,ENST00000394692,ENST00000545287,ENST00000.  
ENST00000327454,ENST00000378174,ENST00000505415,ENST00000539424  
ENST00000371741  
ENST00000240851,ENST00000418917,ENST00000463568,ENST00000476228,ENST00000479672,ENST00000.  
ENST00000409389,ENST00000428135  
ENST00000369219  
ENST00000356929  
ENST00000439326  
ENST00000397126

ENST00000427401,ENST00000594419  
ENST00000356929  
ENST00000251071,ENST00000298892,ENST00000308433,ENST00000395805,ENST00000417045,ENST00000  
ENST00000376463,ENST00000376499,ENST00000418319  
ENST00000274054,ENST00000422287  
ENST00000357443,ENST00000369644,ENST00000369645,ENST00000413052  
ENST00000344980,ENST00000419886  
ENST00000231021  
ENST00000397104,ENST00000596209  
ENST00000397121  
ENST00000334181  
ENST00000368488,ENST00000368491  
ENST00000251071,ENST00000298892,ENST00000308433,ENST00000395805,ENST00000417045,ENST00000  
ENST00000356929  
ENST00000378438,ENST00000436783,ENST00000535539,ENST00000535777  
ENST00000339241,ENST00000394339,ENST00000507703  
ENST00000260595,ENST00000312734,ENST00000402394,ENST00000404694,ENST00000405600  
ENST00000344363  
ENST00000328405,ENST00000452398  
ENST00000597761  
ENST00000377386,ENST00000398263,ENST00000409015,ENST00000409232,ENST00000444342  
ENST00000391413  
ENST00000394456,ENST00000429701,ENST00000593678  
ENST00000408964  
ENST00000285279,ENST00000414113,ENST00000417399,ENST00000418904,ENST00000427700,ENST00000  
ENST00000427401,ENST00000594419  
ENST00000409389,ENST00000428135  
ENST00000357443,ENST00000369644,ENST00000369645,ENST00000413052  
ENST00000264938,ENST00000514375  
ENST00000334181  
ENST00000240851,ENST00000418917,ENST00000463568,ENST00000476228,ENST00000479672,ENST00000  
ENST00000344363  
ENST00000339241,ENST00000394339,ENST00000507703  
ENST00000278886,ENST00000422516  
ENST00000378438,ENST00000436783,ENST00000535539,ENST00000535777  
ENST00000397121  
ENST00000397126  
ENST00000439326  
ENST00000328405,ENST00000452398  
ENST00000204801,ENST00000301357,ENST00000315591,ENST00000315599,ENST00000354397,ENST00000  
ENST00000300619,ENST00000397082  
ENST00000327454,ENST00000378174,ENST00000505415,ENST00000539424  
ENST00000397104,ENST00000596209  
ENST00000261693,ENST00000339570,ENST00000376788,ENST00000415380,ENST00000540495,ENST00000  
ENST00000251071,ENST00000298892,ENST00000308433,ENST00000395805,ENST00000417045,ENST00000  
ENST00000296474,ENST00000344206,ENST00000411578  
ENST00000368057,ENST00000368059

ENST00000344980,ENST00000419886  
ENST00000221735,ENST00000347466,ENST00000415379,ENST00000424930,ENST00000426954,ENST00000.  
ENST00000303354,ENST00000375387,ENST00000409435,ENST00000409672  
ENST00000274054,ENST00000422287  
ENST00000356929  
ENST00000382584  
ENST00000305202  
ENST00000333942,ENST00000354266,ENST00000358365,ENST00000394692,ENST00000545287,ENST00000.  
ENST00000356929  
ENST00000343776,ENST00000397097  
ENST00000231021  
ENST00000369219  
ENST00000283351,ENST00000582539  
ENST00000597761  
ENST00000377386,ENST00000398263,ENST00000409015,ENST00000409232,ENST00000444342  
ENST00000376463,ENST00000376499,ENST00000418319  
ENST00000371741  
ENST00000356929  
ENST00000306317,ENST00000424267,ENST00000517694  
ENST00000319004,ENST00000576778  
ENST00000394456,ENST00000429701,ENST00000593678  
ENST00000260595,ENST00000312734,ENST00000402394,ENST00000404694,ENST00000405600  
ENST00000379655,ENST00000421376,ENST00000445690,ENST00000465878,ENST00000539578,ENST00000.  
ENST00000298198  
ENST00000368488,ENST00000368491  
ENST00000408964  
ENST00000391413  
ENST00000266483  
ENST00000297826,ENST00000374469,ENST00000401783  
ENST00000285279,ENST00000414113,ENST00000417399,ENST00000418904,ENST00000427700,ENST00000.  
ENST00000329322,ENST00000379946  
ENST00000358746  
ENST00000371030  
ENST00000303071,ENST00000303113,ENST00000432378,ENST00000453626  
ENST00000285900,ENST00000340592,ENST00000448073,ENST00000518142,ENST00000518783,ENST00000.  
ENST00000328600  
ENST00000328381  
ENST00000264183,ENST00000349213,ENST00000366603,ENST00000418304,ENST00000421364  
ENST00000005226  
ENST00000306317,ENST00000424267,ENST00000517694  
ENST00000265727,ENST00000315984,ENST00000398201,ENST00000398203,ENST00000398204,ENST00000.  
ENST00000324048,ENST00000336715,ENST00000368879,ENST00000449313  
ENST00000269080,ENST00000430352,ENST00000586539  
ENST00000240851,ENST00000418917,ENST00000463568,ENST00000476228,ENST00000479672,ENST00000.  
ENST00000242804,ENST00000424168,ENST00000438182  
ENST00000427522,ENST00000467148  
ENST00000335281,ENST00000553432,ENST00000554736,ENST00000555472,ENST00000556752,ENST00000.



ENST00000344119,ENST00000371506,ENST00000472938  
ENST00000357115,ENST00000510413,ENST00000535741  
ENST00000264552,ENST00000587845,ENST00000589978  
ENST00000242804,ENST00000424168,ENST00000438182  
ENST00000449082  
ENST00000587639,ENST00000589061,ENST00000589103,ENST00000590643  
ENST00000326587,ENST00000375695,ENST00000375722,ENST00000375772  
ENST00000303961,ENST00000406058,ENST00000593726,ENST00000593972,ENST00000598654,ENST00000  
ENST00000367184  
ENST00000273666,ENST00000471262,ENST00000471454  
ENST00000260130,ENST00000413219,ENST00000422546,ENST00000424270,ENST00000447182,ENST00000  
ENST00000294256,ENST00000307289,ENST00000377190,ENST00000526060  
ENST00000435989  
ENST00000391413  
ENST00000320246,ENST00000373596,ENST00000373600,ENST00000373603,ENST00000394199,ENST00000  
ENST00000303354,ENST00000375387,ENST00000409435,ENST00000409672  
ENST00000286091,ENST00000413966  
ENST00000391413  
ENST00000427522,ENST00000467148  
ENST00000285279,ENST00000414113,ENST00000417399,ENST00000418904,ENST00000427700,ENST00000  
ENST00000005226  
ENST00000303071,ENST00000303113,ENST00000432378,ENST00000453626  
ENST00000240851,ENST00000418917,ENST00000463568,ENST00000476228,ENST00000479672,ENST00000  
ENST00000285900,ENST00000340592,ENST00000448073,ENST00000518142,ENST00000518783,ENST00000  
ENST00000358746  
ENST00000264183,ENST00000349213,ENST00000366603,ENST00000418304,ENST00000421364  
ENST00000329322,ENST00000379946  
ENST00000371030  
ENST00000328600  
ENST00000449082  
ENST00000315984  
ENST00000294256,ENST00000307289,ENST00000377190,ENST00000526060  
ENST00000297826,ENST00000374469,ENST00000401783  
ENST00000266483  
ENST00000242804,ENST00000424168,ENST00000438182,ENST00000242804,ENST00000424168,ENST00000  
ENST00000367184  
ENST00000435989  
ENST00000371506,ENST00000472938  
ENST00000326587,ENST00000375695,ENST00000375722,ENST00000375772  
ENST00000587639,ENST00000589061,ENST00000589103,ENST00000590643  
ENST00000269080,ENST00000430352,ENST00000586539  
ENST00000306317,ENST00000424267,ENST00000517694  
ENST00000273666,ENST00000471262,ENST00000471454  
ENST00000303354,ENST00000375387,ENST00000409435,ENST00000409672  
ENST00000357115,ENST00000508606,ENST00000509835,ENST00000510413,ENST00000535741  
ENST00000320246,ENST00000373596,ENST00000373600,ENST00000373603,ENST00000394199,ENST00000  
ENST00000328381

ENST00000260130,ENST00000413219,ENST00000422546,ENST00000424270,ENST00000447182,ENST00000.  
ENST00000335281,ENST00000553432,ENST00000554736,ENST00000555472,ENST00000556752,ENST00000.  
ENST00000303961,ENST00000406058,ENST00000593726,ENST00000593972,ENST00000594380,ENST00000.  
ENST00000324048,ENST00000336715,ENST00000368879,ENST00000449313  
ENST00000391413  
ENST00000264552,ENST00000587845,ENST00000589978  
ENST00000391413  
ENST00000286091,ENST00000413966  
ENST00000348028,ENST00000349350,ENST00000421100,ENST00000427578,ENST00000443370,ENST00000.  
ENST00000287380,ENST00000309336,ENST00000327098,ENST00000378080,ENST00000518805,ENST00000.  
ENST00000328354,ENST00000348295,ENST00000382578,ENST00000382580,ENST00000402731,ENST00000.  
ENST00000375871  
ENST00000256646  
ENST00000344859,ENST00000362074,ENST00000369340,ENST00000468030  
ENST00000380152,ENST00000544455  
ENST00000361899  
ENST00000287380,ENST00000309336,ENST00000327098,ENST00000378080,ENST00000518805,ENST00000.  
ENST00000348028,ENST00000349350,ENST00000421100,ENST00000427578,ENST00000443370,ENST00000.  
ENST00000328354,ENST00000348295,ENST00000382578,ENST00000382580,ENST00000402731,ENST00000.  
ENST00000361899  
ENST00000256646  
ENST00000325303,ENST00000336654,ENST00000375883,ENST00000605159  
ENST00000380152,ENST00000544455  
ENST00000344859,ENST00000362074,ENST00000369340,ENST00000468030  
ENST00000361543,ENST00000361781  
ENST00000315870,ENST00000431467  
ENST00000338949,ENST00000343253,ENST00000401026,ENST00000455267,ENST00000557479  
ENST00000343769  
ENST00000399686,ENST00000413704  
ENST00000310346,ENST00000349716,ENST00000405440,ENST00000526441  
ENST00000283415,ENST00000475622  
ENST00000378832,ENST00000527145  
ENST00000391571  
ENST00000433653,ENST00000486074  
ENST00000356287,ENST00000405093  
ENST00000322954,ENST00000379983,ENST00000539319,ENST00000560441  
ENST00000361505  
ENST00000361538,ENST00000380118,ENST00000380125,ENST00000413766,ENST00000465828  
ENST00000355636  
ENST00000261716,ENST00000536202  
ENST00000261716,ENST00000536202  
ENST00000311172,ENST00000409263,ENST00000409314,ENST00000409418,ENST00000458644  
ENST00000297540  
ENST00000358047  
ENST00000272879,ENST00000286186,ENST00000313728,ENST00000346817,ENST00000360132,ENST00000.  
ENST00000343769  
ENST00000361505

ENST00000378832,ENST00000527145  
ENST00000283415,ENST00000475622  
ENST00000391571  
ENST00000338949,ENST00000343253,ENST00000401026,ENST00000455267,ENST00000557479  
ENST00000261716,ENST00000536202,ENST00000261716,ENST00000536202  
ENST00000361543,ENST00000361781  
ENST00000315870,ENST00000431467  
ENST00000361538,ENST00000380118,ENST00000380125,ENST00000413766,ENST00000465828  
ENST00000310346,ENST00000349716,ENST00000405440,ENST00000526441  
ENST00000373880  
ENST00000302463,ENST00000399686,ENST00000402198,ENST00000402466,ENST00000406341,ENST00000  
ENST00000355636  
ENST00000322954,ENST00000379983,ENST00000539319,ENST00000560441  
ENST00000297540  
ENST00000356287,ENST00000405093  
ENST00000358047  
ENST00000311172,ENST00000409263,ENST00000409314,ENST00000409418,ENST00000458644  
ENST00000272879,ENST00000286186,ENST00000313728,ENST00000346817,ENST00000360132,ENST00000  
ENST00000266505,ENST00000435379,ENST00000447925,ENST00000534932,ENST00000538330,ENST00000  
ENST00000282701  
ENST00000255674,ENST00000437017,ENST00000454359,ENST00000583043  
ENST00000230173,ENST00000296932,ENST00000367608,ENST00000367609  
ENST00000263923  
ENST00000373563,ENST00000373566,ENST00000409196,ENST00000409451,ENST00000409480,ENST00000  
ENST00000368096  
ENST00000307662,ENST00000394243,ENST00000519664,ENST00000522122  
ENST00000313382,ENST00000369354,ENST00000369356,ENST00000369359,ENST00000530740  
ENST00000531461  
ENST00000335750,ENST00000554719,ENST00000554738  
ENST00000578026  
ENST00000369950,ENST00000369963  
ENST00000273432,ENST00000474524  
ENST00000371566,ENST00000371568  
ENST00000572129  
ENST00000282499,ENST00000393127,ENST00000525187,ENST00000530497  
ENST00000264661,ENST00000607371  
ENST00000263798,ENST00000559066  
ENST00000360870  
ENST00000376048  
ENST00000290866,ENST00000428043  
ENST00000360133,ENST00000443188,ENST00000589093,ENST00000589824,ENST00000592953  
ENST00000261833,ENST00000392521  
ENST00000379407,ENST00000379409,ENST00000379410  
ENST00000240189  
ENST00000328354,ENST00000348295,ENST00000382578,ENST00000382580,ENST00000402731,ENST00000  
ENST00000455694  
ENST00000284154,ENST00000395635

ENST00000318682,ENST00000504597,ENST00000510660  
ENST00000255674,ENST00000437017,ENST00000454359,ENST00000583043  
ENST00000264661,ENST00000607371  
ENST00000368096  
ENST00000360133,ENST00000443188,ENST00000589093,ENST00000589824,ENST00000592953  
ENST00000371566,ENST00000371568  
ENST00000282499,ENST00000393127,ENST00000525187,ENST00000530497  
ENST00000335750,ENST00000554719,ENST00000554738  
ENST00000261833,ENST00000392521  
ENST00000273432,ENST00000474524  
ENST00000531461  
ENST00000263923  
ENST00000263798,ENST00000559066  
ENST00000284154,ENST00000395635  
ENST00000369950  
ENST00000373563,ENST00000373566,ENST00000409196,ENST00000409451,ENST00000409480,ENST00000  
ENST00000578026  
ENST00000240189  
ENST00000230173,ENST00000296932,ENST00000367608,ENST00000367609  
ENST00000328354,ENST00000348295,ENST00000382578,ENST00000382580,ENST00000402731,ENST00000  
ENST00000282701  
ENST00000266505,ENST00000435379,ENST00000447925,ENST00000534932,ENST00000538330,ENST00000  
ENST00000313382,ENST00000369354,ENST00000369356,ENST00000369359,ENST00000530740  
ENST00000290866,ENST00000428043  
ENST00000360870  
ENST00000455694  
ENST00000572129  
ENST00000307662,ENST00000394243,ENST00000519664,ENST00000522122  
ENST00000379407,ENST00000379409,ENST00000379410  
ENST00000376048  
ENST00000318682,ENST00000504597,ENST00000510660  
ENST00000323022,ENST00000376251,ENST00000376265  
ENST00000357438  
ENST00000221265,ENST00000221266,ENST00000416728,ENST00000595564  
ENST00000399080  
ENST00000316707,ENST00000411767,ENST00000427191,ENST00000436978,ENST00000511467  
ENST00000361735,ENST00000362019,ENST00000367737,ENST00000458517  
ENST00000348165,ENST00000389103  
ENST00000320574,ENST00000535270,ENST00000537064  
ENST00000320934  
ENST00000337990,ENST00000374839,ENST00000447788,ENST00000545618  
ENST00000329800,ENST00000330675,ENST00000358024,ENST00000545499  
ENST00000261726  
ENST00000255416  
ENST00000359428,ENST00000451030  
ENST00000314595,ENST00000381227,ENST00000431623,ENST00000441246  
ENST00000302196,ENST00000378993

ENST00000339901,ENST00000375807,ENST00000534113  
ENST00000296658  
ENST00000399080  
ENST00000329800,ENST00000330675,ENST00000358024,ENST00000545499  
ENST00000323022,ENST00000376251,ENST00000376265  
ENST00000255416  
ENST00000261726  
ENST00000320934  
ENST00000320574,ENST00000535270,ENST00000537064,ENST00000539006  
ENST00000359428,ENST00000451030  
ENST00000221265,ENST00000221266,ENST00000416728,ENST00000595564  
ENST00000357438  
ENST00000314595,ENST00000381227,ENST00000431623,ENST00000441246  
ENST00000348165,ENST00000389103  
ENST00000316707,ENST00000411767,ENST00000427191,ENST00000436978,ENST00000511467  
ENST00000361735,ENST00000362019,ENST00000367737,ENST00000458517  
ENST00000337990,ENST00000374839,ENST00000447788,ENST00000545618  
ENST00000339901,ENST00000375807,ENST00000534113  
ENST00000302196,ENST00000378993  
ENST00000296658  
ENST00000297404,ENST00000524391  
ENST00000367482,ENST00000367483,ENST00000367485,ENST00000367486,ENST00000445192  
ENST00000492446  
ENST00000353801,ENST00000371554,ENST00000371646  
ENST00000306151,ENST00000379439  
ENST00000263413,ENST00000337836  
ENST00000370565  
ENST00000240189  
ENST00000337057,ENST00000368128,ENST00000524581,ENST00000527411,ENST00000529208  
ENST00000437584,ENST00000535591  
ENST00000448514,ENST00000480559  
ENST00000306858  
ENST00000258729  
ENST00000371477  
ENST00000452611  
ENST00000268624,ENST00000315906  
ENST00000412090,ENST00000412090  
ENST00000240189  
ENST00000445890,ENST00000528282  
ENST00000437584,ENST00000535591  
ENST00000258729  
ENST00000492446  
ENST00000371477  
ENST00000448514,ENST00000480559  
ENST00000268624,ENST00000315906  
ENST00000353801,ENST00000371554,ENST00000371646  
ENST00000297404,ENST00000524391

ENST00000306151,ENST00000379439  
ENST00000306858  
ENST00000370565  
ENST00000263413,ENST00000337836  
ENST00000452611  
ENST00000367482,ENST00000367483,ENST00000367485,ENST00000367486,ENST00000445192  
ENST00000412090  
ENST00000541274  
ENST00000361217,ENST00000368646  
ENST00000266509,ENST00000381552,ENST00000545102,ENST00000545604  
ENST00000369338  
ENST00000454682  
ENST00000257622,ENST00000358357,ENST00000395270,ENST00000434423,ENST00000446813  
ENST00000342947,ENST00000409775,ENST00000409970,ENST00000419307,ENST00000545231  
ENST00000425945  
ENST00000376767  
ENST00000437584,ENST00000535591  
ENST00000361229,ENST00000372735,ENST00000447531,ENST00000448867,ENST00000457056  
ENST00000346061,ENST00000418749  
ENST00000295321,ENST00000409725,ENST00000455721  
ENST00000257622,ENST00000358357,ENST00000395270,ENST00000434423,ENST00000446813  
ENST00000342947,ENST00000409775,ENST00000409970,ENST00000419307,ENST00000545231  
ENST00000454682  
ENST00000361217,ENST00000368646  
ENST00000266509,ENST00000381552,ENST00000545102,ENST00000545604  
ENST00000437584,ENST00000535591  
ENST00000369338  
ENST00000425945  
ENST00000376767  
ENST00000541274  
ENST00000361229,ENST00000372735,ENST00000447531,ENST00000448867,ENST00000457056  
ENST00000295321,ENST00000409725,ENST00000455721  
ENST00000346061,ENST00000418749  
ENST00000346753,ENST00000381792,ENST00000406725,ENST00000406856,ENST00000423761,ENST00000  
ENST00000322569,ENST00000394182,ENST00000548629  
ENST00000262189,ENST00000355193,ENST00000558084  
ENST00000304820  
ENST00000244336  
ENST00000279575,ENST00000535904  
ENST00000252723  
ENST00000314756,ENST00000393020,ENST00000429951,ENST00000442859,ENST00000455306,ENST00000  
ENST00000266718  
ENST00000356025,ENST00000358771,ENST00000400068  
ENST00000279575,ENST00000535904  
ENST00000298396,ENST00000376895  
ENST00000266718  
ENST00000304820

ENST00000346753,ENST00000381792,ENST00000406725,ENST00000406856,ENST00000423761,ENST000004252723  
ENST00000262189,ENST00000355193,ENST00000558084  
ENST00000314756,ENST00000393020,ENST00000429951,ENST00000442859,ENST00000455306,ENST00000458629  
ENST00000322569,ENST00000394182,ENST00000548629  
ENST00000356025,ENST00000358771,ENST00000400068  
ENST00000298396,ENST00000376895  
ENST00000244336  
ENST00000279575,ENST00000535904,ENST00000279575,ENST00000535904  
ENST00000374672  
ENST00000351698  
ENST00000360439,ENST00000394947,ENST00000394949  
ENST00000293851,ENST00000570702  
ENST00000287936,ENST00000343975,ENST00000511206,ENST00000511986  
ENST00000368081,ENST00000477338  
ENST00000262032,ENST00000431367,ENST00000547167,ENST00000547791  
ENST00000234420,ENST00000538136,ENST00000540021  
ENST00000284674  
ENST00000326181  
ENST00000361351,ENST00000395081,ENST00000564488,ENST00000565130,ENST00000565335,ENST00000565733  
ENST00000279573,ENST00000381842,ENST00000538488  
ENST00000412585,ENST00000434333  
ENST00000390658  
ENST00000266509,ENST00000381552,ENST00000540354,ENST00000545102,ENST00000545604  
ENST00000272203,ENST00000414478  
ENST00000407184  
ENST00000371117  
ENST00000309263,ENST00000457346,ENST00000520467  
ENST00000261292,ENST00000577628,ENST00000580036  
ENST00000361351,ENST00000395081,ENST00000564488,ENST00000565335,ENST00000565494,ENST00000565733  
ENST00000284674  
ENST00000287936,ENST00000343975,ENST00000511206,ENST00000511986  
ENST00000326181  
ENST00000261292,ENST00000577628,ENST00000580036  
ENST00000390658  
ENST00000272203,ENST00000414478  
ENST00000266509,ENST00000381552,ENST00000540354,ENST00000545102,ENST00000545604  
ENST00000371117  
ENST00000412585,ENST00000434333  
ENST00000293851,ENST00000570702  
ENST00000360439,ENST00000394947,ENST00000394949  
ENST00000234420,ENST00000538136,ENST00000540021  
ENST00000351698  
ENST00000351698  
ENST00000368081,ENST00000477338  
ENST00000407184  
ENST00000309263,ENST00000457346,ENST00000520467

ENST00000262032,ENST00000431367,ENST00000547167,ENST00000547791  
ENST00000374672  
ENST00000279573,ENST00000381842,ENST00000538488  
ENST00000389156,ENST00000513277  
ENST00000276449  
ENST00000309838  
ENST00000379388  
ENST00000338305  
ENST00000395925  
ENST00000259037,ENST00000359944,ENST00000468210,ENST00000472629,ENST00000493866  
ENST00000314595,ENST00000381227,ENST00000431623,ENST00000441246  
ENST00000519479  
ENST00000343118,ENST00000380618,ENST00000380620,ENST00000398714  
ENST00000218507,ENST00000372926,ENST00000372927,ENST00000423383  
ENST00000358906,ENST00000538780  
ENST00000380151  
ENST00000338305  
ENST00000338305  
ENST00000338305  
ENST00000338305  
ENST00000259037,ENST00000359944,ENST00000468210,ENST00000472629,ENST00000493866  
ENST00000519479  
ENST00000358906,ENST00000538780  
ENST00000314595,ENST00000381227,ENST00000431623,ENST00000441246  
ENST00000389156  
ENST00000276449  
ENST00000380151  
ENST00000218507,ENST00000372926,ENST00000372927,ENST00000423383  
ENST00000309838  
ENST00000395925  
ENST00000379388  
ENST00000343118,ENST00000380618,ENST00000380620,ENST00000398714  
ENST00000310260,ENST00000355485,ENST00000369509,ENST00000369510  
ENST00000316770  
ENST00000334961,ENST00000338641,ENST00000353887,ENST00000361166,ENST00000361452,ENST00000  
ENST00000412468  
ENST00000313401  
ENST00000359865  
ENST00000330854,ENST00000337018,ENST00000452918,ENST00000456085,ENST00000594773,ENST00000  
ENST00000396073  
ENST00000335257,ENST00000581322  
ENST00000390613  
ENST00000333244  
ENST00000380206  
ENST00000378024  
ENST00000547628,ENST00000602107  
ENST00000334163,ENST00000369294



ENST00000306151,ENST00000379439  
ENST00000266671,ENST00000602540  
ENST00000578713,ENST00000584755  
ENST00000336592,ENST00000371322,ENST00000404115  
ENST00000306908,ENST00000523428  
ENST00000389467,ENST00000446231  
ENST00000316073  
ENST00000368804  
ENST00000221214,ENST00000456763,ENST00000457542,ENST00000505373,ENST00000510535,ENST00000  
ENST00000221214,ENST00000456763,ENST00000457542,ENST00000505373,ENST00000510535,ENST00000  
ENST00000330854,ENST00000337018,ENST00000452918,ENST00000456085,ENST00000594773,ENST00000  
ENST00000412468  
ENST00000306908,ENST00000523428  
ENST00000316770  
ENST00000310260,ENST00000355485,ENST00000369509,ENST00000369510  
ENST00000380206  
ENST00000578713,ENST00000584755  
ENST00000547628,ENST00000602107  
ENST00000333244  
ENST00000335257,ENST00000581322  
ENST00000334961,ENST00000338641,ENST00000353887,ENST00000361166,ENST00000361452,ENST00000  
ENST00000313401  
ENST00000334163,ENST00000369294  
ENST00000378024  
ENST00000390613  
ENST00000266671,ENST00000602540  
ENST00000359865  
ENST00000336592,ENST00000371322,ENST00000404115  
ENST00000306151,ENST00000379439  
ENST00000396073  
ENST00000368804  
ENST00000389467,ENST00000446231  
ENST00000316073  
ENST00000395385,ENST00000402377  
ENST00000334063  
ENST00000205890  
ENST00000333535,ENST00000413689,ENST00000414099,ENST00000423572,ENST00000425664,ENST00000  
ENST00000278520,ENST00000423339,ENST00000542662  
ENST00000342386,ENST00000375940,ENST00000375946  
ENST00000335552  
ENST00000320892  
ENST00000303843,ENST00000357277  
ENST00000382975,ENST00000382977,ENST00000382978,ENST00000400103,ENST00000400230,ENST00000  
ENST00000368005,ENST00000368006,ENST00000392188,ENST00000458050,ENST00000464113,ENST00000  
ENST00000293725  
ENST00000479318  
ENST00000276202,ENST00000276204

ENST00000318217,ENST00000394649,ENST00000579584  
ENST00000596143,ENST00000600435  
ENST00000409088,ENST00000409093,ENST00000409282,ENST00000409884,ENST00000409911  
ENST00000199814,ENST00000447771,ENST00000540000  
ENST00000361727  
ENST00000372492,ENST00000528956  
ENST00000318220,ENST00000318249,ENST00000342104,ENST00000434838,ENST00000454000  
ENST00000283943,ENST00000389044,ENST00000409677,ENST00000428959,ENST00000430954,ENST00000  
ENST00000264895  
ENST00000342292  
ENST00000349310,ENST00000402615,ENST00000407796,ENST00000554581,ENST00000554848,ENST00000  
ENST00000307731,ENST00000368932  
ENST00000278882,ENST00000358464,ENST00000439954  
ENST00000233668,ENST00000409429  
ENST00000288025,ENST00000570293  
ENST00000525964,ENST00000534532,ENST00000534548  
ENST00000323348,ENST00000409849,ENST00000410034  
ENST00000418967,ENST00000435122  
ENST00000326181  
ENST00000316073  
ENST00000373695,ENST00000373696  
ENST00000388718  
ENST00000306591,ENST00000322914,ENST00000322933,ENST00000392467,ENST00000589553,ENST00000  
ENST00000369784,ENST00000487146,ENST00000602849  
ENST00000344293  
ENST00000349310,ENST00000402615,ENST00000407796,ENST00000554581,ENST00000554848,ENST00000  
ENST00000303843,ENST00000357277  
ENST00000333535,ENST00000413689,ENST00000414099,ENST00000423572,ENST00000425664,ENST00000  
ENST00000278882,ENST00000358464,ENST00000439954,ENST00000479318,ENST00000278882,ENST00000  
ENST00000323348,ENST00000409849,ENST00000410034  
ENST00000382975,ENST00000382977,ENST00000382978,ENST00000400103,ENST00000400230,ENST00000  
ENST00000372492,ENST00000528956  
ENST00000318217,ENST00000394649,ENST00000579584  
ENST00000368005,ENST00000368006,ENST00000392188,ENST00000458050,ENST00000464113,ENST00000  
ENST00000418967,ENST00000435122  
ENST00000320892  
ENST00000293725  
ENST00000335552  
ENST00000409088,ENST00000409093,ENST00000409282,ENST00000409884,ENST00000409911,ENST00000  
ENST00000283943,ENST00000389044,ENST00000409677,ENST00000428959,ENST00000435716,ENST00000  
ENST00000326181  
ENST00000395385,ENST00000402377  
ENST00000342292  
ENST00000306591,ENST00000322914,ENST00000322933,ENST00000392467,ENST00000589553,ENST00000  
ENST00000199814,ENST00000447771,ENST00000540000  
ENST00000525964,ENST00000534532,ENST00000534548  
ENST00000307731,ENST00000368932

ENST00000276202,ENST00000276204  
ENST00000334063  
ENST00000344293  
ENST00000342386,ENST00000375940,ENST00000375946  
ENST00000233668,ENST00000409429  
ENST00000361727  
ENST00000205890  
ENST00000388718  
ENST00000570293,ENST00000288025  
ENST00000264895  
ENST00000278520,ENST00000423339,ENST00000542662  
ENST00000596143,ENST00000600435  
ENST00000318220,ENST00000318249,ENST00000342104,ENST00000434838,ENST00000454000  
ENST00000316073  
ENST00000369784,ENST00000487146,ENST00000602849  
ENST00000373695,ENST00000373696  
ENST00000284061,ENST00000572810  
ENST00000304992,ENST00000572621,ENST00000577001  
ENST00000371466,ENST00000371470  
ENST00000369108,ENST00000392870  
ENST00000526538  
ENST00000439326  
ENST00000262215,ENST00000520381  
ENST00000355650,ENST00000589717,ENST00000592725  
ENST00000358933  
ENST00000355650,ENST00000589717,ENST00000592725  
ENST00000368804  
ENST00000340385  
ENST00000371121,ENST00000371122,ENST00000371123  
ENST00000283243,ENST00000392771  
ENST00000334121,ENST00000380918  
ENST00000373695,ENST00000373696  
ENST00000526538  
ENST00000371121,ENST00000371122,ENST00000371123  
ENST00000304992,ENST00000572621,ENST00000577001  
ENST00000355650,ENST00000589717,ENST00000592725,ENST00000355650,ENST00000589717,ENST00000  
ENST00000371466,ENST00000371470  
ENST00000439326  
ENST00000283243,ENST00000392771  
ENST00000334121,ENST00000380918  
ENST00000262215,ENST00000520381  
ENST00000358933  
ENST00000284061,ENST00000572810  
ENST00000340385  
ENST00000369108,ENST00000392870  
ENST00000373695,ENST00000373696  
ENST00000368804

ENST00000547628,ENST00000602107  
ENST00000340781,ENST00000367134,ENST00000367135  
ENST00000358097,ENST00000433992  
ENST00000306151,ENST00000379439  
ENST00000356508,ENST00000409281,ENST00000409419,ENST00000409587,ENST00000409735  
ENST00000320078,ENST00000401740,ENST00000593983,ENST00000598133  
ENST00000320743,ENST00000379141,ENST00000433272,ENST00000552267  
ENST00000529911  
ENST00000361367  
ENST00000374024  
ENST00000371764  
ENST00000290209,ENST00000354181,ENST00000397702,ENST00000397707,ENST00000451844,ENST00000  
ENST00000290239,ENST00000300278,ENST00000356577,ENST00000381679,ENST00000455528  
ENST00000367848  
ENST00000288350,ENST00000358268,ENST00000380671  
ENST00000263816,ENST00000443831  
ENST00000263434,ENST00000376350  
ENST00000262836,ENST00000360648,ENST00000372007,ENST00000372010,ENST00000417227,ENST00000  
ENST00000262467,ENST00000269280,ENST00000345221,ENST00000354411,ENST00000544378,ENST00000  
ENST00000285968  
ENST00000268482  
ENST00000404459  
ENST00000299506,ENST00000305253,ENST00000534099  
ENST00000256999,ENST00000340334,ENST00000356696,ENST00000533034  
ENST00000320033  
ENST00000373840,ENST00000451303  
ENST00000025008,ENST00000435644,ENST00000539297  
ENST00000420699,ENST00000461153  
ENST00000435989  
ENST00000304514,ENST00000409886  
ENST00000368799  
ENST00000435359,ENST00000538975,ENST00000570628,ENST00000574426  
ENST00000302874,ENST00000507760  
ENST00000285968  
ENST00000263816,ENST00000443831  
ENST00000263816,ENST00000443831  
ENST00000358097,ENST00000433992  
ENST00000340781,ENST00000367134,ENST00000367135  
ENST00000371764  
ENST00000306151,ENST00000379439  
ENST00000529911  
ENST00000262467,ENST00000269280,ENST00000345221,ENST00000354411,ENST00000544378,ENST00000  
ENST00000256999,ENST00000340334,ENST00000356696,ENST00000533034  
ENST00000262836,ENST00000360648,ENST00000372007,ENST00000372010,ENST00000417227,ENST00000  
ENST00000320033  
ENST00000288350,ENST00000358268,ENST00000380671  
ENST00000361367

ENST00000367848  
ENST00000290239,ENST00000300278,ENST00000356577,ENST00000381679,ENST00000455528  
ENST00000435359,ENST00000538975,ENST00000570628,ENST00000574426  
ENST00000547628,ENST00000602107  
ENST00000263434,ENST00000376350  
ENST00000302874,ENST00000507760  
ENST00000290209,ENST00000354181,ENST00000397702,ENST00000397707,ENST00000451844,ENST00000  
ENST00000320078,ENST00000401740,ENST00000593983,ENST00000598133  
ENST00000435989  
ENST00000373840,ENST00000451303  
ENST00000320743,ENST00000379141,ENST00000433272,ENST00000552267  
ENST00000025008,ENST00000435644,ENST00000539297  
ENST00000356508,ENST00000409281,ENST00000409419,ENST00000409587,ENST00000409735  
ENST00000374024  
ENST00000304514,ENST00000409886  
ENST00000305253  
ENST00000404459  
ENST00000368799  
ENST00000420699,ENST00000461153  
ENST00000268482  
ENST00000348028,ENST00000349350,ENST00000421100,ENST00000427578,ENST00000443370,ENST00000  
ENST00000328354,ENST00000348295,ENST00000382578,ENST00000382580,ENST00000402731,ENST00000  
ENST00000559949  
ENST00000361789  
ENST00000219476,ENST00000350773,ENST00000353929,ENST00000382538,ENST00000401874,ENST00000  
ENST00000301067  
ENST00000278882,ENST00000358464,ENST00000439954  
ENST00000310336,ENST00000379922,ENST00000379939,ENST00000400445,ENST00000537702,ENST00000  
ENST00000361789  
ENST00000437584,ENST00000535591  
ENST00000231498,ENST00000381843,ENST00000513532  
ENST00000358970,ENST00000511306  
ENST00000382292,ENST00000382298,ENST00000402364  
ENST00000357033,ENST00000378677  
ENST00000361789  
ENST00000361789  
ENST00000348028,ENST00000349350,ENST00000421100,ENST00000427578,ENST00000443370,ENST00000  
ENST00000301067  
ENST00000382292,ENST00000382298,ENST00000402364  
ENST00000278882,ENST00000358464,ENST00000439954  
ENST00000437584,ENST00000535591  
ENST00000328354,ENST00000348295,ENST00000382578,ENST00000382580,ENST00000402731,ENST00000  
ENST00000357033,ENST00000378677  
ENST00000231498,ENST00000381843,ENST00000513532  
ENST00000310336,ENST00000379922,ENST00000379939,ENST00000400445,ENST00000537702,ENST00000  
ENST00000358970,ENST00000511306  
ENST00000219476,ENST00000350773,ENST00000353929,ENST00000382538,ENST00000401874,ENST00000

ENST00000559949  
ENST00000361624  
ENST00000361567  
ENST00000437584,ENST00000535591  
ENST00000437584,ENST00000535591  
ENST00000297826,ENST00000374469,ENST00000401783  
ENST00000334961,ENST00000338641,ENST00000353887,ENST00000361166,ENST00000361452,ENST00000:  
ENST00000441802  
ENST00000361739  
ENST00000328423,ENST00000431282,ENST00000564831  
ENST00000356641,ENST00000397843,ENST00000532993  
ENST00000283195  
ENST00000279575,ENST00000535904  
ENST00000375915  
ENST00000361739  
ENST00000361624  
ENST00000437584,ENST00000535591,ENST00000437584,ENST00000535591  
ENST00000361567  
ENST00000441802  
ENST00000356641,ENST00000397843,ENST00000532993  
ENST00000334961,ENST00000338641,ENST00000353887,ENST00000361166,ENST00000361452,ENST00000:  
ENST00000328423,ENST00000431282,ENST00000564831  
ENST00000297826,ENST00000374469,ENST00000401783  
ENST00000283195  
ENST00000375915  
ENST00000279575,ENST00000535904  
ENST00000298232,ENST00000328758,ENST00000342420,ENST00000361285  
ENST00000358970,ENST00000511306  
ENST00000304514,ENST00000409886  
ENST00000358970,ENST00000511306  
ENST00000358397,ENST00000423620,ENST00000433389,ENST00000454170  
ENST00000304514,ENST00000409886  
ENST00000313581,ENST00000431575,ENST00000520309  
ENST00000361899  
ENST00000559949  
ENST00000334344  
ENST00000434794  
ENST00000256442,ENST00000505500,ENST00000506572,ENST00000508407  
ENST00000283195  
ENST00000288368  
ENST00000251268,ENST00000334370  
ENST00000318560,ENST00000372348  
ENST00000367482,ENST00000367483,ENST00000367485,ENST00000367486,ENST00000445192  
ENST00000339872,ENST00000341423,ENST00000399494,ENST00000405805  
ENST00000256442,ENST00000505500,ENST00000506572,ENST00000508407  
ENST00000318560,ENST00000372348  
ENST00000298232,ENST00000328758,ENST00000342420,ENST00000361285

ENST00000251268,ENST00000334370  
ENST00000283195  
ENST00000313581,ENST00000431575,ENST00000520309  
ENST00000334344  
ENST00000361899  
ENST00000358970,ENST00000511306  
ENST00000304514,ENST00000409886,ENST00000304514,ENST00000409886  
ENST00000389484,ENST00000434794  
ENST00000288368  
ENST00000358397,ENST00000423620,ENST00000433389,ENST00000454170  
ENST00000358970,ENST00000511306  
ENST00000559949  
ENST00000367482,ENST00000367483,ENST00000367485,ENST00000367486,ENST00000445192  
ENST00000339872,ENST00000341423,ENST00000399494,ENST00000405805  
ENST00000304887,ENST00000413702,ENST00000456088  
ENST00000255448,ENST00000360631,ENST00000379892  
ENST00000262207,ENST00000517786,ENST00000523524  
ENST00000370742  
ENST00000284476  
ENST00000462323,ENST00000463781,ENST00000466475,ENST00000470451,ENST00000475231,ENST00000  
ENST00000357033,ENST00000378677  
ENST00000342175,ENST00000342992,ENST00000359218,ENST00000360870,ENST00000460472,ENST00000  
ENST00000263734  
ENST00000371852  
ENST00000589042  
ENST00000375888,ENST00000375897,ENST00000375901,ENST00000375905,ENST00000396271  
ENST00000297494,ENST00000461406  
ENST00000345988,ENST00000590782,ENST00000592772  
ENST00000370225,ENST00000535881,ENST00000536513  
ENST00000357816,ENST00000381853,ENST00000515384  
ENST00000358970  
ENST00000342056,ENST00000355194,ENST00000355635,ENST00000370398,ENST00000402622,ENST00000  
ENST00000278937,ENST00000438295  
ENST00000334705,ENST00000521166  
ENST00000296088,ENST00000429705,ENST00000437827,ENST00000454177  
ENST00000262539,ENST00000374541,ENST00000394827,ENST00000412145,ENST00000446349  
ENST00000193391  
ENST00000359568  
ENST00000231454  
ENST00000303383  
ENST00000357033,ENST00000378677  
ENST00000304863  
ENST00000368198,ENST00000368199,ENST00000392306  
ENST00000394420,ENST00000537866  
ENST00000370225,ENST00000535881,ENST00000536513  
ENST00000255448,ENST00000360631,ENST00000379892  
ENST00000303383

ENST00000394420,ENST00000537866  
ENST00000262539,ENST00000374541,ENST00000394827,ENST00000412145,ENST00000446349  
ENST00000193391  
ENST00000371852  
ENST00000345988,ENST00000590782,ENST00000592772  
ENST00000357033,ENST00000378677  
ENST00000334705,ENST00000521166  
ENST00000284476  
ENST00000231454  
ENST00000342175,ENST00000342992,ENST00000359218,ENST00000360870,ENST00000460472,ENST00000370742  
ENST00000342056,ENST00000355194,ENST00000355635,ENST00000370398,ENST00000402622,ENST00000357816,ENST00000381853,ENST00000515384  
ENST00000375888,ENST00000375897,ENST00000375901,ENST00000375905,ENST00000396271  
ENST00000357033,ENST00000378677  
ENST00000262207,ENST00000517786,ENST00000523524  
ENST00000304863  
ENST00000296088,ENST00000429705,ENST00000437827,ENST00000454177  
ENST00000589042  
ENST00000368198,ENST00000368199,ENST00000392306  
ENST00000297494,ENST00000461406  
ENST00000263734  
ENST00000359568  
ENST00000462323,ENST00000463781,ENST00000466475,ENST00000470451,ENST00000475231,ENST00000278937,ENST00000438295  
ENST00000358970  
ENST00000304887,ENST00000413702,ENST00000456088  
ENST00000366789  
ENST00000340160,ENST00000520358,ENST00000520837,ENST00000520999,ENST00000533080,ENST00000306151,ENST00000379439  
ENST00000262207,ENST00000517786,ENST00000523524  
ENST00000370742  
ENST00000357033,ENST00000378677  
ENST00000342175,ENST00000342992,ENST00000359218,ENST00000360870,ENST00000460472,ENST00000306177,ENST00000426246,ENST00000465073,ENST00000521713  
ENST00000263734  
ENST00000328354,ENST00000348295,ENST00000382578,ENST00000382580,ENST00000402731,ENST00000348161,ENST00000445275,ENST00000536554,ENST00000540336,ENST00000570371,ENST00000258385,ENST00000457943,ENST00000543200  
ENST00000589042  
ENST00000375806,ENST00000375809,ENST00000375810,ENST00000480039  
ENST00000262765  
ENST00000005386,ENST00000380650  
ENST00000370225,ENST00000535881,ENST00000536513  
ENST00000357816,ENST00000381853,ENST00000515384  
ENST00000297990,ENST00000353159,ENST00000379471,ENST00000455041  
ENST00000295025,ENST00000394479



ENST00000358970  
ENST00000265577,ENST00000317367,ENST00000339809,ENST00000396675,ENST00000401396,ENST00000.  
ENST00000334705,ENST00000521166  
ENST00000326441,ENST00000423103,ENST00000593695,ENST00000598410,ENST00000599534,ENST00000.  
ENST00000296088,ENST00000429705,ENST00000437827,ENST00000454177  
ENST00000262539,ENST00000374541,ENST00000394827,ENST00000412145,ENST00000446349  
ENST00000254322,ENST00000396969  
ENST00000381271  
ENST00000278360,ENST00000378878,ENST00000378880,ENST00000527605,ENST00000532848  
ENST00000294954,ENST00000344775,ENST00000405626  
ENST00000335312,ENST00000537021,ENST00000539785,ENST00000589578  
ENST00000311852,ENST00000548761  
ENST00000357033,ENST00000378677  
ENST00000397126  
ENST00000394420,ENST00000537866  
ENST00000435989  
ENST00000358519,ENST00000402813,ENST00000420489,ENST00000514170,ENST00000544810  
ENST00000324883,ENST00000324907,ENST00000405379,ENST00000472167  
ENST00000370225,ENST00000535881,ENST00000536513  
ENST00000348161,ENST00000445275,ENST00000536554,ENST00000540336,ENST00000570371,ENST00000.  
ENST00000366789  
ENST00000375809,ENST00000375810  
ENST00000394420,ENST00000537866  
ENST00000358519,ENST00000402813,ENST00000420489,ENST00000514170,ENST00000544810  
ENST00000262539,ENST00000374541,ENST00000394827,ENST00000412145,ENST00000446349  
ENST00000306177,ENST00000426246,ENST00000465073,ENST00000521713  
ENST00000328354,ENST00000348295,ENST00000382578,ENST00000382580,ENST00000402731,ENST00000.  
ENST00000357033,ENST00000378677  
ENST00000340160,ENST00000520358,ENST00000520837,ENST00000520999,ENST00000533202,ENST00000.  
ENST00000334705,ENST00000521166  
ENST00000324883,ENST00000324907,ENST00000405379,ENST00000472167  
ENST00000342175,ENST00000342992,ENST00000359218,ENST00000360870,ENST00000460472,ENST00000.  
ENST00000370742  
ENST00000258385,ENST00000457943,ENST00000543200  
ENST00000265577,ENST00000317367,ENST00000339809,ENST00000396675,ENST00000401396,ENST00000.  
ENST00000381271  
ENST00000357816,ENST00000381853,ENST00000515384  
ENST00000357033,ENST00000378677  
ENST00000262207,ENST00000517786,ENST00000523524  
ENST00000297990,ENST00000353159,ENST00000379471,ENST00000455041  
ENST00000278360,ENST00000378878,ENST00000378880,ENST00000527605,ENST00000532848  
ENST00000294954,ENST00000344775,ENST00000405626  
ENST00000296088,ENST00000429705,ENST00000437827,ENST00000454177  
ENST00000589042  
ENST00000254322,ENST00000396969  
ENST00000311852,ENST00000548761  
ENST00000262765

ENST00000435989  
ENST00000295025,ENST00000394479  
ENST00000397126  
ENST00000005386,ENST00000380650  
ENST00000263734  
ENST00000335312,ENST00000537021,ENST00000539785,ENST00000589578  
ENST00000326441,ENST00000423103,ENST00000593695,ENST00000598410,ENST00000599534,ENST00000:  
ENST00000358970  
ENST00000306151,ENST00000379439  
ENST00000359775,ENST00000414563  
ENST00000251496  
ENST00000318220,ENST00000318249,ENST00000342104,ENST00000434838,ENST00000454000  
ENST00000360861,ENST00000416216,ENST00000427436,ENST00000454876,ENST00000458124  
ENST00000306151,ENST00000379439  
ENST00000395385,ENST00000402377  
ENST00000343769,ENST00000397126  
ENST00000252799,ENST00000395094,ENST00000535210,ENST00000568028,ENST00000569360  
ENST00000238341,ENST00000373855,ENST00000373865  
ENST00000415833,ENST00000424340,ENST00000517539,ENST00000528249  
ENST00000427401,ENST00000594419  
ENST00000264245  
ENST00000262873  
ENST00000355504,ENST00000392288  
ENST00000273153,ENST00000514182  
ENST00000311234,ENST00000398119,ENST00000420668,ENST00000442263,ENST00000463928,ENST00000:  
ENST00000358855,ENST00000432670,ENST00000442668,ENST00000535387,ENST00000542053,ENST00000:  
ENST00000348028,ENST00000349350,ENST00000421100,ENST00000427578,ENST00000443370,ENST00000:  
ENST00000397126  
ENST00000316073  
ENST00000369219  
ENST00000269228,ENST00000412552  
ENST00000286349  
ENST00000312108,ENST00000360719,ENST00000395650,ENST00000405237,ENST00000434492,ENST00000:  
ENST00000291700,ENST00000367071,ENST00000397648  
ENST00000281172,ENST00000540613,ENST00000542903,ENST00000543523,ENST00000543612  
ENST00000294172,ENST00000439713,ENST00000525576,ENST00000530875,ENST00000531709,ENST00000:  
ENST00000299367,ENST00000442278,ENST00000452323,ENST00000456570,ENST00000469372,ENST00000:  
ENST00000462323,ENST00000463781,ENST00000466475,ENST00000470451,ENST00000475231,ENST00000:  
ENST00000316073  
ENST00000228682,ENST00000528467,ENST00000532291,ENST00000543426,ENST00000546141  
ENST00000316073  
ENST00000355619,ENST00000417323  
ENST00000278520,ENST00000423339,ENST00000542662  
ENST00000361883  
ENST00000240499,ENST00000395385,ENST00000402377  
ENST00000306151,ENST00000379439  
ENST00000324725,ENST00000398027,ENST00000490721

ENST00000331442  
ENST00000333891,ENST00000423517  
ENST00000333892  
ENST00000355072  
ENST00000397126  
ENST00000306151,ENST00000379439  
ENST00000260595,ENST00000312734,ENST00000402394,ENST00000404694,ENST00000405600  
ENST00000260595,ENST00000312734,ENST00000402394,ENST00000404694,ENST00000405600  
ENST00000240499  
ENST00000397126  
ENST00000355504,ENST00000392288  
ENST00000360861,ENST00000416216,ENST00000427436,ENST00000454876,ENST00000458124  
ENST00000427401,ENST00000594419  
ENST00000331442  
ENST00000251496  
ENST00000359775,ENST00000414563  
ENST00000262873  
ENST00000343769  
ENST00000311234,ENST00000398119,ENST00000420668,ENST00000442263,ENST00000463928,ENST00000.  
ENST00000264245  
ENST00000281172,ENST00000540613,ENST00000542903,ENST00000543523,ENST00000543612  
ENST00000269228,ENST00000412552  
ENST00000291700,ENST00000367071,ENST00000397648  
ENST00000299367,ENST00000442278,ENST00000452323,ENST00000469372,ENST00000497706,ENST00000.  
ENST00000273153,ENST00000514182  
ENST00000238341,ENST00000373855,ENST00000373865  
ENST00000397126  
ENST00000395385,ENST00000402377  
ENST00000306151,ENST00000379439  
ENST00000252799,ENST00000395094,ENST00000535210,ENST00000568028,ENST00000569360  
ENST00000312108,ENST00000360719,ENST00000395650,ENST00000405237,ENST00000434492,ENST00000.  
ENST00000306151,ENST00000379439  
ENST00000286349  
ENST00000278520,ENST00000423339,ENST00000542662  
ENST00000358855,ENST00000432670,ENST00000442668,ENST00000535387,ENST00000542053,ENST00000.  
ENST00000355619,ENST00000417323  
ENST00000462323,ENST00000463781,ENST00000466475,ENST00000470451,ENST00000475231,ENST00000.  
ENST00000369219  
ENST00000306151,ENST00000379439  
ENST00000355072  
ENST00000318220,ENST00000318249,ENST00000342104,ENST00000434838,ENST00000454000  
ENST00000228682,ENST00000528467,ENST00000532291,ENST00000543426,ENST00000546141  
ENST00000260595,ENST00000312734,ENST00000402394,ENST00000404694,ENST00000405600  
ENST00000294172,ENST00000439713,ENST00000525576,ENST00000530875,ENST00000531709,ENST00000.  
ENST00000324725,ENST00000398027,ENST00000490721  
ENST00000415833,ENST00000424340,ENST00000517539,ENST00000528249  
ENST00000333892

ENST00000316073  
ENST00000316073  
ENST00000361883  
ENST00000316073,ENST00000316073  
ENST00000348028,ENST00000349350,ENST00000421100,ENST00000427578,ENST00000443370,ENST00000443391,ENST00000423517  
ENST00000264771,ENST00000507319,ENST00000514453,ENST00000514546  
ENST00000241124,ENST00000356192,ENST00000400065,ENST00000400066  
ENST00000251496  
ENST00000455150  
ENST00000329564  
ENST00000219406,ENST00000404312,ENST00000435833  
ENST00000255381  
ENST00000242323,ENST00000377724  
ENST00000278882,ENST00000358464,ENST00000439954  
ENST00000328405  
ENST00000415833,ENST00000424340,ENST00000517539,ENST00000528249  
ENST00000376752,ENST00000376767,ENST00000424854,ENST00000545128  
ENST00000264245  
ENST00000349570,ENST00000358353,ENST00000397542  
ENST00000341509,ENST00000537670  
ENST00000160373  
ENST00000358855,ENST00000432670,ENST00000442668,ENST00000535387,ENST00000542053,ENST000005397126  
ENST00000295903,ENST00000498707  
ENST00000256443  
ENST00000329697,ENST00000565232,ENST00000565322,ENST00000567001  
ENST00000306829,ENST00000561311  
ENST00000011898,ENST00000407263,ENST00000537971  
ENST00000269228,ENST00000412552  
ENST00000286349  
ENST00000262519  
ENST00000263331,ENST00000409894,ENST00000417433,ENST00000537335,ENST00000541869  
ENST00000252519,ENST00000427411  
ENST00000269217,ENST00000313654,ENST00000399516,ENST00000587184  
ENST00000236957,ENST00000392221,ENST00000392222,ENST00000415904,ENST00000429769,ENST00000422146,ENST00000597252  
ENST00000221355,ENST00000434248  
ENST00000362057  
ENST00000242310  
ENST00000316073  
ENST00000462323,ENST00000463781,ENST00000466475,ENST00000470451,ENST00000475231,ENST000004356025,ENST00000358771,ENST00000400068  
ENST00000355619,ENST00000417323  
ENST00000381396,ENST00000396208,ENST00000396212  
ENST00000378024  
ENST00000261772

ENST00000355072  
ENST00000397126  
ENST00000262519  
ENST00000251496  
ENST00000264771,ENST00000507319,ENST00000508204,ENST00000509508,ENST00000510493,ENST00000  
ENST00000349570,ENST00000358353,ENST00000397542  
ENST00000376752,ENST00000376767,ENST00000424854,ENST00000545128  
ENST00000328405  
ENST00000269217,ENST00000313654,ENST00000399516,ENST00000587184  
ENST00000160373  
ENST00000329564  
ENST00000264245  
ENST00000269228,ENST00000412552  
ENST00000455150  
ENST00000278882,ENST00000358464,ENST00000439954  
ENST00000263331,ENST00000409894,ENST00000417433,ENST00000537335,ENST00000541869  
ENST00000241124,ENST00000356192,ENST00000400065,ENST00000400066  
ENST00000261772  
ENST00000341509,ENST00000537670  
ENST00000219406,ENST00000404312,ENST00000435833  
ENST00000356025,ENST00000358771,ENST00000400068  
ENST00000236957,ENST00000392221,ENST00000392222,ENST00000415904,ENST00000429769,ENST00000  
ENST00000011898,ENST00000407263,ENST00000537971  
ENST00000306829,ENST00000561311  
ENST00000242310  
ENST00000221355,ENST00000434248  
ENST00000286349  
ENST00000322146,ENST00000597252  
ENST00000358855,ENST00000432670,ENST00000442668,ENST00000535387,ENST00000542053,ENST00000  
ENST00000255381  
ENST00000355619,ENST00000417323  
ENST00000242323,ENST00000377724  
ENST00000256443,ENST00000514676  
ENST00000378024  
ENST00000295903,ENST00000498707  
ENST00000329697,ENST00000565232,ENST00000565322,ENST00000567001  
ENST00000355072  
ENST00000381396,ENST00000396208,ENST00000396212  
ENST00000252519,ENST00000427411  
ENST00000462323,ENST00000463781,ENST00000466475,ENST00000470451,ENST00000475231,ENST00000  
ENST00000362057  
ENST00000415833,ENST00000424340,ENST00000517539,ENST00000528249  
ENST00000316073  
ENST00000357409,ENST00000360280,ENST00000376634,ENST00000376636  
ENST00000382205,ENST00000526438  
ENST00000437584,ENST00000535591  
ENST00000355957,ENST00000358029,ENST00000361770,ENST00000361830,ENST00000371132,ENST00000

ENST00000388820  
ENST00000366553  
ENST00000369870  
ENST00000538744  
ENST00000425945  
ENST00000337331  
ENST00000437584,ENST00000535591  
ENST00000355973,ENST00000376977,ENST00000377012,ENST00000377016,ENST00000377034,ENST00000314612  
ENST00000321424,ENST00000340550,ENST00000430817  
ENST00000298047,ENST00000409404,ENST00000525166  
ENST00000261203,ENST00000549417,ENST00000552864  
ENST00000240189  
ENST00000400299,ENST00000402395  
ENST00000338820,ENST00000394903,ENST00000444643  
ENST00000343518  
ENST00000357214  
ENST00000609686  
ENST00000305031  
ENST00000342868  
ENST00000359376  
ENST00000188403,ENST00000321046,ENST00000392986,ENST00000548884,ENST00000549996,ENST00000342960  
ENST00000259206,ENST00000354115,ENST00000409930  
ENST00000361381  
ENST00000275884,ENST00000496613,ENST00000537639  
ENST00000229447,ENST00000344419,ENST00000367335,ENST00000392255,ENST00000392256,ENST00000489525  
ENST00000376296  
ENST00000310441,ENST00000354233,ENST00000369984  
ENST00000382622  
ENST00000343414  
ENST00000373344,ENST00000395603  
ENST00000400299,ENST00000402395  
ENST00000489525  
ENST00000376296  
ENST00000369870  
ENST00000358029  
ENST00000538744  
ENST00000310441,ENST00000354233,ENST00000369984  
ENST00000355973,ENST00000376977,ENST00000377012,ENST00000377016,ENST00000377034,ENST00000355973,ENST00000376977,ENST00000377012,ENST00000377016,ENST00000377034,ENST00000357214  
ENST00000382205,ENST00000526438  
ENST00000305031  
ENST00000240189  
ENST00000314612

ENST00000437584,ENST00000535591  
ENST00000343414  
ENST00000388820  
ENST00000437584,ENST00000535591  
ENST00000298047,ENST00000409404,ENST00000525166  
ENST00000275884,ENST00000496613,ENST00000537639  
ENST00000259206,ENST00000354115,ENST00000409930  
ENST00000425945  
ENST00000452611  
ENST00000361381  
ENST00000366553  
ENST00000229447,ENST00000344419,ENST00000367335,ENST00000392255,ENST00000392256,ENST00000373344,ENST00000395603  
ENST00000261203,ENST00000549417,ENST00000552864  
ENST00000357409,ENST00000360280,ENST00000376634,ENST00000376636  
ENST00000609686  
ENST00000188403,ENST00000321046,ENST00000392986,ENST00000548884,ENST00000549996,ENST00000338820,ENST00000394903,ENST00000444643  
ENST00000342868  
ENST00000359376  
ENST00000321424,ENST00000340550,ENST00000430817  
ENST00000342960  
ENST00000337331  
ENST00000343518  
ENST00000357409,ENST00000360280,ENST00000376634,ENST00000376636  
ENST00000361789  
ENST00000373509  
ENST00000260323,ENST00000537900,ENST00000545554  
ENST00000361739  
ENST00000366553  
ENST00000265351  
ENST00000336233,ENST00000371837,ENST00000456827  
ENST00000369870  
ENST00000368144  
ENST00000337331  
ENST00000267377  
ENST00000262215,ENST00000518230,ENST00000520381  
ENST00000298047,ENST00000409404,ENST00000525166  
ENST00000243776,ENST00000535926  
ENST00000282282  
ENST00000315563,ENST00000370992,ENST00000414986,ENST00000536831  
ENST00000338820,ENST00000394903,ENST00000444643  
ENST00000336431  
ENST00000303254  
ENST00000295902,ENST00000564377  
ENST00000609686  
ENST00000456556

ENST00000305031  
ENST00000342868  
ENST00000359376  
ENST00000259206,ENST00000354115,ENST00000409930  
ENST00000262968,ENST00000382008,ENST00000539908,ENST00000541714,ENST00000587686,ENST00000  
ENST00000216487  
ENST00000361381  
ENST00000275884,ENST00000496613,ENST00000537639  
ENST00000375001  
ENST00000346322,ENST00000359169,ENST00000360304,ENST00000360772,ENST00000475616  
ENST00000336431  
ENST00000369870  
ENST00000361789  
ENST00000315563,ENST00000370992,ENST00000414986,ENST00000536831  
ENST00000361739  
ENST00000305031  
ENST00000262968,ENST00000382008,ENST00000539908,ENST00000541714,ENST00000587686,ENST00000  
ENST00000265351  
ENST00000260323,ENST00000537900,ENST00000545554  
ENST00000267377  
ENST00000336233,ENST00000371837,ENST00000456827  
ENST00000298047,ENST00000409404,ENST00000525166  
ENST00000275884,ENST00000496613,ENST00000537639  
ENST00000282282  
ENST00000259206,ENST00000354115,ENST00000409930  
ENST00000361381  
ENST00000295902,ENST00000564377  
ENST00000375001  
ENST00000366553  
ENST00000373509  
ENST00000373509  
ENST00000303254  
ENST00000357409,ENST00000360280,ENST00000376634,ENST00000376636  
ENST00000346322,ENST00000359169,ENST00000360304,ENST00000360772,ENST00000475616  
ENST00000609686  
ENST00000338820,ENST00000394903,ENST00000444643  
ENST00000342868  
ENST00000368144  
ENST00000359376  
ENST00000216487  
ENST00000262215,ENST00000518230,ENST00000520381  
ENST00000456556  
ENST00000337331  
ENST00000243776,ENST00000535926  
ENST00000304166,ENST00000396211,ENST00000409363,ENST00000409489  
ENST00000350608,ENST00000398344,ENST00000404092  
ENST00000381334,ENST00000506198,ENST00000508404



ENST00000360151  
ENST00000371222  
ENST00000293725  
ENST00000369219  
ENST00000340273  
ENST00000300619,ENST00000397082  
ENST00000350608,ENST00000398344,ENST00000404092  
ENST00000333796  
ENST00000318220,ENST00000318249,ENST00000342104,ENST00000434838,ENST00000454000  
ENST00000368836  
ENST00000379708,ENST00000416505,ENST00000520655,ENST00000520810,ENST00000520835,ENST00000:  
ENST00000262269,ENST00000376970,ENST00000425460,ENST00000440075,ENST00000596571,ENST00000:  
ENST00000296318,ENST00000320057,ENST00000427856,ENST00000463523  
ENST00000547628,ENST00000602107  
ENST00000233242,ENST00000399256  
ENST00000399147  
ENST00000375494  
ENST00000601440  
ENST00000245543  
ENST00000562295  
ENST00000430580  
ENST00000288447,ENST00000357033,ENST00000378677  
ENST00000400454,ENST00000404019  
ENST00000356929  
ENST00000536684,ENST00000540040,ENST00000604882  
ENST00000399147  
ENST00000292309,ENST00000450053  
ENST00000391675,ENST00000465342  
ENST00000267219,ENST00000351546,ENST00000358679,ENST00000418532,ENST00000441784,ENST00000:  
ENST00000342960  
ENST00000380250  
ENST00000311048  
ENST00000343776,ENST00000397097,ENST00000418100  
ENST00000211998,ENST00000372755,ENST00000436396  
ENST00000338977,ENST00000511833  
ENST00000357491,ENST00000601693  
ENST00000444627  
ENST00000317658  
ENST00000594710  
ENST00000240499,ENST00000300619,ENST00000343776,ENST00000357491,ENST00000397082,ENST00000:  
ENST00000306100,ENST00000379164,ENST00000427802,ENST00000536695  
ENST00000358491  
ENST00000594710  
ENST00000187397,ENST00000337271,ENST00000417925,ENST00000444190,ENST00000457165,ENST00000:  
ENST00000342944,ENST00000357002  
ENST00000248244  
ENST00000300619,ENST00000311048,ENST00000397082

ENST00000528956  
ENST00000261263  
ENST00000397126,ENST00000594947  
ENST00000311048  
ENST00000397126  
ENST00000418100  
ENST00000431200  
ENST00000594947  
ENST00000357491,ENST00000358491,ENST00000418063,ENST00000601693  
ENST00000397126  
ENST00000418063  
ENST00000444627  
ENST00000245543  
ENST00000350608,ENST00000398344,ENST00000404092,ENST00000350608,ENST00000398344,ENST00000380250  
ENST00000296318,ENST00000320057,ENST00000427856,ENST00000463523  
ENST00000399147,ENST00000399147  
ENST00000357491,ENST00000601693  
ENST00000381334,ENST00000506198,ENST00000508404  
ENST00000317658  
ENST00000338977,ENST00000511833  
ENST00000233242,ENST00000399256  
ENST00000601440  
ENST00000357491,ENST00000601693  
ENST00000528956  
ENST00000342944,ENST00000357002  
ENST00000368836  
ENST00000292309,ENST00000450053  
ENST00000536684,ENST00000540040,ENST00000604882  
ENST00000293725  
ENST00000306100,ENST00000379164,ENST00000427802,ENST00000536695  
ENST00000356929  
ENST00000340273  
ENST00000418063  
ENST00000187397,ENST00000337271,ENST00000417925,ENST00000444190,ENST00000457165,ENST00000300619,ENST00000397082  
ENST00000379708,ENST00000416505,ENST00000520655,ENST00000520810,ENST00000520835,ENST00000369219  
ENST00000562295  
ENST00000397126  
ENST00000358491  
ENST00000248244  
ENST00000360151  
ENST00000375494  
ENST00000399147  
ENST00000333796  
ENST00000311048,ENST00000311048

ENST00000371222  
ENST00000262269,ENST00000376970,ENST00000425460,ENST00000440075,ENST00000596571,ENST00000:  
ENST00000343776,ENST00000397097  
ENST00000288447,ENST00000357033,ENST00000378677  
ENST00000604882  
ENST00000397126  
ENST00000547628,ENST00000602107  
ENST00000304166,ENST00000396211,ENST00000409363,ENST00000409489  
ENST00000211998,ENST00000372755,ENST00000436396  
ENST00000391675,ENST00000465342  
ENST00000594947  
ENST00000300619,ENST00000397082  
ENST00000594710,ENST00000594710  
ENST00000400454,ENST00000404019  
ENST00000594710  
ENST00000430580  
ENST00000418100  
ENST00000240499  
ENST00000540040  
ENST00000267219,ENST00000351546,ENST00000358679,ENST00000418532,ENST00000441784,ENST00000:  
ENST00000342960  
ENST00000431200  
ENST00000318220,ENST00000318249,ENST00000342104,ENST00000434838,ENST00000454000  
ENST00000261263  
ENST00000397126  
ENST00000397126  
ENST00000441802  
ENST00000304166,ENST00000396211,ENST00000409363,ENST00000409489  
ENST00000381334,ENST00000506198,ENST00000508404  
ENST00000371222  
ENST00000318220,ENST00000318249,ENST00000342104,ENST00000434838,ENST00000454000  
ENST00000379708,ENST00000416505,ENST00000520655,ENST00000520810,ENST00000520835,ENST00000:  
ENST00000360937,ENST00000416793,ENST00000460213,ENST00000467291,ENST00000483043,ENST00000:  
ENST00000296318,ENST00000320057,ENST00000427856,ENST00000463523  
ENST00000233242,ENST00000399256  
ENST00000305432,ENST00000305447,ENST00000393294,ENST00000393297,ENST00000418177,ENST00000:  
ENST00000439326  
ENST00000245543  
ENST00000318220,ENST00000318249,ENST00000342104,ENST00000434838,ENST00000454000  
ENST00000313382,ENST00000369347,ENST00000369348,ENST00000369349,ENST00000369351,ENST00000:  
ENST00000430580  
ENST00000400454,ENST00000404019  
ENST00000391675,ENST00000465342  
ENST00000336443,ENST00000354280,ENST00000504988,ENST00000555685  
ENST00000267219,ENST00000351546,ENST00000358679,ENST00000418532,ENST00000441784,ENST00000:  
ENST00000262189,ENST00000355193  
ENST00000380250

ENST00000418100  
ENST00000211998,ENST00000372755,ENST00000436396  
ENST00000397126  
ENST00000343769,ENST00000357491,ENST00000418063,ENST00000418100,ENST00000427401,ENST00000:  
ENST00000359626  
ENST00000304004  
ENST00000427401,ENST00000594419  
ENST00000187397,ENST00000337271,ENST00000417925,ENST00000444190,ENST00000457165,ENST00000:  
ENST00000560223  
ENST00000248244  
ENST00000528956  
ENST00000418063  
ENST00000357491,ENST00000601693  
ENST00000311635,ENST00000565593  
ENST00000291182  
ENST00000245543  
ENST00000397126  
ENST00000305432,ENST00000305447,ENST00000393294,ENST00000393297,ENST00000418177,ENST00000:  
ENST00000357491,ENST00000601693  
ENST00000380250  
ENST00000296318,ENST00000320057,ENST00000427856,ENST00000463523  
ENST00000439326  
ENST00000311635,ENST00000565593  
ENST00000381334,ENST00000506198,ENST00000508404  
ENST00000233242,ENST00000399256  
ENST00000313382,ENST00000369347,ENST00000369348,ENST00000369349,ENST00000369351,ENST00000:  
ENST00000397126  
ENST00000528956  
ENST00000262189,ENST00000355193  
ENST00000560223  
ENST00000187397,ENST00000337271,ENST00000417925,ENST00000444190,ENST00000457165,ENST00000:  
ENST00000304004  
ENST00000379708,ENST00000416505,ENST00000520655,ENST00000520810,ENST00000520835,ENST00000:  
ENST00000248244  
ENST00000360937,ENST00000416793,ENST00000460213,ENST00000467291,ENST00000483043,ENST00000:  
ENST00000291182  
ENST00000441802  
ENST00000371222  
ENST00000418100  
ENST00000304166,ENST00000396211,ENST00000409363,ENST00000409489  
ENST00000359626  
ENST00000211998,ENST00000372755,ENST00000436396  
ENST00000391675,ENST00000465342  
ENST00000418063  
ENST00000400454,ENST00000404019  
ENST00000343769  
ENST00000430580

ENST00000427401,ENST00000594419  
ENST00000318220,ENST00000318249,ENST00000342104,ENST00000434838,ENST00000454000  
ENST00000267219,ENST00000351546,ENST00000358679,ENST00000418532,ENST00000441784,ENST00000  
ENST00000336443,ENST00000354280,ENST00000555685,ENST00000504988  
ENST00000318220,ENST00000318249,ENST00000342104,ENST00000434838,ENST00000454000  
ENST00000301831,ENST00000420927  
ENST00000260682  
ENST00000335094  
ENST00000304166,ENST00000396211,ENST00000409363,ENST00000409489  
ENST00000320481,ENST00000376410,ENST00000396432,ENST00000446003  
ENST00000247930  
ENST00000296424,ENST00000508136  
ENST00000344579,ENST00000378344  
ENST00000321797,ENST00000341547,ENST00000357063,ENST00000377499,ENST00000377534,ENST00000  
ENST00000299272,ENST00000551346  
ENST00000301831,ENST00000420927  
ENST00000250559,ENST00000341355,ENST00000378985,ENST00000393436,ENST00000450214,ENST00000  
ENST00000342175,ENST00000342992,ENST00000359218,ENST00000460472,ENST00000589042,ENST00000  
ENST00000296318,ENST00000320057,ENST00000427856,ENST00000463523  
ENST00000233242,ENST00000399256  
ENST00000265403  
ENST00000329143,ENST00000430323,ENST00000533655  
ENST00000245441,ENST00000324330,ENST00000382041,ENST00000382043,ENST00000389868,ENST00000  
ENST00000360509,ENST00000396328,ENST00000557913,ENST00000559418  
ENST00000417025  
ENST00000343098,ENST00000424728  
ENST00000368507,ENST00000368508  
ENST00000319921,ENST00000456466,ENST00000508628,ENST00000582970  
ENST00000343776,ENST00000397097  
ENST00000341048,ENST00000504958,ENST00000513241  
ENST00000341415  
ENST00000391675,ENST00000465342  
ENST00000296701,ENST00000340253,ENST00000394370,ENST00000513826  
ENST00000299886  
ENST00000333837,ENST00000395487,ENST00000429094,ENST00000437801,ENST00000452445,ENST00000  
ENST00000299886  
ENST00000328843,ENST00000409508,ENST00000605912  
ENST00000526538  
ENST00000299886  
ENST00000187397,ENST00000337271,ENST00000417925,ENST00000444190,ENST00000457165,ENST00000  
ENST00000330838,ENST00000358602,ENST00000509867  
ENST00000528956  
ENST00000367870,ENST00000367872,ENST00000447624  
ENST00000361927,ENST00000546159  
ENST00000375915  
ENST00000301831,ENST00000420927,ENST00000301831,ENST00000420927  
ENST00000361927,ENST00000546159

ENST00000260682  
ENST00000319921,ENST00000456466,ENST00000508628,ENST00000582970  
ENST00000247930  
ENST00000329143,ENST00000430323,ENST00000533655  
ENST00000296701,ENST00000340253,ENST00000394370,ENST00000513826  
ENST00000299886  
ENST00000296318,ENST00000320057,ENST00000427856,ENST00000463523  
ENST00000344579,ENST00000378344  
ENST00000368507,ENST00000368508  
ENST00000343098,ENST00000424728  
ENST00000233242,ENST00000399256  
ENST00000296424,ENST00000508136  
ENST00000335094  
ENST00000341048,ENST00000504958,ENST00000513241  
ENST00000321797,ENST00000341547,ENST00000357063,ENST00000377499,ENST00000377534,ENST00000  
ENST00000528956  
ENST00000299886  
ENST00000320481,ENST00000376410,ENST00000396432,ENST00000446003  
ENST00000328843,ENST00000409508,ENST00000605912  
ENST00000330838,ENST00000358602,ENST00000509867  
ENST00000187397,ENST00000337271,ENST00000417925,ENST00000444190,ENST00000457165,ENST00000  
ENST00000360509,ENST00000396328,ENST00000557913,ENST00000559418  
ENST00000250559,ENST00000341355,ENST00000378985,ENST00000393436,ENST00000450214,ENST00000  
ENST00000299886  
ENST00000342175,ENST00000342992,ENST00000359218,ENST00000460472,ENST00000589042,ENST00000  
ENST00000265403  
ENST00000341415  
ENST00000417025  
ENST00000526538  
ENST00000343776,ENST00000397097  
ENST00000245441,ENST00000324330,ENST00000382041,ENST00000382043,ENST00000389868,ENST00000  
ENST00000367870,ENST00000367872,ENST00000447624  
ENST00000333837,ENST00000395487,ENST00000429094,ENST00000437801,ENST00000452445,ENST00000  
ENST00000304166,ENST00000396211,ENST00000409363,ENST00000409489  
ENST00000299272,ENST00000551346  
ENST00000391675,ENST00000465342  
ENST00000375915  
ENST00000304166,ENST00000396211,ENST00000409363,ENST00000409489  
ENST00000381334,ENST00000506198,ENST00000508404  
ENST00000371222  
ENST00000391720,ENST00000524407,ENST00000526003,ENST00000527223,ENST00000528412,ENST00000  
ENST00000260983,ENST00000409111  
ENST00000398276,ENST00000416314,ENST00000444627,ENST00000450689  
ENST00000379708,ENST00000416505,ENST00000520655,ENST00000520810,ENST00000520835,ENST00000  
ENST00000296318,ENST00000320057,ENST00000427856,ENST00000463523  
ENST00000233242,ENST00000399256  
ENST00000294671

ENST00000245543  
ENST00000394576  
ENST00000400454,ENST00000404019  
ENST00000391675,ENST00000465342  
ENST00000267219,ENST00000351546,ENST00000358679,ENST00000418532,ENST00000441784,ENST00000  
ENST00000399604,ENST00000575779  
ENST00000380250  
ENST00000211998,ENST00000372755,ENST00000436396  
ENST00000404801,ENST00000605484  
ENST00000338585,ENST00000370576,ENST00000370578,ENST00000414978,ENST00000446225,ENST00000  
ENST00000264245  
ENST00000358954,ENST00000393376,ENST00000417368,ENST00000431170  
ENST00000361713,ENST00000374660,ENST00000602533  
ENST00000187397,ENST00000337271,ENST00000417925,ENST00000444190,ENST00000457165,ENST00000  
ENST00000248244  
ENST00000276297,ENST00000358919,ENST00000512044,ENST00000520226  
ENST00000316356,ENST00000389960,ENST00000524452,ENST00000527523,ENST00000528231  
ENST00000528956  
ENST00000293761,ENST00000545513,ENST00000570836,ENST00000574640  
ENST00000601382  
ENST00000245543  
ENST00000398276,ENST00000416314,ENST00000425689,ENST00000444627,ENST00000450689  
ENST00000260983,ENST00000409111  
ENST00000358954,ENST00000393376,ENST00000417368,ENST00000431170  
ENST00000380250  
ENST00000296318,ENST00000320057,ENST00000427856,ENST00000463523  
ENST00000381334,ENST00000506198,ENST00000508404  
ENST00000233242,ENST00000399256  
ENST00000404801,ENST00000605484  
ENST00000294671  
ENST00000528956  
ENST00000391720,ENST00000524407,ENST00000526003,ENST00000527223,ENST00000528412,ENST00000  
ENST00000601382  
ENST00000399604,ENST00000575779  
ENST00000187397,ENST00000337271,ENST00000417925,ENST00000444190,ENST00000457165,ENST00000  
ENST00000264245  
ENST00000379708,ENST00000416505,ENST00000520655,ENST00000520810,ENST00000520835,ENST00000  
ENST00000248244  
ENST00000371222  
ENST00000304166,ENST00000396211,ENST00000409363,ENST00000409489  
ENST00000316356,ENST00000389960,ENST00000524452,ENST00000527523,ENST00000528231  
ENST00000211998,ENST00000372755,ENST00000436396  
ENST00000394576  
ENST00000391675,ENST00000465342  
ENST00000338585,ENST00000370576,ENST00000370578,ENST00000414978,ENST00000446225,ENST00000  
ENST00000400454,ENST00000404019  
ENST00000276297,ENST00000358919,ENST00000512044,ENST00000520226

ENST00000293761,ENST00000545513,ENST00000570836,ENST00000574640  
ENST00000267219,ENST00000351546,ENST00000358679,ENST00000418532,ENST00000441784,ENST00000.  
ENST00000361713,ENST00000374660,ENST00000602533  
ENST00000373361,ENST00000373367,ENST00000541184  
ENST00000319651,ENST00000334962,ENST00000339474,ENST00000400877,ENST00000584306  
ENST00000355650,ENST00000589717  
ENST00000360151  
ENST00000366261  
ENST00000397104,ENST00000596209  
ENST00000409627  
ENST00000338977,ENST00000343769,ENST00000343776,ENST00000343776,ENST00000354959,ENST00000.  
ENST00000316300,ENST00000447678  
ENST00000336917,ENST00000409343,ENST00000409692,ENST00000410066  
ENST00000005082,ENST00000343338,ENST00000354599,ENST00000354959,ENST00000397126,ENST00000.  
ENST00000420699,ENST00000461153  
ENST00000307355,ENST00000311048,ENST00000344519,ENST00000355650,ENST00000357491,ENST00000.  
ENST00000594947  
ENST00000328085  
ENST00000357491,ENST00000601693  
ENST00000424293  
ENST00000280083,ENST00000341502,ENST00000341749,ENST00000348007,ENST00000396158,ENST00000.  
ENST00000551456  
ENST00000066544,ENST00000446365,ENST00000526866,ENST00000527547,ENST00000531206  
ENST00000282391,ENST00000380958,ENST00000399613  
ENST00000279575,ENST00000445719,ENST00000535904  
ENST00000356929,ENST00000357491,ENST00000397126,ENST00000594710,ENST00000601693  
ENST00000537253  
ENST00000418100  
ENST00000419098,ENST00000594710  
ENST00000420699,ENST00000461153  
ENST00000343769  
ENST00000358047  
ENST00000355849,ENST00000524199  
ENST00000359973,ENST00000389534,ENST00000426391,ENST00000594295  
ENST00000326972,ENST00000424053,ENST00000429201  
ENST00000594947  
ENST00000362068  
ENST00000286744,ENST00000567476  
ENST00000594363,ENST00000594947,ENST00000600162  
ENST00000462323,ENST00000463781,ENST00000466475,ENST00000470451,ENST00000475231,ENST00000.  
ENST00000335117  
ENST00000395385,ENST00000402377  
ENST00000377868,ENST00000377873,ENST00000536626,ENST00000544874  
ENST00000388718  
ENST00000547458  
ENST00000594710  
ENST00000344930,ENST00000395391,ENST00000423627



ENST00000356245,ENST00000394123,ENST00000507878,ENST00000520006,ENST00000520177,ENST00000:  
ENST00000362068  
ENST00000418063  
ENST00000447333  
ENST00000280083,ENST00000341502,ENST00000341749,ENST00000348007,ENST00000396158,ENST00000:  
ENST00000359265  
ENST00000358353,ENST00000397542  
ENST00000360151  
ENST00000297405,ENST00000339701,ENST00000343508,ENST00000352409,ENST00000455883  
ENST00000311048,ENST00000355650,ENST00000456783,ENST00000589717  
ENST00000318220,ENST00000318249,ENST00000434838,ENST00000454000  
ENST00000295206  
ENST00000357491  
ENST00000458035,ENST00000595091  
ENST00000316902,ENST00000422941,ENST00000453702,ENST00000529705  
ENST00000427401  
ENST00000343776,ENST00000397097  
ENST00000390601  
ENST00000343769  
ENST00000601440  
ENST00000357491,ENST00000601693  
ENST00000429990  
ENST00000341056  
ENST00000558241  
ENST00000550760  
ENST00000456783  
ENST00000333796  
ENST00000240499  
ENST00000368801  
ENST00000355095,ENST00000423484  
ENST00000328178,ENST00000345030,ENST00000550760,ENST00000596534,ENST00000601023  
ENST00000343776,ENST00000397097,ENST00000440339,ENST00000594710  
ENST00000325437,ENST00000355803,ENST00000397514,ENST00000397515,ENST00000403747,ENST00000:  
ENST00000343776,ENST00000397097  
ENST00000256544,ENST00000561270  
ENST00000344519  
ENST00000419098  
ENST00000397126  
ENST00000300619,ENST00000354959,ENST00000354959,ENST00000354959,ENST00000357491,ENST00000:  
ENST00000343776,ENST00000397097  
ENST00000357491,ENST00000601693  
ENST00000357491,ENST00000397104,ENST00000596209,ENST00000601693  
ENST00000251203,ENST00000557978,ENST00000558222  
ENST00000357491,ENST00000601693  
ENST00000355650,ENST00000589717,ENST00000592725  
ENST00000354959,ENST00000594012,ENST00000595461,ENST00000598381  
ENST00000354959,ENST00000594012,ENST00000595461,ENST00000598381

ENST00000354959,ENST00000395385,ENST00000402377,ENST00000594012,ENST00000595461,ENST00000:  
ENST00000397126,ENST00000594710  
ENST00000280083,ENST00000341502,ENST00000341749,ENST00000348007,ENST00000396158,ENST00000:  
ENST00000427401  
ENST00000373361,ENST00000373367,ENST00000541184  
ENST00000458035,ENST00000595091  
ENST00000537253  
ENST00000547458  
ENST00000319651,ENST00000334962,ENST00000339474,ENST00000400877,ENST00000584306  
ENST00000551456  
ENST00000409627  
ENST00000336917,ENST00000409343,ENST00000409692,ENST00000410066  
ENST00000550760  
ENST00000395385,ENST00000402377  
ENST00000341056  
ENST00000343769  
ENST00000390601  
ENST00000282391,ENST00000380958,ENST00000399613  
ENST00000316902,ENST00000422941,ENST00000453702,ENST00000529705  
ENST00000362068  
ENST00000359265  
ENST00000357491,ENST00000601693  
ENST00000377868,ENST00000377873,ENST00000536626,ENST00000544874  
ENST00000359973,ENST00000389534,ENST00000426391,ENST00000594295  
ENST00000447333  
ENST00000344930,ENST00000395391,ENST00000423627  
ENST00000343776,ENST00000397097  
ENST00000297405,ENST00000339701,ENST00000343508,ENST00000352409,ENST00000455883  
ENST00000462323,ENST00000463781,ENST00000466475,ENST00000470451,ENST00000475231,ENST00000:  
ENST00000307355,ENST00000359735,ENST00000397136,ENST00000437743,ENST00000440155  
ENST00000335117  
ENST00000251203,ENST00000557978,ENST00000558222  
ENST00000066544,ENST00000446365,ENST00000526866,ENST00000527547,ENST00000531206  
ENST00000419098  
ENST00000357491  
ENST00000594710  
ENST00000397126  
ENST00000357491,ENST00000601693  
ENST00000256544,ENST00000561270  
ENST00000356929  
ENST00000328178,ENST00000345030,ENST00000596534,ENST00000601023  
ENST00000418063  
ENST00000357491,ENST00000601693  
ENST00000357491,ENST00000601693  
ENST00000318220,ENST00000318249,ENST00000434838,ENST00000454000  
ENST00000397104,ENST00000596209  
ENST00000005082,ENST00000343338,ENST00000354599,ENST00000399602,ENST00000429541,ENST00000:

ENST00000356245,ENST00000394123,ENST00000507878,ENST00000520006,ENST00000520177,ENST00000  
ENST00000354959,ENST00000594012,ENST00000595461,ENST00000598381  
ENST00000354959,ENST00000594012,ENST00000595461,ENST00000598381  
ENST00000388718  
ENST00000343776,ENST00000397097,ENST00000440339  
ENST00000418100  
ENST00000594947,ENST00000594947  
ENST00000328085,ENST00000360151  
ENST00000316300,ENST00000447678  
ENST00000397126  
ENST00000343769  
ENST00000311048  
ENST00000456783  
ENST00000300619,ENST00000397082  
ENST00000338977,ENST00000511833  
ENST00000420699,ENST00000461153,ENST00000420699,ENST00000461153  
ENST00000594947  
ENST00000355650,ENST00000589717  
ENST00000240499  
ENST00000325437,ENST00000355803,ENST00000397514,ENST00000397515,ENST00000403747,ENST00000  
ENST00000333796  
ENST00000368801  
ENST00000360151,ENST00000360151  
ENST00000419098  
ENST00000429990  
ENST00000344519  
ENST00000424293  
ENST00000594710  
ENST00000601440  
ENST00000354959,ENST00000594012,ENST00000595461,ENST00000598381  
ENST00000343776,ENST00000397097  
ENST00000355095,ENST00000423484  
ENST00000357491,ENST00000601693  
ENST00000355650,ENST00000589717  
ENST00000355849,ENST00000524199  
ENST00000366261  
ENST00000295206  
ENST00000286744,ENST00000567476  
ENST00000358047  
ENST00000358353,ENST00000397542  
ENST00000362068  
ENST00000343776,ENST00000397097  
ENST00000326972,ENST00000424053,ENST00000429201  
ENST00000558241  
ENST00000279575,ENST00000445719,ENST00000535904  
ENST00000373361,ENST00000373367,ENST00000541184  
ENST00000287534,ENST00000370652,ENST00000394141,ENST00000394143,ENST00000412101

ENST0000066544,ENST00000446365,ENST00000526866,ENST00000527547,ENST00000531206,ENST00000:  
ENST00000360540,ENST00000522514,ENST00000544451  
ENST00000304992,ENST00000572621  
ENST00000495679  
ENST00000551456  
ENST00000192788,ENST00000452449  
ENST00000301831,ENST00000420927  
ENST00000362068  
ENST00000264162  
ENST00000265071,ENST00000514738  
ENST00000332645,ENST00000398868,ENST00000538786,ENST00000540699  
ENST00000362068  
ENST00000542267  
ENST00000289953,ENST00000357199  
ENST00000317881  
ENST00000297405,ENST00000339701,ENST00000343508,ENST00000352409,ENST00000455883  
ENST00000264852,ENST00000393830  
ENST00000301831,ENST00000420927  
ENST00000360540,ENST00000522514,ENST00000544451  
ENST00000373361,ENST00000373367,ENST00000541184  
ENST00000317881  
ENST00000264852,ENST00000393830  
ENST00000533415  
ENST00000551456  
ENST00000332645,ENST00000398868,ENST00000538786,ENST00000540699  
ENST00000495679  
ENST00000362068  
ENST00000265071,ENST00000514738  
ENST00000304992,ENST00000572621  
ENST00000542267  
ENST00000192788,ENST00000452449  
ENST00000264162  
ENST00000287534,ENST00000370652,ENST00000394141,ENST00000394143,ENST00000412101  
ENST00000297405,ENST00000339701,ENST00000343508,ENST00000352409,ENST00000455883  
ENST00000289953,ENST00000357199  
ENST00000362068  
ENST00000373361,ENST00000373367,ENST00000541184  
ENST00000287534,ENST00000370652,ENST00000394141,ENST00000394143,ENST00000412101  
ENST00000300870  
ENST00000331162,ENST00000342944,ENST00000354959,ENST00000357002,ENST00000420713,ENST00000:  
ENST00000595405,ENST00000601440  
ENST00000539932  
ENST00000434783  
ENST00000261560,ENST00000344519,ENST00000397104,ENST00000596143,ENST00000596209,ENST00000:  
ENST00000342960  
ENST00000301831,ENST00000420927  
ENST00000495679

ENST00000551456  
ENST00000597976  
ENST0000066544,ENST00000446365,ENST00000526866,ENST00000527547,ENST00000531206  
ENST00000357491,ENST00000594710,ENST00000601693  
ENST00000596143,ENST00000600435  
ENST00000419098  
ENST00000301831,ENST00000420927  
ENST00000355849,ENST00000524199  
ENST00000397104,ENST00000596209  
ENST00000362068  
ENST00000264162  
ENST00000332645,ENST00000398868,ENST00000538786,ENST00000540699  
ENST00000250974,ENST00000292577,ENST00000590661,ENST00000591351  
ENST00000344519,ENST00000397104,ENST00000596143,ENST00000596209,ENST00000600435  
ENST00000261560  
ENST00000542267  
ENST00000548032  
ENST00000289953,ENST00000357199  
ENST00000596143,ENST00000600435  
ENST00000342944,ENST00000357002  
ENST00000297405,ENST00000339701,ENST00000343508,ENST00000352409,ENST00000455883  
ENST00000420713  
ENST00000274609  
ENST00000395385,ENST00000402377  
ENST00000594710  
ENST00000300619,ENST00000339986,ENST00000354959,ENST00000397082,ENST00000418100,ENST00000418100  
ENST00000418100  
ENST00000339986  
ENST00000420713  
ENST00000354959,ENST00000594012,ENST00000595461,ENST00000598381  
ENST00000301831,ENST00000420927,ENST00000301831,ENST00000420927  
ENST00000373361,ENST00000373367,ENST00000541184  
ENST00000597976  
ENST00000551456  
ENST00000332645,ENST00000398868,ENST00000538786,ENST00000540699  
ENST00000495679  
ENST00000434783  
ENST00000362068  
ENST00000342960  
ENST00000542267  
ENST00000539932  
ENST00000344519  
ENST0000066544,ENST00000446365,ENST00000526866,ENST00000527547,ENST00000531206  
ENST00000357491,ENST00000601693  
ENST00000596143,ENST00000600435  
ENST00000420713  
ENST00000264162

ENST00000287534,ENST00000370652,ENST00000394141,ENST00000394143,ENST00000412101  
ENST00000420713  
ENST00000261560,ENST00000261560  
ENST00000397104,ENST00000596209  
ENST00000250974,ENST00000292577,ENST00000590661,ENST00000591351  
ENST00000339986  
ENST00000261560  
ENST00000274609  
ENST00000300870  
ENST00000297405,ENST00000339701,ENST00000343508,ENST00000352409,ENST00000455883  
ENST00000342944,ENST00000357002  
ENST00000300619,ENST00000397082  
ENST00000596143,ENST00000600435  
ENST00000595405,ENST00000601440  
ENST00000395385,ENST00000402377  
ENST00000419098  
ENST00000289953,ENST00000357199  
ENST00000594710  
ENST00000418100  
ENST00000331162  
ENST00000354959,ENST00000594012,ENST00000595461,ENST00000598381  
ENST00000548032  
ENST00000355849,ENST00000524199  
ENST00000373361,ENST00000373367,ENST00000541184  
ENST00000434783  
ENST00000287534,ENST00000370652,ENST00000394141,ENST00000394143,ENST00000412101  
ENST00000434783  
ENST00000495679  
ENST00000551456  
ENST00000066544,ENST00000446365,ENST00000526866,ENST00000527547,ENST00000531206  
ENST00000362068  
ENST00000264162  
ENST00000265071,ENST00000514738  
ENST00000542267  
ENST00000415164  
ENST00000289953,ENST00000357199  
ENST00000548213  
ENST00000264852,ENST00000393830  
ENST00000373361,ENST00000373367,ENST00000541184  
ENST00000264852,ENST00000393830  
ENST00000551456  
ENST00000548213  
ENST00000495679  
ENST00000434783,ENST00000434783  
ENST00000362068  
ENST00000265071,ENST00000514738  
ENST00000542267

ENST00000415164  
ENST00000066544,ENST00000446365,ENST00000526866,ENST00000527547,ENST00000531206  
ENST00000264162  
ENST00000287534,ENST00000370652,ENST00000394141,ENST00000394143,ENST00000412101  
ENST00000434783  
ENST00000289953,ENST00000357199  
ENST00000566450  
ENST00000271688,ENST00000368949,ENST00000368954,ENST00000561294  
ENST00000373361,ENST00000373367,ENST00000541184  
ENST00000287534,ENST00000370652,ENST00000394141,ENST00000394143,ENST00000412101  
ENST00000357491,ENST00000601693  
ENST00000495679  
ENST00000551456  
ENST00000407622  
ENST00000530440  
ENST00000355849,ENST00000524199  
ENST00000362068  
ENST00000264162  
ENST00000265071,ENST00000514738  
ENST00000362068  
ENST00000542267  
ENST00000289953,ENST00000357199  
ENST00000520112  
ENST00000361789  
ENST00000264852,ENST00000393830  
ENST00000373361,ENST00000373367,ENST00000541184  
ENST00000264852,ENST00000393830  
ENST00000551456  
ENST00000495679  
ENST00000271688,ENST00000368949,ENST00000368954,ENST00000561294  
ENST00000362068  
ENST00000265071,ENST00000514738  
ENST00000542267  
ENST00000361789  
ENST00000407622  
ENST00000264162  
ENST00000287534,ENST00000370652,ENST00000394141,ENST00000394143,ENST00000412101  
ENST00000530440  
ENST00000357491,ENST00000601693  
ENST00000289953,ENST00000357199  
ENST00000520112  
ENST00000355849,ENST00000524199  
ENST00000566450  
ENST00000362068  
ENST00000264515,ENST00000367164  
ENST00000226253,ENST00000395319,ENST00000395321  
ENST00000333371,ENST00000535843,ENST00000535906

ENST00000326587,ENST00000375695,ENST00000375722,ENST00000375772  
ENST00000355281  
ENST00000356878,ENST00000512229,ENST00000530339  
ENST00000268876,ENST00000378449,ENST00000394570,ENST00000433649,ENST00000591048  
ENST00000379485,ENST00000499385  
ENST00000298232,ENST00000342420,ENST00000361285  
ENST00000480623  
ENST00000337908,ENST00000355131,ENST00000395016,ENST00000532114  
ENST00000262374,ENST00000544428,ENST00000588623  
ENST00000308488,ENST00000360355,ENST00000480887,ENST00000531026  
ENST00000472091,ENST00000542862  
ENST00000261292,ENST00000577628,ENST00000580036  
ENST00000305799,ENST00000409262  
ENST00000226253,ENST00000395319,ENST00000395321  
ENST00000356878,ENST00000512229,ENST00000530339  
ENST00000326587,ENST00000375695,ENST00000375722,ENST00000375772  
ENST00000337908,ENST00000355131,ENST00000395016,ENST00000532114  
ENST00000298232,ENST00000342420,ENST00000361285  
ENST00000268876,ENST00000378449,ENST00000394570,ENST00000433649,ENST00000591048  
ENST00000379485,ENST00000499385  
ENST00000262374,ENST00000544428,ENST00000588623  
ENST00000480623  
ENST00000472091,ENST00000542862  
ENST00000355281  
ENST00000308488,ENST00000360355,ENST00000480887,ENST00000531026  
ENST00000305799,ENST00000409262  
ENST00000333371,ENST00000535843,ENST00000535906  
ENST00000264515,ENST00000367164  
ENST00000261292,ENST00000577628,ENST00000580036  
ENST00000000442,ENST00000405666,ENST00000406310  
ENST00000392825,ENST00000409237  
ENST00000308873,ENST00000338888,ENST00000399916,ENST00000540420  
ENST00000261609,ENST00000564734  
ENST00000299314,ENST00000549940  
ENST00000320316,ENST00000454255,ENST00000570899,ENST00000571362,ENST00000573826  
ENST00000000442,ENST00000405666,ENST00000406310,ENST00000545035  
ENST00000308873,ENST00000338888,ENST00000399916,ENST00000540420  
ENST00000261609,ENST00000564734  
ENST00000299314,ENST00000549940  
ENST00000320316,ENST00000454255,ENST00000570899,ENST00000571362,ENST00000573826  
ENST00000392825,ENST00000409237  
ENST00000304414,ENST00000546206,ENST00000567078  
ENST00000217254,ENST00000381944  
ENST00000341776,ENST00000397311  
ENST00000237455  
ENST00000373644  
ENST00000427255



ENST00000265724,ENST00000543898  
ENST00000373275  
ENST00000242465  
ENST00000338647  
ENST00000518907,ENST00000520284  
ENST00000422453,ENST00000441626,ENST00000451728,ENST00000504813,ENST00000512338  
ENST00000303749,ENST00000396721,ENST00000522671  
ENST00000380229  
ENST00000389840,ENST00000585328  
ENST00000216190,ENST00000405442,ENST00000455547,ENST00000541106  
ENST00000318388,ENST00000400033  
ENST00000353479,ENST00000369733,ENST00000393211  
ENST00000301938,ENST00000308799,ENST00000395665,ENST00000395667  
ENST00000398559,ENST00000543976  
ENST00000287647,ENST00000383806,ENST00000383807,ENST00000419585  
ENST00000288040,ENST00000393701,ENST00000449317,ENST00000568461  
ENST00000367070  
ENST00000301938,ENST00000308799,ENST00000395665,ENST00000395667  
ENST00000217254,ENST00000381944  
ENST00000427255  
ENST00000341776,ENST00000397311  
ENST00000373275  
ENST00000288040,ENST00000393701,ENST00000449317,ENST00000568461  
ENST00000304414,ENST00000546206,ENST00000567078  
ENST00000237455  
ENST00000389840,ENST00000585328  
ENST00000380229  
ENST00000367070  
ENST00000398559,ENST00000543976  
ENST00000216190,ENST00000405442,ENST00000455547,ENST00000541106  
ENST00000265724,ENST00000543898  
ENST00000446936,ENST00000502976  
ENST00000303749,ENST00000396721,ENST00000522671  
ENST00000338647  
ENST00000373644  
ENST00000242465  
ENST00000318388,ENST00000400033  
ENST00000353479,ENST00000369733,ENST00000393211  
ENST00000287647,ENST00000383806,ENST00000383807,ENST00000419585  
ENST00000518907,ENST00000520284  
ENST00000398706,ENST00000603114,ENST00000604524,ENST00000604729,ENST00000605216  
ENST00000339953  
ENST00000345005,ENST00000352989,ENST00000395066,ENST00000563842,ENST00000566926  
ENST00000370598  
ENST00000400664  
ENST00000261532,ENST00000380887,ENST00000505752,ENST00000509242,ENST00000512784,ENST00000512784,ENST00000512784  
ENST00000272746,ENST00000359761,ENST00000392546,ENST00000392547,ENST00000409891

ENST00000464439  
ENST00000246012,ENST00000449810  
ENST00000270223,ENST00000377735  
ENST00000310931,ENST00000391975,ENST00000391976,ENST00000427183  
ENST00000340446  
ENST00000254579,ENST00000527990  
ENST00000392027  
ENST00000270223,ENST00000377735  
ENST00000400664  
ENST00000254579,ENST00000527990  
ENST00000398706,ENST00000603114,ENST00000604524,ENST00000604729,ENST00000605216  
ENST00000345005,ENST00000352989,ENST00000395066,ENST00000563842,ENST00000566926  
ENST00000272746,ENST00000359761,ENST00000392546,ENST00000392547,ENST00000409891  
ENST00000464439  
ENST00000339953  
ENST00000392027  
ENST00000246012,ENST00000449810  
ENST00000261532,ENST00000380887,ENST00000505752,ENST00000509242,ENST00000512784,ENST00000:  
ENST00000370598  
ENST00000340446  
ENST00000310931,ENST00000391975,ENST00000391976,ENST00000427183  
ENST00000233609,ENST00000585665,ENST00000586096,ENST00000586656,ENST00000586686,ENST00000:  
ENST00000354981,ENST00000355755,ENST00000408042  
ENST00000249373  
ENST00000231137  
ENST00000462323,ENST00000463781,ENST00000466475,ENST00000470451,ENST00000475231,ENST00000:  
ENST00000296498  
ENST00000359191,ENST00000402194,ENST00000432763,ENST00000598725,ENST00000599117  
ENST00000302787  
ENST00000400681  
ENST00000291281,ENST00000433867,ENST00000595515,ENST00000600194,ENST00000601806  
ENST00000377984,ENST00000388950,ENST00000423537  
ENST00000249373  
ENST00000302787  
ENST00000231137  
ENST00000233609,ENST00000586096,ENST00000586686,ENST00000589656,ENST00000593052  
ENST00000291281,ENST00000433867,ENST00000595515,ENST00000600194,ENST00000601806  
ENST00000377984,ENST00000388950,ENST00000423537  
ENST00000354981,ENST00000355755,ENST00000408042  
ENST00000359191,ENST00000402194,ENST00000432763,ENST00000598725,ENST00000599117  
ENST00000462323,ENST00000463781,ENST00000466475,ENST00000470451,ENST00000475231,ENST00000:  
ENST00000296498  
ENST00000400681



1\_153186

1\_012196

3717,NM\_001332

1033,NM\_004727

13412,NM\_001258413,NM\_001258414,NM\_052944

1415,NM\_001291416,NM\_001291417,NM\_001291418,NM\_001291421,NM\_021140

1846,NM\_001274

55

3272,NM\_003925  
A\_012196

3000,NM\_005869

3717,NM\_001332

415,NM\_001291416,NM\_001291417,NM\_001291418,NM\_001291421,NM\_021140

.000268,NM\_016418,NM\_181825,NM\_181828,NM\_181829,NM\_181830,NM\_181831,NM\_181832

61

4\_025008

3477,NM\_001318478,NM\_001318479,NM\_015516

l,NM\_001318091,NM\_001318093,NM\_001318094  
l128224,NM\_001128224

l303232,NM\_001303232,NM\_005807,NM\_005807,NM\_001127708,NM\_001127708,NM\_001127709,NM\_001

3717,NM\_001332  
l142530,NM\_030639,NM\_001142524,NM\_001142525,NM\_001142526,NM\_001142527,NM\_001142528,NM\_

l269046,NM\_001269047,NM\_001269048,NM\_001269051,NM\_001269052,NM\_080618,NM\_001269040,NM\_



l303232,NM\_001303232,NM\_005807,NM\_005807

l269046,NM\_001269047,NM\_001269048,NM\_001269051,NM\_001269052,NM\_080618

l142530,NM\_030639

l\_012196

55

.015560,NM\_130831,NM\_130832,NM\_130833,NM\_130834,NM\_130835,NM\_130836,NM\_130837

l,NM\_001318091,NM\_001318093,NM\_001318094

3717,NM\_001332

709,NM\_001127710,NM\_001303232,NM\_005807  
1,NM\_001288975,NM\_003474,NM\_021641

4\_012196

.015560,NM\_130831,NM\_130832,NM\_130833,NM\_130834,NM\_130835,NM\_130836,NM\_130837

3717,NM\_001332

7709,NM\_001127710,NM\_001303232,NM\_005807

!508,NM\_001302509,NM\_001302510,NM\_004530

.015560,NM\_130831,NM\_130832,NM\_130833,NM\_130834,NM\_130835,NM\_130836,NM\_130837

!318796,NM\_003264,NM\_001318787,NM\_001318789,NM\_001318790,NM\_001318791,NM\_001318793,NM\_!  
!390,NM\_000888,NM\_001282353,NM\_001282354,NM\_001282355,NM\_001282388,NM\_001282389,NM\_001

!318796,NM\_003264

1390

},NM\_001195799,NM\_001195800,NM\_001195803

1322830,NM\_001322832,NM\_001322835,NM\_001322836,NM\_001322837,NM\_001322838,NM\_002247,NM\_

},NM\_001243730,NM\_001243731,NM\_001243732

1322830,NM\_001322832,NM\_001322835,NM\_001322836,NM\_001322837,NM\_001322838,NM\_002247

1393,NM\_001164380,NM\_001164381,NM\_001164382,NM\_001164383,NM\_001164384,NM\_001164385,NM\_

61

5058,NM\_001190348,NM\_001190349,NM\_033317

1393

4\_012196

61

1322886,NM\_001322887,NM\_001322888,NM\_001322889,NM\_001322890,NM\_001322891,NM\_001322892,N

5058,NM\_001190348,NM\_001190349,NM\_033317

1322886,NM\_001322887,NM\_001322888,NM\_001322889,NM\_001322890,NM\_001322891,NM\_001322892,N

61

0532,NM\_207521,NM\_001321859,NM\_001321860,NM\_001321861,NM\_001321862,NM\_001321863,NM\_001

1322886,NM\_001322887,NM\_001322888,NM\_001322889,NM\_001322890,NM\_001322891,NM\_001322892,N

1,NM\_001318091,NM\_001318093,NM\_001318094

1054,NM\_004549

1058,NM\_001190348,NM\_001190349,NM\_033317



1\_012485

1\_182982

1322886,NM\_001322887,NM\_001322888,NM\_001322889,NM\_001322890,NM\_001322891,NM\_001322892,N

0532,NM\_207521

0322886,NM\_001322887,NM\_001322888,NM\_001322889,NM\_001322890,NM\_001322891,NM\_001322892,N  
0322886,NM\_001322887,NM\_001322888,NM\_001322889,NM\_001322890,NM\_001322891,NM\_001322892,N

0376,NM\_021235

0868,NM\_001516

0842,NM\_001318847,NM\_001318848,NM\_001318857,NM\_001318858,NM\_006586

0162,NM\_006677



.000268,NM\_016418,NM\_181825,NM\_181828,NM\_181829,NM\_181830,NM\_181831,NM\_181832

47

583,NM\_020901

.198838,NM\_198839

832,NM\_000548,NM\_001077183,NM\_001114382,NM\_001318827,NM\_001318829,NM\_001318831,NM\_001

71,NM\_020952,NM\_024971,NM\_206944,NM\_206945,NM\_206946,NM\_206947

832

4\_012196

.000268,NM\_016418,NM\_181825,NM\_181828,NM\_181829,NM\_181830,NM\_181831,NM\_181832

1\_012196

61

1\_012196

5488,NM\_004487

5630,NM\_032643

.000268,NM\_016418,NM\_181825,NM\_181828,NM\_181829,NM\_181830,NM\_181831,NM\_181832  
1318119,NM\_001318120,NM\_016211,NM\_001077206,NM\_001077207,NM\_001077208,NM\_001191049,NM\_

1318119,NM\_001318120,NM\_016211

13148,NM\_015575

1\_145862

709,NM\_001127710,NM\_001303232,NM\_005807

899,NM\_001282900,NM\_001282901,NM\_007023

!899,NM\_001282900,NM\_001282901,NM\_007023

1\_012196



500,NM\_003905

500,NM\_003905

500,NM\_003905

500,NM\_003905

238,NM\_001199239,NM\_001199240,NM\_033177

153,NM\_001242868,NM\_001242869,NM\_001242870,NM\_001242871,NM\_144595

.181832,NM\_181833

.181832,NM\_181833

1323086,NM\_001323087,NM\_001323088,NM\_001323090  
.181832,NM\_181833

.181832,NM\_181833

.181832,NM\_181833

!,NM\_001291628,NM\_030621,NM\_177438

449052,ENST00000538115,ENST00000542585,ENST00000546292

445192,ENST00000533951

409914

445192

356920,ENST00000357462,ENST00000357462,ENST00000357462,ENST00000357462,ENST00000357462,ENST

358464,ENST00000439954,ENST00000439954,ENST00000439954

348028,ENST00000348028,ENST00000348028,ENST00000348028,ENST00000349350,ENST00000349350,ENST  
367482,ENST00000367482,ENST00000367483,ENST00000367483,ENST00000367483,ENST00000367483,ENST

355078,ENST00000355078,ENST00000355078,ENST00000355078,ENST00000355078,ENST00000518825,ENST  
355193,ENST00000558084,ENST00000558084,ENST00000558084  
360967,ENST00000360967,ENST00000360967,ENST00000361163,ENST00000361163,ENST00000361163,ENST  
367484,ENST00000367484,ENST00000367484,ENST00000367484,ENST00000367484,ENST00000367485,ENST  
367482,ENST00000367483,ENST00000367483,ENST00000367483,ENST00000367483,ENST00000367483,ENST  
355193,ENST00000424877,ENST00000424877,ENST00000424877

449052,ENST00000538115,ENST00000542585,ENST00000546292

555528,ENST00000555926

445192,ENST00000533951

409914

445192

349310,ENST00000349310,ENST00000402615,ENST00000402615,ENST00000402615,ENST00000402615,ENST

356920,ENST00000357462,ENST00000357462,ENST00000357462,ENST00000357462,ENST00000357462,ENST  
357462,ENST00000357462,ENST00000357462,ENST00000360967,ENST00000360967,ENST00000360967,ENST

358464,ENST00000439954,ENST00000439954,ENST00000439954

348028,ENST00000348028,ENST00000348028,ENST00000348028,ENST00000349350,ENST00000349350,ENST  
367482,ENST00000367482,ENST00000367483,ENST00000367483,ENST00000367483,ENST00000367483,ENST

355078,ENST00000355078,ENST00000355078,ENST00000355078,ENST00000355078,ENST00000518825,ENST  
355193,ENST00000558084,ENST00000558084,ENST00000558084  
360967,ENST00000360967,ENST00000360967,ENST00000361163,ENST00000361163,ENST00000361163,ENST  
357462,ENST00000357462,ENST00000357462,ENST00000360967,ENST00000360967,ENST00000360967,ENST

367484,ENST00000367484,ENST00000367484,ENST00000367484,ENST00000367484,ENST00000367485,ENST  
367482,ENST00000367483,ENST00000367483,ENST00000367483,ENST00000367483,ENST00000367483,ENST  
355193,ENST00000424877,ENST00000424877,ENST00000424877

506773,ENST00000511167,ENST00000511328,ENST00000512017,ENST00000513186

555375,ENST00000556155

393494,ENST00000393498,ENST00000393500,ENST00000403559,ENST00000408937

448038,ENST00000537033,ENST00000540663

368282,ENST00000368282,ENST00000368282,ENST00000368282,ENST00000368282,ENST00000368284,ENST  
350908,ENST00000350908,ENST00000350908,ENST00000350908,ENST00000350908,ENST00000360232,ENST

300134,ENST00000300134,ENST00000454075,ENST00000454075,ENST00000454075,ENST00000454075,ENST  
357825,ENST00000543397,ENST00000543397,ENST00000543397  
542587,ENST00000586703,ENST00000586703,ENST00000586703

520539,ENST00000521922,ENST00000521922,ENST00000521922  
310816,ENST00000310816,ENST00000310816,ENST00000310816,ENST00000310816,ENST00000359221,ENST

358464,ENST00000439954,ENST00000439954,ENST00000439954

265368,ENST00000265368,ENST00000265368,ENST00000341594,ENST00000341594,ENST00000341594,ENST

349384,ENST00000349384,ENST00000349384,ENST00000349384,ENST00000349384,ENST00000379933,ENST  
369338,ENST00000369338,ENST00000369338,ENST00000369339,ENST00000369339,ENST00000369339,ENST

447268,ENST00000580206,ENST00000580206,ENST00000580206

375398,ENST00000375398,ENST00000375398,ENST00000375398,ENST00000375398,ENST00000375400,ENST

434526,ENST00000437307,ENST00000451338

602114

506773,ENST00000511167,ENST00000511328,ENST00000512017,ENST00000513186

555375,ENST00000556155

536585



393494,ENST00000393498,ENST00000393500,ENST00000403559,ENST00000408937

591111

557798,ENST00000561030,ENST00000561030,ENST00000561030

368282,ENST00000368282,ENST00000368282,ENST00000368282,ENST00000368282,ENST00000368284,ENST

350908,ENST00000350908,ENST00000350908,ENST00000350908,ENST00000350908,ENST00000360232,ENST

355193,ENST00000558084,ENST00000558084,ENST00000558084

300134,ENST00000300134,ENST00000454075,ENST00000454075,ENST00000454075,ENST00000454075,ENST

542587,ENST00000586703,ENST00000586703,ENST00000586703

520539,ENST00000521922,ENST00000521922,ENST00000521922

373629,ENST00000373629,ENST00000373629,ENST00000373631,ENST00000373631,ENST00000373631,ENST

342175,ENST00000342992,ENST00000342992,ENST00000342992,ENST00000342992,ENST00000342992,ENST

356521,ENST00000356521,ENST00000356521,ENST00000377400,ENST00000377400,ENST00000377400,ENST  
310816,ENST00000310816,ENST00000310816,ENST00000310816,ENST00000310816,ENST00000359221,ENST

355385,ENST00000495514,ENST00000495514,ENST00000495514  
580762,ENST00000582535,ENST00000582535,ENST00000582535

368331,ENST00000437809,ENST00000437809,ENST00000437809

596931,ENST00000602114,ENST00000602114,ENST00000602114  
538346,ENST00000550620,ENST00000550620,ENST00000550620

275607,ENST00000275607,ENST00000275607,ENST00000395435,ENST00000395435,ENST00000395435,ENST

447268,ENST00000580206,ENST00000580206,ENST00000580206

287008,ENST00000357517,ENST00000357517,ENST00000357517,ENST00000357517,ENST00000357517,ENST  
375398,ENST00000375398,ENST00000375398,ENST00000375398,ENST00000375398,ENST00000375400,ENST

358464,ENST00000439954,ENST00000439954,ENST00000439954

535621,ENST00000563679,ENST00000567306,ENST00000569715

506773,ENST00000511167,ENST00000511328,ENST00000512017,ENST00000513186  
555375,ENST00000556155

393494,ENST00000393498,ENST00000393500,ENST00000403559,ENST00000408937

449052,ENST00000538115,ENST00000542585,ENST00000546292

445192  
350908,ENST00000350908,ENST00000350908,ENST00000350908,ENST00000350908,ENST00000360232,ENST

325823,ENST00000325823,ENST00000325823,ENST00000325823,ENST00000396410,ENST00000396410,ENST  
300134,ENST00000300134,ENST00000454075,ENST00000454075,ENST00000454075,ENST00000454075,ENST

542587,ENST00000586703,ENST00000586703,ENST00000586703

520539,ENST00000521922,ENST00000521922,ENST00000521922  
310816,ENST00000310816,ENST00000310816,ENST00000310816,ENST00000310816,ENST00000359221,ENST

375398,ENST00000375398,ENST00000375398,ENST00000375398,ENST00000375398,ENST00000375400,ENST

348028,ENST00000348028,ENST00000348028,ENST00000348028,ENST00000349350,ENST00000349350,ENST  
367482,ENST00000367483,ENST00000367483,ENST00000367483,ENST00000367483,ENST00000367483,ENST

468211

331920,ENST00000375274,ENST00000375274,ENST00000375274,ENST00000375274,ENST00000375274,ENST

355193,ENST00000558665,ENST00000558665,ENST00000558665

429972,ENST00000490882,ENST00000493452

295956,ENST00000295956,ENST00000295956,ENST00000348383,ENST00000348383,ENST00000348383,ENST

370163,ENST00000370165

391828

447207,ENST00000538201

455263,ENST00000509690,ENST00000514944

407925,ENST00000418533

474710,ENST00000481632

536126,ENST00000543718

379249,ENST00000379255,ENST00000379264,ENST00000379272,ENST00000413683,ENST00000431707,ENST

393920,ENST00000393921,ENST00000416020,ENST00000425182,ENST00000430273,ENST00000431963,ENST

596534,ENST00000601023,ENST00000601023

344930,ENST00000356929,ENST00000358296,ENST00000395385,ENST00000395391,ENST00000397082,ENST

449052,ENST00000538115,ENST00000542585,ENST00000546292

521353,ENST00000522736

449052,ENST00000538115,ENST00000542585,ENST00000546292

394616,ENST00000394617,ENST00000489216

358296,ENST00000395391,ENST00000423627,ENST00000596534,ENST00000601023

422782,ENST00000428879,ENST00000428879,ENST00000428879  
422782,ENST00000428879,ENST00000428879,ENST00000428879  
422782,ENST00000428879,ENST00000428879,ENST00000428879

349807,ENST00000349807,ENST00000349807,ENST00000353004,ENST00000353004,ENST00000353004,ENST  
333478,ENST00000333478,ENST00000333478,ENST00000333478,ENST00000333478,ENST00000421160,ENST

397412,ENST00000436138,ENST00000436138,ENST00000436138

393151,ENST00000393151,ENST00000393151,ENST00000553484,ENST00000553484,ENST00000553484,ENST  
393006,ENST00000393006,ENST00000393006,ENST00000409658,ENST00000409658,ENST00000409658,ENST

580762,ENST00000582535,ENST00000582535,ENST00000582535  
580762,ENST00000582535,ENST00000582535,ENST00000582535  
580762,ENST00000582535,ENST00000582535,ENST00000582535  
519445,ENST00000521134,ENST00000521134,ENST00000521134

525639,ENST00000527447,ENST00000527447,ENST00000527447  
389131,ENST00000389131,ENST00000518083,ENST00000518083,ENST00000518083,ENST00000518083,ENST

376071,ENST00000376071,ENST00000376071,ENST00000376072,ENST00000376072,ENST00000376072,ENST

294724,ENST00000294724,ENST00000361302,ENST00000361302,ENST00000361302,ENST00000361302,ENST

433625,ENST00000433625,ENST00000433625,ENST00000480623,ENST00000480623,ENST00000480623,ENST

452676,ENST00000601469,ENST00000601469,ENST00000601469

594012,ENST00000594012,ENST00000594012,ENST00000595461,ENST00000595461,ENST00000595461,ENST  
411502,ENST00000411502,ENST00000411502,ENST00000411502,ENST00000411502,ENST00000546047,ENST

345030,ENST00000345030,ENST00000345030,ENST00000596534,ENST00000596534,ENST00000596534,ENST

395391,ENST00000423627,ENST00000423627,ENST00000423627



296869,ENST00000296869,ENST00000296869,ENST00000296869,ENST00000296869,ENST00000296869,ENST

370891,ENST00000557284,ENST00000557284,ENST00000557284

400226,ENST00000400226,ENST00000400226

395391,ENST00000423627,ENST00000423627,ENST00000423627

598265,ENST00000602198,ENST00000602198,ENST00000602198

401393,ENST00000558357,ENST00000558357,ENST00000558357

277549,ENST00000277551,ENST00000277551,ENST00000277551,ENST00000277551,ENST00000277551,ENST

323594,ENST00000510913,ENST00000510913,ENST00000510913

442594,ENST00000536534,ENST00000536534,ENST00000536534

549091,ENST00000552728,ENST00000552728,ENST00000552728

369338,ENST00000369338,ENST00000369338,ENST00000369339,ENST00000369339,ENST00000369339,ENST

381469,ENST00000432757,ENST00000432757,ENST00000432757

354959,ENST00000354959,ENST00000354959,ENST00000397082,ENST00000397082,ENST00000397082,ENST

559607,ENST00000560079,ENST00000560079,ENST00000560079

358357,ENST00000358357,ENST00000358357,ENST00000358357,ENST00000358357,ENST00000395270,ENST

376237,ENST00000383329,ENST00000383329,ENST00000383329

502818,ENST00000502818,ENST00000502818,ENST00000502818,ENST00000502818,ENST00000511604,ENST

338821,ENST00000402822,ENST00000402822,ENST00000402822

355725,ENST00000491737,ENST00000491737,ENST00000491737

359735,ENST00000359735,ENST00000359735,ENST00000359735,ENST00000359735,ENST00000397136,ENST

573283,ENST00000573283,ENST00000573283,ENST00000573283,ENST00000573283,ENST00000575087,ENST

336119,ENST00000348069,ENST00000348069,ENST00000348069,ENST00000348069,ENST00000348069,ENST  
369338,ENST00000490598,ENST00000490598,ENST00000490598

394066,ENST00000394066,ENST00000394066,ENST00000394066,ENST00000394066,ENST00000394067,ENST  
374542,ENST00000374542,ENST00000374542,ENST00000374542,ENST00000374542,ENST00000414083,ENST

531805,ENST00000532828,ENST00000532828,ENST00000532828  
345030,ENST00000345030,ENST00000345030,ENST00000596534,ENST00000596534,ENST00000596534,ENST  
399222,ENST00000399222,ENST00000399222,ENST00000399222,ENST00000399222,ENST00000399232,ENST

376020,ENST00000460112,ENST00000460112,ENST00000460112

359530,ENST00000359530,ENST00000359530,ENST00000396774,ENST00000396774,ENST00000396774,ENST  
432063,ENST00000432063,ENST00000432063,ENST00000535545,ENST00000535545,ENST00000535545,ENST  
357258,ENST00000357258,ENST00000393785,ENST00000393785,ENST00000393785,ENST00000393785,ENST

276344,ENST00000276344,ENST00000276344,ENST00000276344,ENST00000276344,ENST00000276344,ENST  
269844,ENST00000269844,ENST00000398548,ENST00000398548,ENST00000398548,ENST00000398548,ENST

278460,ENST00000278460,ENST00000378615,ENST00000378615,ENST00000378615,ENST00000378615,ENST

354476,ENST00000354476,ENST00000390003,ENST00000390003,ENST00000390003,ENST00000390003,ENST

345030,ENST00000345030,ENST00000345030,ENST00000596534,ENST00000596534,ENST00000596534,ENST

314686,ENST00000314686,ENST00000429348,ENST00000429348,ENST00000429348,ENST00000429348,ENST  
401494,ENST00000401494,ENST00000401494,ENST00000401494,ENST00000401494,ENST00000415165,ENST  
378526,ENST00000378526,ENST00000378526,ENST00000585941,ENST00000585941,ENST00000585941,ENST

269305,ENST00000269305,ENST00000269305,ENST00000359597,ENST00000359597,ENST00000359597,ENST

343984,ENST00000343984,ENST00000343984,ENST00000354228,ENST00000354228,ENST00000354228,ENST  
393151,ENST00000393151,ENST00000393151,ENST00000553484,ENST00000553484,ENST00000553484,ENST  
348028,ENST00000348028,ENST00000348028,ENST00000348028,ENST00000348028,ENST00000348028,ENST  
348028,ENST00000348028,ENST00000348028,ENST00000348028,ENST00000349350,ENST00000349350,ENST

465038,ENST00000541979

370163,ENST00000370165

455263,ENST00000509690,ENST00000514944

379249,ENST00000379255,ENST00000379264,ENST00000379272,ENST00000413683,ENST00000431707,ENST

349807,ENST00000349807,ENST00000349807,ENST00000353004,ENST00000353004,ENST00000353004,ENST  
349097,ENST00000349097,ENST00000349097,ENST00000395477,ENST00000395477,ENST00000395477,ENST  
397412,ENST00000436138,ENST00000436138,ENST00000436138

309065,ENST00000309065,ENST00000309065,ENST00000506583,ENST00000506583,ENST00000506583,ENST  
360488,ENST00000377850,ENST00000377850,ENST00000377850  
360488,ENST00000377850,ENST00000377850,ENST00000377850  
525639,ENST00000527447,ENST00000527447,ENST00000527447  
389131,ENST00000389131,ENST00000518083,ENST00000518083,ENST00000518083,ENST00000518083,ENST

294724,ENST00000294724,ENST00000361302,ENST00000361302,ENST00000361302,ENST00000361302,ENST

379500,ENST00000533953,ENST00000533953,ENST00000533953

352853,ENST00000352853,ENST00000359524,ENST00000359524,ENST00000359524,ENST00000359524,ENST

420871,ENST00000456556,ENST00000456556,ENST00000456556  
296869,ENST00000296869,ENST00000296869,ENST00000296869,ENST00000296869,ENST00000296869,ENST  
585744,ENST00000588462,ENST00000588462,ENST00000588462  
357674,ENST00000450955,ENST00000450955,ENST00000450955

323594,ENST00000510913,ENST00000510913,ENST00000510913  
442594,ENST00000536534,ENST00000536534,ENST00000536534  
446747,ENST00000446747,ENST00000446747,ENST00000528372,ENST00000528372,ENST00000528372,ENST  
549091,ENST00000552728,ENST00000552728,ENST00000552728

355725,ENST00000491737,ENST00000491737,ENST00000491737

370918,ENST00000370918,ENST00000370918,ENST00000541407,ENST00000541407,ENST00000541407,ENST

376020,ENST00000460112,ENST00000460112,ENST00000460112

522628,ENST00000543296,ENST00000543296,ENST00000543296

508491,ENST00000543251,ENST00000543251,ENST00000543251

520539,ENST00000521922,ENST00000521922,ENST00000521922

348639,ENST00000559658,ENST00000559658,ENST00000559658

269305,ENST00000269305,ENST00000269305,ENST00000359597,ENST00000359597,ENST00000359597,ENST

434436,ENST00000434436,ENST00000434436,ENST00000590550,ENST00000590550,ENST00000590550,ENST

355327,ENST00000357769,ENST00000357769,ENST00000357769

465038,ENST00000541979

370163,ENST00000370165

455263,ENST00000509690,ENST00000514944

379249,ENST00000379255,ENST00000379264,ENST00000379272,ENST00000413683,ENST00000431707,ENST

349807,ENST00000349807,ENST00000349807,ENST00000353004,ENST00000353004,ENST00000353004,ENST  
349097,ENST00000349097,ENST00000349097,ENST00000395477,ENST00000395477,ENST00000395477,ENST  
397412,ENST00000436138,ENST00000436138,ENST00000436138

360488,ENST00000377850,ENST00000377850,ENST00000377850  
360488,ENST00000377850,ENST00000377850,ENST00000377850  
525639,ENST00000527447,ENST00000527447,ENST00000527447  
389131,ENST00000389131,ENST00000518083,ENST00000518083,ENST00000518083,ENST00000518083,ENST

294724,ENST00000294724,ENST00000361302,ENST00000361302,ENST00000361302,ENST00000361302,ENST  
338347,ENST00000338347,ENST00000338347

379500,ENST00000533953,ENST00000533953,ENST00000533953  
352853,ENST00000352853,ENST00000359524,ENST00000359524,ENST00000359524,ENST00000359524,ENST

296869,ENST00000296869,ENST00000296869,ENST00000296869,ENST00000296869,ENST00000296869,ENST  
357674,ENST00000450955,ENST00000450955,ENST00000450955

323594,ENST00000510913,ENST00000510913,ENST00000510913  
442594,ENST00000536534,ENST00000536534,ENST00000536534  
549091,ENST00000552728,ENST00000552728,ENST00000552728

355725,ENST00000491737,ENST00000491737,ENST00000491737  
370918,ENST00000370918,ENST00000370918,ENST00000541407,ENST00000541407,ENST00000541407,ENST

376020,ENST00000460112,ENST00000460112,ENST00000460112

522628,ENST00000543296,ENST00000543296,ENST00000543296

332647,ENST00000332647,ENST00000332647,ENST00000355813,ENST00000355813,ENST00000355813,ENST  
508491,ENST00000543251,ENST00000543251,ENST00000543251

348639,ENST00000559658,ENST00000559658,ENST00000559658

269305,ENST00000269305,ENST00000269305,ENST00000359597,ENST00000359597,ENST00000359597,ENST

367483,ENST00000367483,ENST00000367483,ENST00000367483,ENST00000367483,ENST00000367485,ENST  
372627,ENST00000372628,ENST00000372628,ENST00000372628

465038,ENST00000541979



370163,ENST00000370165  
371367,ENST00000371372,ENST00000545473

455263,ENST00000509690,ENST00000514944

380553,ENST00000380562,ENST00000380576,ENST00000380584,ENST00000417091,ENST00000428787,ENST

381885,ENST00000396923,ENST00000420765

564546,ENST00000564595,ENST00000564688,ENST00000566897,ENST00000569545,ENST00000569798

379249,ENST00000379255,ENST00000379264,ENST00000379272,ENST00000413683,ENST00000431707,ENST

349807,ENST00000349807,ENST00000349807,ENST00000353004,ENST00000353004,ENST00000353004,ENST  
397412,ENST00000436138,ENST00000436138,ENST00000436138

525639,ENST00000527447,ENST00000527447,ENST00000527447  
252034,ENST00000252034,ENST00000252034,ENST00000252034,ENST00000252034,ENST00000252034,ENST  
389131,ENST00000389131,ENST00000518083,ENST00000518083,ENST00000518083,ENST00000518083,ENST  
423602,ENST00000423602,ENST00000423602,ENST00000433283,ENST00000433283,ENST00000433283,ENST

294724,ENST00000294724,ENST00000361302,ENST00000361302,ENST00000361302,ENST00000361302,ENST  
564546,ENST00000564595,ENST00000564688,ENST00000565355,ENST00000566897,ENST00000569545,ENST

375122,ENST00000375127,ENST00000375127,ENST00000375127  
352853,ENST00000352853,ENST00000359524,ENST00000359524,ENST00000359524,ENST00000359524,ENST

535041,ENST00000543818,ENST00000543818,ENST00000543818  
296869,ENST00000296869,ENST00000296869,ENST00000296869,ENST00000296869,ENST00000296869,ENST

357674,ENST00000450955,ENST00000450955,ENST00000450955

323594,ENST00000510913,ENST00000510913,ENST00000510913

442594,ENST00000536534,ENST00000536534,ENST00000536534

549091,ENST00000552728,ENST00000552728,ENST00000552728

370621,ENST00000503581,ENST00000503581,ENST00000503581

359263,ENST00000359263,ENST00000359263,ENST00000359263,ENST00000359263,ENST00000371489,ENST

355725,ENST00000491737,ENST00000491737,ENST00000491737

488961,ENST00000553096,ENST00000553096,ENST00000553096

370918,ENST00000370918,ENST00000370918,ENST00000541407,ENST00000541407,ENST00000541407,ENST

334933,ENST00000334933,ENST00000334933,ENST00000348806,ENST00000348806,ENST00000348806,ENST

383806,ENST00000383806,ENST00000383806,ENST00000383807,ENST00000383807,ENST00000383807,ENST

376020,ENST00000460112,ENST00000460112,ENST00000460112

535481,ENST00000544910,ENST00000544910,ENST00000544910

522628,ENST00000543296,ENST00000543296,ENST00000543296

277549,ENST00000277549,ENST00000277549,ENST00000277551,ENST00000277551,ENST00000277551,ENST

375383,ENST00000375383,ENST00000375383,ENST00000375383,ENST00000375383,ENST00000375401,ENST

357248,ENST00000357248,ENST00000357248,ENST00000382194,ENST00000382194,ENST00000382194,ENST

269305,ENST00000269305,ENST00000269305,ENST00000359597,ENST00000359597,ENST00000359597,ENST

389175,ENST00000389175,ENST00000389175,ENST00000409270,ENST00000409270,ENST00000409270,ENST

555833,ENST00000556134

541205,ENST00000544327,ENST00000546215

261693,ENST00000261693,ENST00000261693,ENST00000339570,ENST00000339570,ENST00000339570,ENST  
392990,ENST00000555626,ENST00000555626,ENST00000555626

441024,ENST00000441024,ENST00000441024,ENST00000567188,ENST00000567188,ENST00000567188,ENST  
359357,ENST00000359357,ENST00000359357,ENST00000441566,ENST00000441566,ENST00000441566,ENST

261244,ENST00000261244,ENST00000354386,ENST00000354386,ENST00000354386,ENST00000354386,ENST

433979,ENST00000538779,ENST00000538779,ENST00000538779

247829,ENST00000247829,ENST00000247829,ENST00000393330,ENST00000393330,ENST00000393330,ENST

382871,ENST00000382871,ENST00000382871,ENST00000382874,ENST00000382874,ENST00000382874,ENST

407775,ENST00000407775,ENST00000407775,ENST00000517361,ENST00000517361,ENST00000517361,ENST  
392650,ENST00000424778,ENST00000424778,ENST00000424778

522041,ENST00000523676

452989,ENST00000606214

551598

367573,ENST00000526775

357123,ENST00000357123,ENST00000357123,ENST00000357123,ENST00000357123,ENST00000546244,ENST  
392142,ENST00000544041,ENST00000544041,ENST00000544041

435811,ENST00000454853,ENST00000454853,ENST00000454853  
434343,ENST00000513376,ENST00000513376,ENST00000513376

343141,ENST00000343141,ENST00000356436,ENST00000356436,ENST00000356436,ENST00000356436,ENST

381567,ENST00000400841,ENST00000400841,ENST00000400841  
432648,ENST00000446189,ENST00000446189,ENST00000446189

446702,ENST00000539053,ENST00000539053,ENST00000539053  
329245,ENST00000329245,ENST00000519139,ENST00000519139,ENST00000519139,ENST00000519139,ENST

357570,ENST00000357570,ENST00000358338,ENST00000358338,ENST00000358338,ENST00000358338,ENST

545626,ENST00000546254,ENST00000546254,ENST00000546254  
535842

574415,ENST00000575632

515826

394413,ENST00000394414,ENST00000453001,ENST00000504198,ENST00000508545

510071,ENST00000512052,ENST00000514667,ENST00000515170

450717,ENST00000541122,ENST00000589677,ENST00000590574

589123,ENST00000590282

603639,ENST00000604864

538974,ENST00000539331,ENST00000540783

527998,ENST00000529388,ENST00000531665,ENST00000533520,ENST00000534544

521891,ENST00000523809

455528

377885

417856,ENST00000421552,ENST00000461611

514678,ENST00000606977

591111

582857

438793,ENST00000455264

543262

452124,ENST00000460129

545844,ENST00000564288,ENST00000567887

584368

552432

486199

433949,ENST00000502686,ENST00000539382,ENST00000608263,ENST00000608425,ENST00000608440,ENST

545377



541717,ENST00000543751,ENST00000545008

603841

454569

435071,ENST00000443708,ENST00000455397,ENST00000458566

495488,ENST00000496965

548586,ENST00000549325,ENST00000549396,ENST00000550359,ENST00000550584,ENST00000552948

368301,ENST00000392353,ENST00000448611,ENST00000473598,ENST00000508500

382330,ENST00000392537,ENST00000411531,ENST00000414031,ENST00000424196,ENST00000427845,ENST

566059

530301,ENST00000530749,ENST00000544551

444341,ENST00000452260,ENST00000454909,ENST00000457005,ENST00000493952

531148,ENST00000533712

538883,ENST00000543994

553916

603808

430669,ENST00000437951

603841

541717,ENST00000543751,ENST00000545008

417856,ENST00000421552,ENST00000461611

452124,ENST00000460129

548586,ENST00000549325,ENST00000549396,ENST00000550359,ENST00000550584,ENST00000552948

450717,ENST00000541122,ENST00000589677,ENST00000590574

433949,ENST00000502686,ENST00000539382,ENST00000608263,ENST00000608425,ENST00000608440,ENST  
515826  
443708,ENST00000455397,ENST00000458566

539331,ENST00000540783

377885

486199

553916

394413,ENST00000394414,ENST00000453001,ENST00000504198,ENST00000508545

566059

552432

545844,ENST00000564288,ENST00000567887

438793,ENST00000455264

430669,ENST00000437951

513612,ENST00000514678,ENST00000606977

530301,ENST00000530749,ENST00000544551

368301,ENST00000392353,ENST00000448611,ENST00000473598,ENST00000508500

545377

531148,ENST00000533712

535842

434685,ENST00000603639,ENST00000604864

538883,ENST00000543994

527998,ENST00000529388,ENST00000531665,ENST00000533520,ENST00000534544

584368

600359

382330,ENST00000392537,ENST00000411531,ENST00000414031,ENST00000424196,ENST00000427845,ENST

591111

559411

589123,ENST00000590282



603808

509018,ENST00000510071,ENST00000512052,ENST00000515170

495488,ENST00000496965

521891,ENST00000523809

444341,ENST00000452260,ENST00000454909,ENST00000457005,ENST00000493952

455528

543262

449052,ENST00000538115,ENST00000542585,ENST00000546292

449052,ENST00000538115,ENST00000542585,ENST00000546292

439954

449052,ENST00000538115,ENST00000542585,ENST00000546292

449052,ENST00000538115,ENST00000542585,ENST00000546292

483968

449052,ENST00000538115,ENST00000542585,ENST00000546292

439954

483968

456556

449052,ENST00000538115,ENST00000542585,ENST00000546292

448089,ENST00000448691,ENST00000538248,ENST00000541601,ENST00000545230

539636

553300,ENST00000553753,ENST00000554383,ENST00000554455,ENST00000554539,ENST00000554969,ENST

448691,ENST00000538248,ENST00000541601,ENST00000545230,ENST00000425945

539636

439954

439954

553300,ENST00000553753,ENST00000554383,ENST00000554455,ENST00000554539,ENST00000554969,ENST

593214

477086,ENST00000477756,ENST00000478156,ENST00000479406,ENST00000480843

449052,ENST00000538115,ENST00000542585,ENST00000546292

449052,ENST00000538115,ENST00000542585,ENST00000546292

477086,ENST00000477756,ENST00000478156,ENST00000479406,ENST00000480843

477086,ENST00000477756,ENST00000478156,ENST00000479406,ENST00000480843

449052,ENST00000538115,ENST00000542585,ENST00000546292

449052,ENST00000538115,ENST00000542585,ENST00000546292



593214

477086,ENST00000477756,ENST00000478156,ENST00000479406,ENST00000480843,ENST00000462323,ENST

449052,ENST00000538115,ENST00000542585,ENST00000546292

477086,ENST00000477756,ENST00000478156,ENST00000479406,ENST00000480843

449052,ENST00000538115,ENST00000542585,ENST00000546292,ENST00000348028,ENST00000349350,ENST

477086,ENST00000477756,ENST00000478156,ENST00000479406,ENST00000480843

449052,ENST00000538115,ENST00000542585,ENST00000546292

449052,ENST00000538115,ENST00000542585,ENST00000546292

498644

498644

589119,ENST00000606248

453976,ENST00000491071,ENST00000517827,ENST00000517960,ENST00000518273,ENST00000520567,ENST

589119,ENST00000606248

453976,ENST00000491071,ENST00000517827,ENST00000517960,ENST00000518273,ENST00000520567,ENST

449052,ENST00000538115,ENST00000542585,ENST00000546292

449052,ENST00000538115,ENST00000542585,ENST00000546292

555723

598381

555723

449052,ENST00000538115,ENST00000542585,ENST00000546292

377386,ENST00000398263,ENST00000409015,ENST00000409232,ENST00000444342

449052,ENST00000538115,ENST00000542585,ENST00000546292

584074

576538

507280,ENST00000509064,ENST00000509452,ENST00000510651,ENST00000512470,ENST00000513723,ENST  
560658,ENST00000560801

587303,ENST00000588012,ENST00000592099

524845,ENST00000524904,ENST00000527403,ENST00000529710,ENST00000534190,ENST00000534534

584074

576538

507280,ENST00000509064,ENST00000509452,ENST00000510651,ENST00000512470,ENST00000513723,ENST

587303,ENST00000588012,ENST00000592099

560658,ENST00000560801

524845,ENST00000524904,ENST00000527403,ENST00000529710,ENST00000534190,ENST00000534534

595238,ENST00000600767  
540012

584074  
530740

582809

507280,ENST00000509064,ENST00000509452,ENST00000510651,ENST00000512470,ENST00000513723,ENST  
560658,ENST00000560801

449052,ENST00000538115,ENST00000542585,ENST00000546292  
415348,ENST00000430656,ENST00000456320,ENST00000522886

524845,ENST00000524904,ENST00000527403,ENST00000529710,ENST00000534190,ENST00000534534

540012  
584074

595238,ENST00000600767

415348,ENST00000430656,ENST00000456320,ENST00000522886

507280,ENST00000509064,ENST00000509452,ENST00000510651,ENST00000512470,ENST00000513723,ENST  
582809

560658,ENST00000560801

524845,ENST00000524904,ENST00000527403,ENST00000529710,ENST00000534190,ENST00000534534

449052,ENST00000538115,ENST00000542585,ENST00000546292

388743,ENST00000419131

530417,ENST00000534126,ENST00000534528

452003



402731,ENST00000404276,ENST00000405598,ENST00000416671,ENST00000417588,ENST00000433028,ENST

475125

388743,ENST00000419131

534126

475125

452003

433368

443539,ENST00000446190

429972,ENST00000490882,ENST00000493452

552788

457156

397043

397043

443539,ENST00000446190

429972,ENST00000490882,ENST00000493452

433368

552788

484451,ENST00000487473,ENST00000493611

478922,ENST00000481953,ENST00000498699

484451,ENST00000487473,ENST00000493611

478922,ENST00000481953,ENST00000498699

428097,ENST00000428648,ENST00000433959,ENST00000453256,ENST00000454227,ENST00000455023,ENST

540079,ENST00000541240,ENST00000543930,ENST00000562503,ENST00000562903,ENST00000564136,ENST

541205,ENST00000544327,ENST00000546215

593660,ENST00000593821,ENST00000601256,ENST00000601951,ENST00000602261

581031,ENST00000581094,ENST00000581148,ENST00000583994

487505,ENST00000490574

433722,ENST00000537108

433722,ENST00000537108

428097,ENST00000428648,ENST00000433959,ENST00000453256,ENST00000454227,ENST00000455023,ENST

487505,ENST00000490574

593660,ENST00000593821,ENST00000601256,ENST00000601951,ENST00000602261

541205,ENST00000544327,ENST00000546215

433722,ENST00000537108,ENST00000251071,ENST00000298892,ENST00000308433,ENST00000395805,ENST

442920

580392,ENST00000581031,ENST00000581094,ENST00000581148,ENST00000582602,ENST00000583994

540079,ENST00000541240,ENST00000543930,ENST00000562503,ENST00000562903,ENST00000564136,ENST

428097,ENST00000428648,ENST00000433959,ENST00000453256,ENST00000454227,ENST00000455023,ENST

521843

398209,ENST00000426930

487505,ENST00000490574

556766,ENST00000557376

601733

447267,ENST00000520168,ENST00000523483

422297,ENST00000423785,ENST00000425237,ENST00000444973,ENST00000447379,ENST00000539416,ENST

428097,ENST00000428648,ENST00000433959,ENST00000453256,ENST00000454227,ENST00000455023,ENST

487505,ENST00000490574

521843

438182

422297,ENST00000423785,ENST00000425237,ENST00000444973,ENST00000447379,ENST00000539416,ENST

447267,ENST00000520168,ENST00000523483  
556766,ENST00000557376  
598654,ENST00000601733

449052,ENST00000538115,ENST00000542585,ENST00000546213,ENST00000546292  
521676,ENST00000522420  
403642,ENST00000404276,ENST00000405598,ENST00000544772

521676,ENST00000522420  
449052,ENST00000538115,ENST00000542585,ENST00000546213,ENST00000546292  
403642,ENST00000404276,ENST00000405598,ENST00000544772

374650,ENST00000438843,ENST00000448480



407969,ENST00000413704

374650,ENST00000438843,ENST00000448480  
539875

409547,ENST00000423659,ENST00000440945,ENST00000452341

403642,ENST00000404276,ENST00000405598,ENST00000544772

409547,ENST00000423659,ENST00000440945,ENST00000452341

403642,ENST00000404276,ENST00000405598,ENST00000544772

539875



442782

464224,ENST00000483239,ENST00000494714,ENST00000525965,ENST00000529221,ENST00000529850,ENST

442782

464224,ENST00000483239,ENST00000494714,ENST00000525965,ENST00000529221,ENST00000529850,ENST

565494,ENST00000567435

567435

361676,ENST00000397789,ENST00000403435,ENST00000403999

600377,ENST00000601879

512970,ENST00000514566  
512970,ENST00000514566  
600377,ENST00000601879

361676,ENST00000397789,ENST00000403435,ENST00000403999

443581,ENST00000449557,ENST00000450102,ENST00000451551,ENST00000455624

457266  
490843,ENST00000545495

435716,ENST00000453485,ENST00000543084

555528,ENST00000555926

590602,ENST00000591436

555528,ENST00000555926

443581,ENST00000449557,ENST00000450102,ENST00000451551,ENST00000455624  
358464,ENST00000439954

457266

490843,ENST00000545495

456154  
453485,ENST00000543084

590602,ENST00000591436



592725

458406,ENST00000558589,ENST00000558667,ENST00000559523,ENST00000559664,ENST00000560164,ENST

425146,ENST00000446737,ENST00000518291,ENST00000519681  
571451,ENST00000572272,ENST00000577119

571451,ENST00000572272,ENST00000577119

425146,ENST00000446737,ENST00000518291,ENST00000519681

458406,ENST00000558589,ENST00000558667,ENST00000559523,ENST00000559664,ENST00000560164,ENST

449052,ENST00000538115,ENST00000542585,ENST00000546292  
403642,ENST00000404276,ENST00000405598,ENST00000544772

439673,ENST00000568454

540320

449052,ENST00000538115,ENST00000542585,ENST00000546292

403642,ENST00000404276,ENST00000405598,ENST00000544772

540320

439673,ENST00000568454

361676,ENST00000397789,ENST00000403435,ENST00000403999

361676,ENST00000397789,ENST00000403435,ENST00000403999

477086,ENST00000477756,ENST00000478156,ENST00000479406,ENST00000480843

589042,ENST00000591111

403813,ENST00000414165

589042,ENST00000591111

403813,ENST00000414165

477086,ENST00000477756,ENST00000478156,ENST00000479406,ENST00000480843

533202,ENST00000533786

589042,ENST00000591111

403642,ENST00000404276,ENST00000405598,ENST00000544772

572158,ENST00000572405,ENST00000575333,ENST00000575882,ENST00000575909,ENST00000576932

402384,ENST00000406470,ENST00000407906,ENST00000422063

599577,ENST00000600833

572158,ENST00000572405,ENST00000575333,ENST00000575882,ENST00000575909,ENST00000576932

403642,ENST00000404276,ENST00000405598,ENST00000544772

533786

589042,ENST00000591111

402384,ENST00000406470,ENST00000407906,ENST00000422063

599577,ENST00000600833

469430,ENST00000483288,ENST00000485178  
544867,ENST00000545558  
449052,ENST00000538115,ENST00000542585,ENST00000546292

440709,ENST00000457250

532297  
477310,ENST00000497706,ENST00000556679  
477086,ENST00000477756,ENST00000478156,ENST00000479406,ENST00000480843



469430,ENST00000483288,ENST00000485178

456570,ENST00000477310,ENST00000556679

440709,ENST00000457250

544867,ENST00000545558

477086,ENST00000477756,ENST00000478156,ENST00000479406,ENST00000480843

532297

449052,ENST00000538115,ENST00000542585,ENST00000546292

544867,ENST00000545558

445505

477086,ENST00000477756,ENST00000478156,ENST00000479406,ENST00000480843

514453,ENST00000514546,ENST00000515492

445505

544867,ENST00000545558

477086,ENST00000477756,ENST00000478156,ENST00000479406,ENST00000480843

371141,ENST00000464640,ENST00000467096,ENST00000530122

494877

551379

425615,ENST00000500320

494877

494877

425615,ENST00000500320

551379

589378

589378

521661,ENST00000523517

598205,ENST00000599920,ENST00000601313

442759,ENST00000446759,ENST00000466548,ENST00000474663,ENST00000488699,ENST00000496045

397097,ENST00000397126,ENST00000397126,ENST00000418063,ENST00000418100,ENST00000594947,ENST

458225

404092

458225

521661,ENST00000523517



598205,ENST00000599920,ENST00000601313

442759,ENST00000446759,ENST00000466548,ENST00000474663,ENST00000488699,ENST00000496045

521661,ENST00000523517

493429

455756

369354,ENST00000369356,ENST00000369359,ENST00000526445,ENST00000528129,ENST00000530740,ENST

442759,ENST00000446759,ENST00000466548,ENST00000474663,ENST00000488699,ENST00000496045

594419,ENST00000601693

458225

455756

369354,ENST00000369356,ENST00000369359,ENST00000526445,ENST00000528129,ENST00000530740,ENST

458225

521661,ENST00000523517

493429

442759,ENST00000446759,ENST00000466548,ENST00000474663,ENST00000488699,ENST00000496045

465261,ENST00000526202

537460,ENST00000538980,ENST00000539091,ENST00000540209,ENST00000542145,ENST00000543393,ENST  
591111

453196,ENST00000476352,ENST00000530997

549027,ENST00000551601

458225

447038,ENST00000465261,ENST00000524651,ENST00000525107,ENST00000526202

458225

537460,ENST00000538980,ENST00000539091,ENST00000540209,ENST00000542145,ENST00000543393,ENST

591111

453196,ENST00000476352,ENST00000530997

549027,ENST00000551601

534214

521661,ENST00000523517

442759,ENST00000446759,ENST00000466548,ENST00000474663,ENST00000488699,ENST00000496045

519895,ENST00000520602

458225

534214

458225

521661,ENST00000523517

519895,ENST00000520602

442759,ENST00000446759,ENST00000466548,ENST00000474663,ENST00000488699,ENST00000496045

397097,ENST00000397097,ENST00000511833,ENST00000594012,ENST00000595461,ENST00000598381

399602,ENST00000429541,ENST00000526601,ENST00000594012,ENST00000595461,ENST00000598381,ENST

357491,ENST00000359735,ENST00000359973,ENST00000389534,ENST00000397136,ENST00000418063,ENST

396165,ENST00000553352,ENST00000553728,ENST00000554392,ENST00000555716,ENST00000603904

477086,ENST00000477756,ENST00000478156,ENST00000479406,ENST00000480843

520578,ENST00000522367,ENST00000522761,ENST00000523519

396165,ENST00000553352,ENST00000553728,ENST00000554392,ENST00000555716,ENST00000603904

406620,ENST00000566587

397082,ENST00000397126,ENST00000419098,ENST00000427401,ENST00000594012,ENST00000594012,ENST

598381

396165,ENST00000553352,ENST00000554392,ENST00000555716,ENST00000553728,ENST00000603904,ENST

477086,ENST00000477756,ENST00000478156,ENST00000479406,ENST00000480843

526601



520578,ENST00000522367,ENST00000522761,ENST00000523519

406620,ENST00000566587

570818,ENST00000575483

594012,ENST00000595461,ENST00000598381

600435

419098,ENST00000420713,ENST00000594012,ENST00000595461,ENST00000598381









556177

589656,ENST00000591032,ENST00000591804,ENST00000593052

477086,ENST00000477756,ENST00000478156,ENST00000479406,ENST00000480843

477086,ENST00000477756,ENST00000478156,ENST00000479406,ENST00000480843













.127709,NM\_001127710,NM\_001127710,NM\_001303232,NM\_001303232,NM\_005807,NM\_005807

.001142529,NM\_001142530,NM\_030639

.001269041,NM\_001269042,NM\_001269043,NM\_001269044,NM\_001269045,NM\_001269046,NM\_00126904









.001318795,NM\_001318796,NM\_003264  
.282390

.001014797,NM\_001161352,NM\_001161353,NM\_001271518,NM\_001271519,NM\_001322829,NM\_00132282

.014393

JM\_001322893,NM\_001322894,NM\_001322895,NM\_001322896,NM\_001322897,NM\_001322898,NM\_001322899

NM\_001322893,NM\_001322894,NM\_001322895,NM\_001322896,NM\_001322897,NM\_001322898,NM\_001322899

.321904,NM\_020532,NM\_207521

NM\_001322893,NM\_001322894,NM\_001322895,NM\_001322896,NM\_001322897,NM\_001322898,NM\_001322899

NM\_001322893,NM\_001322894,NM\_001322895,NM\_001322896,NM\_001322897,NM\_001322898,NM\_0013:

JM\_001322893,NM\_001322894,NM\_001322895,NM\_001322896,NM\_001322897,NM\_001322898,NM\_0013:  
JM\_001322893,NM\_001322894,NM\_001322895,NM\_001322896,NM\_001322897,NM\_001322898,NM\_0013:





.318832



.001300744,NM\_001300745,NM\_001318119,NM\_001318120,NM\_016211













00000357462,ENST00000358087,ENST00000358087,ENST00000358087,ENST00000358087,ENST00000358087,ENST00000358087

00000349350,ENST00000349350,ENST00000349350,ENST00000349350,ENST00000349350,ENST00000349350,ENST00000349350  
00000367483,ENST00000367483,ENST00000367483,ENST00000367484,ENST00000367484,ENST00000367484,ENST00000367484

00000518825,ENST00000518825,ENST00000518825,ENST00000518825,ENST00000518910,ENST00000518910,ENST00000518910

00000361163,ENST00000409914,ENST00000409914,ENST00000409914,ENST00000409914  
00000367485,ENST00000367485,ENST00000367485,ENST00000367485,ENST00000367486,ENST00000367486,ENST00000367486  
00000367483,ENST00000367484,ENST00000367484,ENST00000367484,ENST00000367484,ENST00000367484,ENST00000367484

`00000402615,ENST00000402615,ENST00000402615,ENST00000407796,ENST00000407796,ENST0000040779

`00000357462,ENST00000357462,ENST00000357462,ENST00000357462,ENST00000357462,ENST0000035746  
`00000360967,ENST00000360967,ENST00000360967,ENST00000360967,ENST00000360967,ENST0000036116

`00000349350,ENST00000349350,ENST00000349350,ENST00000349350,ENST00000349350,ENST0000034935  
`00000367483,ENST00000367483,ENST00000367483,ENST00000367484,ENST00000367484,ENST0000036748

`00000518825,ENST00000518825,ENST00000518825,ENST00000518825,ENST00000518910,ENST0000051891

`00000361163,ENST00000409914,ENST00000409914,ENST00000409914,ENST00000409914  
`00000360967,ENST00000360967,ENST00000360967,ENST00000360967,ENST00000360967,ENST0000036116

00000367485,ENST00000367485,ENST00000367485,ENST00000367485,ENST00000367486,ENST0000036748  
00000367483,ENST00000367484,ENST00000367484,ENST00000367484,ENST00000367484,ENST0000036748

00000368284,ENST00000368284,ENST00000368284,ENST00000368284,ENST00000368285,ENST0000036828

00000360232,ENST00000360232,ENST00000360232,ENST00000360232,ENST00000360232,ENST0000036023

00000454075,ENST00000454075,ENST00000454075,ENST00000537215,ENST00000537215,ENST0000053721

00000359221,ENST00000359221,ENST00000359221,ENST00000359221,ENST00000359221,ENST0000035922

00000341594,ENST00000341594,ENST00000341594,ENST00000341594,ENST00000341594,ENST0000035682

00000379933,ENST00000379933,ENST00000379933,ENST00000379933,ENST00000379938,ENST0000037993

00000369339,ENST00000490598,ENST00000490598,ENST00000490598,ENST00000490598,ENST0000060517

00000375400,ENST00000375400,ENST00000375400,ENST00000375400,ENST00000535393,ENST0000053539



'00000368284,ENST00000368284,ENST00000368284,ENST00000368284,ENST00000368285,ENST0000036828

'00000360232,ENST00000360232,ENST00000360232,ENST00000360232,ENST00000360232,ENST0000036023

'00000454075,ENST00000454075,ENST00000454075,ENST00000537215,ENST00000537215,ENST0000053721

'00000373631,ENST00000460253,ENST00000460253,ENST00000460253,ENST00000460253

'00000342992,ENST00000359218,ENST00000359218,ENST00000359218,ENST00000359218,ENST0000035921

'00000377400,ENST00000382447,ENST00000382447,ENST00000382447,ENST00000382447

'00000359221,ENST00000359221,ENST00000359221,ENST00000359221,ENST00000359221,ENST0000035922

'00000395435,ENST00000395435,ENST00000395435,ENST00000395435,ENST00000395435,ENST0000039543

'00000357517,ENST00000394536,ENST00000394536,ENST00000394536,ENST00000394536,ENST0000039453

'00000375400,ENST00000375400,ENST00000375400,ENST00000375400,ENST00000535393,ENST0000053539



00000360232,ENST00000360232,ENST00000360232,ENST00000360232,ENST00000360232,ENST00000360232

00000396410,ENST00000396410,ENST00000396410,ENST00000396410,ENST00000396410,ENST00000396410  
00000454075,ENST00000454075,ENST00000454075,ENST00000537215,ENST00000537215,ENST00000537215

00000359221,ENST00000359221,ENST00000359221,ENST00000359221,ENST00000359221,ENST00000359221

00000375400,ENST00000375400,ENST00000375400,ENST00000375400,ENST00000535393,ENST00000535393

'00000349350,ENST00000349350,ENST00000349350,ENST00000349350,ENST00000349350,ENST00000349350  
'00000367483,ENST00000367484,ENST00000367484,ENST00000367484,ENST00000367484,ENST00000367484

'00000375274,ENST00000375290,ENST00000375290,ENST00000375290,ENST00000375290,ENST00000375290

'00000348383,ENST00000348383,ENST00000348383,ENST00000348383,ENST00000348383,ENST0000035727



00000543479,ENST00000544770

00000431971,ENST00000441865,ENST00000448295,ENST00000457310

'00000397082,ENST00000397082,ENST00000397097,ENST00000397121,ENST00000402377,ENST0000042362

`00000353004,ENST00000354078,ENST00000354078,ENST00000354078,ENST00000354078  
`00000421160,ENST00000421160,ENST00000421160,ENST00000421160,ENST00000447444,ENST00000447444

`00000553484,ENST00000555664,ENST00000555664,ENST00000555664,ENST00000555664  
`00000409658,ENST00000436787,ENST00000436787,ENST00000436787,ENST00000436787

`00000518083,ENST00000518083,ENST00000518083,ENST00000519243,ENST00000519243,ENST00000519243

`00000376072,ENST00000376073,ENST00000376073,ENST00000376073,ENST00000376073

`00000361302,ENST00000361302,ENST00000361302,ENST00000361522,ENST00000361522,ENST00000361522

`00000480623,ENST00000538167,ENST00000538167,ENST00000538167,ENST00000538167

`00000595461,ENST00000598381,ENST00000598381,ENST00000598381,ENST00000598381  
`00000546047,ENST00000546047,ENST00000546047,ENST00000546047,ENST00000571215,ENST00000571215

`00000596534,ENST00000601023,ENST00000601023,ENST00000601023,ENST00000601023

'00000296869,ENST00000296869,ENST00000357096,ENST00000357096,ENST00000357096,ENST0000035709

'00000277551,ENST00000371355,ENST00000371355,ENST00000371355,ENST00000371355,ENST0000037135

'00000369339,ENST00000490598,ENST00000490598,ENST00000490598,ENST00000490598

'00000397082,ENST00000594012,ENST00000594012,ENST00000594012,ENST00000594012,ENST0000059546

'00000395270,ENST00000395270,ENST00000395270,ENST00000395270,ENST00000434423,ENST0000043442

'00000511604,ENST00000511604,ENST00000511604,ENST00000511604,ENST00000512055,ENST0000051205

00000397136,ENST00000397136,ENST00000397136,ENST00000397136,ENST00000437743,ENST0000043774

00000575087,ENST00000575087,ENST00000575087,ENST00000575087,ENST00000575842,ENST0000057584

00000348069,ENST00000366496,ENST00000366496,ENST00000366496,ENST00000366496,ENST0000036649

00000394067,ENST00000394067,ENST00000394067,ENST00000394067,ENST00000417856,ENST0000041785  
00000414083,ENST00000414083,ENST00000414083,ENST00000414083,ENST00000446403,ENST0000044640

00000596534,ENST00000601023,ENST00000601023,ENST00000601023,ENST00000601023  
00000399232,ENST00000399232,ENST00000399232,ENST00000399232,ENST00000426342,ENST0000042634

00000396774,ENST00000520188,ENST00000520188,ENST00000520188,ENST00000520188  
00000535545,ENST00000542951,ENST00000542951,ENST00000542951,ENST00000542951  
00000393785,ENST00000393785,ENST00000393785,ENST00000462705,ENST00000462705,ENST0000046270

00000276344,ENST00000276344,ENST00000276344,ENST00000276344,ENST00000360243,ENST0000036024  
00000398548,ENST00000398548,ENST00000398548,ENST00000422911,ENST00000422911,ENST0000042291

00000378615,ENST00000378615,ENST00000378615,ENST00000378618,ENST00000378618,ENST0000037861

00000390003,ENST00000390003,ENST00000390003,ENST00000402934,ENST00000402934,ENST0000040293

00000596534,ENST00000601023,ENST00000601023,ENST00000601023,ENST00000601023



00000429348,ENST00000429348,ENST00000429348,ENST00000432264,ENST00000432264,ENST0000043226  
00000415165,ENST00000415165,ENST00000415165,ENST00000415165,ENST00000441319,ENST0000044131

00000585941,ENST00000592690,ENST00000592690,ENST00000592690,ENST00000592690

00000359597,ENST00000359597,ENST00000359597,ENST00000359597,ENST00000359597,ENST0000041346

00000354228,ENST00000354228,ENST00000354228,ENST00000354228,ENST00000354228,ENST0000035441

00000553484,ENST00000555664,ENST00000555664,ENST00000555664,ENST00000555664

00000348028,ENST00000348028,ENST00000348028,ENST00000348028,ENST00000348028,ENST0000034802

00000349350,ENST00000349350,ENST00000349350,ENST00000349350,ENST00000349350,ENST0000034935

'00000543479,ENST00000544770

`00000353004,ENST00000354078,ENST00000354078,ENST00000354078,ENST00000354078  
`00000395477,ENST00000427277,ENST00000427277,ENST00000427277,ENST00000427277

`00000506583,ENST00000513129,ENST00000513129,ENST00000513129,ENST00000513129

`00000518083,ENST00000518083,ENST00000518083,ENST00000519243,ENST00000519243,ENST0000051924

`00000361302,ENST00000361302,ENST00000361302,ENST00000361522,ENST00000361522,ENST0000036152

`00000359524,ENST00000359524,ENST00000359524,ENST00000371432,ENST00000371432,ENST0000037143

`00000296869,ENST00000296869,ENST00000357096,ENST00000357096,ENST00000357096,ENST0000035709

`00000528372,ENST00000544249,ENST00000544249,ENST00000544249,ENST00000544249

`00000541407,ENST00000542638,ENST00000542638,ENST00000542638,ENST00000542638

'00000359597,ENST00000359597,ENST00000359597,ENST00000359597,ENST00000359597,ENST0000041346

'00000590550,ENST00000592012,ENST00000592012,ENST00000592012,ENST00000592012

'00000543479,ENST00000544770

'00000353004,ENST00000354078,ENST00000354078,ENST00000354078,ENST00000354078  
'00000395477,ENST00000427277,ENST00000427277,ENST00000427277,ENST00000427277

'00000518083,ENST00000518083,ENST00000518083,ENST00000519243,ENST00000519243,ENST0000051924

`00000361302,ENST00000361302,ENST00000361302,ENST00000361522,ENST00000361522,ENST0000036152

`00000359524,ENST00000359524,ENST00000359524,ENST00000371432,ENST00000371432,ENST0000037143

`00000296869,ENST00000296869,ENST00000357096,ENST00000357096,ENST00000357096,ENST0000035709

`00000541407,ENST00000542638,ENST00000542638,ENST00000542638,ENST00000542638

`00000355813,ENST00000538690,ENST00000538690,ENST00000538690,ENST00000538690

`00000359597,ENST00000359597,ENST00000359597,ENST00000359597,ENST00000359597,ENST0000041346

`00000367485,ENST00000367485,ENST00000367485,ENST00000367485,ENST00000367486,ENST0000036748

'00000429192,ENST00000438880,ENST00000438906,ENST00000442310,ENST00000445912

'00000543479,ENST00000544770

00000353004,ENST00000354078,ENST00000354078,ENST00000354078,ENST00000354078

00000252034,ENST00000252034,ENST00000252034,ENST00000252034,ENST00000252034,ENST0000032039  
00000518083,ENST00000518083,ENST00000518083,ENST00000519243,ENST00000519243,ENST0000051924  
00000433283,ENST00000441750,ENST00000441750,ENST00000441750,ENST00000441750

00000361302,ENST00000361302,ENST00000361302,ENST00000361522,ENST00000361522,ENST0000036152  
00000569798

00000359524,ENST00000359524,ENST00000359524,ENST00000371432,ENST00000371432,ENST0000037143

00000296869,ENST00000296869,ENST00000357096,ENST00000357096,ENST00000357096,ENST0000035709



`00000371489,ENST00000371489,ENST00000371489,ENST00000371489,ENST00000371501,ENST0000037150

`00000541407,ENST00000542638,ENST00000542638,ENST00000542638,ENST00000542638

`00000348806,ENST00000348806,ENST00000348806,ENST00000348806,ENST00000348806,ENST0000036013  
`00000383807,ENST00000419585,ENST00000419585,ENST00000419585,ENST00000419585

`00000277551,ENST00000277551,ENST00000277551,ENST00000277551,ENST00000277551,ENST0000037135

`00000375401,ENST00000375401,ENST00000375401,ENST00000375401,ENST00000404049,ENST0000040404

`00000382194,ENST00000382203,ENST00000382203,ENST00000382203,ENST00000382203  
`00000359597,ENST00000359597,ENST00000359597,ENST00000359597,ENST00000359597,ENST0000041346

`00000409270,ENST00000448409,ENST00000448409,ENST00000448409,ENST00000448409

`00000339570,ENST00000339570,ENST00000339570,ENST00000339570,ENST00000339570,ENST0000037678

`00000567188,ENST00000569240,ENST00000569240,ENST00000569240,ENST00000569240

`00000441566,ENST00000449981,ENST00000449981,ENST00000449981,ENST00000449981

`00000354386,ENST00000354386,ENST00000354386,ENST00000423743,ENST00000423743,ENST0000042374

`00000393330,ENST00000393330,ENST00000393330,ENST00000393330,ENST00000393330,ENST0000054656

`00000382874,ENST00000382881,ENST00000382881,ENST00000382881,ENST00000382881

`00000517361,ENST00000520492,ENST00000520492,ENST00000520492,ENST00000520492

`00000546244,ENST00000546244,ENST00000546244,ENST00000546244,ENST00000550165,ENST0000055016

`00000356436,ENST00000356436,ENST00000356436,ENST00000379300,ENST00000379300,ENST00000379300

`00000519139,ENST00000519139,ENST00000519139,ENST00000519148,ENST00000519148,ENST00000519148

`00000358338,ENST00000358338,ENST00000358338,ENST00000360108,ENST00000360108,ENST00000360108





'00000608903,ENST00000609232

'00000434061,ENST00000435046,ENST00000441154







0000608903,ENST0000609232







00000434061,ENST00000435046,ENST00000441154













00000555309,ENST00000555883,ENST00000555914,ENST00000556628,ENST00000556897,ENST0000055715

'0000055309,ENST00000555883,ENST00000555914,ENST00000556628,ENST00000556897,ENST0000055715



00000463781,ENST00000466475,ENST00000470451,ENST00000475231,ENST00000477086,ENST0000047775

00000421100,ENST00000427578,ENST00000443370,ENST00000449052,ENST00000538115,ENST0000054258





'00000521978,ENST00000522291,ENST00000523963

'00000521978,ENST00000522291,ENST00000523963



00000514333,ENST00000514677,ENST00000514891

00000514333,ENST00000514677,ENST00000514891

00000514333,ENST00000514677,ENST00000514891

'00000514333,ENST00000514677,ENST00000514891

00000433728,ENST00000439200,ENST00000447421,ENST00000448511







00000545390

00000565481

00000545390

00000417045,ENST00000433722,ENST00000537108

'00000565481

'00000545390

00000540326,ENST00000545174,ENST00000546191

00000545390

00000540326,ENST00000545174,ENST00000546191











00000531164

'00000531164









'00000560332,ENST00000560611,ENST00000561080,ENST00000561120



00000560332,ENST00000560611,ENST00000561080,ENST00000561120

























'00000601693



'00000530822,ENST00000531369,ENST00000534536

'00000530822,ENST00000531369,ENST00000534536



00000543697

'00000543697



0000601440

0000426391,ENST00000437743,ENST00000440155,ENST00000456783,ENST00000589717,ENST0000059429

00000594012,ENST00000595461,ENST00000595461,ENST00000595461,ENST00000598381,ENST0000059838

00000280083,ENST00000341502,ENST00000341749,ENST00000348007,ENST00000396158,ENST0000039616































47,NM\_001269048,NM\_001269051,NM\_001269052,NM\_080618











30,NM\_001322832,NM\_001322835,NM\_001322836,NM\_001322837,NM\_001322838,NM\_002247

22899,NM\_001322900,NM\_002313,NM\_006720,NM\_001003407,NM\_001003408,NM\_001322882,NM\_00132

22899,NM\_001322900,NM\_002313,NM\_006720

22899,NM\_001322900,NM\_002313,NM\_006720,NM\_001003407,NM\_001003408,NM\_001322882,NM\_00132

22899,NM\_001322900,NM\_002313,NM\_006720

22899,NM\_001322900,NM\_002313,NM\_006720,NM\_001003407,NM\_001003408,NM\_001322882,NM\_001322883,NM\_001322884,NM\_001322885,NM\_001322886,NM\_001322887,NM\_001322888,NM\_001322889,NM\_001322890,NM\_001322891,NM\_001322892,NM\_001322893,NM\_001322894,NM\_001322895,NM\_001322896,NM\_001322897,NM\_001322898,NM\_001322899,NM\_001322900,NM\_002313,NM\_006720,NM\_001003407,NM\_001003408,NM\_001322882,NM\_001322883,NM\_001322884,NM\_001322885,NM\_001322886,NM\_001322887,NM\_001322888,NM\_001322889,NM\_001322890,NM\_001322891,NM\_001322892,NM\_001322893,NM\_001322894,NM\_001322895,NM\_001322896,NM\_001322897,NM\_001322898,NM\_001322899,NM\_001322900,NM\_002313,NM\_006720





















7,ENST00000358087,ENST00000360967,ENST00000360967,ENST00000360967,ENST00000360967,ENST00000360967,ENST00000

0,ENST00000349350,ENST00000421100,ENST00000421100,ENST00000421100,ENST00000421100,ENST00000421100,ENST000004  
4,ENST00000367484,ENST00000367484,ENST00000367484,ENST00000367484,ENST00000367485,ENST00000367485,ENST00000

0,ENST00000518910,ENST00000518910,ENST00000518910,ENST00000520158,ENST00000520158,ENST00000520158,ENST00000

6,ENST00000367486,ENST00000367486,ENST00000367486,ENST00000445192,ENST00000445192,ENST00000445192,ENST00000  
4,ENST00000367484,ENST00000367485,ENST00000367485,ENST00000367485,ENST00000367485,ENST00000367485,ENST00000



6,ENST00000407796,ENST00000407796,ENST00000407796,ENST00000407796,ENST00000554581,ENST00000

2,ENST00000357462,ENST00000358087,ENST00000358087,ENST00000358087,ENST00000358087,ENST00000  
3,ENST00000361163,ENST00000361163,ENST00000361163,ENST00000361163,ENST00000361163,ENST00000

0,ENST00000349350,ENST00000421100,ENST00000421100,ENST00000421100,ENST00000421100,ENST00000  
4,ENST00000367484,ENST00000367484,ENST00000367484,ENST00000367484,ENST00000367485,ENST00000

0,ENST00000518910,ENST00000518910,ENST00000518910,ENST00000520158,ENST00000520158,ENST00000

3,ENST00000361163,ENST00000361163,ENST00000361163,ENST00000361163,ENST00000361163,ENST00000

6,ENST00000367486,ENST00000367486,ENST00000367486,ENST00000445192,ENST00000445192,ENST00000  
4,ENST00000367484,ENST00000367485,ENST00000367485,ENST00000367485,ENST00000367485,ENST00000

5,ENST00000368285,ENST00000368285,ENST00000368285,ENST00000368286,ENST00000368286,ENST00000  
2,ENST00000360232,ENST00000360232,ENST00000360232,ENST00000390668,ENST00000390668,ENST00000

5,ENST00000537215,ENST00000537215,ENST00000537215,ENST00000537215,ENST00000538913,ENST00000

1,ENST00000359221,ENST00000359221,ENST00000359221,ENST00000361569,ENST00000361569,ENST00000

0,ENST00000356820,ENST00000356820,ENST00000356820,ENST00000356820,ENST00000356820,ENST00000

8,ENST00000379938,ENST00000379938,ENST00000379938,ENST00000483150,ENST00000483150,ENST00000  
6,ENST00000605176,ENST00000605176,ENST00000605176

3,ENST00000535393,ENST00000535393,ENST00000535393,ENST00000538146,ENST00000538146,ENST00000



5,ENST00000368285,ENST00000368285,ENST00000368285,ENST00000368286,ENST00000368286,ENST00000

2,ENST00000360232,ENST00000360232,ENST00000360232,ENST00000390668,ENST00000390668,ENST00000

5,ENST00000537215,ENST00000537215,ENST00000537215,ENST00000537215,ENST00000538913,ENST00000

8,ENST00000359218,ENST00000460472,ENST00000460472,ENST00000460472,ENST00000460472,ENST00000

1,ENST00000359221,ENST00000359221,ENST00000359221,ENST00000361569,ENST00000361569,ENST00000

6,ENST00000395436,ENST00000395436,ENST00000395436,ENST00000395436,ENST00000395436,ENST00000

6,ENST00000394536,ENST00000456271,ENST00000456271,ENST00000456271,ENST00000456271,ENST00000  
3,ENST00000535393,ENST00000535393,ENST00000535393,ENST00000538146,ENST00000538146,ENST00000

2,ENST00000360232,ENST00000360232,ENST00000360232,ENST00000390668,ENST00000390668,ENST00000

0,ENST00000396410,ENST00000447912,ENST00000447912,ENST00000447912,ENST00000447912,ENST00000  
5,ENST00000537215,ENST00000537215,ENST00000537215,ENST00000537215,ENST00000538913,ENST00000

1,ENST00000359221,ENST00000359221,ENST00000359221,ENST00000361569,ENST00000361569,ENST00000

3,ENST00000535393,ENST00000535393,ENST00000535393,ENST00000538146,ENST00000538146,ENST00000

0,ENST00000349350,ENST00000421100,ENST00000421100,ENST00000421100,ENST00000421100,ENST00000421100,ENST000004,ENST00000367484,ENST00000367485,ENST00000367485,ENST00000367485,ENST00000367485,ENST00000367485,ENST00000

0,ENST00000375290,ENST00000430669,ENST00000430669,ENST00000430669,ENST00000430669,ENST00000430669,ENST00000

2,ENST00000357272,ENST00000357272,ENST00000357272,ENST00000357272,ENST00000357272,ENST00000357272,ENST00000







7,ENST00000596143,ENST00000600435

4,ENST00000447444,ENST00000447444,ENST00000447444,ENST00000541401,ENST00000541401,ENST00000

3,ENST00000519243,ENST00000519243,ENST00000519243,ENST00000519243,ENST00000520871,ENST00000

2,ENST00000361522,ENST00000361522,ENST00000361522,ENST00000361522,ENST00000361915,ENST00000

5,ENST00000571215,ENST00000571215,ENST00000571215,ENST00000572725,ENST00000572725,ENST00000

6,ENST00000357096,ENST00000357096,ENST00000357096,ENST00000357096,ENST00000357096,ENST00000

5,ENST00000371355,ENST00000371357,ENST00000371357,ENST00000371357,ENST00000371357,ENST00000

1,ENST00000595461,ENST00000595461,ENST00000595461,ENST00000598381,ENST00000598381,ENST00000

3,ENST00000434423,ENST00000434423,ENST00000434423,ENST00000446813,ENST00000446813,ENST00000

5,ENST00000512055,ENST00000512055,ENST00000512055,ENST00000512332,ENST00000512332,ENST00000

3,ENST00000437743,ENST00000437743,ENST00000437743,ENST00000440155,ENST00000440155,ENST00000

2,ENST00000575842,ENST00000575842,ENST00000575842,ENST00000576544,ENST00000576544,ENST00000

6,ENST00000366496,ENST00000366497,ENST00000366497,ENST00000366497,ENST00000366497,ENST00000

6,ENST00000417856,ENST00000417856,ENST00000417856,ENST00000421552,ENST00000421552,ENST00000  
3,ENST00000446403,ENST00000446403,ENST00000446403,ENST00000453407,ENST00000453407,ENST00000

2,ENST00000426342,ENST00000426342,ENST00000426342,ENST00000439988,ENST00000439988,ENST00000

5,ENST00000462705,ENST00000462705,ENST00000462705,ENST00000462705,ENST00000464560,ENST00000

3,ENST00000360243,ENST00000360243,ENST00000360243,ENST00000360243,ENST00000360243,ENST00000  
1,ENST00000422911,ENST00000422911,ENST00000422911,ENST00000422911,ENST00000433067,ENST00000

8,ENST00000378618,ENST00000378618,ENST00000378618,ENST00000378618,ENST00000395460,ENST00000

4,ENST00000402934,ENST00000402934,ENST00000402934,ENST00000402934,ENST00000404525,ENST00000

4,ENST00000432264,ENST00000432264,ENST00000432264,ENST00000432264,ENST00000447116,ENST00000  
9,ENST00000441319,ENST00000441319,ENST00000441319,ENST00000509063,ENST00000509063,ENST00000

5,ENST00000413465,ENST00000413465,ENST00000413465,ENST00000413465,ENST00000413465,ENST00000

6,ENST00000354416,ENST00000354416,ENST00000354416,ENST00000354416,ENST00000354416,ENST00000

8,ENST00000348028,ENST00000349350,ENST00000349350,ENST00000349350,ENST00000349350,ENST00000

0,ENST00000349350,ENST00000421100,ENST00000421100,ENST00000421100,ENST00000421100,ENST00000





3,ENST00000519243,ENST00000519243,ENST00000519243,ENST00000519243,ENST00000520871,ENST00000

2,ENST00000361522,ENST00000361522,ENST00000361522,ENST00000361522,ENST00000361915,ENST00000

2,ENST00000371432,ENST00000371432,ENST00000371432,ENST00000371432,ENST00000371436,ENST00000

6,ENST00000357096,ENST00000357096,ENST00000357096,ENST00000357096,ENST00000357096,ENST00000

5,ENST00000413465,ENST00000413465,ENST00000413465,ENST00000413465,ENST00000413465,ENST00000

3,ENST00000519243,ENST00000519243,ENST00000519243,ENST00000519243,ENST00000520871,ENST00000

2,ENST00000361522,ENST00000361522,ENST00000361522,ENST00000361522,ENST00000361915,ENST00000

2,ENST00000371432,ENST00000371432,ENST00000371432,ENST00000371432,ENST00000371436,ENST00000

6,ENST00000357096,ENST00000357096,ENST00000357096,ENST00000357096,ENST00000357096,ENST00000

5,ENST00000413465,ENST00000413465,ENST00000413465,ENST00000413465,ENST00000413465,ENST00000

6,ENST00000367486,ENST00000367486,ENST00000367486,ENST00000445192,ENST00000445192,ENST00000



9,ENST00000320399,ENST00000320399,ENST00000320399,ENST00000320399,ENST00000320399,ENST000003,ENST00000519243,ENST00000519243,ENST00000519243,ENST00000519243,ENST00000520871,ENST00000

2,ENST00000361522,ENST00000361522,ENST00000361522,ENST00000361522,ENST00000361915,ENST00000

2,ENST00000371432,ENST00000371432,ENST00000371432,ENST00000371432,ENST00000371436,ENST00000

6,ENST00000357096,ENST00000357096,ENST00000357096,ENST00000357096,ENST00000357096,ENST00000

1,ENST00000371501,ENST00000371501,ENST00000371501,ENST00000371502,ENST00000371502,ENST00000

5,ENST00000360135,ENST00000360135,ENST00000360135,ENST00000360135,ENST00000360135,ENST00000

5,ENST00000371355,ENST00000371355,ENST00000371355,ENST00000371355,ENST00000371355,ENST00000

9,ENST00000404049,ENST00000404049,ENST00000404049,ENST00000452825,ENST00000452825,ENST00000

5,ENST00000413465,ENST00000413465,ENST00000413465,ENST00000413465,ENST00000413465,ENST00000

8,ENST00000376788,ENST00000376788,ENST00000376788,ENST00000376788,ENST00000376788,ENST00000

3,ENST00000423743,ENST00000423743,ENST00000423743,ENST00000423743,ENST00000554463,ENST00000

1,ENST00000546561,ENST00000546561,ENST00000546561,ENST00000546561,ENST00000546561,ENST00000

5,ENST00000550165,ENST00000550165,ENST00000550165,ENST00000551598,ENST00000551598,ENST00000



0,ENST00000379300,ENST00000379300,ENST00000379300,ENST00000379300,ENST00000379307,ENST00000

8,ENST00000519148,ENST00000519148,ENST00000519148,ENST00000519148,ENST00000519591,ENST00000

8,ENST00000360108,ENST00000360108,ENST00000360108,ENST00000360108,ENST00000367567,ENST00000





































7,ENST00000557201





6,ENST00000478156,ENST00000479406,ENST00000480843

5,ENST00000546292





































































































5,ENST00000601693,ENST00000601693

1,ENST00000598381,ENST00000601440,ENST00000601693

5,ENST00000553352,ENST00000554392,ENST00000555716,ENST00000553728,ENST00000603904











































2883,NM\_001322884,NM\_001322885,NM\_001322886,NM\_001322887,NM\_001322888,NM\_001322889,NM





2883,NM\_001322884,NM\_001322885,NM\_001322886,NM\_001322887,NM\_001322888,NM\_001322889,NM



2883,NM\_001322884,NM\_001322885,NM\_001322886,NM\_001322887,NM\_001322888,NM\_001322889,NM





















360967,ENST00000360967,ENST00000361163,ENST00000361163,ENST00000361163,ENST00000361163,ENST

421100,ENST00000421100,ENST00000421100,ENST00000421100,ENST00000421100,ENST00000427578,ENST  
367485,ENST00000367485,ENST00000367485,ENST00000367485,ENST00000367485,ENST00000367485,ENST

520158,ENST00000520158,ENST00000520158

445192,ENST00000445192,ENST00000445192  
367485,ENST00000367485,ENST00000367486,ENST00000367486,ENST00000367486,ENST00000367486,ENST

0554581,ENST00000554581,ENST00000554581,ENST00000554581,ENST00000554581,ENST00000554581,ENST

0358087,ENST00000358087,ENST00000360967,ENST00000360967,ENST00000360967,ENST00000360967,ENST  
0361163,ENST00000361163,ENST00000409914,ENST00000409914,ENST00000409914,ENST00000409914,ENST

0421100,ENST00000421100,ENST00000421100,ENST00000421100,ENST00000421100,ENST00000427578,ENST  
0367485,ENST00000367485,ENST00000367485,ENST00000367485,ENST00000367485,ENST00000367485,ENST

0520158,ENST00000520158,ENST00000520158

0361163,ENST00000361163,ENST00000409914,ENST00000409914,ENST00000409914,ENST00000409914,ENST

0445192,ENST00000445192,ENST00000445192

0367485,ENST00000367485,ENST00000367486,ENST00000367486,ENST00000367486,ENST00000367486,ENST



1368286,ENST00000368286,ENST00000368286

1390668,ENST00000390668,ENST00000390668,ENST00000390668,ENST00000390668,ENST00000390668,ENST

1538913,ENST00000538913,ENST00000538913,ENST00000538913,ENST00000538913,ENST00000538913,ENST

1361569,ENST00000361569,ENST00000361569,ENST00000361569,ENST00000361569,ENST00000361569,ENST

1356820,ENST00000356820,ENST00000367255,ENST00000367255,ENST00000367255,ENST00000367255,ENST

1483150,ENST00000483150,ENST00000483150

1538146,ENST00000538146,ENST00000538146



1368286,ENST00000368286,ENST00000368286

1390668,ENST00000390668,ENST00000390668,ENST00000390668,ENST00000390668,ENST00000390668,ENST

1538913,ENST00000538913,ENST00000538913,ENST00000538913,ENST00000538913,ENST00000538913,ENST

1460472,ENST00000460472,ENST00000589042,ENST00000589042,ENST00000589042,ENST00000589042,ENST

361569,ENST00000361569,ENST00000361569,ENST00000361569,ENST00000361569,ENST00000361569,ENST

395436,ENST00000395436,ENST00000413756,ENST00000413756,ENST00000413756,ENST00000413756,ENST

456271,ENST00000456271,ENST00000503492,ENST00000503492,ENST00000503492,ENST00000503492,ENST  
538146,ENST00000538146,ENST00000538146

1390668,ENST00000390668,ENST00000390668,ENST00000390668,ENST00000390668,ENST00000390668,ENST

1447912,ENST00000447912,ENST00000447912,ENST00000447912,ENST00000447912,ENST00000450288,ENST  
1538913,ENST00000538913,ENST00000538913,ENST00000538913,ENST00000538913,ENST00000538913,ENST

1361569,ENST00000361569,ENST00000361569,ENST00000361569,ENST00000361569,ENST00000361569,ENST

1538146,ENST00000538146,ENST00000538146

1421100,ENST00000421100,ENST00000421100,ENST00000421100,ENST00000421100,ENST00000427578,ENST  
1367485,ENST00000367485,ENST00000367486,ENST00000367486,ENST00000367486,ENST00000367486,ENST

1430669,ENST00000430669,ENST00000437951,ENST00000437951,ENST00000437951,ENST00000437951,ENST

1357272,ENST00000357272,ENST00000358537,ENST00000358537,ENST00000358537,ENST00000358537,ENST









0541401,ENST00000541401,ENST00000541401

0520871,ENST00000520871,ENST00000520871,ENST00000520871,ENST00000520871,ENST00000520871,ENST

0361915,ENST00000361915,ENST00000361915,ENST00000361915,ENST00000361915,ENST00000361915,ENST

0572725,ENST00000572725,ENST00000572725

1357096,ENST00000357096,ENST00000357096,ENST00000357096,ENST00000379240,ENST00000379240,ENST

1371357,ENST00000371357,ENST00000371363,ENST00000371363,ENST00000371363,ENST00000371363,ENST

1598381,ENST00000598381

1446813,ENST00000446813,ENST00000446813

1512332,ENST00000512332,ENST00000512332

1440155,ENST00000440155,ENST00000440155

1576544,ENST00000576544,ENST00000576544

1366497,ENST00000366497,ENST00000391827,ENST00000391827,ENST00000391827,ENST00000391827,ENST

1421552,ENST00000421552,ENST00000421552

1453407,ENST00000453407,ENST00000453407

1439988,ENST00000439988,ENST00000439988

1464560,ENST00000464560,ENST00000464560,ENST00000464560,ENST00000464560,ENST00000464560,ENST

1360243,ENST00000360243,ENST00000360243,ENST00000360243,ENST00000360243,ENST00000360243,ENST

1433067,ENST00000433067,ENST00000433067,ENST00000433067,ENST00000433067,ENST00000433067,ENST

1395460,ENST00000395460,ENST00000395460,ENST00000395460,ENST00000395460,ENST00000395460,ENST

1404525,ENST00000404525,ENST00000404525,ENST00000404525,ENST00000404525,ENST00000404525,ENST

447116,ENST00000447116,ENST00000447116,ENST00000447116,ENST00000447116,ENST00000447116,ENST  
509063,ENST00000509063,ENST00000509063

413465,ENST00000413465,ENST00000420246,ENST00000420246,ENST00000420246,ENST00000420246,ENST

354416,ENST00000354416,ENST00000360156,ENST00000360156,ENST00000360156,ENST00000360156,ENST

349350,ENST00000349350,ENST00000349350,ENST00000349350,ENST00000349350,ENST00000349350,ENST

421100,ENST00000421100,ENST00000421100,ENST00000421100,ENST00000421100,ENST00000427578,ENST



520871,ENST00000520871,ENST00000520871,ENST00000520871,ENST00000520871,ENST00000520871,ENST

361915,ENST00000361915,ENST00000361915,ENST00000361915,ENST00000361915,ENST00000361915,ENST

371436,ENST00000371436,ENST00000371436,ENST00000371436,ENST00000371436,ENST00000371436,ENST

357096,ENST00000357096,ENST00000357096,ENST00000357096,ENST00000379240,ENST00000379240,ENST

1413465,ENST00000413465,ENST00000420246,ENST00000420246,ENST00000420246,ENST00000420246,ENST



520871,ENST00000520871,ENST00000520871,ENST00000520871,ENST00000520871,ENST00000520871,ENST

1361915,ENST00000361915,ENST00000361915,ENST00000361915,ENST00000361915,ENST00000361915,ENST

1371436,ENST00000371436,ENST00000371436,ENST00000371436,ENST00000371436,ENST00000371436,ENST

1357096,ENST00000357096,ENST00000357096,ENST00000357096,ENST00000379240,ENST00000379240,ENST

1413465,ENST00000413465,ENST00000420246,ENST00000420246,ENST00000420246,ENST00000420246,ENST

1445192,ENST00000445192,ENST00000445192



1320399,ENST00000320399,ENST00000320399,ENST00000320399,ENST00000320399,ENST00000320399,ENST  
1520871,ENST00000520871,ENST00000520871,ENST00000520871,ENST00000520871,ENST00000520871,ENST

1361915,ENST00000361915,ENST00000361915,ENST00000361915,ENST00000361915,ENST00000361915,ENST

1371436,ENST00000371436,ENST00000371436,ENST00000371436,ENST00000371436,ENST00000371436,ENST

1357096,ENST00000357096,ENST00000357096,ENST00000357096,ENST00000379240,ENST00000379240,ENST

1371502,ENST00000371502,ENST00000371502

1360135,ENST00000360135,ENST00000360301,ENST00000360301,ENST00000360301,ENST00000360301,ENST

1371355,ENST00000371355,ENST00000371357,ENST00000371357,ENST00000371357,ENST00000371357,ENST

1452825,ENST00000452825,ENST00000452825

1413465,ENST00000413465,ENST00000420246,ENST00000420246,ENST00000420246,ENST00000420246,ENST

1376788,ENST00000376788,ENST00000415380,ENST00000415380,ENST00000415380,ENST00000415380,ENST

1554463,ENST00000554463,ENST00000554463,ENST00000554463,ENST00000554463,ENST00000554463,ENST

1546561,ENST00000546561,ENST00000552128,ENST00000552128,ENST00000552128,ENST00000552128,ENST

1551598,ENST00000551598,ENST00000551598

1379307,ENST00000379307,ENST00000379307,ENST00000379307,ENST00000379307,ENST00000379307,ENST

1519591,ENST00000519591,ENST00000519591,ENST00000519591,ENST00000519591,ENST00000519591,ENST

1367567,ENST00000367567,ENST00000367567,ENST00000367567,ENST00000367567,ENST00000367567,ENST



































































































































































































I\_001322890,NM\_001322891,NM\_001322892,NM\_001322893,NM\_001322894,NM\_001322895,NM\_001322896



I\_001322890,NM\_001322891,NM\_001322892,NM\_001322893,NM\_001322894,NM\_001322895,NM\_001322896,NM\_001322897,NM\_001322898,NM\_001322899,NM\_001322900,NM\_001322901,NM\_001322902,NM\_001322903,NM\_001322904,NM\_001322905,NM\_001322906,NM\_001322907,NM\_001322908,NM\_001322909,NM\_001322910,NM\_001322911,NM\_001322912,NM\_001322913,NM\_001322914,NM\_001322915,NM\_001322916,NM\_001322917,NM\_001322918,NM\_001322919,NM\_001322920,NM\_001322921,NM\_001322922,NM\_001322923,NM\_001322924,NM\_001322925,NM\_001322926,NM\_001322927,NM\_001322928,NM\_001322929,NM\_001322930,NM\_001322931,NM\_001322932,NM\_001322933,NM\_001322934,NM\_001322935,NM\_001322936,NM\_001322937,NM\_001322938,NM\_001322939,NM\_001322940,NM\_001322941,NM\_001322942,NM\_001322943,NM\_001322944,NM\_001322945,NM\_001322946,NM\_001322947,NM\_001322948,NM\_001322949,NM\_001322950,NM\_001322951,NM\_001322952,NM\_001322953,NM\_001322954,NM\_001322955,NM\_001322956,NM\_001322957,NM\_001322958,NM\_001322959,NM\_001322960,NM\_001322961,NM\_001322962,NM\_001322963,NM\_001322964,NM\_001322965,NM\_001322966,NM\_001322967,NM\_001322968,NM\_001322969,NM\_001322970,NM\_001322971,NM\_001322972,NM\_001322973,NM\_001322974,NM\_001322975,NM\_001322976,NM\_001322977,NM\_001322978,NM\_001322979,NM\_001322980,NM\_001322981,NM\_001322982,NM\_001322983,NM\_001322984,NM\_001322985,NM\_001322986,NM\_001322987,NM\_001322988,NM\_001322989,NM\_001322990,NM\_001322991,NM\_001322992,NM\_001322993,NM\_001322994,NM\_001322995,NM\_001322996,NM\_001322997,NM\_001322998,NM\_001322999,NM\_001323000



























T00000361163,ENST00000361163,ENST00000409914,ENST00000409914,ENST00000409914,ENST0000040991

T00000427578,ENST00000427578,ENST00000427578,ENST00000427578,ENST00000427578,ENST0000042757  
T00000367486,ENST00000367486,ENST00000367486,ENST00000367486,ENST00000367486,ENST0000036748

T00000367486,ENST00000367486,ENST00000445192,ENST00000445192,ENST00000445192,ENST0000044519

T00000554848,ENST00000554848,ENST00000554848,ENST00000554848,ENST00000554848,ENST00000554848

T00000360967,ENST00000360967,ENST00000360967,ENST00000360967,ENST00000360967,ENST00000360967  
T00000409914,ENST00000409914,ENST00000409914,ENST00000409914,ENST00000409914

T00000427578,ENST00000427578,ENST00000427578,ENST00000427578,ENST00000427578,ENST00000427578  
T00000367486,ENST00000367486,ENST00000367486,ENST00000367486,ENST00000367486,ENST00000367486

T00000409914,ENST00000409914,ENST00000409914,ENST00000409914,ENST00000409914

T00000367486,ENST00000367486,ENST00000445192,ENST00000445192,ENST00000445192,ENST00000445192,ENST00000445192

T00000390668,ENST00000390668,ENST00000393489,ENST00000393489,ENST00000393489,ENST00000393489

T00000543873,ENST00000543873,ENST00000543873,ENST00000543873,ENST00000543873,ENST00000543873

T00000361569,ENST00000361569,ENST00000395161,ENST00000395161,ENST00000395161,ENST00000395161

T00000367255,ENST00000367255,ENST00000367255,ENST00000367255,ENST00000423061,ENST00000423061





T00000390668,ENST00000390668,ENST00000393489,ENST00000393489,ENST00000393489,ENST00000393489,ENST00000393489

T00000543873,ENST00000543873,ENST00000543873,ENST00000543873,ENST00000543873,ENST00000543873,ENST00000543873

T00000589042,ENST00000589042,ENST00000591111,ENST00000591111,ENST00000591111,ENST00000591111,ENST00000591111

T00000361569,ENST00000361569,ENST00000395161,ENST00000395161,ENST00000395161,ENST00000395161

T00000413756,ENST00000413756,ENST00000413756,ENST00000413756,ENST00000413952,ENST00000413952

T00000503492,ENST00000503492,ENST00000536585,ENST00000536585,ENST00000536585,ENST00000536585

T00000390668,ENST00000390668,ENST00000393489,ENST00000393489,ENST00000393489,ENST00000393489,ENST00000393489

T00000450288,ENST00000450288,ENST00000450288,ENST00000450288,ENST00000450288,ENST00000450288,ENST00000450288  
T00000543873,ENST00000543873,ENST00000543873,ENST00000543873,ENST00000543873,ENST00000543873,ENST00000543873

T00000361569,ENST00000361569,ENST00000395161,ENST00000395161,ENST00000395161,ENST00000395161,ENST00000395161

T00000427578,ENST00000427578,ENST00000427578,ENST00000427578,ENST00000427578,ENST0000042757  
T00000367486,ENST00000367486,ENST00000445192,ENST00000445192,ENST00000445192,ENST0000044519

T00000437951,ENST00000437951,ENST00000468211,ENST00000468211,ENST00000468211,ENST0000046821

T00000358537,ENST00000358537,ENST00000358537,ENST00000358537,ENST00000419752,ENST0000041975







T00000523833,ENST00000523833,ENST00000523833,ENST00000523833,ENST00000523833,ENST00000523833,ENST00000523833

T00000370161,ENST00000370161,ENST00000370161,ENST00000370161,ENST00000370161,ENST00000370161,ENST00000370161



T00000379240,ENST00000379240,ENST00000379240,ENST00000379240,ENST00000379240,ENST0000037924

T00000371363,ENST00000371363,ENST00000371372,ENST00000371372,ENST00000371372,ENST0000037137

T00000391827,ENST00000391827,ENST00000391828,ENST00000391828,ENST00000391828,ENST0000039182

T00000471418,ENST00000471418,ENST00000471418,ENST00000471418,ENST00000471418,ENST0000047141

T00000360243,ENST00000360243,ENST00000370335,ENST00000370335,ENST00000370335,ENST0000037033  
T00000447016,ENST00000447016,ENST00000447016,ENST00000447016,ENST00000447016,ENST0000044701

T00000526827,ENST00000526827,ENST00000526827,ENST00000526827,ENST00000526827,ENST0000052682

T00000404816,ENST00000404816,ENST00000404816,ENST00000404816,ENST00000404816,ENST0000040481

T00000456778,ENST00000456778,ENST00000456778,ENST00000456778,ENST00000456778,ENST0000045677

T00000420246,ENST00000420246,ENST00000420246,ENST00000420246,ENST00000445888,ENST0000044588

T00000360156,ENST00000360156,ENST00000360156,ENST00000360156,ENST00000394610,ENST0000039461

T00000349350,ENST00000349350,ENST00000349350,ENST00000349350,ENST00000349350,ENST0000034935

T00000427578,ENST00000427578,ENST00000427578,ENST00000427578,ENST00000427578,ENST0000042757



T00000523833,ENST00000523833,ENST00000523833,ENST00000523833,ENST00000523833,ENST00000523833

T00000370161,ENST00000370161,ENST00000370161,ENST00000370161,ENST00000370161,ENST00000370161

T00000371438,ENST00000371438,ENST00000371438,ENST00000371438,ENST00000371438,ENST00000371438

T00000379240,ENST00000379240,ENST00000379240,ENST00000379240,ENST00000379240,ENST00000379240

T00000420246,ENST00000420246,ENST00000420246,ENST00000420246,ENST00000445888,ENST00000445888

T00000523833,ENST00000523833,ENST00000523833,ENST00000523833,ENST00000523833,ENST00000523833

T00000370161,ENST00000370161,ENST00000370161,ENST00000370161,ENST00000370161,ENST0000037016

T00000371438,ENST00000371438,ENST00000371438,ENST00000371438,ENST00000371438,ENST0000037143

T00000379240,ENST00000379240,ENST00000379240,ENST00000379240,ENST00000379240,ENST0000037924

T00000420246,ENST00000420246,ENST00000420246,ENST00000420246,ENST00000445888,ENST0000044588







T00000360301,ENST00000360301,ENST00000360301,ENST00000360301,ENST00000381879,ENST0000038187

T00000371357,ENST00000371357,ENST00000371357,ENST00000371357,ENST00000371363,ENST0000037136

T00000420246,ENST00000420246,ENST00000420246,ENST00000420246,ENST00000445888,ENST0000044588

T00000415380,ENST00000415380,ENST00000415380,ENST00000415380,ENST00000540495,ENST00000540495

T00000555203,ENST00000555203,ENST00000555203,ENST00000555203,ENST00000555203,ENST00000555203

T00000552128,ENST00000552128,ENST00000552128,ENST00000552128

T00000450347,ENST00000450347,ENST00000450347,ENST00000450347,ENST00000450347,ENST0000045034

T00000521193,ENST00000521193,ENST00000521193,ENST00000521193,ENST00000521193,ENST0000052119

T00000367570,ENST00000367570,ENST00000367570,ENST00000367570,ENST00000367570,ENST0000036757



































































































































































































896,NM\_001322897,NM\_001322898,NM\_001322899,NM\_001322900,NM\_002313,NM\_006720



896,NM\_001322897,NM\_001322898,NM\_001322899,NM\_001322900,NM\_002313,NM\_006720



896,NM\_001322897,NM\_001322898,NM\_001322899,NM\_001322900,NM\_002313,NM\_006720

























l8,ENST00000554848,ENST0000055528,ENST0000055528,ENST0000055528,ENST0000055528,ENST0000(

¸7,ENST00000360967,ENST00000360967,ENST00000361163,ENST00000361163,ENST00000361163,ENST0000(

'8,ENST00000427578,ENST00000427578,ENST00000443370,ENST00000443370,ENST00000443370,ENST0000(
¸6,ENST00000367486,ENST00000445192,ENST00000445192,ENST00000445192,ENST00000445192,ENST0000(

2,ENST00000445192,ENST00000445192





39,ENST00000393489,ENST00000393489,ENST00000393489,ENST00000393489,ENST00000393489,ENST00000393489,ENST00000393489,ENST00000393489,ENST00000393489

73,ENST00000543873,ENST00000555375,ENST00000555375,ENST00000555375,ENST00000555375,ENST00000555375,ENST00000555375,ENST00000555375,ENST00000555375,ENST00000555375

11,ENST00000591111,ENST00000591111







'8,ENST00000427578,ENST00000427578,ENST00000443370,ENST00000443370,ENST00000443370,ENST0000( )2,ENST00000445192,ENST00000445192

l1,ENST00000468211,ENST00000468211

is2,ENST00000419752,ENST00000419752,ENST00000419752,ENST00000419752,ENST00000419752,ENST0000(











!8,ENST00000391828,ENST00000391828

!8,ENST00000471418,ENST00000474710,ENST00000474710,ENST00000474710,ENST00000474710,ENST00000474710,ENST00000474710

!5,ENST00000370335,ENST00000370335,ENST00000370335,ENST00000370335,ENST00000370335,ENST00000370335,ENST00000370335,ENST00000370335  
!6,ENST00000447016,ENST00000447207,ENST00000447207,ENST00000447207,ENST00000447207,ENST00000447207,ENST00000447207,ENST00000447207

!7,ENST00000526827,ENST00000536126,ENST00000536126,ENST00000536126,ENST00000536126,ENST00000536126,ENST00000536126,ENST00000536126

!6,ENST00000404816,ENST00000407925,ENST00000407925,ENST00000407925,ENST00000407925,ENST00000407925,ENST00000407925,ENST00000407925



'8,ENST00000456778,ENST00000521353,ENST00000521353,ENST00000521353,ENST00000521353,ENST00000521353,ENST00000521353

38,ENST00000445888,ENST00000445888,ENST00000445888,ENST00000445888,ENST00000445888,ENST00000445888,ENST00000445888

l0,ENST00000394610,ENST00000394610,ENST00000394610,ENST00000394610,ENST00000394610,ENST00000394610,ENST00000394610

50,ENST00000349350,ENST00000349350,ENST00000421100,ENST00000421100,ENST00000421100,ENST00000421100,ENST00000421100

'8,ENST00000427578,ENST00000427578,ENST00000443370,ENST00000443370,ENST00000443370,ENST00000443370,ENST00000443370







3,ENST00000523833,ENST00000524144,ENST00000524144,ENST00000524144,ENST00000524144,ENST00000524144,ENST0000











05,ENST00000540495,ENST00000540495,ENST00000540495,ENST00000540495,ENST00000540495,ENST00000540495,ENST00000540495

03,ENST00000555203,ENST00000555833,ENST00000555833,ENST00000555833,ENST00000555833,ENST00000555833,ENST00000555833



































































































































































































































0443370,ENST00000443370,ENST00000443370,ENST00000443370,ENST00000443370,ENST00000443370,ENS  
0445192,ENST00000445192,ENST00000445192,ENST00000533951,ENST00000533951,ENST00000533951,ENS



055528,ENST0000055528,ENST0000055528,ENST00000555926,ENST00000555926,ENST00000555926,ENS

0361163,ENST00000361163,ENST00000361163,ENST00000361163,ENST00000361163,ENST00000361163,ENS

0443370,ENST00000443370,ENST00000443370,ENST00000443370,ENST00000443370,ENST00000443370,ENS  
0445192,ENST00000445192,ENST00000445192,ENST00000533951,ENST00000533951,ENST00000533951,ENS



0393489,ENST00000393491,ENST00000393491,ENST00000393491,ENST00000393491,ENST00000393491,ENS

0555375,ENST00000555375,ENST00000555375,ENST00000556155,ENST00000556155,ENST00000556155,ENS

0395161,ENST00000503911,ENST00000503911,ENST00000503911,ENST00000503911,ENST00000503911,ENS

0423061,ENST00000448038,ENST00000448038,ENST00000448038,ENST00000448038,ENST00000448038,ENS



0393489,ENST00000393491,ENST00000393491,ENST00000393491,ENST00000393491,ENST00000393491,ENS

0555375,ENST00000555375,ENST00000555375,ENST00000556155,ENST00000556155,ENST00000556155,ENS

0395161,ENST00000503911,ENST00000503911,ENST00000503911,ENST00000503911,ENST00000503911,ENS

0413952,ENST00000434526,ENST00000434526,ENST00000434526,ENST00000434526,ENST00000434526,ENS

0393489,ENST00000393491,ENST00000393491,ENST00000393491,ENST00000393491,ENST00000393491,ENS

0455313,ENST00000455313,ENST00000455313,ENST00000455313,ENST00000455313,ENST00000455313,ENS  
0555375,ENST00000555375,ENST00000555375,ENST00000556155,ENST00000556155,ENST00000556155,ENS

0395161,ENST00000503911,ENST00000503911,ENST00000503911,ENST00000503911,ENST00000503911,ENS

0443370,ENST00000443370,ENST00000443370,ENST00000443370,ENST00000443370,ENST00000443370,ENS

0419752,ENST00000429972,ENST00000429972,ENST00000429972,ENST00000429972,ENST00000429972,ENS









0524144,ENST00000524144,ENST00000524144,ENST00000524168,ENST00000524168,ENST00000524168,ENS

0370163,ENST00000370163,ENST00000370163,ENST00000370165,ENST00000370165,ENST00000370165,ENS

0379244,ENST00000379244,ENST00000379244,ENST00000379244,ENST00000379244,ENST00000379244,ENS

0474710,ENST00000474710,ENST00000474710,ENST00000481632,ENST00000481632,ENST00000481632,ENS

0370335,ENST00000370335,ENST00000370335,ENST00000370335,ENST00000370335,ENST00000370335,ENS  
0447207,ENST00000447207,ENST00000447207,ENST00000538201,ENST00000538201,ENST00000538201,ENS

0536126,ENST00000536126,ENST00000536126,ENST00000543718,ENST00000543718,ENST00000543718,ENS

0407925,ENST00000407925,ENST00000407925,ENST00000418533,ENST00000418533,ENST00000418533,ENS

0521353,ENST00000521353,ENST00000521353,ENST00000522736,ENST00000522736,ENST00000522736,ENS

0445888,ENST00000455263,ENST00000455263,ENST00000455263,ENST00000455263,ENST00000455263,ENS

0394610,ENST00000394616,ENST00000394616,ENST00000394616,ENST00000394616,ENST00000394616,ENS

0421100,ENST00000421100,ENST00000421100,ENST00000421100,ENST00000421100,ENST00000421100,ENS

0443370,ENST00000443370,ENST00000443370,ENST00000443370,ENST00000443370,ENST00000443370,ENS





0524144,ENST00000524144,ENST00000524144,ENST00000524168,ENST00000524168,ENST00000524168,ENS

0370163,ENST00000370163,ENST00000370163,ENST00000370165,ENST00000370165,ENST00000370165,ENS

0465038,ENST00000465038,ENST00000465038,ENST00000541979,ENST00000541979,ENST00000541979,ENS

0379244,ENST00000379244,ENST00000379244,ENST00000379244,ENST00000379244,ENST00000379244,ENS

0445888,ENST00000455263,ENST00000455263,ENST00000455263,ENST00000455263,ENST00000455263,ENS

0524144,ENST00000524144,ENST00000524144,ENST00000524168,ENST00000524168,ENST00000524168,ENS

0370163,ENST00000370163,ENST00000370163,ENST00000370165,ENST00000370165,ENST00000370165,ENS

0465038,ENST00000465038,ENST00000465038,ENST00000541979,ENST00000541979,ENST00000541979,ENS

0379244,ENST00000379244,ENST00000379244,ENST00000379244,ENST00000379244,ENST00000379244,ENS

0445888,ENST00000455263,ENST00000455263,ENST00000455263,ENST00000455263,ENST00000455263,ENS



0320492,ENST00000320492,ENST00000320492,ENST00000320492,ENST00000320492,ENST00000320492,ENS  
0524144,ENST00000524144,ENST00000524144,ENST00000524168,ENST00000524168,ENST00000524168,ENS

0370163,ENST00000370163,ENST00000370163,ENST00000370165,ENST00000370165,ENST00000370165,ENS

0465038,ENST00000465038,ENST00000465038,ENST00000541979,ENST00000541979,ENST00000541979,ENS

0379244,ENST00000379244,ENST00000379244,ENST00000379244,ENST00000379244,ENST00000379244,ENS

0381879,ENST00000381885,ENST00000381885,ENST00000381885,ENST00000381885,ENST00000381885,ENS

0371363,ENST00000371367,ENST00000371367,ENST00000371367,ENST00000371367,ENST00000371367,ENS

0445888,ENST00000455263,ENST00000455263,ENST00000455263,ENST00000455263,ENST00000455263,ENS

0540495,ENST00000541205,ENST00000541205,ENST00000541205,ENST00000541205,ENST00000541205,ENS

0555833,ENST00000555833,ENST00000555833,ENST00000556134,ENST00000556134,ENST00000556134,ENS



0452989,ENST00000452989,ENST00000452989,ENST00000606214,ENST00000606214,ENST00000606214,ENS

0522041,ENST00000522041,ENST00000522041,ENST00000523676,ENST00000523676,ENST00000523676,ENS

0367573,ENST00000367573,ENST00000367573,ENST00000526775,ENST00000526775,ENST00000526775,ENS

































































































































































































































T00000449052,ENST00000449052,ENST00000449052,ENST00000449052,ENST00000449052,ENST000004490!  
T00000533951,ENST00000533951,ENST00000533951,ENST00000533951

T00000555926,ENST00000555926,ENST00000555926,ENST00000555926

T00000361163,ENST00000361163,ENST00000361163,ENST00000409914,ENST00000409914,ENST00000409914,ENST00000409914,ENST00000409914

T00000449052,ENST00000449052,ENST00000449052,ENST00000449052,ENST00000449052,ENST00000449052,ENST00000449052,ENST00000449052,ENST00000449052,ENST00000449052  
T00000533951,ENST00000533951,ENST00000533951,ENST00000533951,ENST00000533951





T00000393491,ENST00000393491,ENST00000393491,ENST00000393491,ENST00000393491,ENST00000393491,ENST00000393491

T00000556155,ENST00000556155,ENST00000556155,ENST00000556155

T00000503911,ENST00000503911,ENST00000503911,ENST00000503911,ENST00000503911,ENST00000503911,ENST00000503911,ENST000005067

T00000448038,ENST00000448038,ENST00000448038,ENST00000537033,ENST00000537033,ENST00000537033,ENST00000537033,ENST00000537033,ENST00000537033,ENST00000537033





T00000503911,ENST00000503911,ENST00000503911,ENST00000503911,ENST00000503911,ENST000005067

T00000434526,ENST00000434526,ENST00000434526,ENST00000437307,ENST00000437307,ENST0000043730

T00000393491,ENST00000393491,ENST00000393491,ENST00000393491,ENST00000393491,ENST00000393491,ENST00000393491

T00000535621,ENST00000535621,ENST00000535621,ENST00000535621,ENST00000535621,ENST00000535621,ENST00000535621  
T00000556155,ENST00000556155,ENST00000556155,ENST00000556155,ENST00000556155

T00000503911,ENST00000503911,ENST00000503911,ENST00000503911,ENST00000503911,ENST00000503911,ENST00000503911











T00000524168,ENST00000524168,ENST00000524168,ENST00000524168

T00000370165,ENST00000370165,ENST00000370165,ENST00000370165

T00000379244,ENST00000379244,ENST00000379244,ENST00000379244,ENST00000379244,ENST00000379244,ENST00000379244,



T00000522736,ENST00000522736,ENST00000522736,ENST00000522736

T00000455263,ENST00000455263,ENST00000455263,ENST00000509690,ENST00000509690,ENST00000509690

T00000394616,ENST00000394616,ENST00000394616,ENST00000394617,ENST00000394617,ENST00000394617

T00000421100,ENST00000421100,ENST00000421100,ENST00000421100,ENST00000421100,ENST00000421100

T00000449052,ENST00000449052,ENST00000449052,ENST00000449052,ENST00000449052,ENST00000449052



T00000524168,ENST00000524168,ENST00000524168,ENST00000524168

T00000370165,ENST00000370165,ENST00000370165,ENST00000370165

T00000541979,ENST00000541979,ENST00000541979,ENST00000541979

T00000379244,ENST00000379244,ENST00000379244,ENST00000379244,ENST00000379244,ENST00000379244

T00000455263,ENST00000455263,ENST00000455263,ENST00000509690,ENST00000509690,ENST00000509690



T00000524168,ENST00000524168,ENST00000524168,ENST00000524168

T00000370165,ENST00000370165,ENST00000370165,ENST00000370165

T00000541979,ENST00000541979,ENST00000541979,ENST00000541979

T00000379244,ENST00000379244,ENST00000379244,ENST00000379244,ENST00000379244,ENST00000379244

T00000455263,ENST00000455263,ENST00000455263,ENST00000509690,ENST00000509690,ENST00000509690



T00000320492,ENST00000320492,ENST00000320492,ENST00000357036,ENST00000357036,ENST000003570:  
T00000524168,ENST00000524168,ENST00000524168,ENST00000524168

T00000370165,ENST00000370165,ENST00000370165,ENST00000370165

T00000541979,ENST00000541979,ENST00000541979,ENST00000541979

T00000379244,ENST00000379244,ENST00000379244,ENST00000379244,ENST00000379244,ENST000003792:

T00000381885,ENST00000381885,ENST00000381885,ENST00000396923,ENST00000396923,ENST00000396923

T00000371367,ENST00000371367,ENST00000371367,ENST00000371372,ENST00000371372,ENST00000371372

T00000455263,ENST00000455263,ENST00000455263,ENST00000509690,ENST00000509690,ENST00000509690

T00000541205,ENST00000541205,ENST00000541205,ENST00000544327,ENST00000544327,ENST000005443:

T00000556134,ENST00000556134,ENST00000556134,ENST00000556134

T00000606214,ENST00000606214,ENST00000606214,ENST00000606214

T00000523676,ENST00000523676,ENST00000523676,ENST00000523676

T00000526775,ENST00000526775,ENST00000526775,ENST00000526775



































































































































































































































52,ENST00000449052,ENST00000449052,ENST00000449052,ENST00000538115,ENST00000538115,ENST0000

14,ENST00000409914,ENST00000409914,ENST00000409914,ENST00000409914,ENST00000409914,ENST0000

52,ENST00000449052,ENST00000449052,ENST00000449052,ENST00000538115,ENST00000538115,ENST0000



94,ENST00000393494,ENST00000393494,ENST00000393494,ENST00000393494,ENST00000393494,ENST0000

73,ENST00000506773,ENST00000506773,ENST00000506773,ENST00000506773,ENST00000506773,ENST0000

33,ENST00000537033,ENST00000537033,ENST00000537033,ENST00000537033,ENST00000537033,ENST0000







73,ENST00000506773,ENST00000506773,ENST00000506773,ENST00000506773,ENST00000506773,ENST0000

07,ENST00000437307,ENST00000437307,ENST00000437307,ENST00000437307,ENST00000437307,ENST0000

94,ENST00000393494,ENST00000393494,ENST00000393494,ENST00000393494,ENST00000393494,ENST0000

21,ENST00000535621,ENST00000535621,ENST00000535621,ENST00000563679,ENST00000563679,ENST0000

73,ENST00000506773,ENST00000506773,ENST00000506773,ENST00000506773,ENST00000506773,ENST0000

52,ENST00000449052,ENST00000449052,ENST00000449052,ENST00000538115,ENST00000538115,ENST0000

82,ENST00000490882,ENST00000490882,ENST00000490882,ENST00000490882,ENST00000490882,ENST0000











44,ENST00000379244,ENST00000379246,ENST00000379246,ENST00000379246,ENST00000379246,ENST00000379246,ENST0000

37,ENST00000370337,ENST00000370337,ENST00000370337,ENST00000370337,ENST00000370337,ENST0000

90,ENST00000509690,ENST00000509690,ENST00000509690,ENST00000509690,ENST00000509690,ENST0000

17,ENST00000394617,ENST00000394617,ENST00000394617,ENST00000394617,ENST00000394617,ENST0000

00,ENST00000421100,ENST00000421100,ENST00000421100,ENST00000427578,ENST00000427578,ENST0000

52,ENST00000449052,ENST00000449052,ENST00000449052,ENST00000538115,ENST00000538115,ENST0000



44,ENST00000379244,ENST00000379246,ENST00000379246,ENST00000379246,ENST00000379246,ENST00000379246,ENST0000

90,ENST00000509690,ENST00000509690,ENST00000509690,ENST00000509690,ENST00000509690,ENST0000



44,ENST00000379244,ENST00000379246,ENST00000379246,ENST00000379246,ENST00000379246,ENST00000379246,ENST0000

90,ENST00000509690,ENST00000509690,ENST00000509690,ENST00000509690,ENST00000509690,ENST00000509690,ENST0000





36,ENST00000357036,ENST00000357036,ENST00000357036,ENST00000357036,ENST00000357036,ENST0000

44,ENST00000379244,ENST00000379246,ENST00000379246,ENST00000379246,ENST00000379246,ENST0000

23,ENST00000396923,ENST00000396923,ENST00000396923,ENST00000396923,ENST00000396923,ENST0000

72,ENST00000371372,ENST00000371372,ENST00000371372,ENST00000371372,ENST00000371372,ENST0000

90,ENST00000509690,ENST00000509690,ENST00000509690,ENST00000509690,ENST00000509690,ENST0000

27,ENST00000544327,ENST00000544327,ENST00000544327,ENST00000544327,ENST00000544327,ENST0000











































































































































































































































0393494,ENST00000393494,ENST00000393494,ENST00000393494,ENST00000393498,ENST00000393498,ENS

0506773,ENST00000506773,ENST00000506773,ENST00000506773,ENST00000511167,ENST00000511167,ENS

0540663,ENST00000540663,ENST00000540663,ENST00000540663,ENST00000540663,ENST00000540663,ENS



0393494,ENST00000393494,ENST00000393494,ENST00000393494,ENST00000393498,ENST00000393498,ENS

0506773,ENST00000506773,ENST00000506773,ENST00000506773,ENST00000511167,ENST00000511167,ENS

0451338,ENST00000451338,ENST00000451338,ENST00000451338,ENST00000451338,ENST00000451338,ENS



0393494,ENST00000393494,ENST00000393494,ENST00000393494,ENST00000393498,ENST00000393498,ENS

0563679,ENST00000563679,ENST00000563679,ENST00000563679,ENST00000563679,ENST00000563679,ENS

0506773,ENST00000506773,ENST00000506773,ENST00000506773,ENST00000511167,ENST00000511167,ENS











0379246,ENST00000379246,ENST00000379246,ENST00000379246,ENST00000379246,ENST00000379246,ENS

0370337,ENST00000370337,ENST00000370337,ENST00000370337,ENST00000370340,ENST00000370340,ENS







0379246,ENST00000379246,ENST00000379246,ENST00000379246,ENST00000379246,ENST00000379246,ENS

0514944,ENST00000514944,ENST00000514944,ENST00000514944,ENST00000514944,ENST00000514944,ENS



0379246,ENST00000379246,ENST00000379246,ENST00000379246,ENST00000379246,ENST00000379246,ENS

0514944,ENST00000514944,ENST00000514944,ENST00000514944,ENST00000514944,ENST00000514944,ENS



0357036,ENST00000357036,ENST00000357036,ENST00000357036,ENST00000357036,ENST00000357036,ENST

0379246,ENST00000379246,ENST00000379246,ENST00000379246,ENST00000379246,ENST00000379246,ENST



0420765,ENST00000420765,ENST00000420765,ENST00000420765,ENST00000420765,ENST00000420765,ENST00000420765,ENS

0545473,ENST00000545473,ENST00000545473,ENST00000545473,ENST00000545473,ENST00000545473,ENST00000545473,ENS

0514944,ENST00000514944,ENST00000514944,ENST00000514944,ENST00000514944,ENST00000514944,ENST00000514944,ENS





































































































































































































































ST00000538115,ENST00000542585,



ST00000538115,ENST00000542585,



ST00000393498,ENST00000393498,

ST00000511167,ENST00000511167,

ST00000540663,ENST00000540663



ST00000393498,ENST00000393498,

ST00000511167,ENST00000511167,

ST00000451338,ENST00000451338

ST00000393498,ENST00000393498,

ST00000563679,ENST00000567306,

ST00000511167,ENST00000511167,

ST00000538115,ENST00000542585,

ST00000493452,ENST00000493452











ST00000379246,ENST00000379246,

ST00000370340,ENST00000370340,

ST00000514944,ENST00000514944

ST00000489216,ENST00000489216

ST00000427578,ENST00000427578,

ST00000538115,ENST00000542585,





ST00000379246,ENST00000379246,

ST00000514944,ENST00000514944



ST00000379246,ENST00000379246,

ST00000514944,ENST00000514944



ST00000357036,ENST00000357036,

ST00000379246,ENST00000379246,

ST00000420765,ENST00000420765

ST00000545473,ENST00000545473

ST00000514944,ENST00000514944

ST00000546215,ENST00000546215
